# Supplementary material for: Transcriptional and epigenetic characterization of early striosomes identifies Foxf2 and Olig2 as factors required for development of striatal compartmentation and neuronal phenotypic differentiation
Source: bioRxiv preprint, doi:10.1101/2020.05.19.105171, version 2 (2020-05-28)
Supplement: Sup Table 2 [file 105171_file06.xlsx]

## Sheet: Supplementary Table 2
Peak ID	seqnames	start	end	width	logFC	logCPM	F	PValue	FDR	annotation	geneChr	geneStart	geneEnd	geneLength	distanceToTSS	ENSEMBL	Gene symbol
Peak_50530	chr5	45943716	45944833	1118	3.67053	5.70604	558.198	9.83157e-17	6.04005e-12	Distal Intergenic	5	45926822	45932409	5588	-11307	ENSMUSG00000106602	4930405L22Rik
Peak_31208	chr18	31949578	31950357	780	4.04943	5.54417	527.767	1.74518e-16	6.04005e-12	Promoter (<=1kb)	18	31942999	31949636	6638	0	ENSMUSG00000052229	Gpr17
Peak_36411	chr2	56996857	56997837	981	4.08955	5.28427	483.421	4.27535e-16	7.7834e-12	Distal Intergenic	2	57107226	57115038	7813	117201	ENSMUSG00000026826	Nr4a2
Peak_14188	chr12	47275812	47276399	588	4.09512	5.07173	465.786	6.24219e-16	7.7834e-12	Distal Intergenic	12	46719778	46818775	98998	-457037	ENSMUSG00000021047	Nova1
Peak_17891	chr13	71507375	71508534	1160	2.71504	6.09965	446.813	9.52694e-16	7.7834e-12	Intron (uc007rdc.1/uc007rdc.1, intron 1 of 1)	13	71107089	71107209	121	400286	ENSMUSG00000080580	Mir466f-4
Peak_24008	chr15	63675438	63676353	916	3.6245	5.22359	443.498	1.02755e-15	7.7834e-12	Distal Intergenic	15	63775971	63808739	32769	132386	ENSMUSG00000079025	Gsdmc
Peak_15348	chr12	91654170	91654963	794	3.63965	5.09639	440.431	1.10256e-15	7.7834e-12	Intron (uc007okt.2/108800, intron 4 of 6)	12	91555262	91590487	35226	-63683	ENSMUSG00000020962	Gtf2a1
Peak_23790	chr15	56847217	56848135	919	4.1219	5.31988	439.764	1.11965e-15	7.7834e-12	Distal Intergenic	15	56665627	56694546	28920	-152671	ENSMUSG00000022367	Has2
Peak_46942	chr4	68765702	68766688	987	3.81875	6.37474	527.706	1.16608e-15	7.7834e-12	Intron (uc008thw.1/56710, intron 7 of 7)	4	68761372	68954397	193026	187709	ENSMUSG00000028351	Brinp1
Peak_37295	chr2	84094591	84095148	558	4.23544	4.70027	435.582	1.23368e-15	7.7834e-12	Distal Intergenic	2	83916764	83941226	24463	-153365	ENSMUSG00000034552	Zswim2
Peak_15360	chr12	91831334	91831946	613	4.47496	4.77452	432.281	1.33267e-15	7.7834e-12	Exon (uc007okx.1/20338, exon 5 of 21)	12	91806043	91849157	43115	17211	ENSMUSG00000020964	Sel1l
Peak_45627	chr4	18169826	18170732	907	5.05753	5.54628	492.886	1.34933e-15	7.7834e-12	Distal Intergenic	4	17853458	18118734	265277	316368	ENSMUSG00000028226	Mmp16
Peak_19386	chr13	116973399	116974065	667	3.64174	4.94518	410.433	2.25383e-15	1.20008e-11	Intron (uc007ryi.1/52552, intron 2 of 24)	13	116854824	117025277	170454	51212	ENSMUSG00000021725	Parp8
Peak_10792	chr11	45789593	45790335	743	4.46117	4.9374	404.141	2.63503e-15	1.30284e-11	Distal Intergenic	11	45808083	45842878	34796	-17748	NA	F630206G17Rik
Peak_5895	chr10	14482267	14482965	699	3.34854	5.049	393.752	3.42826e-15	1.58203e-11	Intron (uc007elk.1/215798, intron 2 of 24)	10	14402585	14545036	142452	62071	ENSMUSG00000039116	Adgrg6
Peak_46879	chr4	65888260	65889184	925	2.88923	5.58461	390.36	3.74125e-15	1.61856e-11	Intron (uc008thn.1/56079, intron 10 of 22)	4	65604986	65616240	11255	283274	ENSMUSG00000051675	Trim32
Peak_31687	chr18	45123050	45123957	908	-3.50169	5.29565	385.161	4.28337e-15	1.71066e-11	Distal Intergenic	18	45268860	45685883	417024	-144903	ENSMUSG00000054477	Kcnn2
Peak_32953	chr18	83153063	83153849	787	4.22628	4.88719	383.72	4.44841e-15	1.71066e-11	Distal Intergenic	18	83292792	83325884	33093	172035	NA	4921531P14Rik
Peak_30937	chr18	22713635	22714298	664	-4.38607	4.60157	380.011	4.90616e-15	1.78739e-11	Intron (uc008efn.2/319211, intron 3 of 3)	18	22693155	22770942	77788	56644	ENSMUSG00000041923	Nol4
Peak_45315	chr4	8374607	8375424	818	3.53908	5.67382	402.238	5.43924e-15	1.88252e-11	Distal Intergenic	4	8141493	8239041	97549	-135566	ENSMUSG00000041261	Car8
Peak_5622	chr10	7605059	7605645	587	5.01837	4.46265	371.866	6.10313e-15	1.95315e-11	Intron (uc007ehv.2/237253, intron 5 of 5)	10	7589800	7625477	35678	15259	ENSMUSG00000019796	Lrp11
Peak_44125	chr3	131690485	131691111	627	3.96741	4.81072	370.018	6.41693e-15	1.95315e-11	Distal Intergenic	3	131566032	131643671	77640	124453	ENSMUSG00000028032	Papss1
Peak_38173	chr2	117210482	117211216	735	2.76773	5.52055	369.604	6.48981e-15	1.95315e-11	Distal Intergenic	2	117185127	117185226	100	25355	ENSMUSG00000076376	Mir674
Peak_729	chr1	34189222	34190460	1239	4.04964	5.43563	392.635	7.04522e-15	2.03196e-11	Exon (uc007aon.2/13518, exon 39 of 103)	1	34215269	34229246	13978	-24809	ENSMUSG00000026131	Dst
Peak_66079	chr9	78145891	78146874	984	3.23266	5.10926	363.533	7.66673e-15	2.11871e-11	Intron (uc009qtt.2/56542, intron 5 of 13)	9	78155323	78172109	16787	-8449	ENSMUSG00000009828	Ick
Peak_33602	chr19	18615887	18616699	813	3.7906	4.72001	362.187	7.95817e-15	2.11871e-11	Intron (uc008gxs.2/20409, intron 1 of 9)	19	18580364	18631813	51450	15114	ENSMUSG00000024725	Ostf1
Peak_53266	chr6	7084323	7084808	486	3.60981	4.80997	360.41	8.36146e-15	2.14363e-11	Distal Intergenic	6	6956018	7039220	83203	128305	ENSMUSG00000042505	Sdhaf3
Peak_14261	chr12	50698583	50699384	802	3.931	5.17387	361.185	9.70121e-15	2.39828e-11	Distal Intergenic	12	50341232	50649223	307992	-49360	ENSMUSG00000002688	Prkd1
Peak_42361	chr3	83027330	83028281	952	-4.2108	4.41174	353.551	1.01422e-14	2.42084e-11	Promoter (1-2kb)	3	83026153	83033617	7465	1177	ENSMUSG00000028001	Fga
Peak_63220	chr8	95375311	95375965	655	4.68705	4.38846	346.818	1.23014e-14	2.83835e-11	Distal Intergenic	8	95352296	95374293	21998	23015	ENSMUSG00000031790	Mmp15
Peak_27488	chr16	84987487	84988166	680	3.94646	4.62154	341.161	1.45074e-14	3.13351e-11	Intron (uc007ztm.2/11820, intron 12 of 15)	16	84972211	84979451	7241	15276	NA	Gm10791
Peak_22708	chr15	12490645	12491561	917	2.5	5.786	340.726	1.46938e-14	3.13351e-11	Intron (uc007vhq.1/68070, intron 1 of 23)	15	12407260	12549877	142618	58316	ENSMUSG00000022197	Pdzd2
Peak_23236	chr15	34824068	34824925	858	-3.64928	4.6773	340.165	1.49387e-14	3.13351e-11	Distal Intergenic	15	34837355	34843407	6053	-12430	ENSMUSG00000050963	Kcns2
Peak_5820	chr10	12911593	12912609	1017	2.73101	5.06825	334.429	1.77133e-14	3.60623e-11	Distal Intergenic	10	12916646	12923127	6482	10518	ENSMUSG00000097378	B230208H11Rik
Peak_53181	chr6	4982628	4983335	708	3.6707	5.26357	341.559	2.06176e-14	3.92481e-11	Intron (uc009avx.1/243725, intron 2 of 15)	6	4905226	5154249	249024	77402	ENSMUSG00000032827	Ppp1r9a
Peak_13516	chr12	26394629	26395775	1147	3.44736	5.4011	341.054	2.09205e-14	3.92481e-11	Intron (uc007nff.2/108089, intron 2 of 9)	12	26414901	26415010	110	19235	ENSMUSG00000098771	Mir6538
Peak_44275	chr3	135594271	135595065	795	3.95051	4.63198	328.821	2.09792e-14	3.92481e-11	Exon (uc012cye.1/18033, exon 3 of 9)	3	135584655	135603851	19197	8786	ENSMUSG00000028163	Nfkb1
Peak_2203	chr1	82831444	82832206	763	3.85026	4.62336	326.922	2.22305e-14	4.04946e-11	Distal Intergenic	1	82839460	82901001	61542	-7254	ENSMUSG00000026159	Agfg1
Peak_60656	chr8	4369771	4370517	747	3.98115	4.71285	325.224	2.34185e-14	4.12701e-11	Distal Intergenic	8	4349588	4360020	10433	20183	ENSMUSG00000023235	Ccl25
Peak_51861	chr5	101090526	101091684	1159	-2.95115	5.10639	323.287	2.48592e-14	4.12701e-11	Distal Intergenic	5	100846364	100899102	52739	244162	ENSMUSG00000029314	Gpat3
Peak_18755	chr13	101470410	101471242	833	3.02791	5.44659	323.123	2.4986e-14	4.12701e-11	Distal Intergenic	13	101391871	101397580	5710	-72830	NA	4922502H24Rik
Peak_33843	chr19	25439387	25440364	978	4.10419	5.14251	344.098	2.50411e-14	4.12701e-11	Distal Intergenic	19	25409086	25434496	25411	30301	ENSMUSG00000032702	Kank1
Peak_15369	chr12	92246642	92247525	884	3.02892	5.26521	322.022	2.58527e-14	4.16168e-11	Distal Intergenic	12	91841458	91849157	7700	-397485	ENSMUSG00000020964	Sel1l
Peak_67084	chr9	110293090	110294051	962	4.016	4.81039	320.866	2.67983e-14	4.21586e-11	Distal Intergenic	9	110305192	110322102	16911	-11141	ENSMUSG00000054836	Elp6
Peak_54113	chr6	37418885	37419894	1010	3.81656	4.50274	317.871	2.9429e-14	4.4656e-11	Intron (uc009bjf.2/208647, intron 1 of 11)	6	37331021	37442148	111128	22254	ENSMUSG00000038648	Creb3l2
Peak_45628	chr4	18220554	18221223	670	4.28353	4.51625	317.605	2.9676e-14	4.4656e-11	Distal Intergenic	4	17853458	18118734	265277	367096	ENSMUSG00000028226	Mmp16
Peak_14886	chr12	75424240	75424881	642	3.84919	4.56099	316.412	3.0812e-14	4.5251e-11	Distal Intergenic	12	75411720	75416781	5062	-7459	ENSMUSG00000048982	Gphb5
Peak_33063	chr18	86232189	86232857	669	3.30577	5.12768	315.834	3.13789e-14	4.5251e-11	Distal Intergenic	18	86394952	86501897	106946	-162095	ENSMUSG00000050321	Neto1
Peak_68527	chrX	106938857	106939834	978	4.42239	4.67639	315.077	3.2139e-14	4.53704e-11	Distal Intergenic	20	106920625	106933899	13275	18232	ENSMUSG00000049929	Lpar4
Peak_63984	chr8	124754328	124754991	664	4.45975	4.65019	313.987	3.32702e-14	4.53704e-11	Promoter (2-3kb)	8	124740257	124751809	11553	-2519	ENSMUSG00000043068	Fam89a
Peak_44492	chr3	141600868	141601770	903	3.29274	5.34406	318.346	3.34281e-14	4.53704e-11	Intron (uc008roc.1/22253, intron 1 of 1)	3	141465564	141834924	369361	135304	ENSMUSG00000059921	Unc5c
Peak_46142	chr4	40936236	40937048	813	3.38156	5.5237	332.79	3.46651e-14	4.61446e-11	3' UTR	4	40936398	40948294	11897	11246	ENSMUSG00000028416	Bag1
Peak_41078	chr3	37748172	37749030	859	3.77923	4.68214	310.718	3.69302e-14	4.78378e-11	Distal Intergenic	3	37714190	37724360	10171	-23812	ENSMUSG00000058174	Gm5148
Peak_61145	chr8	24649840	24650482	643	3.74917	4.2923	310.391	3.73193e-14	4.78378e-11	Intron (uc012gbl.1/13524, intron 4 of 13)	8	24602246	24653811	51566	3329	ENSMUSG00000031552	Adam18
Peak_37976	chr2	110210273	110211147	875	2.72382	5.87619	320.769	3.9446e-14	4.9555e-11	Distal Intergenic	2	110265083	110305725	40643	94578	ENSMUSG00000041660	Bbox1
Peak_36197	chr2	50173638	50174537	900	4.00613	5.04998	322.733	4.00907e-14	4.9555e-11	Exon (uc008jqa.3/320343, exon 4 of 6)	2	50066429	50193569	127141	107209	ENSMUSG00000050447	Lypd6
Peak_20148	chr14	33974597	33975225	629	3.8461	4.5282	306.322	4.25633e-14	5.14457e-11	Intron (uc007tae.1/382867, intron 1 of 1)	14	33967070	33978764	11695	3539	ENSMUSG00000044519	Zfp488
Peak_20374	chr14	46408860	46409640	781	4.64383	4.54413	305.541	4.36603e-14	5.14457e-11	Distal Intergenic	14	46383525	46390669	7145	-18191	ENSMUSG00000021835	Bmp4
Peak_13946	chr12	39526719	39527738	1020	3.3206	4.88195	305.289	4.40202e-14	5.14457e-11	Distal Intergenic	12	40005447	40037376	31930	509638	ENSMUSG00000047446	Arl4a
Peak_61580	chr8	39126257	39126705	449	4.31359	4.5741	304.822	4.46968e-14	5.14457e-11	Exon (uc029wso.1/80286, exon 7 of 8)	8	39005867	39130817	124951	120390	ENSMUSG00000039530	Tusc3
Peak_25252	chr15	101271461	101271963	503	3.32145	5.49747	323.201	4.60523e-14	5.14457e-11	Exon (uc007xsv.2/15370, exon 3 of 7)	15	101266846	101274794	7949	4615	ENSMUSG00000023034	Nr4a1
Peak_16980	chr13	34244068	34244594	527	4.10573	4.60138	303.742	4.63046e-14	5.14457e-11	Intron (uc007qbg.1/73102, intron 1 of 7)	13	34179158	34299151	119994	54557	ENSMUSG00000038267	Slc22a23
Peak_5456	chr1	194019225	194019687	463	3.74493	4.41746	303.019	4.74152e-14	5.14457e-11	Distal Intergenic	1	194212187	194222759	10573	203072	ENSMUSG00000103692	4930503O07Rik
Peak_43577	chr3	117586694	117587477	784	4.12198	4.67422	302.923	4.75661e-14	5.14457e-11	Intron (uc008rda.3/75769, intron 1 of 5)	3	117575227	117689508	114282	11467	ENSMUSG00000033342	Plppr5
Peak_31209	chr18	31953392	31954064	673	4.80211	5.16491	346.959	5.07799e-14	5.40767e-11	Intron (uc008eiv.1/225341, intron 4 of 9)	18	31942999	31949636	6638	-3756	ENSMUSG00000052229	Gpr17
Peak_27711	chr16	91305076	91306219	1144	3.6896	5.85108	364.562	5.40135e-14	5.66487e-11	Distal Intergenic	16	91269769	91271939	2171	35307	ENSMUSG00000046160	Olig1
Peak_26434	chr16	41179521	41180197	677	-4.03167	4.49031	292.965	6.63169e-14	6.85143e-11	Intron (uc007zfr.1/268890, intron 2 of 8)	16	41533342	42146213	612872	-353145	ENSMUSG00000061080	Lsamp
Peak_58692	chr7	73302423	73302990	568	3.73957	4.82236	291.911	6.87343e-14	6.99675e-11	Distal Intergenic	7	73310380	73315193	4814	-7390	ENSMUSG00000108530	4930429H19Rik
Peak_19600	chr14	10711975	10713193	1219	2.3624	5.7326	290.424	7.23083e-14	7.25388e-11	Intron (uc007sfk.2/14198, intron 3 of 8)	14	10738553	10779001	40449	-25360	ENSMUSG00000089833	Fhitos
Peak_13995	chr12	40468126	40468600	475	3.90065	4.6707	289.144	7.55494e-14	7.47075e-11	Intron (uc007nlc.1/238130, intron 1 of 5)	12	40446053	40846488	400436	22073	ENSMUSG00000035954	Dock4
Peak_57450	chr7	16499660	16500505	846	4.59415	4.83245	304.798	8.12804e-14	7.92426e-11	Intron (uc009fhw.1/232906, intron 5 of 6)	7	16455721	16476780	21060	-22880	ENSMUSG00000001988	Npas1
Peak_27612	chr16	89429435	89430188	754	-4.14024	4.74413	296.925	8.40036e-14	8.018e-11	Distal Intergenic	16	89419323	89420111	789	-9324	ENSMUSG00000062433	Krtap6-2
Peak_52969	chr5	146315167	146315983	817	3.33826	5.01572	285.608	8.53583e-14	8.018e-11	Distal Intergenic	5	146294910	146302874	7965	20257	ENSMUSG00000029635	Cdk8
Peak_19024	chr13	108301294	108301833	540	3.21617	4.87507	285.487	8.57169e-14	8.018e-11	Distal Intergenic	13	108316337	108389557	73221	-14504	ENSMUSG00000021697	Depdc1b
Peak_24179	chr15	68738070	68738655	586	3.87755	4.10023	283.956	9.04117e-14	8.3235e-11	Distal Intergenic	15	68928420	69094516	166097	-189765	ENSMUSG00000022332	Khdrbs3
Peak_24733	chr15	84403388	84404005	618	4.09499	4.21285	283.648	9.13877e-14	8.3235e-11	Intron (uc007xca.2/72301, intron 5 of 5)	15	84379203	84446545	67343	42540	ENSMUSG00000062760	1810041L15Rik
Peak_37579	chr2	96475564	96476156	593	3.55408	4.87405	280.977	1.00369e-13	9.02279e-11	Intron (uc008lhc.2/241568, intron 1 of 7)	2	96318169	97631664	1313496	157395	ENSMUSG00000050587	Lrrc4c
Peak_46714	chr4	59802217	59802645	429	5.02575	3.94177	280.595	1.01732e-13	9.02811e-11	Distal Intergenic	4	59805650	59904740	99091	-3005	ENSMUSG00000028385	Snx30
Peak_54902	chr6	70774201	70774991	791	3.7149	4.71496	278.757	1.08573e-13	9.43033e-11	Exon (uc009cfy.1/19895, exon 6 of 9)	6	70765720	70792175	26456	17184	ENSMUSG00000053604	Rpia
Peak_56117	chr6	113368440	113369106	667	4.31382	4.45784	278.422	1.09872e-13	9.43033e-11	Intron (uc009dfn.2/101206, intron 8 of 8)	6	113366657	113376945	10289	7839	ENSMUSG00000048930	Tada3
Peak_40334	chr3	9654209	9655221	1013	-4.00611	4.90486	297.394	1.10914e-13	9.43033e-11	Distal Intergenic	3	9427010	9610085	183076	-44124	ENSMUSG00000040209	Zfp704
Peak_1533	chr1	61302426	61303131	706	2.95297	5.04543	277.72	1.12652e-13	9.43033e-11	Distal Intergenic	1	61378432	61395904	17473	-75301	ENSMUSG00000085447	9530026F06Rik
Peak_39135	chr2	146710579	146711291	713	2.8676	5.25881	277.614	1.13077e-13	9.43033e-11	Distal Intergenic	2	146855889	146970089	114201	-144598	ENSMUSG00000074749	Kiz
Peak_14275	chr12	51001755	51002676	922	-1.86671	5.95278	277.064	1.15317e-13	9.50267e-11	Promoter (2-3kb)	12	51005156	51062543	57388	-2480	ENSMUSG00000111986	1700008C04Rik
Peak_62004	chr8	57013649	57014304	656	3.10614	4.83818	275.001	1.24167e-13	1.00762e-10	Distal Intergenic	8	57304414	57320859	16446	306555	ENSMUSG00000100510	Uph
Peak_62675	chr8	79145168	79146396	1229	3.31522	4.99222	274.48	1.26517e-13	1.00762e-10	Intron (uc009mih.2/622675, intron 8 of 14)	8	79118175	79193192	75018	26993	ENSMUSG00000071064	Zfp827
Peak_165	chr1	12000453	12000956	504	3.4504	4.52711	274.453	1.26644e-13	1.00762e-10	Distal Intergenic	1	11596151	11933740	337590	404302	ENSMUSG00000057715	A830018L16Rik
Peak_59173	chr7	90216385	90216928	544	3.12393	4.82618	273.619	1.3051e-13	1.02345e-10	Distal Intergenic	7	90223878	90265432	41555	48504	ENSMUSG00000030617	Ccdc83
Peak_52541	chr5	128336516	128337216	701	4.02704	4.25465	273.391	1.31591e-13	1.02345e-10	Intron (uc008zse.1/243274, intron 1 of 8)	5	127783491	128433077	649587	95861	ENSMUSG00000034310	Tmem132d
Peak_32301	chr18	63366823	63367379	557	3.72902	4.75501	272.566	1.35581e-13	1.04277e-10	Intron (uc012bea.2/667742, intron 1 of 53)	18	63010213	63387183	376971	19804	ENSMUSG00000041482	Piezo2
Peak_55855	chr6	103543738	103544408	671	3.95412	4.93765	287.145	1.44606e-13	1.09996e-10	Intron (uc009dcj.1/12661, intron 1 of 26)	6	103511330	103691677	180348	32408	ENSMUSG00000030077	Chl1
Peak_42889	chr3	97800571	97801097	527	4.69004	4.24553	270.449	1.46444e-13	1.10183e-10	Intron (uc012cuf.1/83679, intron 4 of 46)	3	97738844	97768014	29171	-32557	ENSMUSG00000038170	Pde4dip
Peak_40843	chr3	31165961	31167007	1047	2.93912	6.01664	312.169	1.50129e-13	1.11741e-10	Distal Intergenic	3	31149920	31164326	14407	16041	ENSMUSG00000037625	Cldn11
Peak_40184	chr2	181795470	181796245	776	4.45459	4.8255	286.135	1.54353e-13	1.13663e-10	Promoter (<=1kb)	2	181796307	181827775	31469	-62	ENSMUSG00000010505	Myt1
Peak_18955	chr13	107308457	107309673	1217	3.49873	5.86781	329.273	1.61171e-13	1.14344e-10	Distal Intergenic	13	107469822	107474432	4611	-160149	ENSMUSG00000114780	AI197445
Peak_37143	chr2	77686236	77686956	721	4.13208	4.53225	267.721	1.61865e-13	1.14344e-10	Intron (uc012bxu.2/241494, intron 1 of 7)	2	77410627	77703272	292646	16316	ENSMUSG00000027016	Zfp385b
Peak_5417	chr1	193150982	193151676	695	3.42831	4.59029	267.418	1.63685e-13	1.14344e-10	Promoter (1-2kb)	1	193153112	193166868	13757	-1436	ENSMUSG00000026638	Irf6
Peak_44087	chr3	130951204	130951679	476	4.81459	4.2321	267.407	1.63747e-13	1.14344e-10	Distal Intergenic	3	131110297	131224357	114061	-158618	ENSMUSG00000027985	Lef1
Peak_42459	chr3	85550958	85551836	879	3.27319	4.83628	267.219	1.64893e-13	1.14344e-10	Intron (uc008pqg.3/99889, intron 3 of 9)	3	85574129	85652833	78705	-22293	ENSMUSG00000028085	Gatb
Peak_39951	chr2	173419786	173420704	919	2.95117	5.04477	267.17	1.65189e-13	1.14344e-10	Distal Intergenic	2	173522592	173528502	5911	-101888	ENSMUSG00000027518	1700021F07Rik
Peak_3078	chr1	123995608	123996164	557	3.6645	4.40004	264.894	1.79742e-13	1.22462e-10	Intron (uc007cjx.2/269109, intron 1 of 25)	1	123332138	124045559	713422	49395	ENSMUSG00000036815	Dpp10
Peak_109	chr1	9611558	9612506	949	2.85172	5.21186	264.787	1.80456e-13	1.22462e-10	Intron (uc007agp.1/76982, intron 2 of 5)	1	9601267	9627142	25876	10291	ENSMUSG00000067879	3110035E14Rik
Peak_16133	chr13	6575576	6576397	822	3.55819	4.89734	266.7	1.85373e-13	1.24578e-10	Intron (uc007pjx.1/69617, intron 23 of 26)	13	6548157	6580149	31993	27419	ENSMUSG00000021193	Pitrm1
Peak_31477	chr18	38742436	38743052	617	4.07495	4.54501	263.292	1.90821e-13	1.27006e-10	Distal Intergenic	18	38838673	38866747	28075	123695	ENSMUSG00000036585	Fgf1
Peak_45748	chr4	22608771	22609570	800	3.48162	4.53411	259.621	2.19141e-13	1.44466e-10	Distal Intergenic	4	22490548	22493126	2579	118223	ENSMUSG00000107859	Gm30731
Peak_59059	chr7	83852037	83852784	748	4.29153	4.43256	257.698	2.35789e-13	1.53975e-10	Distal Intergenic	7	83880495	83884341	3847	31557	ENSMUSG00000070462	Tlnrd1
Peak_23030	chr15	27793231	27793778	548	3.42691	4.76667	256.014	2.51501e-13	1.61889e-10	Intron (uc007vjw.1/223435, intron 34 of 56)	15	27730649	27748551	17903	-44680	ENSMUSG00000022263	Trio
Peak_63055	chr8	90535720	90536739	1020	-4.4206	4.13398	255.521	2.56325e-13	1.61889e-10	Distal Intergenic	8	90247112	90348252	101141	-187468	ENSMUSG00000043668	Tox3
Peak_13379	chr12	16514955	16515977	1023	3.63606	5.42207	296.964	2.57148e-13	1.61889e-10	Distal Intergenic	12	16535669	16589770	54102	73793	ENSMUSG00000020593	Lpin1
Peak_46582	chr4	56375687	56376231	545	3.54325	4.56577	255.426	2.57263e-13	1.61889e-10	Distal Intergenic	4	56740005	56741425	1421	365194	ENSMUSG00000070980	Actl7b
Peak_30974	chr18	23680697	23681273	577	4.31582	4.3268	254.977	2.6175e-13	1.63228e-10	Distal Intergenic	18	23621958	23659719	37762	58739	ENSMUSG00000024302	Dtna
Peak_53649	chr6	21471679	21472595	917	-3.62344	4.46957	254.634	2.65239e-13	1.63373e-10	Intron (uc009baq.1/16508, intron 1 of 5)	6	21216109	21729805	513697	255570	ENSMUSG00000060882	Kcnd2
Peak_46448	chr4	52598632	52599193	562	-4.53294	4.22549	254.492	2.66702e-13	1.63373e-10	Promoter (2-3kb)	4	52596274	52612163	15890	2358	ENSMUSG00000028314	Toporsl
Peak_43622	chr3	119173645	119174204	560	3.99052	4.43875	253.649	2.7555e-13	1.65851e-10	Intron (uc008rdh.1/99586, intron 16 of 22)	3	119718742	119740744	22003	566540	ENSMUSG00000028134	Ptbp2
Peak_54939	chr6	71756810	71757747	938	3.31006	4.96591	256.558	2.76052e-13	1.65851e-10	Intron (uc009chc.2/52250, intron 2 of 6)	6	71707681	71810705	103025	49129	ENSMUSG00000052852	Reep1
Peak_55532	chr6	93140249	93141175	927	3.20644	5.05589	258.398	2.77936e-13	1.65851e-10	Intron (uc012epg.1/330385, intron 3 of 3)	6	92940582	93272977	332396	199667	ENSMUSG00000097462	9530026P05Rik
Peak_13367	chr12	16155867	16156956	1090	2.69203	5.14667	253.1	2.81487e-13	1.66535e-10	Distal Intergenic	12	15791727	15816785	25059	-339082	ENSMUSG00000020601	Trib2
Peak_30245	chr17	88325701	88326772	1072	2.47187	5.52236	251.419	3.00535e-13	1.76297e-10	Distal Intergenic	17	88440712	88478069	37358	-113940	ENSMUSG00000034998	Foxn2
Peak_27624	chr16	89813455	89813880	426	4.43615	3.83133	250.972	3.05843e-13	1.77903e-10	Intron (uc007zvs.2/21844, intron 1 of 12)	16	89787111	89818352	31242	4472	ENSMUSG00000002489	Tiam1
Peak_36977	chr2	71694587	71695352	766	3.63306	4.76733	251.816	3.19305e-13	1.82742e-10	Intron (uc056zne.1/100628577, intron 1 of 2)	2	71719417	71730966	11550	-24065	ENSMUSG00000064263	Platr26
Peak_58655	chr7	72100509	72101361	853	3.6416	4.70019	249.863	3.19442e-13	1.82742e-10	Intron (uc009hnp.1/244049, intron 20 of 22)	7	71947527	71962018	14492	-138491	ENSMUSG00000108480	Gm36633
Peak_47597	chr4	95023432	95024104	673	3.34914	4.38578	249.432	3.24906e-13	1.84344e-10	Distal Intergenic	4	95049036	95052222	3187	28118	ENSMUSG00000052684	Jun
Peak_43493	chr3	115900026	115900496	471	4.36038	4.16233	248.526	3.36729e-13	1.89499e-10	3' UTR	3	115888183	115929323	41141	11843	ENSMUSG00000033554	Dph5
Peak_33689	chr19	21742003	21742894	892	3.47321	5.19996	267.916	3.48099e-13	1.94318e-10	Distal Intergenic	19	21778340	21798694	20355	-35446	ENSMUSG00000024754	Tmem2
Peak_53377	chr6	11306023	11306783	761	3.39911	4.67922	246.426	3.65972e-13	2.02661e-10	Distal Intergenic	6	10971468	10974378	2911	-331645	NA	AA545190
Peak_50305	chr5	38499139	38499879	741	2.93939	5.42433	259.842	3.77607e-13	2.07444e-10	Promoter (2-3kb)	5	38349273	38502152	152880	2273	ENSMUSG00000005107	Slc2a9
Peak_90	chr1	8496080	8496825	746	-4.14576	3.95292	245.214	3.84106e-13	2.08382e-10	Intron (uc007agh.2/71096, intron 15 of 20)	1	8359739	8470519	110781	-25561	ENSMUSG00000025909	Sntg1
Peak_11244	chr11	62106215	62107029	815	3.16358	4.73016	245.134	3.85334e-13	2.08382e-10	Intron (uc007jim.1/432572, intron 3 of 3)	11	62077024	62223013	145990	29191	ENSMUSG00000042331	Specc1
Peak_31891	chr18	52601334	52602015	682	3.92107	4.57591	245.281	3.95373e-13	2.12153e-10	Distal Intergenic	18	52615915	52639830	23916	-13900	ENSMUSG00000046886	Zfp474
Peak_33929	chr19	28896422	28897492	1071	3.01156	4.98134	244.194	4.00135e-13	2.13057e-10	Promoter (<=1kb)	19	28895793	28913960	18168	629	ENSMUSG00000024935	Slc1a1
Peak_24942	chr15	91965048	91965673	626	3.32716	4.59781	243.863	4.05493e-13	2.14261e-10	Intron (uc007xih.1/12805, intron 1 of 2)	15	91949540	92139465	189926	15508	ENSMUSG00000055022	Cntn1
Peak_50901	chr5	63871919	63872811	893	2.50461	5.2911	243.368	4.13651e-13	2.16916e-10	Intron (uc008xmg.1/76261, intron 1 of 3)	5	63812495	63899619	87125	59424	ENSMUSG00000060512	0610040J01Rik
Peak_16274	chr13	13481014	13481480	467	3.0866	4.87148	243.144	4.17403e-13	2.17238e-10	Intron (uc007pmf.2/18073, intron 7 of 13)	13	13437602	13512275	74674	43412	ENSMUSG00000005397	Nid1
Peak_57228	chr6	147053846	147054560	715	-4.28323	4.07783	242.759	4.2394e-13	2.17849e-10	Intron (uc009ess.1/232536, intron 4 of 7)	6	147042770	147070902	28133	11076	ENSMUSG00000040112	Mrps35
Peak_56589	chr6	127444107	127444822	716	-4.6896	3.98477	242.705	4.24872e-13	2.17849e-10	Promoter (2-3kb)	6	127446840	127494239	47400	-2018	ENSMUSG00000037997	Parp11
Peak_21294	chr14	75980900	75981612	713	4.72418	4.59889	256.255	4.3134e-13	2.19539e-10	Intron (uc007urb.1/68705, intron 4 of 7)	14	75955003	75965217	10215	25897	ENSMUSG00000046523	Kctd4
Peak_39152	chr2	147180541	147181207	667	3.51313	5.03786	255.371	4.45824e-13	2.25255e-10	Promoter (2-3kb)	2	147184083	147331681	147599	-2876	ENSMUSG00000086509	Nkx2-2os
Peak_22313	chr14	120732314	120733105	792	2.97742	4.88435	241.018	4.54921e-13	2.26949e-10	Distal Intergenic	14	120911194	120927604	16411	-178089	ENSMUSG00000030662	Ipo5
Peak_4659	chr1	170812097	170812735	639	5.11174	4.10556	240.974	4.55734e-13	2.26949e-10	Intron (uc007dmj.1/226641, intron 9 of 15)	1	170704457	170867771	163315	55036	ENSMUSG00000026663	Atf6
Peak_4160	chr1	157937794	157938380	587	-3.68704	4.27711	240.49	4.64788e-13	2.29804e-10	Distal Intergenic	1	157535852	157562189	26338	401942	ENSMUSG00000026589	Sec16b
Peak_38379	chr2	123799279	123800395	1117	-4.11047	4.64373	254.378	4.70991e-13	2.3122e-10	Distal Intergenic	2	124089969	124667789	577821	-289574	ENSMUSG00000027200	Sema6d
Peak_56740	chr6	134211826	134212233	408	4.4643	4.07744	239.657	4.80871e-13	2.34408e-10	Intron (uc009eke.2/14011, intron 2 of 7)	6	134035700	134270147	234448	176126	ENSMUSG00000030199	Etv6
Peak_47972	chr4	106597064	106597624	561	4.42386	3.96944	237.967	5.15356e-13	2.49461e-10	Intron (uc012dhz.1/242602, intron 9 of 9)	4	106590909	106617238	26330	19614	ENSMUSG00000054362	Lexm
Peak_11368	chr11	67518853	67519504	652	3.4687	4.6423	237.435	5.26768e-13	2.52067e-10	Distal Intergenic	11	67532998	67688992	155995	-13494	ENSMUSG00000033066	Gas7
Peak_7455	chr10	67798811	67799706	896	3.55465	4.53999	237.377	5.28022e-13	2.52067e-10	Distal Intergenic	10	67886105	67901337	15233	101631	ENSMUSG00000037855	Zfp365
Peak_67155	chr9	113171794	113172427	634	3.86997	4.3304	236.861	5.39397e-13	2.54112e-10	Distal Intergenic	9	113496746	113587152	90407	414725	ENSMUSG00000109890	AU023762
Peak_34744	chr19	59043590	59044470	881	-3.42889	4.49321	236.849	5.39648e-13	2.54112e-10	Intron (uc008ibd.1/71653, intron 3 of 14)	19	59007709	59038390	30682	-5200	ENSMUSG00000041362	Shtn1
Peak_63620	chr8	111828435	111828995	561	5.25355	4.05113	236.47	5.48166e-13	2.56379e-10	Intron (uc009nmx.1/23837, intron 5 of 6)	8	111768473	111854310	85838	25315	ENSMUSG00000031954	Cfdp1
Peak_21354	chr14	77593302	77594146	845	-3.19438	4.87025	241.116	5.54752e-13	2.57056e-10	3' UTR	14	77479483	77506868	27386	-86434	ENSMUSG00000067973	Gm6994
Peak_34838	chr2	4529147	4529788	642	3.2502	4.62558	236.082	5.57041e-13	2.57056e-10	Intron (uc008ieo.2/209630, intron 7 of 22)	2	4559754	4588179	28426	-29966	ENSMUSG00000026657	Frmd4a
Peak_17127	chr13	39343562	39344385	824	3.5833	4.11105	235.636	5.67439e-13	2.6012e-10	Distal Intergenic	13	38932140	38960875	28736	-382687	ENSMUSG00000021432	Slc35b3
Peak_27221	chr16	73244843	73245578	736	-3.61187	4.49807	235.096	5.8032e-13	2.62286e-10	Distal Intergenic	16	72978560	73003710	25151	266283	ENSMUSG00000022883	Robo1
Peak_61021	chr8	18939697	18940114	418	5.03177	3.58317	235.016	5.82269e-13	2.62286e-10	Intron (uc033jep.1/319581, intron 4 of 6)	8	18932729	18950871	18143	10757	ENSMUSG00000039814	Xkr5
Peak_47525	chr4	89650673	89651544	872	2.77385	5.00017	234.964	5.8353e-13	2.62286e-10	Distal Intergenic	4	89688198	89694766	6569	-36654	ENSMUSG00000043753	Dmrta1
Peak_47648	chr4	96545826	96546487	662	3.52617	4.57768	234.317	5.99471e-13	2.66374e-10	Exon (uc008tti.2/13110, exon 2 of 9)	4	96516138	96553651	37514	7164	ENSMUSG00000052914	Cyp2j6
Peak_18403	chr13	91296559	91297503	945	-3.2578	4.60669	234.283	6.00323e-13	2.66374e-10	Distal Intergenic	13	90935349	91223987	288639	-72572	ENSMUSG00000021619	Atg10
Peak_48141	chr4	111691036	111691645	610	3.06167	4.81418	233.504	6.20182e-13	2.73433e-10	Distal Intergenic	4	111720010	111807054	87045	-28365	ENSMUSG00000034401	Spata6
Peak_23775	chr15	56420420	56421118	699	3.76144	4.41231	232.694	6.416e-13	2.81086e-10	Distal Intergenic	15	56689944	56694460	4517	-268826	ENSMUSG00000086541	Has2os
Peak_6674	chr10	39672355	39673164	810	2.45438	5.3581	232.524	6.46176e-13	2.8131e-10	Intron (uc007ewb.2/327744, intron 2 of 2)	10	39621411	39732007	110597	58843	ENSMUSG00000087177	E130307A14Rik
Peak_7615	chr10	73826167	73826869	703	2.96388	5.07944	234.857	6.62455e-13	2.86594e-10	Intron (uc007fpe.1/11994, intron 3 of 13)	10	73821867	74649732	827866	4300	ENSMUSG00000052613	Pcdh15
Peak_43321	chr3	108465937	108466738	802	4.25371	4.83593	256.092	6.84357e-13	2.94231e-10	Intron (uc008qzd.1/229722, intron 13 of 20)	3	108434397	108445259	10863	-20678	ENSMUSG00000068739	Sars
Peak_31744	chr18	46637738	46638902	1165	2.36818	5.86193	243.598	6.99578e-13	2.98919e-10	Distal Intergenic	18	46597704	46610225	12522	40034	ENSMUSG00000057561	Eif1a
Peak_26757	chr16	51937283	51937799	517	3.99756	4.30917	230.466	7.0479e-13	2.99298e-10	Distal Intergenic	16	52031549	52050905	19357	-93750	ENSMUSG00000022637	Cblb
Peak_62674	chr8	79102735	79103442	708	3.37484	4.46823	230.162	7.13945e-13	3.00896e-10	Intron (uc009mih.2/622675, intron 5 of 14)	8	79118175	79193192	75018	-14733	ENSMUSG00000071064	Zfp827
Peak_1097	chr1	44584834	44585692	859	3.19646	4.72027	230.053	7.17246e-13	3.00896e-10	Intron (uc007awl.2/70676, intron 1 of 9)	1	44551671	44796836	245166	33163	ENSMUSG00000056870	Gulp1
Peak_43704	chr3	121706570	121707412	843	3.84038	4.48874	229.19	7.44022e-13	3.10248e-10	Distal Intergenic	3	121723537	121735052	11516	-16125	ENSMUSG00000028128	F3
Peak_16004	chr12	118021770	118022301	532	3.84086	4.24366	228.73	7.58767e-13	3.14502e-10	Intron (uc007pie.1/13411, intron 45 of 81)	12	117877982	117933886	55905	-87884	ENSMUSG00000018581	Dnah11
Peak_2561	chr1	94020107	94020608	502	4.00564	4.0347	227.973	7.83715e-13	3.21979e-10	Promoter (<=1kb)	1	94020493	94028330	7838	0	ENSMUSG00000034000	Neu4
Peak_4539	chr1	167588991	167589800	810	4.62316	4.08088	227.901	7.8611e-13	3.21979e-10	Distal Intergenic	1	167598362	167639623	41262	-8562	ENSMUSG00000015843	Rxrg
Peak_2438	chr1	89606591	89607251	661	3.50901	4.33194	227.419	8.02504e-13	3.25957e-10	Intron (uc007byw.1/347722, intron 2 of 17)	1	89627753	89895282	267530	-20502	ENSMUSG00000055013	Agap1
Peak_20015	chr14	27367091	27367631	541	4.42536	4.15408	227.244	8.08553e-13	3.25957e-10	Intron (uc007sto.2/71704, intron 6 of 13)	14	27361389	27403911	42523	5702	ENSMUSG00000021895	Arhgef3
Peak_42394	chr3	83979998	83980842	845	-2.13163	5.28176	227.19	8.10447e-13	3.25957e-10	Intron (uc008ppp.1/229473, intron 3 of 34)	3	83898287	83960797	62511	-19201	ENSMUSG00000033767	Tmem131l
Peak_18335	chr13	89607063	89608055	993	2.65039	5.13492	227.032	8.15968e-13	3.25957e-10	Exon (uc007rjf.2/12950, exon 5 of 5)	13	89540636	89611832	71197	66427	ENSMUSG00000021613	Hapln1
Peak_60741	chr8	9423463	9423977	515	3.64251	3.84005	226.935	8.19367e-13	3.25957e-10	Intron (uc009kuj.1/270028, intron 1 of 2)	8	9206010	9323369	117360	-100094	ENSMUSG00000079157	Fam155a
Peak_61634	chr8	41175126	41175583	458	3.26636	4.56288	226.12	8.48601e-13	3.35658e-10	Distal Intergenic	8	41191434	41215156	23723	39573	ENSMUSG00000031594	Fgl1
Peak_9114	chr10	117162594	117163114	521	3.72489	4.21901	225.918	8.56015e-13	3.36075e-10	Distal Intergenic	10	117082805	117148474	65670	-14120	ENSMUSG00000020170	Frs2
Peak_13515	chr12	26386936	26387316	381	4.27921	3.76462	225.828	8.59365e-13	3.36075e-10	Intron (uc007nff.2/108089, intron 3 of 9)	12	26414901	26415010	110	27694	ENSMUSG00000098771	Mir6538
Peak_57913	chr7	40884821	40885433	613	3.36994	4.64816	225.594	8.68072e-13	3.37573e-10	Intron (uc009glg.2/320210, intron 1 of 4)	7	40849153	40898324	49172	12891	ENSMUSG00000100600	A230077H06Rik
Peak_17097	chr13	37862462	37862933	472	3.51287	4.4614	225.12	8.86074e-13	3.42648e-10	Intron (uc007qcw.2/68750, intron 1 of 9)	13	37888434	37952005	63572	-25501	ENSMUSG00000039087	Rreb1
Peak_31458	chr18	38384853	38385381	529	3.4259	4.50614	224.433	9.12849e-13	3.51041e-10	Distal Intergenic	18	38418975	38464406	45432	-33594	ENSMUSG00000024425	Ndfip1
Peak_5828	chr10	13044644	13045099	456	-3.60575	4.09174	224.054	9.27991e-13	3.54848e-10	Distal Intergenic	10	13060504	13128996	68493	-15405	ENSMUSG00000019817	Plagl1
Peak_41733	chr3	61234926	61235494	569	4.02506	4.28849	223.93	9.33002e-13	3.54848e-10	Distal Intergenic	3	61364507	61368703	4197	-129013	ENSMUSG00000036894	Rap2b
Peak_23185	chr15	32610796	32611653	858	3.33168	4.90679	233.616	9.505e-13	3.59528e-10	Intron (uc007vkq.1/20356, intron 12 of 12)	15	32601675	32696341	94667	9121	ENSMUSG00000022231	Sema5a
Peak_6509	chr10	32881888	32882497	610	2.42368	4.99601	223.37	9.56043e-13	3.59659e-10	Intron (uc007etw.2/432450, intron 1 of 6)	10	31689319	32889915	1200597	7418	ENSMUSG00000069670	Nkain2
Peak_50418	chr5	43103511	43104205	695	3.29368	4.80572	225.905	9.65651e-13	3.6131e-10	Distal Intergenic	5	43233463	43237919	4457	-129258	ENSMUSG00000039782	Cpeb2
Peak_49667	chr5	17647576	17648196	621	2.97805	4.59498	222.72	9.83554e-13	3.64307e-10	Intron (uc008wnl.1/20348, intron 2 of 17)	5	17694202	17730267	36066	-46006	ENSMUSG00000028780	Sema3c
Peak_21756	chr14	99593587	99594244	658	3.82032	4.19623	222.705	9.84186e-13	3.64307e-10	Distal Intergenic	14	99298691	99313409	14719	294896	ENSMUSG00000005148	Klf5
Peak_18428	chr13	91996792	91997636	845	-3.48468	4.38542	222.403	9.97284e-13	3.67191e-10	Distal Intergenic	13	91959715	91988042	28328	-8750	ENSMUSG00000021708	Rasgrf2
Peak_47960	chr4	106232366	106233093	728	2.88092	5.00249	222.368	1.00551e-12	3.68261e-10	Distal Intergenic	4	106316213	106360883	44671	-83120	ENSMUSG00000028514	Usp24
Peak_25025	chr15	94684178	94684830	653	3.75039	4.30485	221.478	1.03858e-12	3.76587e-10	Intron (uc007xjm.1/320709, intron 2 of 2)	15	94629185	95096097	466913	54993	ENSMUSG00000063296	Tmem117
Peak_65523	chr9	57468867	57469369	503	3.55274	4.10157	221.466	1.03912e-12	3.76587e-10	Promoter (<=1kb)	9	57441327	57468060	26734	-807	ENSMUSG00000040722	Scamp5
Peak_41621	chr3	57918969	57919824	856	-3.42611	4.75869	232.796	1.05864e-12	3.81663e-10	Distal Intergenic	3	57841895	57847757	5863	-71212	ENSMUSG00000027805	Pfn2
Peak_25024	chr15	94651964	94652990	1027	3.6828	5.07441	248.421	1.07783e-12	3.85473e-10	Intron (uc007xjm.1/320709, intron 2 of 2)	15	94629185	95096097	466913	22779	ENSMUSG00000063296	Tmem117
Peak_38659	chr2	132593376	132594006	631	4.07077	3.65844	220.502	1.08413e-12	3.85473e-10	Distal Intergenic	2	132598196	132650604	52409	-4190	ENSMUSG00000074783	AU019990
Peak_56390	chr6	121099320	121099857	538	3.55158	4.13625	220.389	1.0896e-12	3.85473e-10	Intron (uc009dnw.2/194401, intron 1 of 31)	6	121016647	121110094	93448	10237	ENSMUSG00000051586	Mical3
Peak_5651	chr10	8339590	8340423	834	2.96036	4.34089	220.349	1.09149e-12	3.85473e-10	Intron (uc007eit.1/338362, intron 2 of 7)	10	8204753	8302242	97490	-37348	ENSMUSG00000047712	Ust
Peak_13919	chr12	38596264	38596902	639	3.15185	4.92472	226.945	1.10238e-12	3.87342e-10	Intron (uc007nkj.1/217480, intron 22 of 24)	12	38552809	38614521	61713	17619	ENSMUSG00000112967	4930428E07Rik
Peak_26384	chr16	38860504	38861023	520	-4.85023	3.93757	219.975	1.10967e-12	3.87936e-10	Distal Intergenic	16	38824331	38828749	4419	-31755	ENSMUSG00000022798	4930435E12Rik
Peak_11231	chr11	61528963	61529859	897	2.94393	4.58479	219.468	1.13485e-12	3.92335e-10	Intron (uc007jhv.2/13855, intron 6 of 9)	11	61505172	61512927	7756	23791	ENSMUSG00000001039	B9d1
Peak_5314	chr1	189731630	189732380	751	3.90151	4.51904	222.102	1.13806e-12	3.92335e-10	Intron (uc007eas.1/19250, intron 1 of 9)	1	189728268	189876693	148426	3362	ENSMUSG00000026604	Ptpn14
Peak_9382	chr10	125372640	125373094	455	3.71298	4.03231	219.381	1.13926e-12	3.92335e-10	Distal Intergenic	10	125227485	125328535	101051	-44105	ENSMUSG00000020102	Slc16a7
Peak_27704	chr16	91233175	91234034	860	3.57574	5.11721	246.8	1.14496e-12	3.92349e-10	Distal Intergenic	16	91225550	91228677	3128	7625	ENSMUSG00000039830	Olig2
Peak_1566	chr1	62743114	62743845	732	3.26101	4.63566	218.686	1.17495e-12	4.00641e-10	Intron (uc007bfj.1/18187, intron 3 of 15)	1	62768969	62797091	28123	-25124	ENSMUSG00000025969	Nrp2
Peak_32907	chr18	82549503	82550022	520	3.85401	4.12486	218.449	1.18737e-12	4.01936e-10	Intron (uc008ftr.1/17196, intron 3 of 3)	18	82554320	82585637	31318	-4298	ENSMUSG00000041607	Mbp
Peak_7896	chr10	80857314	80857732	419	4.16922	3.86106	218.393	1.19036e-12	4.01936e-10	Promoter (<=1kb)	10	80857121	80868708	11588	193	ENSMUSG00000035206	Sppl2b
Peak_23731	chr15	55125448	55125948	501	4.37777	3.9843	217.872	1.21831e-12	4.09376e-10	Intron (uc007vsb.2/97998, intron 1 of 8)	15	55133436	55259273	125838	-7488	ENSMUSG00000022419	Deptor
Peak_10042	chr11	20232262	20232740	479	3.69878	4.12739	217.603	1.23302e-12	4.12316e-10	Intron (uc007icw.1/216543, intron 5 of 6)	11	20238386	20242246	3861	9506	ENSMUSG00000044066	Cep68
Peak_42467	chr3	85927987	85928631	645	3.88997	4.80176	235.043	1.24507e-12	4.13252e-10	Distal Intergenic	3	84496093	85887518	1391426	-40469	ENSMUSG00000074513	Arfip1
Peak_16503	chr13	20353840	20355015	1176	-1.62205	5.99766	217.337	1.24775e-12	4.13252e-10	Intron (uc007ppn.3/140580, intron 14 of 21)	13	20472990	20592444	119455	-117975	ENSMUSG00000041112	Elmo1
Peak_58568	chr7	68907850	68909117	1268	3.29349	5.75016	265.033	1.27009e-12	4.16162e-10	Distal Intergenic	7	68741593	68749238	7646	-158612	ENSMUSG00000042659	Arrdc4
Peak_3103	chr1	125639336	125640197	862	-2.98258	4.43804	216.894	1.27269e-12	4.16162e-10	Distal Intergenic	1	125676996	125873861	196866	-36799	ENSMUSG00000026343	Gpr39
Peak_9727	chr11	7466022	7466796	775	3.54907	4.62503	219.514	1.27458e-12	4.16162e-10	Distal Intergenic	11	7206091	7213923	7833	-252099	ENSMUSG00000020427	Igfbp3
Peak_58623	chr7	70660106	70660653	548	3.88679	4.70412	228.6	1.30157e-12	4.2298e-10	Distal Intergenic	7	70351950	70366746	14797	-293360	ENSMUSG00000030551	Nr2f2
Peak_29736	chr17	72925458	72926644	1187	2.09988	6.01557	223.069	1.33414e-12	4.31539e-10	Intron (uc008dng.2/77889, intron 2 of 2)	17	72918305	72941946	23642	7153	ENSMUSG00000024063	Lbh
Peak_14306	chr12	52138144	52138862	719	-3.61674	4.48317	217.686	1.38176e-12	4.44863e-10	Intron (uc007nng.2/76826, intron 4 of 4)	12	52097746	52310959	213214	40398	ENSMUSG00000035142	Nubpl
Peak_46780	chr4	63228922	63229553	632	2.71806	4.65545	214.82	1.39715e-12	4.46914e-10	Intron (uc008tfr.1/373864, intron 3 of 15)	4	63234286	63334990	100705	-4733	ENSMUSG00000045672	Col27a1
Peak_27411	chr16	79176834	79177909	1076	2.54448	5.4405	222.589	1.40176e-12	4.46914e-10	Distal Intergenic	16	78953008	79091097	138090	-85737	ENSMUSG00000022857	Tmprss15
Peak_14525	chr12	58429341	58430299	959	3.32404	4.93855	226.464	1.4075e-12	4.46914e-10	Distal Intergenic	12	58264720	58269258	4539	-160083	ENSMUSG00000045930	Clec14a
Peak_398	chr1	20724627	20725227	601	3.59072	3.83063	214.215	1.43592e-12	4.53856e-10	Distal Intergenic	1	20730905	20734496	3592	-5678	ENSMUSG00000025929	Il17a
Peak_22183	chr14	117725652	117726083	432	3.40305	3.97853	213.938	1.45408e-12	4.55478e-10	Intron (uc007uyk.2/23888, intron 4 of 9)	14	117953743	117953847	105	227764	ENSMUSG00000098648	Mir6239
Peak_62067	chr8	58372038	58372808	771	-3.42259	4.40115	213.931	1.45451e-12	4.55478e-10	Intron (uc012gea.2/270049, intron 4 of 11)	8	58698849	58700796	1948	327988	NA	Gm15881
Peak_50821	chr5	55355411	55355953	543	3.2845	4.1117	213.836	1.46079e-12	4.55478e-10	Distal Intergenic	5	54349992	54358542	8551	1005419	ENSMUSG00000105912	Gm10440
Peak_23333	chr15	37498879	37499776	898	3.86431	4.52813	217.39	1.48355e-12	4.60499e-10	Intron (uc011zsg.1/52589, intron 4 of 6)	15	37366175	37459382	93208	-39497	ENSMUSG00000051359	Ncald
Peak_34185	chr19	37275750	37276376	627	4.39929	3.71154	213.058	1.51335e-12	4.63871e-10	Intron (uc008hil.1/15925, intron 21 of 23)	19	37258426	37264095	5670	-11655	NA	4931408D14Rik
Peak_14589	chr12	64832288	64833100	813	3.30831	4.99185	225.377	1.51933e-12	4.63871e-10	Distal Intergenic	12	64917911	64924591	6681	-84811	ENSMUSG00000047227	Gm527
Peak_1701	chr1	66643751	66644268	518	4.49844	3.82325	212.942	1.5214e-12	4.63871e-10	Intron (uc007bih.2/329178, intron 42 of 64)	1	66679564	66699148	19585	-35296	ENSMUSG00000055567	Unc80
Peak_18540	chr13	95080918	95081564	647	3.11701	4.20291	212.83	1.52917e-12	4.63871e-10	Intron (uc007rmb.2/218461, intron 7 of 18)	13	95024105	95034386	10282	-46532	ENSMUSG00000021684	Pde8b
Peak_14609	chr12	65413064	65414132	1069	2.85089	5.12961	219.843	1.53355e-12	4.63871e-10	Distal Intergenic	12	65225517	65228454	2938	187547	ENSMUSG00000035560	Wdr20rt
Peak_54715	chr6	60709901	60710695	795	2.26318	5.29381	212.752	1.53462e-12	4.63871e-10	Distal Intergenic	6	60731573	60829004	97432	118309	ENSMUSG00000025889	Snca
Peak_53548	chr6	17214730	17215359	630	3.22232	4.31418	212.572	1.54725e-12	4.65655e-10	Distal Intergenic	6	17198107	17210152	12046	16623	ENSMUSG00000085171	D830026I12Rik
Peak_1167	chr1	51216234	51216815	582	-2.68162	4.6286	212.408	1.55884e-12	4.6688e-10	Downstream (1-2kb)	1	51289126	51302960	13835	-72311	ENSMUSG00000045954	Cavin2
Peak_10018	chr11	19599363	19599845	483	3.95186	4.67634	225.315	1.56481e-12	4.6688e-10	Distal Intergenic	11	19924442	20019086	94645	-324597	ENSMUSG00000045671	Spred2
Peak_18324	chr13	89145995	89147098	1104	2.58468	5.03883	211.883	1.59673e-12	4.74358e-10	Intron (uc007rjd.2/13612, intron 6 of 10)	13	88821472	89323225	501754	324523	ENSMUSG00000034488	Edil3
Peak_67571	chrX	11655029	11655889	861	3.84305	4.32415	211.089	1.6559e-12	4.89836e-10	Distal Intergenic	20	11327822	11328151	330	327207	ENSMUSG00000069038	H2al1j
Peak_43581	chr3	117648517	117649029	513	3.82545	4.20121	210.851	1.67411e-12	4.93113e-10	Intron (uc008rda.3/75769, intron 3 of 5)	3	117575227	117689508	114282	73290	ENSMUSG00000033342	Plppr5
Peak_23586	chr15	48569621	48570450	830	-3.08126	4.57376	210.692	1.68638e-12	4.93549e-10	Intron (uc007vqu.2/239420, intron 3 of 70)	15	47580638	48791989	1211352	221539	ENSMUSG00000022311	Csmd3
Peak_41630	chr3	58135672	58136448	777	-3.05682	4.42803	210.647	1.68985e-12	4.93549e-10	Distal Intergenic	3	58141707	58163807	22101	27359	ENSMUSG00000100666	1700007F19Rik
Peak_30543	chr18	9399919	9400778	860	2.49325	5.13843	210.447	1.70547e-12	4.95379e-10	Intron (uc008eai.1/67974, intron 1 of 9)	18	9314044	9450150	136107	49372	ENSMUSG00000024286	Ccny
Peak_8471	chr10	96747239	96747997	759	-4.1914	4.69725	237.614	1.71043e-12	4.95379e-10	Distal Intergenic	10	96617001	96622811	5811	130238	ENSMUSG00000036478	Btg1
Peak_43492	chr3	115899396	115899831	436	4.64415	4.05991	210.224	1.72311e-12	4.96975e-10	Exon (uc008rbr.1/69740, exon 4 of 4)	3	115888183	115929323	41141	11213	ENSMUSG00000033554	Dph5
Peak_8958	chr10	111665793	111666570	778	2.94178	4.92825	212.205	1.7669e-12	5.07488e-10	Distal Intergenic	10	111586719	111594273	7555	-71520	ENSMUSG00000097082	4933440J02Rik
Peak_2598	chr1	96410799	96411628	830	-3.49213	4.02445	209.301	1.79814e-12	5.14328e-10	Distal Intergenic	1	96612057	96662573	50517	250945	ENSMUSG00000100589	4930533P14Rik
Peak_4448	chr1	165619175	165619825	651	4.31599	3.88461	209.142	1.81139e-12	5.15985e-10	Intron (uc007djh.1/68481, intron 1 of 5)	1	165592181	165634541	42361	14716	ENSMUSG00000026566	Mpzl1
Peak_53095	chr5	150337576	150338210	635	4.36196	4.05384	208.432	1.87205e-12	5.31079e-10	Intron (uc009ats.1/320365, intron 3 of 6)	5	150295388	150390858	95471	42188	ENSMUSG00000056602	Fry
Peak_39983	chr2	174226157	174226972	816	3.76336	4.01191	208.15	1.8967e-12	5.3234e-10	Distal Intergenic	2	174267047	174267125	79	40153	ENSMUSG00000065521	Mir296
Peak_30819	chr18	17383088	17383964	877	-3.06759	4.25503	208.101	1.90103e-12	5.3234e-10	Distal Intergenic	18	17234483	17235482	1000	-147606	NA	4921533I20Rik
Peak_36059	chr2	45032111	45032744	634	-3.05362	4.07517	208.051	1.90542e-12	5.3234e-10	Intron (uc008jpc.2/24136, intron 1 of 8)	2	45023100	45023177	78	-8934	ENSMUSG00000092679	Mir5129
Peak_3587	chr1	136455625	136456711	1087	2.50604	5.19629	208.031	1.90726e-12	5.3234e-10	Distal Intergenic	1	136467848	136530819	62972	-11137	ENSMUSG00000041498	Kif14
Peak_61406	chr8	33625815	33626363	549	3.42379	4.55636	207.4	1.96415e-12	5.45328e-10	Exon (uc009lke.1/108159, exon 6 of 8)	8	33619586	33641976	22391	15613	ENSMUSG00000052906	Ubxn8
Peak_11984	chr11	90094678	90095487	810	3.46867	4.55105	207.452	1.97204e-12	5.45328e-10	Distal Intergenic	11	90030348	90036505	6158	64330	ENSMUSG00000069763	Tmem100
Peak_56754	chr6	134537465	134538120	656	3.18473	4.61341	207.255	1.97742e-12	5.45328e-10	Intron (uc009ekl.2/16974, intron 2 of 22)	6	134446478	134566913	120436	28793	ENSMUSG00000030201	Lrp6
Peak_27565	chr16	87463812	87464381	570	4.71682	4.30215	217.699	2.03261e-12	5.58322e-10	Intron (uc007zuj.2/74112, intron 3 of 6)	16	87472081	87483513	11433	-7700	ENSMUSG00000025616	Usp16
Peak_545	chr1	24244952	24245323	372	3.64231	3.93738	206.409	2.05728e-12	5.62866e-10	Intron (uc007amo.2/12839, intron 37 of 37)	1	24195203	24252738	57536	49749	ENSMUSG00000026147	Col9a1
Peak_42374	chr3	83234037	83234897	861	3.38826	4.50453	206.083	2.08897e-12	5.68409e-10	Distal Intergenic	3	83055538	83072291	16754	178499	ENSMUSG00000027998	Plrg1
Peak_62743	chr8	80852448	80853159	712	3.57296	4.42101	206.032	2.09397e-12	5.68409e-10	Intron (uc009mjb.2/14388, intron 1 of 9)	8	80764431	80880519	116089	27360	ENSMUSG00000031714	Gab1
Peak_38726	chr2	134717847	134718475	629	3.46457	4.29571	205.508	2.14613e-12	5.76662e-10	Distal Intergenic	2	134786164	134989373	203210	-67689	ENSMUSG00000051177	Plcb1
Peak_60841	chr8	11896116	11896927	812	-3.78063	4.11976	205.506	2.14633e-12	5.76662e-10	Distal Intergenic	8	11840521	11855761	15241	55595	ENSMUSG00000031512	Tex29
Peak_33711	chr19	22317296	22317754	459	3.79904	3.84245	205.446	2.15238e-12	5.76662e-10	Intron (uc008gzj.1/226025, intron 1 of 25)	19	22448208	22989882	541675	-130454	ENSMUSG00000052387	Trpm3
Peak_16982	chr13	34278373	34279376	1004	3.10845	5.23463	226.333	2.15769e-12	5.76662e-10	Intron (uc007qbg.1/73102, intron 1 of 7)	13	34179158	34299151	119994	19775	ENSMUSG00000038267	Slc22a23
Peak_46735	chr4	62492526	62493096	571	4.98609	4.24981	216.116	2.17762e-12	5.79749e-10	Intron (uc008tew.1/192120, intron 4 of 6)	4	62499054	62502200	3147	9104	ENSMUSG00000038422	Hdhd3
Peak_14318	chr12	52429603	52430574	972	3.26611	5.38718	237.976	2.19105e-12	5.8109e-10	Distal Intergenic	12	52503972	52545639	41668	-73398	ENSMUSG00000035133	Arhgap5
Peak_60704	chr8	8391309	8391836	528	-3.23821	4.11384	204.572	2.24298e-12	5.92592e-10	Intron (uc009kuc.1/uc009kuc.1, intron 2 of 5)	8	8617439	8660773	43335	268937	ENSMUSG00000001300	Efnb2
Peak_24354	chr15	74523594	74524059	466	3.65419	3.97642	203.793	2.32715e-12	6.12224e-10	Intron (uc011zua.1/107831, intron 1 of 5)	15	74516196	74589464	73269	7398	ENSMUSG00000034730	Adgrb1
Peak_65885	chr9	72375040	72375466	427	-4.23784	3.34322	203.722	2.33498e-12	6.12224e-10	Distal Intergenic	9	72360202	72363771	3570	14838	ENSMUSG00000038535	Zfp280d
Peak_44949	chr3	152735504	152736062	559	4.27586	3.99828	203.381	2.37311e-12	6.19875e-10	Promoter (2-3kb)	3	152738186	152789013	50828	-2124	ENSMUSG00000039047	Pigk
Peak_67159	chr9	113411450	113412090	641	-4.22292	3.77471	203.112	2.4036e-12	6.25478e-10	Distal Intergenic	9	113496746	113587152	90407	175062	ENSMUSG00000109890	AU023762
Peak_33696	chr19	21789659	21790404	746	-3.41138	4.09285	202.878	2.4305e-12	6.30111e-10	Intron (uc008gzd.2/83921, intron 1 of 3)	19	21778340	21858360	80021	11319	ENSMUSG00000024754	Tmem2
Peak_47553	chr4	91293138	91293719	582	4.10625	3.53134	202.579	2.46538e-12	6.36767e-10	Intron (uc008ton.2/15569, intron 2 of 6)	4	91250767	91372055	121289	78336	ENSMUSG00000008489	Elavl2
Peak_43857	chr3	125855602	125856114	513	4.18516	3.86772	202.262	2.50293e-12	6.40847e-10	Distal Intergenic	3	125865343	125915882	50540	59768	ENSMUSG00000032854	Ugt8a
Peak_18216	chr13	83583793	83584384	592	3.00477	4.24512	202.22	2.50797e-12	6.40847e-10	Intron (uc007rie.2/17260, intron 3 of 10)	13	83573618	83667079	93462	10175	ENSMUSG00000005583	Mef2c
Peak_5264	chr1	187825495	187826110	616	4.666	3.82462	202.212	2.50895e-12	6.40847e-10	Intron (uc007eaa.2/26381, intron 2 of 7)	1	187997827	188214884	217058	-171717	ENSMUSG00000026610	Esrrg
Peak_34037	chr19	32269411	32270036	626	3.35801	4.35359	201.949	2.54072e-12	6.46575e-10	Intron (uc008hfe.2/208449, intron 1 of 9)	19	32122727	32276953	154227	6917	ENSMUSG00000040451	Sgms1
Peak_63937	chr8	123257003	123257476	474	4.96287	4.00005	203.44	2.57624e-12	6.53213e-10	Promoter (1-2kb)	8	123255707	123269736	14030	1296	ENSMUSG00000001065	Zfp276
Peak_29220	chr17	56185315	56186025	711	3.45004	4.37744	201.465	2.60013e-12	6.56866e-10	Promoter (1-2kb)	17	56176541	56183920	7380	-1395	ENSMUSG00000019579	Mydgf
Peak_51291	chr5	75238885	75239661	777	-3.75569	3.68136	201.177	2.63634e-12	6.59803e-10	Distal Intergenic	5	75176831	75176904	74	62054	ENSMUSG00000099060	Mir7025
Peak_9767	chr11	8863730	8864685	956	2.08078	5.77605	203.584	2.64008e-12	6.59803e-10	5' UTR	11	8993137	9011191	18055	146506	ENSMUSG00000020413	Hus1
Peak_24150	chr15	67885798	67886296	499	3.89709	3.87117	201.04	2.65368e-12	6.59803e-10	Distal Intergenic	15	68083738	68258856	175119	372560	ENSMUSG00000022335	Zfat
Peak_19343	chr13	115687250	115687885	636	2.57916	4.83422	201.017	2.6566e-12	6.59803e-10	Distal Intergenic	13	115034064	115101964	67901	-585286	ENSMUSG00000042284	Itga1
Peak_7379	chr10	64448629	64449754	1126	-3.62565	4.8212	224.942	2.65942e-12	6.59803e-10	Intron (uc007fkh.2/216033, intron 10 of 17)	10	64087496	64090255	2760	-358374	ENSMUSG00000042846	Lrrtm3
Peak_30417	chr18	5133079	5134334	1256	2.57863	4.93886	200.757	2.69008e-12	6.65026e-10	Distal Intergenic	18	5114281	5119293	5013	18798	ENSMUSG00000024236	Svil
Peak_839	chr1	37350788	37351384	597	3.53628	4.70552	211.183	2.70749e-12	6.6575e-10	Intron (uc007ark.2/269180, intron 1 of 23)	1	37369217	37404442	35226	-17833	ENSMUSG00000026113	Inpp4a
Peak_39836	chr2	169577551	169578192	642	-4.79594	3.70982	200.445	2.73073e-12	6.6575e-10	Distal Intergenic	2	169633646	169888504	254859	-55454	ENSMUSG00000047907	Tshz2
Peak_8730	chr10	105727384	105728131	748	-3.4862	3.82954	200.414	2.7348e-12	6.6575e-10	Distal Intergenic	10	105763185	105841380	78196	113249	ENSMUSG00000036009	Mettl25
Peak_60921	chr8	14472734	14473439	706	3.80049	4.35861	201.211	2.74734e-12	6.6575e-10	Intron (uc009kyy.2/244310, intron 3 of 15)	8	14381734	14831758	450025	91000	ENSMUSG00000047495	Dlgap2
Peak_11065	chr11	55136667	55137206	540	5.20935	4.03736	206.178	2.74959e-12	6.6575e-10	Exon (uc007iyy.1/uc007iyy.1, exon 1 of 2)	11	55124823	55151706	26884	14500	ENSMUSG00000049491	Slc36a3
Peak_53961	chr6	32373938	32374462	525	-3.7094	3.59173	200.293	2.75072e-12	6.6575e-10	Intron (uc009bgm.3/243743, intron 3 of 31)	6	32511141	32515576	4436	-136679	ENSMUSG00000086763	Plxna4os1
Peak_8895	chr10	110479076	110479567	492	3.54169	4.20737	199.877	2.80648e-12	6.7688e-10	Distal Intergenic	10	110600650	110615961	15312	-121083	ENSMUSG00000112398	9230102K24Rik
Peak_31557	chr18	41639845	41640812	968	3.21774	4.45392	199.336	2.88068e-12	6.92364e-10	Distal Intergenic	18	41875696	41951194	75499	310382	ENSMUSG00000056671	Prelid2
Peak_27912	chr17	3481669	3482478	810	-3.06193	4.18796	199.244	2.89362e-12	6.93066e-10	Promoter (<=1kb)	17	3482315	3519397	37083	0	ENSMUSG00000023800	Tiam2
Peak_31418	chr18	37849340	37850020	681	3.00802	4.16297	199.017	2.92561e-12	6.98312e-10	Intron (uc008eri.2/13367, intron 27 of 27)	18	37854605	37854660	56	4640	ENSMUSG00000098706	Mir6979
Peak_26140	chr16	31002024	31002716	693	3.93082	4.76525	218.549	2.98151e-12	7.07762e-10	Intron (uc007yxa.2/268880, intron 3 of 3)	16	30955503	31081432	125930	78716	ENSMUSG00000047434	Xxylt1
Peak_62015	chr8	57455741	57456176	436	3.40685	4.33557	198.598	2.98565e-12	7.07762e-10	Promoter (<=1kb)	8	57455923	57477585	21663	0	ENSMUSG00000031610	Scrg1
Peak_5912	chr10	14952884	14954008	1125	-3.11531	4.52914	198.252	3.03618e-12	7.16639e-10	Distal Intergenic	10	14760289	14770556	10268	192595	ENSMUSG00000019865	Nmbr
Peak_13136	chr12	8386316	8386845	530	3.64483	3.7481	198.201	3.0438e-12	7.16639e-10	Distal Intergenic	12	8313433	8343824	30392	72883	ENSMUSG00000020605	Hs1bp3
Peak_5859	chr10	13727497	13728217	721	2.93647	4.23212	197.927	3.08454e-12	7.23769e-10	Intron (uc007elb.1/66253, intron 3 of 5)	10	13798147	13861326	63180	133109	ENSMUSG00000019806	Aig1
Peak_67865	chrX	49877530	49878456	927	-3.73496	4.09453	197.785	3.106e-12	7.26343e-10	Distal Intergenic	20	49885469	49886401	933	7945	ENSMUSG00000056281	Olfr1322
Peak_20484	chr14	49745568	49746301	734	4.02397	4.26438	199.396	3.12413e-12	7.28123e-10	Intron (uc007tkj.2/67419, intron 5 of 7)	14	49681668	49783367	101700	37066	ENSMUSG00000036242	3632451O06Rik
Peak_61330	chr8	31128130	31128751	622	3.24408	4.44079	197.543	3.14287e-12	7.30031e-10	3' UTR	8	31111846	31131473	19628	16284	ENSMUSG00000039328	Rnf122
Peak_64629	chr9	25230492	25230996	505	4.95524	3.66919	197.365	3.17015e-12	7.33906e-10	Distal Intergenic	9	25252439	25308571	56133	-21443	ENSMUSG00000001833	Sept7
Peak_23026	chr15	27759829	27760539	711	3.21396	4.85494	207.229	3.23478e-12	7.44276e-10	Intron (uc007vjw.1/223435, intron 40 of 56)	15	27730649	27748551	17903	-11278	ENSMUSG00000022263	Trio
Peak_27162	chr16	71711712	71712393	682	-3.71843	3.72326	196.942	3.23645e-12	7.44276e-10	Distal Intergenic	16	71249904	71267176	17273	461808	NA	4930567J20Rik
Peak_2679	chr1	100369380	100370459	1080	2.76956	5.14101	206.2	3.26478e-12	7.48305e-10	Exon (uc007cfy.1/241175, exon 15 of 24)	1	100097761	100485942	388182	271619	ENSMUSG00000067028	Cntnap5b
Peak_45236	chr4	5771958	5772532	575	3.06164	4.50867	196.63	3.28613e-12	7.50713e-10	Promoter (<=1kb)	4	5772879	5799944	27066	-347	ENSMUSG00000049119	Fam110b
Peak_37291	chr2	83848071	83848839	769	-3.30483	4.5668	200.33	3.29816e-12	7.50983e-10	Intron (uc008kie.1/241520, intron 1 of 7)	2	83812728	83881358	68631	35343	ENSMUSG00000048388	Fam171b
Peak_4701	chr1	171419296	171420233	938	3.1279	4.6004	196.385	3.32582e-12	7.54797e-10	Promoter (<=1kb)	1	171419033	171420352	1320	263	ENSMUSG00000103711	Tstd1
Peak_8092	chr10	86032517	86033157	641	3.89341	4.13996	196.127	3.36822e-12	7.56253e-10	Intron (uc007gnk.1/69754, intron 4 of 8)	10	86022154	86048328	26175	10363	ENSMUSG00000001786	Fbxo7
Peak_42692	chr3	90559905	90560507	603	3.88399	4.30173	197.195	3.3825e-12	7.56253e-10	Distal Intergenic	3	90541223	90543151	1929	18682	ENSMUSG00000074457	S100a16
Peak_57172	chr6	145677503	145678187	685	-3.93068	4.18531	198.25	3.39549e-12	7.56253e-10	Distal Intergenic	6	145615963	145621477	5515	61540	ENSMUSG00000067338	Tuba3b
Peak_63326	chr8	102490990	102491564	575	3.84815	4.08889	195.886	3.40836e-12	7.56253e-10	Distal Intergenic	8	102632095	102785111	153017	293547	ENSMUSG00000031673	Cdh11
Peak_17939	chr13	73509686	73510224	539	3.98532	4.14485	195.826	3.41845e-12	7.56253e-10	Exon (uc007rdk.1/210992, exon 10 of 14)	13	73536747	73578672	41926	-26523	ENSMUSG00000021609	Slc6a3
Peak_16044	chr12	119357320	119358369	1050	2.58057	5.03887	195.793	3.42399e-12	7.56253e-10	Distal Intergenic	12	119443410	119466932	23523	-85041	ENSMUSG00000041886	Macc1
Peak_30866	chr18	20716570	20717119	550	-4.13769	3.67508	195.789	3.42461e-12	7.56253e-10	Intron (uc008eeu.2/56386, intron 3 of 8)	18	20684599	20746404	61806	29285	ENSMUSG00000056124	B4galt6
Peak_58685	chr7	73196735	73197555	821	2.24905	5.38757	195.773	3.42737e-12	7.56253e-10	Distal Intergenic	7	73097752	73102068	4317	-94667	ENSMUSG00000108383	Gm6567
Peak_46833	chr4	64200175	64201162	988	-2.59405	4.9788	197.384	3.44315e-12	7.56253e-10	Distal Intergenic	4	64012669	64047015	34347	-153160	ENSMUSG00000028364	Tnc
Peak_25900	chr16	23827946	23828597	652	3.43674	4.39304	195.678	3.4434e-12	7.56253e-10	Distal Intergenic	16	23889581	23890844	1264	62247	ENSMUSG00000004366	Sst
Peak_8379	chr10	94529835	94530504	670	3.45434	4.14299	195.565	3.46256e-12	7.56253e-10	Intron (uc007gvt.2/319880, intron 1 of 3)	10	94514857	94590954	76098	14978	ENSMUSG00000020023	Tmcc3
Peak_8250	chr10	90699072	90699884	813	3.24837	4.25584	195.516	3.47087e-12	7.56253e-10	Intron (uc033frv.1/77531, intron 17 of 24)	10	90577089	90972984	395896	121983	ENSMUSG00000058589	Anks1b
Peak_16750	chr13	25957459	25958322	864	-2.76082	4.71754	195.497	3.47426e-12	7.56253e-10	Intron (uc007pwy.2/100503530, intron 1 of 3)	13	25921035	25966316	45282	7994	ENSMUSG00000086531	Gm11351
Peak_37758	chr2	104130136	104130749	614	3.50849	4.13177	195.405	3.49002e-12	7.57302e-10	Distal Intergenic	2	104122769	104124746	1978	7367	ENSMUSG00000032671	A930018P22Rik
Peak_36227	chr2	51047545	51047975	431	-3.90807	3.41481	195.248	3.517e-12	7.60771e-10	Distal Intergenic	2	51130439	51149111	18673	101136	ENSMUSG00000017144	Rnd3
Peak_24557	chr15	79201549	79203109	1561	2.35291	5.03582	194.956	3.56799e-12	7.67451e-10	Intron (uc011zvz.1/100041655, intron 2 of 4)	15	79209311	79217383	8073	-6202	ENSMUSG00000075555	Gm10863
Peak_13966	chr12	39942940	39943331	392	3.46902	4.0723	194.945	3.57005e-12	7.67451e-10	Distal Intergenic	12	40005447	40037376	31930	94045	ENSMUSG00000047446	Arl4a
Peak_31684	chr18	45008567	45009250	684	-3.38038	4.02551	194.628	3.62631e-12	7.7713e-10	Distal Intergenic	18	44854992	44889720	34729	153575	ENSMUSG00000034653	Ythdc2
Peak_62133	chr8	61359056	61359437	382	4.11988	3.56608	194.271	3.69096e-12	7.88543e-10	Intron (uc009ltw.1/59009, intron 6 of 10)	8	61281522	61288872	7351	-70184	ENSMUSG00000099419	1700001D01Rik
Peak_56648	chr6	128349653	128350174	522	3.32269	4.16394	194.032	3.73483e-12	7.95462e-10	Intron (uc009edh.1/22158, intron 1 of 10)	6	128321161	128355851	34691	5677	ENSMUSG00000001521	Tulp3
Peak_49961	chr5	27306275	27307112	838	2.65559	4.6976	193.883	3.76258e-12	7.98913e-10	Intron (uc008wtj.1/13483, intron 1 of 3)	5	27261935	27727500	465566	44340	ENSMUSG00000061576	Dpp6
Peak_63600	chr8	111375008	111375629	622	4.49518	3.94351	193.802	3.77779e-12	7.99689e-10	Intron (uc009nmf.2/338521, intron 1 of 6)	8	111345138	111393821	48684	18192	ENSMUSG00000033579	Fa2h
Peak_22108	chr14	115031757	115032314	558	4.07626	4.15845	193.722	3.79271e-12	8.00401e-10	Distal Intergenic	14	115043671	115043754	84	-11357	ENSMUSG00000065508	Mir17
Peak_42089	chr3	70683039	70683819	781	-4.47677	4.54307	221.146	3.81236e-12	8.01146e-10	Distal Intergenic	3	70772379	70807291	34913	123472	ENSMUSG00000097252	Gm6634
Peak_3825	chr1	146843929	146844630	702	2.42425	5.26287	195.827	3.81939e-12	8.01146e-10	Intron (uc007cxo.2/215378, intron 7 of 7)	1	146497738	146517554	19817	346191	ENSMUSG00000035131	Brinp3
Peak_25992	chr16	26612580	26613281	702	2.79653	4.54029	193.267	3.87954e-12	8.11304e-10	Intron (uc007yvd.2/16180, intron 1 of 7)	16	26581705	26725147	143443	30875	ENSMUSG00000022514	Il1rap
Peak_33698	chr19	21814409	21814881	473	3.76858	4.0163	192.898	3.95147e-12	8.23858e-10	Intron (uc008gzg.2/83921, intron 11 of 24)	19	21778340	21858360	80021	36069	ENSMUSG00000024754	Tmem2
Peak_58561	chr7	68744115	68744538	424	-4.40487	4.04696	198.024	4.01266e-12	8.33056e-10	Intron (uc009hjh.1/66412, intron 3 of 7)	7	68736994	68749238	12245	4700	ENSMUSG00000042659	Arrdc4
Peak_39108	chr2	146221237	146222213	977	-2.04554	5.45659	192.554	4.01966e-12	8.33056e-10	Promoter (<=1kb)	2	146221997	146225018	3022	0	ENSMUSG00000068154	Insm1
Peak_37947	chr2	109389641	109390279	639	-3.17674	4.09055	192.434	4.04395e-12	8.34153e-10	Distal Intergenic	2	109280738	109341746	61009	108903	ENSMUSG00000027115	Kif18a
Peak_54856	chr6	66897958	66898344	387	2.80752	4.26186	192.409	4.04905e-12	8.34153e-10	Promoter (1-2kb)	6	66896891	67021361	124471	1067	ENSMUSG00000036402	Gng12
Peak_50424	chr5	43247642	43248500	859	2.80608	4.46156	192.147	4.10239e-12	8.42634e-10	Intron (uc008xhk.2/231207, intron 3 of 10)	5	43151686	43235354	83669	-12288	ENSMUSG00000085720	Gm7854
Peak_43322	chr3	108511014	108511713	700	-2.89036	4.03262	191.871	4.15935e-12	8.47004e-10	Intron (uc008qzd.1/229722, intron 1 of 20)	3	108458069	108536522	78454	24809	ENSMUSG00000040412	5330417C22Rik
Peak_60643	chr8	4192270	4193179	910	2.69216	5.01971	195.459	4.16002e-12	8.47004e-10	Exon (uc009ktb.2/213027, exon 9 of 11)	8	4209543	4217312	7770	24133	ENSMUSG00000064125	Prr36
Peak_36746	chr2	65311068	65311709	642	4.19747	4.40611	201.753	4.16038e-12	8.47004e-10	Distal Intergenic	2	65316633	65364026	47394	52317	ENSMUSG00000061171	Slc38a11
Peak_37069	chr2	75334325	75334689	365	4.37198	3.32591	191.754	4.1839e-12	8.49295e-10	Distal Intergenic	2	75436057	75444179	8123	109490	NA	9430019J16Rik
Peak_29362	chr17	62862338	62863101	764	2.44416	5.07748	191.691	4.19701e-12	8.49465e-10	Intron (uc008dfg.2/13640, intron 1 of 4)	17	62602957	62881317	278361	18216	ENSMUSG00000048915	Efna5
Peak_3574	chr1	136214598	136215125	528	3.91676	3.894	191.469	4.2439e-12	8.54072e-10	Intron (uc007cuo.2/67313, intron 9 of 9)	1	136223563	136227662	4100	12537	ENSMUSG00000041605	5730559C18Rik
Peak_61463	chr8	35212000	35212646	647	3.80852	4.21137	191.467	4.24445e-12	8.54072e-10	Distal Intergenic	8	35375741	35388137	12397	-163095	ENSMUSG00000046794	Ppp1r3b
Peak_36962	chr2	71517028	71517756	729	-3.79479	3.59312	191.332	4.27318e-12	8.57362e-10	Intron (uc056zne.1/100628577, intron 1 of 2)	2	71529445	71533981	4537	-11689	ENSMUSG00000041911	Dlx1
Peak_22935	chr15	25731086	25731806	721	2.72351	4.56723	191.016	4.34162e-12	8.6641e-10	Intron (uc007vjb.1/17909, intron 8 of 21)	15	25752910	25776432	23523	-21104	ENSMUSG00000022272	Myo10
Peak_43523	chr3	116304959	116305894	936	2.42461	5.47389	200.781	4.35323e-12	8.6641e-10	Intron (uc008rca.1/229776, intron 11 of 15)	3	116249654	116253484	3831	-51475	ENSMUSG00000068696	Gpr88
Peak_16745	chr13	25738550	25739019	470	3.7293	3.88729	190.951	4.35583e-12	8.6641e-10	Distal Intergenic	13	25921035	25966316	45282	227297	ENSMUSG00000086531	Gm11351
Peak_8436	chr10	95618516	95619022	507	-3.93467	4.00658	190.763	4.39736e-12	8.72164e-10	Distal Intergenic	10	95547007	95564167	17161	-54349	ENSMUSG00000020029	Nudt4
Peak_22137	chr14	115804691	115805149	459	3.13166	4.4572	190.679	4.41588e-12	8.73334e-10	Intron (uc007uyi.2/103978, intron 7 of 7)	14	115396551	115409552	13002	-395139	ENSMUSG00000093551	4930505G20Rik
Peak_61758	chr8	46146081	46146555	475	3.27969	4.34758	190.189	4.52638e-12	8.92196e-10	Distal Intergenic	8	46163689	46195590	31902	-17134	ENSMUSG00000031631	Cfap97
Peak_52776	chr5	137966378	137966942	565	3.76568	3.75295	190.068	4.55407e-12	8.92196e-10	Distal Intergenic	5	137953809	137962959	9151	-3419	ENSMUSG00000056966	Gjc3
Peak_15915	chr12	113163606	113164187	582	3.08334	4.48448	190.053	4.55752e-12	8.92196e-10	3' UTR	12	113156421	113165458	9038	7185	ENSMUSG00000037466	Tedc1
Peak_51754	chr5	97799924	97800566	643	2.70963	4.51823	190.03	4.56281e-12	8.92196e-10	Distal Intergenic	5	97884688	98030962	146275	230396	ENSMUSG00000029338	Antxr2
Peak_30723	chr18	13929781	13930386	606	-3.30284	4.37525	189.967	4.57728e-12	8.92505e-10	Intron (uc008edd.2/225207, intron 3 of 7)	18	13687359	13971720	284362	41334	ENSMUSG00000024420	Zfp521
Peak_46936	chr4	68056854	68057570	717	-3.3423	4.55311	195.291	4.72705e-12	9.19119e-10	Distal Intergenic	4	68761372	68954397	193026	896827	ENSMUSG00000028351	Brinp1
Peak_32204	chr18	61241375	61241923	549	4.16499	3.83896	189.124	4.77685e-12	9.262e-10	Intron (uc008fbv.1/225600, intron 5 of 21)	18	61220499	61289718	69220	20876	ENSMUSG00000024575	Pde6a
Peak_16309	chr13	15052602	15053473	872	2.49714	4.77428	188.698	4.88138e-12	9.41216e-10	Intron (uc007pnp.1/uc007pnp.1, intron 1 of 2)	13	15463235	15715114	251880	-409762	ENSMUSG00000021318	Gli3
Peak_58728	chr7	73917685	73918718	1034	2.25475	5.80399	202.947	4.88149e-12	9.41216e-10	Distal Intergenic	7	73825924	73836549	10626	91761	NA	Gm21269
Peak_40878	chr3	32343309	32343789	481	2.81293	4.62112	188.633	4.89738e-12	9.41658e-10	Exon (uc008owc.1/22401, exon 4 of 6)	3	32365489	32367438	1950	-21700	NA	4930429B21Rik
Peak_23904	chr15	59435648	59436267	620	2.99671	4.34342	188.349	4.96867e-12	9.47239e-10	Intron (uc007vxu.2/68501, intron 3 of 4)	15	59374198	59601684	227487	61450	ENSMUSG00000059586	Nsmce2
Peak_5959	chr10	17562742	17563668	927	-3.44943	4.58806	197.946	4.97397e-12	9.47239e-10	Distal Intergenic	10	17723228	17725674	2447	-159560	ENSMUSG00000039910	Cited2
Peak_65790	chr9	67265417	67266041	625	3.33831	4.19742	188.322	4.97558e-12	9.47239e-10	Intron (uc012gvy.1/70549, intron 7 of 19)	9	67217085	67262095	45011	-3322	ENSMUSG00000052698	Tln2
Peak_5336	chr1	190654069	190654900	832	-3.31614	3.92572	188.3	4.98115e-12	9.47239e-10	Distal Intergenic	1	190772879	190834098	61220	179198	ENSMUSG00000089872	Rps6kc1
Peak_11232	chr11	61537382	61537794	413	4.88839	3.70057	188.05	5.04492e-12	9.55173e-10	Intron (uc007jhv.2/13855, intron 2 of 9)	11	61505172	61512927	7756	32210	ENSMUSG00000001039	B9d1
Peak_52616	chr5	131869724	131870145	422	-4.37614	3.00379	188.029	5.05047e-12	9.55173e-10	Intron (uc008zuv.1/319974, intron 4 of 19)	5	131880269	131883768	3500	-10124	ENSMUSG00000105773	4930563F08Rik
Peak_544	chr1	24230400	24230838	439	2.71183	4.46885	187.828	5.10261e-12	9.62406e-10	Intron (uc007amo.2/12839, intron 29 of 37)	1	24195203	24252738	57536	35197	ENSMUSG00000026147	Col9a1
Peak_26163	chr16	31591931	31592873	943	-2.43406	4.68065	187.568	5.17059e-12	9.72577e-10	Distal Intergenic	16	31663443	31873356	209914	-70570	ENSMUSG00000022770	Dlg1
Peak_10002	chr11	19190534	19191215	682	3.5523	4.16344	187.277	5.24832e-12	9.84522e-10	Distal Intergenic	11	19065275	19075740	10466	125259	ENSMUSG00000086025	4933406G16Rik
Peak_64284	chr9	12875049	12875603	555	3.89201	3.94437	187.038	5.31276e-12	9.93918e-10	Distal Intergenic	9	13091267	13105855	14589	230252	ENSMUSG00000111830	4930568E12Rik
Peak_51527	chr5	88830279	88831261	983	-3.15272	4.53631	188.798	5.41447e-12	1.0097e-09	Distal Intergenic	5	88887260	89239656	352397	-55999	ENSMUSG00000060961	Slc4a4
Peak_5994	chr10	18388776	18390084	1309	-2.0739	5.30632	186.626	5.42628e-12	1.0097e-09	Distal Intergenic	10	18407638	18421140	13503	-17554	ENSMUSG00000039835	Nhsl1
Peak_16242	chr13	12196005	12196743	739	2.69927	4.81887	186.345	5.50511e-12	1.02037e-09	Intron (uc007plg.2/238505, intron 2 of 7)	13	12186540	12200490	13951	3747	ENSMUSG00000021311	Mtr
Peak_42115	chr3	73323134	73323856	723	3.3945	4.45864	186.402	5.51312e-12	1.02037e-09	Intron (uc008pmu.1/626082, intron 2 of 4)	3	73351206	73481651	130446	157795	ENSMUSG00000102362	4930509J09Rik
Peak_69101	chrX	164045947	164046406	460	3.64596	3.80918	185.821	5.65584e-12	1.04171e-09	Distal Intergenic	20	163976822	164028010	51189	-17937	ENSMUSG00000031373	Car5b
Peak_22936	chr15	25737274	25737729	456	4.73938	3.56161	185.811	5.65854e-12	1.04171e-09	Exon (uc007vjb.1/17909, exon 14 of 22)	15	25752910	25776432	23523	-15181	ENSMUSG00000022272	Myo10
Peak_43753	chr3	122471031	122471665	635	3.15788	4.71098	190.982	5.72788e-12	1.05168e-09	Intron (uc008req.2/29815, intron 3 of 11)	3	122419780	122530182	110403	51251	ENSMUSG00000028121	Bcar3
Peak_2336	chr1	86294334	86295022	689	3.08161	4.49065	185.397	5.7807e-12	1.05276e-09	Distal Intergenic	1	86303221	86307305	4085	-8199	ENSMUSG00000079445	B3gnt7
Peak_61160	chr8	25196867	25197472	606	2.9313	4.64595	185.334	5.79955e-12	1.05276e-09	Intron (uc009lfs.2/320165, intron 2 of 12)	8	25154552	25201542	46991	4070	ENSMUSG00000065954	Tacc1
Peak_24007	chr15	63670839	63671505	667	2.35036	4.89142	185.322	5.80333e-12	1.05276e-09	Distal Intergenic	15	63775971	63808739	32769	137234	ENSMUSG00000079025	Gsdmc
Peak_43237	chr3	107348898	107349425	528	3.53653	4.04107	185.311	5.80645e-12	1.05276e-09	Distal Intergenic	3	107326110	107333289	7180	-15609	ENSMUSG00000048109	Rbm15
Peak_23583	chr15	47760843	47761696	854	-3.23299	4.00636	185.3	5.80981e-12	1.05276e-09	Intron (uc007vqr.1/239420, intron 17 of 53)	15	47580638	47615201	34564	-145642	ENSMUSG00000022311	Csmd3
Peak_49535	chr5	12410010	12410570	561	2.99983	4.05384	185.148	5.85552e-12	1.05827e-09	Intron (uc008wlw.2/108151, intron 1 of 6)	5	12383166	12588943	205778	26844	ENSMUSG00000040254	Sema3d
Peak_59311	chr7	96400367	96400974	608	2.67771	4.85448	185.066	5.88064e-12	1.06005e-09	Intron (uc009iiq.2/23966, intron 2 of 32)	7	96339483	96341964	2482	-58403	ENSMUSG00000085751	Gm15412
Peak_32770	chr18	77822328	77822970	643	4.1853	4.12354	186.556	5.90487e-12	1.06035e-09	Intron (uc008frw.1/19201, intron 3 of 7)	18	77794550	77882879	88330	27778	ENSMUSG00000025429	Pstpip2
Peak_63223	chr8	95411347	95412128	782	2.88223	4.08233	184.917	5.92602e-12	1.06035e-09	Distal Intergenic	8	95420250	95434869	14620	22741	ENSMUSG00000031796	Cfap20
Peak_50331	chr5	39129407	39129998	592	3.40459	3.87846	184.91	5.92826e-12	1.06035e-09	Distal Intergenic	5	38706457	38876693	170237	-252714	ENSMUSG00000039315	Clnk
Peak_66863	chr9	103656200	103656635	436	3.9522	3.92817	184.801	5.96159e-12	1.06356e-09	Intron (uc009rgx.2/81907, intron 1 of 4)	9	103482936	103692807	209872	36172	ENSMUSG00000042757	Tmem108
Peak_168	chr1	12016672	12017206	535	3.7767	4.19113	184.566	6.03485e-12	1.07386e-09	Distal Intergenic	1	12425986	12426106	121	-408780	ENSMUSG00000098555	Mir6341
Peak_65333	chr9	50976382	50976834	453	4.11547	3.66461	184.208	6.14797e-12	1.09055e-09	Intron (uc009pky.1/235344, intron 3 of 15)	9	50892801	51009073	116273	32239	ENSMUSG00000037112	Sik2
Peak_12712	chr11	114239222	114239828	607	-3.41615	3.67603	184.161	6.16301e-12	1.09055e-09	Distal Intergenic	11	114198258	114199199	942	40964	ENSMUSG00000078600	1700092K14Rik
Peak_36226	chr2	51046214	51046759	546	3.36655	4.07608	184.121	6.17592e-12	1.09055e-09	Distal Intergenic	2	51130439	51149111	18673	102352	ENSMUSG00000017144	Rnd3
Peak_53431	chr6	13369805	13370365	561	-4.0784	3.74948	183.563	6.35792e-12	1.11984e-09	Distal Intergenic	6	13413337	13415996	2660	-42972	ENSMUSG00000101894	1700016P04Rik
Peak_31906	chr18	52846956	52847441	486	4.02675	4.08011	183.484	6.38414e-12	1.1216e-09	Intron (uc008exm.2/67847, intron 2 of 10)	18	52768144	52915931	147788	78812	ENSMUSG00000024534	Sncaip
Peak_42464	chr3	85846313	85846662	350	-4.93145	2.97907	183.372	6.42143e-12	1.12529e-09	Intron (uc008pqg.3/99889, intron 1 of 9)	3	85801047	85887518	86472	40856	ENSMUSG00000031286	Glt28d2
Peak_19856	chr14	20595720	20596303	584	3.39592	4.2402	183.283	6.45136e-12	1.12768e-09	Intron (uc007skb.1/78787, intron 3 of 20)	14	20548912	20618354	69443	22051	ENSMUSG00000034235	Usp54
Peak_58240	chr7	55401133	55401813	681	-3.40664	4.26683	182.885	6.58666e-12	1.14844e-09	Distal Intergenic	7	55768178	55772582	4405	-366365	ENSMUSG00000051504	Siglech
Peak_31000	chr18	24132012	24132676	665	3.9678	4.41933	191.963	6.62867e-12	1.15286e-09	Distal Intergenic	18	24104761	24121819	17059	-10193	ENSMUSG00000047989	Ino80c
Peak_6985	chr10	51869291	51870012	722	3.58587	4.846	203.736	6.68688e-12	1.16007e-09	Distal Intergenic	10	51756174	51757194	1021	-112097	ENSMUSG00000062224	4933411G06Rik
Peak_23520	chr15	43615750	43616300	551	3.10635	4.19111	182.473	6.73051e-12	1.1628e-09	Distal Intergenic	15	43477229	43527777	50549	138521	ENSMUSG00000022337	Emc2
Peak_24036	chr15	64380530	64380906	377	3.19281	4.16999	182.444	6.74051e-12	1.1628e-09	Promoter (2-3kb)	15	64086840	64382919	296080	2013	ENSMUSG00000022377	Asap1
Peak_27577	chr16	87729111	87729588	478	3.6558	4.05347	182.409	6.75304e-12	1.1628e-09	Exon (uc007zuq.1/12013, exon 5 of 5)	16	87698954	87733346	34393	30157	ENSMUSG00000025612	Bach1
Peak_2225	chr1	83701720	83702487	768	3.14384	4.24056	182.358	6.77094e-12	1.16299e-09	Distal Intergenic	1	83265127	83408200	143074	-293520	ENSMUSG00000026163	Sphkap
Peak_42180	chr3	77831030	77831844	815	2.52029	4.80104	182.199	6.82754e-12	1.16573e-09	Distal Intergenic	3	79062511	79144887	82377	1313043	ENSMUSG00000062232	Rapgef2
Peak_18512	chr13	94316774	94317442	669	-3.68955	3.54683	182.172	6.83731e-12	1.16573e-09	Distal Intergenic	13	94201433	94285831	84399	-30943	ENSMUSG00000021687	Scamp1
Peak_932	chr1	39947222	39948299	1078	1.84508	5.67162	182.172	6.83739e-12	1.16573e-09	Intron (uc007atr.1/26921, intron 2 of 30)	1	39900913	40026310	125398	46309	ENSMUSG00000026074	Map4k4
Peak_57451	chr7	16557293	16558228	936	3.73143	4.3308	183.949	6.95454e-12	1.18278e-09	Intron (uc009fhw.1/232906, intron 2 of 6)	7	16494473	16614993	120521	56765	ENSMUSG00000058230	Arhgap35
Peak_28344	chr17	25663025	25663821	797	3.55083	4.25046	181.737	6.99534e-12	1.18681e-09	Distal Intergenic	17	25612296	25647596	35301	50729	ENSMUSG00000002279	Lmf1
Peak_36536	chr2	59603076	59603707	632	3.92394	4.42135	190.503	7.11838e-12	1.20404e-09	Distal Intergenic	2	59612042	59846213	234172	-8335	ENSMUSG00000035168	Tanc1
Peak_9755	chr11	8622438	8623031	594	2.89085	4.41519	181.37	7.13169e-12	1.20404e-09	Intron (uc007hzk.1/319939, intron 1 of 30)	11	8431652	8664535	232884	41504	ENSMUSG00000020422	Tns3
Peak_51256	chr5	74482547	74483485	939	3.19909	4.29936	181.223	7.18726e-12	1.21047e-09	Intron (uc008xtk.3/212986, intron 2 of 8)	5	74204816	74531742	326927	48257	ENSMUSG00000062110	Scfd2
Peak_26421	chr16	40295330	40295694	365	-4.23195	3.19433	181.09	7.23784e-12	1.21565e-09	Intron (uc007zfq.1/uc007zfq.1, intron 2 of 2)	16	39984371	42176292	2191922	310959	ENSMUSG00000061080	Lsamp
Peak_15067	chr12	81224899	81225517	619	3.58708	4.3605	182.801	7.25918e-12	1.21565e-09	Intron (uc007obv.2/110893, intron 2 of 7)	12	81166151	81166234	84	58748	ENSMUSG00000092673	Mir3067
Peak_36007	chr2	43217083	43217570	488	-3.48528	3.71583	181.004	7.27073e-12	1.21565e-09	Distal Intergenic	2	43555325	43636758	81434	-337755	ENSMUSG00000026866	Kynu
Peak_17464	chr13	53011407	53011976	570	3.43211	4.1259	180.787	7.3544e-12	1.22668e-09	Distal Intergenic	13	52967209	52981039	13831	-30368	ENSMUSG00000056749	Nfil3
Peak_49759	chr5	20843719	20844298	580	-3.67938	4.02079	180.734	7.37522e-12	1.22719e-09	Intron (uc008wnz.2/68770, intron 2 of 17)	5	20758664	20882124	123461	37826	ENSMUSG00000039987	Phtf2
Peak_10534	chr11	35831995	35832500	506	4.10983	3.54052	180.671	7.39984e-12	1.22834e-09	Promoter (2-3kb)	11	35808381	35834528	26148	2028	ENSMUSG00000018848	Rars
Peak_35081	chr2	12896376	12897282	907	3.18619	4.52603	180.513	7.462e-12	1.23497e-09	Distal Intergenic	2	12924041	13003454	79414	-26759	ENSMUSG00000026730	Pter
Peak_4571	chr1	168269003	168269729	727	-3.04012	3.79887	180.479	7.47546e-12	1.23497e-09	Intron (uc007dld.2/18514, intron 2 of 7)	1	168119364	168432169	312806	162440	ENSMUSG00000052534	Pbx1
Peak_32996	chr18	84253532	84253996	465	3.56236	3.93867	180.274	7.55701e-12	1.24547e-09	Intron (uc008fuo.2/240476, intron 8 of 8)	18	84279820	84412420	132601	158424	ENSMUSG00000048410	Zfp407
Peak_53298	chr6	8068952	8069664	713	3.50619	4.53866	186.691	7.60132e-12	1.24639e-09	Intron (uc009axi.1/213945, intron 25 of 34)	6	8074822	8079763	4942	10099	ENSMUSG00000068794	Col28a1
Peak_7195	chr10	59283276	59284174	899	3.48375	4.42666	182.172	7.6061e-12	1.24639e-09	Distal Intergenic	10	59323296	59373304	50009	-39122	ENSMUSG00000019916	P4ha1
Peak_9357	chr10	123455232	123455899	668	3.74967	3.82034	180.125	7.61663e-12	1.24639e-09	Intron (uc007hgu.2/268354, intron 2 of 5)	10	123264076	123741204	477129	191156	ENSMUSG00000044071	Fam19a2
Peak_32944	chr18	82989830	82990506	677	2.96912	4.51536	179.908	7.70491e-12	1.25786e-09	Intron (uc008fuf.2/329003, intron 3 of 5)	18	82919940	82920560	621	-69270	NA	4930592I03Rik
Peak_52833	chr5	140073459	140074192	734	-3.01968	4.19578	179.762	7.76478e-12	1.26244e-09	Intron (uc009ahj.1/17120, intron 16 of 17)	5	139907943	139974724	66782	165516	ENSMUSG00000048988	Elfn1
Peak_12531	chr11	108020804	108021348	545	3.84156	3.62514	179.751	7.76942e-12	1.26244e-09	Intron (uc011ygr.1/18750, intron 5 of 16)	11	107996848	107996916	69	23956	ENSMUSG00000098989	Mir7223
Peak_30422	chr18	5207604	5208346	743	-2.93853	4.28434	179.644	7.8137e-12	1.26666e-09	Downstream (1-2kb)	18	5114281	5119293	5013	93323	ENSMUSG00000024236	Svil
Peak_8890	chr10	110383650	110384212	563	-3.9758	3.70912	179.558	7.84954e-12	1.26689e-09	Distal Intergenic	10	110600650	110615961	15312	-216438	ENSMUSG00000112398	9230102K24Rik
Peak_13253	chr12	12544379	12544894	516	3.36258	4.15134	179.521	7.86481e-12	1.26689e-09	Distal Intergenic	12	12351522	12392475	40954	-151904	ENSMUSG00000114136	4921511I17Rik
Peak_17832	chr13	69706046	69706581	536	4.11513	3.71218	179.509	7.87005e-12	1.26689e-09	Intron (uc007rcp.2/76980, intron 1 of 1)	13	69702832	69739897	37066	33316	ENSMUSG00000052981	Ube2ql1
Peak_35959	chr2	40223293	40224026	734	-3.36517	3.51376	179.25	7.97916e-12	1.28148e-09	Distal Intergenic	2	40596773	40615251	18479	391225	ENSMUSG00000049252	Lrp1b
Peak_54948	chr6	72146818	72147180	363	3.86885	3.51337	178.742	8.19814e-12	1.3136e-09	Exon (uc009chy.2/20454, exon 5 of 7)	6	72120213	72123197	2985	-23621	ENSMUSG00000108709	4933431G14Rik
Peak_16765	chr13	26575707	26576648	942	2.57942	5.66868	205.298	8.27291e-12	1.32252e-09	Distal Intergenic	13	26768172	26770165	1994	193517	ENSMUSG00000045835	Hdgfl1
Peak_54067	chr6	36644713	36645343	631	-3.01747	4.48535	178.516	8.29768e-12	1.32342e-09	Distal Intergenic	6	36715663	36811361	95699	166018	ENSMUSG00000029838	Ptn
Peak_9789	chr11	9591847	9592274	428	-4.25058	3.0218	178.31	8.38977e-12	1.33503e-09	Intron (uc007iaa.1/268379, intron 55 of 61)	11	9191942	9684259	492318	399905	ENSMUSG00000004668	Abca13
Peak_18142	chr13	81222131	81222721	591	3.2979	3.71672	178.049	8.50755e-12	1.34939e-09	Intron (uc011zcf.1/110789, intron 23 of 27)	13	81095068	81444578	349511	221857	ENSMUSG00000069170	Adgrv1
Peak_19653	chr14	12337534	12338688	1155	-2.73868	4.57183	178.024	8.51895e-12	1.34939e-09	Distal Intergenic	14	12341892	12345844	3953	7156	ENSMUSG00000021743	Fezf2
Peak_53361	chr6	9210283	9211152	870	3.53165	4.73006	194.303	8.58955e-12	1.35498e-09	Intron (uc009ayb.1/18231, intron 2 of 2)	6	8950019	9248578	298560	260264	ENSMUSG00000046178	Nxph1
Peak_33600	chr19	18597831	18598192	362	3.72975	3.86442	177.862	8.59344e-12	1.35498e-09	Intron (uc008gxs.2/20409, intron 2 of 9)	19	18580364	18631813	51450	33621	ENSMUSG00000024725	Ostf1
Peak_41308	chr3	48804263	48804980	718	-4.07379	4.19831	186.338	8.74825e-12	1.37626e-09	Distal Intergenic	3	48605731	48609100	3370	-195163	NA	1700018B24Rik
Peak_41683	chr3	59348946	59349151	206	3.83536	3.28326	177.255	8.87789e-12	1.39349e-09	Distal Intergenic	3	59316735	59344256	27522	-4690	ENSMUSG00000036334	Igsf10
Peak_44020	chr3	129639930	129641070	1141	1.95071	5.34842	177.094	8.95493e-12	1.4024e-09	Distal Intergenic	3	129677577	129725086	47510	84016	ENSMUSG00000028017	Egf
Peak_40137	chr2	180854709	180855508	800	-2.97943	4.03416	176.984	9.00849e-12	1.4076e-09	Intron (uc008okc.1/uc008okc.1, intron 1 of 3)	2	180894040	180894107	68	-38532	ENSMUSG00000065454	Mir124a-3
Peak_44299	chr3	136109458	136110167	710	-3.34156	4.3758	179.812	9.10425e-12	1.41936e-09	Intron (uc008rmd.2/242248, intron 7 of 16)	3	136210162	136247770	37609	137603	ENSMUSG00000037922	Bank1
Peak_34834	chr2	4406925	4407536	612	2.82173	4.66961	176.73	9.13243e-12	1.42055e-09	Intron (uc008ieo.2/209630, intron 1 of 22)	2	4400976	4614043	213068	5949	ENSMUSG00000026657	Frmd4a
Peak_46525	chr4	54636462	54637549	1088	3.14073	4.82329	185.455	9.15588e-12	1.42101e-09	Distal Intergenic	4	54947945	55083563	135619	-310396	ENSMUSG00000060206	Zfp462
Peak_10496	chr11	35039233	35039862	630	-3.24555	3.60732	176.258	9.36792e-12	1.45064e-09	Distal Intergenic	11	35121456	35708507	587052	-81594	ENSMUSG00000056427	Slit3
Peak_61293	chr8	29675752	29676408	657	-3.5936	3.90378	176.185	9.40521e-12	1.45064e-09	Distal Intergenic	8	28646717	29219636	572920	-456116	ENSMUSG00000063626	Unc5d
Peak_62578	chr8	76383622	76384688	1067	-2.76009	4.63036	176.15	9.42319e-12	1.45064e-09	Distal Intergenic	8	76749087	76900173	151087	515485	ENSMUSG00000074235	Gm10649
Peak_8623	chr10	101422411	101423098	688	2.74188	4.45698	176.135	9.43062e-12	1.45064e-09	Distal Intergenic	10	101681487	102391468	709982	-258389	ENSMUSG00000019888	Mgat4c
Peak_7846	chr10	80156890	80157349	460	3.2605	4.33887	176.092	9.4526e-12	1.4508e-09	3' UTR	10	80149682	80158368	8687	7208	ENSMUSG00000035621	Midn
Peak_56333	chr6	119321730	119322139	410	3.59909	3.7993	175.761	9.62355e-12	1.47241e-09	Intron (uc012ern.1/319734, intron 25 of 34)	6	119315133	119329204	14072	7065	ENSMUSG00000055003	Lrtm2
Peak_31008	chr18	24394104	24395172	1069	-2.58429	4.64667	175.737	9.63599e-12	1.47241e-09	Distal Intergenic	18	24429110	24429170	61	33998	ENSMUSG00000065532	Mir187
Peak_59628	chr7	109191071	109192114	1044	-2.0708	5.02664	175.339	9.84653e-12	1.50127e-09	Distal Intergenic	7	109138565	109175207	36643	-15864	ENSMUSG00000036111	Lmo1
Peak_8866	chr10	109788661	109789074	414	-4.31414	3.26486	175.292	9.87138e-12	1.50175e-09	Intron (uc007gzk.1/260315, intron 2 of 27)	10	109683439	109823619	140181	34545	ENSMUSG00000020181	Nav3
Peak_6925	chr10	47102532	47103098	567	2.8517	4.80264	179.646	9.96806e-12	1.50959e-09	Distal Intergenic	10	46244748	46244770	23	857784	ENSMUSG00000095118	Snord14d
Peak_67892	chrX	51278160	51278838	679	2.68042	4.44299	175.093	9.97886e-12	1.50959e-09	Distal Intergenic	20	51113494	51205990	92497	-72170	ENSMUSG00000036109	Mbnl3
Peak_46926	chr4	67228966	67229708	743	3.06442	4.70892	180.383	9.98835e-12	1.50959e-09	Distal Intergenic	4	66827551	66846581	19031	401415	ENSMUSG00000039005	Tlr4
Peak_3088	chr1	124655871	124656562	692	-3.54008	4.14227	174.932	1.00665e-11	1.51808e-09	Intron (uc007cjy.1/uc007cjy.1, intron 1 of 2)	1	123332138	124045559	713422	-610312	ENSMUSG00000036815	Dpp10
Peak_34942	chr2	7115801	7116308	508	3.57776	4.0521	174.755	1.01641e-11	1.52948e-09	Intron (uc008igv.3/14007, intron 2 of 15)	2	6539699	7081302	541604	-34499	ENSMUSG00000002107	Celf2
Peak_12658	chr11	113188162	113188891	730	2.33464	5.01246	174.689	1.02004e-11	1.53161e-09	Intron (uc007mei.2/72386, intron 1 of 2)	11	113043906	113201838	157933	12947	ENSMUSG00000087259	2610035D17Rik
Peak_60689	chr8	7434434	7434955	522	-3.94111	3.82889	174.627	1.02353e-11	1.53352e-09	Distal Intergenic	8	8617439	8660773	43335	1225818	ENSMUSG00000001300	Efnb2
Peak_31613	chr18	43182637	43183192	556	3.31307	4.03555	174.565	1.02701e-11	1.53541e-09	Distal Intergenic	18	43207697	43317481	109785	-24505	ENSMUSG00000039954	Stk32a
Peak_54135	chr6	38223990	38224852	863	3.0746	4.46399	174.492	1.03109e-11	1.53819e-09	Intron (uc009bjt.2/330286, intron 1 of 19)	6	38137442	38197089	59648	-26901	ENSMUSG00000063455	D630045J12Rik
Peak_50222	chr5	36738560	36739299	740	2.36249	4.92421	174.274	1.0434e-11	1.55048e-09	Distal Intergenic	5	36747374	36748679	1306	9380	ENSMUSG00000060708	Bloc1s4
Peak_27470	chr16	84507502	84508270	769	-3.47777	3.95831	174.247	1.04495e-11	1.55048e-09	Distal Intergenic	16	84371143	84375505	4363	136359	NA	4930553E22Rik
Peak_50383	chr5	41475829	41477090	1262	-2.61791	4.43036	174.228	1.04605e-11	1.55048e-09	Distal Intergenic	5	41624973	41707691	82719	230601	ENSMUSG00000029128	Rab28
Peak_5676	chr10	8898161	8899158	998	3.32319	4.50969	177.002	1.05172e-11	1.55556e-09	Distal Intergenic	10	8813722	8886070	72349	-12091	ENSMUSG00000015305	Sash1
Peak_40453	chr3	17317444	17318061	618	2.70666	4.52073	173.893	1.06536e-11	1.56938e-09	Distal Intergenic	3	17789921	17800071	10151	-471860	ENSMUSG00000100252	Mir124-2hg
Peak_14663	chr12	68599272	68600074	803	-3.17	4.59725	182.431	1.0656e-11	1.56938e-09	Distal Intergenic	12	69157722	69159186	1465	559112	ENSMUSG00000034892	Rps29
Peak_51294	chr5	75346775	75348041	1267	2.92388	5.23826	195.004	1.07651e-11	1.5803e-09	Distal Intergenic	5	75176831	75176904	74	169944	ENSMUSG00000099060	Mir7025
Peak_46382	chr4	48629489	48629881	393	-3.6494	3.28859	173.685	1.07758e-11	1.5803e-09	Intron (uc008svk.1/230157, intron 5 of 9)	4	48610413	48663131	52719	19076	ENSMUSG00000028347	Tmeff1
Peak_26065	chr16	29054262	29054897	636	2.43342	4.51369	173.547	1.08574e-11	1.5889e-09	Distal Intergenic	16	28826176	28929698	103523	-124564	ENSMUSG00000051065	Mb21d2
Peak_43447	chr3	114099396	114099883	488	3.57222	3.63853	173.468	1.09046e-11	1.58928e-09	Exon (uc008rbk.2/12814, exon 11 of 67)	3	114165236	114220756	55521	-65353	ENSMUSG00000027966	Col11a1
Peak_59771	chr7	113715360	113715822	463	-4.41437	3.27081	173.466	1.09059e-11	1.58928e-09	Distal Intergenic	7	113765998	113929876	163879	-50176	ENSMUSG00000038156	Spon1
Peak_27137	chr16	70724617	70725813	1197	-2.26141	5.42033	181.775	1.10187e-11	1.60234e-09	Distal Intergenic	16	70616425	70624822	8398	108192	NA	D16Ertd519e
Peak_61551	chr8	36987161	36987700	540	3.2593	4.49984	175.098	1.10711e-11	1.60659e-09	Exon (uc009llw.1/414128, exon 3 of 3)	8	36993575	36995533	1959	-5875	ENSMUSG00000074384	AI429214
Peak_36335	chr2	53002806	53003137	332	4.2845	3.44773	173.101	1.11262e-11	1.60789e-09	Intron (uc008jrh.1/71409, intron 1 of 26)	2	53108252	53134202	25951	-105115	ENSMUSG00000036053	Fmnl2
Peak_59135	chr7	89254509	89254898	390	3.94695	3.59062	173.077	1.11413e-11	1.60789e-09	Intron (uc009ifw.2/72759, intron 4 of 14)	7	89139721	89338787	199067	83889	ENSMUSG00000039428	Tmem135
Peak_6874	chr10	45087282	45087818	537	3.8599	3.80943	173.063	1.11498e-11	1.60789e-09	Intron (uc007ezx.1/19072, intron 2 of 14)	10	45067214	45158995	91782	20068	ENSMUSG00000019849	Prep
Peak_58665	chr7	72320313	72320836	524	-4.05621	3.60758	173.024	1.11734e-11	1.60795e-09	Distal Intergenic	7	72255339	72306595	51257	-13718	ENSMUSG00000032776	Mctp2
Peak_36526	chr2	59407478	59408162	685	2.69738	4.62778	172.862	1.12738e-11	1.61903e-09	Distal Intergenic	2	59382493	59386682	4190	-20796	ENSMUSG00000087455	5330411J11Rik
Peak_67107	chr9	110909557	110909978	422	4.02777	3.44548	172.774	1.13282e-11	1.62209e-09	Distal Intergenic	9	110914739	110916861	2123	6883	ENSMUSG00000096393	Fam240a
Peak_47764	chr4	99122214	99122688	475	2.88058	4.28125	172.752	1.1342e-11	1.62209e-09	Promoter (1-2kb)	4	98936659	99120915	184257	-1299	ENSMUSG00000028556	Dock7
Peak_58419	chr7	64687750	64688713	964	2.76065	4.53606	172.577	1.14517e-11	1.63441e-09	Intron (uc009hgj.2/11784, intron 3 of 14)	7	64871650	64873040	1391	184327	ENSMUSG00000070520	Nsmce3
Peak_60859	chr8	12394955	12395926	972	-1.83309	5.10744	172.424	1.15486e-11	1.64485e-09	Promoter (<=1kb)	8	12395519	12399555	4037	0	ENSMUSG00000096014	Sox1
Peak_40974	chr3	34722282	34723008	727	3.74758	3.79881	172.361	1.15886e-11	1.64716e-09	Distal Intergenic	3	34709623	34716662	7040	-5620	ENSMUSG00000105153	Gm3143
Peak_15927	chr12	116193224	116193779	556	3.37762	4.35311	172.244	1.16641e-11	1.65449e-09	Distal Intergenic	12	116207050	116213870	6821	20091	ENSMUSG00000042050	Wdr60
Peak_34805	chr2	3420233	3420625	393	3.05012	4.31713	172.143	1.17295e-11	1.66035e-09	Promoter (1-2kb)	2	3409043	3419041	9999	-1192	ENSMUSG00000026650	Meig1
Peak_6647	chr10	39389407	39389994	588	2.85133	4.38774	171.995	1.18251e-11	1.67048e-09	Intron (uc007evx.2/14360, intron 1 of 13)	10	39369799	39565374	195576	19608	ENSMUSG00000019843	Fyn
Peak_38746	chr2	135152956	135154070	1115	2.59621	4.53681	171.76	1.198e-11	1.68811e-09	Intron (uc008mnw.2/18795, intron 3 of 6)	2	135169573	135215616	46044	61546	ENSMUSG00000085247	4930545L23Rik
Peak_62124	chr8	61287795	61288957	1163	1.83588	5.6455	171.718	1.20076e-11	1.68811e-09	Promoter (<=1kb)	8	61281522	61288872	7351	0	ENSMUSG00000099419	1700001D01Rik
Peak_21660	chr14	95113856	95114207	352	-3.71638	3.25045	171.695	1.20231e-11	1.68811e-09	Distal Intergenic	14	95881266	95882775	1510	-767059	ENSMUSG00000034689	4921530L21Rik
Peak_59866	chr7	117435820	117436814	995	2.38722	5.11365	173.059	1.22012e-11	1.70699e-09	Intron (uc009jjl.1/233781, intron 1 of 6)	7	117475492	117549359	73868	-38678	ENSMUSG00000030657	Xylt1
Peak_7377	chr10	64130425	64131098	674	-3.78546	3.43109	171.377	1.22368e-11	1.70699e-09	Intron (uc007fkh.2/216033, intron 7 of 17)	10	64087496	64090255	2760	-40170	ENSMUSG00000042846	Lrrtm3
Peak_6359	chr10	26855763	26856519	757	2.39791	4.96071	171.357	1.22503e-11	1.70699e-09	Intron (uc007ese.1/73910, intron 4 of 14)	10	26772512	26918648	146137	83251	ENSMUSG00000039031	Arhgap18
Peak_26426	chr16	40504202	40504833	632	-2.96417	4.46703	171.348	1.22562e-11	1.70699e-09	Intron (uc007zfq.1/uc007zfq.1, intron 2 of 2)	16	39984371	42176292	2191922	519831	ENSMUSG00000061080	Lsamp
Peak_12445	chr11	105031041	105031482	442	4.62607	3.49292	171.308	1.22835e-11	1.70736e-09	Distal Intergenic	11	105066835	105106467	39633	-35353	ENSMUSG00000020690	Efcab3
Peak_35401	chr2	22780908	22781523	616	3.27271	3.74529	171.204	1.23548e-11	1.71382e-09	Intron (uc008inl.2/54519, intron 1 of 4)	2	22774327	22875653	101327	6581	ENSMUSG00000026786	Apbb1ip
Peak_20404	chr14	47341803	47342453	651	3.69363	3.93274	171.118	1.24141e-11	1.7186e-09	Distal Intergenic	14	47373860	47386167	12308	-31407	ENSMUSG00000050335	Lgals3
Peak_19306	chr13	114838432	114839520	1089	1.74398	6.02251	172.881	1.24878e-11	1.72207e-09	Exon (uc007rxw.1/16398, exon 28 of 30)	13	114818237	114829420	11184	20195	ENSMUSG00000015536	Mocs2
Peak_36217	chr2	50761134	50761699	566	3.80995	3.85034	171.009	1.24889e-11	1.72207e-09	Distal Intergenic	2	50909684	50911846	2163	-147985	ENSMUSG00000083270	Gm13498
Peak_42996	chr3	101236808	101237905	1098	2.48843	4.75841	170.896	1.25681e-11	1.72956e-09	Distal Intergenic	3	101275908	101287939	12032	50034	ENSMUSG00000027863	Cd2
Peak_25254	chr15	101277249	101278190	942	2.51235	6.06501	205.976	1.27034e-11	1.74431e-09	Distal Intergenic	15	101284301	101290934	6634	-6111	ENSMUSG00000037204	Atg101
Peak_40989	chr3	35152150	35152670	521	3.05784	3.95976	170.671	1.27258e-11	1.74431e-09	Distal Intergenic	3	34922545	34922651	107	-229499	ENSMUSG00000098862	Mir6378
Peak_46401	chr4	49178817	49179245	429	3.80404	3.84258	170.335	1.29663e-11	1.77378e-09	Intron (uc008svo.1/272031, intron 1 of 3)	4	49059462	49340261	280800	119355	ENSMUSG00000063446	Plppr1
Peak_50656	chr5	50915749	50916617	869	-2.59566	4.23973	170.233	1.30403e-11	1.78037e-09	Distal Intergenic	5	51454249	51553921	99673	637304	ENSMUSG00000029167	Ppargc1a
Peak_38939	chr2	140763180	140763791	612	3.25304	4.15759	170.141	1.31072e-11	1.7806e-09	Intron (uc008mpu.1/72899, intron 3 of 3)	2	140658198	140671476	13279	-91704	ENSMUSG00000051379	Flrt3
Peak_27642	chr16	90011558	90012301	744	3.29733	4.24427	170.104	1.31341e-11	1.7806e-09	Intron (uc007zvw.2/21844, intron 2 of 11)	16	89787111	89974699	187589	-36859	ENSMUSG00000002489	Tiam1
Peak_28390	chr17	26705651	26706285	635	4.01742	3.45187	170.078	1.31536e-11	1.7806e-09	Distal Intergenic	17	26715650	26743131	27482	-9365	ENSMUSG00000048249	Crebrf
Peak_13433	chr12	17621430	17621894	465	-3.51027	3.42351	170.04	1.31812e-11	1.7806e-09	Distal Intergenic	12	17690814	17786548	95735	-68920	ENSMUSG00000071379	Hpcal1
Peak_38651	chr2	132449324	132449715	392	-3.97909	3.48264	170.017	1.31985e-11	1.7806e-09	Intron (uc029uev.1/70845, intron 3 of 3)	2	132424741	132452499	27759	24583	ENSMUSG00000027345	4921508D12Rik
Peak_66503	chr9	92512716	92513263	548	3.64888	3.71711	170.006	1.32063e-11	1.7806e-09	Distal Intergenic	9	92542223	92608427	66205	-28960	ENSMUSG00000032374	Plod2
Peak_36916	chr2	70202141	70203274	1134	-2.18337	4.57911	169.985	1.3222e-11	1.7806e-09	Intron (uc008jzd.2/329421, intron 9 of 34)	2	70289342	70429195	139854	-86068	ENSMUSG00000042064	Myo3b
Peak_46099	chr4	36368926	36369447	522	-3.79033	3.78433	169.932	1.32608e-11	1.78235e-09	Intron (uc008sha.2/242384, intron 3 of 8)	4	36645373	36645453	81	276006	ENSMUSG00000077851	Mir876
Peak_29006	chr17	48887563	48888430	868	2.83916	4.25415	169.891	1.32913e-11	1.78299e-09	Distal Intergenic	17	48932582	49097590	165009	-44152	ENSMUSG00000040490	Lrfn2
Peak_10312	chr11	29924075	29924679	605	-3.4207	3.65341	169.834	1.33337e-11	1.78522e-09	Intron (uc007ihq.1/237711, intron 2 of 41)	11	29822395	29825668	3274	-98407	ENSMUSG00000078157	4931440F15Rik
Peak_61601	chr8	40436809	40437379	571	3.63514	4.04351	169.774	1.33788e-11	1.7878e-09	Intron (uc009lmn.1/70546, intron 1 of 7)	8	40423840	40484842	61003	12969	ENSMUSG00000039470	Zdhhc2
Peak_24906	chr15	90624238	90624633	396	4.28921	3.49856	169.711	1.34259e-11	1.79063e-09	Intron (uc007xhn.1/66871, intron 3 of 19)	15	90487481	90679388	191908	54755	ENSMUSG00000052560	Cpne8
Peak_23043	chr15	27976906	27977404	499	3.60745	4.08724	169.654	1.34687e-11	1.79289e-09	Intron (uc007vjw.1/223435, intron 1 of 56)	15	27730649	28025848	295200	48444	ENSMUSG00000022263	Trio
Peak_1829	chr1	71786100	71786614	515	4.02994	3.53901	169.593	1.35148e-11	1.79557e-09	Distal Intergenic	1	71888112	71891204	3093	-101498	ENSMUSG00000099707	Gm8883
Peak_25005	chr15	94254130	94255148	1019	-2.47365	4.29175	169.514	1.35749e-11	1.80011e-09	Exon (uc029suw.1/328594, exon 3 of 4)	15	94247202	94255606	8405	6928	NA	D630010B17Rik
Peak_44206	chr3	133708015	133708503	489	2.99698	4.0407	169.069	1.39175e-11	1.84201e-09	Distal Intergenic	3	133463677	133544390	80714	-163625	ENSMUSG00000040943	Tet2
Peak_60777	chr8	10458142	10458707	566	3.85388	3.59957	168.926	1.40293e-11	1.85325e-09	Intron (uc009kus.3/244281, intron 20 of 34)	8	10272534	10634742	362209	185608	ENSMUSG00000039057	Myo16
Peak_65481	chr9	56589695	56590326	632	3.26117	4.08567	168.885	1.40616e-11	1.85355e-09	Distal Intergenic	9	56618464	56635648	17185	45322	ENSMUSG00000049556	Lingo1
Peak_31697	chr18	45606269	45606843	575	2.86006	4.32533	168.801	1.41286e-11	1.85355e-09	Intron (uc008evd.2/140492, intron 6 of 10)	18	45559351	45685883	126533	46918	ENSMUSG00000054477	Kcnn2
Peak_2420	chr1	89136934	89137746	813	3.56616	4.66372	183.956	1.41535e-11	1.85355e-09	5' UTR	1	89070462	89153793	83332	66472	ENSMUSG00000036206	Sh3bp4
Peak_47062	chr4	74322254	74322822	569	3.6303	4.2957	171.473	1.41742e-11	1.85355e-09	Intron (uc012dgi.1/76804, intron 8 of 21)	4	74251879	74405864	153986	70375	ENSMUSG00000028397	Kdm4c
Peak_31989	chr18	55122070	55122763	694	3.61286	3.89191	168.731	1.41838e-11	1.85355e-09	Distal Intergenic	18	54944882	54992591	47710	-129479	ENSMUSG00000052713	Zfp608
Peak_55859	chr6	103600311	103600710	400	3.38284	3.74176	168.711	1.41998e-11	1.85355e-09	Intron (uc009dcj.1/12661, intron 2 of 26)	6	103511330	103691677	180348	88981	ENSMUSG00000030077	Chl1
Peak_66764	chr9	100573267	100573648	382	3.64884	3.65685	168.687	1.4219e-11	1.85355e-09	Promoter (2-3kb)	9	100552188	100571085	18898	-2182	ENSMUSG00000070287	Slc35g2
Peak_13744	chr12	33008273	33008761	489	3.84071	3.92095	168.649	1.42498e-11	1.85408e-09	Distal Intergenic	12	33059686	33061796	2111	53035	ENSMUSG00000035860	Cdhr3
Peak_57197	chr6	146438467	146439394	928	2.94426	4.35341	168.602	1.42875e-11	1.85549e-09	Intron (uc009erw.2/16439, intron 2 of 56)	6	146108299	146502223	393925	62829	ENSMUSG00000030287	Itpr2
Peak_11926	chr11	88146058	88146986	929	3.70194	4.16765	169.115	1.43815e-11	1.86272e-09	Intron (uc007kvg.2/103841, intron 1 of 5)	11	88162261	88194140	31880	-15275	ENSMUSG00000018378	Cuedc1
Peak_32516	chr18	69030300	69030703	404	-4.23834	2.98725	168.466	1.43969e-11	1.86272e-09	Distal Intergenic	18	69022199	69022273	75	-8027	ENSMUSG00000098366	Mir145b
Peak_28949	chr17	47545702	47546352	651	3.286	4.31276	168.376	1.447e-11	1.86868e-09	Intron (uc008cvk.1/12445, intron 1 of 6)	17	47505051	47599688	94638	40651	ENSMUSG00000034165	Ccnd3
Peak_45936	chr4	32137988	32138578	591	-3.38411	3.60299	168.278	1.45503e-11	1.87555e-09	Distal Intergenic	4	32238950	32563367	324418	-100372	ENSMUSG00000040270	Bach2
Peak_64785	chr9	31097130	31098156	1027	2.50245	4.5649	168.019	1.4764e-11	1.89957e-09	Exon (uc009ori.1/19143, exon 12 of 19)	9	31066753	31075885	9133	30377	ENSMUSG00000047412	Zbtb44
Peak_63928	chr8	123096962	123097635	674	4.95927	3.96524	176.025	1.48675e-11	1.90934e-09	3' UTR	8	123102350	123105242	2893	-4715	ENSMUSG00000000740	Rpl13
Peak_37623	chr2	101420212	101420874	663	-3.69728	4.03509	168.882	1.49509e-11	1.91648e-09	Distal Intergenic	2	101560781	101621046	60266	200172	ENSMUSG00000027165	B230118H07Rik
Peak_38884	chr2	138688106	138688613	508	-3.20521	3.95837	167.732	1.50058e-11	1.91997e-09	Distal Intergenic	2	138819929	138820007	79	-131316	ENSMUSG00000088983	Mir1952
Peak_10816	chr11	46309445	46310115	671	2.78063	4.69917	168.059	1.50936e-11	1.92764e-09	Promoter (2-3kb)	11	46193849	46312358	118510	2243	ENSMUSG00000020340	Cyfip2
Peak_59758	chr7	113277156	113277892	737	3.38225	4.08671	167.541	1.51683e-11	1.93362e-09	Promoter (2-3kb)	7	113280650	113295593	14944	-2758	ENSMUSG00000055116	Arntl
Peak_18167	chr13	81831868	81832218	351	3.38226	3.52958	167.36	1.53245e-11	1.94994e-09	Distal Intergenic	13	81783292	81797157	13866	48576	ENSMUSG00000021537	Cetn3
Peak_32004	chr18	55547563	55548389	827	-2.37664	4.76908	167.283	1.53916e-11	1.9529e-09	Distal Intergenic	18	54944882	54992591	47710	-554972	ENSMUSG00000052713	Zfp608
Peak_62626	chr8	77750425	77750997	573	-3.60699	3.3632	167.268	1.54043e-11	1.9529e-09	Intron (uc009mhu.1/uc009mhu.1, intron 5 of 7)	8	77669694	77724452	54759	-25973	ENSMUSG00000031616	Ednra
Peak_54513	chr6	53884887	53885550	664	2.74577	4.48287	167.204	1.54604e-11	1.95644e-09	Intron (uc009bzm.3/71287, intron 11 of 11)	6	53815468	53820825	5358	-64062	ENSMUSG00000043496	Tril
Peak_31944	chr18	54118905	54119767	863	-2.66156	4.44874	167.132	1.55238e-11	1.95955e-09	Distal Intergenic	18	53862113	53955684	93572	256792	ENSMUSG00000073563	Csnk1g3
Peak_16471	chr13	20041165	20041828	664	2.39188	4.84061	167.08	1.55697e-11	1.95955e-09	Distal Intergenic	13	20090507	20263093	172587	-48679	ENSMUSG00000041112	Elmo1
Peak_627	chr1	30537063	30537956	894	-2.99871	4.53482	170.224	1.557e-11	1.95955e-09	Distal Intergenic	1	30802342	30863256	60915	325300	ENSMUSG00000048874	Phf3
Peak_1471	chr1	59037650	59038180	531	3.16616	4.25374	166.915	1.5716e-11	1.96943e-09	Distal Intergenic	1	59050506	59069842	19337	31662	ENSMUSG00000072295	Als2cr11
Peak_64452	chr9	20534391	20534866	476	3.97399	3.41616	166.909	1.57213e-11	1.96943e-09	Distal Intergenic	9	20495069	20521419	26351	-12972	ENSMUSG00000060510	Zfp266
Peak_27511	chr16	85586140	85586535	396	3.45054	3.47969	166.872	1.5754e-11	1.96943e-09	Distal Intergenic	16	85456244	85550709	94466	-35431	ENSMUSG00000041134	Cyyr1
Peak_4822	chr1	174550352	174550770	419	3.27145	3.87782	166.863	1.57623e-11	1.96943e-09	Intron (uc007dtd.2/54418, intron 2 of 17)	1	174501825	174822729	320905	48527	ENSMUSG00000028354	Fmn2
Peak_8499	chr10	97492478	97492994	517	-3.67493	3.83196	166.748	1.58654e-11	1.97733e-09	Intron (uc007gwx.3/13179, intron 2 of 7)	10	97482331	97518163	35833	10147	ENSMUSG00000019929	Dcn
Peak_13840	chr12	35231939	35232812	874	-3.32237	4.19392	166.729	1.58826e-11	1.97733e-09	Distal Intergenic	12	35085939	35147477	61539	146000	ENSMUSG00000020590	Snx13
Peak_38835	chr2	137457191	137457861	671	2.96676	3.97827	166.511	1.60803e-11	1.99835e-09	Distal Intergenic	2	137081451	137116520	35070	-340671	ENSMUSG00000027276	Jag1
Peak_6151	chr10	21784883	21785466	584	2.93015	4.1495	166.216	1.63532e-11	2.02862e-09	Distal Intergenic	10	21690845	21693978	3134	94038	ENSMUSG00000056716	Gm5420
Peak_56872	chr6	137433568	137434388	821	2.47647	5.32477	178.013	1.6395e-11	2.03016e-09	Intron (uc009emv.2/19277, intron 19 of 26)	6	137410721	137464633	53913	22847	ENSMUSG00000030223	Ptpro
Peak_43175	chr3	105512324	105512841	518	3.39966	3.97901	166.093	1.64678e-11	2.03094e-09	Intron (uc008qux.1/56543, intron 2 of 4)	3	105458739	105674002	215264	53585	ENSMUSG00000040896	Kcnd3
Peak_18267	chr13	84565699	84566676	978	-2.15641	5.27954	168.617	1.6486e-11	2.03094e-09	Distal Intergenic	13	84222296	84295966	73671	343403	ENSMUSG00000035762	Tmem161b
Peak_30889	chr18	21272654	21273412	759	2.21037	5.17522	166.07	1.64893e-11	2.03094e-09	Intron (uc008efg.1/381126, intron 1 of 5)	18	21127342	21300139	172798	26727	ENSMUSG00000042680	Garem1
Peak_37732	chr2	103639878	103640296	419	3.54441	3.68697	165.904	1.66463e-11	2.04664e-09	Intron (uc008lix.1/99382, intron 1 of 16)	2	103566310	103718423	152114	73568	ENSMUSG00000032724	Abtb2
Peak_1152	chr1	50865210	50865777	568	3.77721	3.66269	165.622	1.69165e-11	2.07054e-09	Distal Intergenic	1	50909962	50979920	69959	-44185	ENSMUSG00000026109	Tmeff2
Peak_30688	chr18	13134524	13135014	491	3.29421	4.21558	165.619	1.69194e-11	2.07054e-09	Distal Intergenic	18	13006990	13022882	15893	127534	ENSMUSG00000037346	Hrh4
Peak_38579	chr2	130818845	130819538	694	3.29013	4.53935	171.496	1.69304e-11	2.07054e-09	Intron (uc008mjw.2/228602, intron 3 of 36)	2	130801966	130804101	2136	-14744	NA	Gm14057
Peak_59872	chr7	117509933	117510550	618	3.11141	4.18279	165.32	1.72116e-11	2.10121e-09	Intron (uc009jjl.1/233781, intron 2 of 6)	7	117475492	117549359	73868	34441	ENSMUSG00000030657	Xylt1
Peak_15443	chr12	98014721	98015288	568	-3.02494	3.6783	165.264	1.72671e-11	2.10427e-09	Distal Intergenic	12	98202300	98259459	57160	244171	ENSMUSG00000021003	Galc
Peak_36963	chr2	71527989	71528689	701	-3.22171	3.91378	164.922	1.76086e-11	2.14095e-09	Promoter (<=1kb)	2	71529445	71533981	4537	-756	ENSMUSG00000041911	Dlx1
Peak_41447	chr3	52520159	52521045	887	2.58431	5.40912	183.192	1.76299e-11	2.14095e-09	Intron (uc008pej.1/uc008pej.1, intron 1 of 4)	3	52739724	52776654	36931	-218679	ENSMUSG00000102785	Gm2447
Peak_31083	chr18	25770829	25771360	532	-3.76921	3.46125	164.854	1.76773e-11	2.14294e-09	Distal Intergenic	18	25677880	25753983	76104	-16846	ENSMUSG00000024268	Celf4
Peak_46996	chr4	70463145	70463613	469	3.66914	3.83271	164.712	1.78219e-11	2.15476e-09	Intron (uc008tib.1/230316, intron 2 of 5)	4	70216855	70410435	193581	-52710	ENSMUSG00000039298	Cdk5rap2
Peak_64849	chr9	32735601	32736148	548	4.20181	3.8807	165.338	1.78647e-11	2.15476e-09	Intron (uc009osb.1/23871, intron 5 of 7)	9	32696042	32757820	61779	39559	ENSMUSG00000032035	Ets1
Peak_3804	chr1	144415130	144416230	1101	-3.5252	4.08687	165.495	1.78681e-11	2.15476e-09	Distal Intergenic	1	144519690	144567667	47978	151437	ENSMUSG00000098509	Rgs21
Peak_423	chr1	21052033	21053427	1395	1.68274	6.06215	165.793	1.81458e-11	2.18444e-09	Intron (uc007alg.2/170829, intron 1 of 10)	1	21001397	21079225	77829	25798	ENSMUSG00000041779	Tram2
Peak_59818	chr7	115371044	115371685	642	2.99653	4.17372	163.992	1.85761e-11	2.22549e-09	Distal Intergenic	7	114951274	114983967	32694	419770	ENSMUSG00000108379	A730082K24Rik
Peak_62241	chr8	66363169	66364014	846	-3.09939	4.09419	163.985	1.85829e-11	2.22549e-09	Intron (uc009lvj.2/72925, intron 5 of 8)	8	66386301	66471637	85337	-22287	ENSMUSG00000036469	2020-03-01
Peak_26714	chr16	50309184	50309881	698	2.31194	5.24496	169.064	1.85833e-11	2.22549e-09	Intron (uc007zkn.2/70508, intron 1 of 14)	16	50191844	50330993	139150	21112	ENSMUSG00000022641	Bbx
Peak_15083	chr12	81971587	81972328	742	3.40935	4.0821	163.859	1.87189e-11	2.23786e-09	Intron (uc007ocq.1/54604, intron 20 of 35)	12	81975797	82000924	25128	-3469	ENSMUSG00000021140	Pcnx
Peak_57681	chr7	28418070	28418640	571	3.46073	3.68801	163.743	1.88447e-11	2.24902e-09	Intron (uc009fyw.2/233033, intron 2 of 12)	7	28407231	28414342	7112	-3728	ENSMUSG00000109336	Samd4b
Peak_32100	chr18	58324351	58325359	1009	-2.90981	4.06569	163.627	1.89711e-11	2.25271e-09	Distal Intergenic	18	58008623	58209926	201304	-114425	ENSMUSG00000024598	Fbn2
Peak_40031	chr2	178158858	178159529	672	2.28419	5.00523	163.604	1.89964e-11	2.25271e-09	Intron (uc008ohj.2/74189, intron 1 of 12)	2	178175349	178338492	163144	-15820	ENSMUSG00000027525	Phactr3
Peak_6686	chr10	40170132	40170686	555	-3.85818	3.83626	163.597	1.90039e-11	2.25271e-09	Distal Intergenic	10	40075402	40142254	66853	-27878	ENSMUSG00000019838	Slc16a10
Peak_31075	chr18	25680649	25681076	428	3.54224	3.91152	163.595	1.90058e-11	2.25271e-09	Intron (uc008ehk.2/108013, intron 1 of 11)	18	25477620	25753983	276364	72907	ENSMUSG00000024268	Celf4
Peak_63303	chr8	100206548	100207347	800	-3.05007	3.93568	163.528	1.90798e-11	2.25761e-09	Distal Intergenic	8	99416674	99733438	316765	789874	ENSMUSG00000052479	A330008L17Rik
Peak_9202	chr10	119735091	119736146	1056	-2.47452	4.37945	163.447	1.91691e-11	2.26299e-09	Intron (uc007heg.2/74053, intron 1 of 21)	10	119746062	119761699	15638	25553	ENSMUSG00000084764	Grip1os2
Peak_51406	chr5	81218519	81219164	646	2.81618	4.61239	163.428	1.91907e-11	2.26299e-09	Intron (uc008xwi.1/319387, intron 3 of 5)	5	81021593	81795730	774138	196926	ENSMUSG00000037605	Adgrl3
Peak_53126	chr5	151409270	151409697	428	-3.5739	3.39378	163.251	1.93876e-11	2.28232e-09	Promoter (2-3kb)	5	151406504	151432118	25615	2766	ENSMUSG00000097321	Gm3704
Peak_64216	chr9	8059581	8060094	514	3.52607	4.06058	163.185	1.94622e-11	2.28722e-09	Distal Intergenic	9	8021672	8042823	21152	-16758	ENSMUSG00000053070	9230110C19Rik
Peak_5165	chr1	184820785	184821185	401	4.06731	3.669	163.111	1.95454e-11	2.29311e-09	Promoter (1-2kb)	1	184822407	184822488	82	1303	ENSMUSG00000088559	Mir1981
Peak_43223	chr3	107125510	107125913	404	3.98093	3.33959	163.048	1.96172e-11	2.29588e-09	Distal Intergenic	3	107101567	107115005	13439	23943	ENSMUSG00000040724	Kcna2
Peak_51867	chr5	101425883	101426776	894	2.21507	4.90963	163.011	1.96589e-11	2.29588e-09	Distal Intergenic	5	101659197	101664711	5515	237935	ENSMUSG00000035187	Nkx6-1
Peak_32162	chr18	60653702	60654506	805	3.92177	4.56696	182.204	1.96686e-11	2.29588e-09	Distal Intergenic	18	60663410	60671624	8215	-8904	NA	G630071F17Rik
Peak_43166	chr3	105408209	105408665	457	-4.01766	3.46283	162.921	1.97622e-11	2.30293e-09	Distal Intergenic	3	105441595	105451727	10133	43062	ENSMUSG00000074346	Kcnd3os
Peak_25867	chr16	22872134	22873001	868	3.55297	4.08267	162.708	2.00078e-11	2.32763e-09	3' UTR	16	22857845	22879634	21790	14289	ENSMUSG00000004460	Dnajb11
Peak_54612	chr6	55690132	55690650	519	3.14338	4.06881	162.318	2.0466e-11	2.37694e-09	Intron (uc009caw.1/100041339, intron 2 of 2)	6	55684571	55694574	10004	5561	ENSMUSG00000108063	Gm3279
Peak_1574	chr1	62914368	62914979	612	-3.68	3.5489	162.268	2.05265e-11	2.37997e-09	Distal Intergenic	1	62790918	62794732	3815	-119636	NA	4930487H11Rik
Peak_23355	chr15	38198675	38200003	1329	-1.91501	4.90081	162.141	2.06779e-11	2.39257e-09	Distal Intergenic	15	38219203	38226735	7533	-19200	ENSMUSG00000061923	Odf1
Peak_59011	chr7	82221454	82222185	732	2.99167	4.32202	162.12	2.07042e-11	2.39257e-09	Distal Intergenic	7	82259908	82307420	47513	-37723	ENSMUSG00000030638	Sh3gl3
Peak_53544	chr6	17171530	17172396	867	2.51458	5.39585	178.249	2.09059e-11	2.41184e-09	Exon (uc009azj.1/uc009azj.1, exon 1 of 3)	6	17197751	17205695	7945	-25355	ENSMUSG00000085171	D830026I12Rik
Peak_49063	chr4	148018373	148019210	838	3.17805	4.38567	162.313	2.12208e-11	2.4441e-09	5' UTR	4	148004259	148024215	19957	5005	ENSMUSG00000029016	Clcn6
Peak_40689	chr3	27607155	27608264	1110	1.99739	5.25581	161.661	2.1265e-11	2.44513e-09	Intron (uc008otq.2/72007, intron 4 of 26)	3	27584900	27584995	96	-22160	ENSMUSG00000092695	Mir3092
Peak_65653	chr9	62162776	62163492	717	3.4648	3.87951	161.513	2.14496e-11	2.46226e-09	Distal Intergenic	9	62057249	62122609	65361	-40167	ENSMUSG00000032252	Glce
Peak_45607	chr4	16002608	16003118	511	2.80212	4.23703	161.37	2.16297e-11	2.47882e-09	Promoter (<=1kb)	4	15997121	16002121	5001	-487	ENSMUSG00000041153	Osgin2
Peak_53242	chr6	6603468	6604503	1036	-2.48418	4.25817	161.332	2.16787e-11	2.48033e-09	Distal Intergenic	6	6558275	6578658	20384	-24810	ENSMUSG00000042541	Sem1
Peak_481	chr1	22713916	22714305	390	4.14995	3.58206	161.168	2.18877e-11	2.49756e-09	Intron (uc029qnm.1/116837, intron 2 of 14)	1	22468191	22805724	337534	91419	ENSMUSG00000041670	Rims1
Peak_64842	chr9	32668060	32668624	565	2.8927	4.2967	161.157	2.19015e-11	2.49756e-09	Intron (uc009osa.1/23871, intron 3 of 3)	9	32696042	32757820	61779	-27418	ENSMUSG00000032035	Ets1
Peak_22347	chr14	121566659	121567374	716	2.51284	4.72788	161.112	2.1959e-11	2.50001e-09	Intron (uc007vai.1/105445, intron 10 of 17)	14	121542039	121592444	50406	25070	ENSMUSG00000025558	Dock9
Peak_20777	chr14	59736875	59737691	817	-2.40652	4.60153	161.052	2.20359e-11	2.50463e-09	Intron (uc007uet.1/50769, intron 32 of 35)	14	59647741	59685041	37301	-51834	ENSMUSG00000021983	Atp8a2
Peak_36153	chr2	49417909	49418597	689	3.82222	4.19191	165.531	2.22326e-11	2.52285e-09	Distal Intergenic	2	49451486	49551609	100124	-32889	ENSMUSG00000069495	Epc2
Peak_868	chr1	38401807	38402310	504	3.91763	3.88828	160.567	2.26723e-11	2.56854e-09	Intron (uc007ast.2/16764, intron 5 of 21)	1	38175991	38627244	451254	224934	ENSMUSG00000037138	Aff3
Peak_22417	chr14	123065126	123066007	882	-2.67088	4.65384	161.808	2.27138e-11	2.56904e-09	Distal Intergenic	14	122932485	122983261	50777	-81865	ENSMUSG00000041594	Tmtc4
Peak_44124	chr3	131662418	131663267	850	2.9588	4.55347	161.953	2.27527e-11	2.56924e-09	Distal Intergenic	3	131566032	131643671	77640	96386	ENSMUSG00000028032	Papss1
Peak_14619	chr12	66055247	66055797	551	3.25497	3.79448	160.38	2.29231e-11	2.58426e-09	Distal Intergenic	12	66283379	66284401	1023	228604	ENSMUSG00000060499	Rpl10l
Peak_15262	chr12	87365539	87366041	503	3.7776	3.62108	160.304	2.30255e-11	2.59158e-09	Intron (uc007oiw.2/20773, intron 2 of 11)	12	87305058	87343848	38791	-21691	ENSMUSG00000021036	Sptlc2
Peak_3936	chr1	152008416	152009019	604	2.92688	3.84313	160.262	2.30828e-11	2.59382e-09	Intron (uc007czd.2/69399, intron 1 of 6)	1	151852403	152090320	237918	81301	ENSMUSG00000032666	1700025G04Rik
Peak_676	chr1	32872767	32873395	629	2.827	4.06281	160.188	2.31833e-11	2.60088e-09	Distal Intergenic	1	32543546	32547293	3748	-325474	ENSMUSG00000091318	Gm5415
Peak_8722	chr10	105531029	105531743	715	-2.87398	4.49173	161.365	2.33062e-11	2.61044e-09	Intron (uc007gym.1/278279, intron 1 of 11)	10	105187664	105574479	386816	42736	ENSMUSG00000036019	Tmtc2
Peak_21403	chr14	79203392	79203934	543	1.86795	5.32271	159.941	2.35237e-11	2.63055e-09	Distal Intergenic	14	79212355	79247367	35013	43433	ENSMUSG00000071262	Zfp957
Peak_26378	chr16	38673208	38674168	961	1.98919	5.36779	159.841	2.36627e-11	2.64183e-09	Intron (uc007zfg.1/12549, intron 1 of 11)	16	38598343	38713035	114693	38867	ENSMUSG00000022799	Arhgap31
Peak_56051	chr6	112026332	112027119	788	-2.38798	4.23838	159.782	2.37451e-11	2.64676e-09	Distal Intergenic	6	112210708	112212518	1811	-183589	ENSMUSG00000100219	1700054K19Rik
Peak_60028	chr7	122349839	122350253	415	4.40764	3.90671	163.915	2.39005e-11	2.65979e-09	Intron (uc009jot.2/18751, intron 2 of 16)	7	122289125	122634401	345277	60714	ENSMUSG00000052889	Prkcb
Peak_21102	chr14	70317282	70317623	342	3.89579	3.60488	159.393	2.4297e-11	2.69958e-09	3' UTR	14	70217865	70289497	71633	-27785	ENSMUSG00000022092	Ppp3cc
Peak_3053	chr1	121709281	121709807	527	3.4379	3.95701	159.328	2.43897e-11	2.70554e-09	Distal Intergenic	1	121553835	121567980	14146	-141301	ENSMUSG00000001674	Ddx18
Peak_20714	chr14	57412223	57412667	445	3.43856	3.77848	159.225	2.45393e-11	2.71778e-09	Distal Intergenic	14	57424071	57517936	93866	-11404	ENSMUSG00000040040	Ift88
Peak_47165	chr4	81124080	81124679	600	-3.16824	3.98579	159.082	2.47474e-11	2.73644e-09	Distal Intergenic	4	80910686	80954301	43616	213394	ENSMUSG00000048706	Lurap1l
Peak_23150	chr15	32002827	32003445	619	-2.51313	4.97554	166.508	2.4816e-11	2.73966e-09	Distal Intergenic	15	32177289	32178294	1006	-173844	ENSMUSG00000045267	Tas2r119
Peak_36879	chr2	69054246	69054864	619	2.56845	4.43482	159.004	2.48626e-11	2.74043e-09	Intron (uc008jxs.1/241447, intron 6 of 9)	2	69135800	69189329	53530	-80936	ENSMUSG00000034738	Nostrin
Peak_52949	chr5	144923275	144923897	623	3.27582	3.89224	158.794	2.51736e-11	2.76773e-09	Intron (uc009alv.1/75788, intron 1 of 17)	5	144896732	144896816	85	-26459	ENSMUSG00000098822	Mir7039
Peak_54613	chr6	55745383	55746024	642	-3.48213	3.77337	158.783	2.51903e-11	2.76773e-09	Distal Intergenic	6	55684571	55694574	10004	60812	ENSMUSG00000108063	Gm3279
Peak_24136	chr15	67249089	67249627	539	2.72129	4.97727	168.657	2.52894e-11	2.77422e-09	Intron (uc029sre.1/69334, intron 2 of 8)	15	67226769	67377094	150326	22320	ENSMUSG00000102069	1700012I11Rik
Peak_61231	chr8	27037280	27037689	410	3.69496	3.31253	158.581	2.54949e-11	2.79234e-09	3' UTR	8	27042555	27049615	7061	-4866	ENSMUSG00000031485	Plpbp
Peak_40571	chr3	21809807	21810462	656	2.29738	4.82331	158.487	2.56365e-11	2.79901e-09	Distal Intergenic	3	22076652	22216594	139943	-266190	ENSMUSG00000027630	Tbl1xr1
Peak_31186	chr18	31217597	31218285	689	3.04131	4.13853	158.487	2.56367e-11	2.79901e-09	Intron (uc008ehx.1/19762, intron 2 of 4)	18	30974314	31317128	342815	98843	ENSMUSG00000057455	Rit2
Peak_44625	chr3	144410972	144411607	636	-3.01675	4.50681	162.876	2.60067e-11	2.83494e-09	Distal Intergenic	3	144434561	144435619	1059	24012	ENSMUSG00000040151	Hs2st1
Peak_47750	chr4	98593973	98594358	386	4.14825	3.4974	158.206	2.60682e-11	2.83718e-09	Intron (uc008tuc.1/12695, intron 29 of 43)	4	98546634	98719603	172970	47339	ENSMUSG00000061859	Patj
Peak_64203	chr9	7796063	7796822	760	-3.76723	4.69455	185.786	2.61174e-11	2.83807e-09	Distal Intergenic	9	7784390	7784440	51	11673	ENSMUSG00000093615	Mir5618
Peak_31248	chr18	33691969	33692561	593	-2.87582	3.89999	158.059	2.62982e-11	2.85323e-09	Distal Intergenic	18	33794892	33795989	1098	-102331	ENSMUSG00000087590	Epb41l4aos
Peak_56902	chr6	137943168	137943636	469	3.56599	3.54543	157.932	2.64976e-11	2.87036e-09	Distal Intergenic	6	137983640	138043600	59961	99964	ENSMUSG00000044378	Slc15a5
Peak_18743	chr13	100989090	100989675	586	3.36584	4.04675	157.899	2.65509e-11	2.87165e-09	Distal Intergenic	13	100802648	100833427	30780	-155663	ENSMUSG00000021629	Slc30a5
Peak_9998	chr11	19107135	19107674	540	-4.11605	3.3491	157.796	2.67139e-11	2.88477e-09	Distal Intergenic	11	19065275	19075740	10466	41860	ENSMUSG00000086025	4933406G16Rik
Peak_29534	chr17	67133375	67134072	698	2.28675	4.87492	157.691	2.68821e-11	2.89303e-09	Intron (uc008dka.2/19274, intron 2 of 30)	17	67026147	67026235	89	-107140	ENSMUSG00000093508	Mir5709
Peak_42236	chr3	79558746	79559667	922	2.68932	4.73364	159.326	2.69169e-11	2.89303e-09	Intron (uc012cqp.1/329679, intron 1 of 16)	3	79455971	79567679	111709	8012	ENSMUSG00000061175	Fnip2
Peak_10702	chr11	43395014	43395368	355	4.28271	3.13154	157.649	2.69484e-11	2.89303e-09	Distal Intergenic	11	43374397	43374461	65	-20553	ENSMUSG00000065601	Mir146
Peak_45624	chr4	18046521	18047472	952	-2.87248	4.7343	165.575	2.69575e-11	2.89303e-09	Intron (uc008sbu.2/17389, intron 5 of 11)	4	17853458	18118734	265277	193063	ENSMUSG00000028226	Mmp16
Peak_22322	chr14	121062224	121063039	816	-2.17573	4.94839	157.544	2.71193e-11	2.90588e-09	Intron (uc007vaa.1/223254, intron 1 of 26)	14	121035574	121283726	248153	26650	ENSMUSG00000025555	Farp1
Peak_28154	chr17	14468596	14469287	692	3.33059	3.88241	157.34	2.74512e-11	2.92493e-09	Distal Intergenic	17	14399060	14404790	5731	69536	ENSMUSG00000023886	Smoc2
Peak_60351	chr7	135543084	135543416	333	4.12464	3.13633	157.332	2.74638e-11	2.92493e-09	Intron (uc009kee.1/19267, intron 1 of 20)	7	135537824	135686294	148471	5260	ENSMUSG00000041836	Ptpre
Peak_55897	chr6	105847001	105847852	852	2.27999	4.90333	157.326	2.74738e-11	2.92493e-09	Intron (uc009dcr.2/269784, intron 2 of 19)	6	105924769	106674270	749502	-76917	ENSMUSG00000064293	Cntn4
Peak_5519	chr10	3888412	3888954	543	3.78294	3.64563	157.325	2.74759e-11	2.92493e-09	Intron (uc007eho.1/213783, intron 3 of 7)	10	3872667	3967302	94636	15745	ENSMUSG00000040624	Plekhg1
Peak_41865	chr3	65474532	65475039	508	3.42946	4.24309	158.957	2.75084e-11	2.92493e-09	Distal Intergenic	3	65528447	65555518	27072	-53408	ENSMUSG00000034640	Tiparp
Peak_20228	chr14	36502136	36502841	706	2.58493	4.30061	156.99	2.80328e-11	2.97612e-09	Distal Intergenic	14	36094967	36100112	5146	407169	ENSMUSG00000096405	4930474N05Rik
Peak_29774	chr17	73811416	73811825	410	3.77868	3.70225	156.948	2.81036e-11	2.97907e-09	Intron (uc008dnn.2/57440, intron 1 of 5)	17	73804841	73832093	27253	6575	ENSMUSG00000024065	Ehd3
Peak_45010	chr3	154113011	154113616	606	2.88215	3.83255	156.897	2.81899e-11	2.98365e-09	Intron (uc008ruk.1/242259, intron 1 of 21)	3	153973436	154271720	298285	139575	ENSMUSG00000028360	Slc44a5
Peak_22240	chr14	118608934	118609701	768	2.44131	4.97376	159.447	2.82764e-11	2.98824e-09	Intron (uc011zpz.1/239273, intron 13 of 30)	14	118592369	118592472	104	-16462	ENSMUSG00000098433	Mir6391
Peak_51631	chr5	91911474	91912234	761	-3.56031	4.0277	158.39	2.84441e-11	3.00137e-09	Exon (uc008ybx.1/uc008ybx.1, exon 2 of 2)	5	91962389	91966598	4210	-50155	ENSMUSG00000102644	Thap6
Peak_15401	chr12	95119128	95119885	758	-3.16455	3.86542	156.707	2.85124e-11	3.004e-09	Distal Intergenic	12	95692226	95785213	92988	-572341	ENSMUSG00000047414	Flrt2
Peak_8264	chr10	90992224	90992779	556	3.70579	3.52596	156.67	2.85754e-11	3.00607e-09	Intron (uc007gtg.1/11783, intron 26 of 26)	10	90989311	91082743	93433	89964	ENSMUSG00000019979	Apaf1
Peak_47685	chr4	97543967	97544489	523	3.65236	3.79562	156.623	2.86564e-11	3.01001e-09	Distal Intergenic	4	97581943	98118876	536934	-37454	ENSMUSG00000028565	Nfia
Peak_37242	chr2	80731305	80731978	674	2.7641	4.68208	158.761	2.87543e-11	3.01571e-09	Distal Intergenic	2	80639264	80660071	20808	92041	ENSMUSG00000026999	Nup35
Peak_8478	chr10	96980594	96981577	984	-2.6615	4.85726	163.561	2.92485e-11	3.05893e-09	Distal Intergenic	10	97035768	97061059	25292	-54191	ENSMUSG00000111924	4930556N09Rik
Peak_45098	chr3	156992698	156993160	463	3.13427	3.54508	156.279	2.92547e-11	3.05893e-09	Intron (uc008rvb.1/320840, intron 2 of 6)	3	156561794	157316464	754671	430904	ENSMUSG00000040037	Negr1
Peak_30944	chr18	22961775	22962174	400	-3.93588	3.3246	156.197	2.94003e-11	3.06951e-09	Intron (uc008efq.2/319211, intron 1 of 10)	18	22693155	23038663	345509	76489	ENSMUSG00000041923	Nol4
Peak_51418	chr5	81776305	81777114	810	2.81194	4.14717	156.145	2.94927e-11	3.0699e-09	Intron (uc008xwm.1/319387, intron 25 of 26)	5	81660262	81795730	135469	116043	ENSMUSG00000037605	Adgrl3
Peak_60257	chr7	130381436	130382115	680	-3.4607	3.53468	156.145	2.94927e-11	3.0699e-09	Distal Intergenic	7	130196172	130266808	70637	-114628	ENSMUSG00000030849	Fgfr2
Peak_27101	chr16	67850213	67850654	442	-4.09585	3.16093	156.023	2.97098e-11	3.08785e-09	Distal Intergenic	16	66655421	67620908	965488	-229305	ENSMUSG00000064115	Cadm2
Peak_56587	chr6	127417633	127418545	913	-3.02939	3.95487	155.969	2.98067e-11	3.09328e-09	Distal Intergenic	6	127446840	127494239	47400	-28295	ENSMUSG00000037997	Parp11
Peak_17239	chr13	43338751	43339462	712	3.17651	4.05876	155.907	2.99177e-11	3.10015e-09	Distal Intergenic	13	43365506	43395203	29698	-26044	ENSMUSG00000054021	Sirt5
Peak_314	chr1	16546403	16546951	549	-3.28454	3.96822	155.711	3.02743e-11	3.1289e-09	Intron (uc007ajs.2/66799, intron 5 of 6)	1	16459715	16519302	59588	-27101	ENSMUSG00000025920	Stau2
Peak_61013	chr8	18799952	18800489	538	-3.79078	3.70112	155.684	3.03228e-11	3.1289e-09	Intron (uc009kzt.1/244329, intron 13 of 13)	8	18846279	18884413	38135	-45790	ENSMUSG00000031467	Agpat5
Peak_44289	chr3	135840249	135840713	465	3.37477	3.55654	155.68	3.03307e-11	3.1289e-09	Promoter (<=1kb)	3	135833694	135840269	6576	0	ENSMUSG00000106306	4933401H06Rik
Peak_51287	chr5	75162998	75163833	836	3.79873	4.79407	182.542	3.04518e-11	3.13314e-09	Promoter (1-2kb)	5	75161834	75175150	13317	1164	ENSMUSG00000029231	Pdgfra
Peak_42437	chr3	84647371	84647974	604	3.08133	4.20414	155.608	3.04623e-11	3.13314e-09	Intron (uc008pqg.3/99889, intron 3 of 9)	3	84666192	84685665	19474	-18218	ENSMUSG00000056498	Tmem154
Peak_16425	chr13	18768516	18768974	459	2.58236	4.22155	155.557	3.05578e-11	3.1383e-09	Intron (uc007pok.2/218035, intron 4 of 28)	13	18717292	18866811	149520	51224	ENSMUSG00000041236	Vps41
Peak_61212	chr8	26471833	26472411	579	-3.37612	3.53115	155.508	3.06474e-11	3.14283e-09	Distal Intergenic	8	26158169	26164151	5983	313664	ENSMUSG00000037214	Thap1
Peak_47372	chr4	85824090	85824756	667	-3.50617	3.81317	155.434	3.07857e-11	3.15234e-09	Distal Intergenic	4	86053915	86199516	145602	-229159	ENSMUSG00000066113	Adamtsl1
Peak_58071	chr7	46508956	46509857	902	-2.50851	4.34619	155.374	3.08963e-11	3.159e-09	Intron (uc009gyp.2/27414, intron 10 of 10)	7	46396468	46438704	42237	112488	ENSMUSG00000058975	Kcnc1
Peak_58300	chr7	58800906	58801406	501	3.58899	3.38091	155.328	3.09822e-11	3.16159e-09	Intron (uc009hef.2/11982, intron 10 of 20)	7	58658202	58829426	171225	142704	ENSMUSG00000025324	Atp10a
Peak_51034	chr5	66872693	66873035	343	-3.81974	2.98906	155.312	3.1013e-11	3.16159e-09	Intron (uc008xph.1/77569, intron 2 of 25)	5	66968416	66974915	6500	-95381	ENSMUSG00000037736	Limch1
Peak_16892	chr13	31184843	31185752	910	2.90998	4.06439	155.261	3.11081e-11	3.16226e-09	Distal Intergenic	13	31213410	31241086	27677	55334	ENSMUSG00000087460	4930401O12Rik
Peak_31107	chr18	27392543	27393167	625	-3.31481	3.57651	155.223	3.11798e-11	3.16226e-09	Distal Intergenic	18	28560166	28998176	438011	-1166999	NA	4930474G06Rik
Peak_8666	chr10	103448267	103448731	465	3.20252	3.85152	155.218	3.11902e-11	3.16226e-09	Distal Intergenic	10	103367808	103419379	51572	80459	ENSMUSG00000019894	Slc6a15
Peak_42417	chr3	84292089	84292657	569	3.08629	4.23614	155.211	3.12023e-11	3.16226e-09	Intron (uc008ppz.3/80890, intron 1 of 11)	3	84160439	84304775	144337	12118	ENSMUSG00000027993	Trim2
Peak_60837	chr8	11797977	11798722	746	2.8514	4.04631	154.959	3.16837e-11	3.20596e-09	Intron (uc009kvu.2/54126, intron 6 of 17)	8	11782525	11835217	52693	15452	ENSMUSG00000031511	Arhgef7
Peak_15413	chr12	95744295	95744748	454	2.6154	4.30698	154.917	3.17648e-11	3.20596e-09	Intron (uc007olc.2/399558, intron 1 of 1)	12	95692226	95785213	92988	52069	ENSMUSG00000047414	Flrt2
Peak_14598	chr12	65119006	65119545	540	3.94177	3.35855	154.898	3.18e-11	3.20596e-09	Intron (uc007nrf.1/104806, intron 18 of 22)	12	65148722	65152890	4169	33345	ENSMUSG00000047534	Mis18bp1
Peak_53227	chr6	6163083	6163622	540	-2.61559	3.92264	154.863	3.18678e-11	3.20596e-09	Intron (uc009awp.2/50799, intron 3 of 17)	6	6041218	6217173	175956	53551	ENSMUSG00000015112	Slc25a13
Peak_4224	chr1	159768635	159768994	360	-4.06031	3.19094	154.82	3.19518e-11	3.20596e-09	Intron (uc007dea.2/21960, intron 2 of 22)	1	159523769	159924922	401154	244866	ENSMUSG00000015829	Tnr
Peak_1361	chr1	55914210	55914787	578	-3.76585	3.25026	154.818	3.19543e-11	3.20596e-09	Distal Intergenic	1	55931241	55972098	40858	-16454	ENSMUSG00000099950	9130227L01Rik
Peak_15355	chr12	91749764	91750179	416	2.58485	4.18894	154.817	3.19577e-11	3.20596e-09	Intron (uc007okt.2/108800, intron 1 of 6)	12	91735054	91771170	36117	20991	ENSMUSG00000020961	Ston2
Peak_40658	chr3	26850653	26851556	904	2.30004	4.86665	154.754	3.20791e-11	3.21348e-09	Intron (uc008otf.2/70862, intron 5 of 9)	3	26637631	26983212	345582	213022	ENSMUSG00000039335	Spata16
Peak_69097	chrX	163981993	163982543	551	3.00025	3.91025	154.706	3.21733e-11	3.21826e-09	Intron (uc009uvb.2/56078, intron 7 of 7)	20	163950386	163958666	8281	-23327	ENSMUSG00000031370	Zrsr2
Peak_19241	chr13	113586966	113587794	829	1.83829	5.51304	154.658	3.22679e-11	3.22306e-09	Distal Intergenic	13	113592179	113618564	26386	30770	ENSMUSG00000042364	Snx18
Peak_32581	chr18	71365750	71366350	601	3.1444	4.03306	154.548	3.24836e-11	3.23988e-09	Intron (uc008fop.1/13176, intron 20 of 28)	18	70568292	70626131	57840	797458	ENSMUSG00000024513	Mbd2
Peak_31896	chr18	52720358	52720873	516	3.20045	3.97695	154.524	3.25299e-11	3.23988e-09	Distal Intergenic	18	52693679	52695593	1915	26679	ENSMUSG00000053624	Gykl1
Peak_64603	chr9	24461426	24461961	536	2.65905	4.577	154.448	3.26809e-11	3.24977e-09	Intron (uc009opa.3/244745, intron 8 of 22)	9	24412792	24453897	41106	-7529	ENSMUSG00000043067	Dpy19l1
Peak_6612	chr10	38103559	38104044	486	-3.60089	3.30491	154.427	3.2723e-11	3.24977e-09	Distal Intergenic	10	38175774	38181903	6130	-71730	ENSMUSG00000111234	4930591E09Rik
Peak_67704	chrX	23079991	23080563	573	3.02069	3.82383	154.319	3.29395e-11	3.26658e-09	Distal Intergenic	20	23219271	23266802	47532	186239	ENSMUSG00000036782	Klhl13
Peak_58100	chr7	48803182	48803849	668	-3.07138	4.05842	154.152	3.32758e-11	3.29043e-09	Intron (uc009hav.1/243983, intron 4 of 8)	7	48789003	48827437	38435	14179	ENSMUSG00000030471	Zdhhc13
Peak_46993	chr4	70412107	70412511	405	2.12591	4.74272	154.134	3.33121e-11	3.29043e-09	Promoter (1-2kb)	4	70216855	70410435	193581	-1672	ENSMUSG00000039298	Cdk5rap2
Peak_15057	chr12	81002820	81003194	375	-4.78544	2.51592	154.129	3.33227e-11	3.29043e-09	Distal Intergenic	12	81026808	81186414	159607	-23614	ENSMUSG00000021136	Smoc1
Peak_26858	chr16	57252114	57252590	477	3.91867	3.48417	154.014	3.35566e-11	3.30882e-09	Distal Intergenic	16	57207957	57231466	23510	-20648	ENSMUSG00000022749	Tbc1d23
Peak_22431	chr14	123566090	123567093	1004	-3.90381	4.3981	172.402	3.36459e-11	3.3129e-09	Intron (uc007vbq.1/338370, intron 7 of 43)	14	123276641	123627144	350504	60051	ENSMUSG00000000197	Nalcn
Peak_45318	chr4	8430361	8431223	863	-2.99319	4.013	153.912	3.37648e-11	3.31989e-09	Distal Intergenic	4	8535644	8607702	72059	-104421	ENSMUSG00000047187	Rab2a
Peak_51058	chr5	67496744	67497107	364	4.52707	3.50401	153.881	3.38288e-11	3.32146e-09	Distal Intergenic	5	67463898	67477899	14002	32846	ENSMUSG00000107385	C330024D21Rik
Peak_2248	chr1	84387547	84388117	571	2.93218	4.37002	153.849	3.38961e-11	3.32335e-09	Intron (uc007bsw.1/227325, intron 11 of 12)	1	84115332	84341110	225779	-46437	ENSMUSG00000045658	Pid1
Peak_59207	chr7	91672199	91672902	704	2.34908	4.18865	153.766	3.40686e-11	3.33554e-09	Promoter (<=1kb)	7	91672492	91998815	326324	0	ENSMUSG00000052572	Dlg2
Peak_817	chr1	36633865	36634340	476	3.63968	3.67261	153.724	3.41542e-11	3.33823e-09	Intron (uc011wjn.1/381337, intron 5 of 14)	1	36562696	36593332	30637	-40533	ENSMUSG00000046337	Fam178b
Peak_17936	chr13	73446487	73447422	936	1.89063	5.39365	153.694	3.42188e-11	3.33823e-09	Distal Intergenic	13	73467383	73514538	47156	-19961	ENSMUSG00000021608	Lpcat1
Peak_54566	chr6	55009436	55010334	899	2.89204	4.57987	156.302	3.42414e-11	3.33823e-09	Distal Intergenic	6	54985095	54992867	7773	-16569	ENSMUSG00000002797	Ggct
Peak_50245	chr5	37101820	37102416	597	3.72263	3.81701	153.66	3.4289e-11	3.33823e-09	Exon (uc008xfh.1/76071, exon 5 of 6)	5	37050857	37125298	74442	50963	ENSMUSG00000063646	Jakmip1
Peak_13696	chr12	31817948	31818537	590	3.47453	4.0329	153.445	3.4742e-11	3.37759e-09	Intron (uc007nhs.1/238123, intron 10 of 22)	12	31706867	31713926	7060	-104022	ENSMUSG00000044067	Gpr22
Peak_3097	chr1	125388498	125388927	430	3.52347	3.33577	153.32	3.50085e-11	3.39872e-09	Distal Intergenic	1	125392905	125435727	42823	46800	ENSMUSG00000026341	Actr3
Peak_18681	chr13	99283977	99285115	1139	2.52952	4.39194	153.117	3.5447e-11	3.43647e-09	Distal Intergenic	13	99319649	99344678	25030	59563	ENSMUSG00000021650	Ptcd2
Peak_34530	chr19	49808226	49808690	465	3.43791	3.76316	153.008	3.56835e-11	3.45456e-09	Distal Intergenic	19	50147661	50252713	105053	444023	ENSMUSG00000043531	Sorcs1
Peak_67222	chr9	115426570	115427122	553	-3.647	3.75162	152.941	3.58312e-11	3.46401e-09	Distal Intergenic	9	115381819	115381939	121	44751	ENSMUSG00000080409	Mir467h
Peak_37017	chr2	73521736	73522209	474	3.69667	3.60958	152.876	3.59739e-11	3.47296e-09	Intron (uc008kcw.2/215280, intron 1 of 7)	2	73429610	73529487	99878	7278	ENSMUSG00000075284	Wipf1
Peak_61546	chr8	36828648	36829104	457	4.37184	3.33585	152.759	3.62346e-11	3.49326e-09	Intron (uc012gcj.2/50768, intron 4 of 17)	8	36567739	36733054	165316	-95594	ENSMUSG00000031523	Dlc1
Peak_14520	chr12	58209883	58210220	338	4.36764	3.41511	152.728	3.63029e-11	3.49498e-09	Promoter (1-2kb)	12	58211804	58216036	4233	-1584	ENSMUSG00000035431	Sstr1
Peak_41590	chr3	56830365	56831075	711	-3.13914	4.0819	152.628	3.65266e-11	3.50834e-09	Distal Intergenic	3	57287064	57301919	14856	470844	ENSMUSG00000027800	Tm4sf1
Peak_36232	chr2	51087563	51088240	678	-2.77765	4.37803	152.621	3.65431e-11	3.50834e-09	Distal Intergenic	2	51130439	51149111	18673	60871	ENSMUSG00000017144	Rnd3
Peak_19069	chr13	109638271	109638978	708	3.67961	3.86712	152.539	3.67266e-11	3.52108e-09	Intron (uc007rvg.2/238871, intron 3 of 16)	13	109686156	109773441	87286	-47178	ENSMUSG00000021699	Pde4d
Peak_12944	chr11	120223563	120224381	819	3.09912	4.11573	152.499	3.6818e-11	3.5236e-09	Distal Intergenic	11	120232947	120292297	59351	-8566	ENSMUSG00000039741	Bahcc1
Peak_63171	chr8	94649605	94649960	356	4.50989	3.14075	152.46	3.69053e-11	3.5236e-09	Exon (uc009mwq.2/67610, exon 12 of 15)	8	94666600	94674457	7858	-16640	ENSMUSG00000031776	Arl2bp
Peak_13904	chr12	37987856	37988600	745	-2.992	4.30835	153.12	3.69057e-11	3.5236e-09	Intron (uc007nki.1/217480, intron 2 of 9)	12	38019180	38175077	155898	-30580	ENSMUSG00000036095	Dgkb
Peak_10761	chr11	44665099	44665738	640	2.66468	4.22084	152.341	3.71772e-11	3.54464e-09	Intron (uc007ink.2/13591, intron 6 of 15)	11	44618100	45008096	389997	46999	ENSMUSG00000057098	Ebf1
Peak_56059	chr6	112210293	112211082	790	2.05969	5.19088	152.283	3.73093e-11	3.55234e-09	Promoter (<=1kb)	6	112210708	112212518	1811	0	ENSMUSG00000100219	1700054K19Rik
Peak_17235	chr13	43182428	43183450	1023	2.33173	5.23729	159.205	3.74759e-11	3.5633e-09	Distal Intergenic	13	43163232	43171501	8270	-10927	ENSMUSG00000021368	Tbc1d7
Peak_21532	chr14	86489113	86489870	758	-2.88347	4.22793	152.11	3.77086e-11	3.58051e-09	Distal Intergenic	14	86245970	86283688	37719	243143	NA	4930529K09Rik
Peak_9757	chr11	8637999	8638645	647	3.1157	3.89059	152.03	3.78959e-11	3.59337e-09	Intron (uc007hzk.1/319939, intron 1 of 30)	11	8431652	8664535	232884	25890	ENSMUSG00000020422	Tns3
Peak_62673	chr8	79081892	79082448	557	2.14359	4.69385	151.941	3.8105e-11	3.60825e-09	Intron (uc009mih.2/622675, intron 4 of 14)	8	79118175	79193192	75018	-35727	ENSMUSG00000071064	Zfp827
Peak_58138	chr7	49480977	49481481	505	3.50312	3.54676	151.798	3.84433e-11	3.63299e-09	Intron (uc057ahh.1/78286, intron 11 of 38)	7	49450760	49464929	14170	30217	ENSMUSG00000052512	Nav2
Peak_63927	chr8	123083562	123084008	447	4.1535	3.21976	151.786	3.84713e-11	3.63299e-09	Intron (uc009nuc.1/234847, intron 9 of 16)	8	123065508	123097751	32244	18054	ENSMUSG00000000738	Spg7
Peak_27393	chr16	78573079	78573371	293	2.6798	4.17736	151.701	3.86731e-11	3.64707e-09	Intron (uc007zsr.3/67102, intron 2 of 4)	16	78540336	78576688	36353	3317	ENSMUSG00000022864	D16Ertd472e
Peak_39269	chr2	150872620	150873298	679	3.4875	3.44403	151.555	3.90234e-11	3.67378e-09	Intron (uc008muo.2/76192, intron 1 of 12)	2	150832515	150904731	72217	31433	ENSMUSG00000032046	Abhd12
Peak_22353	chr14	121634584	121635051	468	3.87903	3.81338	151.539	3.90625e-11	3.67378e-09	Exon (uc007vah.2/105445, exon 15 of 53)	14	121542152	121657636	115485	22585	ENSMUSG00000025558	Dock9
Peak_28125	chr17	13481273	13481981	709	2.49233	4.56148	151.511	3.913e-11	3.67514e-09	Distal Intergenic	17	13521456	13528434	6979	-39475	ENSMUSG00000079711	Smok4a
Peak_13999	chr12	40494755	40495186	432	3.86454	3.1421	151.474	3.92196e-11	3.67856e-09	Intron (uc007nlc.1/238130, intron 1 of 5)	12	40446053	40846488	400436	48702	ENSMUSG00000035954	Dock4
Peak_496	chr1	23206876	23207390	515	-3.70853	3.49318	151.292	3.96645e-11	3.71525e-09	Distal Intergenic	1	23272269	23272339	71	-64879	ENSMUSG00000065405	Mir30a
Peak_45299	chr4	7960002	7960667	666	-3.20857	3.42939	151.26	3.9743e-11	3.71758e-09	Distal Intergenic	4	8141493	8239041	97549	278374	ENSMUSG00000041261	Car8
Peak_2778	chr1	106155081	106155996	916	2.77364	5.01093	166.867	3.99313e-11	3.73016e-09	Intron (uc029qsp.1/626049, intron 2 of 2)	1	106152625	106171524	18900	15528	ENSMUSG00000101583	Gm20753
Peak_6860	chr10	44785349	44785974	626	-2.61916	4.12604	151.078	4.0194e-11	3.74964e-09	Distal Intergenic	10	44446717	44528501	81785	-256848	ENSMUSG00000038151	Prdm1
Peak_36433	chr2	57472632	57473179	548	3.32651	4.1925	150.956	4.04997e-11	3.76951e-09	Distal Intergenic	2	57244359	57310257	65899	228273	ENSMUSG00000026827	Gpd2
Peak_16825	chr13	29413310	29413638	329	3.70149	3.31353	150.949	4.0516e-11	3.76951e-09	Intron (uc057bcz.1/68916, intron 13 of 16)	13	29016255	29040336	24082	397055	ENSMUSG00000086363	A330102I10Rik
Peak_50217	chr5	36514012	36514408	397	4.56769	2.89322	150.822	4.08378e-11	3.79435e-09	Exon (uc008xer.2/100855, exon 6 of 13)	5	36490604	36530623	40020	16215	ENSMUSG00000029192	Tbc1d14
Peak_58738	chr7	74240396	74241445	1050	-2.33424	4.69654	150.747	4.10271e-11	3.80285e-09	Distal Intergenic	7	73939120	74013682	74563	-226714	ENSMUSG00000025789	St8sia2
Peak_50334	chr5	39212519	39212986	468	2.7597	4.05179	150.735	4.10575e-11	3.80285e-09	Distal Intergenic	5	38706457	38876693	170237	-335826	ENSMUSG00000039315	Clnk
Peak_16275	chr13	13482088	13482667	580	2.94462	3.99245	150.702	4.11433e-11	3.80285e-09	Exon (uc007pmf.2/18073, exon 8 of 14)	13	13437602	13512275	74674	44486	ENSMUSG00000005397	Nid1
Peak_6567	chr10	36407964	36408328	365	-3.90179	3.14863	150.699	4.1149e-11	3.80285e-09	Distal Intergenic	10	36506807	36834394	327588	-98479	ENSMUSG00000044499	Hs3st5
Peak_61309	chr8	30648159	30648912	754	-2.85225	4.31199	150.651	4.12725e-11	3.80831e-09	Distal Intergenic	8	30568395	30575573	7179	79764	ENSMUSG00000097044	4933433F19Rik
Peak_22134	chr14	115745859	115746708	850	-3.16908	4.41588	157.519	4.13181e-11	3.80831e-09	Intron (uc007uyi.2/103978, intron 6 of 7)	14	115396551	115409552	13002	-336307	ENSMUSG00000093551	4930505G20Rik
Peak_16479	chr13	20133521	20134174	654	2.93445	4.0425	150.53	4.15833e-11	3.82765e-09	Intron (uc007ppm.2/140580, intron 1 of 6)	13	20111512	20342888	231377	22009	ENSMUSG00000041112	Elmo1
Peak_26959	chr16	62537647	62538461	815	-2.26282	4.4078	150.415	4.18839e-11	3.84575e-09	Distal Intergenic	16	62734852	62786716	51865	248255	ENSMUSG00000050312	Nsun3
Peak_7463	chr10	67954310	67954959	650	4.09946	4.09624	157.271	4.19187e-11	3.84575e-09	Distal Intergenic	10	67979598	68043261	63664	-24639	ENSMUSG00000037846	Rtkn2
Peak_11273	chr11	62966422	62967647	1226	1.98115	5.4532	152.926	4.19466e-11	3.84575e-09	Intron (uc007jkj.1/66338, intron 1 of 1)	11	62951193	62993095	41903	15229	ENSMUSG00000042200	Cdrt4
Peak_56866	chr6	137357324	137357826	503	3.70975	3.40056	150.342	4.20741e-11	3.85009e-09	Intron (uc009emu.2/19277, intron 1 of 2)	6	137410721	137464633	53913	-52895	ENSMUSG00000030223	Ptpro
Peak_60940	chr8	14906843	14907534	692	2.86603	4.31185	150.315	4.21441e-11	3.85009e-09	Distal Intergenic	8	14911663	14961285	49623	-4129	ENSMUSG00000071176	Arhgef10
Peak_28075	chr17	10483888	10484811	924	2.8806	4.20114	150.309	4.21608e-11	3.85009e-09	Intron (uc033har.1/319750, intron 1 of 1)	17	10456216	10493057	36842	27672	ENSMUSG00000089633	A230009B12Rik
Peak_16068	chr13	3807410	3807882	473	3.00245	3.586	150.069	4.27955e-11	3.90291e-09	Distal Intergenic	13	3802893	3804318	1426	-3092	ENSMUSG00000063130	Calml3
Peak_40425	chr3	14888544	14888935	392	-3.80873	3.51309	149.923	4.31885e-11	3.93357e-09	Promoter (2-3kb)	3	14886426	14900770	14345	2118	ENSMUSG00000027562	Car2
Peak_40495	chr3	18941320	18942656	1337	2.16695	4.93348	149.839	4.34151e-11	3.94901e-09	Distal Intergenic	3	19132144	19163065	30922	220409	ENSMUSG00000027599	Armc1
Peak_16262	chr13	12543233	12543741	509	-3.26805	4.28226	155.793	4.36843e-11	3.96828e-09	Intron (uc007plq.1/uc007plq.1, intron 2 of 2)	13	12565883	12606112	40230	-22142	ENSMUSG00000057069	Ero1lb
Peak_16170	chr13	8484440	8485223	784	-2.70053	4.27236	149.673	4.3866e-11	3.97956e-09	Intron (uc007pkf.2/94191, intron 1 of 9)	13	8202866	8768762	565897	281574	ENSMUSG00000052551	Adarb2
Peak_28166	chr17	15180258	15181025	768	3.44376	4.42193	156.462	4.39452e-11	3.98153e-09	Distal Intergenic	17	15231585	15240783	9199	59758	ENSMUSG00000097624	Gm5091
Peak_24299	chr15	73222692	73223325	634	2.02419	5.16853	149.613	4.40307e-11	3.98406e-09	Intron (uc033gub.1/14083, intron 26 of 32)	15	73254815	73254882	68	31557	ENSMUSG00000065612	Mir151
Peak_45369	chr4	9323049	9323862	814	2.67027	4.67079	150.725	4.412e-11	3.98424e-09	Intron (uc008ryd.2/74438, intron 2 of 2)	4	9269317	9451691	182375	53732	ENSMUSG00000041216	Clvs1
Peak_15684	chr12	104964955	104965716	762	-3.0818	4.10542	149.558	4.41847e-11	3.98424e-09	Intron (uc007oxr.2/212073, intron 5 of 18)	12	104929933	104998677	68745	32961	ENSMUSG00000054150	Syne3
Peak_13349	chr12	15639243	15640404	1162	2.75476	4.86164	157.64	4.42054e-11	3.98424e-09	Distal Intergenic	12	15800994	15801101	108	160697	ENSMUSG00000098480	Mir6387
Peak_65329	chr9	50873802	50874442	641	4.01532	3.71272	149.334	4.48067e-11	4.03319e-09	Intron (uc009pkv.2/73699, intron 11 of 14)	9	50856924	50894229	37306	16878	ENSMUSG00000032058	Ppp2r1b
Peak_45104	chr3	157119895	157120328	434	3.94154	3.61093	149.24	4.50725e-11	4.05184e-09	Intron (uc008rvb.1/320840, intron 4 of 6)	3	157534397	157548339	13943	-414069	ENSMUSG00000028180	Zranb2
Peak_26149	chr16	31255719	31256090	372	4.18532	3.27878	149.141	4.53529e-11	4.06908e-09	Intron (uc007yxd.1/66849, intron 5 of 5)	16	31251541	31275277	23737	19187	ENSMUSG00000047714	Ppp1r2
Peak_20237	chr14	36889983	36890543	561	3.31082	3.72415	149.131	4.53818e-11	4.06908e-09	Exon (uc007tbo.1/72972, exon 10 of 11)	14	36874936	36935568	60633	45025	ENSMUSG00000058690	Ccser2
Peak_64982	chr9	37454258	37454573	316	-3.64976	3.04172	149.105	4.54562e-11	4.07048e-09	Distal Intergenic	9	37416045	37433175	17131	-21083	ENSMUSG00000032128	Robo3
Peak_31246	chr18	33552565	33553295	731	-2.11233	5.0029	149.033	4.56618e-11	4.07574e-09	Distal Intergenic	18	33464163	33474710	10548	88402	NA	Gm10549
Peak_57332	chr7	4821676	4822348	673	3.08036	3.84645	149.029	4.56723e-11	4.07574e-09	Distal Intergenic	7	4808014	4812340	4327	-9336	ENSMUSG00000060860	Ube2s
Peak_10303	chr11	29744505	29745313	809	2.75428	4.70637	152.629	4.56916e-11	4.07574e-09	3' UTR	11	29743051	29764233	21183	18920	ENSMUSG00000044072	Eml6
Peak_51881	chr5	102072933	102073180	248	-3.93833	2.93938	148.99	4.57837e-11	4.0787e-09	Distal Intergenic	5	101929307	102069921	140615	-3012	ENSMUSG00000043940	Wdfy3
Peak_41349	chr3	50844801	50845636	836	-2.76158	4.59874	153.514	4.58731e-11	4.08141e-09	Distal Intergenic	3	51224447	51251654	27208	-378811	ENSMUSG00000023087	Noct
Peak_75	chr1	6800576	6801215	640	-2.9873	3.75882	148.86	4.61606e-11	4.10172e-09	Intron (uc007afw.1/240690, intron 7 of 23)	1	6730051	6860940	130890	70525	ENSMUSG00000033740	St18
Peak_59105	chr7	87186281	87187167	887	2.1588	4.59788	148.809	4.6307e-11	4.10843e-09	Distal Intergenic	7	87246649	87287981	41333	-59482	ENSMUSG00000030562	Nox4
Peak_63275	chr8	97030022	97030358	337	3.82614	3.24814	148.793	4.63549e-11	4.10843e-09	Distal Intergenic	8	95864137	95888365	24229	-1141657	ENSMUSG00000031672	Got2
Peak_40514	chr3	19566833	19567487	655	-3.08911	4.44268	155.451	4.66286e-11	4.12741e-09	Intron (uc008orv.2/66326, intron 2 of 4)	3	19531247	19610862	79616	35586	ENSMUSG00000027606	Dnajc5b
Peak_26235	chr16	34251937	34252440	504	3.95175	3.34429	148.616	4.6872e-11	4.14365e-09	Exon (uc012aew.1/545156, exon 13 of 60)	16	34152025	34262965	110941	10525	ENSMUSG00000061751	Kalrn
Peak_35006	chr2	10755337	10755932	596	3.06843	4.55727	155.319	4.69937e-11	4.14911e-09	Distal Intergenic	2	10517604	10517730	127	237733	ENSMUSG00000080657	Mir669i
Peak_5761	chr10	11098568	11098981	414	-3.78213	2.87334	148.31	4.77842e-11	4.21353e-09	Distal Intergenic	10	10686059	11082331	396273	-16237	ENSMUSG00000019828	Grm1
Peak_51118	chr5	69634639	69635258	620	-3.75948	4.18504	158.176	4.80771e-11	4.22839e-09	Distal Intergenic	5	69575002	69592285	17284	-42354	ENSMUSG00000029209	Gnpda2
Peak_25505	chr16	10307279	10307856	578	-3.52416	3.45197	148.209	4.80895e-11	4.22839e-09	Intron (uc007ydj.1/13731, intron 1 of 4)	16	10281749	10313968	32220	6112	ENSMUSG00000022505	Emp2
Peak_33577	chr19	17540642	17541327	686	2.83877	4.19935	148.184	4.81664e-11	4.22839e-09	Intron (uc008gxp.3/18552, intron 20 of 37)	19	17394043	17401349	7307	146599	ENSMUSG00000024712	Rfk
Peak_63625	chr8	111912730	111913508	779	1.88547	5.48477	148.78	4.81971e-11	4.22839e-09	Promoter (2-3kb)	8	111889135	111910199	21065	-2531	ENSMUSG00000031952	Chst5
Peak_38788	chr2	136140778	136141402	625	2.90375	3.76966	148.119	4.83625e-11	4.23753e-09	Intron (uc008moh.1/241656, intron 3 of 9)	2	136057927	136069917	11991	82851	ENSMUSG00000027270	Lamp5
Peak_52431	chr5	123985353	123985855	503	3.85658	3.56073	147.98	4.87896e-11	4.26955e-09	Intron (uc008zos.2/29816, intron 1 of 31)	5	123996852	123996930	79	-10997	ENSMUSG00000098454	Mir7032
Peak_15397	chr12	94605477	94605985	509	2.30641	4.56131	147.953	4.8874e-11	4.27154e-09	Distal Intergenic	12	93927338	93927464	127	678139	ENSMUSG00000098498	Mir8099-1
Peak_34696	chr19	56955941	56956469	529	3.26026	3.64944	147.9	4.90369e-11	4.28037e-09	Intron (uc008hzm.2/226250, intron 2 of 19)	19	56912354	57008575	96222	52106	ENSMUSG00000025083	Afap1l2
Peak_63880	chr8	121668449	121669047	599	-2.55333	4.00377	147.855	4.91778e-11	4.28219e-09	Distal Intergenic	8	121598703	121651933	53231	-16516	ENSMUSG00000061410	Zcchc14
Peak_41909	chr3	66169883	66170390	508	3.11809	4.07351	147.853	4.91815e-11	4.28219e-09	Intron (uc008pkz.3/72789, intron 7 of 13)	3	66053558	66136438	82881	-33445	ENSMUSG00000027831	Veph1
Peak_36993	chr2	72426693	72427385	693	-2.71266	4.44729	147.815	4.93009e-11	4.28719e-09	Intron (uc008kbv.2/65964, intron 16 of 19)	2	72476219	72486890	10672	-48834	ENSMUSG00000055612	Cdca7
Peak_142	chr1	10899209	10899785	577	3.04187	4.06034	147.737	4.95455e-11	4.30306e-09	Distal Intergenic	1	10993465	11303682	310218	-93680	ENSMUSG00000048960	Prex2
Peak_37735	chr2	103647852	103648161	310	4.88619	3.16752	147.621	4.99102e-11	4.32409e-09	Intron (uc008lix.1/99382, intron 1 of 16)	2	103566310	103718423	152114	81542	ENSMUSG00000032724	Abtb2
Peak_43147	chr3	104993714	104994318	605	2.70457	4.62264	148.223	4.99125e-11	4.32409e-09	Distal Intergenic	3	104944805	104961709	16905	-32005	ENSMUSG00000027840	Wnt2b
Peak_64470	chr9	20794061	20794743	683	2.5866	4.6351	147.571	5.00685e-11	4.33218e-09	Intron (uc009ojf.2/53867, intron 27 of 66)	9	20770057	20815067	45011	20324	ENSMUSG00000004098	Col5a3
Peak_21824	chr14	101612991	101613396	406	-3.63756	3.49286	147.513	5.02521e-11	4.34139e-09	Distal Intergenic	14	101462875	101609191	146317	-3800	ENSMUSG00000033083	Tbc1d4
Peak_6926	chr10	47262902	47263452	551	-3.94563	3.45619	147.498	5.03004e-11	4.34139e-09	Distal Intergenic	10	46244748	46244770	23	1018154	ENSMUSG00000095118	Snord14d
Peak_49231	chr4	153453492	153453992	501	3.98354	3.55042	147.466	5.04001e-11	4.34458e-09	Intron (uc008was.1/230959, intron 1 of 5)	4	153373221	153482830	109610	28838	ENSMUSG00000039546	Ajap1
Peak_18449	chr13	92702998	92704076	1079	2.64091	5.30469	167.257	5.08651e-11	4.3792e-09	Intron (uc007rkt.1/218442, intron 9 of 11)	13	92751586	92794818	43233	90742	ENSMUSG00000021702	Thbs4
Peak_43288	chr3	108101449	108102077	629	-2.92387	3.84233	147.256	5.10767e-11	4.38704e-09	Distal Intergenic	3	108093194	108101430	8237	8255	ENSMUSG00000009108	Gnat2
Peak_32785	chr18	78337252	78337999	748	-1.99484	4.67944	147.254	5.10829e-11	4.38704e-09	Intron (uc008fsg.2/27411, intron 2 of 21)	18	78183241	78206440	23200	-130812	ENSMUSG00000024552	Slc14a2
Peak_24658	chr15	82135393	82135870	478	4.70286	3.29059	147.185	5.13062e-11	4.40076e-09	Intron (uc007wye.1/76457, intron 6 of 6)	15	82127922	82142202	14281	7471	ENSMUSG00000068114	Ccdc134
Peak_63957	chr8	123867032	123867552	521	3.70296	3.56189	147.165	5.13725e-11	4.401e-09	Distal Intergenic	8	123840844	123860209	19366	-6823	ENSMUSG00000031971	Ccsap
Peak_49960	chr5	27286821	27287320	500	-3.51333	3.30393	147.104	5.15728e-11	4.4127e-09	Intron (uc008wtj.1/13483, intron 1 of 3)	5	27261935	27727500	465566	24886	ENSMUSG00000061576	Dpp6
Peak_39270	chr2	150902607	150902832	226	3.77853	3.44175	146.958	5.20527e-11	4.44826e-09	Promoter (1-2kb)	2	150832515	150904731	72217	1899	ENSMUSG00000032046	Abhd12
Peak_38186	chr2	117479299	117480169	871	2.87877	4.40764	146.777	5.26545e-11	4.49413e-09	Distal Intergenic	2	117279993	117342877	62885	-136422	ENSMUSG00000027347	Rasgrp1
Peak_3691	chr1	138982325	138983001	677	2.77848	4.05228	146.611	5.32149e-11	4.53637e-09	Intron (uc007cvy.2/329260, intron 2 of 9)	1	138977657	138979246	1590	4668	ENSMUSG00000104900	4930596I21Rik
Peak_2412	chr1	88839848	88840701	854	2.60217	4.56696	146.563	5.33779e-11	4.53688e-09	Distal Intergenic	1	88754890	88755733	844	84958	ENSMUSG00000097398	Platr5
Peak_51711	chr5	96659624	96660178	555	2.87372	3.79463	146.553	5.34097e-11	4.53688e-09	Intron (uc008yfk.1/231470, intron 29 of 73)	5	96793385	96825894	32510	-133207	ENSMUSG00000029484	Anxa3
Peak_30514	chr18	8523636	8524395	760	-2.85729	4.08196	146.551	5.34175e-11	4.53688e-09	Distal Intergenic	18	7869716	7916297	46582	653920	ENSMUSG00000024283	Wac
Peak_55768	chr6	100700689	100701030	342	4.21958	3.38125	146.45	5.37619e-11	4.56054e-09	Distal Intergenic	6	100704734	100805081	100348	-3704	ENSMUSG00000030074	Gxylt2
Peak_16347	chr13	16196563	16197111	549	-3.43175	3.95721	147.281	5.38584e-11	4.56313e-09	Distal Intergenic	13	16014451	16027211	12761	182112	ENSMUSG00000041324	Inhba
Peak_62656	chr8	78599627	78600094	468	3.39619	3.62664	146.19	5.46606e-11	4.62544e-09	Intron (uc012ggh.2/76775, intron 5 of 10)	8	78509328	78734012	224685	90299	ENSMUSG00000031684	Slc10a7
Peak_64685	chr9	27289658	27290457	800	2.91433	4.80113	155.851	5.49661e-11	4.64561e-09	Distal Intergenic	9	27299228	27330135	30908	-8771	ENSMUSG00000034275	Igsf9b
Peak_10126	chr11	22587819	22588306	488	2.42928	4.45215	145.83	5.59328e-11	4.72154e-09	Distal Intergenic	11	22512283	22519231	6949	75536	ENSMUSG00000049904	Tmem17
Peak_27314	chr16	77058550	77059154	605	2.35309	4.60318	145.79	5.60768e-11	4.72794e-09	Intron (uc007zsb.1/30940, intron 6 of 23)	16	77014069	77116780	102712	44481	ENSMUSG00000022867	Usp25
Peak_25235	chr15	101189934	101190184	251	2.5498	4.21453	145.77	5.61478e-11	4.72816e-09	Intron (uc007xsr.1/11479, intron 1 of 8)	15	101193869	101193931	63	-3685	ENSMUSG00000106563	Mir6962
Peak_21504	chr14	84476275	84476689	415	3.50894	3.63985	145.742	5.62469e-11	4.73075e-09	Promoter (<=1kb)	14	84458838	84476424	17587	0	NA	9630013A20Rik
Peak_62056	chr8	57989491	57990240	750	2.12167	4.67274	145.696	5.64133e-11	4.7386e-09	Intron (uc012gea.2/270049, intron 4 of 11)	8	57774052	57796590	22539	-192901	ENSMUSG00000096914	Galntl6
Peak_30571	chr18	10655457	10656022	566	2.82092	3.91456	145.679	5.64772e-11	4.7386e-09	Intron (uc008eba.1/106861, intron 5 of 8)	18	10617796	10628230	10435	37661	ENSMUSG00000002477	Snrpd1
Peak_38970	chr2	141913489	141914229	741	-2.59664	3.93526	145.657	5.65539e-11	4.7393e-09	Intron (uc008mpv.1/72899, intron 8 of 18)	2	141555676	142390050	834375	357813	ENSMUSG00000068205	Macrod2
Peak_37770	chr2	104404255	104404799	545	4.31522	3.27419	145.61	5.67246e-11	4.74279e-09	Intron (uc008ljr.1/241589, intron 1 of 20)	2	104143075	104410334	267260	5535	ENSMUSG00000068373	D430041D05Rik
Peak_13978	chr12	40112962	40113456	495	3.29608	3.73416	145.608	5.67326e-11	4.74279e-09	Intron (uc007nkw.2/20259, intron 3 of 15)	12	40059771	40134228	74458	20772	ENSMUSG00000002565	Scin
Peak_32351	chr18	64888457	64889381	925	-1.7801	5.25382	145.537	5.69916e-11	4.75299e-09	Promoter (<=1kb)	18	64889029	65217826	328798	0	ENSMUSG00000024589	Nedd4l
Peak_10291	chr11	29448783	29449200	418	-4.02082	3.08911	145.514	5.70752e-11	4.75299e-09	Intron (uc007igw.2/108686, intron 8 of 31)	11	29456458	29462261	5804	-7258	ENSMUSG00000032740	Ccdc88a
Peak_45147	chr3	158824264	158825203	940	-2.47829	4.34051	145.49	5.71626e-11	4.75299e-09	Distal Intergenic	3	159076364	159308080	231717	-251161	ENSMUSG00000106053	Gm20752
Peak_25952	chr16	25323427	25324073	647	-3.41289	3.5658	145.474	5.72211e-11	4.75299e-09	Intron (uc007yum.1/71338, intron 2 of 5)	16	25286817	25422344	135528	36610	ENSMUSG00000048399	Tprg
Peak_56527	chr6	125467166	125467865	700	1.88513	5.3958	145.465	5.72541e-11	4.75299e-09	Intron (uc009dun.1/12527, intron 2 of 7)	6	125460266	125494755	34490	26890	ENSMUSG00000030342	Cd9
Peak_60786	chr8	10722454	10723027	574	-3.3756	3.21804	145.462	5.72665e-11	4.75299e-09	Distal Intergenic	8	10870422	10882454	12033	159427	ENSMUSG00000109473	B930025P03Rik
Peak_4161	chr1	157940229	157940888	660	-2.89228	4.54815	151.927	5.74933e-11	4.76181e-09	Distal Intergenic	1	157535852	157562189	26338	404377	ENSMUSG00000026589	Sec16b
Peak_3963	chr1	152792542	152793362	821	3.01947	4.06865	145.384	5.7552e-11	4.76181e-09	Distal Intergenic	1	152800153	152836990	36838	-6791	ENSMUSG00000026480	Ncf2
Peak_2137	chr1	80854107	80854859	753	2.02934	5.25903	146.473	5.75793e-11	4.76181e-09	Distal Intergenic	1	80645706	80758553	112848	-95554	ENSMUSG00000038608	Dock10
Peak_4004	chr1	153664750	153665728	979	-2.38754	5.05378	153.616	5.76735e-11	4.76391e-09	Intron (uc007dad.1/67792, intron 1 of 6)	1	153653037	153697665	44629	11713	ENSMUSG00000042671	Rgs8
Peak_13332	chr12	14574077	14574697	621	3.28002	4.01993	145.207	5.82091e-11	4.79195e-09	Distal Intergenic	12	14261534	14285684	24151	312543	ENSMUSG00000113336	Gm16497
Peak_23747	chr15	55457308	55457673	366	3.904	3.2515	145.207	5.8211e-11	4.79195e-09	Intron (uc007vsc.2/12818, intron 34 of 47)	15	55448732	55519687	70956	8576	ENSMUSG00000022371	Col14a1
Peak_32560	chr18	70371780	70372432	653	-3.01662	3.53314	145.204	5.82206e-11	4.79195e-09	Distal Intergenic	18	70453140	70464150	11011	91718	ENSMUSG00000044906	4930503L19Rik
Peak_5523	chr10	3978394	3978782	389	3.39575	3.67201	145.11	5.85745e-11	4.81536e-09	Exon (uc007ehj.2/270685, exon 2 of 28)	10	3973075	4167081	194007	5319	ENSMUSG00000040675	Mthfd1l
Peak_3635	chr1	137767574	137768306	733	2.58625	4.27049	145.077	5.86984e-11	4.81602e-09	Distal Intergenic	1	137966455	137966718	264	-198149	ENSMUSG00000065565	Mir181a-1
Peak_60740	chr8	9368208	9368833	626	3.32326	3.73308	145.057	5.8774e-11	4.81602e-09	Intron (uc009kuj.1/270028, intron 1 of 2)	8	9206010	9323369	117360	-44839	ENSMUSG00000079157	Fam155a
Peak_10917	chr11	49934281	49934698	418	3.27276	3.36158	145.052	5.87913e-11	4.81602e-09	Intron (uc007irj.1/74563, intron 1 of 13)	11	49901835	49980223	78389	32446	ENSMUSG00000020374	Rasgef1c
Peak_57043	chr6	141499247	141499842	596	2.76485	3.90437	145.013	5.89395e-11	4.81991e-09	3' UTR	6	141524386	141570177	45792	-24544	ENSMUSG00000030235	Slco1c1
Peak_46812	chr4	63528914	63529344	431	-3.37314	3.15848	144.987	5.90401e-11	4.81991e-09	Distal Intergenic	4	63544765	63550701	5937	-15421	ENSMUSG00000039105	Atp6v1g1
Peak_52033	chr5	107873800	107874331	532	3.5849	3.39946	144.985	5.90478e-11	4.81991e-09	Promoter (<=1kb)	5	107744795	107875107	130313	776	ENSMUSG00000011831	Evi5
Peak_45880	chr4	30269375	30269728	354	3.5224	3.62265	144.826	5.9654e-11	4.86366e-09	Distal Intergenic	4	30664596	30855744	191149	-394868	NA	4930556G01Rik
Peak_18986	chr13	107766766	107767601	836	-2.43962	4.89622	151.227	5.99648e-11	4.88325e-09	Intron (uc007rup.2/67263, intron 5 of 14)	13	107724617	107734027	9411	-32739	NA	Zswim6
Peak_9131	chr10	117586846	117587344	499	2.93887	3.90406	144.588	6.05744e-11	4.92421e-09	Distal Intergenic	10	117629500	117687352	57853	-42156	ENSMUSG00000020183	Cpm
Peak_5902	chr10	14703319	14703598	280	-3.22528	3.60357	144.579	6.06101e-11	4.92421e-09	Promoter (1-2kb)	10	14655333	14705489	50157	1891	ENSMUSG00000019868	Vta1
Peak_30584	chr18	10976381	10977282	902	2.5618	4.81276	148.265	6.07499e-11	4.92979e-09	Distal Intergenic	18	11049087	11051487	2401	74205	ENSMUSG00000097222	1010001N08Rik
Peak_13320	chr12	13983852	13984651	800	-2.99089	4.13699	144.414	6.12593e-11	4.96409e-09	Distal Intergenic	12	14147598	14152038	4441	167387	ENSMUSG00000020607	Fam84a
Peak_55762	chr6	100505828	100506320	493	3.77794	3.32484	144.399	6.1316e-11	4.96409e-09	Distal Intergenic	6	100527400	100533426	6027	-21080	ENSMUSG00000101553	1700049E22Rik
Peak_44681	chr3	145622881	145623453	573	3.19388	4.43917	150.764	6.16659e-11	4.98658e-09	Distal Intergenic	3	145646971	145649985	3015	26532	ENSMUSG00000028195	Cyr61
Peak_3847	chr1	149545954	149546527	574	-3.23398	3.70637	144.25	6.19093e-11	4.99142e-09	Distal Intergenic	1	149829619	149922439	92821	375912	ENSMUSG00000056220	Pla2g4a
Peak_9192	chr10	119395106	119395446	341	-4.38545	3.05511	144.235	6.19696e-11	4.99142e-09	Distal Intergenic	10	119413444	119426864	13421	-17998	ENSMUSG00000100558	1700025F24Rik
Peak_61267	chr8	28252363	28252874	512	-3.08036	3.74104	144.22	6.203e-11	4.99142e-09	Distal Intergenic	8	28083194	28084853	1660	-167510	ENSMUSG00000110372	Gm8096
Peak_55445	chr6	90699821	90700334	514	3.66397	3.6668	144.217	6.20414e-11	4.99142e-09	Intron (uc009cxq.2/232227, intron 1 of 13)	6	90659598	90716529	56932	16195	ENSMUSG00000034312	Iqsec1
Peak_67630	chrX	14505147	14505766	620	2.31114	4.58535	144.206	6.20862e-11	4.99142e-09	Distal Intergenic	20	14211148	14211657	510	293999	ENSMUSG00000078346	H2al1n
Peak_14658	chr12	68463056	68463459	404	2.60176	4.18638	144.183	6.21784e-11	4.99303e-09	Distal Intergenic	12	69157722	69159186	1465	695727	ENSMUSG00000034892	Rps29
Peak_13894	chr12	37652840	37653640	801	-3.23837	3.76406	144.101	6.25086e-11	5.01245e-09	Distal Intergenic	12	37880174	38136840	256667	-226534	ENSMUSG00000036095	Dgkb
Peak_46878	chr4	65839338	65840061	724	2.08775	5.13236	144.397	6.27157e-11	5.01245e-09	Intron (uc008thn.1/56079, intron 10 of 22)	4	65604986	65616240	11255	234352	ENSMUSG00000051675	Trim32
Peak_52966	chr5	146248628	146249128	501	4.13181	3.58189	144.034	6.278e-11	5.01245e-09	Intron (uc012egz.1/264064, intron 1 of 12)	5	146231675	146302874	71200	16953	ENSMUSG00000029635	Cdk8
Peak_14791	chr12	72437619	72438376	758	-2.86602	3.5192	144.031	6.27929e-11	5.01245e-09	Distal Intergenic	12	72441866	72467526	25661	-3490	ENSMUSG00000021090	Lrrc9
Peak_32128	chr18	59226797	59227253	457	3.53525	3.64376	144.021	6.28311e-11	5.01245e-09	Intron (uc008ezw.1/78923, intron 2 of 2)	18	59175340	59411336	235997	51457	ENSMUSG00000058152	Chsy3
Peak_29749	chr17	73253646	73254030	385	3.76944	3.20225	144.016	6.28548e-11	5.01245e-09	Intron (uc008dni.1/uc008dni.1, intron 1 of 3)	17	73315264	73383050	67787	129020	ENSMUSG00000043705	Capn13
Peak_68789	chrX	140660489	140661030	542	3.7121	4.19456	150.425	6.29441e-11	5.0138e-09	Distal Intergenic	20	140664956	140767715	102760	-3926	ENSMUSG00000000266	Mid2
Peak_44324	chr3	136922180	136922513	334	3.68464	3.21435	143.95	6.3123e-11	5.02227e-09	Intron (uc008rmg.2/19055, intron 11 of 13)	3	136903052	136937727	34676	19128	ENSMUSG00000028161	Ppp3ca
Peak_67787	chrX	41372136	41372573	438	3.44573	3.20251	143.829	6.36189e-11	5.05592e-09	Distal Intergenic	20	41400854	41613554	212701	-28281	ENSMUSG00000001986	Gria3
Peak_31829	chr18	49534632	49535049	418	3.61914	3.87541	143.748	6.39547e-11	5.07102e-09	Distal Intergenic	18	49523289	49524441	1153	11343	ENSMUSG00000100297	1700044K03Rik
Peak_31543	chr18	40352025	40352600	576	2.81833	3.98866	143.746	6.39603e-11	5.07102e-09	Intron (uc012bch.1/383348, intron 1 of 1)	18	40258361	40531184	272824	93664	ENSMUSG00000051401	Kctd16
Peak_10633	chr11	40362571	40363185	615	-3.25394	3.92452	143.73	6.40288e-11	5.07102e-09	Distal Intergenic	11	40679314	40692682	13369	329497	ENSMUSG00000042032	Mat2b
Peak_56310	chr6	118841902	118842291	390	-4.0154	3.46927	143.572	6.46879e-11	5.11737e-09	Intron (uc009dlt.3/12288, intron 3 of 46)	6	118880158	118885543	5386	-37867	NA	4931430N09Rik
Peak_45508	chr4	13240689	13241403	715	2.60565	3.89215	143.552	6.47713e-11	5.11811e-09	Distal Intergenic	4	12906837	12981485	74649	333852	ENSMUSG00000055963	Triqk
Peak_58918	chr7	79577237	79577930	694	-2.55214	4.24737	143.501	6.49836e-11	5.12904e-09	Distal Intergenic	7	79593363	79617657	24295	39727	ENSMUSG00000030549	Rhcg
Peak_25565	chr16	11625725	11626616	892	2.54907	4.55566	143.475	6.50934e-11	5.13185e-09	Intron (uc029swd.1/74478, intron 15 of 20)	16	11779702	11781501	1800	-153086	NA	4833415N18Rik
Peak_27626	chr16	89827482	89828231	750	2.80116	4.50175	144.752	6.5481e-11	5.15654e-09	Intron (uc007zvt.2/21844, intron 2 of 14)	16	89787111	89818352	31242	-9130	ENSMUSG00000002489	Tiam1
Peak_42250	chr3	79818172	79818665	494	2.72393	3.97686	143.329	6.57123e-11	5.16554e-09	Intron (uc008pnw.1/70652, intron 10 of 11)	3	79813153	79841729	28577	23064	ENSMUSG00000027956	Tmem144
Peak_4563	chr1	168169289	168170061	773	-2.60586	4.274	143.322	6.57446e-11	5.16554e-09	Intron (uc007dld.2/18514, intron 7 of 7)	1	168119364	168432169	312806	262108	ENSMUSG00000052534	Pbx1
Peak_42651	chr3	89858829	89859385	557	2.85131	4.05217	143.275	6.59449e-11	5.1754e-09	3' UTR	3	89831370	89858846	27477	27459	ENSMUSG00000046280	She
Peak_10625	chr11	39783464	39783843	380	4.47129	3.30273	143.257	6.60208e-11	5.17549e-09	Distal Intergenic	11	39307703	39390225	82523	-393239	NA	4930553C11Rik
Peak_47094	chr4	76260330	76261033	704	-3.41985	4.07465	147.054	6.65649e-11	5.20746e-09	Intron (uc008tjm.2/19266, intron 11 of 39)	4	76136811	76344226	207416	83193	ENSMUSG00000028399	Ptprd
Peak_44505	chr3	141814163	141814945	783	-3.56735	4.1388	149.863	6.65791e-11	5.20746e-09	Intron (uc008rod.1/22253, intron 13 of 17)	3	141837136	141931588	94453	116643	ENSMUSG00000052430	Bmpr1b
Peak_36120	chr2	48090601	48091074	474	3.3295	3.68054	143.096	6.67154e-11	5.21223e-09	Distal Intergenic	2	48814109	48903264	89156	-723035	ENSMUSG00000052155	Acvr2a
Peak_67962	chrX	57286548	57286890	343	3.74082	3.10637	143.003	6.71223e-11	5.23684e-09	Intron (uc009thd.2/73341, intron 6 of 21)	20	57231485	57281594	50110	-4954	ENSMUSG00000031133	Arhgef6
Peak_245	chr1	14180185	14180682	498	2.91874	3.99842	142.989	6.71816e-11	5.23684e-09	Intron (uc007aiw.1/14048, intron 15 of 16)	1	14168958	14304570	135613	123888	ENSMUSG00000025932	Eya1
Peak_8437	chr10	95619501	95620115	615	-2.61431	4.42216	142.766	6.81668e-11	5.30766e-09	Distal Intergenic	10	95547007	95564167	17161	-55334	ENSMUSG00000020029	Nudt4
Peak_12608	chr11	110772346	110772716	371	5.16871	3.05987	142.738	6.82911e-11	5.31136e-09	Distal Intergenic	11	110968033	111027967	59935	-195317	ENSMUSG00000051497	Kcnj16
Peak_16099	chr13	5398397	5399145	749	2.78621	4.25722	142.691	6.85014e-11	5.31723e-09	Distal Intergenic	13	5855509	5858092	2584	458947	ENSMUSG00000100625	1700016G22Rik
Peak_3638	chr1	137838170	137838814	645	-2.83048	4.21196	142.668	6.86024e-11	5.31723e-09	Distal Intergenic	1	137966455	137966718	264	-127641	ENSMUSG00000065565	Mir181a-1
Peak_66152	chr9	80076624	80077158	535	2.94328	3.58248	142.658	6.86471e-11	5.31723e-09	Intron (uc009qva.1/215351, intron 1 of 4)	9	80066903	80144781	77879	9721	ENSMUSG00000034252	Senp6
Peak_51298	chr5	75755915	75756601	687	-3.34931	3.62424	142.651	6.86782e-11	5.31723e-09	Distal Intergenic	5	75649094	75656721	7628	106821	ENSMUSG00000005672	Kit
Peak_63898	chr8	122224013	122225168	1156	2.92316	4.89188	157.17	6.87507e-11	5.31723e-09	Distal Intergenic	8	122282141	122337247	55107	-56973	ENSMUSG00000049577	Zfpm1
Peak_43081	chr3	102762341	102762801	461	2.94447	3.6958	142.521	6.92624e-11	5.35083e-09	Intron (uc008qrw.2/70747, intron 6 of 7)	3	102777398	102782714	5317	19913	ENSMUSG00000027857	Tshb
Peak_2630	chr1	97843247	97844056	810	-3.31178	4.29156	149.478	6.96229e-11	5.37269e-09	Intron (uc007cfo.1/18484, intron 17 of 25)	1	97825837	97894464	68628	50408	ENSMUSG00000026335	Pam
Peak_13081	chr12	5253197	5253998	802	2.30792	4.74485	142.394	6.98415e-11	5.38355e-09	Intron (uc011yjz.2/208439, intron 1 of 11)	12	5077466	5291444	213979	37446	ENSMUSG00000020627	Klhl29
Peak_45370	chr4	9335292	9335916	625	2.90491	3.89438	142.321	7.01726e-11	5.40305e-09	Intron (uc008ryd.2/74438, intron 2 of 2)	4	9269317	9451691	182375	65975	ENSMUSG00000041216	Clvs1
Peak_33492	chr19	15371688	15372481	794	3.62266	4.48887	156.906	7.02978e-11	5.40668e-09	Distal Intergenic	19	15905123	15909712	4590	537231	ENSMUSG00000024640	Psat1
Peak_22723	chr15	12733456	12734001	546	3.10811	3.64526	142.117	7.1114e-11	5.46299e-09	Intron (uc007vhu.1/68070, intron 1 of 3)	15	12457798	12739924	282127	5923	ENSMUSG00000022197	Pdzd2
Peak_23477	chr15	41665608	41666426	819	-2.99206	3.81587	142.102	7.11878e-11	5.46299e-09	Intron (uc007vot.2/170719, intron 3 of 16)	15	41710604	41820578	109975	-44178	ENSMUSG00000022307	Oxr1
Peak_25896	chr16	23659683	23660541	859	-2.81664	4.29558	142.045	7.14534e-11	5.47373e-09	Distal Intergenic	16	23609919	23614222	4304	49764	ENSMUSG00000033355	Rtp4
Peak_13958	chr12	39751291	39751729	439	3.95691	3.57402	142.038	7.14858e-11	5.47373e-09	Distal Intergenic	12	40005447	40037376	31930	285647	ENSMUSG00000047446	Arl4a
Peak_32509	chr18	68902037	68902539	503	4.71023	3.5187	144.288	7.18321e-11	5.49416e-09	Intron (uc029tpa.1/78931, intron 3 of 6)	18	68889487	68951528	62042	48989	NA	4930546C10Rik
Peak_46152	chr4	41289825	41290276	452	3.78173	3.33387	141.891	7.21767e-11	5.51443e-09	Downstream (1-2kb)	4	41194315	41275135	80821	-14690	ENSMUSG00000028433	Ubap2
Peak_18301	chr13	85926603	85927634	1032	-2.38955	4.75308	143.277	7.24769e-11	5.53126e-09	Distal Intergenic	13	86044798	86046795	1998	119161	ENSMUSG00000017778	Cox7c
Peak_49542	chr5	12938015	12938809	795	-3.55251	4.38636	156.318	7.26747e-11	5.54025e-09	Distal Intergenic	5	13125414	13524707	399294	-186605	ENSMUSG00000028883	Sema3a
Peak_38104	chr2	115249847	115250958	1112	-2.78768	4.1607	141.742	7.28828e-11	5.54178e-09	Distal Intergenic	2	115329266	115344280	15015	93322	ENSMUSG00000087309	4930528P14Rik
Peak_36017	chr2	43786021	43786682	662	-2.81597	4.11012	141.716	7.30065e-11	5.54178e-09	Intron (uc008jou.2/76117, intron 2 of 5)	2	43748824	44395953	647130	37197	ENSMUSG00000049744	Arhgap15
Peak_25536	chr16	11012483	11013156	674	2.63153	4.35054	141.712	7.30265e-11	5.54178e-09	Intron (uc007yeo.1/100043147, intron 2 of 2)	16	11008898	11015184	6287	3585	ENSMUSG00000097056	Gm4262
Peak_20011	chr14	27166593	27167606	1014	2.0387	5.42922	147.979	7.30739e-11	5.54178e-09	Intron (uc007sto.2/71704, intron 3 of 13)	14	27143993	27403911	259919	22600	ENSMUSG00000021895	Arhgef3
Peak_5283	chr1	188468341	188468878	538	2.99781	4.33154	142.265	7.30951e-11	5.54178e-09	Intron (uc007eaf.1/22283, intron 20 of 70)	1	188537698	188678687	140990	-68820	ENSMUSG00000026609	Ush2a
Peak_66456	chr9	90490607	90491090	484	-2.30537	4.6477	141.65	7.33253e-11	5.55315e-09	Distal Intergenic	9	90239029	90270769	31741	-219838	ENSMUSG00000037410	Tbc1d2b
Peak_16172	chr13	8529975	8530504	530	3.34265	3.23756	141.63	7.34226e-11	5.55444e-09	Intron (uc007pkf.2/94191, intron 1 of 9)	13	8202866	8768762	565897	327109	ENSMUSG00000052551	Adarb2
Peak_65500	chr9	56881468	56881927	460	3.14645	3.91729	141.581	7.36562e-11	5.55905e-09	Intron (uc009ptl.1/121021, intron 1 of 4)	9	56885235	56896207	10973	-3308	ENSMUSG00000032911	Cspg4
Peak_19958	chr14	24655453	24656128	676	2.96094	4.012	141.579	7.36691e-11	5.55905e-09	Distal Intergenic	14	24490681	24496146	5466	164772	ENSMUSG00000025290	Rps24
Peak_19995	chr14	25740079	25740708	630	2.60433	4.37049	141.567	7.37245e-11	5.55905e-09	Intron (uc011zho.1/71918, intron 2 of 3)	14	25711640	25768856	57217	28148	ENSMUSG00000055538	Zcchc24
Peak_33505	chr19	15692313	15693078	766	-2.51545	4.53952	141.55	7.38093e-11	5.55939e-09	Distal Intergenic	19	15905123	15909712	4590	216634	ENSMUSG00000024640	Psat1
Peak_20246	chr14	37013606	37014293	688	2.18351	5.00085	142.521	7.42027e-11	5.58087e-09	Distal Intergenic	14	37034909	37049014	14106	34721	ENSMUSG00000021804	Rgr
Peak_56987	chr6	140604756	140605514	759	3.23307	4.16167	142.498	7.42557e-11	5.58087e-09	Distal Intergenic	6	140589646	140597109	7464	15110	ENSMUSG00000030231	Plekha5
Peak_8551	chr10	99242033	99242454	422	3.46751	3.33221	141.403	7.45258e-11	5.59509e-09	Distal Intergenic	10	99263231	99267489	4259	-20777	ENSMUSG00000019960	Dusp6
Peak_39820	chr2	168343594	168344141	548	-3.35495	3.71122	141.288	7.50913e-11	5.62704e-09	Distal Intergenic	2	168261698	168269331	7634	-74263	ENSMUSG00000074575	Kcng1
Peak_55637	chr6	97434755	97435203	449	3.34751	3.23827	141.283	7.51139e-11	5.62704e-09	Intron (uc009dau.1/232288, intron 1 of 22)	6	97286867	97459258	172392	24055	ENSMUSG00000030064	Frmd4b
Peak_14627	chr12	66615064	66615456	393	4.13928	3.37518	141.223	7.54125e-11	5.6433e-09	Intron (uc007nrl.3/320772, intron 8 of 15)	12	66283379	66284401	1023	-330663	ENSMUSG00000060499	Rpl10l
Peak_31840	chr18	49863377	49863828	452	3.43654	3.31502	141.197	7.55386e-11	5.64663e-09	Intron (uc008ewo.2/240283, intron 10 of 42)	18	49893219	49933274	40056	-29391	ENSMUSG00000037416	Dmxl1
Peak_3772	chr1	143710030	143710745	716	-3.35635	3.95538	141.907	7.58629e-11	5.66476e-09	Distal Intergenic	1	143603276	143702893	99618	-7137	ENSMUSG00000026361	Cdc73
Peak_9540	chr10	128705417	128705980	564	3.25493	3.78888	141.105	7.59975e-11	5.66869e-09	Promoter (<=1kb)	10	128706258	128720238	13981	-278	ENSMUSG00000025359	Pmel
Peak_52881	chr5	142473603	142473961	359	3.78717	3.24692	141.063	7.62118e-11	5.67548e-09	Exon (uc009aiq.1/231855, exon 11 of 17)	5	142470290	142470556	267	3313	ENSMUSG00000039623	Ap5z1
Peak_58832	chr7	77132599	77133356	758	2.22293	4.9604	142.381	7.62958e-11	5.67548e-09	Distal Intergenic	7	76411062	76766605	355544	721537	ENSMUSG00000025754	Agbl1
Peak_4774	chr1	172503412	172503844	433	2.3516	4.18619	141.022	7.64145e-11	5.67548e-09	Intron (uc007dqp.1/21346, intron 1 of 4)	1	172500246	172507375	7130	3166	ENSMUSG00000026547	Tagln2
Peak_12486	chr11	106639090	106639591	502	-3.40779	3.19173	141.022	7.64165e-11	5.67548e-09	Distal Intergenic	11	106502139	106612930	110792	-26160	ENSMUSG00000040548	Tex2
Peak_69089	chrX	163117676	163118330	655	-2.85452	4.13539	140.989	7.65828e-11	5.68174e-09	Distal Intergenic	20	162961992	162964599	2608	-153077	ENSMUSG00000040808	S100g
Peak_23773	chr15	56344375	56345028	654	3.19478	4.13084	141.016	7.68424e-11	5.69122e-09	Distal Intergenic	15	56689944	56694460	4517	-344916	ENSMUSG00000086541	Has2os
Peak_1703	chr1	66655064	66656067	1004	1.70511	5.02265	140.905	7.70076e-11	5.69122e-09	Intron (uc007bih.2/329178, intron 51 of 64)	1	66679564	66699148	19585	-23497	ENSMUSG00000055567	Unc80
Peak_54105	chr6	37340563	37341066	504	3.36911	3.53378	140.899	7.70379e-11	5.69122e-09	Intron (uc009bjf.2/208647, intron 8 of 11)	6	36846022	37299976	453955	-40587	ENSMUSG00000038665	Dgki
Peak_16510	chr13	20454241	20454820	580	2.43852	4.89849	145.076	7.70908e-11	5.69122e-09	Intron (uc007ppn.3/140580, intron 16 of 21)	13	20472990	20592444	119455	-18170	ENSMUSG00000041112	Elmo1
Peak_13940	chr12	39328436	39328784	349	3.52827	3.59739	140.882	7.71217e-11	5.69122e-09	Distal Intergenic	12	38783711	38868215	84505	544725	ENSMUSG00000004151	Etv1
Peak_44716	chr3	146017008	146018282	1275	1.78246	4.90545	140.813	7.74783e-11	5.71145e-09	Intron (uc008rqv.2/214804, intron 6 of 6)	3	145987870	146021720	33851	29138	ENSMUSG00000036863	Syde2
Peak_4352	chr1	163281721	163282343	623	2.78124	4.10193	140.617	7.8486e-11	5.77958e-09	Intron (uc007dhh.1/18933, intron 1 of 4)	1	163245119	163313650	68532	31307	ENSMUSG00000026586	Prrx1
Peak_50826	chr5	55691144	55691789	646	-3.54994	3.86844	141.939	7.90403e-11	5.80905e-09	Distal Intergenic	5	54349992	54358542	8551	1341152	ENSMUSG00000105912	Gm10440
Peak_20778	chr14	59780272	59780747	476	3.41694	3.43227	140.508	7.9054e-11	5.80905e-09	Intron (uc007uet.1/50769, intron 29 of 35)	14	59647741	59685041	37301	-95231	ENSMUSG00000021983	Atp8a2
Peak_17945	chr13	73673163	73673624	462	3.63314	3.5153	140.413	7.95471e-11	5.83908e-09	Intron (uc007rds.2/22598, intron 4 of 11)	13	73661750	73678023	16274	4399	ENSMUSG00000021612	Slc6a18
Peak_15327	chr12	91015103	91015672	570	3.74189	3.98619	143.907	7.98958e-11	5.85527e-09	Intron (uc007oki.1/75216, intron 3 of 5)	12	90998492	91030078	31587	14406	ENSMUSG00000061533	Cep128
Peak_57221	chr6	146935302	146935731	430	3.99519	3.07797	140.34	7.99368e-11	5.85527e-09	Intron (uc009esm.2/67533, intron 1 of 26)	6	146951301	146954421	3121	18690	ENSMUSG00000040163	1700034J05Rik
Peak_27858	chr16	96753521	96754236	716	2.64538	4.30076	140.316	8.00605e-11	5.85813e-09	Intron (uc008add.2/13508, intron 11 of 32)	16	96592079	96622824	30746	-130697	ENSMUSG00000050272	Dscam
Peak_7399	chr10	66546488	66547022	535	-3.50259	3.91631	142.349	8.03007e-11	5.8695e-09	Distal Intergenic	10	66145296	66179514	34219	401192	ENSMUSG00000112210	4930407I19Rik
Peak_55537	chr6	93395226	93395736	511	-3.07237	3.35673	140.253	8.03975e-11	5.87037e-09	Distal Intergenic	6	92940582	93272977	332396	454644	ENSMUSG00000097462	9530026P05Rik
Peak_45389	chr4	9674683	9675085	403	3.27468	3.41949	140.203	8.06624e-11	5.88351e-09	Distal Intergenic	4	9449085	9669344	220260	-5339	ENSMUSG00000028207	Asph
Peak_67089	chr9	110438373	110438846	474	3.85377	3.60639	140.187	8.07477e-11	5.88354e-09	Intron (uc009rua.1/270201, intron 5 of 9)	9	110419808	110423012	3205	18565	ENSMUSG00000032484	Ngp
Peak_34501	chr19	48240929	48241437	509	2.59083	4.45901	140.124	8.10844e-11	5.90185e-09	Intron (uc008hvx.1/66673, intron 1 of 26)	19	48206025	48805505	599481	34904	ENSMUSG00000063434	Sorcs3
Peak_8853	chr10	109322492	109323223	732	3.93294	4.23839	150.603	8.13925e-11	5.91806e-09	Distal Intergenic	10	108497650	109010975	513326	-311517	ENSMUSG00000035864	Syt1
Peak_82	chr1	7138495	7139733	1239	2.34922	4.66462	140.037	8.15535e-11	5.92354e-09	Intron (uc007agb.1/319263, intron 2 of 5)	1	7160085	7173628	13544	-20352	ENSMUSG00000051285	Pcmtd1
Peak_24853	chr15	88839189	88839739	551	2.91612	4.42512	141.352	8.19361e-11	5.94509e-09	Distal Intergenic	15	88819646	88826681	7036	19543	ENSMUSG00000023272	Creld2
Peak_37647	chr2	101863189	101863591	403	3.46304	3.43437	139.938	8.20903e-11	5.95004e-09	Distal Intergenic	2	101886262	101901639	15378	-22671	ENSMUSG00000027163	Commd9
Peak_46062	chr4	34993039	34993912	874	-2.0507	4.99822	139.881	8.24047e-11	5.96658e-09	Intron (uc008sgs.2/214944, intron 2 of 3)	4	34909789	34911481	1693	-81558	ENSMUSG00000085824	Platr9
Peak_35599	chr2	29831188	29831534	347	4.5611	2.88051	139.818	8.27486e-11	5.98522e-09	Intron (uc008jag.1/68205, intron 1 of 4)	2	29827389	29844996	17608	3799	ENSMUSG00000069020	Urm1
Peak_38550	chr2	130032527	130033029	503	-3.67542	3.25243	139.68	8.35104e-11	6.03402e-09	Intron (uc008mig.2/21818, intron 7 of 12)	2	130016292	130016408	117	-16119	ENSMUSG00000098347	Mir6339
Peak_20614	chr14	54935898	54936892	995	2.56431	4.91518	146.621	8.39759e-11	6.06133e-09	Promoter (<=1kb)	14	54936470	54939277	2808	0	ENSMUSG00000040759	Cmtm5
Peak_9030	chr10	114957950	114958421	472	-2.99129	3.56454	139.509	8.44633e-11	6.09016e-09	Distal Intergenic	10	114787494	114801370	13877	-156580	ENSMUSG00000050663	Trhde
Peak_8097	chr10	86193815	86194447	633	3.25173	3.95915	139.467	8.46973e-11	6.10067e-09	Intron (uc007gnn.2/27204, intron 6 of 13)	10	86095854	86113585	17732	97961	ENSMUSG00000112493	4930486F22Rik
Peak_24520	chr15	78704794	78705379	586	2.9802	3.70855	139.4	8.50793e-11	6.12182e-09	Intron (uc007wrf.1/207393, intron 1 of 1)	15	78670007	78718113	48107	12734	ENSMUSG00000043460	Elfn2
Peak_45720	chr4	22066792	22067467	676	-2.71455	3.91309	139.367	8.52627e-11	6.12864e-09	Distal Intergenic	4	21931326	22001461	70136	135466	ENSMUSG00000028246	Faxc
Peak_54625	chr6	56063741	56064240	500	3.74108	3.73479	139.306	8.56093e-11	6.14717e-09	Distal Intergenic	6	56017515	56032688	15174	46226	ENSMUSG00000002930	Ppp1r17
Peak_34737	chr19	58856026	58856549	524	3.6712	3.99973	142.697	8.59657e-11	6.16637e-09	Intron (uc008iaw.1/73442, intron 1 of 11)	19	58795751	58860984	65234	4435	ENSMUSG00000025092	Hspa12a
Peak_14848	chr12	74109433	74109987	555	-4.04612	3.60892	141.709	8.75323e-11	6.27224e-09	Intron (uc007nwu.1/238266, intron 1 of 6)	12	73997761	74267916	270156	111672	ENSMUSG00000044912	Syt16
Peak_14826	chr12	73735960	73736356	397	4.14362	3.55648	138.95	8.76658e-11	6.27531e-09	Intron (uc007nwn.2/18755, intron 10 of 13)	12	73584796	73778184	193389	151164	ENSMUSG00000021108	Prkch
Peak_47362	chr4	85707144	85707972	829	2.22105	5.31719	147.679	8.77826e-11	6.27718e-09	Intron (uc008tlp.1/uc008tlp.1, intron 1 of 2)	4	86053915	86199516	145602	-345943	ENSMUSG00000066113	Adamtsl1
Peak_59806	chr7	114897264	114897679	416	-3.82168	2.88532	138.859	8.82019e-11	6.2933e-09	Distal Intergenic	7	114948650	114983967	35318	-50971	ENSMUSG00000108379	A730082K24Rik
Peak_24835	chr15	87715248	87715823	576	2.79779	4.12315	138.859	8.82024e-11	6.2933e-09	Intron (uc007xee.1/106014, intron 2 of 3)	15	87795850	87795943	94	80120	ENSMUSG00000098938	Mir6393
Peak_37984	chr2	110364960	110365442	483	2.96865	4.07307	138.841	8.83086e-11	6.2933e-09	Promoter (1-2kb)	2	110360925	110362993	2069	-1967	ENSMUSG00000074971	Fibin
Peak_41297	chr3	47668857	47669269	413	-3.34988	3.67094	138.83	8.83717e-11	6.2933e-09	Distal Intergenic	3	48026012	48026759	748	357490	ENSMUSG00000103257	Gm7977
Peak_42998	chr3	101274034	101274586	553	2.73107	4.2481	138.688	8.92152e-11	6.34684e-09	Downstream (1-2kb)	3	101275908	101287939	12032	13353	ENSMUSG00000027863	Cd2
Peak_52955	chr5	145103966	145104865	900	3.90177	4.34404	152.567	9.00915e-11	6.4026e-09	Exon (uc009ama.1/56443, exon 7 of 10)	5	145114256	145128186	13931	-9391	ENSMUSG00000029622	Arpc1b
Peak_7274	chr10	60794362	60794801	440	-3.51651	3.12299	138.5	9.03443e-11	6.41075e-09	Intron (uc007ffd.1/107449, intron 1 of 15)	10	60762595	60820641	58047	25840	ENSMUSG00000020099	Unc5b
Peak_22483	chr15	4943170	4943782	613	3.26862	3.57245	138.492	9.03914e-11	6.41075e-09	Exon (uc011zqx.1/223825, exon 31 of 42)	15	4898737	4962201	63465	44433	ENSMUSG00000022155	Mroh2b
Peak_16022	chr12	118719899	118720712	814	-3.51465	4.22615	147.759	9.07342e-11	6.42475e-09	Distal Intergenic	12	118846329	118852578	6250	-125617	ENSMUSG00000048562	Sp8
Peak_61859	chr8	48376579	48377202	624	-2.85104	4.40439	142.159	9.07744e-11	6.42475e-09	Intron (uc009lrr.2/23965, intron 4 of 26)	8	48275915	48300099	24185	-76480	ENSMUSG00000031561	Tenm3
Peak_5315	chr1	189761662	189762164	503	3.57008	3.43979	138.393	9.09935e-11	6.43368e-09	Promoter (<=1kb)	1	189762598	189876693	114096	-434	ENSMUSG00000026604	Ptpn14
Peak_34475	chr19	47542139	47542745	607	3.53509	3.91966	138.256	9.18323e-11	6.48636e-09	Distal Intergenic	19	47524202	47537020	12819	-5119	ENSMUSG00000042694	Stn1
Peak_60086	chr7	125112627	125113414	788	-2.92499	3.92564	138.171	9.23564e-11	6.51179e-09	Distal Intergenic	7	125331782	125349786	18005	236372	ENSMUSG00000045928	4933440M02Rik
Peak_36330	chr2	52964404	52964930	527	3.16909	3.89587	138.167	9.23805e-11	6.51179e-09	Intron (uc008jrh.1/71409, intron 1 of 26)	2	52857868	53134202	276335	106536	ENSMUSG00000036053	Fmnl2
Peak_42038	chr3	69175257	69175590	334	-3.53301	3.09651	138.119	9.26788e-11	6.52617e-09	Distal Intergenic	3	69131233	69157177	25945	44024	ENSMUSG00000094763	Gm1647
Peak_67285	chr9	118747821	118748407	587	4.11247	3.69575	139.434	9.29418e-11	6.53804e-09	Intron (uc009rzw.2/104099, intron 15 of 27)	9	118711692	118901003	189312	36129	ENSMUSG00000039115	Itga9
Peak_26199	chr16	33010043	33010529	487	4.05727	3.6602	138.478	9.32264e-11	6.5514e-09	Intron (uc007yzs.1/70144, intron 20 of 20)	16	33014270	33056186	41917	45657	ENSMUSG00000035578	Iqcg
Peak_1002	chr1	42152099	42152808	710	2.7587	4.21733	137.978	9.35597e-11	6.56815e-09	Distal Intergenic	1	42648200	42667672	19473	514864	ENSMUSG00000060424	Pantr1
Peak_4022	chr1	154189923	154190819	897	2.72082	4.38901	137.927	9.38806e-11	6.584e-09	Distal Intergenic	1	154201187	154205674	4488	-10368	ENSMUSG00000066797	Zfp648
Peak_58291	chr7	58344379	58344935	557	-3.77355	3.58069	137.841	9.44233e-11	6.61088e-09	Distal Intergenic	7	58658202	58829426	171225	-313267	ENSMUSG00000025324	Atp10a
Peak_61005	chr8	18506399	18506791	393	-3.36444	3.09648	137.826	9.45233e-11	6.61088e-09	Distal Intergenic	8	18595173	18632901	37729	-88382	ENSMUSG00000039842	Mcph1
Peak_59298	chr7	96168827	96169333	507	-2.48473	4.35133	137.821	9.45503e-11	6.61088e-09	Promoter (1-2kb)	7	96171244	96911092	739849	-1911	ENSMUSG00000048078	Tenm4
Peak_53322	chr6	8421954	8422887	934	-2.16801	4.76865	137.73	9.51303e-11	6.64472e-09	Intron (uc009axm.2/100036521, intron 3 of 3)	6	8492423	8509161	16739	86274	ENSMUSG00000087305	A430035B10Rik
Peak_55577	chr6	94714940	94715669	730	-3.0704	3.69042	137.652	9.56314e-11	6.67299e-09	Distal Intergenic	6	94604910	94700145	95236	-14795	ENSMUSG00000030029	Lrig1
Peak_16687	chr13	24446917	24447365	449	3.70202	3.38959	137.501	9.66104e-11	6.73271e-09	Intron (uc007pvq.3/12763, intron 12 of 17)	13	24416903	24477289	60387	30014	ENSMUSG00000016756	Cmah
Peak_67432	chr9	122621159	122621802	644	3.97736	3.65716	137.49	9.66818e-11	6.73271e-09	Intron (uc009sfb.2/319626, intron 2 of 5)	9	122572501	122679596	107096	48658	ENSMUSG00000097736	9530059O14Rik
Peak_1151	chr1	50770228	50770696	469	3.17017	4.16329	138.689	9.76443e-11	6.78359e-09	Distal Intergenic	1	50909962	50979920	69959	-139266	ENSMUSG00000026109	Tmeff2
Peak_45070	chr3	156149378	156149818	441	-2.85389	3.7844	137.336	9.76919e-11	6.78359e-09	Distal Intergenic	3	155976354	156008592	32239	173024	ENSMUSG00000104553	9330178D15Rik
Peak_38358	chr2	122605869	122606207	339	3.58171	3.48685	137.32	9.77964e-11	6.78359e-09	Intron (uc008maw.2/67092, intron 2 of 8)	2	122594473	122611277	16805	5070	ENSMUSG00000027199	Gatm
Peak_4397	chr1	164590136	164590847	712	-2.41844	4.68926	138.665	9.78044e-11	6.78359e-09	Distal Intergenic	1	164437099	164458355	21257	-131781	ENSMUSG00000026576	Atp1b1
Peak_36289	chr2	52326967	52327763	797	-3.51278	3.72106	137.256	9.82175e-11	6.8001e-09	Exon (uc008jqv.1/17996, exon 6 of 157)	2	52136647	52338798	202152	11035	ENSMUSG00000026950	Neb
Peak_53114	chr5	151174572	151175166	595	3.26467	3.89959	137.253	9.82389e-11	6.8001e-09	Intron (uc009aum.2/243362, intron 1 of 13)	5	151037515	151190193	152679	15027	ENSMUSG00000016128	Stard13
Peak_22411	chr14	122883567	122884096	530	-2.68045	3.82314	136.971	1.00128e-10	6.92393e-09	Intron (uc007vbe.2/110821, intron 22 of 23)	14	122816223	122913165	96943	29069	ENSMUSG00000041625	Ggact
Peak_51565	chr5	89784490	89785288	799	2.48642	4.68213	137.505	1.00312e-10	6.92973e-09	Intron (uc008yaq.2/330119, intron 3 of 21)	5	89673841	89883334	209494	98046	ENSMUSG00000043635	Adamts3
Peak_18777	chr13	101902071	101902834	764	-2.91802	4.18225	136.879	1.0126e-10	6.98826e-09	Distal Intergenic	13	101755571	101768217	12647	-133854	ENSMUSG00000041417	Pik3r1
Peak_62943	chr8	85785325	85785981	657	3.3292	4.02281	136.787	1.01378e-10	6.9894e-09	Intron (uc009mqf.2/71927, intron 6 of 17)	8	85717557	85840949	123393	54968	ENSMUSG00000031703	Itfg1
Peak_8476	chr10	96955275	96956734	1460	-1.56045	5.54107	136.723	1.01816e-10	7.01262e-09	Distal Intergenic	10	97035768	97061059	25292	-79034	ENSMUSG00000111924	4930556N09Rik
Peak_66546	chr9	94482598	94483744	1147	1.95308	5.15939	136.703	1.0196e-10	7.01555e-09	Distal Intergenic	9	94517864	94538081	20218	54337	ENSMUSG00000045414	1190002N15Rik
Peak_22073	chr14	111995940	111996581	642	-3.46855	3.86373	137.995	1.02494e-10	7.04529e-09	Distal Intergenic	14	111675115	111683135	8021	320825	ENSMUSG00000033214	Slitrk5
Peak_18491	chr13	93785932	93786617	686	3.26218	4.03315	136.511	1.03289e-10	7.09292e-09	Intron (uc011zcv.1/11881, intron 1 of 5)	13	93790777	93790837	61	-4160	ENSMUSG00000093480	Mir5624
Peak_5483	chr1	194835275	194835872	598	-3.59492	3.71967	136.765	1.03731e-10	7.11622e-09	Distal Intergenic	1	194804710	194816868	12159	30565	ENSMUSG00000026640	Plxna2
Peak_43497	chr3	115968769	115969630	862	2.14162	4.70076	136.402	1.0406e-10	7.13059e-09	Intron (uc008rbt.2/66500, intron 8 of 10)	3	115979902	115979955	54	-10272	ENSMUSG00000089261	Mir669n
Peak_61537	chr8	36581010	36581463	454	3.12317	3.77157	136.389	1.04147e-10	7.13059e-09	Intron (uc009llq.2/50768, intron 6 of 13)	8	36567739	36613943	46205	32480	ENSMUSG00000031523	Dlc1
Peak_15423	chr12	97361513	97362220	708	2.70656	4.2239	136.372	1.04271e-10	7.13206e-09	Distal Intergenic	12	98202300	98259459	57160	897239	ENSMUSG00000021003	Galc
Peak_3117	chr1	126024219	126025024	806	2.63703	4.77574	142.258	1.04503e-10	7.14086e-09	Exon (uc011wqy.1/210356, exon 7 of 12)	1	125867622	125912928	45307	-111291	ENSMUSG00000026344	Lypd1
Peak_42264	chr3	80004873	80005390	518	3.21762	4.61234	149.351	1.04645e-10	7.14353e-09	Distal Intergenic	3	79885930	79946278	60349	118943	ENSMUSG00000027955	Fam198b
Peak_6076	chr10	20202749	20203243	495	2.95838	4.13098	136.291	1.0484e-10	7.14769e-09	Promoter (<=1kb)	10	20199247	20201854	2608	-895	ENSMUSG00000110754	4930405J17Rik
Peak_66498	chr9	92360641	92361204	564	2.97654	4.04913	136.281	1.04913e-10	7.14769e-09	Distal Intergenic	9	92343451	92357876	14426	17190	ENSMUSG00000074139	1700057G04Rik
Peak_48120	chr4	111004609	111005396	788	-3.25381	4.45782	149.093	1.05058e-10	7.15058e-09	Intron (uc008udb.2/78933, intron 4 of 8)	4	111415006	111460298	45293	-409610	ENSMUSG00000028545	Bend5
Peak_23701	chr15	54196979	54197805	827	3.00698	4.20473	136.246	1.05163e-10	7.15068e-09	Distal Intergenic	15	54250619	54278484	27866	80679	ENSMUSG00000063727	Tnfrsf11b
Peak_1424	chr1	57789840	57790957	1118	1.89409	4.65489	136.218	1.05362e-10	7.15716e-09	Intron (uc007bbd.2/67198, intron 1 of 13)	1	57774861	57948397	173537	14979	ENSMUSG00000038305	Spats2l
Peak_63575	chr8	110687510	110688379	870	2.3734	4.60198	136.175	1.05669e-10	7.171e-09	Intron (uc009nku.1/234729, intron 14 of 14)	8	110713157	110720398	7242	-24778	ENSMUSG00000010936	Vac14
Peak_68241	chrX	84860117	84860712	596	2.55627	4.19288	136.154	1.0582e-10	7.1742e-09	Intron (uc009tri.2/13405, intron 60 of 78)	20	84772711	84975707	202997	87406	ENSMUSG00000045103	Dmd
Peak_26401	chr16	39103344	39104048	705	-2.67756	3.63766	136.094	1.06256e-10	7.1967e-09	Distal Intergenic	16	38902345	39027157	124813	200999	ENSMUSG00000022790	Igsf11
Peak_34495	chr19	48081494	48081805	312	-3.47458	2.89565	136.062	1.06487e-10	7.20528e-09	Distal Intergenic	19	48206025	48805505	599481	-124220	ENSMUSG00000063434	Sorcs3
Peak_8714	chr10	105467313	105467708	396	3.479	3.43551	136.022	1.06776e-10	7.21783e-09	Intron (uc007gym.1/278279, intron 1 of 11)	10	105187664	105574479	386816	106771	ENSMUSG00000036019	Tmtc2
Peak_65205	chr9	45486901	45487738	838	3.27027	3.93443	135.983	1.07058e-10	7.22983e-09	Intron (uc009pfx.1/114873, intron 5 of 7)	9	45416626	45431232	14607	-55669	ENSMUSG00000097074	4833428L15Rik
Peak_6162	chr10	21930824	21931534	711	3.05603	3.9644	135.862	1.07947e-10	7.28272e-09	Intron (uc007eov.2/20393, intron 2 of 13)	10	21978672	21999902	21231	-47138	ENSMUSG00000019970	Sgk1
Peak_55594	chr6	95202067	95203290	1224	1.81408	5.28052	135.807	1.08353e-10	7.29632e-09	Distal Intergenic	6	95117880	95129793	11914	84187	ENSMUSG00000030031	Kbtbd8
Peak_53947	chr6	31604900	31605428	529	3.45181	3.75097	135.806	1.08359e-10	7.29632e-09	Distal Intergenic	6	31519493	31563937	44445	-40963	ENSMUSG00000025608	Podxl
Peak_22440	chr14	124036656	124037144	489	-2.74475	3.43144	135.745	1.08809e-10	7.31754e-09	Intron (uc007vbv.2/14169, intron 3 of 4)	14	123987635	124015684	28050	49021	ENSMUSG00000099994	1700024B18Rik
Peak_27591	chr16	88244568	88245050	483	-3.95976	3.67705	139.355	1.08886e-10	7.31754e-09	Intron (uc007zur.2/14805, intron 1 of 16)	16	87895897	88290258	394362	45208	ENSMUSG00000022935	Grik1
Peak_4842	chr1	175188203	175188656	454	3.06705	3.6563	135.644	1.09556e-10	7.35007e-09	Intron (uc007dtk.2/24012, intron 4 of 16)	1	175059076	175086226	27151	-101977	ENSMUSG00000026527	Rgs7
Peak_47925	chr4	104269889	104270508	620	3.27123	3.4792	135.641	1.09582e-10	7.35007e-09	Intron (uc008txu.1/13131, intron 3 of 9)	4	104367538	104680389	312852	-97030	ENSMUSG00000028519	Dab1
Peak_14630	chr12	66679482	66679985	504	3.43986	3.6505	135.619	1.09744e-10	7.35378e-09	Intron (uc007nrl.3/320772, intron 6 of 15)	12	66283379	66284401	1023	-395081	ENSMUSG00000060499	Rpl10l
Peak_30253	chr17	88545860	88546173	314	4.11915	3.01575	135.568	1.10132e-10	7.37263e-09	Intron (uc008dvo.2/73825, intron 3 of 21)	17	88530124	88588367	58244	15736	ENSMUSG00000034709	Ppp1r21
Peak_48188	chr4	115753987	115754492	506	4.33703	3.54049	136.424	1.11103e-10	7.43048e-09	Intron (uc008ufe.1/230648, intron 4 of 4)	4	115740392	115774351	33960	13595	ENSMUSG00000034210	Efcab14
Peak_51893	chr5	102578446	102578834	389	3.59327	3.48153	135.39	1.11472e-10	7.44798e-09	Intron (uc008yiu.1/231532, intron 2 of 2)	5	102481391	102897937	416547	97055	ENSMUSG00000057315	Arhgap24
Peak_53809	chr6	28219545	28219771	227	4.05426	2.93306	135.208	1.12868e-10	7.52759e-09	Distal Intergenic	6	28239931	28261601	21671	41830	ENSMUSG00000039841	Zfp800
Peak_19160	chr13	111943523	111944537	1015	2.01781	5.10219	135.236	1.12881e-10	7.52759e-09	Distal Intergenic	13	111867936	111871937	4002	75587	ENSMUSG00000086111	Gm15326
Peak_44794	chr3	147455319	147455943	625	-2.75157	3.89211	135.027	1.14275e-10	7.6132e-09	Distal Intergenic	3	146943920	146984008	40089	511399	ENSMUSG00000036745	Ttll7
Peak_28968	chr17	47914654	47915308	655	-2.60844	3.84862	134.952	1.14864e-10	7.64508e-09	Intron (uc008cwm.2/74123, intron 1 of 16)	17	47867133	47924632	57500	9324	ENSMUSG00000023991	Foxp4
Peak_43858	chr3	125870421	125871002	582	3.58149	3.79111	134.791	1.16136e-10	7.71562e-09	Intron (uc008rfy.1/22239, intron 4 of 4)	3	125865343	125915882	50540	44880	ENSMUSG00000032854	Ugt8a
Peak_59143	chr7	89456261	89456872	612	3.25855	3.70064	134.789	1.16147e-10	7.71562e-09	Distal Intergenic	7	89426306	89432077	5772	29955	ENSMUSG00000109311	AI314278
Peak_59781	chr7	113828177	113828770	594	-3.47821	3.36424	134.772	1.16287e-10	7.71751e-09	Intron (uc009jhu.2/233744, intron 2 of 5)	7	113765998	114043375	277378	62179	ENSMUSG00000038156	Spon1
Peak_50310	chr5	38558277	38558612	336	3.18368	4.1788	136.21	1.17003e-10	7.75344e-09	Promoter (2-3kb)	5	38526813	38561595	34783	2983	ENSMUSG00000005103	Wdr1
Peak_41195	chr3	41125092	41125595	504	3.3171	4.01968	134.676	1.17052e-10	7.75344e-09	Distal Intergenic	3	41066326	41083046	16721	-42046	ENSMUSG00000049940	Pgrmc2
Peak_24964	chr15	92762454	92762996	543	4.39573	3.3408	134.612	1.17568e-10	7.78018e-09	Intron (uc011zye.1/239618, intron 9 of 9)	15	92597109	92771819	174711	165345	ENSMUSG00000036218	Pdzrn4
Peak_37015	chr2	73443906	73444471	566	3.6743	3.82515	135.064	1.17698e-10	7.78132e-09	Exon (uc008kcu.2/215280, exon 3 of 8)	2	73429610	73453889	24280	9418	ENSMUSG00000075284	Wipf1
Peak_60852	chr8	12282196	12282526	331	-4.14658	2.94834	134.548	1.18085e-10	7.79945e-09	Distal Intergenic	8	12385771	12436732	50962	-103245	ENSMUSG00000047935	Sox1ot
Peak_29523	chr17	66944372	66944920	549	3.38358	3.66629	134.5	1.18473e-10	7.81761e-09	Promoter (<=1kb)	17	66813882	66944442	130561	0	ENSMUSG00000033278	Ptprm
Peak_19637	chr14	11941793	11942491	699	-3.04966	3.61786	134.455	1.18841e-10	7.83445e-09	Intron (uc007sfl.1/19270, intron 2 of 3)	14	12189943	12242039	52097	-247452	ENSMUSG00000021745	Ptprg
Peak_61874	chr8	48665160	48665674	515	-3.13935	3.58652	134.418	1.19147e-10	7.83497e-09	Intron (uc009lrr.2/23965, intron 1 of 26)	8	48225665	48674690	449026	9016	ENSMUSG00000031561	Tenm3
Peak_26413	chr16	39530698	39531581	884	-3.35068	3.79225	134.413	1.19184e-10	7.83497e-09	Distal Intergenic	16	39984371	42176292	2191922	-452790	ENSMUSG00000061080	Lsamp
Peak_63229	chr8	95502388	95502805	418	3.29034	3.72749	134.413	1.19188e-10	7.83497e-09	Distal Intergenic	8	95450737	95488820	38084	-13568	ENSMUSG00000046707	Csnk2a2
Peak_3115	chr1	126011559	126012070	512	-3.15402	3.41828	134.307	1.20056e-10	7.88449e-09	Intron (uc011wqy.1/210356, intron 9 of 11)	1	125867622	125912928	45307	-98631	ENSMUSG00000026344	Lypd1
Peak_24102	chr15	66485890	66486290	401	-3.72225	2.97597	134.181	1.21102e-10	7.94569e-09	Intron (uc011ztm.1/54562, intron 2 of 11)	15	66379858	66500910	121053	14620	ENSMUSG00000022375	Lrrc6
Peak_25910	chr16	24218143	24219000	858	2.2207	4.77555	134.091	1.21853e-10	7.98739e-09	Distal Intergenic	16	24393350	24685181	291832	-174350	ENSMUSG00000033306	Lpp
Peak_47938	chr4	104719326	104719834	509	-2.81991	3.61987	134.05	1.22194e-10	7.9984e-09	Intron (uc008txw.2/13131, intron 10 of 14)	4	104766317	104804548	38232	-46483	ENSMUSG00000029656	C8b
Peak_1912	chr1	73944409	73944907	499	2.46602	4.57206	134.038	1.22295e-10	7.9984e-09	Intron (uc007blg.3/21961, intron 19 of 32)	1	73910231	73937333	27103	-7076	ENSMUSG00000055322	Tns1
Peak_64307	chr9	13765431	13766161	731	2.75552	4.01464	134.03	1.22368e-10	7.9984e-09	Intron (uc012goc.1/77116, intron 2 of 9)	9	13749181	13806481	57301	16250	ENSMUSG00000031918	Mtmr2
Peak_65708	chr9	64494545	64495071	527	3.28437	3.49914	134.005	1.22577e-10	8.00045e-09	Intron (uc009qby.2/214058, intron 1 of 7)	9	64501523	64686767	185245	-6452	ENSMUSG00000036466	Megf11
Peak_57546	chr7	19600454	19601040	587	3.00208	3.92018	133.999	1.2263e-10	8.00045e-09	Intron (uc009fml.2/53609, intron 2 of 20)	7	19581038	19604486	23449	3446	ENSMUSG00000061028	Clasrp
Peak_67655	chrX	18409524	18410028	505	3.04099	3.60529	133.871	1.23716e-10	8.06099e-09	Distal Intergenic	20	18414881	18461397	46517	51369	ENSMUSG00000037358	4930578C19Rik
Peak_9094	chr10	116416076	116416657	582	2.71701	3.91531	133.862	1.23791e-10	8.06099e-09	Promoter (1-2kb)	10	116418121	116421235	3115	-1464	ENSMUSG00000020164	Kcnmb4os1
Peak_36777	chr2	65922086	65922381	296	3.48423	3.28585	133.794	1.24368e-10	8.09095e-09	Intron (uc008jwq.2/77771, intron 3 of 6)	2	65931865	66031546	99682	-9484	ENSMUSG00000044647	Csrnp3
Peak_60305	chr7	132753707	132754606	900	2.47924	4.08155	133.639	1.25707e-10	8.17036e-09	Intron (uc009kcf.1/77938, intron 3 of 3)	7	132712084	132776916	64833	22310	ENSMUSG00000030956	Fam53b
Peak_33686	chr19	21688141	21688644	504	3.45775	3.34591	133.541	1.26561e-10	8.21814e-09	Distal Intergenic	19	21680636	21685637	5002	7505	ENSMUSG00000047368	Abhd17b
Peak_3095	chr1	125351214	125351982	769	-3.31156	4.38086	145.568	1.27432e-10	8.25647e-09	Distal Intergenic	1	125392905	125435727	42823	83745	ENSMUSG00000026341	Actr3
Peak_31440	chr18	38177122	38177606	485	-3.22775	3.33502	133.441	1.27439e-10	8.25647e-09	Distal Intergenic	18	38196694	38209762	13069	32156	ENSMUSG00000051375	Pcdh1
Peak_58401	chr7	64321697	64322019	323	4.64679	2.77327	133.433	1.27509e-10	8.25647e-09	Intron (uc009hgd.1/233315, intron 12 of 15)	7	64287670	64340806	53137	34027	ENSMUSG00000030522	Mtmr10
Peak_29240	chr17	56371645	56372000	356	4.15006	3.24406	133.411	1.27709e-10	8.2617e-09	Intron (uc008dbt.2/193796, intron 6 of 9)	17	56393718	56402873	9156	-21718	ENSMUSG00000024201	Kdm4b
Peak_56985	chr6	140593729	140594168	440	2.63361	4.14917	133.383	1.27953e-10	8.26976e-09	3' UTR	6	140589646	140597109	7464	4083	ENSMUSG00000030231	Plekha5
Peak_40729	chr3	28558205	28558935	731	-1.9468	4.7722	133.327	1.28446e-10	8.2939e-09	Intron (uc008otx.2/665113, intron 9 of 30)	3	28419943	28420018	76	138262	ENSMUSG00000092990	Mir466q
Peak_61567	chr8	38403576	38403928	353	3.32754	3.77585	133.297	1.28714e-10	8.30109e-09	Intron (uc009lme.2/244431, intron 1 of 7)	8	38252133	38252202	70	-151374	ENSMUSG00000065457	Mir383
Peak_25586	chr16	12770479	12770929	451	-3.54449	3.38755	133.288	1.28798e-10	8.30109e-09	Distal Intergenic	16	12811390	12848653	37264	-40461	ENSMUSG00000101565	1700003L19Rik
Peak_41340	chr3	50634310	50635047	738	-3.40535	4.16529	140.682	1.2894e-10	8.30165e-09	Distal Intergenic	3	50415970	50443613	27644	-190697	ENSMUSG00000027737	Slc7a11
Peak_29077	chr17	50427354	50428039	686	-1.90275	4.41446	133.26	1.29046e-10	8.30165e-09	Distal Intergenic	17	50509547	50688494	178948	-81508	ENSMUSG00000038910	Plcl2
Peak_45139	chr3	158310350	158311005	656	-2.47307	4.32405	133.22	1.294e-10	8.30981e-09	Intron (uc008rvw.2/242274, intron 5 of 27)	3	158082895	158562221	479327	251216	ENSMUSG00000028176	Lrrc7
Peak_18210	chr13	83484655	83485283	629	-3.38667	3.69497	133.219	1.29413e-10	8.30981e-09	Distal Intergenic	13	83504034	83667079	163046	-18751	ENSMUSG00000005583	Mef2c
Peak_22025	chr14	108812145	108812489	345	4.39617	3.35728	133.178	1.29781e-10	8.32572e-09	Distal Intergenic	14	108909989	108914239	4251	101750	ENSMUSG00000075478	Slitrk1
Peak_21909	chr14	103947800	103948756	957	2.55107	4.25485	133.117	1.30329e-10	8.35316e-09	Distal Intergenic	14	103977628	104027142	49515	78386	NA	4930432J09Rik
Peak_642	chr1	31051503	31052007	505	-3.16354	3.72118	133.042	1.31011e-10	8.38906e-09	Distal Intergenic	1	30940303	30949755	9453	-101748	ENSMUSG00000026064	Ptp4a1
Peak_45972	chr4	32504283	32504593	311	4.05045	3.10525	132.961	1.31748e-10	8.42844e-09	Promoter (2-3kb)	4	32501503	32503651	2149	2780	ENSMUSG00000040270	Bach2
Peak_41906	chr3	66080598	66081299	702	2.35818	4.10057	132.943	1.31909e-10	8.43097e-09	Intron (uc008pky.3/72789, intron 4 of 5)	3	66053558	66136438	82881	55139	ENSMUSG00000027831	Veph1
Peak_703	chr1	33734410	33734866	457	3.66969	3.16406	132.877	1.32518e-10	8.46019e-09	3' UTR	1	33720419	33742564	22146	13991	ENSMUSG00000004768	Rab23
Peak_37012	chr2	73351583	73352453	871	-2.76385	3.50805	132.867	1.32611e-10	8.46019e-09	3' UTR	2	73362270	73370141	7872	17688	ENSMUSG00000041762	Gpr155
Peak_33819	chr19	24844849	24845638	790	2.33173	4.68327	132.85	1.32761e-10	8.462e-09	Intron (uc008has.1/226041, intron 1 of 10)	19	24678261	24861842	183582	16204	ENSMUSG00000041731	Pgm5
Peak_26456	chr16	42255679	42256157	479	-2.88608	3.36826	132.81	1.33137e-10	8.47812e-09	Intron (uc007zfv.1/14432, intron 2 of 2)	16	42303362	42303469	108	47312	ENSMUSG00000098300	Mir6540
Peak_32578	chr18	71170670	71171309	640	2.84977	3.6455	132.716	1.34008e-10	8.52576e-09	Distal Intergenic	18	70568292	70626131	57840	602378	ENSMUSG00000024513	Mbd2
Peak_49022	chr4	143379985	143380433	449	2.98429	3.49751	132.689	1.34257e-10	8.53375e-09	Distal Intergenic	4	143394441	143399819	5379	-14008	ENSMUSG00000041805	Pramel1
Peak_25049	chr15	95757091	95757671	581	2.6968	3.96588	132.663	1.34502e-10	8.5415e-09	Distal Intergenic	15	95747247	95751591	4345	-5500	NA	Gm6961
Peak_24004	chr15	63532162	63533136	975	-2.13832	4.62207	132.635	1.34764e-10	8.55026e-09	Distal Intergenic	15	63414397	63479608	65212	-52554	NA	Gm20740
Peak_31782	chr18	47374629	47374906	278	3.87182	3.07174	132.599	1.35101e-10	8.56384e-09	Distal Intergenic	18	47275658	47368870	93213	-5759	ENSMUSG00000019647	Sema6a
Peak_24974	chr15	93191141	93192146	1006	2.49488	4.38179	132.579	1.35285e-10	8.56766e-09	Distal Intergenic	15	93239742	93275084	35343	82938	ENSMUSG00000036197	Gxylt1
Peak_14492	chr12	57084458	57084928	471	2.88017	3.97403	132.538	1.35671e-10	8.5842e-09	Intron (uc011ymc.1/217593, intron 2 of 10)	12	56712634	57160643	448010	75715	ENSMUSG00000035472	Slc25a21
Peak_1098	chr1	44591770	44592088	319	3.00701	3.66908	132.481	1.36216e-10	8.61083e-09	Intron (uc007awl.2/70676, intron 1 of 9)	1	44551671	44796836	245166	40099	ENSMUSG00000056870	Gulp1
Peak_41454	chr3	52662222	52663027	806	-2.90558	3.71704	132.446	1.36541e-10	8.62321e-09	Distal Intergenic	3	52739724	52776654	36931	-76697	ENSMUSG00000102785	Gm2447
Peak_9090	chr10	116361823	116362945	1123	1.80671	5.28538	132.434	1.36661e-10	8.62321e-09	Exon (uc007hbv.2/19263, exon 22 of 32)	10	116418121	116421235	3115	-55176	ENSMUSG00000020164	Kcnmb4os1
Peak_38095	chr2	114805441	114806086	646	-3.31784	3.50063	132.369	1.37277e-10	8.6542e-09	Distal Intergenic	2	114642075	114654928	12854	-150513	ENSMUSG00000057147	Dph6
Peak_33095	chr18	88596064	88596456	393	3.25732	3.95885	132.34	1.37555e-10	8.66384e-09	Distal Intergenic	18	88688067	88894207	206141	297751	ENSMUSG00000056153	Socs6
Peak_174	chr1	12410008	12410799	792	-3.05348	4.09203	133.591	1.37758e-10	8.66872e-09	Distal Intergenic	1	12425986	12426106	121	-15187	ENSMUSG00000098555	Mir6341
Peak_62695	chr8	79537245	79537610	366	3.82368	2.92029	132.265	1.38278e-10	8.69357e-09	Distal Intergenic	8	79639676	79677755	38080	-102066	ENSMUSG00000036990	Otud4
Peak_5669	chr10	8800968	8801685	718	1.79446	4.88767	132.144	1.39443e-10	8.75883e-09	Intron (uc007eiu.1/70097, intron 4 of 19)	10	8722219	8886070	163852	84385	ENSMUSG00000015305	Sash1
Peak_51933	chr5	103853998	103854581	584	2.40621	4.30795	132.066	1.40204e-10	8.7941e-09	3' UTR	5	103862050	103911229	49180	56648	ENSMUSG00000029312	Klhl8
Peak_31771	chr18	47301413	47301873	461	-2.54855	3.69524	132.061	1.40258e-10	8.7941e-09	Intron (uc008ewa.2/20358, intron 3 of 18)	18	47245254	47368870	123617	66997	ENSMUSG00000019647	Sema6a
Peak_47050	chr4	73334846	73335806	961	-2.72061	4.73783	142.718	1.41056e-10	8.83608e-09	Distal Intergenic	4	73401032	73405072	4041	69266	ENSMUSG00000066137	Gm11487
Peak_30635	chr18	12200081	12200624	544	2.73586	3.78793	131.841	1.42422e-10	8.91358e-09	Intron (uc008ecb.1/18145, intron 14 of 24)	18	12168730	12189969	21240	31351	ENSMUSG00000024410	3110002H16Rik
Peak_13161	chr12	8940208	8940636	429	3.63381	3.04353	131.816	1.42675e-10	8.92139e-09	Distal Intergenic	12	8947929	8972028	24100	-7293	ENSMUSG00000020583	Matn3
Peak_35313	chr2	20506532	20506925	394	3.25867	3.1539	131.752	1.43315e-10	8.9475e-09	Intron (uc008imk.1/208618, intron 3 of 7)	2	20510047	20810535	300489	-3122	ENSMUSG00000036617	Etl4
Peak_65830	chr9	69844663	69845145	483	-3.26994	3.26378	131.739	1.43443e-10	8.9475e-09	Distal Intergenic	9	69761146	69830199	69054	83517	ENSMUSG00000097623	B230323A14Rik
Peak_9351	chr10	123307126	123307647	522	-3.5922	3.6188	131.735	1.43481e-10	8.9475e-09	Intron (uc007hgu.2/268354, intron 1 of 5)	10	123264076	123741204	477129	43050	ENSMUSG00000044071	Fam19a2
Peak_48336	chr4	119937453	119938499	1047	1.92555	5.05979	131.679	1.44047e-10	8.97475e-09	Intron (uc008una.1/16656, intron 1 of 8)	4	119814678	120135411	320734	122775	ENSMUSG00000028634	Hivep3
Peak_55146	chr6	81466483	81467181	699	-4.16819	4.33851	154.025	1.44516e-10	8.99587e-09	Distal Intergenic	6	81895590	81895663	74	428482	ENSMUSG00000106154	Mir7232
Peak_57220	chr6	146934909	146935228	320	4.88466	2.55922	131.61	1.44747e-10	9.00216e-09	Intron (uc009esm.2/67533, intron 1 of 26)	6	146951301	146954421	3121	19193	ENSMUSG00000040163	1700034J05Rik
Peak_63382	chr8	104352765	104353505	741	2.88976	4.38761	133.678	1.45157e-10	9.01955e-09	3' UTR	8	104340594	104347672	7079	12171	ENSMUSG00000031875	Cmtm3
Peak_11355	chr11	67010182	67010807	626	2.40968	4.11481	131.525	1.45604e-10	9.03922e-09	Distal Intergenic	11	67025154	67035312	10159	-14347	ENSMUSG00000050270	Tmem220
Peak_5890	chr10	14332625	14333714	1090	2.09571	5.26422	137.088	1.45997e-10	9.0555e-09	Distal Intergenic	10	14402585	14545036	142452	211322	ENSMUSG00000039116	Adgrg6
Peak_58460	chr7	65871061	65871791	731	2.19671	4.54928	131.469	1.46181e-10	9.05876e-09	Intron (uc009hgw.2/18553, intron 1 of 20)	7	65862136	66050386	188251	8925	ENSMUSG00000030513	Pcsk6
Peak_63032	chr8	89134964	89135733	770	-3.50674	3.1285	131.447	1.46402e-10	9.06433e-09	Distal Intergenic	8	89027243	89044162	16920	-90802	ENSMUSG00000031665	Sall1
Peak_43750	chr3	122430953	122431425	473	3.17438	3.48604	131.324	1.47669e-10	9.12889e-09	Intron (uc008req.2/29815, intron 2 of 11)	3	122419780	122530182	110403	11173	ENSMUSG00000028121	Bcar3
Peak_16444	chr13	19149557	19150026	470	3.31285	3.76729	131.32	1.47708e-10	9.12889e-09	3' UTR	13	19123734	19150919	27186	25823	ENSMUSG00000021314	Amph
Peak_56897	chr6	137869979	137870612	634	-3.22756	3.91493	132.08	1.48107e-10	9.14537e-09	Distal Intergenic	6	137754577	137837872	83296	115402	ENSMUSG00000030225	Dera
Peak_51571	chr5	90065873	90066646	774	-3.0622	4.78827	151.879	1.48416e-10	9.1563e-09	Distal Intergenic	5	90214725	90223996	9272	157350	ENSMUSG00000035505	Cox18
Peak_26723	chr16	50585852	50586444	593	-3.44817	4.03967	136.82	1.48588e-10	9.15875e-09	Distal Intergenic	16	50590503	50654166	63664	-4059	NA	4930542D17Rik
Peak_19762	chr14	17079549	17080209	661	-3.07508	4.01073	131.289	1.48765e-10	9.16146e-09	Promoter (2-3kb)	14	16430840	17082331	651492	2122	ENSMUSG00000017491	Rarb
Peak_18674	chr13	99100000	99101147	1148	2.01947	5.63883	143.724	1.49249e-10	9.18313e-09	Exon (uc007rpk.1/uc007rpk.1, exon 1 of 2)	13	99076528	99087921	11394	-12079	ENSMUSG00000100410	2310020H05Rik
Peak_14151	chr12	45670513	45672366	1854	1.33804	6.24889	131.121	1.49792e-10	9.20833e-09	Distal Intergenic	12	44852486	45074483	221998	-596030	ENSMUSG00000046314	Stxbp6
Peak_62233	chr8	65736343	65736969	627	2.88441	3.72083	130.986	1.51218e-10	9.28777e-09	Intron (uc009lvj.2/72925, intron 1 of 8)	8	65618525	66471637	853113	117818	ENSMUSG00000036469	2020-03-01
Peak_13736	chr12	32828016	32828644	629	2.82666	3.72812	130.943	1.51675e-10	9.30757e-09	Intron (uc007nif.2/59027, intron 1 of 10)	12	32824116	32826908	2793	3900	NA	Gdap10
Peak_59472	chr7	100653904	100654385	482	3.20601	3.90211	130.88	1.52351e-10	9.34077e-09	Promoter (2-3kb)	7	100643896	100656965	13070	2580	ENSMUSG00000030701	Plekhb1
Peak_56064	chr6	112292456	112293100	645	3.04149	4.11119	130.866	1.525e-10	9.34162e-09	Promoter (2-3kb)	6	112286794	112290319	3526	-2137	NA	5031434C07Rik
Peak_52000	chr5	106577386	106577814	429	-3.37008	3.12735	130.788	1.53333e-10	9.38438e-09	Distal Intergenic	5	106616741	106638328	21588	60514	ENSMUSG00000049606	Zfp644
Peak_58835	chr7	77338431	77339065	635	-2.61428	4.03437	130.456	1.56961e-10	9.59286e-09	Distal Intergenic	7	76411062	76766605	355544	927369	ENSMUSG00000025754	Agbl1
Peak_37971	chr2	110173758	110174421	664	2.07218	4.45395	130.451	1.57017e-10	9.59286e-09	Distal Intergenic	2	110031250	110050479	19230	-123279	ENSMUSG00000086186	Ccdc34os
Peak_3164	chr1	127014894	127015762	869	-3.00548	4.59867	143.192	1.57428e-10	9.6095e-09	Distal Intergenic	1	125913636	126830632	916997	-184262	ENSMUSG00000049690	Nckap5
Peak_7461	chr10	67906158	67906648	491	4.00222	2.89213	130.371	1.57909e-10	9.63039e-09	Intron (uc007fmb.1/216049, intron 2 of 4)	10	67886105	67901337	15233	-4821	ENSMUSG00000037855	Zfp365
Peak_24135	chr15	67245206	67245854	649	-2.30605	4.47138	130.322	1.58455e-10	9.65226e-09	Intron (uc029sre.1/69334, intron 2 of 8)	15	67226769	67377094	150326	18437	ENSMUSG00000102069	1700012I11Rik
Peak_66434	chr9	89948765	89949428	664	2.73313	3.79615	130.313	1.58547e-10	9.65226e-09	Intron (uc009qzt.1/19417, intron 3 of 26)	9	89909775	90026979	117205	38990	ENSMUSG00000032356	Rasgrf1
Peak_49624	chr5	16047351	16048110	760	-2.77662	3.8811	130.252	1.59241e-10	9.68405e-09	Intron (uc008wmx.2/12293, intron 3 of 37)	5	16025749	16268604	242856	21602	ENSMUSG00000040118	Cacna2d1
Peak_52944	chr5	144643902	144644393	492	4.36617	3.36334	130.242	1.59349e-10	9.68405e-09	Distal Intergenic	5	144545887	144557478	11592	98015	ENSMUSG00000059991	Nptx2
Peak_39367	chr2	153425932	153426490	559	2.63839	4.32499	130.147	1.60421e-10	9.74068e-09	Intron (uc008nht.2/329540, intron 2 of 7)	2	153407461	153444479	37019	17989	ENSMUSG00000061411	Nol4l
Peak_13912	chr12	38385909	38386506	598	-3.45987	4.03653	135.581	1.61273e-10	9.78297e-09	Intron (uc007nkj.1/217480, intron 20 of 24)	12	38552809	38614521	61713	228015	ENSMUSG00000112967	4930428E07Rik
Peak_13772	chr12	33340897	33341848	952	1.31532	5.67268	130.061	1.61401e-10	9.78297e-09	Intron (uc007niq.2/380753, intron 2 of 7)	12	33345305	33368277	22973	-3457	ENSMUSG00000020564	Atxn7l1
Peak_32050	chr18	56866147	56866821	675	-3.27937	3.79872	130.016	1.61918e-10	9.80576e-09	Intron (uc008eyv.1/320253, intron 1 of 4)	18	56761716	56925548	163833	58727	ENSMUSG00000032656	2020-03-03
Peak_24978	chr15	93292066	93292400	335	4.02561	2.90041	129.985	1.62264e-10	9.8181e-09	Intron (uc007xir.2/67057, intron 2 of 3)	15	93239742	93275084	35343	-16982	ENSMUSG00000036197	Gxylt1
Peak_55437	chr6	90531704	90532219	516	3.04497	3.56263	129.939	1.62795e-10	9.83622e-09	Distal Intergenic	6	90550818	90599171	48354	-18599	ENSMUSG00000030088	Aldh1l1
Peak_51370	chr5	77743367	77743903	537	-3.23966	3.78047	129.935	1.62848e-10	9.83622e-09	Distal Intergenic	5	77465488	77468857	3370	277879	ENSMUSG00000107232	1700017L05Rik
Peak_67043	chr9	108824721	108825512	792	-2.15451	4.58775	129.832	1.64034e-10	9.89799e-09	Promoter (<=1kb)	9	108826320	108852969	26650	-808	ENSMUSG00000023473	Celsr3
Peak_23932	chr15	59973678	59974169	492	-3.11326	3.26926	129.815	1.6423e-10	9.89799e-09	Distal Intergenic	15	60014866	60016618	1753	42449	ENSMUSG00000071749	4933412E24Rik
Peak_68974	chrX	156990013	156990642	630	-3.20641	3.63051	129.809	1.64299e-10	9.89799e-09	Distal Intergenic	20	157162075	157415286	253212	424644	ENSMUSG00000057457	Phex
Peak_54100	chr6	37294453	37294759	307	4.17866	3.15913	129.738	1.65135e-10	9.93505e-09	Intron (uc009bjb.1/320127, intron 1 of 33)	6	36846022	37299976	453955	5217	ENSMUSG00000038665	Dgki
Peak_54616	chr6	55901947	55902668	722	-3.09226	3.37564	129.732	1.65201e-10	9.93505e-09	Intron (uc009cax.1/232016, intron 9 of 13)	6	55837018	55978598	141581	64929	ENSMUSG00000037973	Ccdc129
Peak_36745	chr2	65285330	65285812	483	2.31462	4.39389	129.678	1.65828e-10	9.95807e-09	Distal Intergenic	2	65150866	65239403	88538	-45927	ENSMUSG00000034903	Cobll1
Peak_40327	chr3	9523460	9524092	633	1.84433	4.67361	129.675	1.65872e-10	9.95807e-09	Intron (uc012cng.1/170753, intron 1 of 9)	3	9427010	9565299	138290	41207	ENSMUSG00000040209	Zfp704
Peak_13098	chr12	5735564	5736019	456	2.61719	3.88744	129.643	1.66248e-10	9.97199e-09	Distal Intergenic	12	5376502	5416132	39631	359062	NA	2810032G03Rik
Peak_57223	chr6	146955607	146956289	683	3.03429	4.13351	129.529	1.67589e-10	1.00437e-08	Promoter (1-2kb)	6	146951301	146954421	3121	-1186	ENSMUSG00000040163	1700034J05Rik
Peak_28797	chr17	43646823	43647400	578	2.86429	3.98638	129.496	1.67986e-10	1.00588e-08	Promoter (2-3kb)	17	43643364	43649709	6346	2309	ENSMUSG00000023912	Slc25a27
Peak_105	chr1	9564235	9564918	684	2.11994	4.7548	129.436	1.68707e-10	1.00932e-08	Intron (uc007agl.2/76187, intron 12 of 13)	1	9548046	9577968	29923	16189	ENSMUSG00000025911	Adhfe1
Peak_13193	chr12	10524192	10524769	578	-2.9833	3.61028	129.413	1.68976e-10	1.01006e-08	Intron (uc033gcq.1/328061, intron 11 of 11)	12	10446388	10531303	84916	77804	ENSMUSG00000112792	Gm38407
Peak_2911	chr1	118480588	118481198	611	-2.94286	3.79757	129.344	1.69805e-10	1.01414e-08	Intron (uc007cid.1/76707, intron 8 of 11)	1	118471772	118545459	73688	8816	ENSMUSG00000064302	Clasp1
Peak_56585	chr6	127404216	127405005	790	-2.15222	4.27927	129.325	1.70032e-10	1.01462e-08	Distal Intergenic	6	127446840	127494239	47400	-41835	ENSMUSG00000037997	Parp11
Peak_61687	chr8	43992920	43993736	817	-3.11047	3.4934	129.297	1.70377e-10	1.0158e-08	Distal Intergenic	8	43673658	43699491	25834	-293429	ENSMUSG00000079058	Gm5347
Peak_65355	chr9	51831487	51832602	1116	3.32935	3.9865	130.163	1.70873e-10	1.01768e-08	Exon (uc009plj.1/244867, exon 9 of 15)	9	51839493	51875885	36393	43283	ENSMUSG00000074354	Arhgap20os
Peak_29407	chr17	64130271	64130991	721	-2.84275	3.98732	129.247	1.70986e-10	1.01768e-08	Intron (uc008dfq.3/14158, intron 16 of 18)	17	64049862	64050672	811	-79599	NA	1110058D11Rik
Peak_44578	chr3	143512578	143513105	528	-2.94252	3.71663	129.191	1.7167e-10	1.02088e-08	Distal Intergenic	3	143670892	143712143	41252	199038	ENSMUSG00000105279	Gm6260
Peak_68010	chrX	60656948	60657632	685	2.80663	3.75299	129.102	1.72751e-10	1.02642e-08	Intron (uc009tie.1/uc009tie.1, intron 8 of 14)	20	60548008	60549216	1209	108940	NA	Gm715
Peak_30405	chr18	4940073	4940628	556	2.72684	4.07384	129.077	1.73063e-10	1.02672e-08	Intron (uc008dym.2/uc008dym.2, intron 1 of 4)	18	4920540	5058312	137773	19533	ENSMUSG00000024236	Svil
Peak_53685	chr6	22429013	22429675	663	2.39494	4.29798	129.062	1.73244e-10	1.02672e-08	Distal Intergenic	6	22306522	22356081	49560	-72932	ENSMUSG00000029672	Fam3c
Peak_46281	chr4	45970829	45971140	312	4.22501	3.38645	129.062	1.73246e-10	1.02672e-08	Promoter (1-2kb)	4	45972297	46034765	62469	-1157	ENSMUSG00000035517	Tdrd7
Peak_29979	chr17	80871076	80871929	854	2.94354	4.05143	128.952	1.74611e-10	1.03393e-08	Distal Intergenic	17	80896793	80927464	30672	-24864	ENSMUSG00000112121	C230072F16Rik
Peak_23911	chr15	59533680	59534152	473	3.32427	3.38757	128.939	1.74765e-10	1.03395e-08	Intron (uc007vxu.2/68501, intron 4 of 4)	15	59648654	59653167	4514	-114502	ENSMUSG00000032501	Trib1
Peak_34496	chr19	48098009	48098580	572	-2.5456	3.6246	128.887	1.75422e-10	1.03695e-08	Distal Intergenic	19	48206025	48805505	599481	-107445	ENSMUSG00000063434	Sorcs3
Peak_2021	chr1	76246095	76246817	723	2.83051	3.82172	128.86	1.75761e-10	1.03807e-08	Distal Intergenic	1	76489133	76502028	12896	-242316	ENSMUSG00000100553	Gm17751
Peak_45861	chr4	28364557	28365131	575	-3.22147	3.27504	128.796	1.76555e-10	1.04187e-08	Distal Intergenic	4	28813131	28873801	60671	-448000	ENSMUSG00000028289	Epha7
Peak_12041	chr11	93608632	93609329	698	3.03648	3.87539	128.777	1.76795e-10	1.0424e-08	Distal Intergenic	11	93859243	93885766	26524	276437	ENSMUSG00000054079	Utp18
Peak_8178	chr10	87927116	87927695	580	-2.28041	4.27536	128.761	1.77001e-10	1.04241e-08	Intron (uc057axe.1/16000, intron 4 of 4)	10	87966671	87968017	1347	-38976	NA	Tyms-ps
Peak_38211	chr2	118445869	118446523	655	-3.2455	3.68655	128.753	1.77099e-10	1.04241e-08	Exon (uc008lrw.2/27103, exon 20 of 39)	2	118438842	118452290	13449	7027	ENSMUSG00000005102	Eif2ak4
Peak_29632	chr17	70131612	70132109	498	3.34793	3.3312	128.728	1.77422e-10	1.04343e-08	Intron (uc008dky.1/224997, intron 2 of 4)	17	69969368	70821413	852046	162244	ENSMUSG00000003279	Dlgap1
Peak_59064	chr7	83921646	83922009	364	-3.83921	2.75567	128.672	1.78124e-10	1.04615e-08	Distal Intergenic	7	83932857	83944342	11486	22333	ENSMUSG00000052353	Cemip
Peak_38710	chr2	134067898	134068459	562	2.01792	4.66244	128.667	1.78187e-10	1.04615e-08	Distal Intergenic	2	134497361	134554352	56992	485893	ENSMUSG00000027261	Hao1
Peak_33935	chr19	28994651	28995246	596	1.95822	4.61978	128.641	1.78527e-10	1.04726e-08	Exon (uc008hcs.2/67072, exon 2 of 5)	19	28990352	29026678	36327	4299	ENSMUSG00000024780	Cdc37l1
Peak_58405	chr7	64360352	64360954	603	3.12619	3.76856	128.619	1.78797e-10	1.04796e-08	Intron (uc012fmp.1/330554, intron 8 of 13)	7	64361492	64373754	12263	12800	ENSMUSG00000033458	Fan1
Peak_40700	chr3	27781932	27782814	883	2.47782	5.22907	144.749	1.79192e-10	1.04938e-08	Distal Intergenic	3	27494432	27711307	216876	-70625	ENSMUSG00000039286	Fndc3b
Peak_11798	chr11	82631338	82631754	417	-3.54331	3.11861	128.544	1.79766e-10	1.05101e-08	Promoter (1-2kb)	11	82633353	82636309	2957	-1599	ENSMUSG00000069796	Gm11426
Peak_63108	chr8	92629086	92629810	725	2.57178	4.17497	128.542	1.79791e-10	1.05101e-08	Distal Intergenic	8	92674289	92680956	6668	-44479	ENSMUSG00000031738	Irx6
Peak_45826	chr4	25593169	25593589	421	3.55603	3.29576	128.531	1.79926e-10	1.05101e-08	Distal Intergenic	4	25609333	25800003	190671	206414	ENSMUSG00000055373	Fut9
Peak_23446	chr15	40730049	40730615	567	2.83017	3.95693	128.513	1.80164e-10	1.05151e-08	Intron (uc007voq.1/22762, intron 1 of 2)	15	40655042	41104592	449551	75007	ENSMUSG00000022306	Zfpm2
Peak_59873	chr7	117514278	117514635	358	4.12682	3.25161	128.441	1.81096e-10	1.05606e-08	Intron (uc009jjl.1/233781, intron 2 of 6)	7	117475492	117549359	73868	38786	ENSMUSG00000030657	Xylt1
Peak_6163	chr10	21962497	21962869	373	3.58574	3.15793	128.421	1.81345e-10	1.05637e-08	Intron (uc007eov.2/20393, intron 2 of 13)	10	21978672	21999902	21231	-15803	ENSMUSG00000019970	Sgk1
Peak_8470	chr10	96730565	96731072	508	3.31345	3.85933	128.413	1.81453e-10	1.05637e-08	Distal Intergenic	10	96617001	96622811	5811	113564	ENSMUSG00000036478	Btg1
Peak_63534	chr8	108895204	108895841	638	3.309	3.52222	128.386	1.81798e-10	1.05748e-08	Intron (uc009nid.1/11906, intron 4 of 9)	8	108936860	108936938	79	-41019	ENSMUSG00000093241	Mir3108
Peak_35021	chr2	11173085	11173714	630	2.4208	4.66251	129.059	1.83081e-10	1.06318e-08	Promoter (<=1kb)	2	11172382	11301226	128845	703	ENSMUSG00000026778	Prkcq
Peak_45621	chr4	17671766	17672152	387	-4.02467	2.84515	128.286	1.83105e-10	1.06318e-08	Distal Intergenic	4	17852893	18118734	265842	-180741	ENSMUSG00000028226	Mmp16
Peak_56387	chr6	121035264	121035831	568	2.8977	3.6625	128.276	1.83237e-10	1.06318e-08	Intron (uc009dnw.2/194401, intron 7 of 31)	6	120997316	121022288	24973	-12976	ENSMUSG00000051586	Mical3
Peak_59887	chr7	117930402	117931000	599	-3.15493	3.17449	128.229	1.83857e-10	1.06588e-08	Distal Intergenic	7	118104376	118116147	11772	185147	ENSMUSG00000008683	Rps15a
Peak_61821	chr8	47634929	47635318	390	3.42895	3.04883	128.202	1.84214e-10	1.06705e-08	Distal Intergenic	8	47667178	47673684	6507	38366	ENSMUSG00000063049	Ing2
Peak_51442	chr5	83592945	83593582	638	-3.31006	3.6235	128.15	1.84902e-10	1.07014e-08	Distal Intergenic	5	83278122	83355195	77074	-237750	ENSMUSG00000049537	Tecrl
Peak_38770	chr2	135759555	135760041	487	2.54204	4.25848	128.081	1.85809e-10	1.07449e-08	Intron (uc008mob.1/18798, intron 2 of 28)	2	135741830	136013068	271239	17725	ENSMUSG00000039943	Plcb4
Peak_13713	chr12	32074227	32074670	444	-3.18832	3.51692	128.066	1.86013e-10	1.07478e-08	Distal Intergenic	12	31958479	32061279	102801	-12948	ENSMUSG00000002997	Prkar2b
Peak_1514	chr1	60667795	60668739	945	1.6369	5.31382	128.047	1.86273e-10	1.07537e-08	Distal Intergenic	1	60746388	60764626	18239	-77649	ENSMUSG00000026012	Cd28
Peak_56908	chr6	138072847	138073380	534	2.78152	4.03569	128.018	1.86659e-10	1.07537e-08	Promoter (<=1kb)	6	137983590	138073196	89607	0	ENSMUSG00000044378	Slc15a5
Peak_44966	chr3	152998885	152999362	478	3.43378	3.57213	128.015	1.86698e-10	1.07537e-08	Distal Intergenic	3	152820710	152982207	161498	-16678	ENSMUSG00000039037	St6galnac5
Peak_26423	chr16	40367222	40367732	511	-4.04449	3.44223	129.809	1.86886e-10	1.07537e-08	Intron (uc007zfq.1/uc007zfq.1, intron 2 of 2)	16	39984371	42176292	2191922	382851	ENSMUSG00000061080	Lsamp
Peak_38081	chr2	114196409	114196812	404	3.61317	3.49601	128	1.86893e-10	1.07537e-08	Exon (uc008lqj.2/228491, exon 2 of 2)	2	114193461	114201432	7972	4620	ENSMUSG00000040321	Zfp770
Peak_69045	chrX	161683467	161683881	415	-4.21448	2.781	127.967	1.87333e-10	1.07701e-08	Distal Intergenic	20	161717036	161779494	62459	-33155	ENSMUSG00000043518	Rai2
Peak_19141	chr13	111363203	111363600	398	-3.24173	3.07051	127.808	1.89481e-10	1.08846e-08	Distal Intergenic	13	111255013	111257749	2737	108190	ENSMUSG00000055194	Actbl2
Peak_42887	chr3	97741348	97741677	330	4.34789	2.95186	127.781	1.89851e-10	1.08894e-08	Exon (uc012cuf.1/83679, exon 24 of 47)	3	97738844	97768014	29171	26337	ENSMUSG00000038170	Pde4dip
Peak_46026	chr4	33780595	33781358	764	-3.22237	3.64264	127.779	1.8988e-10	1.08894e-08	Distal Intergenic	4	33924632	33948831	24200	-143274	ENSMUSG00000044288	Cnr1
Peak_63474	chr8	106704600	106705360	761	1.92546	4.82836	127.75	1.90277e-10	1.09031e-08	Intron (uc009ngk.1/272538, intron 7 of 13)	8	106683068	106851439	168372	21532	ENSMUSG00000041949	Tango6
Peak_63097	chr8	92133824	92134692	869	2.07536	4.72493	127.725	1.90616e-10	1.09135e-08	Distal Intergenic	8	92326031	92356120	30090	221428	ENSMUSG00000031736	Crnde
Peak_42253	chr3	79852699	79853045	347	2.92116	3.46621	127.653	1.91606e-10	1.09611e-08	Distal Intergenic	3	79813153	79842662	29510	-10037	ENSMUSG00000027956	Tmem144
Peak_63007	chr8	88512309	88512962	654	2.8913	4.03252	127.63	1.91924e-10	1.09703e-08	Distal Intergenic	8	88521344	88594887	73544	-8382	ENSMUSG00000031661	Nkd1
Peak_46522	chr4	54533804	54534476	673	1.9652	4.93419	127.6	1.92339e-10	1.09829e-08	Distal Intergenic	4	54947945	55083563	135619	-413469	ENSMUSG00000060206	Zfp462
Peak_23985	chr15	62462698	62463138	441	-2.48347	4.4628	127.658	1.92463e-10	1.09829e-08	Distal Intergenic	15	62217541	62219451	1911	-243247	NA	H2afy3
Peak_23774	chr15	56382822	56383243	422	3.5147	3.53531	127.473	1.94104e-10	1.10675e-08	Distal Intergenic	15	56689944	56694460	4517	-306701	ENSMUSG00000086541	Has2os
Peak_32396	chr18	65722605	65723143	539	3.16285	3.59157	127.358	1.95712e-10	1.115e-08	Exon (uc008ffg.1/319888, exon 5 of 15)	18	65698268	65751537	53270	24337	ENSMUSG00000046610	Oacyl
Peak_42103	chr3	72119566	72120057	492	-3.48778	3.34405	127.313	1.96355e-10	1.11774e-08	Distal Intergenic	3	72888560	72966866	78307	846809	ENSMUSG00000027790	Sis
Peak_65308	chr9	50305981	50306492	512	2.62369	3.93553	127.246	1.97303e-10	1.12221e-08	Distal Intergenic	9	50232523	50233182	660	-72799	ENSMUSG00000110916	2310003N18Rik
Peak_7435	chr10	67226030	67226600	571	2.80657	4.11539	127.14	1.98812e-10	1.12987e-08	Exon (uc011xfo.1/108829, exon 10 of 10)	10	67215263	67218469	3207	10767	ENSMUSG00000037876	Jmjd1c
Peak_17237	chr13	43289134	43289486	353	4.39953	3.1299	127.099	1.99405e-10	1.1323e-08	Intron (uc007qfx.1/328232, intron 1 of 1)	13	43195519	43304172	108654	14686	ENSMUSG00000051335	Gfod1
Peak_60295	chr7	132373529	132374326	798	3.64264	4.32131	140.178	2.00974e-10	1.14028e-08	Distal Intergenic	7	132236255	132317155	80901	-56374	ENSMUSG00000030930	Chst15
Peak_61630	chr8	41083498	41084027	530	3.603	3.52186	126.881	2.02568e-10	1.14806e-08	Promoter (<=1kb)	8	40990912	41084908	93997	881	ENSMUSG00000045636	Mtus1
Peak_64077	chr8	127254389	127255021	633	3.58997	4.47614	142.7	2.02677e-10	1.14806e-08	Intron (uc009nzf.2/93742, intron 2 of 15)	8	127299612	127402059	102448	-44591	ENSMUSG00000025812	Pard3
Peak_3940	chr1	152165032	152166015	984	2.52064	5.18152	142.937	2.04062e-10	1.15496e-08	Distal Intergenic	1	151884524	152090320	205797	-74712	ENSMUSG00000032666	1700025G04Rik
Peak_68074	chrX	70465813	70466352	540	3.08774	4.08084	127.637	2.04394e-10	1.15512e-08	Intron (uc009tji.1/236848, intron 3 of 5)	20	70460056	70477043	16988	10691	ENSMUSG00000073139	Tmem185a
Peak_68724	chrX	136755490	136755878	389	4.63193	3.38137	129.027	2.04531e-10	1.15512e-08	Intron (uc009uiy.2/436230, intron 2 of 9)	20	136732948	136743686	10739	-11804	ENSMUSG00000031422	Morf4l2
Peak_43022	chr3	101551412	101552025	614	2.73437	4.32138	126.743	2.04591e-10	1.15512e-08	Distal Intergenic	3	101576219	101604707	28489	52682	ENSMUSG00000033161	Atp1a1
Peak_66516	chr9	92882350	92883007	658	2.90544	3.98278	126.638	2.06148e-10	1.16207e-08	Distal Intergenic	9	92979916	93005733	25818	122726	ENSMUSG00000100294	1700034K08Rik
Peak_48492	chr4	125544909	125545912	1004	-2.15144	4.69007	126.637	2.06157e-10	1.16207e-08	Intron (uc008usa.2/14807, intron 1 of 15)	4	125504749	125504857	109	40160	ENSMUSG00000094403	Mir692-2
Peak_31238	chr18	33154105	33155082	978	-2.6845	4.11661	126.625	2.06346e-10	1.16219e-08	Intron (uc008ejq.2/12326, intron 5 of 10)	18	33201421	33213816	12396	58734	ENSMUSG00000024378	Stard4
Peak_5719	chr10	9889225	9889762	538	3.11529	3.58165	126.598	2.06751e-10	1.16352e-08	Intron (uc007eiz.2/78808, intron 2 of 25)	10	9755547	9901040	145494	11278	ENSMUSG00000019790	Stxbp5
Peak_31805	chr18	47942245	47942714	470	3.29249	3.58321	126.563	2.07264e-10	1.16546e-08	Intron (uc008ewf.1/414127, intron 2 of 3)	18	47922841	48107980	185140	19404	NA	G630055G22Rik
Peak_28105	chr17	12498378	12498736	359	3.99361	2.96311	126.55	2.07463e-10	1.16563e-08	Intron (uc008aku.1/20519, intron 1 of 10)	17	12419974	12507704	87731	8968	ENSMUSG00000023828	Slc22a3
Peak_42057	chr3	69494446	69495056	611	-3.52642	3.77003	129.566	2.07828e-10	1.16608e-08	Intron (uc008pmg.1/242083, intron 1 of 3)	3	69573919	69598960	25042	103904	ENSMUSG00000043300	B3galnt1
Peak_17332	chr13	46871923	46872552	630	2.76196	4.26114	126.522	2.0789e-10	1.16608e-08	Intron (uc007qhn.1/16553, intron 2 of 37)	13	46749088	46929718	180631	57166	ENSMUSG00000021375	Kif13a
Peak_30934	chr18	22632666	22633367	702	2.8062	3.75223	126.511	2.08048e-10	1.16608e-08	Distal Intergenic	18	22693155	22770942	77788	137575	ENSMUSG00000041923	Nol4
Peak_31126	chr18	28901093	28901958	866	-3.37613	4.64828	147.379	2.08815e-10	1.16943e-08	Intron (uc029tmb.1/320624, intron 3 of 4)	18	28872216	28938016	65801	28877	NA	4930474G06Rik
Peak_35406	chr2	22985852	22986568	717	2.25771	4.40421	126.393	2.09831e-10	1.17417e-08	Intron (uc008ins.2/11308, intron 2 of 10)	2	22939989	22971259	31271	-14593	ENSMUSG00000058835	Abi1
Peak_41222	chr3	41590716	41591297	582	2.84006	3.75225	126.248	2.12055e-10	1.18566e-08	Intron (uc008pcj.2/269424, intron 3 of 10)	3	41564880	41616864	51985	25836	ENSMUSG00000025764	Jade1
Peak_55950	chr6	107789816	107790456	641	2.92802	3.8839	126.231	2.12316e-10	1.18604e-08	Distal Intergenic	6	107529726	107570228	40503	260090	ENSMUSG00000034648	Lrrn1
Peak_65718	chr9	64956369	64956744	376	3.36941	3.32645	126.221	2.12466e-10	1.18604e-08	Distal Intergenic	9	64960832	64973493	12662	-4088	ENSMUSG00000034263	Ints14
Peak_62770	chr8	81451845	81452593	749	1.81704	4.92329	126.194	2.12894e-10	1.18693e-08	Intron (uc009mje.2/234515, intron 1 of 24)	8	81342562	82127917	785356	109283	ENSMUSG00000037940	Inpp4b
Peak_27076	chr16	66867384	66867901	518	-3.81725	2.84863	126.189	2.12968e-10	1.18693e-08	Intron (uc007zqn.2/239857, intron 3 of 9)	16	66657118	66664626	7509	210266	ENSMUSG00000092599	1700010K23Rik
Peak_27599	chr16	88499491	88499831	341	-3.48153	2.83883	126.164	2.13349e-10	1.18809e-08	Distal Intergenic	16	88505807	88506978	1172	7147	ENSMUSG00000055811	Cldn17
Peak_32095	chr18	58146967	58147660	694	2.92567	3.98726	126.084	2.14588e-10	1.19404e-08	Intron (uc008ezn.1/14119, intron 7 of 64)	18	58008623	58209926	201304	62266	ENSMUSG00000024598	Fbn2
Peak_27876	chr16	97322468	97323023	556	3.00614	3.8113	125.91	2.17319e-10	1.20826e-08	Distal Intergenic	16	97356728	97439012	82285	-33705	ENSMUSG00000040605	Bace2
Peak_21973	chr14	105588063	105589202	1140	1.34412	6.12476	125.863	2.18074e-10	1.21148e-08	Promoter (<=1kb)	14	105589549	105593929	4381	-347	NA	9330188P03Rik
Peak_57202	chr6	146468941	146469582	642	3.26344	3.29867	125.823	2.187e-10	1.21398e-08	Intron (uc009erw.2/16439, intron 2 of 56)	6	146108299	146502223	393925	32641	ENSMUSG00000030287	Itpr2
Peak_65303	chr9	50118671	50119055	385	4.1071	2.87254	125.812	2.18883e-10	1.21403e-08	Distal Intergenic	9	50232523	50233182	660	114127	ENSMUSG00000110916	2310003N18Rik
Peak_50846	chr5	58025774	58026137	364	2.99045	3.22209	125.783	2.1934e-10	1.21559e-08	Intron (uc008xlu.3/54216, intron 2 of 2)	5	57718081	58133235	415155	307693	ENSMUSG00000029108	Pcdh7
Peak_20105	chr14	32260809	32261152	344	4.39624	3.12153	125.769	2.19567e-10	1.21588e-08	Intron (uc007syq.1/26430, intron 12 of 16)	14	32201971	32297549	95579	58838	ENSMUSG00000021911	Parg
Peak_36798	chr2	66184454	66184742	289	2.81777	3.39561	125.715	2.20426e-10	1.21965e-08	3' UTR	2	66197792	66201623	3832	16881	ENSMUSG00000034848	Ttc21b
Peak_60216	chr7	128572008	128572435	428	3.63289	3.3129	125.65	2.21473e-10	1.22389e-08	Distal Intergenic	7	128611365	128696436	85072	-38930	ENSMUSG00000042105	Inpp5f
Peak_17935	chr13	73439132	73439620	489	3.0626	3.46746	125.646	2.21544e-10	1.22389e-08	Distal Intergenic	13	73467383	73514538	47156	-27763	ENSMUSG00000021608	Lpcat1
Peak_19531	chr14	7888682	7889837	1156	1.46338	5.84237	125.625	2.21868e-10	1.2247e-08	Exon (uc007sek.1/286940, exon 10 of 46)	14	7817957	7951587	133631	70725	ENSMUSG00000025278	Flnb
Peak_49471	chr5	8629857	8630426	570	-3.64091	3.52935	126.225	2.22672e-10	1.22776e-08	Distal Intergenic	5	8490336	8622952	132617	-6905	ENSMUSG00000040570	Rundc3b
Peak_4245	chr1	160534697	160535380	684	-2.53563	4.05298	125.569	2.22778e-10	1.22776e-08	Intron (uc007dej.2/29809, intron 13 of 20)	1	160576668	160577753	1086	42373	NA	Gpr52
Peak_5231	chr1	186665476	186665799	324	3.89773	2.78082	125.522	2.23555e-10	1.23023e-08	Intron (uc007dzo.2/21808, intron 1 of 6)	1	186623186	186705992	82807	40193	ENSMUSG00000039239	Tgfb2
Peak_46777	chr4	63205457	63206194	738	3.64979	4.69989	146.988	2.23581e-10	1.23023e-08	Distal Intergenic	4	63215412	63275020	59609	-9218	ENSMUSG00000045672	Col27a1
Peak_1346	chr1	55659578	55660451	874	-2.19707	4.66056	125.43	2.25055e-10	1.23736e-08	Intron (uc007ban.2/227120, intron 1 of 5)	1	55405946	55754285	348340	253632	ENSMUSG00000038349	Plcl1
Peak_47681	chr4	97465921	97466503	583	3.12102	3.75816	125.397	2.25589e-10	1.23931e-08	Distal Intergenic	4	97581943	98118876	536934	-115440	ENSMUSG00000028565	Nfia
Peak_26494	chr16	43407572	43408367	796	-2.32943	4.13225	125.3	2.27192e-10	1.24713e-08	Intron (uc007zga.3/56490, intron 4 of 10)	16	43410518	43420196	9679	11829	ENSMUSG00000085499	Gm15713
Peak_51630	chr5	91909136	91909554	419	-3.08795	3.34793	125.241	2.28181e-10	1.25156e-08	Distal Intergenic	5	91962389	91966598	4210	-52835	ENSMUSG00000102644	Thap6
Peak_32254	chr18	61952654	61953189	536	2.7664	4.16078	125.185	2.29118e-10	1.25567e-08	Promoter (<=1kb)	18	61953075	61971224	18150	0	ENSMUSG00000045629	Sh3tc2
Peak_53886	chr6	29696936	29697174	239	4.35069	2.83482	125.174	2.29293e-10	1.25567e-08	Promoter (2-3kb)	6	29694214	29718558	24345	2722	ENSMUSG00000001763	Tspan33
Peak_34584	chr19	53284508	53285108	601	-2.60156	3.79247	125.088	2.30736e-10	1.26257e-08	Distal Intergenic	19	53310506	53375810	65305	-25398	ENSMUSG00000025025	Mxi1
Peak_17595	chr13	57516078	57516428	351	4.08355	3.07842	125.014	2.31997e-10	1.26847e-08	Intron (uc007qtc.2/20745, intron 5 of 9)	13	57421195	57908332	487138	391904	ENSMUSG00000056222	Spock1
Peak_18690	chr13	99458740	99459402	663	-2.29342	3.95838	124.987	2.32444e-10	1.26991e-08	Intron (uc007rpr.2/17755, intron 2 of 6)	13	99429212	99444467	15256	-14273	ENSMUSG00000052727	Map1b
Peak_39154	chr2	147193595	147194392	798	2.16734	4.63139	124.937	2.33307e-10	1.27362e-08	Intron (uc012cfm.1/100313531, intron 1 of 5)	2	147187424	147188482	1059	6171	ENSMUSG00000053545	6430503K07Rik
Peak_63505	chr8	107522294	107522846	553	2.83944	4.07051	124.877	2.34327e-10	1.27793e-08	Intron (uc009nhv.1/66894, intron 8 of 23)	8	107545012	107558595	13584	-22166	ENSMUSG00000031930	Wwp2
Peak_40043	chr2	178307361	178307607	247	3.35148	3.12636	124.869	2.34465e-10	1.27793e-08	Intron (uc008ohj.2/74189, intron 8 of 12)	2	178345296	178375044	29749	67437	ENSMUSG00000060445	Sycp2
Peak_4287	chr1	161718260	161718780	521	3.02689	3.51698	124.823	2.35252e-10	1.28121e-08	Distal Intergenic	1	161780692	161788495	7804	69715	ENSMUSG00000000817	Fasl
Peak_64846	chr9	32691481	32691822	342	-3.41373	3.43787	124.788	2.35869e-10	1.28356e-08	Intron (uc009osa.1/23871, intron 3 of 3)	9	32696042	32757820	61779	-4220	ENSMUSG00000032035	Ets1
Peak_31714	chr18	46066927	46067437	511	-3.07894	3.78113	124.768	2.36211e-10	1.28441e-08	Distal Intergenic	18	45683487	46045260	361774	-21667	NA	A330093E20Rik
Peak_59659	chr7	109967979	109968711	733	2.56302	4.59075	127.87	2.37575e-10	1.29013e-08	Distal Intergenic	7	109893781	109960470	66690	-7509	ENSMUSG00000035901	Dennd5a
Peak_52609	chr5	131677463	131677943	481	2.94847	3.82765	124.686	2.37635e-10	1.29013e-08	Intron (uc008zuv.1/319974, intron 5 of 19)	5	131437682	131538687	101006	-138776	ENSMUSG00000029673	Auts2
Peak_8993	chr10	112418092	112418713	622	-3.04068	3.65781	124.62	2.38793e-10	1.29539e-08	Intron (uc007hao.1/268345, intron 2 of 4)	10	112455608	112465874	10267	-36895	ENSMUSG00000035681	Kcnc2
Peak_26855	chr16	57225470	57225982	513	2.94624	3.43244	124.558	2.3987e-10	1.30022e-08	Intron (uc007znb.1/67581, intron 1 of 17)	16	57168864	57231466	62603	5484	ENSMUSG00000022749	Tbc1d23
Peak_26519	chr16	43954191	43954510	320	3.79337	3.17296	124.538	2.40227e-10	1.30113e-08	Intron (uc007zgo.2/212153, intron 12 of 15)	16	43969146	43979077	9932	24567	ENSMUSG00000036304	Zdhhc23
Peak_8514	chr10	98258092	98258676	585	-3.12369	3.52312	124.504	2.4082e-10	1.30333e-08	Distal Intergenic	10	98299927	98351867	51941	93191	ENSMUSG00000112896	Gm8633
Peak_41409	chr3	51749711	51750404	694	2.05219	4.50962	124.472	2.41389e-10	1.30539e-08	Intron (uc008pee.2/433586, intron 1 of 3)	3	51687613	51796535	108923	46131	ENSMUSG00000061143	Maml3
Peak_11348	chr11	66694763	66695334	572	-3.29196	3.46435	124.315	2.44185e-10	1.31948e-08	Distal Intergenic	11	66211725	66526126	314402	-168637	ENSMUSG00000053930	Shisa6
Peak_53365	chr6	9790325	9791005	681	2.87115	3.8405	124.29	2.44639e-10	1.3209e-08	Distal Intergenic	6	8950019	9248578	298560	840306	ENSMUSG00000046178	Nxph1
Peak_31239	chr18	33200500	33201005	506	3.12911	3.43353	124.218	2.45947e-10	1.32693e-08	Downstream (<1kb)	18	33201421	33213816	12396	12811	ENSMUSG00000024378	Stard4
Peak_26731	chr16	50709890	50710344	455	3.34486	3.04257	124.095	2.48177e-10	1.33792e-08	Distal Intergenic	16	50727132	50727245	114	-16788	ENSMUSG00000098482	Mir6363
Peak_19903	chr14	21969016	21969440	425	3.09981	3.26532	123.938	2.5106e-10	1.35103e-08	Distal Intergenic	14	21983962	21989601	5640	20161	ENSMUSG00000039081	Zfp503
Peak_8808	chr10	108061900	108062522	623	-3.37502	4.37441	138.126	2.51132e-10	1.35103e-08	Distal Intergenic	10	108162400	108277575	115176	-99878	ENSMUSG00000019907	Ppp1r12a
Peak_66520	chr9	93008124	93008997	874	-2.67159	4.15071	123.931	2.51195e-10	1.35103e-08	Promoter (2-3kb)	9	92979916	93005733	25818	-2391	ENSMUSG00000100294	1700034K08Rik
Peak_59983	chr7	121012001	121012528	528	3.38408	3.64412	123.916	2.51465e-10	1.35116e-08	Intron (uc009jnj.1/74466, intron 7 of 7)	7	121034445	121076835	42391	-21917	ENSMUSG00000030876	Mettl9
Peak_67152	chr9	113038584	113038858	275	3.78698	2.72519	123.908	2.5161e-10	1.35116e-08	Distal Intergenic	9	113496746	113587152	90407	548294	ENSMUSG00000109890	AU023762
Peak_66544	chr9	94455895	94456615	721	-2.4058	4.25947	123.801	2.53601e-10	1.36079e-08	Distal Intergenic	9	94517864	94538081	20218	81466	ENSMUSG00000045414	1190002N15Rik
Peak_8589	chr10	99900963	99901475	513	-3.04649	3.58566	123.774	2.54106e-10	1.36233e-08	Distal Intergenic	10	100015824	100100412	84589	-114349	ENSMUSG00000019966	Kitl
Peak_7730	chr10	77229424	77229977	554	3.87453	3.4826	123.765	2.54281e-10	1.36233e-08	Distal Intergenic	10	77257773	77259223	1451	29246	ENSMUSG00000078444	Gm10941
Peak_61622	chr8	40974454	40974893	440	-3.55906	2.98255	123.741	2.54736e-10	1.36371e-08	Intron (uc009lni.2/68797, intron 2 of 5)	8	40990912	41015495	24584	40602	ENSMUSG00000045636	Mtus1
Peak_46624	chr4	57373870	57374341	472	3.78656	3.45959	123.604	2.57331e-10	1.37654e-08	Distal Intergenic	4	57359792	57364292	4501	-9578	NA	1700042G15Rik
Peak_64891	chr9	34977815	34978168	354	3.72849	3.08387	123.587	2.5764e-10	1.37713e-08	Intron (uc009osg.1/67703, intron 4 of 13)	9	34911784	34993237	81454	66031	ENSMUSG00000032036	Kirrel3
Peak_67454	chr9	123473351	123473992	642	3.11637	3.45617	123.558	2.58204e-10	1.37908e-08	Distal Intergenic	9	123478701	123517649	38949	-4709	ENSMUSG00000025239	Limd1
Peak_58412	chr7	64553679	64554134	456	3.63104	2.85893	123.533	2.58675e-10	1.38005e-08	5' UTR	7	64502138	64753876	251739	51541	ENSMUSG00000030519	Apba2
Peak_27675	chr16	90550045	90550927	883	2.95851	4.23649	124.702	2.58783e-10	1.38005e-08	Distal Intergenic	16	90386397	90499553	113157	163648	ENSMUSG00000053414	Hunk
Peak_67486	chrX	7289080	7289489	410	3.91498	2.94295	123.517	2.58985e-10	1.38006e-08	Intron (uc029xhv.1/12728, intron 2 of 13)	20	7158412	7319358	160947	29869	ENSMUSG00000004317	Clcn5
Peak_45908	chr4	31513563	31513933	371	-3.9561	3.18857	123.496	2.59381e-10	1.3811e-08	Distal Intergenic	4	31964107	31982948	18842	-450174	ENSMUSG00000028284	Map3k7
Peak_59330	chr7	96761014	96761570	557	-2.70569	3.53953	123.467	2.59941e-10	1.38226e-08	Intron (uc009iiq.2/23966, intron 13 of 32)	7	96796641	96798570	1930	-35071	ENSMUSG00000048078	Tenm4
Peak_61383	chr8	32821704	32822234	531	3.11949	3.89951	123.464	2.59998e-10	1.38226e-08	Distal Intergenic	8	32888505	32950026	61522	127792	NA	Gm3985
Peak_62935	chr8	85478009	85478684	676	2.91981	3.58177	123.416	2.60919e-10	1.38609e-08	Distal Intergenic	8	85492617	85524834	32218	-13933	ENSMUSG00000031700	Gpt2
Peak_54111	chr6	37392135	37392813	679	2.96129	4.11666	123.426	2.61234e-10	1.3867e-08	Intron (uc009bjf.2/208647, intron 1 of 11)	6	37331021	37442148	111128	49335	ENSMUSG00000038648	Creb3l2
Peak_64397	chr9	15897920	15898572	653	-3.19057	4.07394	128.46	2.61629e-10	1.38774e-08	Distal Intergenic	9	15862377	15874556	12180	-23364	ENSMUSG00000050901	Mtnr1b
Peak_31768	chr18	47269741	47270335	595	2.66223	4.0243	123.35	2.62201e-10	1.38971e-08	Intron (uc008ewa.2/20358, intron 18 of 18)	18	47245254	47368870	123617	98535	ENSMUSG00000019647	Sema6a
Peak_3215	chr1	128400323	128400900	578	-3.0982	3.17807	123.31	2.62968e-10	1.3927e-08	Intron (uc007clp.2/226414, intron 4 of 15)	1	128363707	128417416	53710	16516	ENSMUSG00000026356	Dars
Peak_44673	chr3	145537875	145538250	376	4.38629	3.59053	128.354	2.63559e-10	1.39476e-08	Intron (uc008rqm.2/71355, intron 56 of 59)	3	145544973	145552011	7039	-6723	ENSMUSG00000028197	Col24a1
Peak_30421	chr18	5197676	5198321	646	-2.65614	3.8855	123.216	2.64811e-10	1.39938e-08	Distal Intergenic	18	5114281	5119293	5013	83395	ENSMUSG00000024236	Svil
Peak_28755	chr17	42303057	42303479	423	-3.21437	2.9599	123.208	2.64976e-10	1.39938e-08	Distal Intergenic	17	42315947	42317462	1516	-12468	ENSMUSG00000042256	Ptchd4
Peak_51376	chr5	77837724	77839073	1350	1.8463	5.37833	126.328	2.65036e-10	1.39938e-08	Distal Intergenic	5	77465488	77468857	3370	372236	ENSMUSG00000107232	1700017L05Rik
Peak_36028	chr2	44218249	44218767	519	2.53433	3.87588	123.185	2.65426e-10	1.40036e-08	Intron (uc008jow.1/76117, intron 11 of 13)	2	44059238	44065324	6087	-152925	ENSMUSG00000085089	Arhgap15os
Peak_20394	chr14	46999482	47000091	610	-3.07619	3.2684	123.133	2.66455e-10	1.40472e-08	Promoter (1-2kb)	14	47001340	47105817	104478	-1249	ENSMUSG00000021838	Samd4
Peak_63581	chr8	110794649	110795019	371	4.20357	2.70601	123.105	2.67008e-10	1.40657e-08	Intron (uc009nkz.3/76527, intron 1 of 7)	8	110741829	110805924	64096	10905	ENSMUSG00000031750	Il34
Peak_60083	chr7	124990690	124991169	480	-2.66992	3.55639	123.042	2.68259e-10	1.41208e-08	Distal Intergenic	7	124625670	124708935	83266	-281755	ENSMUSG00000086254	3100003L05Rik
Peak_65765	chr9	66101530	66101975	446	3.8554	3.27748	122.994	2.69202e-10	1.41512e-08	Intron (uc009qek.1/56440, intron 4 of 14)	9	66088127	66124886	36760	22911	ENSMUSG00000032382	Snx1
Peak_15521	chr12	99949958	99950300	343	4.10272	2.61815	122.992	2.69245e-10	1.41512e-08	Intron (uc007osg.2/104884, intron 15 of 15)	12	99964499	100062682	98184	-14199	ENSMUSG00000045404	Kcnk13
Peak_6944	chr10	49790381	49790712	332	2.79378	3.76907	122.955	2.69989e-10	1.41795e-08	Promoter (1-2kb)	10	49495438	49788754	293317	-1627	ENSMUSG00000056073	Grik2
Peak_34846	chr2	4904763	4905153	391	3.95274	3.04051	122.864	2.71817e-10	1.42571e-08	Intron (uc008ifb.1/109079, intron 7 of 8)	2	4918996	4938743	19748	-13843	ENSMUSG00000026664	Phyh
Peak_22660	chr15	11297960	11298398	439	-3.37387	3.16477	122.861	2.71878e-10	1.42571e-08	Intron (uc007vhb.1/239337, intron 17 of 23)	15	11383663	11399658	15996	101260	ENSMUSG00000022241	Tars
Peak_63929	chr8	123097709	123098142	434	3.92592	3.4621	122.806	2.7299e-10	1.43046e-08	3' UTR	8	123102350	123105242	2893	-4208	ENSMUSG00000000740	Rpl13
Peak_51620	chr5	91586181	91586678	498	2.8127	3.7882	122.763	2.73866e-10	1.43396e-08	Intron (uc008ybw.1/231440, intron 1 of 3)	5	91517700	91623996	106297	68481	ENSMUSG00000034981	Parm1
Peak_6141	chr10	21543654	21544243	590	-3.31972	3.6503	122.746	2.74207e-10	1.43466e-08	Distal Intergenic	10	21593145	21622375	29231	-48902	ENSMUSG00000050844	1700020N01Rik
Peak_41705	chr3	60527588	60528971	1384	1.09141	6.21423	122.692	2.75318e-10	1.43846e-08	Promoter (<=1kb)	3	60528756	60619047	90292	0	ENSMUSG00000027763	Mbnl1
Peak_49595	chr5	14833240	14833873	634	2.41334	3.91366	122.69	2.75347e-10	1.43846e-08	Intron (uc008wmi.2/26875, intron 22 of 24)	5	14910124	14914889	4766	81016	ENSMUSG00000033219	Gm9758
Peak_19157	chr13	111867800	111868537	738	2.55133	4.73384	128.319	2.76599e-10	1.4439e-08	Promoter (<=1kb)	13	111867936	111871937	4002	0	ENSMUSG00000086111	Gm15326
Peak_38073	chr2	113959088	113959662	575	-2.77145	3.47541	122.604	2.77125e-10	1.44556e-08	Distal Intergenic	2	114013565	114061502	47938	-53903	ENSMUSG00000092397	C130080G10Rik
Peak_35946	chr2	39146632	39147050	419	-4.12211	2.44191	122.59	2.77413e-10	1.44597e-08	Intron (uc008jof.1/320271, intron 2 of 17)	2	39157486	39162235	4750	15185	ENSMUSG00000082315	Gm16523
Peak_7016	chr10	52791478	52791980	503	2.73308	3.79895	122.574	2.77742e-10	1.4466e-08	Intron (uc007fbk.2/215085, intron 1 of 7)	10	52690501	53111622	421122	100977	ENSMUSG00000038602	Slc35f1
Peak_20092	chr14	31664492	31664978	487	2.72294	4.15224	122.55	2.78237e-10	1.44713e-08	Intron (uc007sxy.2/26363, intron 2 of 3)	14	31641057	31668197	27141	23435	ENSMUSG00000021900	Btd
Peak_26650	chr16	48720248	48720716	469	-3.45546	3.14318	122.549	2.78262e-10	1.44713e-08	Distal Intergenic	16	48734690	48771956	37267	51240	ENSMUSG00000030775	Trat1
Peak_8901	chr10	110658167	110658630	464	-3.97377	2.99568	122.521	2.78828e-10	1.44899e-08	Distal Intergenic	10	110600650	110615961	15312	57517	ENSMUSG00000112398	9230102K24Rik
Peak_37479	chr2	93091631	93092041	411	-3.765	3.02941	122.466	2.79982e-10	1.45389e-08	Distal Intergenic	2	92974906	93046144	71239	-45487	ENSMUSG00000075028	Prdm11
Peak_29400	chr17	64045167	64045760	594	2.3352	3.96084	122.424	2.80857e-10	1.45734e-08	Intron (uc008dfq.3/14158, intron 15 of 18)	17	64049862	64050672	811	4912	NA	1110058D11Rik
Peak_2444	chr1	90009138	90009618	481	-3.25167	3.00386	122.405	2.81256e-10	1.45832e-08	Intron (uc007bzd.1/208372, intron 1 of 5)	1	89952678	90014577	61900	4959	ENSMUSG00000067081	Asb18
Peak_9268	chr10	121394208	121394878	671	3.39117	3.80252	122.366	2.82076e-10	1.46148e-08	Intron (uc007hfo.1/75612, intron 13 of 13)	10	121383115	121397245	14131	11093	ENSMUSG00000034707	Gns
Peak_63985	chr8	124772374	124773005	632	3.44036	3.6343	122.317	2.831e-10	1.46466e-08	Distal Intergenic	8	124793019	124834704	41686	-20014	ENSMUSG00000036913	Trim67
Peak_34953	chr2	7778417	7779232	816	-2.54265	3.52816	122.316	2.83113e-10	1.46466e-08	Distal Intergenic	2	6539699	7396198	856500	-382219	ENSMUSG00000002107	Celf2
Peak_66034	chr9	77442870	77443257	388	3.18887	3.53604	122.296	2.83546e-10	1.4658e-08	Intron (uc009qtj.2/214345, intron 10 of 13)	9	77366412	77399416	33005	-43454	ENSMUSG00000099170	5730403I07Rik
Peak_17837	chr13	69770937	69771580	644	-3.41837	3.47231	122.271	2.84081e-10	1.4665e-08	Distal Intergenic	13	69702832	69739897	37066	-31040	ENSMUSG00000052981	Ube2ql1
Peak_52002	chr5	106711772	106712472	701	-2.70584	3.43011	122.269	2.84117e-10	1.4665e-08	Distal Intergenic	5	106636417	106696830	60414	-14942	ENSMUSG00000049606	Zfp644
Peak_40784	chr3	29957450	29958220	771	-2.7797	3.52675	122.26	2.84317e-10	1.4665e-08	Exon (uc008oun.2/14013, exon 12 of 13)	3	29951296	29997748	46453	39528	ENSMUSG00000027684	Mecom
Peak_40961	chr3	34504010	34504624	615	-2.92344	3.76603	122.22	2.85159e-10	1.46887e-08	Distal Intergenic	3	34560381	34677993	117613	-55757	ENSMUSG00000105265	Sox2ot
Peak_38834	chr2	137432401	137433630	1230	1.66292	5.65722	124.894	2.85202e-10	1.46887e-08	Distal Intergenic	2	137081451	137116520	35070	-315881	ENSMUSG00000027276	Jag1
Peak_27788	chr16	93807861	93808542	682	2.8632	3.68273	122.201	2.85552e-10	1.46959e-08	Exon (uc007zzv.1/70028, exon 35 of 37)	16	93832121	93845354	13234	-23579	ENSMUSG00000039456	Morc3
Peak_37240	chr2	80660252	80660786	535	3.26673	3.30315	122.129	2.87108e-10	1.47649e-08	Distal Intergenic	2	80639264	80660071	20808	20988	ENSMUSG00000026999	Nup35
Peak_47003	chr4	70810379	70811361	983	-2.18878	4.60777	121.994	2.9001e-10	1.49031e-08	Distal Intergenic	4	70431927	70534928	103002	-275451	ENSMUSG00000039270	Megf9
Peak_51526	chr5	88829847	88830220	374	-3.36127	2.86298	121.969	2.90552e-10	1.49199e-08	Distal Intergenic	5	88887260	89239656	352397	-57040	ENSMUSG00000060961	Slc4a4
Peak_20200	chr14	35004548	35005023	476	-3.00345	3.37186	121.908	2.91883e-10	1.49771e-08	Intron (uc007tbj.1/14803, intron 3 of 15)	14	34894609	34894706	98	109939	ENSMUSG00000065481	Mir346
Peak_39569	chr2	159080839	159081771	933	2.4551	4.65201	124.947	2.92592e-10	1.49933e-08	Distal Intergenic	2	158794807	158858220	63414	286032	ENSMUSG00000027655	Dhx35
Peak_18943	chr13	107064987	107065821	835	-3.35592	3.93809	126.859	2.92632e-10	1.49933e-08	Intron (uc007rui.1/uc007rui.1, intron 1 of 3)	13	107032776	107055497	22722	32211	ENSMUSG00000071181	3830408C21Rik
Peak_4821	chr1	174548447	174548757	311	3.1662	3.51015	121.862	2.9288e-10	1.49949e-08	Intron (uc007dtd.2/54418, intron 2 of 17)	1	174501825	174822729	320905	46622	ENSMUSG00000028354	Fmn2
Peak_41914	chr3	66240494	66240880	387	3.20864	3.39142	121.796	2.9432e-10	1.50575e-08	Intron (uc008pkz.3/72789, intron 4 of 13)	3	66219887	66225806	5920	20607	ENSMUSG00000027832	Ptx3
Peak_14986	chr12	78987653	78988097	445	-3.11581	3.7501	121.634	2.97916e-10	1.52303e-08	Intron (uc007nzp.2/268567, intron 1 of 2)	12	78961795	78983478	21684	-4175	ENSMUSG00000046157	Tmem229b
Peak_55879	chr6	104605093	104605496	404	2.9681	3.43622	121.603	2.98612e-10	1.52546e-08	Intron (uc009dco.1/53870, intron 2 of 22)	6	104493044	104863405	370362	112049	ENSMUSG00000030092	Cntn6
Peak_26010	chr16	27243788	27244385	598	-3.32183	3.76454	122.72	2.99283e-10	1.52733e-08	Distal Intergenic	16	27307641	27351209	43569	-63256	ENSMUSG00000052276	Ostn
Peak_34162	chr19	36878570	36879294	725	-3.26396	3.31484	121.567	2.9942e-10	1.52733e-08	Exon (uc008hhu.2/74493, exon 19 of 27)	19	36917550	36919599	2050	40305	ENSMUSG00000047632	Fgfbp3
Peak_58228	chr7	54734809	54735250	442	3.27299	3.37742	121.53	3.00248e-10	1.53037e-08	Distal Intergenic	7	54835245	55250089	414845	-99995	ENSMUSG00000063297	Luzp2
Peak_65862	chr9	71579125	71579686	562	3.0787	3.99226	121.514	3.00611e-10	1.53037e-08	Exon (uc009qpa.1/102371, exon 2 of 13)	9	71504347	71592360	88014	12674	ENSMUSG00000041361	Myzap
Peak_41908	chr3	66101868	66102566	699	-2.1268	4.24455	121.511	3.0068e-10	1.53037e-08	Intron (uc008pky.3/72789, intron 3 of 5)	3	66053558	66136438	82881	33872	ENSMUSG00000027831	Veph1
Peak_3660	chr1	138424226	138424622	397	3.22059	3.28448	121.495	3.01048e-10	1.53112e-08	Distal Intergenic	1	138273738	138289462	15725	150488	ENSMUSG00000026394	Atp6v1g3
Peak_55874	chr6	104443487	104444167	681	-3.27322	3.93861	125.378	3.01823e-10	1.53394e-08	Distal Intergenic	6	104493044	104863405	370362	-48877	ENSMUSG00000030092	Cntn6
Peak_8317	chr10	93130205	93130778	574	-3.14609	3.25136	121.377	3.03715e-10	1.54242e-08	Distal Intergenic	10	93160876	93225368	64493	-30098	ENSMUSG00000020015	Cdk17
Peak_59318	chr7	96511976	96512653	678	-2.40508	3.7642	121.331	3.04761e-10	1.54639e-08	Intron (uc009iiq.2/23966, intron 4 of 32)	7	96643999	96732280	88282	-131346	ENSMUSG00000048078	Tenm4
Peak_32340	chr18	64618212	64618634	423	3.19624	3.18676	121.323	3.04945e-10	1.54639e-08	Intron (uc008fem.1/54670, intron 1 of 27)	18	64528979	64661000	132022	42366	ENSMUSG00000039529	Atp8b1
Peak_2517	chr1	92737669	92738288	620	-2.60021	4.11316	121.251	3.06607e-10	1.55369e-08	Distal Intergenic	1	92644218	92648841	4624	-88828	ENSMUSG00000044055	Otos
Peak_36152	chr2	49412542	49413236	695	4.29881	4.39217	141.965	3.07225e-10	1.55568e-08	Distal Intergenic	2	49451486	49551609	100124	-38250	ENSMUSG00000069495	Epc2
Peak_29720	chr17	72561474	72562039	566	-3.21065	3.57636	121.201	3.07756e-10	1.55723e-08	Intron (uc008dnb.1/11682, intron 1 of 28)	17	71868988	72604307	735320	42268	ENSMUSG00000055471	Alk
Peak_9377	chr10	125121694	125122793	1100	2.423	4.26748	121.138	3.09205e-10	1.56341e-08	Distal Intergenic	10	125227485	125308873	81389	186080	ENSMUSG00000020102	Slc16a7
Peak_37677	chr2	102240168	102240613	446	-2.51069	3.48922	121.124	3.09545e-10	1.56399e-08	Distal Intergenic	2	102111544	102186460	74917	-53708	ENSMUSG00000048058	Ldlrad3
Peak_5477	chr1	194742785	194743285	501	2.78089	3.91039	121.101	3.10066e-10	1.56548e-08	Intron (uc007een.1/18845, intron 4 of 31)	1	194804710	194816868	12159	-61425	ENSMUSG00000026640	Plxna2
Peak_11115	chr11	57701298	57702328	1031	3.48945	4.27286	131.562	3.11583e-10	1.57199e-08	Intron (uc007jaa.1/171212, intron 1 of 2)	11	57645442	57787500	142059	55856	ENSMUSG00000020520	Galnt10
Peak_46592	chr4	56850745	56851254	510	3.07141	3.28968	121.003	3.1237e-10	1.5745e-08	Intron (uc008sxu.2/54366, intron 1 of 18)	4	56824058	56838700	14643	-12045	ENSMUSG00000038816	Ctnnal1
Peak_36855	chr2	68515426	68516088	663	-3.01736	3.43166	120.996	3.12535e-10	1.5745e-08	Distal Intergenic	2	68262791	68471981	209191	-43445	ENSMUSG00000027030	Stk39
Peak_159	chr1	11458325	11458782	458	-2.65105	3.74712	120.697	3.19645e-10	1.60915e-08	Intron (uc011wii.1/320492, intron 1 of 6)	1	11414105	11975902	561798	44220	ENSMUSG00000057715	A830018L16Rik
Peak_32053	chr18	56945645	56946173	529	-3.50221	3.11002	120.606	3.21837e-10	1.61901e-08	Distal Intergenic	18	56936260	56940518	4259	9385	NA	Gm10536
Peak_50413	chr5	42844813	42845263	451	2.89599	3.51902	120.567	3.22804e-10	1.62241e-08	Distal Intergenic	5	43233463	43237919	4457	-388200	ENSMUSG00000039782	Cpeb2
Peak_2976	chr1	120115212	120116220	1009	1.44381	5.85088	120.559	3.22982e-10	1.62241e-08	Intron (uc007cje.1/13167, intron 3 of 3)	1	120113280	120120919	7640	4699	ENSMUSG00000026385	Dbi
Peak_19601	chr14	10795455	10796098	644	-2.78843	4.02642	120.465	3.25301e-10	1.63287e-08	Intron (uc007sfk.2/14198, intron 2 of 8)	14	10738553	10779001	40449	56902	ENSMUSG00000089833	Fhitos
Peak_20350	chr14	45580984	45581835	852	2.72566	4.14252	120.426	3.26249e-10	1.63645e-08	Distal Intergenic	14	45543710	45562876	19167	37274	NA	4930527F14Rik
Peak_27909	chr17	3442411	3443487	1077	-2.02037	4.64121	120.387	3.27223e-10	1.64015e-08	Intron (uc008aeo.1/24001, intron 9 of 26)	17	3482315	3519397	37083	-38828	ENSMUSG00000023800	Tiam2
Peak_7610	chr10	73296286	73296905	620	-2.84613	3.27886	120.339	3.28401e-10	1.64388e-08	Intron (uc007fpc.1/uc007fpc.1, intron 1 of 1)	10	73099342	74317264	1217923	196944	ENSMUSG00000052613	Pcdh15
Peak_9249	chr10	120899992	120900329	338	-3.42275	2.86128	120.337	3.28443e-10	1.64388e-08	Promoter (1-2kb)	10	120781101	120898971	117871	-1021	ENSMUSG00000051236	Msrb3
Peak_17734	chr13	63701300	63701873	574	2.597	3.53631	120.291	3.29598e-10	1.64847e-08	Intron (uc007qxz.2/75522, intron 4 of 4)	13	63675756	63734298	58543	32425	ENSMUSG00000113825	1700024I08Rik
Peak_42258	chr3	79903673	79904782	1110	2.52634	4.79384	127.625	3.29924e-10	1.64891e-08	Intron (uc008pny.2/68659, intron 1 of 3)	3	79885930	79946278	60349	17743	ENSMUSG00000027955	Fam198b
Peak_56862	chr6	137276236	137276604	369	4.97439	3.22651	124.128	3.3043e-10	1.65024e-08	Intron (uc009emu.2/19277, intron 1 of 2)	6	137252299	137464633	212335	23937	ENSMUSG00000030223	Ptpro
Peak_45314	chr4	8374095	8374492	398	3.07843	3.7672	120.19	3.32119e-10	1.65748e-08	Distal Intergenic	4	8141493	8239041	97549	-135054	ENSMUSG00000041261	Car8
Peak_7373	chr10	64076083	64076917	835	2.16597	4.28023	120.164	3.32781e-10	1.65959e-08	Intron (uc007fkh.2/216033, intron 7 of 17)	10	63928497	64090255	161759	13338	ENSMUSG00000042846	Lrrtm3
Peak_62788	chr8	82079278	82079795	518	-2.67407	3.81407	120.107	3.34209e-10	1.66551e-08	Intron (uc009mjf.2/234515, intron 24 of 24)	8	81856368	82122570	266203	222910	ENSMUSG00000037940	Inpp4b
Peak_14049	chr12	42032598	42032953	356	2.96265	3.28623	120.09	3.34646e-10	1.66633e-08	Distal Intergenic	12	41451668	41486057	34390	-546541	ENSMUSG00000036295	Lrrn3
Peak_8259	chr10	90835296	90835662	367	3.94551	2.75068	120.082	3.34854e-10	1.66633e-08	Intron (uc033frv.1/77531, intron 17 of 24)	10	90829843	90923602	93760	5453	ENSMUSG00000058589	Anks1b
Peak_13058	chr12	4690882	4691612	731	2.63238	3.83402	120.066	3.35262e-10	1.66716e-08	Intron (uc007mxw.2/20403, intron 29 of 39)	12	4711518	4713952	2435	-19906	ENSMUSG00000020640	Itsn2
Peak_13949	chr12	39587126	39587832	707	2.47092	4.56286	120.973	3.3591e-10	1.66918e-08	Distal Intergenic	12	40005447	40037376	31930	449544	ENSMUSG00000047446	Arl4a
Peak_8244	chr10	90563274	90563658	385	-3.91428	2.83678	119.968	3.37763e-10	1.67718e-08	Intron (uc033frv.1/77531, intron 14 of 24)	10	90575727	90972984	397258	-12069	ENSMUSG00000058589	Anks1b
Peak_48821	chr4	137266582	137267102	521	4.44992	2.63018	119.916	3.39092e-10	1.68258e-08	Distal Intergenic	4	137277635	137299501	21867	-10533	ENSMUSG00000036856	Wnt4
Peak_46093	chr4	36098396	36098858	463	-4.00393	2.77635	119.756	3.43238e-10	1.70193e-08	Intron (uc008sha.2/242384, intron 6 of 8)	4	35706648	35845204	138557	-253192	ENSMUSG00000045083	Lingo2
Peak_46090	chr4	35885575	35886485	911	-2.22808	4.15485	119.674	3.45358e-10	1.71122e-08	Intron (uc008sha.2/242384, intron 8 of 8)	4	35706648	35845204	138557	-40371	ENSMUSG00000045083	Lingo2
Peak_28174	chr17	15311947	15312247	301	-4.21668	2.37266	119.622	3.46732e-10	1.71679e-08	Distal Intergenic	17	15350813	15354461	3649	42214	NA	Gm10510
Peak_55884	chr6	104879707	104880057	351	-3.70669	3.17925	119.499	3.49982e-10	1.73165e-08	Distal Intergenic	6	104493044	104863405	370362	386663	ENSMUSG00000030092	Cntn6
Peak_46752	chr4	62663190	62663706	517	2.44417	3.9118	119.483	3.5043e-10	1.73228e-08	Intron (uc012dfu.1/50780, intron 10 of 15)	4	62673974	62703019	29046	-10268	ENSMUSG00000059810	Rgs3
Peak_26747	chr16	51457102	51457567	466	-3.39565	3.39148	119.476	3.50611e-10	1.73228e-08	Distal Intergenic	16	52031549	52050905	19357	-573982	ENSMUSG00000022637	Cblb
Peak_55666	chr6	98083624	98084040	417	3.88188	2.99001	119.423	3.52007e-10	1.73766e-08	Distal Intergenic	6	97991783	98021358	29576	91841	ENSMUSG00000035158	Mitf
Peak_40669	chr3	27204161	27204633	473	2.85616	3.58694	119.416	3.52201e-10	1.73766e-08	Intron (uc008otl.1/320024, intron 1 of 4)	3	27183004	27284608	101605	21157	ENSMUSG00000027698	Nceh1
Peak_39200	chr2	148478193	148478769	577	2.42199	4.60099	120.411	3.54692e-10	1.74751e-08	Distal Intergenic	2	148436651	148443535	6885	-34658	ENSMUSG00000027435	Cd93
Peak_32593	chr18	72015991	72016482	492	-3.96717	2.97623	119.323	3.54702e-10	1.74751e-08	Intron (uc008fop.1/13176, intron 1 of 28)	18	71253632	72351069	1097438	334587	ENSMUSG00000060534	Dcc
Peak_32133	chr18	59352191	59352722	532	3.37755	3.90458	122.277	3.55213e-10	1.74878e-08	Intron (uc008ezw.1/78923, intron 2 of 2)	18	59175340	59411336	235997	176851	ENSMUSG00000058152	Chsy3
Peak_31664	chr18	44573341	44573961	621	2.51713	4.4441	119.272	3.56083e-10	1.75182e-08	Intron (uc008euy.1/328949, intron 1 of 16)	18	44661665	44676271	14607	-87704	ENSMUSG00000097610	A930012L18Rik
Peak_60078	chr7	124704363	124704857	495	-3.60858	2.88648	119.236	3.57071e-10	1.75543e-08	Intron (uc029woi.1/73076, intron 1 of 3)	7	124625670	124708935	83266	4078	ENSMUSG00000086254	3100003L05Rik
Peak_52620	chr5	132169907	132170504	598	-3.30402	3.23511	119.192	3.58275e-10	1.7601e-08	Intron (uc008zuv.1/319974, intron 2 of 19)	5	131880269	131883768	3500	289638	ENSMUSG00000105773	4930563F08Rik
Peak_711	chr1	33912532	33912733	202	3.67413	3.14317	119.154	3.59297e-10	1.76387e-08	Intron (uc007aon.2/13518, intron 2 of 102)	1	33908225	34308662	400438	4307	ENSMUSG00000026131	Dst
Peak_50522	chr5	45595555	45596200	646	-2.5607	4.16451	119.067	3.61693e-10	1.77437e-08	Intron (uc008xja.2/58227, intron 1 of 15)	5	45639275	45644091	4817	-43075	ENSMUSG00000097825	9630001P10Rik
Peak_49827	chr5	23165737	23166543	807	1.90143	4.73099	119.032	3.62666e-10	1.77789e-08	Intron (uc008wpv.2/269629, intron 2 of 2)	5	23431808	23434353	2546	267810	ENSMUSG00000073147	5031425E22Rik
Peak_19672	chr14	13041467	13042191	725	-3.11827	3.78701	118.965	3.64525e-10	1.78573e-08	Distal Intergenic	14	12372563	12823079	450517	-218388	ENSMUSG00000054423	Cadps
Peak_68287	chrX	93409168	93410126	959	-3.01561	3.94074	119.748	3.69461e-10	1.80824e-08	Intron (uc009tss.2/18968, intron 35 of 36)	20	93286507	93298355	11849	122661	ENSMUSG00000035277	Arx
Peak_45578	chr4	15246910	15247418	509	3.18183	3.21835	118.782	3.69641e-10	1.80824e-08	Distal Intergenic	4	15265820	15286753	20934	-18402	ENSMUSG00000043252	Tmem64
Peak_23715	chr15	54882922	54883375	454	-3.53067	3.42095	118.762	3.70214e-10	1.80874e-08	Exon (uc007vro.4/18606, exon 10 of 25)	15	54838901	54920146	81246	36771	ENSMUSG00000022425	Enpp2
Peak_64655	chr9	26383918	26384334	417	-2.99381	3.29169	118.753	3.70464e-10	1.80874e-08	Distal Intergenic	9	26733808	26756094	22287	-349474	ENSMUSG00000045994	B3gat1
Peak_63203	chr8	95037052	95037811	760	-2.20101	3.93749	118.751	3.70527e-10	1.80874e-08	Promoter (2-3kb)	8	95034720	95045249	10530	2332	ENSMUSG00000060470	Adgrg3
Peak_16857	chr13	30185662	30186916	1255	1.86518	4.88711	118.711	3.71654e-10	1.81296e-08	Intron (uc007pyt.1/218121, intron 1 of 12)	13	30136490	30246694	110205	49172	ENSMUSG00000038732	Mboat1
Peak_57068	chr6	142754635	142755021	387	4.01093	4.21254	134.668	3.77533e-10	1.84034e-08	Promoter (1-2kb)	6	142756686	142775714	19029	-1665	ENSMUSG00000030282	Cmas
Peak_10091	chr11	21161753	21162049	297	3.66489	3.09328	118.422	3.79965e-10	1.85089e-08	Distal Intergenic	11	21135469	21150327	14859	26284	ENSMUSG00000020134	Peli1
Peak_44636	chr3	144519652	144520430	779	3.38303	4.61698	137.236	3.81283e-10	1.85601e-08	Intron (uc012cyx.1/23908, intron 1 of 6)	3	144431107	144570216	139110	49786	ENSMUSG00000040151	Hs2st1
Peak_6640	chr10	39227511	39228757	1247	-2.04912	4.3354	118.335	3.82514e-10	1.86069e-08	Distal Intergenic	10	39150971	39163794	12824	-63717	ENSMUSG00000062074	Wisp3
Peak_10473	chr11	34276402	34277310	909	-1.53277	5.21147	118.29	3.83831e-10	1.86578e-08	Intron (uc029rle.2/94176, intron 11 of 29)	11	34314822	34422640	107819	-37512	ENSMUSG00000069911	Fam196b
Peak_4211	chr1	159614033	159614580	548	2.99134	3.76703	118.275	3.84279e-10	1.86665e-08	Intron (uc007dea.2/21960, intron 1 of 22)	1	159523769	159924922	401154	90264	ENSMUSG00000015829	Tnr
Peak_14581	chr12	64229431	64230117	687	-2.30798	3.91415	118.265	3.84572e-10	1.86676e-08	Distal Intergenic	12	64471333	64474898	3566	244781	ENSMUSG00000043060	Fscb
Peak_2571	chr1	94503373	94504362	990	-2.31212	4.69741	121.757	3.84899e-10	1.86704e-08	Distal Intergenic	1	94797442	94802472	5031	-293080	ENSMUSG00000100518	4930440C22Rik
Peak_36340	chr2	53053391	53054235	845	2.25525	4.39813	118.189	3.86827e-10	1.87382e-08	Intron (uc008jrh.1/71409, intron 5 of 26)	2	53108252	53134202	25951	-54017	ENSMUSG00000036053	Fmnl2
Peak_45671	chr4	20343082	20344028	947	1.86569	5.95761	134.283	3.86838e-10	1.87382e-08	Intron (uc008scl.1/269513, intron 3 of 5)	4	20042052	20066111	24060	301030	ENSMUSG00000073987	Ggh
Peak_29520	chr17	66868271	66868690	420	2.98702	3.58466	118.128	3.88648e-10	1.88127e-08	Intron (uc008dka.2/19274, intron 14 of 30)	17	66813882	66944442	130561	75752	ENSMUSG00000033278	Ptprm
Peak_26902	chr16	58616888	58618132	1245	3.4073	4.66591	136.956	3.90351e-10	1.88766e-08	Promoter (<=1kb)	16	58613686	58616978	3293	0	ENSMUSG00000075002	Gm813
Peak_67558	chrX	10474803	10475409	607	3.95628	3.34883	118.065	3.90513e-10	1.88766e-08	Distal Intergenic	20	10485116	10596602	111487	-9707	ENSMUSG00000058254	Tspan7
Peak_7747	chr10	77634622	77635195	574	3.26901	2.98751	118.047	3.91062e-10	1.88899e-08	Exon (uc011xhg.1/22213, exon 4 of 5)	10	77641224	77641307	84	-6029	ENSMUSG00000089424	Mir1930
Peak_30376	chr18	4129529	4129959	431	2.77225	3.33415	117.943	3.94214e-10	1.90068e-08	Distal Intergenic	18	4165832	4182236	16405	-35873	ENSMUSG00000024233	Lyzl1
Peak_22309	chr14	120507407	120508190	784	1.8102	4.80751	117.941	3.9427e-10	1.90068e-08	Distal Intergenic	14	120478461	120507192	28732	28946	ENSMUSG00000051615	Rap2a
Peak_12633	chr11	112506672	112507361	690	3.22504	3.75861	117.94	3.94305e-10	1.90068e-08	Distal Intergenic	11	112687643	112711341	23699	203980	ENSMUSG00000041674	BC006965
Peak_50943	chr5	64702938	64703524	587	1.97724	4.63485	117.916	3.95024e-10	1.90282e-08	Distal Intergenic	5	64593863	64610699	16837	-92239	ENSMUSG00000105402	Gm3716
Peak_54652	chr6	56813200	56813592	393	-3.11636	3.37546	117.807	3.98336e-10	1.91654e-08	Distal Intergenic	6	56777525	56797813	20289	-15387	ENSMUSG00000059486	Kbtbd2
Peak_59870	chr7	117494781	117495323	543	2.74499	3.95178	117.804	3.98426e-10	1.91654e-08	Intron (uc009jjl.1/233781, intron 2 of 6)	7	117475492	117549359	73868	19289	ENSMUSG00000030657	Xylt1
Peak_6108	chr10	20935103	20935572	470	-3.32071	3.26703	117.743	4.00326e-10	1.92434e-08	Distal Intergenic	10	20952547	20966021	13475	-16975	ENSMUSG00000019986	Ahi1
Peak_64259	chr9	10231994	10232549	556	-2.80992	3.89856	117.667	4.02662e-10	1.93423e-08	Intron (uc009odr.2/244682, intron 3 of 20)	9	9894431	9894521	91	337563	ENSMUSG00000098408	Mir6237
Peak_680	chr1	33042197	33043119	923	1.89577	4.42484	117.599	4.04784e-10	1.94307e-08	Distal Intergenic	1	32543546	32547293	3748	-494904	ENSMUSG00000091318	Gm5415
Peak_34467	chr19	47414122	47414786	665	2.99015	3.90662	117.589	4.05078e-10	1.94314e-08	Intron (uc008huz.2/14218, intron 2 of 14)	19	47260174	47464411	204238	49625	ENSMUSG00000053617	Sh3pxd2a
Peak_61354	chr8	31901311	31902025	715	-2.79484	3.8414	117.572	4.05619e-10	1.94439e-08	Intron (uc009ljo.1/211323, intron 1 of 8)	8	31818028	31918203	100176	16178	ENSMUSG00000062991	Nrg1
Peak_58411	chr7	64537283	64537747	465	3.46325	2.94289	117.549	4.06347e-10	1.94653e-08	Intron (uc009hgj.2/11784, intron 1 of 14)	7	64502138	64753876	251739	35145	ENSMUSG00000030519	Apba2
Peak_16830	chr13	29565457	29566136	680	-2.3665	4.52036	118.57	4.07611e-10	1.95124e-08	Intron (uc057bcz.1/68916, intron 9 of 16)	13	29191746	29855673	663928	289537	ENSMUSG00000006191	Cdkal1
Peak_38665	chr2	132736950	132737396	447	2.99463	3.84766	117.463	4.09035e-10	1.9567e-08	Intron (uc008mne.2/73747, intron 2 of 2)	2	132781278	132795072	13795	-43882	ENSMUSG00000027350	Chgb
Peak_51886	chr5	102365240	102365545	306	3.66537	3.04413	117.432	4.10019e-10	1.96005e-08	Intron (uc008yiu.1/231532, intron 1 of 2)	5	102481391	102897937	416547	-115846	ENSMUSG00000057315	Arhgap24
Peak_7113	chr10	56611850	56612563	714	2.28379	4.22744	117.377	4.11784e-10	1.96713e-08	Distal Intergenic	10	56379088	56390419	11332	232762	ENSMUSG00000050953	Gja1
Peak_27745	chr16	92196799	92197452	654	-3.42394	3.19613	117.324	4.13462e-10	1.97378e-08	Distal Intergenic	16	92292389	92298133	5745	-94937	ENSMUSG00000039672	Kcne2
Peak_21960	chr14	105370700	105371070	371	-3.51187	2.63916	117.281	4.14844e-10	1.97901e-08	Distal Intergenic	14	105427559	105437716	10158	-56489	NA	5430440P10Rik
Peak_48136	chr4	111635478	111636079	602	-4.06489	3.60555	123.481	4.16698e-10	1.98579e-08	Intron (uc008udc.2/78933, intron 11 of 12)	4	111720010	111807054	87045	-83931	ENSMUSG00000034401	Spata6
Peak_13006	chr12	3248111	3248410	300	4.05869	2.85167	117.219	4.16839e-10	1.98579e-08	3' UTR	12	3236611	3249997	13387	11500	ENSMUSG00000079179	Rab10os
Peak_67701	chrX	22999049	22999415	367	3.75053	3.04562	117.196	4.17558e-10	1.98785e-08	Distal Intergenic	20	23219271	23266802	47532	267387	ENSMUSG00000036782	Klhl13
Peak_45056	chr3	155260023	155260318	296	3.7202	2.65764	117.17	4.18408e-10	1.99053e-08	Distal Intergenic	3	155093434	155194278	100845	166589	ENSMUSG00000028182	Lrriq3
Peak_41972	chr3	67918600	67919141	542	1.98482	4.36294	117.115	4.20196e-10	1.99766e-08	Intron (uc008plq.1/208426, intron 1 of 3)	3	67892220	68056593	164374	26380	ENSMUSG00000051777	Iqcj
Peak_47306	chr4	84307058	84307687	630	-3.56536	4.16417	130.022	4.20505e-10	1.99776e-08	Intron (uc008tlg.2/242509, intron 4 of 5)	4	84272542	84546405	273864	238718	ENSMUSG00000028487	Bnc2
Peak_8170	chr10	87666014	87666792	779	-2.68072	4.09521	117.085	4.21183e-10	1.99846e-08	Distal Intergenic	10	87521795	87584137	62343	144219	ENSMUSG00000020051	Pah
Peak_53387	chr6	12085908	12086319	412	3.49402	3.24413	117.083	4.21229e-10	1.99846e-08	Distal Intergenic	6	12099521	12109580	10060	23261	ENSMUSG00000057223	Gm6578
Peak_59867	chr7	117461985	117463146	1162	1.76001	5.52661	121.725	4.2262e-10	2.00368e-08	Intron (uc009jjl.1/233781, intron 1 of 6)	7	117475492	117549359	73868	-12346	ENSMUSG00000030657	Xylt1
Peak_59541	chr7	102399258	102399734	477	3.26336	3.45532	116.991	4.24246e-10	2.00966e-08	Intron (uc009irm.1/20866, intron 3 of 11)	7	102427082	102428810	1729	-27348	ENSMUSG00000030987	Stim1
Peak_33694	chr19	21784384	21784835	452	-2.42633	4.07111	116.984	4.24461e-10	2.00966e-08	Intron (uc008gzd.2/83921, intron 1 of 3)	19	21778340	21858360	80021	6044	ENSMUSG00000024754	Tmem2
Peak_62661	chr8	78696732	78697187	456	-3.6429	3.2512	116.962	4.25186e-10	2.01171e-08	Exon (uc012ggh.2/76775, exon 8 of 11)	8	78804868	78821152	16285	123965	ENSMUSG00000031683	Lsm6
Peak_3473	chr1	134213393	134213837	445	3.62927	3.26843	116.907	4.27004e-10	2.01893e-08	Intron (uc056yea.1/11539, intron 1 of 1)	1	134193448	134201232	7785	19945	ENSMUSG00000042451	Mybph
Peak_21793	chr14	100584026	100584642	617	3.24721	3.19254	116.819	4.29922e-10	2.03135e-08	Distal Intergenic	14	99870640	100149795	279156	-434231	ENSMUSG00000072294	Klf12
Peak_44225	chr3	134260962	134261421	460	2.99649	3.20039	116.81	4.30248e-10	2.0315e-08	3' UTR	3	134240505	134240583	79	-20379	ENSMUSG00000084564	Mir1895
Peak_27500	chr16	85127996	85129084	1089	1.93675	5.03731	117.157	4.31923e-10	2.0372e-08	Intron (uc007ztm.2/11820, intron 1 of 15)	16	84954436	85173707	219272	44623	ENSMUSG00000022892	App
Peak_61864	chr8	48458295	48458901	607	1.66325	5.17923	116.756	4.32043e-10	2.0372e-08	Intron (uc009lrr.2/23965, intron 2 of 26)	8	48334753	48555232	220480	96331	ENSMUSG00000031561	Tenm3
Peak_68275	chrX	92790247	92790828	582	-2.83453	3.6395	116.695	4.34084e-10	2.04543e-08	Distal Intergenic	20	92118879	92599572	480694	-190675	ENSMUSG00000067649	Mageb18
Peak_38192	chr2	117685780	117686374	595	2.66721	4.02774	116.663	4.35163e-10	2.04911e-08	Distal Intergenic	2	117804649	117812802	8154	126428	NA	Gm13985
Peak_6485	chr10	31477816	31478152	337	3.02296	3.36889	116.643	4.35832e-10	2.05018e-08	Distal Intergenic	10	31332380	31445921	113542	-31895	ENSMUSG00000000296	Tpd52l1
Peak_41641	chr3	58356204	58356501	298	3.8455	2.67343	116.639	4.35981e-10	2.05018e-08	Distal Intergenic	3	58415689	58466787	51099	-59188	ENSMUSG00000027806	Tsc22d2
Peak_59325	chr7	96672468	96672940	473	-2.53709	3.86536	116.57	4.38327e-10	2.05981e-08	Intron (uc009iiq.2/23966, intron 7 of 32)	7	96643999	96732280	88282	28469	ENSMUSG00000048078	Tenm4
Peak_66279	chr9	85676881	85677463	583	3.13375	3.41636	116.542	4.3929e-10	2.06294e-08	Distal Intergenic	9	85687360	85721346	33987	43883	ENSMUSG00000035941	Ibtk
Peak_45079	chr3	156472641	156473150	510	2.77538	3.47936	116.529	4.3973e-10	2.0636e-08	Distal Intergenic	3	156546753	156561746	14994	88596	ENSMUSG00000085084	4930570G19Rik
Peak_28197	chr17	16176880	16177508	629	2.69201	4.07397	116.509	4.40402e-10	2.06535e-08	Distal Intergenic	17	15819345	15826586	7242	-350294	ENSMUSG00000048027	Rgmb
Peak_61925	chr8	51502479	51502952	474	-2.55275	3.47133	116.448	4.42499e-10	2.07378e-08	Distal Intergenic	8	50368112	50416089	47978	1134367	ENSMUSG00000110281	Gm2516
Peak_43436	chr3	113796430	113796915	486	3.09168	3.27274	116.42	4.43469e-10	2.07692e-08	Distal Intergenic	3	113627078	113630149	3072	-166281	ENSMUSG00000027981	Rnpc3
Peak_66866	chr9	103696867	103697430	564	2.81795	3.51508	116.388	4.44581e-10	2.08072e-08	Intron (uc009rgy.2/81907, intron 2 of 5)	9	103482936	103692807	209872	-4060	ENSMUSG00000042757	Tmem108
Peak_41253	chr3	42790325	42790784	460	2.83518	3.58847	116.347	4.45984e-10	2.08473e-08	Distal Intergenic	3	41744684	41758939	14256	1045641	ENSMUSG00000025766	D3Ertd751e
Peak_23253	chr15	35513610	35514078	469	2.78364	3.72937	116.339	4.46257e-10	2.08473e-08	Intron (uc011zsa.1/666173, intron 17 of 28)	15	35371546	35931229	559684	142064	ENSMUSG00000037646	Vps13b
Peak_34057	chr19	32606464	32606754	291	3.47996	3.1004	116.336	4.46374e-10	2.08473e-08	Intron (uc008hfl.2/23972, intron 1 of 11)	19	32595715	32667187	71473	10749	ENSMUSG00000024899	Papss2
Peak_44649	chr3	144644076	144644587	512	3.32086	3.2733	116.328	4.46643e-10	2.08473e-08	Distal Intergenic	3	144683678	144696954	13277	52367	ENSMUSG00000037062	Sh3glb1
Peak_18482	chr13	93488540	93488988	449	3.28351	3.5399	116.265	4.48843e-10	2.09359e-08	Intron (uc007rlf.2/57748, intron 1 of 10)	13	93430097	93499808	69712	10820	ENSMUSG00000021690	Jmy
Peak_12018	chr11	90894213	90894883	671	-3.47999	3.70783	119.901	4.49725e-10	2.09629e-08	Exon (uc007kxd.1/73922, exon 3 of 3)	11	90883320	90895152	11833	10893	ENSMUSG00000085940	4930405D11Rik
Peak_22201	chr14	118021911	118022385	475	-2.6484	3.3982	116.085	4.55173e-10	2.12026e-08	Intron (uc007uym.2/13190, intron 6 of 7)	14	118012790	118052246	39457	29861	ENSMUSG00000022129	Dct
Peak_61888	chr8	49242859	49243482	624	-2.83927	3.65141	116.039	4.56801e-10	2.12641e-08	Distal Intergenic	8	48225665	48674690	449026	-568169	ENSMUSG00000031561	Tenm3
Peak_35471	chr2	25373406	25374034	629	3.05023	4.11702	118.608	4.58345e-10	2.13217e-08	Promoter (1-2kb)	2	25372035	25378213	6179	1371	ENSMUSG00000026955	Sapcd2
Peak_65199	chr9	45382327	45382807	481	3.26097	3.68056	115.987	4.58659e-10	2.13219e-08	Intron (uc009pfs.1/59095, intron 1 of 7)	9	45370185	45396159	25975	12142	ENSMUSG00000066705	Fxyd6
Peak_37634	chr2	101639565	101640237	673	-2.82319	3.41382	115.969	4.59323e-10	2.13385e-08	3' UTR	2	101638252	101649532	11281	9295	ENSMUSG00000061311	Rag1
Peak_39127	chr2	146604565	146604912	348	-4.67289	2.56007	115.873	4.62749e-10	2.14832e-08	Distal Intergenic	2	146542931	146546108	3178	61634	ENSMUSG00000085796	4933406D12Rik
Peak_62773	chr8	81770529	81771133	605	2.22892	4.55305	115.719	4.68361e-10	2.17292e-08	Exon (uc009mje.2/234515, exon 8 of 25)	8	81856368	82122570	266203	-85235	ENSMUSG00000037940	Inpp4b
Peak_51289	chr5	75223944	75224328	385	3.03384	3.54362	115.688	4.69512e-10	2.17509e-08	Distal Intergenic	5	75176831	75176904	74	47113	ENSMUSG00000099060	Mir7025
Peak_40242	chr3	6886823	6887667	845	-2.12968	4.63045	115.683	4.69685e-10	2.17509e-08	Distal Intergenic	3	6615413	6620443	5031	-266380	ENSMUSG00000069118	1700008P02Rik
Peak_59327	chr7	96718623	96719518	896	1.69414	5.11595	115.681	4.69772e-10	2.17509e-08	Intron (uc009iiq.2/23966, intron 10 of 32)	7	96643999	96732280	88282	74624	ENSMUSG00000048078	Tenm4
Peak_33466	chr19	14240717	14241373	657	-2.40408	4.54099	118.444	4.72299e-10	2.18533e-08	Distal Intergenic	19	14438480	14438506	27	197133	ENSMUSG00000095132	Rnu6
Peak_41005	chr3	35560325	35560867	543	2.94776	3.45856	115.598	4.72797e-10	2.18617e-08	Distal Intergenic	3	35597152	35666163	69012	105296	ENSMUSG00000105662	Gm6639
Peak_67176	chr9	114042292	114042992	701	2.33858	4.5879	116.501	4.7585e-10	2.19882e-08	Distal Intergenic	9	114057354	114098733	41380	-14362	ENSMUSG00000086596	Susd5
Peak_39728	chr2	165745377	165746001	625	-3.07978	3.15362	115.469	4.77618e-10	2.20552e-08	Intron (uc008nxw.2/14049, intron 9 of 15)	2	165664786	165771727	106942	80591	ENSMUSG00000017897	Eya2
Peak_29737	chr17	72992229	72992752	524	3.72452	3.93657	121.476	4.77991e-10	2.20577e-08	Distal Intergenic	17	72918305	72941946	23642	73924	ENSMUSG00000024063	Lbh
Peak_59786	chr7	113960872	113961844	973	-3.06878	3.68282	115.442	4.78626e-10	2.20723e-08	Intron (uc009jhv.2/233744, intron 6 of 15)	7	114046782	114117781	71000	155937	ENSMUSG00000055723	Rras2
Peak_50411	chr5	42660554	42661263	710	2.89048	3.68287	115.374	4.81196e-10	2.2176e-08	Distal Intergenic	5	43233463	43237919	4457	-572200	ENSMUSG00000039782	Cpeb2
Peak_6676	chr10	39850167	39850558	392	3.88163	3.01301	115.353	4.81986e-10	2.21977e-08	Intron (uc007ewd.1/19714, intron 24 of 31)	10	39827710	39842823	15114	22457	ENSMUSG00000019841	Rev3l
Peak_54159	chr6	38882580	38883286	707	3.0215	3.71837	115.277	4.84858e-10	2.23151e-08	Intron (uc009blc.1/21391, intron 1 of 5)	6	38697840	38876190	178351	-6390	ENSMUSG00000061436	Hipk2
Peak_8694	chr10	105095679	105096526	848	-2.40846	4.38983	115.319	4.85309e-10	2.2321e-08	Distal Intergenic	10	105187664	105574479	386816	477953	ENSMUSG00000036019	Tmtc2
Peak_15408	chr12	95558636	95559346	711	-2.38519	4.30041	115.213	4.87299e-10	2.23976e-08	Distal Intergenic	12	95692226	95785213	92988	-132880	ENSMUSG00000047414	Flrt2
Peak_38729	chr2	134822099	134822491	393	3.43808	3.12772	115.16	4.89337e-10	2.24764e-08	Intron (uc008mnv.2/18795, intron 2 of 2)	2	134786164	135475258	689095	35935	ENSMUSG00000051177	Plcb1
Peak_30254	chr17	88546759	88547114	356	4.54372	3.22615	117.961	4.89827e-10	2.2484e-08	Intron (uc008dvo.2/73825, intron 3 of 21)	17	88530124	88588367	58244	16635	ENSMUSG00000034709	Ppp1r21
Peak_60081	chr7	124935515	124936365	851	2.41247	4.40924	115.135	4.90289e-10	2.24902e-08	Distal Intergenic	7	124625670	124708935	83266	-226580	ENSMUSG00000086254	3100003L05Rik
Peak_35729	chr2	32718677	32719155	479	2.96193	3.70521	115.116	4.9102e-10	2.25079e-08	Promoter (1-2kb)	2	32721055	32755007	33953	-1900	ENSMUSG00000059013	Sh2d3c
Peak_44523	chr3	142237515	142238016	502	-3.02179	3.51642	115.108	4.91323e-10	2.25079e-08	Downstream (1-2kb)	3	141837136	142169228	332093	-68287	ENSMUSG00000052430	Bmpr1b
Peak_50601	chr5	48718270	48718994	725	2.29523	4.08168	115.077	4.92514e-10	2.25461e-08	Intron (uc008xjw.1/80334, intron 1 of 7)	5	48389503	48599682	210180	-118588	ENSMUSG00000029088	Kcnip4
Peak_33236	chr19	5856577	5856949	373	5.14087	2.82015	115.069	4.92808e-10	2.25461e-08	Exon (uc008gfn.1/67457, exon 10 of 11)	19	5824710	5845480	20771	-11097	ENSMUSG00000092274	Neat1
Peak_3602	chr1	136691241	136691574	334	3.61533	2.83912	115.047	4.93693e-10	2.25716e-08	Distal Intergenic	1	136696211	136725728	29518	-4637	NA	Platr22
Peak_58374	chr7	63768411	63768973	563	2.92585	3.34612	115.025	4.94539e-10	2.25954e-08	Distal Intergenic	7	63916857	63920539	3683	-147884	ENSMUSG00000095061	E030018B13Rik
Peak_48403	chr4	122958311	122958948	638	2.78218	4.37866	119.386	5.01886e-10	2.29159e-08	Promoter (2-3kb)	4	122946851	122961188	14338	2240	ENSMUSG00000028655	Mfsd2a
Peak_64731	chr9	29247731	29248207	477	-3.69068	2.90018	114.729	5.06161e-10	2.30903e-08	Intron (uc009oqt.1/235106, intron 1 of 6)	9	28995964	29411943	415980	163736	ENSMUSG00000059974	Ntm
Peak_2825	chr1	107642558	107643231	674	-3.62975	3.77023	120.313	5.06373e-10	2.30903e-08	Distal Intergenic	1	107590006	107608978	18973	52552	ENSMUSG00000026315	Serpinb8
Peak_16283	chr13	13628840	13629663	824	2.5801	3.92832	114.715	5.06721e-10	2.3091e-08	Intron (uc007pmh.1/17101, intron 3 of 4)	13	13590409	13777440	187032	38431	ENSMUSG00000019726	Lyst
Peak_61548	chr8	36857909	36858356	448	3.8222	3.31252	114.695	5.07541e-10	2.31132e-08	Exon (uc012gcj.2/50768, exon 3 of 18)	8	36567739	36952442	384704	94086	ENSMUSG00000031523	Dlc1
Peak_30930	chr18	22481713	22482240	528	-3.25067	3.09126	114.678	5.08227e-10	2.31292e-08	Intron (uc008efm.2/211961, intron 9 of 12)	18	22345089	22530227	185139	136624	ENSMUSG00000045215	Asxl3
Peak_23634	chr15	51766092	51766808	717	2.52492	4.17621	114.667	5.08636e-10	2.31326e-08	Distal Intergenic	15	51786563	51865461	78899	98653	ENSMUSG00000022312	Eif3h
Peak_50968	chr5	65166570	65166889	320	4.11237	2.85067	114.63	5.10128e-10	2.31852e-08	Intron (uc008xna.2/71778, intron 10 of 10)	5	65156055	65168142	12088	10515	ENSMUSG00000054920	Klhl5
Peak_9372	chr10	124349290	124349662	373	3.17111	3.61158	114.49	5.15794e-10	2.34166e-08	Distal Intergenic	10	124469074	124524488	55415	-119412	ENSMUSG00000112364	4930503E24Rik
Peak_1757	chr1	68955517	68955955	439	3.58727	3.45976	114.474	5.16436e-10	2.34166e-08	Intron (uc007bjb.2/13869, intron 1 of 26)	1	68032187	69108059	1075873	152104	ENSMUSG00000062209	Erbb4
Peak_30510	chr18	8191859	8192574	716	-2.9381	3.63118	114.474	5.16457e-10	2.34166e-08	Distal Intergenic	18	7869716	7916297	46582	322143	ENSMUSG00000024283	Wac
Peak_59336	chr7	96832545	96833318	774	-1.92851	4.6859	114.471	5.16572e-10	2.34166e-08	Intron (uc009iiq.2/23966, intron 19 of 32)	7	96791433	96801549	10117	-30996	ENSMUSG00000053049	Gm15413
Peak_26060	chr16	28901146	28901599	454	3.62402	3.50908	114.453	5.17302e-10	2.34343e-08	Intron (uc007yvv.1/239796, intron 1 of 1)	16	28826176	28929698	103523	28099	ENSMUSG00000051065	Mb21d2
Peak_46796	chr4	63405221	63405447	227	-2.87751	3.45664	114.415	5.18865e-10	2.34897e-08	Promoter (1-2kb)	4	63386029	63403445	17417	-1776	ENSMUSG00000039158	Akna
Peak_19631	chr14	11791149	11791591	443	3.16548	3.1948	114.332	5.22251e-10	2.36276e-08	Intron (uc007sfl.1/19270, intron 2 of 3)	14	11553553	12242039	688487	237596	ENSMUSG00000021745	Ptprg
Peak_44532	chr3	142318169	142318649	481	2.16053	4.52735	114.244	5.259e-10	2.37771e-08	Intron (uc008rol.2/56376, intron 3 of 12)	3	142302080	142391850	89771	73201	ENSMUSG00000028273	Pdlim5
Peak_45489	chr4	12613989	12614500	512	3.33569	3.05163	114.195	5.27941e-10	2.38538e-08	Distal Intergenic	4	12906837	12981485	74649	-292337	ENSMUSG00000055963	Triqk
Peak_20708	chr14	57315661	57316441	781	2.68391	3.97716	114.143	5.30115e-10	2.39364e-08	Intron (uc007ucz.1/68631, intron 3 of 7)	14	57275034	57398483	123450	82042	ENSMUSG00000021947	Cryl1
Peak_9765	chr11	8743949	8744741	793	2.45159	4.1339	114.114	5.31358e-10	2.39769e-08	Distal Intergenic	11	8545693	8664535	118843	-79414	ENSMUSG00000020422	Tns3
Peak_58845	chr7	77933160	77933561	402	2.9998	3.26423	114.104	5.3176e-10	2.39794e-08	Distal Intergenic	7	78300691	78377822	77132	444261	ENSMUSG00000059146	Ntrk3
Peak_49927	chr5	25666111	25666479	369	-2.74528	3.33237	114.065	5.33404e-10	2.40379e-08	Distal Intergenic	5	25689816	25705797	15982	39318	ENSMUSG00000028933	Xrcc2
Peak_16683	chr13	24223523	24224163	641	3.17198	3.52566	113.973	5.3729e-10	2.41973e-08	Intron (uc007pvn.2/68732, intron 2 of 37)	13	24012481	24280790	268310	56627	ENSMUSG00000021338	Carmil1
Peak_23778	chr15	56615798	56616874	1077	1.75712	5.47329	117.72	5.3787e-10	2.42076e-08	Distal Intergenic	15	56689944	56694460	4517	-73070	ENSMUSG00000086541	Has2os
Peak_844	chr1	37565428	37565848	421	3.93116	3.56471	117.502	5.38237e-10	2.42084e-08	Distal Intergenic	1	37439340	37541016	101677	-24412	ENSMUSG00000026110	Mgat4a
Peak_34017	chr19	31410066	31410783	718	2.49891	4.16169	113.919	5.39588e-10	2.42534e-08	Intron (uc008heo.2/19091, intron 2 of 17)	19	31213543	31216396	2854	-193670	NA	8430431K14Rik
Peak_37595	chr2	97478188	97479368	1181	1.56227	5.95123	118.673	5.40249e-10	2.42674e-08	Intron (uc008lhc.2/241568, intron 6 of 7)	2	97467657	97631664	164008	10531	ENSMUSG00000050587	Lrrc4c
Peak_21335	chr14	76798710	76799339	630	2.89787	4.28707	118.346	5.41455e-10	2.43058e-08	Distal Intergenic	14	76677568	76687108	9541	121142	ENSMUSG00000101009	1700108F19Rik
Peak_26419	chr16	40233939	40234556	618	2.97238	4.13248	116.604	5.41873e-10	2.43088e-08	Intron (uc007zfq.1/uc007zfq.1, intron 1 of 2)	16	39984371	42176292	2191922	249568	ENSMUSG00000061080	Lsamp
Peak_44547	chr3	142617304	142617722	419	3.11042	3.53782	113.801	5.4469e-10	2.44193e-08	Promoter (2-3kb)	3	142620663	142638008	17346	-2941	ENSMUSG00000028270	Gbp2
Peak_50814	chr5	54852819	54853268	450	-3.2958	3.19806	113.79	5.45128e-10	2.44231e-08	Distal Intergenic	5	54349992	54358542	8551	502827	ENSMUSG00000105912	Gm10440
Peak_46380	chr4	48605560	48605994	435	2.79452	3.47703	113.751	5.46836e-10	2.44756e-08	Intron (uc008svk.1/230157, intron 2 of 9)	4	48610413	48663131	52719	-4419	ENSMUSG00000028347	Tmeff1
Peak_53996	chr6	34156802	34157120	319	3.1739	3.24275	113.747	5.47006e-10	2.44756e-08	3' UTR	6	34155879	34163482	7604	6362	ENSMUSG00000018999	Slc35b4
Peak_33096	chr18	88599892	88600309	418	-3.73047	3.26653	113.965	5.47947e-10	2.45019e-08	Distal Intergenic	18	88688067	88894207	206141	293898	ENSMUSG00000056153	Socs6
Peak_46364	chr4	48287200	48287910	711	2.59966	4.071	113.7	5.49069e-10	2.45362e-08	Intron (uc008suz.2/16348, intron 2 of 2)	4	48279760	48431953	152194	7440	ENSMUSG00000028344	Invs
Peak_60986	chr8	16837393	16837938	546	2.42304	4.33912	113.69	5.49489e-10	2.45391e-08	Intron (uc009kzp.1/94109, intron 3 of 69)	8	16168757	16168838	82	-668555	ENSMUSG00000093142	Mir3106
Peak_31113	chr18	27617127	27617611	485	-3.18003	3.56625	113.664	5.50619e-10	2.45737e-08	Distal Intergenic	18	28560166	28998176	438011	-942555	NA	4930474G06Rik
Peak_23494	chr15	42329702	42330158	457	2.6307	4.2305	113.648	5.51344e-10	2.45902e-08	Distal Intergenic	15	42424667	42676977	252311	346819	ENSMUSG00000022309	Angpt1
Peak_38079	chr2	114060051	114060537	487	3.34451	3.37918	113.624	5.52377e-10	2.46081e-08	Intron (uc008lpx.2/100303644, intron 5 of 5)	2	114056316	114064868	8553	3735	ENSMUSG00000092397	C130080G10Rik
Peak_66077	chr9	78124192	78124619	428	3.56754	4.00873	119.884	5.52456e-10	2.46081e-08	Intron (uc009qtt.2/56542, intron 1 of 13)	9	78113238	78172109	58872	10954	ENSMUSG00000009828	Ick
Peak_68357	chrX	98751274	98751839	566	3.05479	3.79656	113.523	5.56837e-10	2.47873e-08	Intron (uc009tux.2/94190, intron 6 of 25)	20	98554280	98891025	336746	139186	ENSMUSG00000031214	Ophn1
Peak_36024	chr2	43978295	43979189	895	-2.13672	4.32243	113.468	5.5926e-10	2.48792e-08	Intron (uc008jov.1/76117, intron 6 of 9)	2	44059238	44065324	6087	86135	ENSMUSG00000085089	Arhgap15os
Peak_37279	chr2	83690413	83690842	430	3.29565	3.46672	113.41	5.61848e-10	2.49782e-08	Distal Intergenic	2	83660010	83664616	4607	30403	ENSMUSG00000027091	Zc3h15
Peak_24553	chr15	79152794	79153143	350	3.78009	3.26085	113.345	5.64747e-10	2.5091e-08	Downstream (1-2kb)	15	79154913	79164506	9594	11363	ENSMUSG00000033006	Sox10
Peak_37640	chr2	101781431	101781824	394	3.55589	3.19898	113.265	5.68382e-10	2.52257e-08	Intron (uc008lho.2/72446, intron 1 of 8)	2	101714285	101772408	58124	-9023	ENSMUSG00000032841	Prr5l
Peak_45066	chr3	155947345	155947740	396	-3.19348	2.96127	113.262	5.68507e-10	2.52257e-08	Distal Intergenic	3	155976354	156008592	32239	-28614	ENSMUSG00000104553	9330178D15Rik
Peak_46360	chr4	48105426	48105792	367	3.42168	3.46117	113.187	5.71879e-10	2.5359e-08	Distal Intergenic	4	48124919	48185911	60993	-19127	ENSMUSG00000061455	Stx17
Peak_22228	chr14	118422284	118423213	930	1.901	5.07533	114.167	5.72892e-10	2.53877e-08	Distal Intergenic	14	118365878	118398165	32288	56406	ENSMUSG00000099911	1700044C05Rik
Peak_66647	chr9	96854464	96854849	386	2.90595	3.88161	113.131	5.74463e-10	2.5441e-08	Intron (uc009rcu.2/235534, intron 3 of 6)	9	96823343	96889474	66132	34625	ENSMUSG00000043587	Pxylp1
Peak_52146	chr5	112050259	112050870	612	-3.03901	3.39168	113.111	5.75375e-10	2.54651e-08	Distal Intergenic	5	112206763	112210002	3240	-155893	ENSMUSG00000101683	1700028D13Rik
Peak_28193	chr17	15990358	15990652	295	-3.2047	3.70409	114.058	5.77841e-10	2.55436e-08	Distal Intergenic	17	15819345	15826586	7242	-163772	ENSMUSG00000048027	Rgmb
Peak_7580	chr10	71272980	71273507	528	2.70722	3.84594	113.054	5.77997e-10	2.55436e-08	Intron (uc007foo.2/216080, intron 1 of 6)	10	71254980	71285262	30283	11755	ENSMUSG00000019927	Ube2d1
Peak_57805	chr7	34929910	34930289	380	3.45085	3.19568	113.048	5.78256e-10	2.55436e-08	Intron (uc009gjj.2/18624, intron 3 of 14)	7	34945587	35021770	76184	-15298	ENSMUSG00000063931	Pepd
Peak_68037	chrX	66526841	66527254	414	3.0885	3.34203	113.025	5.79317e-10	2.55742e-08	Distal Intergenic	20	66649318	66661402	12085	-122064	ENSMUSG00000036790	Slitrk2
Peak_6188	chr10	22644197	22645566	1370	1.28258	5.60118	112.978	5.8151e-10	2.56546e-08	Promoter (<=1kb)	10	22645011	22703880	58870	0	ENSMUSG00000037490	Slc2a12
Peak_6710	chr10	40932022	40932616	595	3.20879	3.54326	112.962	5.82244e-10	2.56706e-08	Exon (uc007exi.2/83767, exon 5 of 9)	10	40883534	40938569	55036	48488	ENSMUSG00000019831	Wasf1
Peak_45043	chr3	154816266	154817595	1330	-1.38217	5.94639	113.667	5.83779e-10	2.57126e-08	Intron (uc008rus.2/435766, intron 23 of 24)	3	154711133	154749012	37880	105133	ENSMUSG00000078161	Erich3
Peak_48414	chr4	123054345	123054810	466	3.57915	3.46457	112.926	5.83937e-10	2.57126e-08	3' UTR	4	123048769	123052601	3833	5576	ENSMUSG00000028653	Trit1
Peak_19712	chr14	14599554	14600043	490	3.06752	3.69117	112.802	5.89741e-10	2.59326e-08	Distal Intergenic	14	14703025	14775512	72488	-102982	ENSMUSG00000021733	Slc4a7
Peak_52171	chr5	112877077	112877966	890	2.39005	3.96977	112.795	5.90046e-10	2.59326e-08	Intron (uc008ytr.2/74376, intron 3 of 43)	5	112817226	112872496	55271	-4581	ENSMUSG00000072720	Myo18b
Peak_36276	chr2	51986159	51986578	420	3.32421	3.38952	112.791	5.90259e-10	2.59326e-08	Distal Intergenic	2	51948499	51973208	24710	-12951	ENSMUSG00000026946	Nmi
Peak_66858	chr9	103558345	103559547	1203	2.15259	5.03205	118.952	5.90433e-10	2.59326e-08	Promoter (1-2kb)	9	103557090	103565891	8802	1255	ENSMUSG00000099616	4932413F04Rik
Peak_34008	chr19	31188709	31189417	709	-2.97556	3.22049	112.731	5.93108e-10	2.60228e-08	Intron (uc008heo.2/19091, intron 3 of 17)	19	31213543	31216396	2854	26979	NA	8430431K14Rik
Peak_25993	chr16	26626151	26626601	451	3.07715	3.07986	112.728	5.9324e-10	2.60228e-08	Intron (uc007yvd.2/16180, intron 2 of 7)	16	26581705	26725147	143443	44446	ENSMUSG00000022514	Il1rap
Peak_51426	chr5	82288389	82288983	595	2.17462	4.86965	117.118	5.93684e-10	2.60259e-08	Distal Intergenic	5	82798944	82799065	122	510082	ENSMUSG00000080586	Mir1187
Peak_8645	chr10	102510917	102511288	372	3.43294	3.51023	112.655	5.96719e-10	2.61362e-08	Promoter (<=1kb)	10	102512222	102546560	34339	-934	ENSMUSG00000044921	Rassf9
Peak_10376	chr11	32141862	32142346	485	-2.8014	3.29	112.65	5.96957e-10	2.61362e-08	Distal Intergenic	11	32095259	32101228	5970	-40634	ENSMUSG00000086386	Gm12108
Peak_31051	chr18	25525480	25525982	503	-2.4641	3.98672	112.635	5.97644e-10	2.61498e-08	Intron (uc008ehk.2/108013, intron 3 of 11)	18	25477620	25753983	276364	228001	ENSMUSG00000024268	Celf4
Peak_34021	chr19	31616061	31616474	414	3.32336	3.14317	112.592	5.99729e-10	2.62244e-08	Intron (uc008heo.2/19091, intron 1 of 17)	19	30564487	31664370	1099884	47896	ENSMUSG00000052920	Prkg1
Peak_57192	chr6	146399988	146400440	453	2.97537	3.72993	112.429	6.07602e-10	2.65519e-08	Intron (uc009erw.2/16439, intron 10 of 56)	6	146108299	146502223	393925	101783	ENSMUSG00000030287	Itpr2
Peak_42288	chr3	80871432	80871809	378	-3.84301	3.27285	113.395	6.08825e-10	2.65886e-08	Intron (uc012cqq.2/14658, intron 3 of 7)	3	80860161	80878076	17916	6267	ENSMUSG00000028020	Glrb
Peak_47732	chr4	98166300	98166866	567	3.09258	3.41273	112.291	6.14326e-10	2.68119e-08	Distal Intergenic	4	98355370	98380691	25322	213825	ENSMUSG00000028563	Tm2d1
Peak_7	chr1	3410890	3411174	285	3.9951	2.78831	112.224	6.17673e-10	2.6941e-08	Intron (uc007aeu.1/497097, intron 2 of 2)	1	3214482	3671498	457017	260324	ENSMUSG00000051951	Xkr4
Peak_10909	chr11	49831951	49832345	395	3.73248	3.24786	112.215	6.18089e-10	2.69421e-08	Intron (uc011xud.1/14584, intron 16 of 18)	11	49846751	49873395	26645	-14406	ENSMUSG00000020366	Mapk9
Peak_43578	chr3	117593545	117594051	507	3.30415	3.30037	112.186	6.19522e-10	2.69876e-08	Intron (uc008rda.3/75769, intron 1 of 5)	3	117575227	117689508	114282	18318	ENSMUSG00000033342	Plppr5
Peak_20428	chr14	48086733	48087128	396	3.1843	3.54137	112.169	6.20404e-10	2.70049e-08	Distal Intergenic	14	48120869	48260883	140015	-33741	ENSMUSG00000021846	Peli2
Peak_56695	chr6	129326535	129327119	585	2.77898	3.80467	112.146	6.2151e-10	2.70049e-08	Exon (uc009efk.1/381816, exon 3 of 5)	6	129322165	129331781	9617	4662	ENSMUSG00000047720	4922502D21Rik
Peak_20916	chr14	64377522	64378387	866	-3.2393	3.96021	117.1	6.21676e-10	2.70049e-08	Intron (uc007uig.2/110265, intron 1 of 5)	14	64122621	64416956	294336	38569	ENSMUSG00000054733	Msra
Peak_66713	chr9	99119691	99120314	624	2.89431	3.54702	112.141	6.2179e-10	2.70049e-08	Promoter (2-3kb)	9	99038402	99122376	83975	2062	ENSMUSG00000032462	Pik3cb
Peak_58418	chr7	64631797	64632122	326	3.01976	3.23909	112.139	6.2187e-10	2.70049e-08	Intron (uc009hgj.2/11784, intron 2 of 14)	7	64502138	64753876	251739	129659	ENSMUSG00000030519	Apba2
Peak_58119	chr7	49163754	49164243	490	-2.17737	3.95335	112.115	6.23074e-10	2.70182e-08	Intron (uc057ahh.1/78286, intron 2 of 38)	7	49246189	49410398	164210	-81946	ENSMUSG00000052512	Nav2
Peak_33578	chr19	17565995	17566473	479	2.75563	3.65772	112.1	6.23809e-10	2.70182e-08	Intron (uc008gxp.3/18552, intron 17 of 37)	19	17394043	17401349	7307	171952	ENSMUSG00000024712	Rfk
Peak_5204	chr1	185741110	185741934	825	-2.23121	4.39978	112.097	6.23987e-10	2.70182e-08	Distal Intergenic	1	185497306	185498014	709	243804	ENSMUSG00000102185	5033404E19Rik
Peak_17024	chr13	35453265	35454069	805	2.91327	4.29753	116.459	6.24931e-10	2.70182e-08	Distal Intergenic	13	35659862	35874064	214203	-205793	ENSMUSG00000059288	Cdyl
Peak_67241	chr9	116428441	116428851	411	3.31196	3.0456	112.071	6.25275e-10	2.70182e-08	Distal Intergenic	9	116087695	116175363	87669	-253078	ENSMUSG00000032440	Tgfbr2
Peak_29822	chr17	75486234	75486584	351	3.73256	3.34793	112.069	6.25407e-10	2.70182e-08	Intron (uc012axi.1/240168, intron 1 of 16)	17	75465538	75529053	63516	20696	ENSMUSG00000071042	Rasgrp3
Peak_16935	chr13	32545189	32545732	544	3.04248	3.63023	112.067	6.25476e-10	2.70182e-08	Distal Intergenic	13	32099227	32338544	239318	-206645	ENSMUSG00000038372	Gmds
Peak_40127	chr2	180604768	180605226	459	3.23225	3.50989	112.065	6.25581e-10	2.70182e-08	Promoter (1-2kb)	2	180603185	180613415	10231	1583	ENSMUSG00000027570	Col9a3
Peak_1072	chr1	43583688	43584007	320	3.39046	2.73631	112.056	6.26051e-10	2.70182e-08	Distal Intergenic	1	43445751	43570518	124768	137937	ENSMUSG00000066877	Nck2
Peak_34243	chr19	40426116	40426461	346	3.33593	3.0831	112.055	6.26079e-10	2.70182e-08	Intron (uc008hkn.1/20411, intron 1 of 22)	19	40292040	40402310	110271	-23806	ENSMUSG00000025006	Sorbs1
Peak_48092	chr4	109813457	109814085	629	3.30955	3.58606	112.033	6.27201e-10	2.70344e-08	Intron (uc008uct.1/14084, intron 8 of 18)	4	109736591	109742957	6367	76866	ENSMUSG00000010517	Faf1
Peak_44995	chr3	153819433	153820026	594	2.66465	4.27969	112.951	6.27235e-10	2.70344e-08	Distal Intergenic	3	153844247	153853615	9369	-24221	ENSMUSG00000038997	Asb17
Peak_47561	chr4	91481840	91482419	580	-2.81908	3.07105	112.021	6.2782e-10	2.70428e-08	Distal Intergenic	4	91250767	91399984	149218	-81856	ENSMUSG00000008489	Elavl2
Peak_29109	chr17	51204534	51205035	502	3.54071	3.6794	113.212	6.3051e-10	2.71417e-08	Distal Intergenic	17	50917527	51179352	261826	-25182	ENSMUSG00000023923	Tbc1d5
Peak_45148	chr3	158886128	158887140	1013	-2.18439	4.77478	116.294	6.31819e-10	2.71812e-08	Distal Intergenic	3	159076364	159308080	231717	-189224	ENSMUSG00000106053	Gm20752
Peak_2108	chr1	80091260	80091705	446	3.51509	3.24395	111.915	6.33188e-10	2.72232e-08	Distal Intergenic	1	80198699	80213944	15246	122239	ENSMUSG00000043230	Fam124b
Peak_63254	chr8	96099407	96099953	547	-3.19829	3.83345	115.095	6.35003e-10	2.72842e-08	Distal Intergenic	8	95864137	95888365	24229	-211042	ENSMUSG00000031672	Got2
Peak_53634	chr6	20397229	20397849	621	3.55287	3.30732	111.807	6.38696e-10	2.74105e-08	Distal Intergenic	6	21216109	21729805	513697	-818260	ENSMUSG00000060882	Kcnd2
Peak_17445	chr13	51920295	51921259	965	-2.65583	3.9733	111.802	6.38926e-10	2.74105e-08	Distal Intergenic	13	51846675	51848474	1800	73620	ENSMUSG00000021453	Gadd45g
Peak_26772	chr16	52428496	52429143	648	2.71387	4.28759	114.488	6.39129e-10	2.74105e-08	Intron (uc007zli.2/11658, intron 1 of 15)	16	52248996	52452997	204002	23854	ENSMUSG00000022636	Alcam
Peak_1530	chr1	61257464	61257877	414	3.53916	3.09861	111.781	6.4001e-10	2.74306e-08	Distal Intergenic	1	61378432	61395904	17473	-120555	ENSMUSG00000085447	9530026F06Rik
Peak_265	chr1	14718596	14718930	335	-3.60083	2.6483	111.774	6.4039e-10	2.74306e-08	Distal Intergenic	1	14753346	14755966	2621	37036	ENSMUSG00000025930	Msc
Peak_39131	chr2	146628629	146629220	592	3.64661	3.22366	111.725	6.42901e-10	2.75211e-08	Distal Intergenic	2	146542931	146546108	3178	85698	ENSMUSG00000085796	4933406D12Rik
Peak_55116	chr6	78935461	78935847	387	-3.08753	3.14227	111.71	6.43712e-10	2.75314e-08	Distal Intergenic	6	79032042	79035869	3828	-96195	ENSMUSG00000108072	Gm20362
Peak_22950	chr15	25896437	25896728	292	4.17917	2.83047	111.703	6.4404e-10	2.75314e-08	Intron (uc007vjf.2/66270, intron 3 of 8)	15	25933552	25973696	40145	-36824	ENSMUSG00000022270	Retreg1
Peak_69177	chrX	167934515	167935122	608	3.91776	3.66709	116.056	6.44335e-10	2.75314e-08	Intron (uc057atq.1/333605, intron 1 of 17)	20	167471306	167855077	383772	-79438	ENSMUSG00000049176	Frmpd4
Peak_3179	chr1	127408868	127409474	607	-2.50809	3.66178	111.648	6.46898e-10	2.76239e-08	Intron (uc007ckr.1/107895, intron 11 of 17)	1	127306637	127482972	176336	102231	ENSMUSG00000036155	Mgat5
Peak_49498	chr5	9296195	9296769	575	2.51796	3.86477	111.617	6.48531e-10	2.76765e-08	Intron (uc008wlh.1/231014, intron 1 of 3)	5	9266193	9480717	214525	30002	ENSMUSG00000056004	9330182L06Rik
Peak_22355	chr14	121656795	121657268	474	3.68996	3.71896	115.914	6.50341e-10	2.77367e-08	Promoter (<=1kb)	14	121542152	121657636	115485	368	ENSMUSG00000025558	Dock9
Peak_9387	chr10	125607743	125608513	771	-2.6415	3.79486	111.573	6.50863e-10	2.77374e-08	Distal Intergenic	10	125227485	125328535	101051	-279208	ENSMUSG00000020102	Slc16a7
Peak_60240	chr7	129744079	129744850	772	2.91104	3.97934	111.567	6.5116e-10	2.77374e-08	Distal Intergenic	7	129625056	129633729	8674	119023	ENSMUSG00000042055	Wdr11
Peak_47305	chr4	84289223	84289484	262	3.48874	2.88662	111.526	6.53333e-10	2.78128e-08	Intron (uc008tlg.2/242509, intron 5 of 5)	4	84042040	84044879	2840	-244344	ENSMUSG00000085217	6030471H07Rik
Peak_52164	chr5	112577517	112578292	776	2.41131	4.02218	111.463	6.56639e-10	2.79364e-08	Promoter (<=1kb)	5	112419151	112577198	158048	-319	ENSMUSG00000058153	Sez6l
Peak_31813	chr18	48772396	48773234	839	-2.51031	4.05401	111.45	6.57341e-10	2.79491e-08	Distal Intergenic	18	48045335	48048383	3049	727061	ENSMUSG00000059040	Eno1b
Peak_15249	chr12	86982584	86982965	382	4.33215	2.66347	111.323	6.64099e-10	2.82191e-08	Downstream (<1kb)	12	86983381	86988676	5296	5711	ENSMUSG00000048483	Zdhhc22
Peak_9860	chr11	12434598	12434952	355	2.6219	3.6867	111.285	6.66126e-10	2.82879e-08	Intron (uc007ibd.2/12808, intron 1 of 14)	11	12236676	12412140	175465	-22458	ENSMUSG00000020173	Cobl
Peak_25713	chr16	17950074	17950467	394	3.40454	3.32468	111.253	6.67848e-10	2.83222e-08	Distal Intergenic	16	17925211	17928219	3009	-21855	ENSMUSG00000003528	Slc25a1
Peak_67355	chr9	120831458	120831752	295	4.11784	2.63419	111.251	6.67988e-10	2.83222e-08	Distal Intergenic	9	120913774	120915250	1477	83498	ENSMUSG00000100146	1700020M21Rik
Peak_7659	chr10	75438286	75438777	492	-2.69683	3.35373	111.248	6.68162e-10	2.83222e-08	Intron (uc007fqj.2/103149, intron 9 of 9)	10	75449510	75463104	13595	-10733	NA	4933407G14Rik
Peak_23213	chr15	34336487	34336979	493	-3.42641	3.42883	111.218	6.72706e-10	2.84974e-08	Intron (uc007vll.1/17181, intron 2 of 2)	15	34349051	34357872	8822	20893	ENSMUSG00000094447	9430069I07Rik
Peak_50342	chr5	39453523	39453868	346	-3.60185	3.15459	111.146	6.73652e-10	2.852e-08	Distal Intergenic	5	39461749	39603574	141826	149706	ENSMUSG00000106741	4930513D17Rik
Peak_51388	chr5	78622152	78622895	744	-2.32067	3.96572	111.065	6.78078e-10	2.86776e-08	Distal Intergenic	5	77465488	77468857	3370	1156664	ENSMUSG00000107232	1700017L05Rik
Peak_20035	chr14	28948189	28948981	793	-2.89279	3.87269	111.384	6.78204e-10	2.86776e-08	Intron (uc007sui.1/12294, intron 34 of 37)	14	29018208	29029776	11569	-69227	ENSMUSG00000045776	Lrtm1
Peak_52943	chr5	144565793	144566191	399	-4.36982	2.52608	111.05	6.78922e-10	2.86905e-08	Distal Intergenic	5	144545887	144557478	11592	19906	ENSMUSG00000059991	Nptx2
Peak_34241	chr19	40382684	40383200	517	3.4387	3.49973	111.035	6.79728e-10	2.8707e-08	Promoter (<=1kb)	19	40364994	40382831	17838	0	ENSMUSG00000025006	Sorbs1
Peak_48117	chr4	110682142	110682537	396	3.33077	3.03805	111.022	6.80469e-10	2.87078e-08	Intron (uc008udb.2/78933, intron 3 of 8)	4	110397698	111663024	1265327	284444	ENSMUSG00000061298	Agbl4
Peak_56008	chr6	109387151	109387765	615	-3.02917	3.61788	111.02	6.80577e-10	2.87078e-08	Distal Intergenic	6	108828641	108859356	30716	558510	ENSMUSG00000030104	Edem1
Peak_30600	chr18	11651217	11651664	448	-3.31579	3.09022	110.991	6.82183e-10	2.87203e-08	Intron (uc008ebl.1/225182, intron 1 of 18)	18	11657349	11696094	38746	-5685	ENSMUSG00000041238	Rbbp8
Peak_36807	chr2	66482056	66482396	341	3.26005	3.14034	110.985	6.82497e-10	2.87203e-08	3' UTR	2	66440880	66547472	106593	41176	NA	Gm13629
Peak_46906	chr4	66515734	66516253	520	-2.9042	3.26331	110.975	6.83058e-10	2.87203e-08	Distal Intergenic	4	66262161	66404483	142323	-111251	ENSMUSG00000028373	Astn2
Peak_38396	chr2	124561978	124562501	524	-2.93414	3.45239	110.974	6.83102e-10	2.87203e-08	Intron (uc008mbk.2/214968, intron 5 of 20)	2	124610106	124662885	52780	-47605	ENSMUSG00000027200	Sema6d
Peak_49722	chr5	20038523	20038834	312	3.59199	3.27207	110.971	6.83295e-10	2.87203e-08	Intron (uc012dsm.1/50791, intron 2 of 22)	5	19907518	20704792	797275	131005	ENSMUSG00000040003	Magi2
Peak_58420	chr7	64696656	64697459	804	-1.9	4.26252	110.969	6.83363e-10	2.87203e-08	Intron (uc009hgj.2/11784, intron 4 of 14)	7	64871650	64873040	1391	175581	ENSMUSG00000070520	Nsmce3
Peak_37140	chr2	77594034	77594645	612	-2.6193	3.55413	110.925	6.85849e-10	2.87937e-08	Intron (uc012bxu.2/241494, intron 1 of 7)	2	77410627	77519666	109040	-74368	ENSMUSG00000027016	Zfp385b
Peak_65876	chr9	71975171	71975589	419	-3.8862	2.60629	110.923	6.85941e-10	2.87937e-08	Intron (uc009qpi.2/21406, intron 5 of 19)	9	71869709	71896096	26388	-79075	ENSMUSG00000032228	Tcf12
Peak_8051	chr10	85008044	85008926	883	-2.18127	4.434	110.911	6.86615e-10	2.88045e-08	Promoter (<=1kb)	10	85008716	85018337	9622	0	ENSMUSG00000035620	Ric8b
Peak_44986	chr3	153636110	153636659	550	2.68535	3.86341	110.894	6.87581e-10	2.88276e-08	Intron (uc008rtw.1/20447, intron 1 of 4)	3	153202509	153725133	522625	88474	ENSMUSG00000052544	St6galnac3
Peak_38371	chr2	123182261	123182674	414	-4.10544	2.8856	110.86	6.89434e-10	2.88878e-08	Distal Intergenic	2	122781999	122809551	27553	400262	ENSMUSG00000005803	Sqor
Peak_39918	chr2	172848379	172848863	485	3.47394	3.66164	111.739	6.94521e-10	2.90833e-08	Distal Intergenic	2	172868012	172940321	72310	91458	ENSMUSG00000008999	Bmp7
Peak_31545	chr18	40430014	40430631	618	-2.88184	3.97906	112.042	6.94948e-10	2.90836e-08	Intron (uc012bch.1/383348, intron 1 of 1)	18	40512993	40531184	18192	-82362	ENSMUSG00000051401	Kctd16
Peak_17713	chr13	63317841	63318322	482	3.52713	3.41132	110.697	6.98651e-10	2.91975e-08	Intron (uc033gmh.1/72061, intron 5 of 5)	13	63301199	63301283	85	-16558	ENSMUSG00000092741	Mir3074-1
Peak_16490	chr13	20228297	20228810	514	2.74712	4.11027	110.747	6.98828e-10	2.91975e-08	Intron (uc007ppm.2/140580, intron 4 of 6)	13	20111512	20342888	231377	116785	ENSMUSG00000041112	Elmo1
Peak_53122	chr5	151296238	151296697	460	3.39971	3.45527	110.69	6.98995e-10	2.91975e-08	Distal Intergenic	5	151368675	151396164	27490	-71978	ENSMUSG00000097321	1700028E10Rik
Peak_37865	chr2	106730658	106731537	880	2.37243	4.31706	110.684	6.99357e-10	2.91975e-08	Intron (uc008llm.2/77015, intron 2 of 6)	2	106695601	106868360	172760	35057	ENSMUSG00000016386	Mpped2
Peak_40853	chr3	31499001	31499763	763	-3.1052	4.31114	121.613	7.00637e-10	2.92165e-08	Distal Intergenic	3	31202856	31310319	107464	-188682	ENSMUSG00000069072	Slc7a14
Peak_1621	chr1	64087758	64088601	844	-1.83133	4.71291	110.661	7.00657e-10	2.92165e-08	Intron (uc007bgo.2/93691, intron 1 of 3)	1	64035671	64121389	85719	32788	ENSMUSG00000025959	Klf7
Peak_23798	chr15	57366205	57366779	575	3.01906	3.64145	110.652	7.01207e-10	2.92219e-08	Intron (uc007vso.1/210463, intron 2 of 11)	15	57243771	57265161	21391	-101044	ENSMUSG00000022366	Slc22a22
Peak_47407	chr4	86647777	86648094	318	-3.49931	2.9723	110.628	7.02552e-10	2.92488e-08	Distal Intergenic	4	86656565	86670059	13495	21965	ENSMUSG00000028494	Plin2
Peak_14552	chr12	59188189	59188511	323	4.89336	2.62466	110.625	7.02697e-10	2.92488e-08	Exon (uc007nqf.2/217615, exon 24 of 25)	12	59200655	59205689	5035	17178	ENSMUSG00000035329	Fbxo33
Peak_14406	chr12	54440713	54441522	810	-3.22152	3.06232	110.59	7.04738e-10	2.93161e-08	Distal Intergenic	12	54387733	54391318	3586	-49395	NA	Gm7550
Peak_46387	chr4	48716900	48717256	357	-3.70195	2.91617	110.561	7.06353e-10	2.93656e-08	Distal Intergenic	4	48663514	48673492	9979	53386	ENSMUSG00000028348	Cavin4
Peak_7010	chr10	52703981	52705173	1193	1.18335	6.19249	110.549	7.07059e-10	2.93678e-08	Intron (uc007fbk.2/215085, intron 1 of 7)	10	52690501	53111622	421122	13480	ENSMUSG00000038602	Slc35f1
Peak_7189	chr10	59089903	59090972	1070	-1.52986	4.79317	110.546	7.07254e-10	2.93678e-08	Intron (uc007fdk.2/237353, intron 7 of 9)	10	59065651	59104879	39229	24252	ENSMUSG00000037990	Sh3rf3
Peak_5098	chr1	182474998	182475490	493	2.9535	3.43956	110.489	7.10537e-10	2.948e-08	Intron (uc007dye.2/12334, intron 15 of 20)	1	182483900	182492561	8662	17071	ENSMUSG00000026509	Capn2
Peak_20930	chr14	64817828	64818334	507	-3.34671	3.20814	110.484	7.10807e-10	2.948e-08	Intron (uc007uip.1/219150, intron 7 of 8)	14	64788003	64803940	15938	29825	ENSMUSG00000060012	Kif13b
Peak_38426	chr2	125684651	125685434	784	2.60109	3.93266	110.437	7.13524e-10	2.95529e-08	Intron (uc008mcv.1/271849, intron 2 of 11)	2	125673100	125675642	2543	11551	ENSMUSG00000091337	Eid1
Peak_59457	chr7	100087627	100088068	442	4.03773	2.96071	110.432	7.1381e-10	2.95529e-08	Exon (uc009imj.1/67967, exon 11 of 12)	7	100082113	100121500	39388	33432	ENSMUSG00000030726	Pold3
Peak_47022	chr4	71808019	71808893	875	-2.40406	4.3051	110.432	7.13847e-10	2.95529e-08	Distal Intergenic	4	72109945	72145428	35484	336535	ENSMUSG00000008305	Tle1
Peak_2766	chr1	105906007	105906848	842	-2.39208	4.0267	110.422	7.144e-10	2.95581e-08	Distal Intergenic	1	105990406	106034079	43674	-83558	ENSMUSG00000038866	Zcchc2
Peak_18737	chr13	100874650	100875006	357	-2.91362	3.52285	110.336	7.19446e-10	2.97491e-08	Distal Intergenic	13	100802648	100833427	30780	-41223	ENSMUSG00000021629	Slc30a5
Peak_50197	chr5	35829866	35830484	619	3.76702	4.32221	126.192	7.20492e-10	2.97746e-08	Intron (uc008xeg.2/231148, intron 8 of 19)	5	35893319	36003922	110604	-62835	ENSMUSG00000029094	Afap1
Peak_12772	chr11	115608545	115609020	476	4.0827	3.67195	116.492	7.21364e-10	2.97747e-08	3' UTR	11	115607919	115612503	4585	3483	ENSMUSG00000020743	Mif4gd
Peak_29342	chr17	62076796	62077191	396	-3.16818	3.25087	110.296	7.21743e-10	2.97747e-08	Distal Intergenic	17	62602957	62881317	278361	804126	ENSMUSG00000048915	Efna5
Peak_37225	chr2	80348402	80348650	249	3.86732	2.88779	110.296	7.21785e-10	2.97747e-08	Intron (uc008khj.1/66861, intron 20 of 22)	2	80315466	80354055	38590	32936	ENSMUSG00000027006	Dnajc10
Peak_7431	chr10	67144205	67144652	448	3.65451	3.33924	110.251	7.24391e-10	2.98644e-08	Intron (uc011xfo.1/108829, intron 1 of 9)	10	67127258	67256326	129069	16947	ENSMUSG00000037876	Jmjd1c
Peak_36793	chr2	66146503	66147249	747	2.60639	4.13696	110.182	7.28473e-10	3.00148e-08	Distal Intergenic	2	66082766	66124793	42028	-21710	ENSMUSG00000026994	Galnt3
Peak_38755	chr2	135359098	135359461	364	3.04827	3.30057	110.163	7.296e-10	3.00304e-08	Intron (uc008mnx.2/18795, intron 23 of 31)	2	135169573	135215616	46044	-143482	ENSMUSG00000085247	4930545L23Rik
Peak_1635	chr1	64409280	64409630	351	-3.61328	3.03498	110.161	7.29718e-10	3.00304e-08	Distal Intergenic	1	64532804	64604548	71745	-123174	ENSMUSG00000025958	Creb1
Peak_4848	chr1	175377221	175377751	531	3.22907	3.2824	110.113	7.32576e-10	3.01164e-08	Intron (uc007dtk.2/24012, intron 2 of 16)	1	175059076	175492545	433470	114794	ENSMUSG00000026527	Rgs7
Peak_58473	chr7	66164217	66164781	565	-2.68589	3.612	110.112	7.32678e-10	3.01164e-08	Intron (uc009hhb.1/269941, intron 2 of 2)	7	66109515	66173798	64284	54702	ENSMUSG00000032640	Chsy1
Peak_48259	chr4	117609262	117609635	374	3.84822	3.09991	110.104	7.33128e-10	3.0117e-08	Intron (uc033idx.1/140546, intron 5 of 7)	4	117582600	117615582	32983	26662	ENSMUSG00000033423	Eri3
Peak_17087	chr13	37527510	37527850	341	3.34402	2.79099	110.082	7.34434e-10	3.01528e-08	Distal Intergenic	13	37345345	37419036	73692	182165	ENSMUSG00000021423	Ly86
Peak_3159	chr1	126895696	126896138	443	3.51023	3.67579	112.363	7.41936e-10	3.04427e-08	Distal Intergenic	1	125913636	126830632	916997	-65064	ENSMUSG00000049690	Nckap5
Peak_4841	chr1	175185658	175185922	265	3.39715	2.8158	109.933	7.43413e-10	3.04823e-08	Intron (uc007dtk.2/24012, intron 4 of 16)	1	175059076	175086226	27151	-99432	ENSMUSG00000026527	Rgs7
Peak_59497	chr7	101173999	101174375	377	3.99672	2.88281	109.927	7.43783e-10	3.04823e-08	Intron (uc009ioc.2/207278, intron 3 of 20)	7	101108775	101284405	175631	65224	ENSMUSG00000030691	Fchsd2
Peak_42485	chr3	86807854	86808445	592	2.47632	3.83144	109.917	7.44441e-10	3.04913e-08	Intron (uc008prl.3/70762, intron 8 of 15)	3	86786150	86793913	7764	-13941	ENSMUSG00000028078	Dclk2
Peak_10647	chr11	40850741	40851150	410	-2.72978	3.17154	109.897	7.45648e-10	3.05226e-08	Distal Intergenic	11	40748552	40755286	6735	-95455	ENSMUSG00000020326	Ccng1
Peak_37381	chr2	90864202	90864550	349	3.27275	3.4164	109.886	7.46282e-10	3.05305e-08	Intron (uc008ktn.2/56428, intron 12 of 12)	2	90847155	90866810	19656	17047	ENSMUSG00000027282	Mtch2
Peak_34650	chr19	55507734	55508104	371	3.82728	2.75671	109.876	7.46901e-10	3.05378e-08	Intron (uc008hxx.2/53611, intron 7 of 7)	19	55316057	55627461	311405	191677	ENSMUSG00000024983	Vti1a
Peak_15860	chr12	112263268	112264110	843	-3.36705	3.47088	110.21	7.48583e-10	3.05885e-08	Distal Intergenic	12	112146208	112181747	35540	117060	ENSMUSG00000021294	Kif26a
Peak_32590	chr18	71975335	71976119	785	-2.87723	3.80156	109.825	7.50054e-10	3.06305e-08	Intron (uc008fop.1/13176, intron 1 of 28)	18	71253632	72351069	1097438	374950	ENSMUSG00000060534	Dcc
Peak_64392	chr9	15732067	15732542	476	-2.63412	3.89293	109.809	7.5099e-10	3.06507e-08	Intron (uc009ogg.1/234967, intron 8 of 10)	9	15709769	15738789	29021	22298	ENSMUSG00000043885	Slc36a4
Peak_54488	chr6	52912633	52913009	377	3.5281	3.20491	109.795	7.5187e-10	3.06685e-08	Intron (uc009bzb.2/231986, intron 1 of 4)	6	52768068	52909620	141553	-3013	ENSMUSG00000063568	Jazf1
Peak_64936	chr9	36850005	36850734	730	2.49382	4.43387	111.628	7.53042e-10	3.06982e-08	Exon (uc009ouc.1/235180, exon 3 of 10)	9	36843662	36878640	34979	6343	ENSMUSG00000032118	Fez1
Peak_11969	chr11	89381884	89382775	892	1.9739	4.59474	109.75	7.5463e-10	3.07449e-08	Distal Intergenic	11	89390223	89418948	28726	36173	NA	NA
Peak_19925	chr14	23052808	23053618	811	2.54299	3.93604	109.738	7.55361e-10	3.07565e-08	Intron (uc007slz.2/76633, intron 6 of 6)	14	23038195	23094571	56377	40953	ENSMUSG00000068680	Gm10248
Peak_32632	chr18	73422083	73422609	527	-3.22055	3.51284	109.73	7.55842e-10	3.0758e-08	Distal Intergenic	18	73572705	73592578	19874	-150096	ENSMUSG00000037253	Mex3c
Peak_43117	chr3	103944747	103945529	783	-2.70246	3.98377	109.713	7.5693e-10	3.07692e-08	Intron (uc008qtw.1/229675, intron 2 of 7)	3	103968110	104007879	39770	-22581	ENSMUSG00000058388	Phtf1
Peak_65791	chr9	67300603	67301083	481	3.61215	3.00315	109.712	7.57007e-10	3.07692e-08	Intron (uc009qfw.2/70549, intron 10 of 31)	9	67217085	67296442	79358	-4161	ENSMUSG00000052698	Tln2
Peak_30617	chr18	11915065	11915430	366	2.76911	3.60926	109.672	7.59484e-10	3.08418e-08	Intron (uc008ebr.2/63955, intron 4 of 9)	18	11840361	11840438	78	-74627	ENSMUSG00000084565	Mir1901
Peak_23312	chr15	36944665	36945039	375	2.87309	3.27405	109.668	7.59684e-10	3.08418e-08	Distal Intergenic	15	36997027	37007402	10376	62363	ENSMUSG00000062397	Zfp706
Peak_25640	chr16	14893872	14894225	354	2.67687	3.36048	109.656	7.60447e-10	3.08547e-08	Distal Intergenic	16	14906646	14924522	17877	-12421	ENSMUSG00000068617	Efcab1
Peak_8606	chr10	100617178	100617606	429	2.81128	3.68464	109.553	7.66915e-10	3.10989e-08	Intron (uc007gxz.1/66605, intron 12 of 12)	10	100592386	100618391	26006	24792	ENSMUSG00000056912	1700017N19Rik
Peak_9985	chr11	18916616	18917094	479	-2.48713	3.74189	109.526	7.68576e-10	3.11382e-08	Intron (uc007icl.2/17268, intron 8 of 11)	11	18880428	19018969	138542	101875	ENSMUSG00000020160	Meis1
Peak_33369	chr19	9143279	9144189	911	2.29093	4.67266	112.37	7.68784e-10	3.11382e-08	Intron (uc008goo.1/uc008goo.1, intron 2 of 5)	19	9111719	9135566	23848	-7713	ENSMUSG00000024654	Asrgl1
Peak_39142	chr2	146810663	146811163	501	2.50912	3.59515	109.483	7.71307e-10	3.12009e-08	Distal Intergenic	2	146855889	146970089	114201	-44726	ENSMUSG00000074749	Kiz
Peak_58511	chr7	67468720	67469357	638	-3.28838	3.4832	109.481	7.71412e-10	3.12009e-08	Distal Intergenic	7	67251657	67372858	121202	-95862	ENSMUSG00000030557	Mef2a
Peak_13668	chr12	31146461	31146822	362	-3.5569	3.3856	110.424	7.71991e-10	3.12009e-08	Distal Intergenic	12	31168862	31185922	17061	-22040	ENSMUSG00000095953	6030469F06Rik
Peak_50520	chr5	45572842	45573148	307	3.51129	3.04352	109.47	7.72135e-10	3.12009e-08	Intron (uc008xja.2/58227, intron 6 of 15)	5	45520229	45529284	9056	52613	ENSMUSG00000015804	Med28
Peak_1744	chr1	68178237	68178883	647	-3.38381	3.30753	109.456	7.73023e-10	3.12186e-08	Intron (uc007bjb.2/13869, intron 20 of 26)	1	68042441	68071688	29248	-106549	ENSMUSG00000062209	Erbb4
Peak_21357	chr14	77642362	77642877	516	3.30157	3.18741	109.434	7.74383e-10	3.12553e-08	Intron (uc007urw.2/239188, intron 14 of 18)	14	77479483	77506868	27386	-135494	ENSMUSG00000067973	Gm6994
Peak_39094	chr2	145971573	145972065	493	-3.62343	2.89908	109.411	7.75898e-10	3.12952e-08	Intron (uc008msf.1/78774, intron 7 of 15)	2	145934784	146043072	108289	36789	ENSMUSG00000037143	Cfap61
Peak_26484	chr16	43096143	43096387	245	-3.87821	2.4953	109.405	7.76276e-10	3.12952e-08	Intron (uc007zga.3/56490, intron 2 of 10)	16	43074720	43727234	652515	21423	ENSMUSG00000022708	Zbtb20
Peak_15279	chr12	88752916	88753266	351	3.57527	2.98522	109.376	7.78127e-10	3.13516e-08	Intron (uc007ojy.1/18191, intron 1 of 3)	12	88722876	90333465	1610590	30040	ENSMUSG00000066392	Nrxn3
Peak_23553	chr15	44706240	44707116	877	1.08999	5.86591	109.344	7.80167e-10	3.14155e-08	Promoter (<=1kb)	15	44671856	44706488	34633	0	ENSMUSG00000022340	Sybu
Peak_26955	chr16	62468910	62469597	688	-3.3651	3.64404	112.162	7.81527e-10	3.14519e-08	Distal Intergenic	16	62734852	62786716	51865	317119	ENSMUSG00000050312	Nsun3
Peak_46729	chr4	62311741	62312042	302	4.0949	2.7592	109.302	7.82811e-10	3.14853e-08	3' UTR	4	62291547	62298412	6866	20194	ENSMUSG00000066152	Slc31a2
Peak_33579	chr19	17589262	17589748	487	-3.14185	3.44572	109.281	7.8415e-10	3.15208e-08	Intron (uc008gxp.3/18552, intron 12 of 37)	19	17394043	17401349	7307	195219	ENSMUSG00000024712	Rfk
Peak_37878	chr2	106866584	106867055	472	2.99566	3.62559	109.264	7.85251e-10	3.15468e-08	Exon (uc008llm.2/77015, exon 7 of 7)	2	106962529	106970391	7863	103336	ENSMUSG00000027122	Arl14ep
Peak_20557	chr14	53776782	53777695	914	2.57384	4.42245	112.433	7.88157e-10	3.16421e-08	Exon (uc007tuh.3/uc007tuh.3, exon 1 of 3)	14	54235485	54253929	18445	476234	ENSMUSG00000022174	Dad1
Peak_18362	chr13	90394738	90395384	647	1.96875	5.1006	113.422	7.88539e-10	3.16421e-08	Distal Intergenic	13	90089667	90114921	25255	305071	ENSMUSG00000012422	Tmem167
Peak_50268	chr5	37401184	37401410	227	3.70197	2.62754	109.124	7.94345e-10	3.18567e-08	Intron (uc008xfs.2/68525, intron 14 of 19)	5	37338478	37425054	86577	62706	ENSMUSG00000050248	Evc2
Peak_5916	chr10	15140284	15141166	883	-2.40772	3.91836	109.116	7.94869e-10	3.18592e-08	Distal Intergenic	10	14760289	14770556	10268	379995	ENSMUSG00000019865	Nmbr
Peak_7203	chr10	59468854	59469316	463	3.00342	3.54386	109.075	7.97535e-10	3.19476e-08	Intron (uc007fdt.3/215999, intron 2 of 7)	10	59446984	59458160	11177	-10694	ENSMUSG00000009647	Mcu
Peak_47802	chr4	100188007	100188647	641	-2.96655	4.18001	115.085	7.98635e-10	3.19731e-08	Intron (uc008tvc.1/26563, intron 1 of 3)	4	100095791	100444806	349016	92216	ENSMUSG00000035305	Ror1
Peak_53523	chr6	16607232	16607888	657	-2.7159	4.27994	113.234	8.00127e-10	3.20143e-08	Distal Intergenic	6	16833381	16898441	65061	290553	ENSMUSG00000029553	Tfec
Peak_783	chr1	35750115	35750653	539	-2.56999	3.96307	109	8.02509e-10	3.20911e-08	Distal Intergenic	1	36068400	36106446	38047	-317747	ENSMUSG00000045216	Hs6st1
Peak_44984	chr3	153588061	153588570	510	2.79195	3.52076	108.97	8.04447e-10	3.215e-08	Intron (uc008rtw.1/20447, intron 1 of 4)	3	153202509	153725133	522625	136563	ENSMUSG00000052544	St6galnac3
Peak_1688	chr1	66363244	66363702	459	2.39155	3.91317	108.911	8.08351e-10	3.22874e-08	Promoter (<=1kb)	1	66364655	66442583	77929	-953	ENSMUSG00000015222	Map2
Peak_20094	chr14	31681355	31681604	250	5.08658	2.47908	108.873	8.10926e-10	3.23716e-08	Distal Intergenic	14	31641057	31668197	27141	40298	ENSMUSG00000021900	Btd
Peak_8732	chr10	105788851	105789517	667	1.84784	4.72044	108.734	8.20217e-10	3.27236e-08	Intron (uc007gyo.2/216292, intron 8 of 11)	10	105763185	105841380	78196	51863	ENSMUSG00000036009	Mettl25
Peak_44954	chr3	152769598	152769952	355	4.01452	2.81708	108.698	8.22654e-10	3.28019e-08	Intron (uc012czn.1/329777, intron 11 of 11)	3	152738186	152789013	50828	31412	ENSMUSG00000039047	Pigk
Peak_40447	chr3	16733275	16733846	572	-2.83093	3.71623	108.671	8.24537e-10	3.2858e-08	Distal Intergenic	3	16183183	16217037	33855	550092	ENSMUSG00000047213	Ythdf3
Peak_3922	chr1	151829855	151830294	440	3.2888	2.93582	108.648	8.26079e-10	3.28803e-08	Distal Intergenic	1	151755374	151822328	66955	74481	ENSMUSG00000043019	Edem3
Peak_33582	chr19	17650586	17651370	785	3.14232	4.63283	124.287	8.26218e-10	3.28803e-08	Intron (uc008gxp.3/18552, intron 8 of 37)	19	17432314	17837632	405319	186262	ENSMUSG00000024713	Pcsk5
Peak_35342	chr2	21028615	21029015	401	3.01146	3.43282	108.637	8.26798e-10	3.28803e-08	Distal Intergenic	2	20968874	20970348	1475	59741	NA	Gm13375
Peak_60285	chr7	131846125	131846872	748	-3.11673	3.40985	108.634	8.27062e-10	3.28803e-08	Distal Intergenic	7	131966460	131985633	19174	-119588	ENSMUSG00000040125	Gpr26
Peak_50422	chr5	43151790	43152539	750	2.17612	4.59029	108.628	8.27469e-10	3.28803e-08	Exon (uc008xhh.2/665934, exon 8 of 8)	5	43233463	43237919	4457	-80924	ENSMUSG00000039782	Cpeb2
Peak_3238	chr1	128672207	128672694	488	3.50765	3.15558	108.549	8.32843e-10	3.30748e-08	Distal Intergenic	1	128588199	128592299	4101	-79908	ENSMUSG00000045382	Cxcr4
Peak_56114	chr6	113333044	113333764	721	2.65199	4.15231	108.541	8.33431e-10	3.30792e-08	Promoter (<=1kb)	6	113333318	113335068	1751	0	ENSMUSG00000030271	Ogg1
Peak_63900	chr8	122234057	122234393	337	3.44347	3.26771	108.506	8.35795e-10	3.3154e-08	Distal Intergenic	8	122282141	122337247	55107	-47748	ENSMUSG00000049577	Zfpm1
Peak_42027	chr3	68824257	68824940	684	-2.21596	4.3894	108.491	8.36825e-10	3.31759e-08	Distal Intergenic	3	68869586	68872163	2578	-44646	ENSMUSG00000046999	1110032F04Rik
Peak_39126	chr2	146549044	146549835	792	-2.27303	4.18946	108.421	8.41734e-10	3.33513e-08	Distal Intergenic	2	146542931	146546108	3178	6113	ENSMUSG00000085796	4933406D12Rik
Peak_55548	chr6	93819866	93820479	614	-2.19327	4.40604	108.394	8.436e-10	3.34062e-08	Intron (uc009czi.2/14924, intron 1 of 22)	6	93675453	93913690	238238	93211	ENSMUSG00000045095	Magi1
Peak_36449	chr2	57879209	57879529	321	-3.34564	2.85202	108.262	8.52802e-10	3.37513e-08	Distal Intergenic	2	57998155	58039228	41074	-118626	ENSMUSG00000026828	Galnt5
Peak_37586	chr2	96850845	96851470	626	-2.85019	3.65902	108.227	8.55276e-10	3.38298e-08	Intron (uc008lhc.2/241568, intron 3 of 7)	2	96318169	97631664	1313496	532676	ENSMUSG00000050587	Lrrc4c
Peak_33033	chr18	84874733	84875192	460	3.90889	3.05482	108.208	8.56629e-10	3.38513e-08	Intron (uc008fuw.1/109672, intron 3 of 4)	18	84851414	84879863	28450	23319	ENSMUSG00000024646	Cyb5a
Peak_27960	chr17	5711893	5712309	417	3.19606	3.29248	108.2	8.5725e-10	3.38513e-08	Intron (uc008aff.1/224454, intron 3 of 8)	17	5731472	5753811	22340	-19163	ENSMUSG00000034265	Zdhhc14
Peak_55568	chr6	94578008	94578413	406	2.6218	3.83833	108.197	8.57444e-10	3.38513e-08	Intron (uc009czr.2/67582, intron 6 of 9)	6	94606364	94606415	52	28002	ENSMUSG00000098531	Mir7041
Peak_58790	chr7	75642159	75642809	651	1.59969	5.1572	108.192	8.57774e-10	3.38513e-08	Promoter (<=1kb)	7	75643319	75704539	61221	-510	ENSMUSG00000066406	Akap13
Peak_36426	chr2	57338956	57339487	532	-2.96683	3.36715	108.163	8.59833e-10	3.39132e-08	Exon (uc008jse.2/14571, exon 7 of 17)	2	57244359	57310257	65899	94597	ENSMUSG00000026827	Gpd2
Peak_56991	chr6	140666674	140667621	948	1.80271	4.93482	108.121	8.62864e-10	3.40133e-08	Intron (uc009eok.2/11569, intron 8 of 8)	6	140626885	140655481	28597	39789	ENSMUSG00000030232	Aebp2
Peak_21647	chr14	93962130	93962929	800	-2.58103	3.79019	108.089	8.65092e-10	3.40818e-08	Distal Intergenic	14	93013700	93890669	876970	-71461	ENSMUSG00000055421	Pcdh9
Peak_1187	chr1	51650040	51650935	896	-1.72247	4.61796	108.067	8.66716e-10	3.41263e-08	Distal Intergenic	1	51755643	51758022	2380	107087	ENSMUSG00000018417	Myo1b
Peak_4820	chr1	174536774	174537662	889	-2.51867	3.84754	108.051	8.67827e-10	3.41506e-08	Exon (uc007dtd.2/54418, exon 2 of 18)	1	174501825	174822729	320905	34949	ENSMUSG00000028354	Fmn2
Peak_48393	chr4	121040803	121041700	898	2.15254	4.95137	113.487	8.71564e-10	3.42782e-08	Promoter (1-2kb)	4	121039566	121055325	15760	1237	ENSMUSG00000028626	Col9a2
Peak_65598	chr9	59695310	59695828	519	3.62215	3.61731	110.522	8.73415e-10	3.43315e-08	Distal Intergenic	9	59707637	59716424	8788	-11809	ENSMUSG00000074259	Gramd2
Peak_34322	chr19	42493337	42493894	558	2.99772	3.88186	108.259	8.75035e-10	3.43757e-08	Distal Intergenic	19	42518805	42592256	73452	-24911	ENSMUSG00000025184	R3hcc1l
Peak_38744	chr2	135101916	135102300	385	-4.17282	2.64174	107.932	8.76423e-10	3.44068e-08	Intron (uc008mnw.2/18795, intron 3 of 6)	2	135169573	135215616	46044	113316	ENSMUSG00000085247	4930545L23Rik
Peak_2828	chr1	107899235	107899636	402	-3.2364	3.62399	109.101	8.7682e-10	3.44068e-08	Distal Intergenic	1	107917259	107950947	33689	-17623	ENSMUSG00000100457	D830032E09Rik
Peak_64422	chr9	16478009	16478388	380	2.92506	3.04511	107.914	8.77766e-10	3.44243e-08	Distal Intergenic	9	15910193	16378231	468039	-99778	ENSMUSG00000074505	Fat3
Peak_17733	chr13	63691898	63692542	645	2.73037	3.98695	107.905	8.78439e-10	3.44312e-08	Intron (uc007qxz.2/75522, intron 4 of 4)	13	63675756	63734298	58543	41756	ENSMUSG00000113825	1700024I08Rik
Peak_27828	chr16	95668450	95668966	517	-2.67662	3.2535	107.762	8.88933e-10	3.48228e-08	Distal Intergenic	16	95702407	95721049	18643	-33441	ENSMUSG00000022895	Ets2
Peak_54913	chr6	70903815	70904231	417	3.67896	3.26197	107.646	8.97509e-10	3.51389e-08	Exon (uc009cgb.2/13666, exon 17 of 17)	6	70913089	70918922	5834	14691	ENSMUSG00000051896	Tex37
Peak_32994	chr18	84230212	84230985	774	-2.27303	3.72869	107.614	8.99866e-10	3.52113e-08	Intron (uc008fuo.2/240476, intron 8 of 8)	18	84088158	84097514	9357	142054	ENSMUSG00000049090	Zadh2
Peak_21330	chr14	76724191	76725012	822	4.16679	4.26673	124.79	9.00429e-10	3.52134e-08	Distal Intergenic	14	76677568	76687108	9541	46623	ENSMUSG00000101009	1700108F19Rik
Peak_39760	chr2	166691678	166692533	856	2.31938	4.02899	107.574	9.0288e-10	3.52816e-08	Intron (uc008nyn.1/277360, intron 1 of 39)	2	166566345	166713832	147488	21299	ENSMUSG00000039621	Prex1
Peak_66163	chr9	80380111	80380567	457	-3.45714	3.26983	107.57	9.03191e-10	3.52816e-08	Intron (uc009qvi.2/63859, intron 10 of 16)	9	80313330	80465438	152109	84871	ENSMUSG00000032343	Impg1
Peak_19337	chr13	115575001	115575802	802	-2.76308	4.87244	124.699	9.05873e-10	3.53663e-08	Distal Intergenic	13	115034064	115101964	67901	-473037	ENSMUSG00000042284	Itga1
Peak_8799	chr10	107860121	107860826	706	-2.50682	3.60673	107.487	9.09447e-10	3.54859e-08	Intron (uc011xnc.1/628870, intron 21 of 57)	10	107762310	107912134	149825	51308	ENSMUSG00000091455	Otogl
Peak_54174	chr6	39345353	39345882	530	-3.28833	3.06134	107.476	9.10249e-10	3.54912e-08	Intron (uc009blk.2/72144, intron 12 of 15)	6	39334771	39372930	38160	27048	ENSMUSG00000029924	Slc37a3
Peak_36424	chr2	57283686	57284273	588	-2.8041	3.4326	107.47	9.10715e-10	3.54912e-08	Intron (uc008jse.2/14571, intron 2 of 16)	2	57244359	57310257	65899	39327	ENSMUSG00000026827	Gpd2
Peak_667	chr1	32467031	32467575	545	2.95829	3.4549	107.459	9.11591e-10	3.54912e-08	Intron (uc007anp.1/170771, intron 4 of 8)	1	32519563	32520999	1437	53424	ENSMUSG00000091318	Gm9839
Peak_37773	chr2	104454921	104455297	377	4.739	3.03348	109.771	9.12274e-10	3.54912e-08	Intron (uc008lju.2/15259, intron 2 of 15)	2	104428861	104428940	80	-25981	ENSMUSG00000084516	Mir1902
Peak_3517	chr1	135435884	135436298	415	-2.98575	3.03364	107.447	9.12458e-10	3.54912e-08	3' UTR	1	135406759	135430491	23733	-5393	ENSMUSG00000041879	Ipo9
Peak_45858	chr4	28227587	28228216	630	3.18793	3.32106	107.441	9.12942e-10	3.54912e-08	Distal Intergenic	4	28813131	28873801	60671	-584915	ENSMUSG00000028289	Epha7
Peak_54591	chr6	55398895	55399351	457	-2.49472	3.70897	107.438	9.13172e-10	3.54912e-08	Promoter (2-3kb)	6	55396887	55412285	15399	2008	ENSMUSG00000108228	6430584L05Rik
Peak_18481	chr13	93399730	93400218	489	2.86996	3.44741	107.396	9.16332e-10	3.5594e-08	Intron (uc007rlc.3/26556, intron 9 of 9)	13	93453375	93464717	11343	64499	ENSMUSG00000021690	Jmy
Peak_14041	chr12	41727082	41727918	837	-2.4139	5.23586	124.783	9.17489e-10	3.56189e-08	Intron (uc029rsc.2/93757, intron 6 of 6)	12	41451668	41486057	34390	-241025	ENSMUSG00000036295	Lrrn3
Peak_45429	chr4	10972993	10973537	545	1.9123	5.07764	110.517	9.19271e-10	3.56681e-08	Distal Intergenic	4	10988662	11007619	18958	34082	ENSMUSG00000049969	Plekhf2
Peak_43048	chr3	101903980	101904285	306	4.18589	2.53684	107.326	9.21723e-10	3.57432e-08	Intron (uc008qrl.2/242126, intron 2 of 11)	3	101855771	101896870	41100	-7110	ENSMUSG00000033147	Slc22a15
Peak_24915	chr15	91028408	91028886	479	2.63011	3.69175	107.286	9.24815e-10	3.58431e-08	Intron (uc007xhs.3/16564, intron 1 of 36)	15	90933275	91049951	116677	21065	ENSMUSG00000022629	Kif21a
Peak_15460	chr12	98478055	98478548	494	3.01652	3.72211	107.277	9.25472e-10	3.58485e-08	Intron (uc007oqg.2/72258, intron 4 of 6)	12	98489797	98532057	42261	53509	ENSMUSG00000033854	Kcnk10
Peak_488	chr1	22848083	22848546	464	-3.43445	3.42272	108.192	9.26115e-10	3.58533e-08	Distal Intergenic	1	22593276	22805724	212449	-42359	ENSMUSG00000041670	Rims1
Peak_12538	chr11	108204900	108205268	369	-3.60043	2.89845	107.229	9.2916e-10	3.59511e-08	Intron (uc011ygr.1/18750, intron 2 of 16)	11	107933387	108343888	410502	138620	ENSMUSG00000050965	Prkca
Peak_55961	chr6	108132284	108132870	587	2.98999	3.25597	107.183	9.32775e-10	3.60708e-08	Intron (uc009ddf.2/58911, intron 7 of 8)	6	108107021	108185583	78563	52713	ENSMUSG00000030101	Sumf1
Peak_60702	chr8	8231204	8232316	1113	-2.31138	4.46318	108.241	9.35827e-10	3.61686e-08	Intron (uc009kuc.1/uc009kuc.1, intron 2 of 5)	8	8617439	8660773	43335	428457	ENSMUSG00000001300	Efnb2
Peak_37282	chr2	83740385	83741039	655	2.68366	3.93729	107.127	9.37103e-10	3.61932e-08	3' UTR	2	83724397	83806917	82521	15988	ENSMUSG00000027087	Itgav
Peak_31077	chr18	25684956	25685365	410	-2.4113	3.52613	107.122	9.3751e-10	3.61932e-08	Intron (uc008ehk.2/108013, intron 1 of 11)	18	25477620	25753983	276364	68618	ENSMUSG00000024268	Celf4
Peak_58482	chr7	66399899	66400255	357	3.59363	2.89312	107.099	9.39315e-10	3.62387e-08	Exon (uc009hhi.2/56847, exon 11 of 13)	7	66342622	66388341	45720	-11558	ENSMUSG00000015133	Lrrk1
Peak_24021	chr15	64098569	64099227	659	3.85344	3.60725	111.407	9.39735e-10	3.62387e-08	Intron (uc007vzh.2/13196, intron 26 of 28)	15	63929094	64060448	131355	-38121	ENSMUSG00000022378	Fam49b
Peak_33945	chr19	29265129	29266041	913	2.23948	4.12865	107.047	9.43406e-10	3.636e-08	Intron (uc008hdb.2/16452, intron 3 of 24)	19	29251803	29313080	61278	13326	ENSMUSG00000024789	Jak2
Peak_32082	chr18	57704106	57704570	465	-2.73492	3.67562	107.038	9.44127e-10	3.63675e-08	Intron (uc008ezg.3/75444, intron 6 of 6)	18	57632079	57638585	6507	-65521	NA	2210409D07Rik
Peak_14460	chr12	56223005	56223456	452	3.40977	3.14036	106.948	9.51248e-10	3.66214e-08	Distal Intergenic	12	56253243	56266381	13139	-29787	ENSMUSG00000112164	Gm19990
Peak_40044	chr2	178326999	178327916	918	-1.50647	5.43509	106.94	9.51908e-10	3.66265e-08	Intron (uc008ohj.2/74189, intron 8 of 12)	2	178345296	178375044	29749	47128	ENSMUSG00000060445	Sycp2
Peak_12841	chr11	117320098	117320479	382	3.30422	2.9385	106.773	9.65267e-10	3.71199e-08	Intron (uc007mnd.2/53860, intron 3 of 11)	11	117331715	117362325	30611	-11236	ENSMUSG00000059248	Sept9
Peak_9137	chr10	117725369	117725683	315	4.45036	2.74576	106.763	9.66063e-10	3.71299e-08	Distal Intergenic	10	117688875	117710758	21884	-14611	ENSMUSG00000020184	Mdm2
Peak_21888	chr14	103613609	103614287	679	-3.02594	3.60115	106.755	9.66753e-10	3.71358e-08	Distal Intergenic	14	103650243	103704799	54557	-35956	ENSMUSG00000055717	Slain1
Peak_9612	chr11	3983240	3983745	506	2.88246	3.64293	106.692	9.71796e-10	3.73088e-08	Promoter (<=1kb)	11	3983636	3999328	15693	0	ENSMUSG00000049721	Gal3st1
Peak_54862	chr6	67010354	67011143	790	2.1321	4.47156	106.637	9.76274e-10	3.74599e-08	Intron (uc009cew.2/14701, intron 3 of 4)	6	67036599	67080652	44054	-25456	ENSMUSG00000087231	E230016M11Rik
Peak_6413	chr10	28586637	28587180	544	3.11065	4.02612	110.682	9.77074e-10	3.74699e-08	Exon (uc007esn.1/19272, exon 27 of 32)	10	28668360	28739306	70947	-81180	ENSMUSG00000049109	Themis
Peak_22601	chr15	9094349	9094809	461	2.35111	3.902	106.621	9.77628e-10	3.74703e-08	Intron (uc033gta.1/68646, intron 6 of 11)	15	9071260	9110496	39237	23089	ENSMUSG00000022253	Nadk2
Peak_23681	chr15	53274560	53274985	426	2.65939	3.31076	106.585	9.806e-10	3.7556e-08	Exon (uc057bgb.1/uc057bgb.1, exon 1 of 1)	15	53068261	53346183	277923	71198	ENSMUSG00000061731	Ext1
Peak_65558	chr9	58112359	58113234	876	-2.3409	4.05429	106.58	9.80947e-10	3.7556e-08	Intron (uc009pwf.1/20897, intron 1 of 4)	9	58028674	58118823	90150	5589	ENSMUSG00000037716	Ccdc33
Peak_6000	chr10	18457861	18458571	711	1.83679	4.82468	106.556	9.82926e-10	3.76109e-08	Intron (uc007emh.1/215819, intron 1 of 3)	10	18469981	18533891	63911	-11410	ENSMUSG00000039835	Nhsl1
Peak_37565	chr2	94925816	94926202	387	2.92384	3.22276	106.546	9.8381e-10	3.76239e-08	Distal Intergenic	2	94411727	94438186	26460	-487630	ENSMUSG00000027193	Api5
Peak_21901	chr14	103777885	103779468	1584	1.61912	6.62685	122.588	9.84804e-10	3.76412e-08	Exon (uc007uwv.1/uc007uwv.1, exon 1 of 2)	14	103814615	103843701	29087	64233	ENSMUSG00000022122	Ednrb
Peak_62529	chr8	73142562	73143113	552	-2.47954	4.09127	106.51	9.86736e-10	3.76942e-08	Intron (uc009mgs.2/16795, intron 2 of 14)	8	73045064	73098953	53890	-43609	ENSMUSG00000004383	Large1
Peak_44838	chr3	149134340	149134913	574	3.00913	3.54405	106.484	9.8895e-10	3.77576e-08	Distal Intergenic	3	149274737	149279980	5244	-139824	NA	Gm1653
Peak_46959	chr4	69628934	69629311	378	3.11849	3.65286	106.477	9.89486e-10	3.77576e-08	Distal Intergenic	4	68795954	68954397	158444	-674537	ENSMUSG00000028351	Brinp1
Peak_43367	chr3	109431252	109431596	345	2.60407	3.66145	106.467	9.9034e-10	3.77693e-08	Intron (uc008raf.1/57257, intron 2 of 16)	3	109340683	109685694	345012	90569	ENSMUSG00000033721	Vav3
Peak_9139	chr10	117741533	117741805	273	4.33833	2.84366	106.446	9.92044e-10	3.77986e-08	Intron (uc007hdn.1/215436, intron 2 of 4)	10	117733678	117746358	12681	4553	ENSMUSG00000060181	Slc35e3
Peak_58677	chr7	72998333	72998927	595	-2.57514	3.53425	106.444	9.922e-10	3.77986e-08	Distal Intergenic	7	73097752	73102068	4317	103141	ENSMUSG00000108383	Gm6567
Peak_41436	chr3	52196144	52197114	971	-1.64895	4.70825	106.357	9.99468e-10	3.80546e-08	Distal Intergenic	3	52268337	52350109	81773	-71223	ENSMUSG00000044167	Foxo1
Peak_29812	chr17	75186821	75187326	506	2.93744	3.35574	106.315	1.00304e-09	3.81697e-08	Intron (uc008dom.2/268977, intron 5 of 33)	17	75178810	75392967	214158	8011	ENSMUSG00000001870	Ltbp1
Peak_30692	chr18	13334935	13335146	212	4.44475	2.40738	106.271	1.00679e-09	3.82876e-08	Distal Intergenic	18	13006990	13022882	15893	327945	ENSMUSG00000037346	Hrh4
Peak_14296	chr12	51736784	51737227	444	-3.10921	2.7136	106.265	1.00725e-09	3.82876e-08	Intron (uc007nmw.2/11782, intron 5 of 5)	12	51758040	51765231	7192	28004	ENSMUSG00000035247	Hectd1
Peak_59277	chr7	95019882	95020606	725	-3.17626	3.23844	106.24	1.00938e-09	3.83477e-08	Distal Intergenic	7	96171244	96911092	739849	-1150638	ENSMUSG00000048078	Tenm4
Peak_68013	chrX	60742904	60743750	847	2.34067	3.9302	106.181	1.01441e-09	3.85176e-08	Intron (uc009tie.1/uc009tie.1, intron 9 of 14)	20	60891366	60893430	2065	149680	ENSMUSG00000045179	Sox3
Peak_44488	chr3	141476508	141476924	417	3.08826	2.94726	106.151	1.01692e-09	3.85915e-08	Intron (uc008roc.1/22253, intron 1 of 1)	3	141465564	141834924	369361	10944	ENSMUSG00000059921	Unc5c
Peak_22336	chr14	121198864	121199779	916	2.11231	5.17519	115.259	1.01761e-09	3.85968e-08	Intron (uc007vaa.1/223254, intron 2 of 26)	14	121035574	121283726	248153	163290	ENSMUSG00000025555	Farp1
Peak_47584	chr4	94186985	94187401	417	-3.04712	3.56531	106.107	1.02072e-09	3.86935e-08	Distal Intergenic	4	94500079	94556796	56718	369395	ENSMUSG00000028578	Caap1
Peak_4446	chr1	165609800	165610975	1176	1.82642	4.58165	106.099	1.02138e-09	3.86973e-08	Intron (uc007djh.1/68481, intron 1 of 5)	1	165592181	165601864	9684	-7936	ENSMUSG00000026566	Mpzl1
Peak_37909	chr2	107729485	107729822	338	2.90244	3.29949	106.064	1.02439e-09	3.87901e-08	Distal Intergenic	2	107290589	107298504	7916	438896	ENSMUSG00000042604	Kcna4
Peak_64111	chr8	128483208	128483635	428	3.76727	2.87921	106.055	1.02516e-09	3.87981e-08	Intron (uc009nzt.2/18186, intron 11 of 16)	8	128359241	128359320	80	123967	ENSMUSG00000084523	Mir1903
Peak_7529	chr10	69751503	69751895	393	3.25281	3.03601	106.044	1.02611e-09	3.88126e-08	Intron (uc007fmt.1/11735, intron 1 of 6)	10	69785514	69810465	24952	-33619	ENSMUSG00000069601	Ank3
Peak_53117	chr5	151218685	151219211	527	2.41354	4.06784	105.98	1.03167e-09	3.90016e-08	Distal Intergenic	5	151073044	151190193	117150	-28492	ENSMUSG00000016128	Stard13
Peak_58399	chr7	64295983	64296956	974	2.06084	4.31726	105.873	1.041e-09	3.93176e-08	Intron (uc009hgc.1/233315, intron 2 of 4)	7	64287670	64340806	53137	8313	ENSMUSG00000030522	Mtmr10
Peak_14517	chr12	58088600	58088931	332	2.91604	3.33425	105.871	1.04116e-09	3.93176e-08	Distal Intergenic	12	58211804	58216036	4233	-122873	ENSMUSG00000035431	Sstr1
Peak_12017	chr11	90807305	90807809	505	-2.68395	3.10592	105.851	1.04295e-09	3.93638e-08	Promoter (2-3kb)	11	90804691	90895152	90462	2614	ENSMUSG00000085940	4930405D11Rik
Peak_28515	chr17	31355813	31356477	665	3.4448	3.82172	109.834	1.04511e-09	3.94048e-08	Distal Intergenic	17	31386234	31476309	90076	-29757	ENSMUSG00000041119	Pde9a
Peak_9224	chr10	120417109	120417766	658	2.73817	3.56019	105.826	1.04518e-09	3.94048e-08	Intron (uc007hfb.1/15364, intron 3 of 4)	10	120389523	120392793	3271	27586	ENSMUSG00000090191	9230105E05Rik
Peak_4796	chr1	173335996	173336583	588	2.35567	4.02988	105.745	1.05235e-09	3.96536e-08	Promoter (2-3kb)	1	173331886	173333503	1618	-2493	ENSMUSG00000037872	Ackr1
Peak_32750	chr18	77181172	77181827	656	-2.2144	3.88375	105.672	1.05885e-09	3.98767e-08	Distal Intergenic	18	77185847	77255450	69604	-4020	ENSMUSG00000025425	St8sia5
Peak_21731	chr14	98810268	98811106	839	-2.03188	5.0351	112.072	1.06386e-09	4.00312e-08	Distal Intergenic	14	99034544	99046136	11593	235030	ENSMUSG00000033186	Mzt1
Peak_62328	chr8	68705682	68706167	486	2.74596	3.68297	105.613	1.06411e-09	4.00312e-08	Intron (uc009lwf.3/234356, intron 1 of 9)	8	68356781	68735146	378366	28979	ENSMUSG00000036356	Csgalnact1
Peak_57912	chr7	40873384	40873795	412	-3.33027	2.99074	105.578	1.06727e-09	4.01072e-08	Intron (uc009glg.2/320210, intron 4 of 4)	7	40849153	40898324	49172	24529	ENSMUSG00000100600	A230077H06Rik
Peak_29015	chr17	49043805	49044614	810	-2.14005	4.35074	105.578	1.06728e-09	4.01072e-08	Intron (uc008cyd.2/70530, intron 1 of 2)	17	49112264	49113533	1270	68919	ENSMUSG00000101012	1700008K24Rik
Peak_13532	chr12	26930150	26930867	718	-2.98825	3.18578	105.559	1.06897e-09	4.01487e-08	Distal Intergenic	12	27090237	27114995	24759	184128	ENSMUSG00000094002	Gm20187
Peak_66158	chr9	80272854	80273626	773	-2.69065	3.82083	105.543	1.07042e-09	4.01632e-08	Intron (uc009qvg.2/17920, intron 18 of 32)	9	80281461	80311729	30269	-7835	ENSMUSG00000033577	Myo6
Peak_17005	chr13	34806508	34807095	588	3.05249	4.48455	117.406	1.07052e-09	4.01632e-08	Distal Intergenic	13	34739642	34747622	7981	66866	ENSMUSG00000038246	Fam50b
Peak_56734	chr6	134149562	134149967	406	3.2867	3.47304	105.485	1.07568e-09	4.03352e-08	Intron (uc009eke.2/14011, intron 2 of 7)	6	134035700	134270147	234448	113862	ENSMUSG00000030199	Etv6
Peak_16168	chr13	8417485	8417936	452	3.82864	3.28106	106.144	1.07687e-09	4.03579e-08	Intron (uc007pkf.2/94191, intron 1 of 9)	13	8202866	8768762	565897	214619	ENSMUSG00000052551	Adarb2
Peak_53753	chr6	24538470	24538986	517	-3.42814	3.54723	108.506	1.08024e-09	4.04622e-08	Intron (uc009bbt.2/78910, intron 1 of 9)	6	24528144	24573164	45021	10326	ENSMUSG00000029685	Asb15
Peak_34724	chr19	58076939	58077988	1050	-2.07756	3.9561	105.416	1.08193e-09	4.04902e-08	Intron (uc008iai.2/226255, intron 28 of 28)	19	58051167	58051236	70	25772	ENSMUSG00000093757	Mir5623
Peak_16188	chr13	9065881	9066457	577	2.62282	3.43193	105.414	1.08216e-09	4.04902e-08	Distal Intergenic	13	9093881	9174451	80571	-27424	ENSMUSG00000033499	Larp4b
Peak_67780	chrX	38696804	38697143	340	3.91884	2.68915	105.407	1.08282e-09	4.0493e-08	Distal Intergenic	20	38630783	38635143	4361	-61661	ENSMUSG00000048970	C1galt1c1
Peak_4209	chr1	159587786	159588580	795	3.88924	3.89488	114.354	1.09461e-09	4.0912e-08	Intron (uc007dea.2/21960, intron 1 of 22)	1	159523769	159924922	401154	64017	ENSMUSG00000015829	Tnr
Peak_63817	chr8	120019355	120019902	548	3.89261	3.67046	110.273	1.09754e-09	4.09993e-08	Intron (uc012glu.2/78892, intron 6 of 14)	8	120002726	120052794	50069	16629	ENSMUSG00000031825	Crispld2
Peak_39268	chr2	150847473	150847975	503	2.53157	4.24058	105.6	1.09819e-09	4.10015e-08	Intron (uc008muo.2/76192, intron 3 of 12)	2	150834279	150839849	5571	-7624	ENSMUSG00000032046	Abhd12
Peak_56878	chr6	137471987	137472568	582	2.21033	4.28298	105.232	1.0989e-09	4.1006e-08	Distal Intergenic	6	137477245	137519895	42651	47327	ENSMUSG00000015766	Eps8
Peak_11735	chr11	79650282	79650824	543	3.54871	3.99593	112.714	1.1052e-09	4.12187e-08	Intron (uc007kku.1/268451, intron 3 of 14)	11	79670373	79675086	4714	24262	ENSMUSG00000086569	Rab11fip4os2
Peak_54073	chr6	36784704	36785366	663	2.31576	4.58213	107.551	1.11065e-09	4.13997e-08	Intron (uc009bja.1/19242, intron 1 of 4)	6	36715663	36811361	95699	25995	ENSMUSG00000029838	Ptn
Peak_2426	chr1	89400451	89401345	895	1.94279	4.44468	105.072	1.11393e-09	4.14995e-08	Intron (uc029qrn.1/77331, intron 1 of 2)	1	89360344	89406133	45790	4788	ENSMUSG00000099938	C030007H22Rik
Peak_51035	chr5	66889221	66889828	608	2.18253	4.61516	105.673	1.12025e-09	4.17126e-08	Intron (uc008xph.1/77569, intron 3 of 25)	5	66968416	66974915	6500	-78588	ENSMUSG00000037736	Limch1
Peak_1613	chr1	63899663	63900077	415	-3.42798	2.72536	104.997	1.12101e-09	4.17183e-08	Distal Intergenic	1	63964727	63968999	4273	-64650	ENSMUSG00000044689	Gm13749
Peak_52629	chr5	132579729	132580335	607	2.95652	3.74123	104.957	1.1249e-09	4.18409e-08	Distal Intergenic	5	132049730	132542343	492614	-37386	ENSMUSG00000029673	Auts2
Peak_5118	chr1	183043177	183043619	443	3.10496	3.61153	104.929	1.12759e-09	4.19001e-08	Distal Intergenic	1	182954788	182976044	21257	88389	ENSMUSG00000079164	Tlr5
Peak_50425	chr5	43290514	43291065	552	2.83259	3.56654	104.927	1.12771e-09	4.19001e-08	Distal Intergenic	5	43151686	43235354	83669	-55160	ENSMUSG00000085720	Gm7854
Peak_10772	chr11	44882612	44883328	717	-3.43899	3.44655	106.384	1.12832e-09	4.19003e-08	Intron (uc007ink.2/13591, intron 7 of 15)	11	45102866	45116928	14063	233600	ENSMUSG00000084773	Gm12159
Peak_6401	chr10	28128065	28128786	722	2.38309	3.78657	104.903	1.13002e-09	4.1941e-08	Intron (uc007esj.1/19272, intron 1 of 2)	10	28074820	28597397	522578	53245	ENSMUSG00000019889	Ptprk
Peak_23344	chr15	37722924	37723484	561	2.87717	3.78268	104.893	1.13098e-09	4.1954e-08	Intron (uc011zsg.1/52589, intron 1 of 6)	15	37619769	37734636	114868	11152	ENSMUSG00000051359	Ncald
Peak_7720	chr10	76963791	76964166	376	-2.53694	3.39444	104.856	1.13457e-09	4.20534e-08	Promoter (1-2kb)	10	76761854	76961947	200094	-1844	ENSMUSG00000001120	Pcbp3
Peak_13289	chr12	13167097	13167614	518	2.94885	3.45989	104.853	1.13487e-09	4.20534e-08	Distal Intergenic	12	13219307	13249174	29868	81560	ENSMUSG00000037149	Ddx1
Peak_44473	chr3	140671073	140671604	532	-3.21854	3.65913	107.265	1.137e-09	4.21047e-08	Distal Intergenic	3	141210004	141212355	2352	540751	ENSMUSG00000047674	Pdha2
Peak_24552	chr15	79151885	79152239	355	2.72643	3.43153	104.821	1.13798e-09	4.21047e-08	Downstream (2-3kb)	15	79141325	79151774	10450	10560	ENSMUSG00000033020	Polr2f
Peak_32498	chr18	68444189	68444647	459	2.84732	3.95867	105.335	1.1381e-09	4.21047e-08	Distal Intergenic	18	68406899	68429320	22422	-14869	ENSMUSG00000045569	Mc2r
Peak_8636	chr10	102244578	102245012	435	-2.66441	3.612	104.813	1.13869e-09	4.21047e-08	Exon (uc007gyb.2/67569, exon 4 of 5)	10	102159079	102391468	232390	85499	ENSMUSG00000019888	Mgat4c
Peak_15607	chr12	102511165	102511682	518	-2.8712	3.14135	104.803	1.13966e-09	4.21164e-08	Distal Intergenic	12	102469910	102497907	27998	41255	ENSMUSG00000021192	Golga5
Peak_21632	chr14	93543486	93544562	1077	1.98864	5.52254	117.496	1.14022e-09	4.21164e-08	Intron (uc007uum.2/211712, intron 2 of 3)	14	93013700	93888888	875189	344326	ENSMUSG00000055421	Pcdh9
Peak_9418	chr10	126827958	126828976	1019	1.83932	5.24746	108.71	1.14338e-09	4.22104e-08	Distal Intergenic	10	126788851	126793710	4860	-34248	ENSMUSG00000112832	4930484H19Rik
Peak_3495	chr1	134866213	134866820	608	-2.31425	3.62816	104.67	1.1526e-09	4.25181e-08	Intron (uc007csm.1/329251, intron 12 of 24)	1	134759067	134846420	87354	-19793	ENSMUSG00000073557	Ppp1r12b
Peak_14779	chr12	72235724	72236178	455	-2.15706	3.76179	104.657	1.15388e-09	4.25181e-08	Promoter (<=1kb)	12	72211749	72235746	23998	0	ENSMUSG00000021087	Rtn1
Peak_44481	chr3	141196976	141197771	796	-2.90596	4.24921	112.191	1.15414e-09	4.25181e-08	Distal Intergenic	3	141210004	141212355	2352	14584	ENSMUSG00000047674	Pdha2
Peak_39759	chr2	166682716	166683295	580	2.45551	3.89998	104.654	1.15417e-09	4.25181e-08	Intron (uc008nyn.1/277360, intron 1 of 39)	2	166566345	166713832	147488	30537	ENSMUSG00000039621	Prex1
Peak_46545	chr4	55125219	55125835	617	-2.18679	4.07438	104.645	1.15504e-09	4.25276e-08	Distal Intergenic	4	54947945	55083563	135619	177274	ENSMUSG00000060206	Zfp462
Peak_332	chr1	17181679	17182170	492	3.07504	2.94268	104.599	1.15966e-09	4.26751e-08	Distal Intergenic	1	17145373	17164270	18898	36306	ENSMUSG00000025777	Gdap1
Peak_58723	chr7	73746732	73747343	612	2.34714	4.27711	104.56	1.16352e-09	4.27864e-08	Intron (uc009hrf.2/100038347, intron 1 of 2)	7	73740307	73776919	36613	6425	ENSMUSG00000078670	Fam174b
Peak_18881	chr13	104695116	104695879	764	2.0834	4.00332	104.555	1.16392e-09	4.27864e-08	Intron (uc007rtj.1/67285, intron 11 of 13)	13	104631327	104816953	185627	121074	ENSMUSG00000021715	Cwc27
Peak_10238	chr11	26342871	26343326	456	-3.61331	3.29946	105.752	1.16541e-09	4.28184e-08	Distal Intergenic	11	26387084	26469124	82041	-43758	ENSMUSG00000004018	Fancl
Peak_19778	chr14	17731052	17731534	483	2.86664	3.5066	104.534	1.16605e-09	4.2819e-08	Intron (uc007shk.2/21834, intron 1 of 9)	14	17660960	18038088	377129	70092	ENSMUSG00000021779	Thrb
Peak_997	chr1	41886136	41886511	376	2.83668	3.3522	104.491	1.17036e-09	4.29332e-08	Distal Intergenic	1	41167560	41181252	13693	-704884	ENSMUSG00000104072	4930448I06Rik
Peak_44341	chr3	137482759	137483453	695	-2.89805	3.88049	105.944	1.1704e-09	4.29332e-08	Distal Intergenic	3	137550045	137552622	2578	69169	ENSMUSG00000055138	Gm4861
Peak_22808	chr15	18820178	18820634	457	1.83122	4.36438	104.479	1.17156e-09	4.29532e-08	Promoter (<=1kb)	15	18820329	19014236	193908	0	ENSMUSG00000022321	Cdh10
Peak_49818	chr5	22839721	22840297	577	3.80508	3.65394	109.83	1.17261e-09	4.29687e-08	Intron (uc008wpv.2/269629, intron 1 of 2)	5	22738911	22746884	7974	-92837	ENSMUSG00000105076	A930003O13Rik
Peak_5138	chr1	183573802	183574312	511	2.70903	3.79921	104.456	1.17382e-09	4.29905e-08	Distal Intergenic	1	183419248	183437053	17806	154554	ENSMUSG00000053461	Hhipl2
Peak_1202	chr1	51947624	51947976	353	-3.7353	2.4633	104.447	1.17473e-09	4.3001e-08	Distal Intergenic	1	51862645	51915978	53334	-31646	ENSMUSG00000018417	Myo1b
Peak_64175	chr9	5604062	5604583	522	-3.1205	3.30126	104.407	1.17877e-09	4.31261e-08	Distal Intergenic	9	5345476	5373034	27559	258586	ENSMUSG00000025887	Casp12
Peak_39538	chr2	158556741	158557200	460	-2.82084	3.74905	104.385	1.18091e-09	4.31814e-08	Distal Intergenic	2	158512796	158550628	37833	43945	ENSMUSG00000074625	Arhgap40
Peak_16757	chr13	26171898	26172440	543	-3.35967	3.64123	108.268	1.18478e-09	4.33001e-08	Distal Intergenic	13	26283159	26312406	29248	139966	ENSMUSG00000084811	1700092E19Rik
Peak_38910	chr2	139711603	139712341	739	1.9656	4.53293	104.339	1.18559e-09	4.3307e-08	Intron (uc008mpf.2/319909, intron 1 of 5)	2	139678178	139758581	80404	33425	ENSMUSG00000074766	Ism1
Peak_8889	chr10	110372956	110373794	839	-2.46586	4.10673	104.304	1.18914e-09	4.3391e-08	Distal Intergenic	10	110600650	110615961	15312	-226856	ENSMUSG00000112398	9230102K24Rik
Peak_29167	chr17	53551388	53552109	722	-2.43039	3.80478	104.304	1.18915e-09	4.3391e-08	Distal Intergenic	17	53507460	53539451	31992	-11937	ENSMUSG00000044957	Pp2d1
Peak_63118	chr8	92881224	92881717	494	3.44638	3.53092	104.806	1.19158e-09	4.34568e-08	Intron (uc009mug.1/270084, intron 8 of 13)	8	92901395	92902409	1015	-19678	ENSMUSG00000078144	Capns2
Peak_57096	chr6	143261011	143261630	620	2.18943	4.42058	104.232	1.19648e-09	4.36128e-08	Intron (uc009eqh.2/52285, intron 3 of 3)	6	143245888	143297879	51992	15123	NA	D6Ertd474e
Peak_2202	chr1	82802618	82802955	338	-3.53605	2.53192	104.197	1.20009e-09	4.37212e-08	Distal Intergenic	1	82756649	82768456	11808	-34162	ENSMUSG00000026149	Tm4sf20
Peak_67386	chr9	121532579	121532931	353	-3.90305	2.5901	104.188	1.20093e-09	4.37287e-08	Distal Intergenic	9	121489824	121495694	5871	-36885	ENSMUSG00000032532	Cck
Peak_51537	chr5	89024905	89025303	399	3.03233	3.39897	104.171	1.20268e-09	4.3769e-08	Promoter (2-3kb)	5	89028134	89239656	211523	-2831	ENSMUSG00000060961	Slc4a4
Peak_46783	chr4	63253748	63254152	405	2.93426	3.8692	104.456	1.2033e-09	4.3769e-08	Promoter (2-3kb)	4	63256851	63256932	82	-2699	ENSMUSG00000070102	Mir455
Peak_29485	chr17	66145790	66146197	408	3.78441	2.70919	104.157	1.20415e-09	4.3777e-08	Intron (uc008dha.1/320209, intron 17 of 25)	17	66126173	66152168	25996	19617	ENSMUSG00000035842	Ddx11
Peak_22564	chr15	7880069	7880510	442	3.08587	3.10308	104.121	1.20789e-09	4.389e-08	Intron (uc007veg.1/545085, intron 17 of 17)	15	7815550	7837580	22031	64519	ENSMUSG00000022144	Gdnf
Peak_21758	chr14	99631090	99631536	447	2.13476	4.08184	104.11	1.20896e-09	4.39056e-08	Distal Intergenic	14	99298691	99313409	14719	332399	ENSMUSG00000005148	Klf5
Peak_49758	chr5	20795967	20796450	484	2.81517	3.54245	104.095	1.21053e-09	4.39397e-08	Intron (uc008wnz.2/68770, intron 7 of 17)	5	20758664	20774275	15612	-21692	ENSMUSG00000039987	Phtf2
Peak_2907	chr1	118398712	118399296	585	2.43304	3.58813	104.077	1.21237e-09	4.39835e-08	Intron (uc007cid.1/76707, intron 1 of 11)	1	118389058	118609462	220405	9654	ENSMUSG00000064302	Clasp1
Peak_21847	chr14	102575791	102576398	608	3.13284	3.92888	107.949	1.21393e-09	4.40169e-08	Distal Intergenic	14	102976581	102982637	6057	406239	ENSMUSG00000098557	Kctd12
Peak_14521	chr12	58210464	58210663	200	3.23935	3.40442	104.049	1.21535e-09	4.40452e-08	Promoter (1-2kb)	12	58211804	58216036	4233	-1141	ENSMUSG00000035431	Sstr1
Peak_14024	chr12	41351173	41351748	576	-2.73781	3.69619	104.028	1.21746e-09	4.40731e-08	Intron (uc029rsc.2/93757, intron 4 of 6)	12	41451668	41486057	34390	134309	ENSMUSG00000036295	Lrrn3
Peak_42425	chr3	84355977	84356642	666	2.62754	3.89739	104.028	1.21748e-09	4.40731e-08	Intron (uc029umw.1/75309, intron 3 of 3)	3	84349376	84379921	30546	23279	ENSMUSG00000104004	4930565D16Rik
Peak_60742	chr8	9466321	9466704	384	2.56371	3.63062	104.014	1.21898e-09	4.40731e-08	Intron (uc009kuj.1/270028, intron 1 of 2)	8	9206010	9323369	117360	-142952	ENSMUSG00000079157	Fam155a
Peak_32410	chr18	66022650	66023540	891	-2.49413	3.50625	104.013	1.21911e-09	4.40731e-08	Distal Intergenic	18	65983687	66002635	18949	-20015	ENSMUSG00000041891	Lman1
Peak_67147	chr9	112496004	112496534	531	-3.39811	3.25919	104.011	1.2193e-09	4.40731e-08	Distal Intergenic	9	112256574	112348925	92352	239430	ENSMUSG00000087038	2900079G21Rik
Peak_27160	chr16	71678389	71678740	352	-2.72565	3.1433	103.968	1.22381e-09	4.42128e-08	Distal Intergenic	16	71249904	71267176	17273	428485	NA	4930567J20Rik
Peak_27629	chr16	89863204	89863636	433	3.11334	3.25035	103.946	1.22605e-09	4.42707e-08	Intron (uc007zvu.2/21844, intron 8 of 27)	16	89787111	89837875	50765	-25329	ENSMUSG00000002489	Tiam1
Peak_5078	chr1	181653514	181653950	437	-3.90178	2.70364	103.922	1.22859e-09	4.43393e-08	Exon (uc007dxj.1/uc007dxj.1, exon 2 of 4)	1	181509633	181511451	1819	-142063	ENSMUSG00000050625	Ccdc121
Peak_45350	chr4	8938907	8939468	562	2.8564	3.59338	103.888	1.2322e-09	4.44465e-08	Distal Intergenic	4	8856671	8868449	11779	82236	ENSMUSG00000041235	Chd7
Peak_4592	chr1	168473664	168474139	476	2.41801	4.11875	103.877	1.23337e-09	4.44656e-08	Distal Intergenic	1	168490643	168490762	120	-16504	ENSMUSG00000098407	Mir6348
Peak_39301	chr2	152068858	152069573	716	-2.61386	3.60949	103.85	1.23623e-09	4.45307e-08	Distal Intergenic	2	152081529	152095802	14274	-11956	ENSMUSG00000060257	Scrt2
Peak_32557	chr18	70096886	70097441	556	-2.85023	3.64555	103.845	1.23674e-09	4.45307e-08	Intron (uc008foa.2/80718, intron 2 of 6)	18	69979131	70053588	74458	-43298	ENSMUSG00000024511	Rab27b
Peak_68549	chrX	109845085	109845644	560	-2.85574	3.67031	103.841	1.23711e-09	4.45307e-08	Distal Intergenic	20	110372753	110375156	2404	-527109	ENSMUSG00000082853	Gm7134
Peak_63358	chr8	103874033	103874761	729	-2.43048	4.28354	104.669	1.2446e-09	4.47772e-08	Distal Intergenic	8	104101625	104144502	42878	-226864	ENSMUSG00000031871	Cdh5
Peak_51644	chr5	92263650	92264554	905	1.66288	5.10062	103.76	1.2457e-09	4.47935e-08	Promoter (<=1kb)	5	92257660	92262782	5123	-868	ENSMUSG00000029413	Naaa
Peak_66469	chr9	91168014	91168510	497	2.90411	3.39229	103.717	1.25034e-09	4.4937e-08	Distal Intergenic	9	91360345	91365774	5430	197264	ENSMUSG00000032368	Zic1
Peak_66135	chr9	79784381	79784740	360	3.02249	2.84305	103.696	1.2526e-09	4.49947e-08	Intron (uc009quw.2/69981, intron 1 of 6)	9	79768941	79793430	24490	8690	ENSMUSG00000032328	Tmem30a
Peak_38666	chr2	132738927	132739285	359	3.32272	3.55619	104.041	1.25332e-09	4.49974e-08	Intron (uc008mne.2/73747, intron 2 of 2)	2	132781278	132795072	13795	-41993	ENSMUSG00000027350	Chgb
Peak_66482	chr9	91609309	91610083	775	-1.78689	4.31528	103.653	1.25725e-09	4.51151e-08	Distal Intergenic	9	91378199	91389348	11150	231110	ENSMUSG00000036972	Zic4
Peak_46403	chr4	49219986	49220439	454	-3.40612	3.03661	103.639	1.25872e-09	4.51444e-08	Intron (uc008svo.1/272031, intron 2 of 3)	4	49059462	49340261	280800	160524	ENSMUSG00000063446	Plppr1
Peak_7992	chr10	83140198	83140818	621	1.99064	4.43877	103.606	1.26227e-09	4.52482e-08	Intron (uc007gke.1/58250, intron 2 of 2)	10	82985749	83195891	210143	154449	ENSMUSG00000034612	Chst11
Peak_67922	chrX	53100919	53101373	455	3.35717	3.00708	103.557	1.26768e-09	4.5404e-08	Intron (uc009tet.1/56096, intron 1 of 2)	20	53070002	53114405	44404	13032	ENSMUSG00000061082	Plac1
Peak_37532	chr2	94088530	94089019	490	3.23816	2.99664	103.554	1.26793e-09	4.5404e-08	Intron (uc008lgp.1/56348, intron 3 of 10)	2	94032697	94157909	125213	68890	ENSMUSG00000027195	Hsd17b12
Peak_50746	chr5	53143337	53143714	378	3.40762	3.08313	103.539	1.26961e-09	4.54407e-08	Intron (uc008xlc.1/231238, intron 13 of 23)	5	53107083	53213452	106370	69738	ENSMUSG00000029189	Sel1l3
Peak_56533	chr6	125589938	125590926	989	2.63166	4.94004	118.791	1.27037e-09	4.54443e-08	Exon (uc009dup.1/22371, exon 11 of 13)	6	125603550	125643413	39864	-12624	ENSMUSG00000001930	Vwf
Peak_30821	chr18	17422942	17423493	552	-2.96074	3.34835	103.524	1.27123e-09	4.54507e-08	Distal Intergenic	18	17568746	17580990	12245	157497	NA	4930545E07Rik
Peak_9896	chr11	15649000	15649568	569	-2.72548	3.37539	103.518	1.27186e-09	4.54507e-08	Distal Intergenic	11	16257724	16284551	26828	-608156	ENSMUSG00000048834	Vstm2a
Peak_7594	chr10	71960592	71961153	562	-2.60038	3.36396	103.501	1.27369e-09	4.54927e-08	Distal Intergenic	10	71979885	71980690	806	19537	NA	1700049L16Rik
Peak_54685	chr6	58903155	58903608	454	1.91731	4.77642	103.493	1.27467e-09	4.55041e-08	3' UTR	6	58905233	58907126	1894	3518	ENSMUSG00000055430	Nap1l5
Peak_12025	chr11	92758440	92758956	517	-3.37801	3.68789	107.25	1.28642e-09	4.59001e-08	Distal Intergenic	11	93098410	93491923	393514	-339454	ENSMUSG00000056158	Car10
Peak_5457	chr1	194114408	194114850	443	-3.14471	3.17707	103.375	1.28756e-09	4.59169e-08	Distal Intergenic	1	194212187	194222759	10573	107909	ENSMUSG00000103692	4930503O07Rik
Peak_27735	chr16	91808713	91809081	369	3.82604	3.19917	103.373	1.29069e-09	4.60049e-08	Intron (uc007zyh.1/16443, intron 8 of 15)	16	91784063	91828333	44271	24650	ENSMUSG00000022957	Itsn1
Peak_21818	chr14	101510234	101511232	999	1.71228	4.57766	103.327	1.29289e-09	4.60364e-08	Intron (uc007uvn.2/210789, intron 1 of 18)	14	101462875	101501116	38242	-9118	ENSMUSG00000033083	Tbc1d4
Peak_41446	chr3	52511292	52511910	619	2.62841	3.64168	103.327	1.2929e-09	4.60364e-08	Distal Intergenic	3	52739724	52776654	36931	-227814	ENSMUSG00000102785	Gm2447
Peak_13235	chr12	12225688	12226133	446	-2.24333	4.29341	103.321	1.29363e-09	4.60385e-08	Distal Intergenic	12	12262139	12376361	114223	-36006	ENSMUSG00000020589	Fam49a
Peak_30367	chr18	3566417	3567186	770	-2.66009	4.02878	104.182	1.29463e-09	4.60506e-08	Distal Intergenic	18	3507957	3516404	8448	58460	ENSMUSG00000024232	Bambi
Peak_40802	chr3	30436321	30436804	484	2.7914	3.35406	103.286	1.29745e-09	4.6127e-08	Intron (uc008our.1/14013, intron 2 of 7)	3	30236569	30509487	272919	72683	ENSMUSG00000027684	Mecom
Peak_27074	chr16	66820071	66820441	371	3.23761	2.75475	103.271	1.29916e-09	4.61642e-08	Intron (uc007zqn.2/239857, intron 3 of 9)	16	66657118	66664626	7509	162953	ENSMUSG00000092599	1700010K23Rik
Peak_23431	chr15	40120476	40120936	461	3.12021	3.33189	103.197	1.30744e-09	4.64118e-08	Distal Intergenic	15	40134365	40150010	15646	-13429	ENSMUSG00000094112	9330182O14Rik
Peak_6444	chr10	29595350	29595844	495	-2.44836	3.79862	103.197	1.30747e-09	4.64118e-08	Distal Intergenic	10	29453107	29535867	82761	-59483	ENSMUSG00000019880	Rspo3
Peak_15875	chr12	112617145	112617590	446	3.49409	3.45577	103.647	1.31085e-09	4.65079e-08	Promoter (2-3kb)	12	112620047	112641355	21309	-2457	ENSMUSG00000011148	Adssl1
Peak_14315	chr12	52394202	52394974	773	2.50456	4.37005	105.322	1.31344e-09	4.65759e-08	Distal Intergenic	12	52503972	52545639	41668	-108998	ENSMUSG00000035133	Arhgap5
Peak_34081	chr19	33326482	33327199	718	-2.37785	3.731	103.115	1.31671e-09	4.66557e-08	Intron (uc008hft.2/67795, intron 4 of 6)	19	33137745	33392295	254551	65096	ENSMUSG00000071573	Rnls
Peak_408	chr1	20900461	20901009	549	2.43359	3.91399	103.112	1.31704e-09	4.66557e-08	Intron (uc007ald.1/74229, intron 1 of 2)	1	20890622	20938756	48135	9839	ENSMUSG00000025931	Paqr8
Peak_63173	chr8	94678497	94679288	792	2.49815	4.00459	103.094	1.31916e-09	4.67069e-08	Intron (uc009mwv.1/67801, intron 2 of 3)	8	94667091	94674457	7367	11406	ENSMUSG00000031776	Arl2bp
Peak_27618	chr16	89587180	89587525	346	2.84148	3.63813	103.071	1.32172e-09	4.67738e-08	Distal Intergenic	16	89570176	89571183	1008	-15997	ENSMUSG00000091212	Krtap11-1
Peak_59169	chr7	90119465	90119918	454	3.44695	3.53998	104.434	1.32283e-09	4.6789e-08	Distal Intergenic	7	90124836	90129474	4639	9556	ENSMUSG00000097162	2310010J17Rik
Peak_64692	chr9	27336932	27337569	638	2.95091	3.58256	103.04	1.32529e-09	4.68523e-08	Distal Intergenic	9	27352685	27357543	4859	-15116	NA	NA
Peak_58431	chr7	64884355	64884922	568	-3.59012	3.09392	103.019	1.32766e-09	4.6912e-08	Intron (uc009hgl.2/70638, intron 2 of 9)	7	64871650	64873040	1391	-11315	ENSMUSG00000070520	Nsmce3
Peak_47882	chr4	102483365	102483668	304	3.17788	3.09314	102.939	1.33686e-09	4.7213e-08	Intron (uc008twi.1/18578, intron 3 of 6)	4	102570060	102607262	37203	-86392	ENSMUSG00000028525	Pde4b
Peak_23878	chr15	58956791	58957248	458	3.25754	3.1616	102.93	1.33787e-09	4.72246e-08	Intron (uc007vtx.2/211401, intron 5 of 12)	15	58933810	58939489	5680	22981	ENSMUSG00000022354	Ndufb9
Peak_2106	chr1	80061537	80061999	463	3.14616	3.22268	102.87	1.34487e-09	4.74475e-08	Distal Intergenic	1	80198699	80213944	15246	151945	ENSMUSG00000043230	Fam124b
Peak_30966	chr18	23503569	23503853	285	3.13654	2.81491	102.852	1.34697e-09	4.7481e-08	Intron (uc008efs.2/13527, intron 2 of 16)	18	23497482	23659719	162238	6087	ENSMUSG00000024302	Dtna
Peak_11083	chr11	56009566	56010071	506	3.48625	3.22087	102.85	1.34719e-09	4.7481e-08	Distal Intergenic	11	56024990	56040987	15998	30916	ENSMUSG00000037393	Nmur2
Peak_58397	chr7	64271959	64272266	308	-3.00133	3.20682	102.843	1.348e-09	4.74853e-08	Distal Intergenic	7	64287670	64303172	15503	-15404	ENSMUSG00000030522	Mtmr10
Peak_61623	chr8	40990034	40990652	619	2.50184	4.78331	112.481	1.35023e-09	4.75396e-08	3' UTR	8	40990912	41015495	24584	24843	ENSMUSG00000045636	Mtus1
Peak_17844	chr13	69939472	69940027	556	3.33414	3.7451	105.164	1.35269e-09	4.75731e-08	Distal Intergenic	13	70021959	70119949	97991	-81932	ENSMUSG00000113074	Gm3772
Peak_44320	chr3	136842396	136842720	325	2.84359	3.04026	102.8	1.35306e-09	4.75731e-08	Intron (uc008rmg.2/19055, intron 2 of 13)	3	136903052	136937727	34676	-60332	ENSMUSG00000028161	Ppp3ca
Peak_1789	chr1	69774473	69774736	264	3.64327	2.67247	102.798	1.35324e-09	4.75731e-08	Distal Intergenic	1	69826970	69926250	99281	-52234	ENSMUSG00000053153	Spag16
Peak_52323	chr5	118321591	118322261	671	3.0954	3.8087	103.501	1.35512e-09	4.76149e-08	Distal Intergenic	5	118245227	118263114	17888	76364	ENSMUSG00000032840	2410131K14Rik
Peak_15347	chr12	91643102	91643527	426	-3.07758	3.12639	102.763	1.35736e-09	4.76695e-08	Intron (uc007okt.2/108800, intron 5 of 6)	12	91555262	91590487	35226	-52615	ENSMUSG00000020962	Gtf2a1
Peak_55502	chr6	92004451	92004713	263	-3.83489	2.8639	102.748	1.3591e-09	4.76957e-08	Intron (uc009cyn.2/232237, intron 2 of 20)	6	91987161	92076005	88845	17290	ENSMUSG00000034037	Fgd5
Peak_47673	chr4	97235910	97236491	582	-2.71066	3.76228	102.745	1.35949e-09	4.76957e-08	Distal Intergenic	4	97581943	98118876	536934	-345452	ENSMUSG00000028565	Nfia
Peak_62117	chr8	61215422	61216023	602	-2.67351	3.5398	102.734	1.3607e-09	4.77141e-08	Distal Intergenic	8	61224171	61386641	162471	-8148	ENSMUSG00000031642	Sh3rf1
Peak_46450	chr4	52666803	52667424	622	-2.42739	3.77047	102.717	1.36276e-09	4.77622e-08	Distal Intergenic	4	52596274	52612163	15890	70529	ENSMUSG00000028314	Toporsl
Peak_42290	chr3	80878536	80878968	433	2.68796	3.84013	102.677	1.36751e-09	4.78967e-08	Promoter (<=1kb)	3	80860161	80878076	17916	-460	ENSMUSG00000028020	Glrb
Peak_17362	chr13	48324069	48324770	702	2.7855	3.96177	102.692	1.36798e-09	4.78967e-08	Distal Intergenic	13	48272418	48273884	1467	-50185	ENSMUSG00000097326	A330048O09Rik
Peak_43088	chr3	103081098	103081378	281	3.49125	2.82321	102.664	1.36894e-09	4.7906e-08	Exon (uc008qso.1/229665, exon 4 of 14)	3	103074014	103099720	25707	7084	ENSMUSG00000070385	Ampd1
Peak_54503	chr6	53637674	53638035	362	3.18824	2.97888	102.631	1.37289e-09	4.80198e-08	Intron (uc009bzg.2/320189, intron 7 of 7)	6	53573374	53695832	122459	64300	ENSMUSG00000053007	Creb5
Peak_37182	chr2	78994808	78995135	328	-3.15176	2.73831	102.555	1.38201e-09	4.83145e-08	Distal Intergenic	2	78869047	78920583	51537	125761	ENSMUSG00000027011	Ube2e3
Peak_55010	chr6	72969718	72970117	400	2.96464	3.00736	102.532	1.38473e-09	4.83853e-08	Distal Intergenic	6	72957347	72958748	1402	-10970	ENSMUSG00000079523	Tmsb10
Peak_20987	chr14	66826417	66827226	810	2.49922	4.4873	106.331	1.38648e-09	4.84192e-08	Intron (uc007uko.1/12934, intron 7 of 13)	14	66802864	66868600	65737	41374	ENSMUSG00000022048	Dpysl2
Peak_61934	chr8	53600062	53600755	694	-2.37244	4.27072	102.867	1.38769e-09	4.84192e-08	Intron (uc009lsa.2/234258, intron 7 of 9)	8	53586867	53639065	52199	38310	ENSMUSG00000039396	Neil3
Peak_15475	chr12	98741201	98741656	456	2.75199	3.57207	102.506	1.3878e-09	4.84192e-08	Distal Intergenic	12	98676741	98737405	60665	-3796	ENSMUSG00000021009	Ptpn21
Peak_4276	chr1	161380024	161380484	461	-2.31261	4.19336	102.492	1.38958e-09	4.84362e-08	Distal Intergenic	1	161395438	161418206	22769	-14954	ENSMUSG00000026700	Tnfsf4
Peak_4218	chr1	159663448	159664134	687	2.30377	4.19627	102.491	1.38969e-09	4.84362e-08	Intron (uc007dea.2/21960, intron 1 of 22)	1	159523769	159924922	401154	139679	ENSMUSG00000015829	Tnr
Peak_60657	chr8	4411135	4411508	374	2.80734	3.01817	102.436	1.39623e-09	4.86398e-08	Distal Intergenic	8	4349588	4360020	10433	61547	ENSMUSG00000023235	Ccl25
Peak_1997	chr1	75451803	75452172	370	2.66859	3.51051	102.411	1.39926e-09	4.87208e-08	Promoter (1-2kb)	1	75450510	75474340	23831	1293	ENSMUSG00000033007	Asic4
Peak_41680	chr3	59311949	59312529	581	2.42113	3.57555	102.328	1.40941e-09	4.90495e-08	Intron (uc008pii.2/329650, intron 42 of 43)	3	59316735	59344256	27522	31727	ENSMUSG00000036334	Igsf10
Peak_42120	chr3	73647068	73647477	410	3.21532	3.20087	102.296	1.41336e-09	4.91624e-08	Intron (uc008pmv.1/12038, intron 2 of 2)	3	73635809	73702108	66300	54631	ENSMUSG00000027792	Bche
Peak_58801	chr7	75872398	75872846	449	3.07888	3.35978	102.273	1.41611e-09	4.92239e-08	3' UTR	7	75848338	75874130	25793	24060	ENSMUSG00000055652	Klhl25
Peak_54081	chr6	36903256	36903768	513	2.65969	3.72501	102.27	1.41656e-09	4.92239e-08	Intron (uc009bjb.1/320127, intron 28 of 33)	6	36715663	36811361	95699	-91895	ENSMUSG00000029838	Ptn
Peak_28079	chr17	10732604	10733047	444	-3.71093	2.79675	102.241	1.42007e-09	4.93213e-08	Intron (uc008akg.1/69310, intron 2 of 4)	17	10403012	10840191	437180	107144	ENSMUSG00000037196	Pacrg
Peak_5960	chr10	17599211	17599545	335	-3.26433	3.10664	102.223	1.42234e-09	4.93755e-08	Distal Intergenic	10	17723228	17725674	2447	-123683	ENSMUSG00000039910	Cited2
Peak_5027	chr1	180344634	180345223	590	3.17331	3.39977	102.209	1.42402e-09	4.94087e-08	Intron (uc007dwg.1/320404, intron 2 of 7)	1	180326969	180330549	3581	-14085	NA	Gm5069
Peak_31558	chr18	41678523	41679184	662	3.38867	4.17088	111.743	1.42756e-09	4.95069e-08	Distal Intergenic	18	41875696	41951194	75499	272010	ENSMUSG00000056671	Prelid2
Peak_615	chr1	28677718	28678038	321	-2.85672	3.0813	102.097	1.438e-09	4.98441e-08	Distal Intergenic	1	28776122	28780252	4131	102214	ENSMUSG00000048411	Gm597
Peak_31216	chr18	32184132	32184410	279	3.70708	2.51405	102.086	1.43926e-09	4.98627e-08	Intron (uc008ejc.1/26405, intron 1 of 6)	18	32163089	32236751	73663	21043	ENSMUSG00000024383	Map3k2
Peak_5181	chr1	185091770	185092121	352	3.05714	2.87274	102.054	1.44332e-09	4.99784e-08	Distal Intergenic	1	184896424	184999549	103126	-92221	ENSMUSG00000026620	Mark1
[truncated: 63,535 more rows]
