# Supplementary material for: Transcriptional and epigenetic characterization of early striosomes identifies Foxf2 and Olig2 as factors required for development of striatal compartmentation and neuronal phenotypic differentiation
Source: bioRxiv preprint, doi:10.1101/2020.05.19.105171, version 2 (2020-05-28)
Supplement: Table 1 Differential expression Bioinformatics [file 105171_file03.xlsx]

## Sheet: SUMMARY OF ANALYSIS TABS
SUMMARY SAMPLES AND ANALYSIS	DESCRIPTION	ENRICHED CELL TYPE	Gene type	Cutoff
SAMPLE DESCRIPTION	Experiment and sample summary	Patch vs Matrix	N/A	N/A
nr4a1 DIFFERENTIATIAL EXPRESSION	Differentially expressed genes by Nr4a1 status in all cells	Patch vs Matrix	gene	adjust p-value<0.01
TRANSCRIPTION FACTORS DIFFERENTIALLY EXPRESSED	Differentially expressed transcription factors by Nr4a1 status in all cells	Patch vs Matrix	TF	adjust p-value<0.01
Transcription factors Similarity Test	Similarity analysis between TFs and Nr4a1	Patch vs Matrix	TF	adjust p-value<0.01
GO GEN NR4A1 GFP pos 0	GO enrichment analysis for gene enriched in patch cells	Patch	gene	adjust p-value<0.01, logfoldchange > 0
GO GEN NR4A1 GFP pos 1	GO enrichment analysis for gene enriched in patch cells	Patch	gene	adjust p-value<0.01, logfoldchange > 1
GO GEN NR4A1 GFP pos 2	GO enrichment analysis for gene enriched in patch cells	Patch	gene	adjust p-value<0.01, logfoldchange > 2
GO GEN 01 GFP neg 0	GO enrichment analysis for gene enriched in matrix cells	Matrix	gene	adjust p-value<0.01, logfoldchange < 0
GO GEN 01 GFP neg 1	GO enrichment analysis for gene enriched in matrix cells	Matrix	gene	adjust p-value<0.01, logfoldchange < -1
GO GEN 01 GFP neg 2	GO enrichment analysis for gene enriched in matrix cells	Matrix	gene	adjust p-value<0.01, logfoldchange < -2
GO TF NR4A1 GFP 0	GO enrichment analysis for TF enriched in patch cells	Patch	TF	adjust p-value<0.01, logfoldchange < 0
GO TF NR4A1 GFP 1	GO enrichment analysis for TF enriched in patch cells	Patch	TF	adjust p-value<0.01, logfoldchange < -1
GO TF GFP neg 0	GO enrichment analysis for TF enriched in matrix cells	Matrix	TF	adjust p-value<0.01, logfoldchange > 0
GO TF GFP neg 1	GO enrichment analysis for TF enriched in matrix cells	Matrix	TF	adjust p-value<0.01, logfoldchange > 1
KEGG NR4A1 GFP 0	KEGG enrichment analysis for gene enriched in patch cells	Patch	gene	adjust p-value<0.01, logfoldchange > 0
KEGG NR4A1 GFP 1	KEGG enrichment analysis for gene enriched in patch cells	Patch	gene	adjust p-value<0.01, logfoldchange > 1
KEGG NR4A1 GFP 2	KEGG enrichment analysis for gene enriched in patch cells	Patch	gene	adjust p-value<0.01, logfoldchange > 2
KEGG GFP neg 0	KEGG enrichment analysis for gene enriched in matrix cells	Matrix	gene	adjust p-value<0.01, logfoldchange < 0
KEGG GFP neg 1	KEGG enrichment analysis for gene enriched in matrix cells	Matrix	gene	adjust p-value<0.01, logfoldchange < -1
KEGG GFP neg 2	KEGG enrichment analysis for gene enriched in matrix cells	Matrix	gene	adjust p-value<0.01, logfoldchange < -2
KEGG TF NR4A1 GFP 0	KEGG enrichment analysis for TF enriched in patch cells	Patch	TF	adjust p-value<0.01, logfoldchange > 0
KEGG TF NR4A1 GFP 1	KEGG enrichment analysis for TF enriched in patch cells	Patch	TF	adjust p-value<0.01, logfoldchange > 1
KEGG TF GFP neg 0	KEGG enrichment analysis for TF enriched in matrix cells	Matrix	TF	adjust p-value<0.01, logfoldchange < 0
KEGG TF GFP neg 1	KEGG enrichment analysis for TF enriched in matrix cells	Matrix	TF	adjust p-value<0.01, logfoldchange < -1
TF ENRICH NR4A1 GFP PATCH	TF enrichment analysis for gene enriched in patch cells	Patch	gene	adjust p-value<0.01, logfoldchange > 0
COEXP NR4A1 GFP PATCH	TF co-expression enrichment analysis for gene enriched in patch cells	Patch	gene	adjust p-value<0.01, logfoldchange > 0
TF ENRICH GFP neg 1 MATRIX	TF enrichment analysis for gene enriched in matrix cells	Matrix	gene	adjust p-value<0.01, logfoldchange < 0
COEXP TF GENE GFP neg MATRIX	TF co-expression enrichment analysis for gene enriched in matrix cells	Matrix	gene	adjust p-value<0.01, logfoldchange < 0
TF ENRICH NR4A1 GFP pos PATCH	TF enrichment analysis for TF enriched in patch cells	Patch	TF	adjust p-value<0.01, logfoldchange > 0
COEXP TF NR4A1 GFP pos PATCH	TF co-expression enrichment analysis for TF enriched in patch cells	Patch	TF	adjust p-value<0.01, logfoldchange > 0
TF ENRICH GFP neg MATRIX	TF enrichment analysis for TF enriched in matrix cells	Matrix	TF	adjust p-value<0.01, logfoldchange < 0
COEXP TF GFP neg MATRIX	TF co-expression enrichment analysis for TF enriched in matrix cells	Matrix	TF	adjust p-value<0.01, logfoldchange < 0

## Sheet: SAMPLES
SAMPLE ID	SEX	MOUSE ID	Nr4a1-GFP	% Sequence Uniquely Mapped
1_S7_L005	Fem	F1	positive	92.7
1_S7_L006	Fem	F1	positive	92.4
2_S8_L005	Fem	F1	negative	90.7
2_S8_L006	Fem	F1	negative	90.4
3_S9_L005	Fem	F2	positive	92.5
3_S9_L006	Fem	F2	positive	92.3
4_S10_L005	Fem	F2	negative	92.8
4_S10_L006	Fem	F2	negative	92.7
5_S11_L005	male	M1	positive	91.5
5_S11_L006	male	M1	positive	91.2
6_S12_L005	male	M1	negative	90.6
6_S12_L006	male	M1	negative	90.4
7_S13_L005	male	M2	positive	93.1
7_S13_L006	male	M2	positive	93
8_S14_L005	male	M2	negative	92.6
8_S14_L006	male	M2	negative	92.4
9_S15_L005	male	M3	positive	92
9_S15_L006	male	M3	positive	91.7
10_S16_L005	male	M3	negative	92.8
10_S16_L006	male	M3	negative	92.6
11_S17_L005	male	M4	positive	92.1
11_S17_L006	male	M4	positive	91.9
12_S18_L005	male	M4	negative	92.6
12_S18_L006	male	M4	negative	92.4
Comment: Total of 6 animals, 12 samples and two technical replicates

## Sheet: nr4a1 DIFFERENTIAL EXPRESSION
	baseMean	log2FoldChange	lfcSE	stat	pvalue	padj	entrez
Gjc3	336.348	10.3753	0.578587	17.9321	6.62111e-72	4.56841e-70	118446
Gm34923	176.29	9.9056	0.601677	16.4633	6.73316e-61	3.62593e-59	102638333
Fa2h	130.256	9.46861	0.614262	15.4146	1.30552e-53	5.92915e-52	338521
Irx2	45.3065	8.90883	0.618983	14.3927	5.75166e-47	2.2012e-45	16372
AC099605.1	60.0515	8.83379	0.633661	13.9409	3.57539e-44	1.25611e-42	NA
Neu4	155.599	8.60418	0.693046	12.415	2.16635e-35	5.93329e-34	241159
Irx1	191.373	8.57693	0.43724	19.6161	1.12733e-85	9.98696e-84	16371
Gjb1	35.4179	8.55296	0.64165	13.3296	1.55667e-40	4.95905e-39	14618
Bmp4	176.169	8.31721	0.698581	11.9059	1.10313e-32	2.74855e-31	12159
Gm15222	27.5004	8.18387	0.663638	12.3318	6.1038e-35	1.64504e-33	102638002
Ltf	47.8709	8.17901	2.18239	3.74773	0.000178441	0.000721989	17002
Tafa4	35.9785	8.09704	0.623042	12.996	1.28951e-38	3.88381e-37	320701
Gimap4	25.7625	8.09468	0.894624	9.04813	1.45434e-19	2.09452e-18	107526
S100a3	35.4961	8.06868	0.654957	12.3194	7.12287e-35	1.9179e-33	20197
Gm18726	35.4961	8.06803	0.671736	12.0107	3.12128e-33	7.94944e-32	100417636
Wfdc1	25.1333	8.05716	0.704776	11.4322	2.88575e-30	6.57379e-29	67866
Foxl2	24.6912	8.03586	0.708518	11.3418	8.1468e-30	1.82543e-28	26927
4933407I08Rik	92.238	7.94901	0.530743	14.9771	1.03568e-50	4.32078e-49	71009
Cldn11	78.7502	7.89947	0.550117	14.3596	9.27447e-47	3.50732e-45	18417
Foxf2	161.372	7.88456	0.439633	17.9344	6.35205e-72	4.39332e-70	14238
Cstdc4	19.5029	7.69416	2.07432	3.70924	0.000207882	0.00083092	433016
Cytip	19.4666	7.69203	0.93942	8.18806	2.65469e-16	3.25823e-15	227929
Gm47859	18.357	7.60551	0.852107	8.92553	4.43588e-19	6.21391e-18	NA
S100a9	58.5112	7.54353	2.17494	3.46839	0.000523595	0.00194094	20202
Mmrn1	23.9832	7.50413	0.702486	10.6822	1.23256e-26	2.40668e-25	70945
Enpp6	419.516	7.45623	0.542876	13.7347	6.29311e-43	2.1326e-41	320981
S100a8	16.3306	7.43895	1.50328	4.94849	7.47905e-07	4.22249e-06	20201
Cd40	44.0465	7.42788	0.616979	12.0391	2.2133e-33	5.66207e-32	21939
9530026P05Rik	21.7546	7.36183	0.63139	11.6597	2.04731e-31	4.87263e-30	330385
Itgb2l	14.9114	7.31158	0.710989	10.2837	8.34906e-25	1.50909e-23	16415
1110028F11Rik	14.8155	7.29391	0.714038	10.215	1.69841e-24	3.03924e-23	68690
Gpr17	8808.67	7.25995	0.22699	31.9835	1.84781e-224	8.8396e-222	574402
Gm42817	14.2115	7.23448	0.807556	8.95849	3.2915e-19	4.65398e-18	NA
Gm35876	14.237	7.22989	0.737168	9.80765	1.04368e-22	1.73461e-21	102639604
Clic5	13.8427	7.20182	0.725444	9.92746	3.16192e-23	5.34176e-22	224796
Rbpjl	61.9701	7.19538	0.496226	14.5002	1.20783e-47	4.6786e-46	19668
Slc52a3	16.3516	7.19238	0.909915	7.90446	2.69102e-15	3.08468e-14	69698
Gm47933	13.3598	7.15062	0.938143	7.6221	2.4959e-14	2.66418e-13	NA
Gal3st1	158.813	7.10484	0.362883	19.5789	2.34061e-85	2.06716e-83	53897
Gm32093	12.7523	7.0879	0.830136	8.53824	1.3628e-17	1.78696e-16	102634536
Dipk2b	46.3931	7.08133	0.640145	11.0621	1.91625e-28	4.06219e-27	75905
Bcas1os1	113.243	7.05485	0.411639	17.1385	7.66501e-66	4.6711e-64	NA
Pstpip2	222.464	7.04377	0.585802	12.0241	2.65326e-33	6.77548e-32	19201
Des	15.9885	6.91628	0.701091	9.86502	5.90228e-23	9.9072e-22	13346
S100a2	183.542	6.85509	0.296388	23.1287	2.38065e-118	3.28518e-116	628324
Adm	59.3082	6.84387	0.502241	13.6267	2.78029e-42	9.27937e-41	11535
Matn4	674.4	6.82713	0.347128	19.6674	4.09883e-86	3.66506e-84	17183
Zfp488	820.75	6.82632	0.71811	9.50596	1.98215e-21	3.10047e-20	382867
Madcam1	10.5118	6.80032	1.06234	6.40125	1.54106e-10	1.24285e-09	17123
Gm27804	10.3974	6.77844	0.730968	9.27323	1.80588e-20	2.71383e-19	NA
Fendrr	10.0293	6.73554	0.725647	9.28211	1.66149e-20	2.50078e-19	68790
Sox17	67.646	6.70817	0.474169	14.1472	1.94304e-45	7.0507e-44	20671
Plac8	9.78396	6.70139	1.18457	5.65721	1.53852e-08	1.04299e-07	231507
Edn3	9.72168	6.68874	1.04047	6.42855	1.2883e-10	1.04517e-09	13616
Tmprss3	9.62127	6.67589	0.801397	8.33032	8.06266e-17	1.01635e-15	140765
Trav12-4	9.62339	6.67443	0.766263	8.71036	3.02924e-18	4.08208e-17	100101936
Gm44106	9.2183	6.61987	0.795085	8.32599	8.3624e-17	1.05367e-15	NA
Foxq1	35.9008	6.61476	0.685082	9.65543	4.66201e-22	7.54731e-21	15220
Gm19619	9.09445	6.59275	0.837821	7.86893	3.57688e-15	4.05478e-14	100503265
I730030J21Rik	10.7019	6.58491	0.730648	9.01242	2.01551e-19	2.88247e-18	619313
Gm42497	30.3532	6.55141	0.647898	10.1118	4.89815e-24	8.59361e-23	NA
Gm24166	8.75195	6.54448	0.727436	8.99664	2.32728e-19	3.32007e-18	NA
Atp8b4	8.53611	6.50335	1.14581	5.67575	1.38086e-08	9.41223e-08	241633
Gm43169	447.759	6.49215	0.194177	33.4342	4.36977e-245	2.66863e-242	NA
Mgp	11.8719	6.4831	1.13447	5.71466	1.09924e-08	7.57903e-08	17313
Trav3-4	8.39056	6.48261	0.808521	8.01786	1.07607e-15	1.27052e-14	211027
Tnfrsf11b	77.4043	6.46297	0.438437	14.7409	3.51885e-49	1.41459e-47	18383
Tecrl	8.05758	6.42008	1.04674	6.13341	8.6017e-10	6.51265e-09	243078
Gvin1	7.98174	6.40499	1.0012	6.39733	1.58118e-10	1.2734e-09	74558
Cd163	13.1865	6.39388	0.843523	7.57997	3.45645e-14	3.6582e-13	93671
Nos2	49.5675	6.39168	0.549096	11.6404	2.56878e-31	6.08348e-30	18126
Gm22957	11.1287	6.38568	0.762172	8.37827	5.37136e-17	6.8461e-16	NA
Stfa2	7.83107	6.37856	1.90757	3.34382	0.000826335	0.00294784	20862
Gm42775	7.75934	6.37008	0.750458	8.48825	2.0977e-17	2.73062e-16	NA
AC161579.1	7.6371	6.34514	1.08642	5.8404	5.20748e-09	3.69063e-08	NA
Gm10030	7.55936	6.33077	0.928625	6.81736	9.27293e-12	8.25561e-11	791282
Clec4e	7.48357	6.31591	1.15097	5.48745	4.0778e-08	2.64509e-07	56619
Gm15475	7.43089	6.30411	0.798298	7.89694	2.85823e-15	3.26982e-14	NA
Foxl2os	27.4294	6.26215	0.660512	9.48074	2.52479e-21	3.92999e-20	768252
Mir219a-2	7.17727	6.24623	0.800518	7.80274	6.05773e-15	6.76557e-14	723904
Matn1	7.16746	6.24389	0.900618	6.9329	4.12313e-12	3.79007e-11	17180
Gm37811	7.07952	6.22662	0.959266	6.49103	8.52519e-11	7.00941e-10	NA
Cyyr1	176.735	6.2254	0.439524	14.164	1.53138e-45	5.59938e-44	224405
Kcnj15	13.8749	6.21945	0.863175	7.20532	5.79086e-13	5.67869e-12	16516
Clec9a	9.87198	6.21689	0.790718	7.86233	3.77055e-15	4.26759e-14	232414
Tead4	9.76532	6.19755	0.872869	7.10021	1.24571e-12	1.18947e-11	21679
Ifi204	6.85819	6.1902	0.999197	6.19517	5.82218e-10	4.47307e-09	15951
Gm45011	9.60041	6.1812	0.836971	7.3852	1.5222e-13	1.5499e-12	NA
Gm9972	6.8188	6.17952	1.16757	5.29263	1.2057e-07	7.43285e-07	791397
Gm49246	6.79345	6.16966	0.993762	6.20839	5.35289e-10	4.128e-09	NA
Mall	6.6572	6.14152	1.01565	6.04689	1.4767e-09	1.09808e-08	228576
Rbp4	6.44642	6.09618	0.956059	6.37636	1.81344e-10	1.45232e-09	19662
Gm15931	6.38878	6.09144	0.991557	6.14331	8.08197e-10	6.13047e-09	112136069
Ctla2a	52.3455	6.08495	0.555398	10.956	6.21834e-28	1.2887e-26	13024
Tmem40	6.39233	6.08286	0.98936	6.14828	7.83287e-10	5.9478e-09	94346
Ackr2	80.3494	6.06787	0.762212	7.96087	1.70832e-15	1.98678e-14	59289
Gm18303	6.3068	6.06279	1.07772	5.62555	1.84917e-08	1.24534e-07	100416885
Sox10	3154.62	6.04128	0.309553	19.5162	8.00408e-85	6.96185e-83	20665
Sgms2	6.1533	6.0399	0.876552	6.89052	5.5589e-12	5.03811e-11	74442
Bcas1os2	130.914	6.03224	0.549678	10.9741	5.08853e-28	1.05838e-26	73303
Sox5os4	6.16326	6.02507	0.844252	7.13657	9.56882e-13	9.24449e-12	102633928
Gm44087	6.13199	6.02412	0.781359	7.70979	1.26023e-14	1.37485e-13	NA
AI661453	16.6846	6.02154	0.806868	7.46285	8.46684e-14	8.7293e-13	224833
Gm8250	6.06115	6.01179	0.89964	6.68245	2.34986e-11	2.02122e-10	666712
Acan	293.794	6.01042	0.223378	26.907	1.81846e-159	4.2093e-157	11595
Zfp366	569.638	5.99384	0.646097	9.27699	1.74339e-20	2.6213e-19	238803
Gm37652	5.97324	5.987	1.11215	5.38329	7.31381e-08	4.61685e-07	NA
Pdgfra	19876.6	5.97901	0.0858567	69.6394	0	0	18595
Stfa1	5.90536	5.97559	1.37764	4.33757	1.44065e-05	6.9114e-05	20861
Cspg4	5402.37	5.93081	0.14269	41.5644	0	0	121021
Ear2	5.7359	5.93042	1.37863	4.30167	1.69514e-05	8.05288e-05	13587
Zfp831	5.61532	5.90039	1.16859	5.04917	4.43743e-07	2.56996e-06	100043757
Gm16300	5.62818	5.89559	1.12535	5.23889	1.61547e-07	9.8114e-07	100416251
Lims2	247.398	5.8864	0.400551	14.6957	6.86437e-49	2.72138e-47	225341
Pnlip	73.9444	5.88034	0.912067	6.44728	1.13878e-10	9.27012e-10	69060
B3gnt3	5.5076	5.87521	1.0663	5.50989	3.59048e-08	2.34595e-07	72297
Bcas1	1790.89	5.86174	0.220763	26.5522	2.42084e-155	5.38647e-153	76960
Gm14610	7.65982	5.84901	0.835635	6.99948	2.56908e-12	2.39962e-11	100415992
Gm24226	5.37978	5.84208	1.15881	5.04147	4.61976e-07	2.67233e-06	NA
Cd93	1349.5	5.82499	0.576545	10.1033	5.34279e-24	9.34516e-23	17064
Mag	159.229	5.82476	0.609736	9.55292	1.26089e-21	1.99073e-20	17136
Gm34648	5.30591	5.81538	1.0455	5.56231	2.66232e-08	1.764e-07	102637968
Gm15426	5.28864	5.81535	1.12297	5.17854	2.2363e-07	1.33615e-06	100416511
A4galt	5.30407	5.81415	1.28363	4.52947	5.91305e-06	2.99704e-05	239559
Nkx2-2os	10.4488	5.80122	0.817719	7.09439	1.2992e-12	1.23973e-11	100313531
Plxnb3	736.152	5.79181	0.250859	23.0879	6.12942e-118	8.37775e-116	140571
AC124578.1	5.20966	5.78958	0.986958	5.86609	4.46194e-09	3.17715e-08	NA
Gm12145	5.19024	5.78427	0.829781	6.97084	3.15063e-12	2.91906e-11	NA
Tbx1	37.3891	5.77581	0.677405	8.52639	1.50991e-17	1.97264e-16	21380
AC113104.1	7.25111	5.76833	0.886563	6.5064	7.6975e-11	6.35148e-10	NA
Tinagl1	8.29483	5.72699	0.793519	7.2172	5.30696e-13	5.21485e-12	94242
Tnfrsf8	18.3282	5.72667	0.779151	7.34989	1.98372e-13	2.01126e-12	21941
Gm9869	4.96549	5.7251	1.02673	5.57604	2.46051e-08	1.63557e-07	791387
Gm32815	4.99089	5.7238	1.28554	4.45245	8.48964e-06	4.21661e-05	102635491
Slc38a5	198.653	5.72196	0.823811	6.94571	3.76552e-12	3.47307e-11	209837
C1ql1	608.05	5.71616	0.157529	36.2865	2.6462e-288	2.81311e-285	23829
Gm37520	53.5607	5.6523	0.501551	11.2696	1.85338e-29	4.07645e-28	NA
Lhfpl3	1384.78	5.64173	0.192577	29.296	1.16529e-188	3.80085e-186	269629
Gm42909	9.33263	5.63847	0.723307	7.79541	6.41999e-15	7.1479e-14	NA
Gm26633	6.65275	5.63374	0.820903	6.86286	6.74942e-12	6.06159e-11	102633600
Notumos	4.65537	5.62448	0.970734	5.79405	6.87094e-09	4.82546e-08	100015211
Susd5	49.8856	5.6199	0.465927	12.0618	1.68144e-33	4.32846e-32	382111
Npas1	481.383	5.61751	0.284195	19.7664	5.80083e-87	5.2524e-85	18142
Frzb	30.5243	5.61626	0.558055	10.064	7.97015e-24	1.38061e-22	20378
Rab44	4.58262	5.61378	0.86864	6.46272	1.02838e-10	8.40958e-10	442827
Gm6729	4.60576	5.61144	0.980858	5.72095	1.05928e-08	7.31408e-08	627035
Cstdc5	4.58466	5.6101	1.46445	3.83085	0.000127703	0.000529578	100034684
Gm40999	4.52042	5.59111	1.1724	4.76895	1.85191e-06	9.97846e-06	105245555
Acta2	67.5394	5.58309	0.686815	8.12895	4.3303e-16	5.24442e-15	11475
Gm37766	28.5581	5.5788	0.527637	10.5732	3.96794e-26	7.58268e-25	NA
Barx2	22.5253	5.57766	0.659396	8.45875	2.70267e-17	3.50224e-16	12023
Bcl3	4.48827	5.57324	1.57334	3.54231	0.000396645	0.00150276	12051
4922502N22Rik	4.45983	5.56927	0.982379	5.66916	1.43495e-08	9.76007e-08	70962
Gm13881	4.45524	5.56671	1.03358	5.38588	7.20919e-08	4.55381e-07	NA
Chrna1os	4.44998	5.56167	1.04316	5.33154	9.73828e-08	6.06066e-07	102633437
Gm7787	4.44388	5.55491	1.01111	5.49388	3.93194e-08	2.55857e-07	665794
Dpp4	64.8199	5.55191	0.617784	8.98682	2.54493e-19	3.61932e-18	13482
E330020D12Rik	18.5562	5.53482	0.768553	7.20161	5.95038e-13	5.83312e-12	626058
Gm44919	4.36536	5.52751	1.27762	4.32642	1.51551e-05	7.24995e-05	NA
Map3k7cl	4.34616	5.52691	1.39705	3.95614	7.61711e-05	0.000328822	224419
Tmem255b	195.403	5.52282	0.489897	11.2734	1.77515e-29	3.91036e-28	272465
Gm48745	4.32556	5.5169	1.05725	5.21817	1.80698e-07	1.09053e-06	NA
Lox	15.6205	5.51637	0.94355	5.8464	5.0232e-09	3.56442e-08	16948
Gm37356	4.29647	5.51188	1.41117	3.90589	9.38798e-05	0.000398084	NA
Grp	6.01006	5.49662	0.916002	6.00067	1.96508e-09	1.44588e-08	225642
Mobp	13.7306	5.49472	0.773052	7.10783	1.17882e-12	1.12936e-11	17433
Sp100	11.8426	5.48373	0.751885	7.29331	3.02425e-13	3.02668e-12	20684
6330420H09Rik	4.20902	5.47974	1.39186	3.937	8.25059e-05	0.00035388	319551
Cd300e	4.17404	5.4722	1.48374	3.68811	0.000225924	0.000895553	217306
Areg	4.18084	5.47126	1.24851	4.38225	1.1746e-05	5.70658e-05	11839
Thbd	46.8337	5.46955	0.484304	11.2936	1.41081e-29	3.12699e-28	21824
Slco1a4	235.072	5.45791	0.927981	5.88149	4.066e-09	2.90893e-08	28250
Eng	829.611	5.45772	0.430266	12.6845	7.20536e-37	2.05991e-35	13805
Gm32376	4.14373	5.45752	1.0675	5.11241	3.18066e-07	1.87041e-06	102634902
5031410I06Rik	4.11976	5.45059	1.18532	4.5984	4.25754e-06	2.19555e-05	381622
Chst9	15.0741	5.44704	0.774328	7.03453	1.99937e-12	1.88157e-11	71367
5830408C22Rik	4.08604	5.44171	1.16795	4.65921	3.17428e-06	1.6614e-05	74744
Myct1	37.2195	5.43875	0.54897	9.90718	3.87434e-23	6.52613e-22	68632
Gm10371	11.5638	5.43403	0.722837	7.51763	5.57762e-14	5.83222e-13	100038654
Bvht	5.7536	5.43296	1.01034	5.37737	7.55828e-08	4.76803e-07	545261
Cldn5	735.511	5.43228	0.695951	7.80556	5.92402e-15	6.61881e-14	12741
Prkcq	909.476	5.42967	0.280657	19.3463	2.18929e-83	1.88141e-81	18761
Trav3-3	4.06409	5.42769	1.26905	4.27698	1.89443e-05	8.94199e-05	320898
Grap	87.0454	5.42537	0.661544	8.20107	2.38258e-16	2.93381e-15	71520
Flt1	1834.71	5.42137	0.537175	10.0924	5.97169e-24	1.04008e-22	14254
Gm44589	4.02799	5.40933	1.27474	4.24349	2.20073e-05	0.000103147	NA
A930009A15Rik	108.925	5.40429	0.375925	14.376	7.32174e-47	2.78721e-45	77798
Vwf	1374.73	5.40009	0.404559	13.3481	1.21523e-40	3.88859e-39	22371
Kdr	1919.6	5.39876	0.688289	7.84375	4.37292e-15	4.93187e-14	16542
Cav1	216.064	5.39499	0.422832	12.7592	2.77118e-37	8.04259e-36	12389
Kank4	139.858	5.39175	0.634648	8.49565	1.96824e-17	2.56444e-16	242553
Apod	397.13	5.38982	0.571214	9.43573	3.88274e-21	5.99174e-20	11815
Robo4	275.442	5.38111	0.757345	7.10522	1.20127e-12	1.14933e-11	74144
Tmem132d	574.436	5.37913	0.183703	29.2817	1.77257e-188	5.71662e-186	243274
Gm42825	5.52564	5.37722	1.31817	4.0793	4.5171e-05	0.000202395	NA
Hmga2	63.3514	5.37324	0.430498	12.4814	9.42616e-36	2.61157e-34	15364
Gm48605	3.90058	5.37199	1.0942	4.90952	9.13018e-07	5.09653e-06	NA
Gm14389	3.89483	5.3683	1.13956	4.71087	2.46662e-06	1.31014e-05	NA
Gm21188	3.88683	5.36747	1.3252	4.05029	5.11532e-05	0.000227178	100861753
Adrb3	5.54306	5.36693	0.872767	6.14933	7.78129e-10	5.91176e-09	11556
Gm38285	5.48225	5.36154	1.04114	5.1497	2.60902e-07	1.5482e-06	NA
Gm26834	3.83485	5.35362	1.3612	3.93301	8.38893e-05	0.000359063	NA
Klra2	3.82668	5.34848	1.5086	3.54533	0.000392121	0.00148778	16633
Erbb3	136.639	5.34605	0.32382	16.5094	3.14228e-61	1.72453e-59	13867
Gm26752	5.3694	5.33093	0.842513	6.32741	2.49315e-10	1.97627e-09	102631579
Srarp	4.51572	5.32974	1.22437	4.35305	1.34254e-05	6.46775e-05	277744
Car4	157.933	5.32812	0.322383	16.5273	2.33429e-61	1.28848e-59	12351
Skint3	3.75888	5.31806	1.51648	3.50685	0.000453452	0.00169735	195564
Calcrl	737.97	5.30958	0.237042	22.3993	3.99944e-111	5.05709e-109	54598
6430503K07Rik	58.885	5.29975	0.479703	11.048	2.24223e-28	4.73574e-27	78068
Has2	75.6564	5.29924	0.601627	8.80818	1.27191e-18	1.7426e-17	15117
Cyp2j8	5.23357	5.29705	1.07937	4.90753	9.22316e-07	5.14643e-06	665095
Slc22a8	430.805	5.28118	0.662335	7.97357	1.54154e-15	1.80011e-14	19879
Hrct1	3.65387	5.27819	1.1294	4.67346	2.96164e-06	1.55749e-05	100039781
AU021092	247.134	5.27608	0.719727	7.33067	2.29012e-13	2.30806e-12	239691
C130074G19Rik	288.68	5.27497	0.684117	7.71063	1.25201e-14	1.36641e-13	226777
Igfbp7	406.15	5.25945	0.461579	11.3945	4.45483e-30	1.00841e-28	29817
Klri1	3.61491	5.25915	1.05249	4.99689	5.82623e-07	3.33128e-06	503550
B230323A14Rik	3.59136	5.25725	1.58704	3.31261	0.000924283	0.00327083	319970
Treml4	3.58997	5.25525	1.53004	3.4347	0.000593206	0.00217762	224840
Adgrl4	671.043	5.24999	0.390427	13.4468	3.21627e-41	1.05024e-39	170757
Dysf	142.837	5.24769	0.560532	9.36197	7.82641e-21	1.1949e-19	26903
Klhl4	81.0566	5.24716	0.428568	12.2435	1.82089e-34	4.84383e-33	237010
Mfsd2a	1132.27	5.24253	0.147655	35.5053	4.06846e-276	3.53869e-273	76574
Myadml2os	3.55304	5.23911	1.21813	4.30095	1.70067e-05	8.07784e-05	NA
1700047M11Rik	32.0031	5.23401	0.593204	8.82329	1.11148e-18	1.52644e-17	67330
Agtr1a	5.03906	5.23399	1.11636	4.68846	2.75268e-06	1.45346e-05	11607
Gm15966	3.56012	5.22782	0.937574	5.5759	2.46248e-08	1.63651e-07	NA
Slc16a9	53.8401	5.221	0.414841	12.5856	2.53565e-36	7.1494e-35	66859
Dusp9	10.0117	5.21972	0.908019	5.74847	9.00553e-09	6.2648e-08	75590
Unc45b	22.7405	5.19652	0.599362	8.67009	4.31781e-18	5.78321e-17	217012
Nipal1	4.87533	5.1934	1.35045	3.84567	0.000120222	0.00050134	70701
Clca2	3.44418	5.18957	1.32543	3.91538	9.02619e-05	0.000383764	229933
4632428C04Rik	3.42057	5.18488	1.20324	4.30912	1.63908e-05	7.80338e-05	100043102
Gm10863	178.535	5.17766	0.476695	10.8616	1.75716e-27	3.55431e-26	100041655
9830004L10Rik	3.40453	5.17703	1.30243	3.97489	7.04112e-05	0.000305844	100038658
Gm25694	4.79183	5.17224	1.04865	4.93229	8.12713e-07	4.56414e-06	NA
Prap1	3.36942	5.16361	0.950001	5.43537	5.46829e-08	3.49724e-07	22264
Vamp5	3.37178	5.16029	1.43341	3.60002	0.000318192	0.00122559	53620
She	88.0658	5.15752	0.631333	8.16925	3.10321e-16	3.79027e-15	214547
Gm13861	3.31636	5.14967	0.993504	5.18334	2.17945e-07	1.30462e-06	100039184
Gm33677	3.30774	5.14098	1.35929	3.7821	0.000155514	0.000635675	102636674
Gm6564	48.6031	5.13858	0.5486	9.36671	7.48283e-21	1.14427e-19	625219
Erp27	3.29211	5.13339	1.18612	4.32788	1.50555e-05	7.20588e-05	69187
Zfp469	2291.39	5.12775	0.12175	42.1171	0	0	195209
Ms4a14	3.27642	5.11904	1.57854	3.24289	0.00118324	0.00409829	383435
Meox1	53.8284	5.11889	0.936826	5.46408	4.65325e-08	2.99333e-07	17285
Mir503	4.64285	5.1162	0.99053	5.16511	2.40298e-07	1.43156e-06	723879
Gm15687	3.2616	5.10946	1.31003	3.90025	9.60934e-05	0.000406629	NA
9930038B18Rik	4.62488	5.10882	0.956207	5.34279	9.15264e-08	5.71477e-07	319503
Gm43923	4.60005	5.10597	1.00905	5.06019	4.18832e-07	2.43256e-06	NA
Tnnt2	4.60884	5.10505	1.14325	4.46536	7.99325e-06	3.98316e-05	21956
Art4	3.22832	5.10448	1.60436	3.18164	0.00146446	0.00497331	109978
Mmp8	4.56846	5.10057	1.20389	4.23675	2.26774e-05	0.000106081	17394
Rassf9	341.878	5.10057	0.555093	9.18868	3.97692e-20	5.88703e-19	237504
Cd300lb	4.53955	5.09265	1.0263	4.96214	6.97217e-07	3.94563e-06	217304
Tek	361.47	5.07827	0.603052	8.42096	3.73424e-17	4.81077e-16	21687
Gja4	32.9558	5.0687	0.554999	9.13281	6.67435e-20	9.78917e-19	14612
Gm7932	10.594	5.06582	0.816985	6.20063	5.62362e-10	4.3298e-09	666105
Mogat2	3.13479	5.06227	1.36541	3.70752	0.000209301	0.000836128	233549
Hsd11b1	6.30346	5.05556	1.06129	4.76361	1.90159e-06	1.02308e-05	15483
Gm19439	3.13202	5.05518	1.56828	3.22338	0.00126686	0.00435654	100502895
Cdh5	743.781	5.05043	0.605909	8.3353	7.73023e-17	9.75729e-16	12562
Gm41505	4.44562	5.04773	1.10086	4.58524	4.53459e-06	2.32713e-05	105246171
Kank1	1935.51	5.04411	0.213302	23.6478	1.24493e-123	1.8807e-121	107351
Gm42803	12.0861	5.04316	0.638954	7.89283	2.95403e-15	3.37292e-14	NA
Tbx4	26.7164	5.04282	0.722269	6.98192	2.91183e-12	2.7048e-11	21387
Egfl7	256.141	5.04272	0.454506	11.095	1.32719e-28	2.83441e-27	353156
Msr1	3.10504	5.04271	1.13953	4.42523	9.6338e-06	4.74304e-05	20288
Npr1	35.689	5.03511	0.495767	10.1562	3.1095e-24	5.50599e-23	18160
Gm22112	3.07964	5.02937	1.61206	3.11984	0.00180952	0.00601421	NA
Gm8925	7.37657	5.02855	0.834749	6.02402	1.70137e-09	1.25895e-08	668015
Pecam1	719.369	5.01997	0.41261	12.1664	4.6931e-34	1.22907e-32	18613
Icam2	56.5044	5.01917	0.491214	10.2179	1.6488e-24	2.95232e-23	15896
Gm28929	5.19958	5.01823	1.04889	4.78434	1.71553e-06	9.27146e-06	102639096
Sox18	83.0344	5.01809	0.571193	8.78528	1.55978e-18	2.12787e-17	20672
Cd34	493.107	5.0179	0.680342	7.37556	1.63657e-13	1.66399e-12	12490
Gm44108	3.03116	5.01479	1.54638	3.24293	0.00118309	0.00409825	NA
Gm48634	3.04388	5.01404	1.2954	3.87065	0.000108546	0.00045543	NA
Sncg	3.05435	5.01215	1.26793	3.95302	7.71718e-05	0.000332842	20618
H2-Ab1	6.09505	5.00107	0.911577	5.48618	4.10724e-08	2.66298e-07	14961
Apln	653.48	4.99377	0.309958	16.1111	2.13157e-58	1.08096e-56	30878
Gm31898	2.98608	4.9878	1.59649	3.12422	0.00178277	0.00593491	102634274
4930452G13Rik	4.23661	4.98566	1.31035	3.80483	0.000141902	0.000584113	73989
Ly75	480.51	4.98496	0.602042	8.28009	1.23081e-16	1.5427e-15	17076
Rpl29-ps2	5.03503	4.98436	1.22373	4.0731	4.6391e-05	0.000207408	432721
Gm15217	2.99601	4.98353	1.0168	4.90118	9.52649e-07	5.30749e-06	100041724
Abcb1a	338.212	4.98062	0.653821	7.61771	2.58209e-14	2.75209e-13	18671
Gm36001	2.95873	4.98058	1.16911	4.26013	2.04307e-05	9.61193e-05	102639769
Gm37024	2.9893	4.98046	1.58174	3.14872	0.00163984	0.00550122	NA
Gm15720	62.8312	4.97365	0.393858	12.628	1.47926e-36	4.20387e-35	NA
Gm10623	2.95658	4.97167	1.17742	4.22252	2.41588e-05	0.00011279	100038716
Sema3d	545.637	4.96646	0.318662	15.5853	9.15853e-55	4.31654e-53	108151
Gm14609	2.93096	4.95069	1.59525	3.10338	0.00191321	0.00632297	100417173
Myrf	715.206	4.94724	0.308912	16.015	1.00344e-57	5.04406e-56	225908
Gm33524	2.89624	4.94445	1.62247	3.04749	0.00230765	0.00749875	102636467
Krtap7-1	2.88714	4.94258	1.46636	3.37065	0.000749913	0.00270038	71363
BC049987	2.86927	4.93738	1.21522	4.06297	4.84526e-05	0.000215973	407815
Fam129a	139.532	4.93719	0.867375	5.6921	1.25483e-08	8.58986e-08	63913
Gm24302	2.89745	4.93491	1.32109	3.73548	0.00018736	0.00075478	NA
Gm14935	2.89372	4.93482	1.07974	4.57036	4.86887e-06	2.49111e-05	100417448
Gm9525	2.88675	4.93408	1.57969	3.12345	0.00178744	0.00594813	671242
Gm21846	412.112	4.92291	0.200369	24.5692	2.69982e-133	4.69655e-131	NA
Gm37221	11.9869	4.92008	0.857306	5.739	9.52373e-09	6.60928e-08	NA
Adgrf5	1629.53	4.92003	0.445194	11.0514	2.15761e-28	4.56038e-27	224792
Stfa2l1	6.87736	4.91866	1.27717	3.85121	0.000117534	0.000490988	268885
Krt80	9.26922	4.91776	0.807809	6.08777	1.14497e-09	8.59863e-09	74127
Gm36161	4.02774	4.91628	1.39863	3.51506	0.000439659	0.00165112	102639975
Emcn	58.9049	4.91583	0.826472	5.94796	2.71497e-09	1.97186e-08	59308
Gm20684	2.82926	4.91162	1.46672	3.34871	0.000811881	0.0029006	102641467
Gm12706	2.82236	4.91074	1.64347	2.98803	0.00280786	0.00896386	NA
Gm41231	2.81899	4.90889	1.31692	3.72756	0.000193342	0.00077713	105245842
Gm4804	4.01778	4.90743	1.10486	4.44167	8.92615e-06	4.4227e-05	217409
Gm25410	4.82194	4.90608	1.10893	4.42414	9.68266e-06	4.76464e-05	NA
En1	11.9987	4.90415	0.762339	6.43304	1.2508e-10	1.01618e-09	13798
Vxn	2817.42	4.89932	0.150759	32.4976	1.15246e-231	6.01436e-229	76982
Nkx2-2	421.384	4.89554	0.26099	18.7576	1.67888e-78	1.29889e-76	18088
Prl2c3	5.57927	4.89309	0.812301	6.02373	1.70438e-09	1.26085e-08	18812
Il2rg	21.2689	4.88987	0.588821	8.30452	1.00227e-16	1.26066e-15	16186
4933403O08Rik	5.58791	4.88777	0.844852	5.78536	7.23583e-09	5.07179e-08	71030
AL607088.1	3.93933	4.88232	0.980093	4.98149	6.3098e-07	3.59274e-06	NA
Gm15640	2.759	4.88156	1.3518	3.61116	0.000304826	0.00117726	NA
Gm17075	5.52507	4.87554	1.05057	4.64087	3.46951e-06	1.80637e-05	100416093
Gm14388	7.67756	4.87542	0.837266	5.82302	5.77919e-09	4.08471e-08	668486
Mroh3	90.9109	4.87534	0.315004	15.4771	4.95634e-54	2.2835e-52	76422
Unc45bos	3.92597	4.87336	1.2341	3.94893	7.8502e-05	0.00033802	100038761
Mmp25	87.1908	4.87298	0.613237	7.94632	1.92136e-15	2.23004e-14	240047
Gm47625	2.77489	4.87084	1.34129	3.63145	0.000281829	0.0010973	NA
Ptprb	2002.5	4.86914	0.438074	11.1149	1.0618e-28	2.2744e-27	19263
Nphs1	3.92143	4.86801	1.33114	3.65701	0.000255173	0.00100208	54631
Acpp	3.90543	4.86714	1.11688	4.35779	1.31381e-05	6.33679e-05	56318
4933417O13Rik	2.73875	4.86198	1.32473	3.67015	0.000242405	0.00095569	71153
Gm26574	7.28966	4.86029	0.867577	5.60215	2.11712e-08	1.41749e-07	102631965
Has2os	5.49361	4.85896	0.810726	5.99335	2.05566e-09	1.5075e-08	594843
Vmn2r27	2.71892	4.85689	1.63328	2.9737	0.00294229	0.00934725	232367
Gm32688	2.74621	4.85687	1.60261	3.0306	0.00244072	0.00789097	102635316
Gm27369	2.7229	4.85661	0.930107	5.22157	1.77416e-07	1.07117e-06	NA
Slc25a43	5.44505	4.8533	1.00648	4.82206	1.4208e-06	7.76047e-06	194744
Gm42599	2.70274	4.85062	1.49118	3.25287	0.00114246	0.00397238	NA
AC126944.1	3.83431	4.84462	0.824204	5.87794	4.15393e-09	2.96445e-08	NA
Ifi203-ps	2.70727	4.84022	1.20475	4.01762	5.87885e-05	0.000258924	100504287
Cdk18	58.5051	4.82559	0.419956	11.4907	1.46896e-30	3.38936e-29	18557
Foxb1	2.65982	4.82324	1.21866	3.9578	7.56418e-05	0.000326783	64290
Cyb5r2	3.19259	4.82218	1.16925	4.12415	3.72101e-05	0.00016894	320635
Slc27a6	46.2573	4.80599	0.427457	11.2432	2.50111e-29	5.45927e-28	225579
Gm42808	2.61984	4.79944	1.11973	4.28626	1.81704e-05	8.59502e-05	108169080
1700042O10Rik	2.63987	4.79564	1.21075	3.96089	7.46723e-05	0.000322886	73321
Gm30498	2.6092	4.7952	1.23239	3.89097	9.98456e-05	0.000421637	102632423
Gm45102	2.59187	4.79377	1.38197	3.4688	0.000522785	0.00193819	NA
Tafa1	67.5477	4.7933	0.338725	14.151	1.84099e-45	6.68886e-44	320265
Gm24877	2.59435	4.78573	1.60602	2.97987	0.00288373	0.00918257	NA
Mir1927	2.59873	4.78348	1.31066	3.64966	0.000262583	0.00102842	100316784
Kank4os	7.53243	4.78043	1.00721	4.74622	2.07249e-06	1.11003e-05	399570
Cd300ld	7.38498	4.77756	1.01311	4.71572	2.4086e-06	1.28192e-05	217305
Gm37444	5.22564	4.77718	0.853766	5.59542	2.20084e-08	1.46875e-07	NA
Cybb	41.7786	4.76265	1.08809	4.37709	1.20277e-05	5.8375e-05	13058
Gm7838	2.57637	4.76156	1.37905	3.45279	0.000554819	0.00204632	665886
Tlr5	18.6944	4.76058	0.632955	7.5212	5.42751e-14	5.68146e-13	53791
Sirpb1b	2.5179	4.75008	1.34658	3.52752	0.000419465	0.00158253	668101
Ccdc68	3.63079	4.74621	1.30617	3.63368	0.000279402	0.00108845	381175
Gm10220	11.9488	4.74053	0.60877	7.78707	6.85815e-15	7.62687e-14	434689
Gm42686	8.279	4.73858	1.00565	4.71196	2.45343e-06	1.30385e-05	NA
Acvrl1	157.711	4.73838	0.449478	10.542	5.53308e-26	1.04553e-24	11482
Gm10447	2.49651	4.72491	1.20853	3.90964	9.24349e-05	0.000392537	100038498
Mmp9	30.7505	4.72491	0.875903	5.39433	6.87787e-08	4.35507e-07	17395
Txk	4.97076	4.71901	1.01897	4.63116	3.63628e-06	1.88909e-05	22165
5430437J10Rik	2.94814	4.71322	1.25592	3.75279	0.000174877	0.000708749	71432
Xdh	10.0738	4.71184	0.938721	5.01942	5.18278e-07	2.98239e-06	22436
Itga4	585.474	4.70861	0.593736	7.93047	2.18319e-15	2.51967e-14	16401
Gm30906	2.45657	4.70574	1.33364	3.52848	0.000417949	0.00157743	102632964
Gm24482	2.4414	4.70557	1.12538	4.18132	2.89825e-05	0.00013343	NA
H2afb3	7.42239	4.70024	0.808588	5.81289	6.14022e-09	4.33135e-08	624957
Gm13594	3.45932	4.69668	1.53062	3.06848	0.00215147	0.00703907	108168763
Plpp4	123.4	4.69265	0.301058	15.5872	8.89412e-55	4.19882e-53	381925
Klk10	14.109	4.69251	0.761343	6.16346	7.11704e-10	5.42146e-09	69540
Ocln	168.911	4.6918	0.695262	6.74825	1.49644e-11	1.30992e-10	18260
4921513I03Rik	2.42548	4.6909	1.51388	3.0986	0.00194438	0.00641268	70874
Mir6364	2.43102	4.68937	1.51358	3.0982	0.00194701	0.00642062	102465188
Gm17202	2.41961	4.6888	1.49397	3.13847	0.0016983	0.00567939	102636836
Gm17745	2.44071	4.68788	1.50709	3.11055	0.00186739	0.00618507	432488
Gimap6	118.963	4.68656	0.490035	9.56373	1.13592e-21	1.79943e-20	231931
Gm49395	2.40831	4.67946	1.2537	3.73251	0.000189582	0.000762874	NA
Gm43180	2.42189	4.67841	1.33069	3.51579	0.000438454	0.00164703	NA
Flt4	287.378	4.67326	0.509485	9.17251	4.62136e-20	6.8094e-19	14257
1520401A03Rik	2.39137	4.6712	1.51888	3.07543	0.002102	0.00689293	320309
Ushbp1	150.155	4.6632	0.293581	15.8839	8.19476e-57	4.02764e-55	234395
Gm43704	2.37167	4.65924	1.34922	3.45328	0.000553806	0.00204317	NA
Gm44085	15.274	4.65428	0.572297	8.13262	4.20112e-16	5.09871e-15	NA
Cgnl1	768.829	4.65108	0.282022	16.4919	4.19421e-61	2.28437e-59	68178
Ugt8a	573.727	4.64615	0.135451	34.3012	7.53321e-258	4.91422e-255	22239
Gm14113	2.35803	4.64551	1.15695	4.01532	5.93647e-05	0.000261392	668920
Rep15	21.7643	4.64169	0.639688	7.25617	3.98193e-13	3.95479e-12	66532
Gm44532	2.34307	4.6376	1.36169	3.40576	0.0006598	0.00240394	NA
Mir6351	3.94279	4.62437	0.996288	4.6416	3.45717e-06	1.8006e-05	102465179
Gm44764	2.32094	4.62057	1.28516	3.59534	0.000323969	0.00124683	108169140
Mecom	171.688	4.61728	0.727569	6.34618	2.20733e-10	1.7565e-09	14013
Gm16299	6.59076	4.61571	0.850392	5.42775	5.70698e-08	3.64178e-07	102641509
Tie1	291.815	4.60813	0.629478	7.32056	2.46944e-13	2.48529e-12	21846
4930579O11Rik	3.30497	4.60263	1.15238	3.99403	6.49607e-05	0.000284103	75876
Psg17	12.7267	4.59808	0.78125	5.88554	3.96758e-09	2.84101e-08	26437
Slfn5	73.9023	4.59035	0.7563	6.06948	1.28323e-09	9.58434e-09	327978
Chrna4	805.804	4.58898	0.13937	32.9267	9.12614e-238	4.94241e-235	11438
Atp6v1e2	2.24695	4.58765	1.40675	3.26116	0.00110956	0.00386738	74915
1700040K01Rik	2.2688	4.58216	1.23062	3.72347	0.000196501	0.000788505	102631675
Gm30280	2.25047	4.57672	1.11252	4.11382	3.89159e-05	0.000176045	102632126
Gm49460	2.24368	4.57666	1.51511	3.02067	0.00252215	0.00813134	NA
Brinp3	884.798	4.57587	0.150073	30.4909	3.43945e-204	1.37115e-201	215378
Gm37611	2.22394	4.56203	1.15793	3.93982	8.15435e-05	0.000350276	NA
Wnt6	2.20624	4.55593	1.41325	3.22372	0.00126537	0.00435229	22420
Gm7591	16.3927	4.54657	0.660778	6.88063	5.95874e-12	5.37842e-11	665333
Gm7244	2.20111	4.54632	1.38115	3.29169	0.000995873	0.00350086	638580
Pirt	6.72236	4.54602	0.966913	4.70158	2.58158e-06	1.36739e-05	193003
Gm21680	25.806	4.54458	0.589257	7.7124	1.23476e-14	1.34903e-13	100862368
Fgfbp1	56.6953	4.54426	0.852592	5.32994	9.82447e-08	6.11261e-07	14181
T	4.51238	4.54295	1.21887	3.72717	0.000193646	0.000778005	20997
Gm15689	6.34956	4.54095	0.880912	5.15483	2.53859e-07	1.5086e-06	102635756
Slc6a19	7.76138	4.54063	0.921874	4.92544	8.41728e-07	4.71785e-06	74338
Ptger2	2.19268	4.5396	1.22381	3.7094	0.000207754	0.000830526	19217
Gm42767	3.14072	4.53956	1.03318	4.39377	1.11404e-05	5.42891e-05	NA
Sema3g	31.1216	4.53428	0.63461	7.14499	9.00039e-13	8.70999e-12	218877
Pdgfd	39.5503	4.53327	0.845773	5.35991	8.32613e-08	5.22714e-07	71785
Onecut3	3.74685	4.5325	1.18983	3.80937	0.000139321	0.000574395	246086
Gm20554	10.1945	4.52939	0.803235	5.63893	1.71106e-08	1.15586e-07	328287
Rnf43	295.042	4.52863	0.417922	10.8361	2.32255e-27	4.67162e-26	207742
Gm11770	3.13652	4.5262	1.37415	3.29383	0.000988335	0.00347734	105243647
Gm42449	8.84982	4.52257	0.880783	5.13472	2.82568e-07	1.67021e-06	NA
Shc4	647.187	4.51987	0.126257	35.7989	1.14681e-280	1.09723e-277	271849
Cxcl12	457.454	4.51798	0.502732	8.98685	2.54418e-19	3.61932e-18	20315
Arhgap29	539.203	4.50783	0.333997	13.4966	1.63777e-41	5.3663e-40	214137
Gm15408	2.11854	4.4999	1.3731	3.27717	0.00104852	0.00367111	100503307
Armc4	2.12074	4.49537	1.35273	3.32318	0.000889982	0.00315762	74934
3300005D01Rik	2.12569	4.49088	1.40251	3.20203	0.00136464	0.00466579	78512
Gm28631	2.12172	4.4839	1.51373	2.96214	0.00305506	0.00966168	NA
Gm26226	2.08552	4.47581	1.51006	2.964	0.00303669	0.00960995	NA
Cysltr2	3.56152	4.47266	1.44103	3.10379	0.0019106	0.00631507	70086
Bcl2a1a	2.07015	4.4631	1.21446	3.67498	0.000237872	0.0009398	12044
Cd38	44.9822	4.46177	0.775735	5.75166	8.83702e-09	6.15354e-08	12494
Ccm2l	56.3605	4.45926	0.63908	6.97763	3.00204e-12	2.78589e-11	228788
Serpine1	59.3153	4.45349	0.49392	9.01662	1.93983e-19	2.77978e-18	18787
Sh3tc2	46.7539	4.45253	0.539667	8.25052	1.5771e-16	1.96218e-15	225608
Plscr2	2.06995	4.44815	1.34761	3.30076	0.000964234	0.00339921	18828
C7	3.5181	4.44786	1.07056	4.15471	3.25701e-05	0.000149076	109828
5430440P10Rik	2.05696	4.44646	1.33374	3.33382	0.000856631	0.0030472	71362
Spry1	632.822	4.4419	0.219404	20.2454	3.90388e-91	3.83743e-89	24063
Mir7025	7.77691	4.4392	0.800066	5.54855	2.88055e-08	1.9007e-07	102465620
Tbx3	84.5425	4.43116	0.512942	8.63872	5.68487e-18	7.57886e-17	21386
Mylk4	11.2991	4.42838	0.708709	6.24851	4.14393e-10	3.22952e-09	238564
Slc39a8	486.105	4.42762	0.198545	22.3003	3.66745e-110	4.59681e-108	67547
Kcnq1	49.9079	4.42703	0.495167	8.94049	3.87441e-19	5.44866e-18	16535
Serpina9	4.08977	4.42646	1.02433	4.32131	1.55105e-05	7.41377e-05	71907
Gm34574	2.01876	4.42398	1.38487	3.19451	0.00140068	0.00477479	102637874
2310002F09Rik	2.88365	4.42387	1.15498	3.83025	0.000128013	0.000530748	100504720
Slc19a3	49.9839	4.42376	0.791024	5.59245	2.23887e-08	1.49239e-07	80721
Sox7	137.889	4.42068	0.515707	8.57207	1.01646e-17	1.33893e-16	20680
Ly6c1	25.289	4.41231	0.975103	4.52497	6.04034e-06	3.05723e-05	17067
Clec1a	39.6707	4.41228	0.781042	5.64922	1.61179e-08	1.09111e-07	243653
Adamtsl3	301.023	4.409	0.418567	10.5336	6.05045e-26	1.14254e-24	269959
Esam	315.591	4.40147	0.33359	13.1942	9.4703e-40	2.94503e-38	69524
Ifi208	3.39992	4.39985	1.25687	3.50064	0.000464142	0.00173467	100033459
Cavin1	535.202	4.397	0.324444	13.5524	7.66742e-42	2.53838e-40	19285
Nid1	1327.37	4.38908	0.352163	12.4632	1.18517e-35	3.27724e-34	18073
2600006K01Rik	8.89401	4.389	0.8561	5.12674	2.94808e-07	1.74041e-06	70319
Ccr1	2.80108	4.38802	1.47074	2.98354	0.00284935	0.0090852	12768
Dsc2	22.3283	4.38652	0.4782	9.17299	4.60061e-20	6.78229e-19	13506
Gm33027	35.0772	4.3847	0.596526	7.35039	1.97632e-13	2.00446e-12	102635775
Ostf1	606.391	4.38354	0.149202	29.3798	9.9382e-190	3.35595e-187	20409
Gata2	51.6715	4.38266	0.904306	4.84643	1.25701e-06	6.89996e-06	14461
Gm36372	2.36766	4.38206	1.43207	3.05994	0.00221379	0.00721908	102640260
Lrrn4	17.0018	4.38195	0.624358	7.01833	2.2454e-12	2.10414e-11	320974
Gm25968	1.95397	4.37553	1.04861	4.17268	3.01041e-05	0.000138275	NA
Stk32a	814.179	4.37378	0.0878827	49.7684	0	0	269019
Samd9l	109.851	4.35893	0.226996	19.2027	3.51468e-82	2.90726e-80	209086
Atp10b	322.417	4.35749	0.347089	12.5544	3.76187e-36	1.05446e-34	319767
Gm8522	3.95379	4.35512	1.40075	3.10912	0.00187642	0.00621211	667218
Itpr2	4115.49	4.34943	0.149617	29.0705	8.47271e-186	2.64339e-183	16439
Pla1a	1.91392	4.34783	1.43692	3.0258	0.00247975	0.00800813	85031
Vwa1	325.279	4.34692	0.464962	9.34897	8.85013e-21	1.34619e-19	246228
Gm48950	27.6981	4.34308	0.479546	9.05666	1.34506e-19	1.94006e-18	NA
Gm15584	19.4994	4.34036	0.583907	7.43331	1.05912e-13	1.08571e-12	NA
Dmrta1	169.857	4.33991	0.257992	16.8219	1.68708e-63	9.68484e-62	242523
Osmr	161.255	4.33641	0.314829	13.7739	3.66162e-43	1.24821e-41	18414
Mc5r	87.715	4.32515	0.370327	11.6793	1.62666e-31	3.88759e-30	17203
Tdrp	250.868	4.32253	0.523284	8.26038	1.4521e-16	1.81059e-15	72148
Slc9a2	6.81	4.3202	0.747695	5.77802	7.5585e-09	5.2915e-08	226999
Gm32005	5.65191	4.31889	1.17051	3.68974	0.000224484	0.000890337	102634420
Aplnr	148.288	4.31194	0.637371	6.7652	1.33125e-11	1.16924e-10	23796
Mir763	1.8735	4.30796	1.40607	3.06384	0.00218515	0.00713459	791076
Gm18811	1.85567	4.30737	1.41087	3.053	0.00226569	0.00737074	100417761
Gm19434	3.83434	4.30157	1.14045	3.77182	0.000162059	0.000659987	100502888
Elfn1	748.411	4.29729	0.15929	26.9777	2.69849e-160	6.29714e-158	243312
Pxdc1	136.257	4.29425	0.311716	13.7761	3.54774e-43	1.21083e-41	66895
5033406O09Rik	1.85605	4.29163	1.04618	4.10219	4.09267e-05	0.000184588	77675
Psma8	6.22488	4.27632	0.923908	4.62852	3.68296e-06	1.91126e-05	73677
Gpr132	5.28556	4.2723	1.22557	3.48596	0.000490376	0.00182748	56696
Gm30132	1.80843	4.26835	1.15381	3.69934	0.000216161	0.000859793	102631922
1700034J05Rik	78.1232	4.26286	0.686459	6.20993	5.30075e-10	4.09109e-09	73344
Gm25355	7.22982	4.26138	0.968608	4.39948	1.08508e-05	5.29769e-05	NA
Adcy4	77.6212	4.26048	0.70301	6.06034	1.35831e-09	1.01214e-08	104110
Gm42864	6.67934	4.25647	1.02615	4.148	3.35388e-05	0.000153339	NA
Ramp2	330.034	4.25034	0.314076	13.5328	1.00088e-41	3.30589e-40	54409
Gm28730	2.55191	4.24238	1.20155	3.53074	0.000414393	0.00156463	NA
St8sia6	17.5556	4.24215	0.537681	7.88972	3.02863e-15	3.45374e-14	241230
Gm27749	8.99889	4.22969	0.843302	5.01563	5.286e-07	3.03874e-06	NA
Gm5711	2.53159	4.22457	1.30092	3.24736	0.00116481	0.00403837	435753
2410080I02Rik	2.5723	4.22417	1.153	3.66363	0.000248665	0.000978399	102636896
Hpn	2.49403	4.21735	1.178	3.5801	0.000343457	0.00131654	15451
Depp1	11.6418	4.21534	0.726754	5.80023	6.62257e-09	4.66015e-08	213393
Gm21168	38.4536	4.21165	0.53562	7.86313	3.74657e-15	4.24212e-14	100861728
Plaur	20.5264	4.20734	0.524429	8.02271	1.03435e-15	1.22429e-14	18793
Gata3	3.57729	4.20726	1.05687	3.98087	6.86643e-05	0.000299115	14462
Slc40a1	425.414	4.20324	0.296984	14.1531	1.78728e-45	6.51018e-44	53945
Procr	10.7746	4.18853	0.832863	5.02907	4.92866e-07	2.84413e-06	19124
Sytl2	138.746	4.18271	0.328744	12.7233	4.38885e-37	1.26606e-35	83671
Cobll1	514.16	4.17888	0.164612	25.3863	3.57326e-142	6.70348e-140	319876
Gm20319	2.04947	4.17363	1.3143	3.17555	0.00149555	0.00506451	100504628
Cdh3	1.69186	4.17179	1.17637	3.54631	0.000390672	0.00148322	12560
Ptpn14	366.346	4.16154	0.223816	18.5936	3.62189e-77	2.73576e-75	19250
Gm42496	23.6658	4.15881	0.63762	6.52239	6.91971e-11	5.73208e-10	NA
Meox2	2.40636	4.15082	1.00726	4.1209	3.77398e-05	0.000171129	17286
4930456G14Rik	2.43996	4.1501	1.3182	3.14832	0.00164211	0.00550752	74678
Eva1b	32.032	4.14451	0.569154	7.28187	3.29222e-13	3.28684e-12	230752
Mcam	329.783	4.14218	0.378025	10.9574	6.12228e-28	1.26971e-26	84004
Enpp2	1830.58	4.13357	0.154755	26.7103	3.56909e-157	8.13044e-155	18606
Spn	18.2182	4.12576	0.823111	5.01239	5.37577e-07	3.08848e-06	20737
Gm42948	91.5418	4.12368	0.648293	6.36082	2.00679e-10	1.60091e-09	NA
Gm37393	17.3638	4.12127	0.655059	6.29146	3.14501e-10	2.47318e-09	NA
Scarf1	63.4806	4.11979	0.656192	6.27833	3.42222e-10	2.68456e-09	380713
Gipc3	8.76296	4.11517	0.674182	6.10394	1.03487e-09	7.79629e-09	209047
F5	14.6132	4.11443	0.74914	5.49221	3.96932e-08	2.58113e-07	14067
A330049N07Rik	3.3351	4.1126	1.11136	3.70051	0.000215168	0.000856583	327768
Sostdc1	8.99415	4.1123	0.966114	4.25653	2.0762e-05	9.75718e-05	66042
Gm9812	2.35729	4.11097	1.17807	3.48959	0.000483761	0.00180424	NA
Gm33680	99.9451	4.10378	0.684821	5.99249	2.06656e-09	1.51472e-08	102636677
Gm40909	21.546	4.09972	0.698467	5.8696	4.36852e-09	3.11372e-08	105245459
Gm48569	2.31362	4.09399	1.38606	2.95369	0.00314003	0.00989658	NA
1700041B01Rik	1.60702	4.09227	1.20587	3.39363	0.000689729	0.00250187	78623
Srgn	85.8326	4.08391	0.923249	4.42341	9.71542e-06	4.77912e-05	19073
Insc	9.71334	4.08308	0.743661	5.49052	4.00752e-08	2.60185e-07	233752
Gm22390	8.81175	4.07108	1.00127	4.06591	4.78459e-05	0.00021348	NA
S100b	123.809	4.06828	0.457569	8.89108	6.05183e-19	8.43642e-18	20203
Esm1	14.8053	4.06069	0.903085	4.49647	6.90913e-06	3.4664e-05	71690
Steap4	3.23684	4.05738	1.3237	3.06519	0.00217534	0.00710663	117167
Fam124b	46.5325	4.05541	0.869587	4.6636	3.10722e-06	1.62779e-05	241128
Gm37830	9.0105	4.05368	0.78018	5.19583	2.03812e-07	1.22411e-06	NA
Tbxa2r	6.49324	4.05254	0.712081	5.69112	1.2621e-08	8.63758e-08	21390
Arhgef5	251.785	4.04406	0.433925	9.31972	1.16646e-20	1.76495e-19	54324
Abcc6	43.3987	4.04164	0.807315	5.00628	5.54933e-07	3.18247e-06	27421
Erg	224.977	4.03885	0.25836	15.6326	4.36392e-55	2.07724e-53	13876
Gm29502	42.5056	4.03454	0.370107	10.901	1.13969e-27	2.33327e-26	NA
Rspo1	6.23902	4.03439	1.09898	3.67104	0.000241564	0.000953205	192199
4933401H06Rik	1.54916	4.02717	1.32229	3.04561	0.00232207	0.0075405	71038
Tnfsf10	7.19415	4.02385	0.780849	5.15317	2.56113e-07	1.52104e-06	22035
Gm34280	8.84424	4.0185	0.65164	6.16675	6.97086e-10	5.31716e-09	102637485
Plp1	1630.84	4.01784	0.16805	23.9086	2.49569e-126	3.93592e-124	18823
Ttc6	5.84589	4.01609	1.06777	3.76118	0.000169115	0.000686383	70846
Gm47345	4.03945	4.01054	1.25194	3.20345	0.0013579	0.0046455	NA
Gm50078	3.11283	4.00931	1.25168	3.20314	0.00135936	0.00464941	NA
Lgi3	68.2974	4.00739	0.367694	10.8987	1.1689e-27	2.38966e-26	213469
Ptgs2	7.05822	4.0022	0.929101	4.3076	1.65033e-05	7.85173e-05	19225
Prss56	4.02787	3.99735	1.10724	3.61018	0.000305979	0.00118124	69453
Serpinb9	20.8497	3.99417	0.584349	6.83525	8.18622e-12	7.30398e-11	20723
Vwa2	16.4751	3.99136	0.567045	7.03888	1.93791e-12	1.82853e-11	240675
Mmrn2	175.816	3.99043	0.393542	10.1398	3.67923e-24	6.49877e-23	105450
Gm48996	16.4967	3.98066	0.81024	4.91294	8.97197e-07	5.01407e-06	NA
Chp2	23.592	3.97987	0.709409	5.61012	2.0219e-08	1.35658e-07	70261
Gm36932	15.6734	3.97794	0.615072	6.46743	9.96836e-11	8.1586e-10	NA
Col19a1	148.034	3.97054	0.62735	6.32907	2.46641e-10	1.95561e-09	12823
Tnr	10766.7	3.96594	0.136069	29.1465	9.25594e-187	2.91949e-184	21960
Rtl4	11.5294	3.96558	0.622474	6.37068	1.88191e-10	1.50534e-09	619287
Rhod	17.4105	3.96469	0.576512	6.87704	6.11098e-12	5.50718e-11	11854
Gm17222	3.07691	3.96347	1.08846	3.64137	0.000271195	0.00105942	100417758
Gatm	694.935	3.96177	0.293095	13.517	1.24121e-41	4.08091e-40	67092
Mal	34.7315	3.95594	1.00081	3.95275	7.7258e-05	0.000333163	17153
Akr1c14	21.9218	3.94514	0.718957	5.48732	4.08086e-08	2.64647e-07	105387
Anxa1	31.8592	3.94409	0.696707	5.66104	1.50456e-08	1.02117e-07	16952
Gm29491	3.6901	3.94153	1.25595	3.13828	0.00169942	0.00568249	NA
A230059L01Rik	38.3982	3.93922	0.49404	7.97349	1.54253e-15	1.80054e-14	320260
9230104M06Rik	2.47549	3.93914	1.24415	3.16614	0.00154479	0.00521526	791402
Adgre5	156.76	3.92772	0.252655	15.5458	1.69963e-54	7.93246e-53	26364
Pcdh12	193.936	3.92747	1.00107	3.92326	8.73579e-05	0.000372631	53601
Mndal	7.40936	3.91843	0.78522	4.99023	6.03077e-07	3.44069e-06	100040462
Gm37066	9.53565	3.91637	0.741441	5.28211	1.27707e-07	7.85088e-07	NA
Pmepa1os	2.94266	3.9154	1.10854	3.53202	0.000412405	0.00155774	NA
Gm17087	13.2872	3.90468	0.51172	7.63052	2.33816e-14	2.4986e-13	100416032
F2rl1	3.59966	3.90451	1.09924	3.552	0.000382315	0.00145403	14063
Slco2a1	49.4487	3.90422	0.52362	7.45621	8.90465e-14	9.16751e-13	24059
Tmem26	44.5825	3.89571	0.558593	6.97415	3.07732e-12	2.85298e-11	327766
Tbx3os1	6.01327	3.89516	0.898024	4.33748	1.44128e-05	6.91329e-05	100039542
Fn1	5647.77	3.89353	0.248076	15.6949	1.6393e-55	7.89478e-54	14268
Itm2a	415.52	3.89171	0.366961	10.6053	2.81701e-26	5.41571e-25	16431
Cdrt4	4.69528	3.89133	1.10578	3.51909	0.000433036	0.00162817	66338
Gm30085	5.67811	3.89091	0.888234	4.3805	1.18409e-05	5.74979e-05	102631859
Gjb2	5.77283	3.88882	0.984391	3.95048	7.79933e-05	0.000336132	14619
Rarres1	26.1733	3.88594	0.580279	6.69666	2.13233e-11	1.84295e-10	109222
Gm44731	3.39699	3.88212	0.915356	4.2411	2.22427e-05	0.000104132	NA
Pdgfb	247.746	3.87724	0.328066	11.8185	3.13234e-32	7.7174e-31	18591
Fat2	6.81728	3.8757	1.22403	3.16635	0.00154362	0.00521193	245827
Rab38	3.92238	3.87308	1.21918	3.17679	0.00148917	0.00504707	72433
Pear1	94.4477	3.87095	0.360765	10.7298	7.37293e-27	1.45647e-25	73182
Gm38197	15.0287	3.86645	0.660807	5.8511	4.88333e-09	3.46774e-08	NA
Serpinb6b	41.9679	3.86479	0.86041	4.4918	7.0623e-06	3.53768e-05	20708
Ly6a	8.05809	3.86133	0.862495	4.47693	7.57231e-06	3.78062e-05	110454
Lnx1	448.391	3.85269	0.198795	19.3803	1.13263e-83	9.76273e-82	16924
Foxs1	10.1179	3.85083	0.738015	5.21782	1.81041e-07	1.09238e-06	14239
Itga1	752.319	3.84931	0.422714	9.10617	8.53449e-20	1.24601e-18	109700
Lama4	1396.23	3.84821	0.265183	14.5115	1.02474e-47	3.97473e-46	16775
Gm43214	2.38765	3.84752	0.991964	3.87869	0.000105021	0.000441545	NA
Epha2	60.3528	3.8448	0.415392	9.25584	2.1256e-20	3.1843e-19	13836
Brs3	2.79955	3.84381	1.30041	2.95584	0.0031182	0.00983536	12209
Slc16a1	1984.68	3.84156	0.302393	12.7039	5.6286e-37	1.61881e-35	20501
Inava	352.134	3.83873	0.192104	19.9826	7.80408e-89	7.36844e-87	67313
Gm5822	20.4029	3.83734	0.49797	7.70598	1.29847e-14	1.41334e-13	545262
Srms	3.96208	3.83707	1.0067	3.81155	0.000138099	0.0005696	20811
Nos3	157.417	3.83601	0.285592	13.4318	3.93951e-41	1.27914e-39	18127
Olig1	3755.83	3.83414	0.132273	28.9866	9.72104e-185	3.00025e-182	50914
1700006J14Rik	14.1543	3.82955	0.804551	4.75986	1.93731e-06	1.04054e-05	321010
Edn1	42.4494	3.82444	0.57219	6.68386	2.32732e-11	2.00309e-10	13614
Gm49616	14.3366	3.82341	0.82175	4.65277	3.2751e-06	1.71199e-05	NA
Pik3r6	90.8725	3.82103	0.38098	10.0295	1.13134e-23	1.94541e-22	104709
Irx3	8.07593	3.81734	0.652017	5.85466	4.77974e-09	3.39838e-08	16373
Resp18	43.4367	3.81582	0.454724	8.39152	4.799e-17	6.12748e-16	19711
Pcdh15	4604.52	3.81578	0.0862923	44.2193	0	0	11994
Pllp	56.6745	3.8157	0.374063	10.2007	1.96845e-24	3.51371e-23	67801
Igsf5	10.3405	3.81308	0.704097	5.41556	6.10965e-08	3.89009e-07	72058
Gm23654	3.13845	3.81153	1.21125	3.14677	0.00165083	0.00553548	NA
Xaf1	15.806	3.80879	0.69572	5.4746	4.385e-08	2.82838e-07	327959
5830432E09Rik	122.19	3.80701	0.608606	6.25529	3.96782e-10	3.09816e-09	67765
Gm23946	2.78562	3.80581	1.25093	3.04238	0.00234719	0.0076169	NA
Sigirr	11.7464	3.80492	0.850686	4.47277	7.72117e-06	3.85026e-05	24058
Ror1	31.2422	3.80411	0.593031	6.41469	1.41106e-10	1.14185e-09	26563
Morrbid	19.7139	3.79994	0.605076	6.2801	3.38353e-10	2.65566e-09	100043424
Gng11	54.9037	3.7971	0.45169	8.40642	4.22701e-17	5.42369e-16	66066
Col5a3	151.551	3.79472	0.24867	15.2601	1.41086e-52	6.21105e-51	53867
Gm17160	6.26366	3.79258	0.75697	5.01022	5.43689e-07	3.1211e-06	NA
Angptl8	11.0959	3.79184	0.555385	6.82741	8.64588e-12	7.70931e-11	624219
Fam43a	160.11	3.78981	0.41909	9.04293	1.52522e-19	2.19331e-18	224093
Arhgap31	3167.44	3.78954	0.105539	35.9066	2.41222e-282	2.47279e-279	12549
Ido2	7.47033	3.78401	0.951993	3.97484	7.0428e-05	0.00030587	209176
Ephx4	22.7442	3.78141	0.554193	6.82327	8.89913e-12	7.92774e-11	384214
Gm31793	4.61208	3.77626	1.12635	3.35266	0.000800391	0.00286347	102634137
Dmrtb1	132.396	3.77261	0.292761	12.8863	5.3752e-38	1.5988e-36	56296
Fgf2os	2.62073	3.77214	1.2035	3.13431	0.00172262	0.00574866	329626
Gm44086	47.8579	3.77193	0.539521	6.99126	2.72432e-12	2.54214e-11	NA
Rtn4rl2	6.63175	3.76598	0.75702	4.97475	6.53332e-07	3.70898e-06	269295
Gm23030	28.8259	3.7564	0.571712	6.57045	5.01648e-11	4.19423e-10	NA
Kcnj16	331.594	3.7556	0.322979	11.628	2.96987e-31	7.02177e-30	16517
4930445B16Rik	13.4261	3.75554	0.579085	6.48531	8.85506e-11	7.27438e-10	74880
Gm25026	6.45553	3.75025	0.980284	3.82568	0.000130411	0.000540063	NA
Fgr	17.6037	3.74859	1.1363	3.29894	0.000970506	0.00341844	14191
Gm7042	4.66762	3.74811	0.773393	4.84632	1.2577e-06	6.90242e-06	630757
9330188P03Rik	218.173	3.74807	0.481391	7.78591	6.92121e-15	7.69104e-14	380930
Ifi207	6.46589	3.74626	1.24333	3.01309	0.00258604	0.00831677	226691
Gpr37l1	462.439	3.73669	0.188754	19.7966	3.18384e-87	2.89196e-85	171469
Gm16082	18.9249	3.73653	0.725572	5.14977	2.60809e-07	1.54797e-06	108168161
Gm16205	4.2653	3.73377	1.25075	2.98522	0.00283371	0.00903934	436033
Gm36325	38.3045	3.73278	0.776695	4.80598	1.53997e-06	8.37948e-06	102640201
Gm36146	24.6921	3.73144	0.510494	7.30947	2.68198e-13	2.69258e-12	102639955
Gm41492	16.7063	3.72916	0.673974	5.53309	3.1463e-08	2.07224e-07	105246158
Mmp15	3868.38	3.72479	0.0929336	40.0801	0	0	17388
Tmem255a	179.508	3.7247	0.251067	14.8355	8.63788e-50	3.53181e-48	245386
Ces2b	6.9216	3.72166	0.927592	4.01217	6.01625e-05	0.000264525	234669
Ppfibp1	2511.13	3.71889	0.106537	34.907	5.8233e-267	4.39859e-264	67533
Mbp	1813.89	3.71198	0.158785	23.3774	7.25821e-121	1.04166e-118	17196
Gm49808	3.33928	3.70935	1.12913	3.28515	0.00101927	0.00357654	NA
Gm15941	129.301	3.7072	0.233253	15.8935	7.03122e-57	3.46656e-55	100503538
Ptpre	1294.97	3.70491	0.130812	28.3223	1.83415e-176	5.31774e-174	19267
Muc3a	9.95742	3.70455	0.815139	4.54468	5.50179e-06	2.79996e-05	619309
Gm36486	3.37637	3.70057	1.19484	3.09712	0.00195408	0.00644246	102640422
Gm16202	1.82627	3.69715	1.14089	3.24059	0.00119281	0.00412696	100416091
Lor	130.792	3.69526	0.455299	8.11612	4.81338e-16	5.80986e-15	16939
AC110180.1	7.46879	3.68113	0.927217	3.97008	7.18481e-05	0.000311707	NA
Foxd1	5.77722	3.67989	0.984826	3.73659	0.000186535	0.000751878	15229
Olfr1372-ps1	43.0029	3.67924	0.319273	11.5238	1.00075e-30	2.32399e-29	257871
Stap2	62.0093	3.67892	0.337443	10.9024	1.12315e-27	2.30105e-26	106766
Gm49950	3.36261	3.66533	1.17782	3.11195	0.00185856	0.00616009	NA
Gm9796	8.12301	3.66381	1.04106	3.51931	0.000432679	0.00162789	544809
Gm45600	3.01883	3.66161	1.11077	3.29645	0.000979152	0.00344672	NA
Gm2788	5.80826	3.654	1.01646	3.59483	0.000324608	0.00124896	108167326
Tmod1	29.7256	3.64341	0.52541	6.93442	4.07902e-12	3.75497e-11	21916
Rhoj	170.618	3.64023	0.413927	8.79439	1.43831e-18	1.96497e-17	80837
Hspg2	1703.62	3.63901	0.178297	20.4099	1.36697e-92	1.3767e-90	15530
Galnt6	24.9278	3.63778	0.603272	6.03008	1.6388e-09	1.21358e-08	207839
F10	5.8886	3.63138	0.799569	4.54168	5.58082e-06	2.83666e-05	14058
4933431K23Rik	5.35326	3.62674	1.16117	3.12336	0.00178798	0.00594813	74475
Efemp1	6.87798	3.62398	0.944325	3.83764	0.000124224	0.000516678	216616
BC028528	20.1026	3.61828	0.663383	5.45428	4.91708e-08	3.15738e-07	229600
Sulf2	4762.65	3.61772	0.106268	34.0433	5.10591e-254	3.18598e-251	72043
5330416C01Rik	119.895	3.60926	0.236847	15.2388	1.95368e-52	8.54822e-51	403201
Fcgr4	5.23825	3.60878	1.08357	3.33047	0.000867006	0.00308105	246256
Gm15979	4.77432	3.60483	0.971606	3.71018	0.000207112	0.000828304	NA
Chst7	63.5369	3.60405	0.321936	11.1949	4.31852e-29	9.36919e-28	60322
Msrb3	200.704	3.60185	0.361102	9.9746	1.96894e-23	3.34999e-22	320183
Gm37824	22.4223	3.60033	0.575413	6.25695	3.92587e-10	3.06707e-09	NA
Drd5	9.05338	3.59967	0.976514	3.68625	0.000227583	0.000901755	13492
Clec14a	136.347	3.59724	0.430703	8.35201	6.71113e-17	8.51213e-16	66864
Gm5862	12.1193	3.59378	0.58029	6.19307	5.90019e-10	4.53058e-09	545739
0610040J01Rik	135.513	3.59141	0.310127	11.5804	5.17749e-31	1.21314e-29	76261
Cp	174.793	3.59133	0.304444	11.7964	4.0759e-32	1.00077e-30	12870
Egr2	6.82589	3.59065	1.11646	3.21611	0.00129941	0.00445975	13654
Efna1	57.0239	3.58875	0.356444	10.0682	7.63646e-24	1.32441e-22	13636
Gm37145	7.0417	3.56202	1.00677	3.53807	0.000403064	0.00152506	NA
Gm38263	32.2672	3.56131	0.445992	7.98512	1.40381e-15	1.64665e-14	NA
Gm15587	21.4302	3.56043	0.62999	5.65156	1.58996e-08	1.07735e-07	NA
Gm18300	4.64758	3.55214	1.06401	3.33845	0.000842479	0.00300095	100416882
Ism2	15.6414	3.54652	0.752097	4.71551	2.41112e-06	1.28279e-05	217738
Lpo	67.597	3.53938	0.350854	10.0879	6.2491e-24	1.08576e-22	76113
Gm10463	2.99675	3.53371	1.06744	3.31045	0.000931462	0.0032942	100038629
Spry4	1283.25	3.52668	0.22125	15.9398	3.35249e-57	1.65908e-55	24066
Tagln2	386.724	3.5221	0.199375	17.6657	7.70898e-70	5.12201e-68	21346
Gm13462	4.59326	3.5216	0.953128	3.69478	0.00022008	0.000874926	100418156
Rnf144b	194.928	3.51933	0.4047	8.69615	3.43347e-18	4.61597e-17	218215
Lepr	46.0426	3.51824	0.511369	6.88003	5.98401e-12	5.39783e-11	16847
Flvcr2	152.565	3.51656	0.2526	13.9214	4.69514e-44	1.64347e-42	217721
Ddc	70.958	3.5109	0.468009	7.50178	6.29582e-14	6.5498e-13	13195
Armh4	1111.3	3.48682	0.0984829	35.4054	1.41086e-274	1.12489e-271	67419
Epx	8.83613	3.48199	0.849436	4.09918	4.14608e-05	0.00018685	13861
Cyp27a1	5.29187	3.47519	1.11557	3.11517	0.00183837	0.00610162	104086
AC141633.1	4.77135	3.46658	1.02969	3.36661	0.000760981	0.00273544	NA
Gm14114	12.1437	3.45767	0.796489	4.34114	1.41748e-05	6.80367e-05	102638638
Speer4a	46.3375	3.45316	0.432606	7.98223	1.43716e-15	1.6837e-14	75657
Gm15530	63.447	3.45281	0.341797	10.1019	5.41678e-24	9.4688e-23	100417700
Htra3	326.041	3.45236	0.374873	9.20941	3.27914e-20	4.86918e-19	78558
Mlkl	22.7239	3.44989	0.656869	5.25203	1.50434e-07	9.16754e-07	74568
Scn7a	36.0418	3.44365	0.572735	6.01263	1.82537e-09	1.34688e-08	20272
Rbm11	31.2404	3.44316	0.605111	5.69014	1.26938e-08	8.68331e-08	224344
Egflam	76.7597	3.43976	0.449442	7.65341	1.95722e-14	2.10326e-13	268780
Gm43581	53.0172	3.43536	0.307111	11.1861	4.77072e-29	1.03269e-27	NA
AC137513.1	14.856	3.43132	0.794392	4.31943	1.56435e-05	7.47238e-05	NA
Il1rap	585.301	3.43122	0.162374	21.1316	4.07913e-99	4.40163e-97	16180
Gabrq	108.204	3.42539	0.353386	9.69306	3.22721e-22	5.25415e-21	57249
Tmem37	10.8596	3.42261	1.03762	3.29854	0.000971899	0.00342245	170706
Gm16867	4.42649	3.42175	0.781986	4.37572	1.21035e-05	5.87231e-05	100862085
Igfbp3	277.091	3.41771	0.184114	18.563	6.40386e-77	4.81178e-75	16009
B3gnt2	12.6158	3.40671	0.57846	5.88928	3.87878e-09	2.78123e-08	53625
Gm26588	36.4928	3.4057	0.516279	6.59664	4.20583e-11	3.53604e-10	102639841
Syt12	43.3412	3.40549	0.430449	7.91148	2.54356e-15	2.92148e-14	171180
Kcnj2	334.988	3.3984	0.216534	15.6945	1.64928e-55	7.92952e-54	16518
Gm13690	4.78385	3.39381	0.921855	3.6815	0.000231865	0.000917328	672381
Scrg1	249.413	3.39343	0.218042	15.5632	1.29475e-54	6.08236e-53	20284
6030443J06Rik	259.626	3.39201	0.170882	19.85	1.10115e-87	1.00989e-85	320719
Gm47105	3.38986	3.39163	1.14902	2.95175	0.0031598	0.00994501	NA
Gm43820	36.4773	3.38482	0.471565	7.17785	7.0815e-13	6.8972e-12	NA
Gpihbp1	5.09408	3.38408	1.00989	3.35096	0.000805333	0.00287936	68453
Gm15647	5.59042	3.37372	0.787942	4.28168	1.85484e-05	8.76512e-05	NA
Gm48948	43.0894	3.37332	0.501334	6.72868	1.71207e-11	1.4914e-10	NA
Gm44264	4.24279	3.37199	1.06037	3.18	0.00147274	0.00499846	NA
B9d1os	241.82	3.36702	0.188081	17.9019	1.13881e-71	7.8199e-70	73216
Gm13708	10.4902	3.36517	0.784604	4.28901	1.79474e-05	8.49373e-05	NA
1700018A04Rik	10.9481	3.35768	0.80695	4.16095	3.16923e-05	0.000145291	71307
Syt15	22.2984	3.35697	0.511857	6.55842	5.43793e-11	4.53604e-10	319508
Serpine2	4751.05	3.35579	0.130837	25.6487	4.37166e-145	8.47835e-143	20720
Gm44751	9.31246	3.34789	0.844606	3.96385	7.37516e-05	0.000319242	NA
Gm43422	3.34599	3.34554	1.09007	3.06912	0.00214691	0.00702574	NA
Rasl11a	157.759	3.34454	0.149421	22.3834	5.71166e-111	7.19042e-109	68895
Gm29514	15.6376	3.33875	0.648828	5.14582	2.6636e-07	1.57994e-06	102639375
Gm15850	11.5366	3.33813	0.547708	6.09472	1.09627e-09	8.23937e-09	329253
Myh11	76.3394	3.33405	0.534594	6.2366	4.4718e-10	3.47278e-09	17880
Gm15606	77.4691	3.33279	0.253662	13.1387	1.97696e-39	6.08197e-38	NA
Hic1	63.4318	3.3316	0.423985	7.85782	3.90874e-15	4.42051e-14	15248
Carmn	8.92305	3.33083	0.841397	3.95869	7.53606e-05	0.000325666	328968
Rab11fip1	104.696	3.33072	0.453417	7.34583	2.04487e-13	2.0696e-12	75767
Gm38577	3.67545	3.32653	0.986897	3.3707	0.000749787	0.00270027	102641825
Usp18	9.21326	3.32026	0.811042	4.09382	4.24318e-05	0.000190867	24110
Gm45472	9.27551	3.31849	0.802201	4.13673	3.52294e-05	0.000160353	NA
C1ql2	33.751	3.31841	0.84035	3.94884	7.85299e-05	0.00033809	226359
Slc14a1	11.92	3.31785	0.668601	4.96237	6.96371e-07	3.9424e-06	108052
Gm29521	91.0861	3.31722	0.304988	10.8765	1.49116e-27	3.03337e-26	102633238
Amz1	342.812	3.31552	0.165531	20.0296	3.04316e-89	2.89232e-87	231842
Apold1	123.435	3.31419	0.464697	7.13193	9.89707e-13	9.53914e-12	381823
Lad1	7.17031	3.31079	0.950368	3.48369	0.000494548	0.00184279	16763
Gm25260	2.37452	3.30904	1.0827	3.05628	0.00224102	0.00730124	NA
Olfr1510	4.53352	3.30306	1.09932	3.00463	0.00265903	0.00853192	258423
Mfsd7a	6.20991	3.29571	1.03696	3.17825	0.00148167	0.00502402	243197
A930003O13Rik	78.3652	3.29512	0.401155	8.21407	2.13806e-16	2.64521e-15	330052
Gm47127	8.68203	3.29019	0.705199	4.66562	3.07692e-06	1.61368e-05	NA
Gm8894	3.7341	3.2862	1.09189	3.00964	0.00261555	0.00840602	667952
Gm11799	43.0911	3.28538	0.774524	4.2418	2.2173e-05	0.00010389	100039494
Gm8190	2.94301	3.28508	0.990206	3.31757	0.000908037	0.00321849	666614
Eps8	1060.89	3.28435	0.106926	30.7161	3.46835e-207	1.44278e-204	13860
Sgk2	7.0841	3.28331	0.927116	3.54142	0.000397983	0.00150743	27219
Gm21698	22.2016	3.27164	0.460743	7.10078	1.24056e-12	1.18556e-11	100862388
Galnt3	63.7267	3.26719	0.749213	4.36083	1.29571e-05	6.25265e-05	14425
Elovl7	80.2867	3.25789	0.330965	9.8436	7.30509e-23	1.2219e-21	74559
S100a13	256.22	3.25673	0.431003	7.55616	4.15154e-14	4.37612e-13	20196
1700006F04Rik	4.05595	3.25633	0.803603	4.05216	5.07469e-05	0.000225548	75432
Ret	70.9917	3.25457	0.594945	5.47038	4.49079e-08	2.89206e-07	19713
Acot12	10.3965	3.25152	0.711707	4.56863	4.90924e-06	2.51132e-05	74156
Mylk	115.143	3.25002	0.359764	9.03377	1.65862e-19	2.38156e-18	107589
Ecscr	139.607	3.24784	0.262163	12.3886	3.01234e-35	8.21893e-34	68545
Gm11946	23.1954	3.24483	0.432389	7.50441	6.17056e-14	6.42414e-13	102637250
Rflnb	271.447	3.2437	0.305755	10.6088	2.71165e-26	5.22366e-25	76566
Gm12868	7.70081	3.24271	0.82014	3.95385	7.69031e-05	0.000331833	NA
Col8a1	18.9424	3.24267	0.713756	4.54311	5.54313e-06	2.8195e-05	12837
Gm13688	7.43862	3.23761	0.822363	3.93696	8.25214e-05	0.000353894	624223
Rnf125	17.4848	3.23575	0.880932	3.6731	0.000239629	0.00094635	67664
Gm37390	11.6236	3.23174	0.670747	4.81812	1.44914e-06	7.90922e-06	NA
B3gnt7	45.4115	3.22727	0.391318	8.24719	1.62166e-16	2.015e-15	227327
Gm37669	19.3442	3.22621	0.703189	4.58797	4.47575e-06	2.29981e-05	NA
Cavin2	142.487	3.22511	0.327605	9.8445	7.24015e-23	1.21174e-21	20324
Gm23530	8.31193	3.22245	0.854912	3.76934	0.00016368	0.000666063	NA
Cdo1	920.937	3.21805	0.0927906	34.6808	1.53657e-263	1.1026e-260	12583
Gm49614	69.2767	3.21784	0.267601	12.0247	2.63415e-33	6.73268e-32	NA
Lipc	18.8158	3.2147	0.694194	4.63084	3.64189e-06	1.89166e-05	15450
Sstr1	116.264	3.20665	0.365887	8.76405	1.88359e-18	2.56084e-17	20605
9130213A22Rik	5.85137	3.20577	0.834927	3.83958	0.000123243	0.000512823	100038433
Rag1	12.514	3.1999	0.720522	4.44109	8.95048e-06	4.43399e-05	19373
Ano5	20.6539	3.19851	0.721671	4.43209	9.33246e-06	4.60494e-05	233246
Slc2a1	729.267	3.19484	0.285601	11.1864	4.75545e-29	1.03016e-27	20525
Asic4	127.145	3.19402	0.241905	13.2036	8.365e-40	2.60979e-38	241118
1700071G01Rik	5.38546	3.19047	0.93962	3.39549	0.000685048	0.00248552	73485
Scel	52.922	3.18802	0.670379	4.75555	1.9791e-06	1.06219e-05	64929
Phldb3	5.73009	3.18665	0.869854	3.66344	0.000248854	0.000978874	232970
Dusp15	239.319	3.18266	0.13939	22.8327	2.16895e-115	2.84272e-113	252864
Ano2	16.1852	3.17848	0.591432	5.37421	7.69195e-08	4.84703e-07	243634
Cd4	15.9717	3.1775	0.46248	6.87058	6.39435e-12	5.75351e-11	12504
Gm43429	16.9311	3.17673	0.567095	5.60177	2.12172e-08	1.4199e-07	NA
Hmcn1	582.208	3.17562	0.261057	12.1644	4.80707e-34	1.25777e-32	545370
Car8	990.099	3.17486	0.0925564	34.3019	7.34244e-258	4.90117e-255	12319
Afap1l2	1529.45	3.17358	0.112233	28.2767	6.68564e-176	1.91898e-173	226250
C430049B03Rik	240.306	3.16592	0.135879	23.2996	4.47894e-120	6.30191e-118	72575
Prkg2	368.194	3.16504	0.159641	19.826	1.77509e-87	1.62263e-85	19092
Bace2	15.0957	3.16265	0.657818	4.80779	1.52607e-06	8.30543e-06	56175
Bst2	7.1384	3.16153	0.821654	3.84777	0.000119199	0.00049753	69550
Cav2	158.346	3.16031	0.409512	7.71726	1.18859e-14	1.29966e-13	12390
Egr4	17.6187	3.15736	0.656091	4.81238	1.49143e-06	8.12769e-06	13656
Gm16170	10.6276	3.1571	0.852363	3.70394	0.000212275	0.000847041	100861855
Gm21671	25.7265	3.15266	0.632166	4.98708	6.12975e-07	3.49438e-06	100862359
Psors1c2	6.97875	3.15111	0.787465	4.00159	6.29188e-05	0.000275761	57390
Gm26913	5.32317	3.15006	0.869327	3.62356	0.00029058	0.00112816	NA
Sh3tc1	66.803	3.14957	0.644377	4.88778	1.01977e-06	5.66597e-06	231147
Rtp4	22.0917	3.14725	0.522967	6.01806	1.76517e-09	1.30447e-08	67775
Gm17076	14.0165	3.13976	0.721617	4.35101	1.35512e-05	6.52291e-05	100418372
Gm4876	137.939	3.13969	0.221714	14.161	1.59661e-45	5.83049e-44	232599
Rasgrp4	23.3254	3.1385	0.57769	5.43285	5.54595e-08	3.54533e-07	233046
Thsd1	144.84	3.13647	0.282182	11.115	1.06001e-28	2.27225e-27	56229
Tgfbr3	56.2857	3.13101	0.686529	4.56064	5.09969e-06	2.60456e-05	21814
Hspa12b	203.565	3.12697	0.349662	8.94283	3.79339e-19	5.34257e-18	72630
Npr3	34.0884	3.12003	0.879584	3.54717	0.000389398	0.00147862	18162
Gm29455	6.70267	3.11746	0.674591	4.62126	3.81422e-06	1.97581e-05	329239
Creg2	238.149	3.11599	0.211053	14.764	2.49968e-49	1.01339e-47	263764
Lef1	186.263	3.11552	0.429861	7.24773	4.23827e-13	4.19486e-12	16842
Cd300lg	2.40381	3.11361	0.94065	3.31007	0.000932739	0.00329791	52685
Ppp3r2	66.304	3.10725	0.423422	7.33841	2.16146e-13	2.18221e-12	19059
Gm37842	7.6149	3.10598	0.889093	3.49343	0.000476859	0.00177988	NA
Iyd	12.821	3.10382	0.92359	3.3606	0.000777742	0.002788	70337
Stra6	280.996	3.10065	0.25381	12.2164	2.54156e-34	6.74219e-33	20897
Mmp28	74.7774	3.10004	0.606437	5.11189	3.18956e-07	1.87525e-06	118453
Synj2	112.229	3.09982	0.200448	15.4644	6.02983e-54	2.77362e-52	20975
Prtg	112.311	3.09754	0.319482	9.69552	3.15015e-22	5.13452e-21	235472
Kcna1	85.1012	3.09686	0.231483	13.3783	8.09752e-41	2.60564e-39	16485
Gm25188	18.3782	3.09486	0.607713	5.09263	3.53127e-07	2.06769e-06	NA
Krt28	8.45319	3.08332	0.906675	3.40069	0.000672153	0.00244429	70843
Ust	414.906	3.07855	0.195671	15.7333	8.94481e-56	4.32956e-54	338362
Vsig10	57.9115	3.0783	0.397405	7.746	9.48343e-15	1.04573e-13	231668
Ccrl2	5.19436	3.07702	0.980985	3.13666	0.00170883	0.00571128	54199
Gm15583	20.0487	3.07638	0.515781	5.96451	2.45368e-09	1.78751e-08	100043240
Arhgef3	724.114	3.07627	0.0822615	37.3962	4.51004e-306	5.62834e-303	71704
Foxf1	10.4286	3.07459	0.663549	4.63356	3.59432e-06	1.8683e-05	15227
Mx2	36.0894	3.07313	0.579839	5.29996	1.15826e-07	7.1573e-07	17858
Gm44607	9.81005	3.06939	0.708672	4.33118	1.4831e-05	7.10557e-05	NA
4932441J04Rik	30.3031	3.06916	0.490066	6.26274	3.78269e-10	2.95924e-09	319216
Pmel	29.6104	3.06414	0.553386	5.53708	3.07551e-08	2.02655e-07	20431
Adora2b	20.8794	3.06132	0.401132	7.63171	2.31662e-14	2.47742e-13	11541
Arhgap27os3	10.5476	3.05918	0.777173	3.93629	8.27507e-05	0.000354718	653030
Lrig3	166.234	3.05848	0.518791	5.8954	3.73775e-09	2.68547e-08	320398
Slc35f2	110.531	3.05832	0.345452	8.85312	8.51061e-19	1.17669e-17	72022
Olig2	4770.01	3.05474	0.0688191	44.388	0	0	50913
Adamts9	393.191	3.05383	0.120319	25.3812	4.06867e-142	7.58332e-140	101401
Pltp	180.56	3.05063	0.290123	10.5149	7.37243e-26	1.39126e-24	18830
Gm5067	66.7118	3.04989	0.381275	7.99921	1.25225e-15	1.47188e-14	272714
Gm15418	14.2048	3.04771	0.50668	6.01506	1.79821e-09	1.32821e-08	102635457
Arap3	440.73	3.04673	0.314668	9.68234	3.58416e-22	5.83198e-21	106952
Ell2	118.694	3.04532	0.231801	13.1377	2.00299e-39	6.15543e-38	192657
1700019D03Rik	59.2717	3.04322	0.321566	9.46377	2.97043e-21	4.60369e-20	67080
Gm25154	9.52624	3.03818	0.908771	3.34318	0.000828256	0.00295395	NA
Tcf7	224.074	3.03196	0.226071	13.4116	5.17343e-41	1.6741e-39	21414
Treh	25.7169	3.0316	0.437922	6.9227	4.43124e-12	4.05709e-11	58866
Foxc1	135.996	3.02837	0.33322	9.08821	1.00687e-19	1.46255e-18	17300
Allc	8.33553	3.02257	0.7461	4.05116	5.09633e-05	0.000226405	94041
Gm49682	13.7273	3.02152	0.668794	4.51786	6.24671e-06	3.15446e-05	NA
Ppp1r14c	295.53	3.01744	0.120154	25.1131	3.5772e-139	6.53989e-137	76142
Gm37580	6.83095	3.01641	0.991239	3.04307	0.00234178	0.00760105	NA
Apcdd1	2211.85	3.0123	0.27358	11.0107	3.39504e-28	7.11818e-27	494504
1110035H17Rik	6.05839	3.01067	0.777877	3.87036	0.000108673	0.000455896	68686
Sept4	262.688	3.00708	0.250733	11.9932	3.85855e-33	9.80106e-32	18952
Stard13	408.176	3.0065	0.1443	20.835	2.08606e-96	2.18527e-94	243362
E230020A03Rik	26.0878	3.00632	0.375336	8.00967	1.15012e-15	1.35517e-14	319497
Anpep	36.0094	3.00072	0.837853	3.58144	0.0003417	0.00130998	16790
Qpct	319.427	2.99999	0.153693	19.5194	7.50776e-85	6.55001e-83	70536
9330179D12Rik	5.41265	2.99529	1.01472	2.95183	0.00315899	0.00994501	77558
Wipf1	663.192	2.99243	0.104813	28.5501	2.80205e-179	8.37783e-177	215280
Gm45153	228.708	2.98841	0.189945	15.7331	8.97457e-56	4.33665e-54	NA
Mrvi1	17.7024	2.98696	0.650622	4.59093	4.41281e-06	2.2691e-05	17540
Cpeb1	33.5182	2.98668	0.328016	9.10528	8.60417e-20	1.25554e-18	12877
Gimap1	21.2016	2.98253	0.651091	4.58081	4.63172e-06	2.37358e-05	16205
Afap1l1	242.842	2.98247	0.224034	13.3126	1.95488e-40	6.2001e-39	106877
Epas1	2063.38	2.98163	0.204723	14.5642	4.74212e-48	1.84936e-46	13819
Igf2	33.976	2.98088	0.54051	5.51494	3.48903e-08	2.28174e-07	16002
4930515G01Rik	8.20226	2.98049	0.948735	3.14154	0.00168061	0.00562548	67642
Gm50008	10.6656	2.97822	0.877458	3.39414	0.000688442	0.00249752	NA
Gm12970	12.9164	2.97742	0.593974	5.01271	5.36675e-07	3.08392e-06	105247170
Tmem163	223.491	2.97597	0.192947	15.4238	1.1326e-53	5.16015e-52	72160
Raet1d	15.2008	2.97141	0.913746	3.2519	0.00114638	0.0039833	56554
Xylt1	5026.83	2.97087	0.0836025	35.5356	1.38557e-276	1.24281e-273	233781
Ddx43	30.4199	2.97004	0.575868	5.1575	2.50272e-07	1.4879e-06	100048658
Gm38187	51.5698	2.96907	0.429189	6.91787	4.58493e-12	4.19246e-11	NA
Cntn1	6229.45	2.96596	0.092728	31.9856	1.72732e-224	8.40328e-222	12805
Dlc1	869.957	2.96307	0.22597	13.1127	2.78588e-39	8.53397e-38	50768
Tgm2	43.2265	2.96302	0.395722	7.48762	7.01321e-14	7.27767e-13	21817
n-R5s151	16.7524	2.95594	0.444444	6.65086	2.91394e-11	2.48629e-10	NA
Card10	102.346	2.95279	0.360773	8.18462	2.73168e-16	3.35075e-15	105844
Tril	1426.27	2.9516	0.188626	15.6478	3.43675e-55	1.63862e-53	66873
Tsga13	10.9625	2.94754	0.728451	4.04631	5.20307e-05	0.000230789	116732
Gm18367	6.0803	2.94451	0.989721	2.97509	0.00292905	0.00931138	100417023
Slc16a12	22.0638	2.94285	0.487857	6.0322	1.61741e-09	1.19836e-08	240638
Trpm6	37.4365	2.93967	0.358681	8.19578	2.48966e-16	3.06303e-15	225997
Gpc3	49.5147	2.93524	0.454556	6.45738	1.0653e-10	8.70407e-10	14734
Abcc9	261.427	2.93521	0.573352	5.11937	3.06552e-07	1.80528e-06	20928
Dennd3	164.503	2.93298	0.321887	9.11184	8.09987e-20	1.18376e-18	105841
Gm47210	5.98197	2.92965	0.766427	3.82248	0.000132114	0.000546645	NA
Ace	134.306	2.92872	0.258643	11.3234	1.00504e-29	2.23626e-28	11421
Klf2	176.487	2.92832	0.264769	11.0599	1.96272e-28	4.15763e-27	16598
Rhbdl2	38.4581	2.92773	0.379334	7.71806	1.18113e-14	1.29199e-13	230726
Gm16237	26.8384	2.92744	0.499051	5.86603	4.46365e-09	3.17729e-08	NA
Slc7a5	2616.78	2.92434	0.149576	19.5509	4.05449e-85	3.56982e-83	20539
Gm10530	133.908	2.92373	0.402599	7.26215	3.8099e-13	3.78655e-12	100038672
Tmem252	37.6752	2.92208	0.51334	5.69229	1.25349e-08	8.58274e-08	226040
9530078K11Rik	4.76635	2.9216	0.967033	3.0212	0.00251772	0.00811798	78564
Prkg1	346.175	2.92078	0.166343	17.5588	5.09154e-69	3.32899e-67	19091
Ddi1	9.38213	2.91668	0.937951	3.10962	0.00187326	0.00620283	71829
Itga9	320.167	2.91405	0.235296	12.3846	3.16647e-35	8.63125e-34	104099
Gm27200	12.3424	2.91342	0.780597	3.73229	0.000189746	0.000763425	NA
Gm24582	14.1711	2.9131	0.617927	4.71431	2.42536e-06	1.28989e-05	NA
Dock5	96.1467	2.90628	0.25836	11.2489	2.34401e-29	5.12024e-28	68813
Lsr	77.5481	2.89843	0.282111	10.2741	9.22189e-25	1.66475e-23	54135
Bmp7	626.65	2.89584	0.114568	25.2762	5.83853e-141	1.07425e-138	12162
Fxyd5	76.6196	2.89497	0.307667	9.4094	4.98966e-21	7.67514e-20	18301
Col4a1	3282.85	2.8935	0.201442	14.3639	8.71264e-47	3.2992e-45	12826
Vtn	134.149	2.89284	0.55689	5.19464	2.05113e-07	1.23141e-06	22370
Rbpms	99.9369	2.89262	0.26413	10.9515	6.53514e-28	1.3524e-26	19663
Gng8	4.97946	2.89259	0.921373	3.13944	0.00169271	0.0056627	14709
Omg	545.869	2.89255	0.14645	19.7511	7.85416e-87	7.08925e-85	18377
Gimap8	35.7437	2.89133	0.637607	4.53466	5.76975e-06	2.92958e-05	243374
Slitrk2	1831.56	2.88289	0.0872716	33.0335	2.68436e-239	1.48172e-236	245450
Gm8188	4.39134	2.88159	0.843666	3.41555	0.000636526	0.00232534	666611
Col4a2	2840.3	2.88147	0.235766	12.2218	2.37899e-34	6.31675e-33	12827
Gm37478	46.3348	2.88053	0.689589	4.17717	2.95153e-05	0.000135809	NA
Gm49124	9.27676	2.88048	0.643917	4.47337	7.69964e-06	3.84019e-05	NA
Ccdc141	960.364	2.87882	0.238377	12.0767	1.40214e-33	3.62246e-32	545428
Gm6089	14.4324	2.87615	0.694463	4.14154	3.44978e-05	0.000157498	619645
Slc5a7	122.585	2.87389	0.353269	8.13513	4.11489e-16	4.99618e-15	63993
Snx20	10.6713	2.87314	0.605249	4.74704	2.06418e-06	1.10579e-05	71607
Gm15824	4.73835	2.87289	0.786256	3.65388	0.000258305	0.00101369	100188958
Tfpi	83.2097	2.87164	0.564071	5.09093	3.5631e-07	2.08335e-06	21788
Gria3	1256.44	2.87069	0.111477	25.7515	3.10435e-146	6.18778e-144	53623
Htr2a	24.0698	2.87066	0.568953	5.04551	4.52314e-07	2.61802e-06	15558
Gm37613	130.751	2.86953	0.219441	13.0765	4.48365e-39	1.36329e-37	NA
Gm15367	4.79193	2.8688	0.918981	3.12172	0.00179801	0.00597732	100417917
Zdhhc2	795.211	2.8641	0.097589	29.3486	2.49186e-189	8.31673e-187	70546
Ncald	2401.28	2.86165	0.0776851	36.8365	4.80415e-297	5.74557e-294	52589
Ccn2	45.0286	2.85945	0.505578	5.6558	1.55118e-08	1.05133e-07	14219
Emid1	582.467	2.85534	0.144856	19.7115	1.71749e-86	1.54536e-84	140703
Gm19514	134.568	2.85464	0.238287	11.9799	4.53049e-33	1.14672e-31	100503026
Gm47932	17.6807	2.85353	0.506056	5.63876	1.71282e-08	1.15678e-07	NA
Etv4	588.239	2.8532	0.151877	18.7862	9.79017e-79	7.61537e-77	18612
AC165327.2	4.00011	2.84755	0.883406	3.22337	0.00126691	0.00435654	NA
Cyp2j6	516.936	2.84357	0.121378	23.4273	2.25129e-121	3.26357e-119	13110
Kctd12b	157.744	2.84017	0.465051	6.10724	1.01372e-09	7.64093e-09	207474
Gm47626	2.99647	2.84001	0.961698	2.95312	0.00314582	0.00991267	NA
Zfp457	11.3656	2.83703	0.822645	3.44867	0.000563348	0.00207491	431706
Gm25973	5.51669	2.83627	0.623549	4.54859	5.40056e-06	2.74991e-05	NA
Card6	32.5383	2.83597	0.587955	4.82345	1.41093e-06	7.70946e-06	239319
Pdlim3	19.2029	2.83404	0.546479	5.18599	2.14866e-07	1.28727e-06	53318
Gm15197	5.1372	2.83325	0.882512	3.21044	0.00132533	0.00454221	666540
Lrrc32	39.9168	2.83072	0.398654	7.10071	1.24119e-12	1.18556e-11	434215
Glis1	40.0224	2.82563	0.267363	10.5685	4.17199e-26	7.96201e-25	230587
Chst5	22.0681	2.82544	0.554148	5.0987	3.41986e-07	2.00696e-06	56773
Gm17518	5.50711	2.82443	0.866667	3.25895	0.00111825	0.00389527	100503390
Nostrin	110.931	2.82191	0.374949	7.52611	5.22742e-14	5.47801e-13	329416
Spsb1	182.09	2.82106	0.196957	14.3232	1.56735e-46	5.86539e-45	74646
Cnp	1213.63	2.81808	0.17059	16.5196	2.65002e-61	1.45716e-59	12799
Svep1	65.0845	2.81679	0.385746	7.30218	2.83145e-13	2.84065e-12	64817
S1pr2	118.107	2.81333	0.49041	5.7367	9.65409e-09	6.69327e-08	14739
Rasgrp3	299.593	2.81239	0.418644	6.71786	1.84409e-11	1.60296e-10	240168
Gm37593	37.8981	2.81235	0.276232	10.1811	2.4072e-24	4.28091e-23	NA
Snx22	168.026	2.8096	0.211845	13.2625	3.81844e-40	1.2044e-38	382083
Gm26682	10.4598	2.80599	0.673821	4.1643	3.12308e-05	0.000143221	102637682
Epn2	4199.1	2.80534	0.0518134	54.1431	0	0	13855
Gprc5c	15.9568	2.80433	0.812191	3.45279	0.000554811	0.00204632	70355
Gm48606	8.90157	2.80384	0.695312	4.03249	5.51882e-05	0.000243815	NA
Abcg2	315.157	2.79845	0.152032	18.407	1.15368e-75	8.46904e-74	26357
Gm37645	30.1055	2.79814	0.562052	4.97844	6.41002e-07	3.64402e-06	NA
Gm29626	6.1269	2.79707	0.867388	3.22471	0.00126102	0.00433942	NA
Gm43917	77.6705	2.79613	0.266243	10.5022	8.4388e-26	1.58832e-24	NA
Ptprtos	10.6099	2.79422	0.577326	4.83993	1.29884e-06	7.12007e-06	77645
Gm1979	17.7718	2.79014	0.646583	4.31522	1.59447e-05	7.60361e-05	100038949
Sdr42e1	50.4234	2.78903	0.364209	7.65777	1.89193e-14	2.03462e-13	74032
Dbx2	140.396	2.78552	0.276669	10.068	7.64825e-24	1.32565e-22	223843
Zdhhc22	126.867	2.78458	0.204199	13.6366	2.42605e-42	8.10652e-41	238331
Gm18875	35.4725	2.78398	0.632547	4.40123	1.07641e-05	5.25804e-05	100417878
6030407O03Rik	27.5244	2.77877	0.47887	5.80277	6.52292e-09	4.59341e-08	109198
Gm10471	18.7931	2.77586	0.575055	4.82713	1.38516e-06	7.57589e-06	100039045
Gm15429	3.77377	2.77232	0.932097	2.97428	0.00293675	0.00933202	100039623
Agpat2	26.0013	2.77128	0.506104	5.47572	4.35736e-08	2.81371e-07	67512
Rgs5	1541.43	2.7692	0.298105	9.28934	1.55246e-20	2.34157e-19	19737
AC133523.4	5.64472	2.76905	0.87851	3.15198	0.00162165	0.00544538	NA
Gm38340	50.0477	2.768	0.341787	8.09861	5.55887e-16	6.6928e-15	NA
Gpx3	199.113	2.76591	0.258876	10.6843	1.20546e-26	2.35537e-25	14778
Slco4a1	16.8655	2.7619	0.876279	3.15185	0.0016224	0.00544714	108115
Icam1	45.6942	2.7609	0.38627	7.14757	8.83249e-13	8.55616e-12	15894
A330009N23Rik	110.083	2.75764	0.199053	13.8538	1.20619e-43	4.18638e-42	380977
Slc22a3	185.247	2.75748	0.151472	18.2046	4.74768e-74	3.39832e-72	20519
Ptges3l	12.5377	2.75438	0.421136	6.54035	6.13755e-11	5.10035e-10	73635
Tmem159	14.3493	2.75116	0.642945	4.279	1.87737e-05	8.86578e-05	233806
Bfsp2	43.3942	2.75068	0.349902	7.86128	3.8022e-15	4.30171e-14	107993
Enpp3	110.342	2.74999	0.317744	8.65474	4.94035e-18	6.59549e-17	209558
Fhl3	48.8695	2.74956	0.386896	7.10671	1.18838e-12	1.13738e-11	14201
Nr4a1	858.303	2.7463	0.120127	22.8616	1.12002e-115	1.47467e-113	15370
Trpv4	34.2508	2.7419	0.591394	4.63633	3.5465e-06	1.84512e-05	63873
Snx31	21.7484	2.7405	0.72307	3.79009	0.000150591	0.00061696	66696
Gm44316	7.24393	2.73869	0.865669	3.16368	0.0015579	0.00525459	NA
Gbp3	128.285	2.73796	0.460653	5.94365	2.78743e-09	2.02244e-08	55932
Gm43999	48.2018	2.73218	0.269991	10.1195	4.52615e-24	7.96042e-23	NA
Prdm1	92.5331	2.7313	0.354788	7.6984	1.37779e-14	1.49628e-13	12142
Pde8a	196.106	2.72893	0.260451	10.4777	1.09381e-25	2.05066e-24	18584
Grhl2	94.0338	2.7258	0.315622	8.63629	5.80705e-18	7.73456e-17	252973
Synm	617.574	2.72559	0.226096	12.055	1.82511e-33	4.68571e-32	233335
Gm12867	7.14541	2.72512	0.839268	3.24702	0.00116618	0.00404263	105244674
Bcan	8202.04	2.72327	0.141345	19.2669	1.0191e-82	8.62866e-81	12032
Fli1	206.69	2.72111	0.35848	7.5907	3.18179e-14	3.37498e-13	14247
Gm47484	17.3515	2.7157	0.542232	5.00837	5.48919e-07	3.14861e-06	NA
9630013A20Rik	227.234	2.70883	0.129302	20.9495	1.89414e-97	2.00618e-95	319903
Gm49397	29.7106	2.70753	0.444532	6.09074	1.12392e-09	8.44496e-09	NA
Lgals9	85.6685	2.70544	0.282806	9.5664	1.10695e-21	1.75735e-20	16859
Tmem88b	53.4554	2.70324	0.335015	8.06902	7.08674e-16	8.47545e-15	320587
Ctsh	118.74	2.70051	0.29306	9.21485	3.11712e-20	4.63339e-19	13036
Adam12	1096.28	2.69805	0.0957308	28.1837	9.26682e-175	2.55755e-172	11489
Pglyrp1	98.6078	2.6971	0.331707	8.13098	4.2583e-16	5.16594e-15	21946
4930447A16Rik	143.807	2.69469	0.259495	10.3844	2.92124e-25	5.35773e-24	74892
Sgk1	610.711	2.69366	0.121751	22.1242	1.84787e-108	2.26664e-106	20393
Gm37720	22.9135	2.68615	0.637041	4.2166	2.48012e-05	0.000115582	NA
Itpkb	775.201	2.6815	0.21002	12.7679	2.47884e-37	7.20872e-36	320404
1700123L14Rik	7.94797	2.67426	0.802208	3.33363	0.000857218	0.00304891	78482
Gm13063	4.58266	2.67359	0.738307	3.62124	0.000293192	0.00113692	666480
Gm29325	11.4471	2.6711	0.898981	2.97126	0.00296581	0.00941261	NA
Frmpd1	505.239	2.67041	0.162657	16.4175	1.43379e-60	7.67801e-59	666060
Arhgap6	30.1255	2.66813	0.443607	6.01462	1.80314e-09	1.3315e-08	11856
Gm24250	8.42952	2.66659	0.850202	3.13642	0.00171027	0.00571477	NA
Fzd6	88.8076	2.66557	0.496186	5.37211	7.78189e-08	4.8994e-07	14368
Gm5608	3.72505	2.6626	0.87462	3.04429	0.00233229	0.00757196	434282
Jcad	1136.35	2.66195	0.216583	12.2907	1.01666e-34	2.72468e-33	240185
Gm44065	20.6624	2.65949	0.518738	5.12685	2.94632e-07	1.73973e-06	NA
Arhgap24	222.218	2.65786	0.276722	9.60482	7.62911e-22	1.22403e-20	231532
Gm15425	18.7136	2.65758	0.658651	4.03489	5.46286e-05	0.000241678	102637605
Dcaf12l2	32.3592	2.65494	0.394448	6.73078	1.68759e-11	1.47097e-10	245403
B9d1	666.435	2.65463	0.0663467	40.0115	0	0	27078
Col28a1	48.8068	2.65406	0.492103	5.39329	6.91786e-08	4.37943e-07	213945
Plekhb1	594.516	2.64851	0.120926	21.9019	2.49279e-106	2.9689e-104	27276
Fzd4	191.586	2.64594	0.225384	11.7397	7.9791e-32	1.94088e-30	14366
Opcml	1937.45	2.64312	0.108615	24.3347	8.41527e-131	1.42925e-128	330908
St3gal6	174.892	2.64235	0.179061	14.7567	2.78734e-49	1.12683e-47	54613
Birc3	42.9597	2.63609	0.557348	4.72971	2.24845e-06	1.20002e-05	11796
Tmc8	13.1524	2.6334	0.559091	4.71015	2.47539e-06	1.31455e-05	217356
Pcdh11x	2030.07	2.62982	0.0757673	34.7091	5.73508e-264	4.22087e-261	245578
Nptx1	185.073	2.62976	0.221816	11.8556	2.01286e-32	4.98491e-31	18164
Rgcc	525.431	2.62762	0.137584	19.0982	2.61323e-81	2.12486e-79	66214
Gm37731	293.599	2.62447	0.296184	8.86093	7.93479e-19	1.09919e-17	NA
Gm20471	17.4728	2.62366	0.68337	3.8393	0.000123387	0.000513348	105243993
Gm48250	34.0818	2.62124	0.288365	9.09001	9.90271e-20	1.43991e-18	NA
Dusp2	36.157	2.62031	0.569476	4.60127	4.19923e-06	2.16742e-05	13537
Ier3	21.2284	2.61715	0.422098	6.20034	5.63428e-10	4.33568e-09	15937
Dusp27	36.201	2.60933	0.446637	5.84218	5.15236e-09	3.65336e-08	240892
Abcc4	292.814	2.60925	0.192872	13.5284	1.06304e-41	3.50316e-40	239273
Gm49311	74.9167	2.60823	0.261636	9.96892	2.08475e-23	3.54074e-22	NA
Palmd	399.929	2.60803	0.17943	14.5351	7.26519e-48	2.82565e-46	114301
Eogt	576.17	2.60761	0.228405	11.4166	3.45353e-30	7.85473e-29	101351
Adgra2	269.436	2.60614	0.214666	12.1404	6.44887e-34	1.68122e-32	78560
Notch4	251.933	2.60605	0.173549	15.0162	5.75189e-51	2.42432e-49	18132
Bgn	676.827	2.60491	0.240333	10.8387	2.25603e-27	4.54101e-26	12111
Slc7a3	57.2624	2.60174	0.450128	5.78	7.47018e-09	5.23223e-08	11989
Dscam	2392.5	2.60118	0.107894	24.1086	2.0309e-128	3.33102e-126	13508
S100a1	407.119	2.60115	0.172008	15.1222	1.15584e-51	4.92957e-50	20193
Caskin2	1479.61	2.59694	0.114643	22.6523	1.32493e-113	1.72079e-111	140721
P2ry2	33.3753	2.59398	0.459653	5.64334	1.66779e-08	1.12769e-07	18442
Gm47089	21.2842	2.59388	0.44585	5.81784	5.96119e-09	4.20817e-08	NA
Gm44746	92.8632	2.59384	0.323985	8.00607	1.18433e-15	1.3949e-14	NA
Zfp365	522.464	2.59181	0.108725	23.8381	1.34558e-125	2.08769e-123	216049
Dab2	646.909	2.59148	0.154906	16.7294	8.00957e-63	4.52557e-61	13132
Megf11	1136.26	2.58044	0.0987886	26.1208	2.11462e-150	4.36661e-148	214058
Adgre4	12.3727	2.57994	0.753465	3.42411	0.00061682	0.00225939	52614
Gbp9	46.416	2.57909	0.488534	5.27925	1.29713e-07	7.96396e-07	236573
Gm3617	10.5264	2.57579	0.790122	3.25999	0.00111414	0.00388229	100041999
Rap1gapos	11.0378	2.57482	0.561913	4.58224	4.60018e-06	2.3591e-05	69808
Gm12272	82.6834	2.57101	0.222458	11.5573	6.78259e-31	1.57764e-29	NA
Gm9885	76.1012	2.56959	0.536379	4.79063	1.66261e-06	9.00582e-06	791275
Naalad2	50.6502	2.56897	0.51136	5.0238	5.06603e-07	2.91871e-06	72560
Sh3bgr	17.0559	2.56377	0.64219	3.99223	6.54547e-05	0.000286089	50795
Plppr5	755.778	2.56261	0.0846107	30.2871	1.69669e-201	6.49334e-199	75769
Tnfrsf25	11.5883	2.56087	0.780181	3.28241	0.00102925	0.0036089	85030
Steap3	71.0065	2.55879	0.296198	8.63879	5.68129e-18	7.5776e-17	68428
Trpv3	11.1756	2.55743	0.83056	3.07917	0.0020758	0.00681244	246788
Sox5it	18.1833	2.55578	0.637467	4.00927	6.09061e-05	0.000267593	100038723
Gm14931	9.26866	2.55361	0.759426	3.36255	0.000772248	0.00277097	NA
Dock10	1928.48	2.5491	0.0991643	25.7058	1.00581e-145	1.96392e-143	210293
Trim16	124.896	2.54861	0.317387	8.02998	9.74872e-16	1.15579e-14	94092
Slc9a3r2	326.138	2.54722	0.19275	13.2152	7.17202e-40	2.24247e-38	65962
Nid2	431.531	2.54439	0.188509	13.4974	1.61899e-41	5.31085e-40	18074
Tmcc3	789.62	2.5404	0.127392	19.9416	1.77463e-88	1.66462e-86	319880
Col11a2	495.836	2.53773	0.182991	13.8681	9.88969e-44	3.44077e-42	12815
Col4a3	44.0902	2.53719	0.518129	4.89683	9.73973e-07	5.42308e-06	12828
Disc1	262.893	2.53573	0.178561	14.2009	9.04234e-46	3.32747e-44	244667
Emb	54.0151	2.53543	0.257097	9.86179	6.09519e-23	1.0225e-21	13723
Gpnmb	14.8112	2.53542	0.816327	3.10589	0.0018971	0.00627621	93695
Ccdc125	45.0762	2.53507	0.397507	6.37742	1.80091e-10	1.44309e-09	76041
H60b	11.878	2.52962	0.611931	4.13384	3.56755e-05	0.000162307	667281
P2rx7	627.38	2.52811	0.0936839	26.9855	2.18411e-160	5.13856e-158	18439
Gm20658	15.1409	2.52485	0.473318	5.33437	9.58776e-08	5.97476e-07	102633213
Gm44001	67.895	2.5247	0.210433	11.9976	3.65672e-33	9.29663e-32	NA
Gm4798	3.33327	2.52419	0.845797	2.98439	0.00284146	0.00906104	216082
Dock6	886.612	2.52256	0.132415	19.0504	6.52603e-81	5.24697e-79	319899
Tmcc3os	42.8074	2.52213	0.36307	6.94669	3.73948e-12	3.45126e-11	NA
Prss50	9.12347	2.52029	0.596982	4.22172	2.4245e-05	0.000113174	235631
Tmem100	301.793	2.51642	0.172397	14.5967	2.9498e-48	1.15667e-46	67888
Gm807	9.97859	2.51372	0.806003	3.11875	0.0018162	0.00603431	328320
Bche	132.668	2.51212	0.275788	9.10888	8.32378e-20	1.21586e-18	12038
Sertad1	23.4521	2.51185	0.413792	6.07031	1.27662e-09	9.54241e-09	55942
Ldlrap1	70.0136	2.51116	0.392776	6.39336	1.62279e-10	1.30473e-09	100017
Adamtsl2	173.912	2.51073	0.280845	8.93992	3.89456e-19	5.47431e-18	77794
Sod3	42.694	2.51046	0.724157	3.46674	0.000526813	0.00195161	20657
Gm44643	22.1437	2.50914	0.44402	5.65096	1.59551e-08	1.0806e-07	NA
9130015G15Rik	91.209	2.50377	0.234033	10.6983	1.03624e-26	2.03304e-25	108167511
Cped1	30.2674	2.49893	0.511442	4.88604	1.02885e-06	5.71309e-06	214642
Ephx1	82.6685	2.49726	0.303285	8.23406	1.80977e-16	2.24582e-15	13849
Def6	77.573	2.49572	0.550529	4.53332	5.80629e-06	2.94761e-05	23853
Tspan2	305.549	2.49538	0.140656	17.741	2.02178e-70	1.35904e-68	70747
Dhh	16.8597	2.49369	0.82619	3.0183	0.00254194	0.0081887	13363
Ifi44	13.4459	2.49167	0.7398	3.36803	0.000757071	0.00272308	99899
Gm27151	6.36606	2.49111	0.68264	3.64923	0.000263024	0.00102981	102641617
Cryab	17.7243	2.48864	0.584665	4.25652	2.07633e-05	9.75718e-05	12955
Rasl12	40.8736	2.4851	0.299364	8.30125	1.03022e-16	1.29411e-15	70784
Hlx	35.6462	2.48328	0.782436	3.17378	0.00150466	0.00509176	15284
Gstm2	12.0659	2.48258	0.819507	3.02936	0.00245076	0.00792163	14863
Gm37612	10.3552	2.47915	0.634211	3.90903	9.2666e-05	0.000393402	NA
Zfpm1	194.046	2.47821	0.175785	14.098	3.90835e-45	1.39703e-43	22761
Ptgis	15.6903	2.47779	0.671218	3.69149	0.000222947	0.000884976	19223
Snai2	34.8597	2.47459	0.555176	4.45731	8.2994e-06	4.12713e-05	20583
Abcb4	197.082	2.47113	0.145088	17.0319	4.76223e-65	2.82418e-63	18670
Plppr1	767.46	2.47019	0.095841	25.7738	1.74441e-146	3.50138e-144	272031
Tm4sf1	27.2178	2.46925	0.551764	4.47519	7.6344e-06	3.80897e-05	17112
Plekhf1	24.4361	2.46782	0.500089	4.93477	8.02437e-07	4.51084e-06	72287
Gm43557	26.5935	2.46608	0.458802	5.37504	7.65668e-08	4.82798e-07	NA
Gm44095	11.9619	2.46452	0.692855	3.55706	0.000375032	0.00142851	NA
Serinc5	1125	2.4631	0.131891	18.6752	7.87823e-78	6.01406e-76	218442
Ttyh2	807.4	2.46187	0.220149	11.1828	4.95236e-29	1.07039e-27	117160
Slc1a1	607.554	2.45722	0.149226	16.4664	6.3999e-61	3.45294e-59	20510
Gm12296	103.515	2.45489	0.32993	7.44065	1.0019e-13	1.02778e-12	100093714
Prss48	115.014	2.45238	0.192798	12.7199	4.58355e-37	1.3209e-35	368202
Cdh18	69.3466	2.45217	0.361842	6.77691	1.22777e-11	1.08179e-10	320865
Gm2464	14.2949	2.45143	0.46028	5.32596	1.00423e-07	6.23229e-07	100039861
Fam78a	21.8741	2.45142	0.45837	5.34812	8.88716e-08	5.55869e-07	241303
Gm2a	1237.77	2.45137	0.0918379	26.6924	5.76511e-157	1.30296e-154	14667
Ppp1r16b	1834.04	2.45082	0.0962373	25.4664	4.64675e-143	8.83283e-141	228852
Gm14930	20.5866	2.4446	0.674199	3.62594	0.000287916	0.00111812	100417956
Pdlim5	857.718	2.43743	0.110236	22.1111	2.47187e-108	3.01915e-106	56376
Gm13684	26.9386	2.43676	0.349059	6.98094	2.9321e-12	2.72275e-11	NA
Gm15910	18.1757	2.43652	0.518525	4.69895	2.61502e-06	1.38434e-05	100504616
B130024G19Rik	31.2286	2.4344	0.457562	5.32037	1.03555e-07	6.42112e-07	434198
B230217J21Rik	37.9145	2.43359	0.290835	8.3676	5.88035e-17	7.47824e-16	320307
Ankrd33b	12.5647	2.43212	0.753841	3.2263	0.001254	0.00431838	67434
Cnn2	109.702	2.43142	0.326157	7.45476	9.00328e-14	9.26573e-13	12798
Sh3d19	1773.78	2.43098	0.105159	23.1171	3.11287e-118	4.27505e-116	27059
Csmd3	1609.64	2.42841	0.104005	23.349	1.40997e-120	2.00348e-118	239420
Kcnip3	2532.78	2.42191	0.103659	23.3642	9.88357e-121	1.41138e-118	56461
B630019A10Rik	7.45205	2.41829	0.813513	2.97265	0.00295237	0.00937514	100043541
Gm48591	9.05201	2.41701	0.642299	3.76306	0.000167848	0.000682013	NA
Mill2	34.1312	2.40776	0.52413	4.59383	4.35176e-06	2.24011e-05	243864
Plod1	578.543	2.40743	0.255858	9.40925	4.99706e-21	7.68241e-20	18822
Bsg	5395.87	2.40734	0.149295	16.1247	1.71054e-58	8.72072e-57	12215
Mapkapk3	16.0577	2.40284	0.699836	3.43343	0.000595994	0.00218729	102626
G0s2	115.219	2.40058	0.230275	10.4249	1.9092e-25	3.53319e-24	14373
Gm38259	30.4935	2.40045	0.612066	3.92188	8.786e-05	0.00037455	NA
Trabd2b	26.4863	2.39951	0.662922	3.61959	0.000295069	0.00114374	666048
Tubb6	156.073	2.39851	0.21502	11.1548	6.78223e-29	1.46259e-27	67951
Cabp7	29.8748	2.39823	0.437957	5.47595	4.35159e-08	2.81125e-07	192650
Adcy8	108.817	2.39721	0.218492	10.9716	5.23135e-28	1.08729e-26	11514
Spock2	7315.89	2.39614	0.164881	14.5325	7.53659e-48	2.92724e-46	94214
Epcam	21.9066	2.39424	0.725737	3.29904	0.000970149	0.00341797	17075
Cdkn2b	37.5579	2.39373	0.36713	6.52012	7.0253e-11	5.81283e-10	12579
Aldh3b1	23.0208	2.39155	0.42321	5.65098	1.59536e-08	1.0806e-07	67689
Kcp	148.978	2.39021	0.223639	10.6878	1.16074e-26	2.27108e-25	333088
Pld1	850.38	2.38941	0.146969	16.2578	1.96531e-59	1.02378e-57	18805
Ccnd1	907.032	2.38938	0.144871	16.4931	4.11134e-61	2.24349e-59	12443
Spsb2	16.7383	2.38509	0.498813	4.78153	1.73969e-06	9.39321e-06	14794
Cast	217.688	2.38474	0.199496	11.9538	6.19878e-33	1.558e-31	12380
Tmem82	13.9855	2.38463	0.750278	3.17833	0.00148126	0.00502349	213989
BC064078	16.9818	2.38361	0.678684	3.5121	0.000444578	0.00166798	408064
Il1r1	42.467	2.38165	0.548103	4.34527	1.39107e-05	6.68135e-05	16177
Timp4	602.743	2.38022	0.172453	13.8021	2.47416e-43	8.49473e-42	110595
Grin3a	1404.32	2.37966	0.0988475	24.074	4.67597e-128	7.58273e-126	242443
Cdh20	522.801	2.3771	0.193351	12.2942	9.72908e-35	2.60985e-33	23836
Asap3	181.543	2.37689	0.209504	11.3453	7.82534e-30	1.75614e-28	230837
Col18a1	377.599	2.37653	0.159909	14.8618	5.83463e-50	2.39587e-48	12822
Gm45191	214.347	2.37568	0.15607	15.2219	2.53251e-52	1.10472e-50	NA
Chst11	1363.03	2.37551	0.105686	22.477	6.96255e-112	8.96171e-110	58250
Fbn2	1098.9	2.37543	0.0804787	29.5163	1.78112e-191	6.08612e-189	14119
Col9a3	1066.92	2.3752	0.0988456	24.0294	1.37233e-127	2.21292e-125	12841
Proser2	46.3557	2.37228	0.367677	6.45207	1.10334e-10	8.99688e-10	227545
Gbp2	15.2507	2.36764	0.751735	3.14956	0.00163515	0.00548676	14469
Parvb	494.671	2.36511	0.175131	13.5048	1.46581e-41	4.81386e-40	170736
Sapcd2	576.866	2.36461	0.156288	15.1298	1.02935e-51	4.40321e-50	72080
Gm10118	37.0283	2.36394	0.414983	5.69647	1.22317e-08	8.38713e-08	791346
Ism1	47.0242	2.36251	0.338275	6.98398	2.86924e-12	2.66783e-11	319909
Gm45394	14.2928	2.36187	0.591456	3.99332	6.51555e-05	0.000284868	NA
Slc4a10	431.046	2.36132	0.143056	16.5063	3.30464e-61	1.81017e-59	94229
Gm13898	11.0294	2.36131	0.66977	3.52555	0.000422599	0.0015931	100417251
Ptprk	907.629	2.36131	0.122743	19.2379	1.78328e-82	1.50104e-80	19272
Plekha2	78.5317	2.36076	0.24805	9.51729	1.77748e-21	2.78793e-20	83436
Trnp1	165.7	2.36075	0.470752	5.01485	5.30756e-07	3.05052e-06	69539
4933408N05Rik	12.5568	2.35927	0.424212	5.56154	2.67412e-08	1.771e-07	71122
Gm33869	375.976	2.35787	0.138035	17.0818	2.02901e-65	1.22113e-63	102636931
9530013L04Rik	10.7784	2.3576	0.70745	3.33253	0.00086059	0.00306015	77408
Gm7008	5.74569	2.35722	0.644013	3.6602	0.000252022	0.000990659	629820
1700003G18Rik	22.7681	2.35711	0.43293	5.44455	5.19376e-08	3.32685e-07	69350
N4bp3	145.233	2.35681	0.239895	9.82435	8.84401e-23	1.47501e-21	212706
Dll4	239.965	2.3557	0.375901	6.26682	3.68504e-10	2.88442e-09	54485
Tgfbr2	460.372	2.3545	0.351367	6.70097	2.07046e-11	1.79163e-10	21813
Rprm	189.745	2.35286	0.160017	14.7038	6.09166e-49	2.42173e-47	67874
Slc9a9	451.517	2.34898	0.179168	13.1105	2.86755e-39	8.77477e-38	331004
Sox8	3478.14	2.34847	0.0846496	27.7434	2.09495e-169	5.51663e-167	20681
Kif13a	2380.55	2.34815	0.0659716	35.5934	1.77481e-277	1.6433e-274	16553
Tdrd7	773.124	2.3459	0.0846393	27.7165	4.41618e-169	1.14196e-166	100121
Apobr	8.99497	2.3439	0.742622	3.15625	0.00159811	0.00538133	171504
Gm42603	19.0623	2.34332	0.687179	3.41007	0.000649473	0.00236992	NA
Gm32849	211.884	2.34207	0.332425	7.04542	1.849e-12	1.74636e-11	102635541
Gm6588	76.8144	2.34057	0.332149	7.04673	1.8317e-12	1.73059e-11	625464
Mlph	20.2005	2.34016	0.493515	4.74182	2.11802e-06	1.13378e-05	171531
Manba	97.9752	2.33889	0.24043	9.72795	2.29166e-22	3.76087e-21	110173
Ehd3	665.929	2.33476	0.129893	17.9745	3.08605e-72	2.14477e-70	57440
Gm42517	77.9477	2.32983	0.310649	7.49989	6.38702e-14	6.64227e-13	NA
Galnt10	863.373	2.32958	0.121175	19.2249	2.2893e-82	1.91017e-80	171212
Chadl	306.027	2.32895	0.157767	14.762	2.57708e-49	1.0433e-47	214685
Gm16054	20.0057	2.32511	0.456267	5.09593	3.47028e-07	2.03447e-06	NA
Gm48603	38.0154	2.32345	0.387233	6.00014	1.97149e-09	1.45022e-08	NA
Abtb2	692.888	2.32326	0.14364	16.1743	7.65956e-59	3.92594e-57	99382
Myh3	20.8897	2.31876	0.551109	4.20745	2.58267e-05	0.000119933	17883
Hrh1	65.2296	2.31704	0.448134	5.17041	2.33577e-07	1.39326e-06	15465
Plekha4	35.4498	2.31504	0.476203	4.86146	1.16526e-06	6.42211e-06	69217
Gm44664	50.4576	2.31444	0.413356	5.59915	2.15407e-08	1.43987e-07	NA
Sez6l	1965.59	2.31283	0.104605	22.1101	2.52827e-108	3.07495e-106	56747
Gm47239	41.2205	2.31178	0.328536	7.03659	1.97006e-12	1.85582e-11	NA
Cdc42ep1	366.445	2.30974	0.126199	18.3023	7.92558e-75	5.73018e-73	104445
Vangl1	175.683	2.30736	0.235038	9.81694	9.51932e-23	1.58672e-21	229658
Prune2	468.559	2.30635	0.113855	20.2569	3.08765e-91	3.04552e-89	353211
Sox3	281.225	2.30542	0.127001	18.1528	1.21997e-73	8.6675e-72	20675
Tspan17	15.3465	2.30353	0.517631	4.45013	8.58187e-06	4.26095e-05	74257
Gnat1	14.9052	2.29561	0.44206	5.19297	2.06963e-07	1.24225e-06	14685
Gm37644	41.7567	2.29225	0.376953	6.081	1.19433e-09	8.95295e-09	NA
Gm7347	27.0914	2.29169	0.639579	3.58311	0.000339522	0.0013025	664804
Dnmt3l-ps1	23.9143	2.29063	0.52296	4.38013	1.18608e-05	5.75847e-05	445264
Adra1b	16.3375	2.28803	0.49975	4.57834	4.68681e-06	2.40095e-05	11548
Six4	46.7189	2.28622	0.429141	5.32743	9.96133e-08	6.18875e-07	20474
Osgin1	16.0954	2.28392	0.648844	3.51999	0.00043157	0.00162414	71839
Slc7a1	2118.64	2.28145	0.149903	15.2195	2.62606e-52	1.14379e-50	11987
Lmntd1	12.1357	2.28124	0.62327	3.66012	0.0002521	0.000990829	74071
Ehd2	167.676	2.28029	0.222316	10.257	1.10089e-24	1.97987e-23	259300
C030047K22Rik	5.54515	2.27922	0.718502	3.17218	0.001513	0.00511604	77618
Tpm1	2540.97	2.27769	0.048217	47.2384	0	0	22003
Sh3bp4	1660.4	2.27692	0.0805931	28.252	1.34541e-175	3.78602e-173	98402
Galnt13	493.209	2.27623	0.147676	15.4137	1.32362e-53	6.00187e-52	271786
Cx3cl1	414.685	2.27557	0.141163	16.1201	1.84297e-58	9.36262e-57	20312
Gm43622	139.294	2.2746	0.221552	10.2666	9.96048e-25	1.79245e-23	NA
Tmem132c	72.8215	2.27068	0.351717	6.45598	1.07522e-10	8.77762e-10	208213
Slc22a21	32.6438	2.27029	0.402439	5.64132	1.68756e-08	1.14052e-07	56517
Gm5	7.43212	2.26992	0.71749	3.1637	0.00155776	0.00525459	194292
Gm38575	9.55118	2.26923	0.702917	3.22831	0.00124523	0.00429126	102641783
Dpp10	533.472	2.26921	0.167297	13.564	6.55038e-42	2.17359e-40	269109
Sox5os3	22.2709	2.26906	0.494334	4.59014	4.42952e-06	2.27687e-05	66760
Sash1	2064.36	2.26613	0.130355	17.3843	1.08483e-67	6.90417e-66	70097
Ednrb	5363.31	2.26606	0.135074	16.7765	3.62562e-63	2.06891e-61	13618
Ppic	237.426	2.26604	0.259676	8.72642	2.62865e-18	3.55562e-17	19038
Itgav	1949.17	2.26332	0.0926987	24.4159	1.16052e-131	1.99463e-129	16410
Gm37844	17.067	2.26139	0.37779	5.98585	2.1526e-09	1.57537e-08	NA
Anxa2	172.796	2.25824	0.255501	8.83849	9.70225e-19	1.33694e-17	12306
Ednra	70.4439	2.2582	0.438225	5.15307	2.56255e-07	1.52157e-06	13617
Marveld2	13.4243	2.25678	0.576416	3.91518	9.03352e-05	0.000384018	218518
Col8a2	16.3433	2.25199	0.653183	3.44772	0.00056533	0.00208141	329941
Gm26551	16.2225	2.25103	0.545736	4.12476	3.71117e-05	0.00016852	NA
Inka2	1107.53	2.25078	0.118084	19.0608	5.35014e-81	4.31362e-79	109050
Abcb1b	58.1928	2.2502	0.332341	6.77075	1.28116e-11	1.12629e-10	18669
Tes	232.918	2.24797	0.186539	12.051	1.91668e-33	4.91201e-32	21753
2610203C22Rik	146.503	2.24649	0.385892	5.82155	5.83059e-09	4.12002e-08	72481
Gm44623	10.9244	2.24446	0.644959	3.48001	0.000501398	0.00186613	NA
Ltbp1	176.649	2.24411	0.284961	7.87514	3.40351e-15	3.86436e-14	268977
Nkd2	103.528	2.24	0.217225	10.3119	6.22494e-25	1.13014e-23	72293
Tmem176a	87.2322	2.23624	0.243632	9.17874	4.36154e-20	6.43978e-19	66058
Gm43937	47.515	2.2337	0.319122	6.99952	2.56846e-12	2.39962e-11	NA
Aebp1	170.894	2.23195	0.211268	10.5646	4.3502e-26	8.28009e-25	11568
Gm15940	35.1708	2.23126	0.472735	4.71989	2.35975e-06	1.25662e-05	NA
Ddx58	188.352	2.23065	0.255955	8.71501	2.90729e-18	3.92143e-17	230073
Gch1	15.9405	2.22939	0.610471	3.65191	0.000260295	0.00102024	14528
Bcl6b	146.365	2.22543	0.218311	10.1938	2.11288e-24	3.76449e-23	12029
Cmklr1	43.9332	2.2232	0.414624	5.36195	8.23269e-08	5.16961e-07	14747
Shroom4	379.035	2.21726	0.167777	13.2155	7.1403e-40	2.23498e-38	208431
Gm11574	7.36593	2.21685	0.624558	3.54947	0.000386014	0.0014671	NA
Uaca	828.803	2.21588	0.199731	11.0944	1.33609e-28	2.85129e-27	72565
Tbc1d2	28.0016	2.2158	0.376945	5.87832	4.14454e-09	2.95922e-08	381605
Gm43084	21.934	2.21299	0.505956	4.37387	1.22062e-05	5.92114e-05	NA
Col20a1	38.1777	2.21226	0.443573	4.98735	6.12118e-07	3.49019e-06	73368
Slc35g1	62.8907	2.21036	0.313495	7.0507	1.78023e-12	1.68418e-11	240660
2810468N07Rik	192.988	2.20639	0.170919	12.909	4.00623e-38	1.19285e-36	72834
Gm24620	40.113	2.20237	0.291465	7.55621	4.14983e-14	4.37592e-13	NA
Gm36933	50.7893	2.20234	0.489416	4.49994	6.79731e-06	3.41448e-05	NA
Tex16	19.9915	2.19765	0.53411	4.1146	3.87851e-05	0.000175508	83556
Gm44694	24.1792	2.19622	0.548638	4.00303	6.25356e-05	0.000274291	NA
Slc38a3	1580.96	2.1946	0.135241	16.2273	3.23444e-59	1.67276e-57	76257
Fbln7	38.6557	2.19435	0.277038	7.92075	2.36083e-15	2.71659e-14	70370
Snx25	877.656	2.19374	0.0833298	26.3259	9.68049e-153	2.08917e-150	102141
Gm10773	345.98	2.19065	0.102294	21.4153	9.62504e-102	1.0834e-99	100038465
A630014C17Rik	7.54125	2.18925	0.700925	3.12337	0.0017879	0.00594813	399633
Gm44424	11.9298	2.18655	0.641904	3.40635	0.000658366	0.00239902	NA
Gm17501	12.826	2.18405	0.51071	4.27651	1.89849e-05	8.95961e-05	100216343
Gm13856	8.09721	2.18357	0.726016	3.00761	0.00263308	0.00845763	100534641
Ncam2	2641.37	2.18256	0.0964958	22.6182	2.87182e-113	3.71306e-111	17968
D330050G23Rik	22.3044	2.18221	0.557103	3.91706	8.96339e-05	0.000381489	320975
Rasip1	147.111	2.18054	0.209898	10.3886	2.79457e-25	5.13196e-24	69903
Kcng2	17.5262	2.17942	0.574931	3.79075	0.000150192	0.000615411	240444
Chrdl1	216.57	2.17413	0.279994	7.76493	8.16935e-15	9.043e-14	83453
Pld5	49.6252	2.1708	0.2675	8.11516	4.85165e-16	5.85358e-15	319455
Slitrk6	85.6554	2.1706	0.315484	6.8802	5.97682e-12	5.39304e-11	239250
1700054O19Rik	13.6457	2.16991	0.60179	3.60576	0.000311237	0.00119992	74272
Sgk3	360.084	2.16969	0.12442	17.4384	4.21548e-68	2.71293e-66	170755
Susd4	439.578	2.16805	0.0964569	22.4768	6.99433e-112	8.96243e-110	96935
Faah	150.23	2.16633	0.281463	7.69668	1.39644e-14	1.51596e-13	14073
Gm7361	8.51561	2.15938	0.67941	3.17831	0.00148134	0.00502349	664837
Adgb	64.8332	2.15744	0.195181	11.0536	2.10671e-28	4.45606e-27	215772
Klf4	119.819	2.15642	0.337105	6.3969	1.58561e-10	1.27627e-09	16600
Gm12430	10.1694	2.14773	0.667167	3.21917	0.00128561	0.00441505	666473
Hps6	42.5142	2.14654	0.393612	5.45345	4.94032e-08	3.1716e-07	20170
Piezo2	131.491	2.14638	0.272307	7.8822	3.21679e-15	3.66104e-14	667742
Adamts14	22.5604	2.14408	0.384501	5.57626	2.45744e-08	1.63391e-07	237360
Grasp	613.801	2.14369	0.0980588	21.8613	6.07201e-106	7.11367e-104	56149
Gm37016	10.8971	2.14224	0.643666	3.32819	0.00087412	0.00310518	NA
Upp1	10.2831	2.14191	0.557548	3.84167	0.0001222	0.000509145	22271
Adamts12	95.3294	2.14089	0.222995	9.60062	7.94617e-22	1.27418e-20	239337
Gltp	356.014	2.13697	0.126114	16.9448	2.10353e-64	1.22969e-62	56356
Emilin2	55.964	2.13246	0.396828	5.37378	7.71034e-08	4.85755e-07	246707
Gabrg1	610.448	2.13245	0.103056	20.6922	4.07143e-95	4.21885e-93	14405
Unc5c	966.755	2.13201	0.0894885	23.8245	1.86383e-125	2.86082e-123	22253
Ermp1	794.207	2.13121	0.0951367	22.4016	3.80008e-111	4.82627e-109	226090
Crtap	147.154	2.13005	0.240462	8.85815	8.13526e-19	1.12642e-17	56693
Id3	163.076	2.12974	0.273075	7.79911	6.23465e-15	6.95234e-14	15903
9930012K11Rik	27.2138	2.12939	0.474308	4.48947	7.13993e-06	3.57532e-05	268759
Bcam	91.3032	2.12911	0.222581	9.56554	1.1162e-21	1.77105e-20	57278
Slc8a3	458.607	2.12779	0.171825	12.3834	3.21238e-35	8.7481e-34	110893
Gm42902	22.2816	2.12764	0.514232	4.1375	3.51103e-05	0.000159888	NA
Dusp5	28.0181	2.12657	0.609335	3.48999	0.000483043	0.00180179	240672
Ptprg	3185.94	2.12554	0.0638648	33.2819	7.05631e-243	4.13341e-240	19270
Smtn	493.504	2.12399	0.135589	15.6649	2.62725e-55	1.25683e-53	29856
Zic3	241.456	2.12395	0.267511	7.93965	2.02745e-15	2.35032e-14	22773
Gm32432	133.6	2.12385	0.216703	9.80076	1.11745e-22	1.85508e-21	102634983
Irgm2	37.376	2.12121	0.444771	4.76921	1.8495e-06	9.96926e-06	54396
Sipa1	399.563	2.12077	0.187481	11.3119	1.14566e-29	2.54716e-28	20469
9330118I20Rik	13.9821	2.11733	0.453286	4.67108	2.99619e-06	1.57451e-05	77508
Agt	68.0112	2.11611	0.653153	3.23984	0.00119597	0.0041354	11606
S100a11	97.4516	2.11465	0.275967	7.66268	1.82097e-14	1.95978e-13	20195
Lmo2	299.787	2.1124	0.207497	10.1804	2.426e-24	4.31166e-23	16909
Tns2	326.122	2.11195	0.136432	15.4799	4.74573e-54	2.19351e-52	209039
Ccdc3	19.0254	2.1105	0.563377	3.74616	0.000179559	0.000726206	74186
B3gat2	489.468	2.11005	0.133423	15.8148	2.46002e-56	1.19475e-54	280645
Klhl6	83.6544	2.10962	0.345146	6.11225	9.82344e-10	7.41031e-09	239743
Snx9	551.641	2.10883	0.0751408	28.0651	2.61648e-173	7.01877e-171	66616
Asah2	123.127	2.10874	0.323021	6.52818	6.65733e-11	5.5227e-10	54447
Grik4	361.318	2.10843	0.177649	11.8685	1.72558e-32	4.28453e-31	110637
Gm37767	15.6914	2.10632	0.651222	3.23441	0.00121895	0.00420726	NA
Fam241a	55.89	2.1038	0.401318	5.24222	1.58655e-07	9.64194e-07	70617
Myzap	40.6712	2.10285	0.375643	5.598	2.16844e-08	1.44881e-07	102371
Sox5os5	12.2265	2.10273	0.60574	3.47134	0.000517873	0.00192075	665149
Gm37452	27.9857	2.10173	0.596602	3.52284	0.000426952	0.00160845	NA
Rassf8	374.588	2.10108	0.181371	11.5844	4.94364e-31	1.16214e-29	71323
Tssk6	13.0023	2.09812	0.548978	3.82187	0.000132444	0.000547851	83984
Tmem154	40.4359	2.09515	0.515328	4.06567	4.78938e-05	0.000213661	320782
Anxa3	235.005	2.0941	0.391519	5.34866	8.86085e-08	5.54465e-07	11745
Ets1	925.183	2.09406	0.208099	10.0628	8.06685e-24	1.39652e-22	23871
Cited1	12.9252	2.0938	0.68104	3.07442	0.00210915	0.00691558	12705
Gm45168	6.78411	2.09359	0.708564	2.95469	0.00312986	0.00986671	NA
Trim25	293.418	2.0897	0.164352	12.7148	4.8946e-37	1.40912e-35	217069
Shisal1	787.57	2.08944	0.137032	15.2478	1.70145e-52	7.46739e-51	72301
Dusp6	579.822	2.08809	0.180178	11.5891	4.68094e-31	1.10219e-29	67603
Dennd2c	55.0063	2.08333	0.258762	8.05112	8.20365e-16	9.76646e-15	329727
Dram1	21.6254	2.0827	0.393646	5.2908	1.21783e-07	7.50438e-07	71712
Cd109	79.7707	2.08057	0.212705	9.78149	1.35207e-22	2.23938e-21	235505
Arhgap27	103.601	2.07879	0.305373	6.80736	9.94088e-12	8.82565e-11	544817
Megf6	318.853	2.07679	0.162338	12.793	1.79307e-37	5.24634e-36	230971
Spata5l1	11.7684	2.07661	0.534023	3.88862	0.000100817	0.000425488	214616
Gm8325	9.97844	2.07446	0.539596	3.84447	0.000120812	0.000503582	666853
Gm37827	24.7728	2.07	0.453947	4.55999	5.11549e-06	2.61217e-05	NA
Gm42584	22.4754	2.06831	0.623142	3.31916	0.000902898	0.00320265	NA
Gbp5	41.3949	2.06767	0.585315	3.53257	0.000411541	0.00155509	229898
Gm47982	18.1938	2.06517	0.531507	3.8855	0.000102121	0.000430423	NA
Gm38031	116.625	2.06093	0.234185	8.80045	1.36264e-18	1.86336e-17	NA
Rhbdf1	486.344	2.0589	0.13401	15.3638	2.86334e-53	1.28016e-51	13650
Abca8b	246.616	2.05465	0.192067	10.6976	1.04491e-26	2.04865e-25	27404
Tac1	156.293	2.05237	0.29175	7.03469	1.99701e-12	1.87997e-11	21333
Phldb1	5249.3	2.05233	0.0722146	28.4199	1.14894e-177	3.39979e-175	102693
Gm47988	12.928	2.05161	0.68297	3.00395	0.00266503	0.00854591	NA
Helz2	119.477	2.05159	0.339417	6.04445	1.49917e-09	1.11392e-08	229003
Gm32509	93.7554	2.05116	0.248192	8.26444	1.40353e-16	1.75231e-15	102635085
Adam9	1791.32	2.05113	0.0750337	27.3361	1.58139e-164	3.84667e-162	11502
Gm47047	24.8605	2.04805	0.422969	4.84209	1.28477e-06	7.04699e-06	NA
Lamc1	2627	2.04782	0.0854858	23.9551	8.17586e-127	1.31102e-124	226519
Podxl	762.641	2.04774	0.168171	12.1766	4.14395e-34	1.08823e-32	27205
Kcnj8	35.1771	2.04338	0.548676	3.7242	0.000195934	0.000786559	16523
Nhsl2	451.424	2.0391	0.150549	13.5444	8.55336e-42	2.82842e-40	100042480
Evpl	88.0131	2.039	0.369703	5.51524	3.48308e-08	2.27889e-07	14027
Npas3	1221.9	2.03854	0.0957979	21.2796	1.75325e-100	1.92075e-98	27386
Gm44891	40.1455	2.03739	0.373775	5.45084	5.01314e-08	3.21619e-07	NA
Heyl	120.243	2.03602	0.319443	6.37364	1.84595e-10	1.47753e-09	56198
Gm21814	16.0065	2.0354	0.546747	3.72274	0.000197072	0.000790574	436100
Col16a1	593.012	2.03249	0.177296	11.4639	2.00352e-30	4.58954e-29	107581
Inka1	34.5794	2.03055	0.49055	4.13934	3.48313e-05	0.000158768	68176
Morc4	203.136	2.02924	0.190894	10.6302	2.15735e-26	4.17548e-25	75746
Gm45767	77.8813	2.026	0.294999	6.86782	6.51905e-12	5.86204e-11	NA
Ccdc78	111.806	2.02592	0.26963	7.5137	5.74802e-14	6.00602e-13	381077
Gm38320	15.9349	2.02578	0.603152	3.35865	0.000783232	0.00280663	NA
Tomm6os	5.95916	2.02467	0.678185	2.98543	0.0028318	0.00903526	100415787
Irgm1	30.7743	2.02297	0.438736	4.6109	4.00933e-06	2.07276e-05	15944
Igsf9b	2859.02	2.02223	0.108493	18.6392	1.54453e-77	1.17593e-75	235086
Ahnak	1268.89	2.0218	0.236994	8.53101	1.45076e-17	1.89796e-16	66395
Gbp7	100.796	2.02051	0.194924	10.3656	3.55386e-25	6.49309e-24	229900
Map6d1	120.77	2.02004	0.23525	8.58679	8.94328e-18	1.18023e-16	208158
Mmp2	137.227	2.01553	0.245725	8.20241	2.35625e-16	2.90388e-15	17390
Phlda3	37.4498	2.01484	0.355666	5.66497	1.47051e-08	9.99241e-08	27280
Zcchc24	1474.66	2.01289	0.0654191	30.7692	6.77674e-208	2.90318e-205	71918
Klrg2	15.9465	2.01257	0.543722	3.70146	0.00021436	0.000853839	74253
Gm9750	15.1058	2.01105	0.500959	4.0144	5.95966e-05	0.000262282	623810
Tfeb	96.6123	2.01055	0.237863	8.45252	2.85079e-17	3.68587e-16	21425
Gm38059	23.2568	2.00487	0.385293	5.2035	1.95567e-07	1.17656e-06	NA
Vamp8	10.5601	2.00482	0.663252	3.02271	0.00250525	0.00808229	22320
Zswim7	24.6569	2.00312	0.370584	5.4053	6.47013e-08	4.10958e-07	69747
Gm31172	10.5479	2.00304	0.663369	3.0195	0.00253194	0.00815922	102633317
Gm29443	22.4465	2.00301	0.403728	4.96127	7.00338e-07	3.9625e-06	102634559
Rinl	28.3346	2.00258	0.564424	3.54801	0.000388146	0.00147445	320435
5031434C07Rik	60.1647	2.00208	0.262335	7.63178	2.31528e-14	2.47691e-13	100503613
Tmem204	102.38	2.00112	0.204507	9.78511	1.30448e-22	2.1618e-21	407831
Zfp979	30.4739	2.00086	0.617807	3.23865	0.00120095	0.00415063	112422
Cntn6	191.202	1.99825	0.224708	8.89265	5.96699e-19	8.32218e-18	53870
Adamts16	52.5548	1.99533	0.38524	5.17943	2.2256e-07	1.33057e-06	271127
H2-D1	282.188	1.99514	0.176158	11.3258	9.77676e-30	2.17705e-28	14964
Nap1l5	964.345	1.99479	0.0707905	28.1788	1.06478e-174	2.88324e-172	58243
Necab2	192.961	1.99347	0.157962	12.6199	1.63931e-36	4.65411e-35	117148
Gm44080	16.0765	1.99108	0.508954	3.9121	9.14975e-05	0.000388786	NA
Frrs1	114.352	1.99008	0.238198	8.35473	6.55848e-17	8.32219e-16	20321
Kcna5	60.3132	1.98826	0.27974	7.10755	1.18124e-12	1.13131e-11	16493
4930517E11Rik	66.101	1.98707	0.212526	9.34977	8.78372e-21	1.33679e-19	74702
Gm10419	59.5197	1.98648	0.308031	6.44897	1.12614e-10	9.1724e-10	100503802
Slc1a6	61.7341	1.98589	0.271987	7.30142	2.84752e-13	2.85478e-12	20513
Kcnc4	48.416	1.98564	0.421157	4.71472	2.42043e-06	1.2875e-05	99738
Kank3	239.297	1.98374	0.192554	10.3023	6.88123e-25	1.24771e-23	80880
Trib1	323.796	1.98255	0.120666	16.4301	1.16459e-60	6.24809e-59	211770
Gm11872	26.2496	1.98243	0.378382	5.23923	1.61249e-07	9.79543e-07	102632436
4930588J15Rik	33.4072	1.98087	0.357381	5.54275	2.97754e-08	1.96425e-07	67740
Mgll	366.913	1.97936	0.172431	11.4791	1.68054e-30	3.8682e-29	23945
Prr5l	55.7259	1.97917	0.40094	4.93632	7.96094e-07	4.47957e-06	72446
Arsj	11.2527	1.97781	0.511389	3.86754	0.000109941	0.000460946	271970
Fzd10	16.2636	1.97748	0.556568	3.55299	0.000380878	0.00144914	93897
Gm25897	12.5366	1.97625	0.664663	2.97331	0.00294605	0.00935818	NA
Sh3gl3	559.743	1.976	0.114354	17.2796	6.69614e-67	4.16918e-65	20408
Gpc5	308.697	1.97492	0.199051	9.92169	3.35046e-23	5.65363e-22	103978
Tspan12	422.403	1.97432	0.134124	14.7202	4.78491e-49	1.91017e-47	269831
Shroom1	81.2716	1.97105	0.34161	5.76989	7.93232e-09	5.54374e-08	71774
Itga8	89.2654	1.96946	0.287957	6.83941	7.95218e-12	7.10621e-11	241226
Vsig2	63.3246	1.96561	0.273648	7.18299	6.82014e-13	6.64941e-12	57276
P3h2	43.5556	1.96364	0.368116	5.33429	9.59174e-08	5.97595e-07	210530
Gm45722	19.141	1.96253	0.512681	3.82797	0.000129206	0.000535382	NA
Cgas	26.3313	1.9623	0.56435	3.47711	0.000506856	0.00188376	214763
Fam149a	273.094	1.96166	0.176214	11.1322	8.74267e-29	1.8783e-27	212326
Shisa6	731.027	1.95761	0.137762	14.21	7.93725e-46	2.92832e-44	380702
Slc43a3	65.9623	1.95613	0.245451	7.96953	1.59285e-15	1.85701e-14	58207
Gm44745	93.6558	1.95564	0.218528	8.94917	3.58173e-19	5.05938e-18	NA
F2rl2	33.154	1.95497	0.373436	5.2351	1.64899e-07	1.00044e-06	14064
Plk3	82.2612	1.95478	0.323494	6.0427	1.51553e-09	1.1252e-08	12795
Tfrc	1930.2	1.95339	0.164679	11.8618	1.86946e-32	4.63778e-31	22042
Tstd3	75.304	1.95321	0.274083	7.12637	1.03051e-12	9.92242e-12	77032
Pth1r	64.3031	1.95243	0.349928	5.57953	2.41169e-08	1.60572e-07	19228
Grid2	768.251	1.95142	0.101065	19.3085	4.55256e-83	3.87842e-81	14804
Lmo1	72.6507	1.95116	0.291445	6.69478	2.15996e-11	1.8657e-10	109594
Metrn	548.855	1.95025	0.126872	15.3717	2.53279e-53	1.13591e-51	70083
Vwc2	78.776	1.94691	0.268615	7.24796	4.23105e-13	4.19061e-12	319922
Sgsh	57.8196	1.94655	0.270654	7.19204	6.38322e-13	6.23401e-12	27029
Prkcb	2273.44	1.94141	0.0515361	37.6708	0	0	18751
Nlrc3	133.868	1.94107	0.299986	6.47051	9.76705e-11	8.00524e-10	268857
Stat6	103.565	1.94021	0.314764	6.16401	7.09235e-10	5.40408e-09	20852
Col26a1	137.511	1.93924	0.281721	6.88354	5.83813e-12	5.2761e-11	140709
Gm37033	139.64	1.93618	0.215955	8.96568	3.08372e-19	4.37096e-18	NA
Unc5b	192.645	1.93571	0.255263	7.5832	3.37138e-14	3.5708e-13	107449
Gm44005	61.1429	1.93413	0.301197	6.42148	1.34953e-10	1.0933e-09	NA
Gm5415	34.6845	1.93373	0.398221	4.85591	1.19833e-06	6.59551e-06	408191
Pcsk6	394.427	1.9333	0.126833	15.2429	1.8367e-52	8.04869e-51	18553
Tns3	2868.13	1.93279	0.0980686	19.7085	1.82211e-86	1.63438e-84	319939
AC113599.1	31.0247	1.93039	0.403421	4.78506	1.70938e-06	9.23999e-06	NA
9430021M05Rik	30.6123	1.92971	0.446345	4.32335	1.53677e-05	7.34674e-05	77288
Mamld1	664.438	1.92789	0.0817585	23.5803	6.13897e-123	9.17745e-121	333639
Adora1	533.617	1.92714	0.138083	13.9564	2.87676e-44	1.01315e-42	11539
Abhd3	117.315	1.92461	0.265545	7.24778	4.23648e-13	4.19454e-12	106861
Sema5a	2393.11	1.92383	0.0729499	26.372	2.8742e-153	6.24987e-151	20356
Cpne7	49.6281	1.92289	0.408695	4.70494	2.53935e-06	1.34602e-05	102278
Trim7	31.1359	1.92032	0.464785	4.13163	3.60195e-05	0.000163794	94089
Gm47087	1282.72	1.91931	0.0831464	23.0835	6.77885e-118	9.22148e-116	NA
Sdc3	6895.93	1.91806	0.0691611	27.7332	2.78187e-169	7.25892e-167	20970
Itgal	60.7601	1.9141	0.441954	4.33101	1.4843e-05	7.11012e-05	16408
Adgrl3	3424.37	1.91272	0.0895428	21.361	3.08309e-101	3.44335e-99	319387
Sox6	4693.38	1.91233	0.0695355	27.5015	1.68507e-166	4.24267e-164	20679
Cd248	177.014	1.90926	0.261815	7.29241	3.04466e-13	3.04391e-12	70445
Ache	151.424	1.90869	0.148347	12.8664	6.95904e-38	2.05923e-36	11423
Rhbdf2	35.0209	1.90826	0.537099	3.5529	0.000381003	0.00144943	217344
Hmgb4os	18.9784	1.90661	0.495866	3.84501	0.000120548	0.000502627	75242
Gfra2	180.498	1.90638	0.197307	9.66202	4.37169e-22	7.08129e-21	14586
Cd59a	19.6928	1.90511	0.60557	3.14597	0.00165536	0.00554807	12509
Gm37551	74.5183	1.9049	0.340413	5.59586	2.19535e-08	1.4661e-07	NA
Tpd52l1	89.6017	1.90271	0.232986	8.16664	3.17106e-16	3.86656e-15	21987
Pdzd3	12.2777	1.89973	0.483267	3.93102	8.45869e-05	0.000361725	170761
Gpr158	348.713	1.89957	0.0943555	20.1321	3.86416e-90	3.73445e-88	241263
Ppnr	203.532	1.8946	0.178147	10.6351	2.04701e-26	3.9646e-25	26930
Sox6os	32.5502	1.89434	0.60637	3.12406	0.00178374	0.00593744	68469
F11r	75.942	1.89301	0.523349	3.61711	0.000297909	0.00115297	16456
Erap1	158.538	1.8916	0.244763	7.72831	1.08988e-14	1.19628e-13	80898
C130083M11Rik	29.0089	1.8874	0.443469	4.25599	2.08129e-05	9.77888e-05	414111
Vstm2b	502.89	1.88562	0.12143	15.5285	2.22558e-54	1.03367e-52	58188
Col24a1	62.4276	1.88306	0.44398	4.24131	2.22217e-05	0.000104068	71355
Exoc3l	67.9696	1.88157	0.284878	6.60484	3.97957e-11	3.35464e-10	277978
Phxr4	248.226	1.88153	0.109041	17.2552	1.0224e-66	6.32453e-65	18689
Colec12	135.657	1.88054	0.301984	6.22729	4.74581e-10	3.6796e-09	140792
Tmem144	44.1622	1.87973	0.385149	4.88053	1.05804e-06	5.86497e-06	70652
Stom	182.564	1.87774	0.159956	11.7391	8.03541e-32	1.95293e-30	13830
Tmem176b	517.488	1.87742	0.124464	15.084	2.06444e-51	8.76563e-50	65963
Gm43864	68.4276	1.87739	0.342435	5.48246	4.1944e-08	2.71581e-07	NA
Gm45890	6.3346	1.87676	0.620393	3.02511	0.00248541	0.00802552	NA
Gm17571	108.658	1.8763	0.193336	9.70487	2.87442e-22	4.69575e-21	NA
Gm48091	24.0575	1.87501	0.611679	3.06534	0.00217421	0.00710433	NA
Gm45025	252.677	1.87484	0.131178	14.2924	2.44026e-46	9.10831e-45	NA
Nlgn1	998.447	1.87444	0.0683063	27.4417	8.73086e-166	2.16036e-163	192167
H2-K1	117.264	1.8744	0.213452	8.78136	1.61507e-18	2.20224e-17	14972
Sgms1	422.975	1.87389	0.0987141	18.983	2.35819e-80	1.87499e-78	208449
Sec11c	559.456	1.87337	0.132792	14.1076	3.41195e-45	1.2257e-43	66286
Il10rb	117.817	1.87322	0.284473	6.58486	4.55307e-11	3.81568e-10	16155
Col9a2	216.868	1.87263	0.121506	15.4118	1.36268e-53	6.16924e-52	12840
Gm42551	26.0279	1.87155	0.547197	3.42025	0.000625633	0.00228825	NA
Kcna6	459.833	1.86993	0.106016	17.6382	1.25362e-69	8.29091e-68	16494
Gm20559	23.3986	1.86971	0.327012	5.71755	1.08072e-08	7.46028e-08	330256
Hmox1	79.0261	1.86939	0.263821	7.08583	1.38211e-12	1.31752e-11	15368
1700066M21Rik	334.257	1.86721	0.127	14.7024	6.21808e-49	2.46857e-47	73467
Celrr	88.147	1.86706	0.207096	9.01545	1.96067e-19	2.80684e-18	98452
Gm26780	11.3568	1.86665	0.555291	3.36158	0.000774991	0.00277953	NA
2810442N19Rik	69.0694	1.86646	0.262255	7.11696	1.1033e-12	1.05984e-11	72753
Efcab1	59.9902	1.86502	0.439016	4.24819	2.15502e-05	0.000101104	66793
Smad9	32.601	1.86464	0.378204	4.93024	8.21283e-07	4.60918e-06	55994
A830092H15Rik	22.4348	1.86324	0.509374	3.65791	0.000254281	0.000998717	100379095
Sparc	3155.32	1.86197	0.197354	9.4347	3.92131e-21	6.04801e-20	20692
Phldb2	479.889	1.86175	0.170438	10.9234	8.91432e-28	1.83418e-26	208177
Fam98c	16.7573	1.86153	0.588218	3.1647	0.00155243	0.00523796	73833
Cdkn1c	107.513	1.86134	0.208368	8.93293	4.14874e-19	5.81735e-18	12577
Ramp1	327.621	1.86077	0.158447	11.7438	7.59592e-32	1.84924e-30	51801
Gm44416	26.31	1.86031	0.400689	4.64276	3.43778e-06	1.79083e-05	NA
Zc3hav1	131.065	1.8602	0.242418	7.67353	1.67327e-14	1.80624e-13	78781
Tmem132e	273.597	1.85529	0.159943	11.5997	4.1369e-31	9.74888e-30	270893
Dcaf12l1	148.5	1.85377	0.17774	10.4296	1.81567e-25	3.36226e-24	245404
Prkch	145.632	1.8536	0.264192	7.01611	2.28136e-12	2.13714e-11	18755
Gm39038	34.6609	1.85303	0.341284	5.42958	5.64862e-08	3.60695e-07	105242978
Nkd1	587.179	1.84906	0.113998	16.22	3.64059e-59	1.87942e-57	93960
Gm11767	7.92559	1.84801	0.612931	3.01504	0.00256942	0.00826887	102640451
Id1	80.661	1.84753	0.247224	7.4731	7.83263e-14	8.10162e-13	15901
Adamts8	47.9045	1.84753	0.476023	3.88117	0.000103956	0.00043745	30806
Fzd9	105.736	1.84359	0.214222	8.60598	7.56682e-18	1.00226e-16	14371
Itga5	238.34	1.84117	0.227335	8.09892	5.54471e-16	6.67855e-15	16402
Pcbd2	9.51835	1.84069	0.535572	3.43687	0.000588482	0.00216194	72562
Pcdh20	279.875	1.84002	0.144597	12.7251	4.28831e-37	1.2383e-35	219257
Mansc1	33.7614	1.83792	0.433348	4.24121	2.22316e-05	0.000104097	67729
Kcnip2	144.39	1.83555	0.214508	8.55699	1.1585e-17	1.52394e-16	80906
Cdh22	160.239	1.83373	0.199344	9.1988	3.61957e-20	5.3608e-19	104010
Wnt5b	21.4822	1.83241	0.429812	4.26328	2.01448e-05	9.48519e-05	22419
Kctd4	225.585	1.83023	0.147141	12.4386	1.61319e-35	4.44372e-34	67516
Slco2b1	413.676	1.82867	0.26109	7.00401	2.48738e-12	2.32709e-11	101488
Lrp1b	2351.8	1.82809	0.112017	16.3197	7.1454e-60	3.78403e-58	94217
Hes1	161.88	1.82759	0.271022	6.74334	1.54786e-11	1.35082e-10	15205
Ppard	497.995	1.82555	0.13992	13.0471	6.60326e-39	1.9993e-37	19015
Gm46123	107.121	1.82493	0.267499	6.82221	8.96507e-12	7.984e-11	108167668
D7Bwg0826e	10.0665	1.82478	0.504185	3.61927	0.000295431	0.00114498	52819
Sfmbt2	166.917	1.82456	0.180356	10.1164	4.67052e-24	8.20428e-23	353282
Srpk3	156.333	1.82423	0.189171	9.64329	5.24764e-22	8.47148e-21	56504
Metrnl	61.263	1.82286	0.224259	8.12838	4.35061e-16	5.26678e-15	210029
Gm22543	32.4418	1.82271	0.33486	5.4432	5.23305e-08	3.35127e-07	NA
Gpr165	84.9313	1.82209	0.358653	5.08036	3.76718e-07	2.1982e-06	76206
Nab2	316.016	1.82156	0.157691	11.5515	7.2557e-31	1.68632e-29	17937
Rarg	170.71	1.81974	0.260316	6.99051	2.73893e-12	2.55328e-11	19411
Cdhr1	24.778	1.81937	0.382048	4.76216	1.91535e-06	1.0294e-05	170677
Gm15383	17.0776	1.81815	0.570906	3.18468	0.00144915	0.00492657	100416388
Arhgef28	305.888	1.81813	0.13326	13.6435	2.20677e-42	7.39099e-41	110596
Cys1	31.0741	1.81794	0.380389	4.77916	1.76031e-06	9.4992e-06	12879
1700025N21Rik	34.0111	1.81727	0.468049	3.88264	0.000103328	0.000435062	69415
Zfp853	135.168	1.81579	0.297475	6.10399	1.03455e-09	7.79592e-09	330230
Gm15737	25.9394	1.81335	0.56499	3.20953	0.00132954	0.00455554	102633179
Gm45194	12.2614	1.81322	0.558223	3.2482	0.00116136	0.00402931	NA
Gm44832	24.1957	1.81286	0.443604	4.08666	4.37634e-05	0.000196487	NA
Eya1	453.146	1.81182	0.140897	12.8591	7.64204e-38	2.25436e-36	14048
Gm25265	22.6908	1.80958	0.483296	3.74425	0.000180936	0.000731158	NA
4430402I18Rik	34.5433	1.80929	0.271406	6.66636	2.62224e-11	2.24809e-10	381218
Lbh	1492.71	1.80783	0.0836283	21.6175	1.22998e-103	1.42355e-101	77889
Gpr52	31.113	1.80736	0.394742	4.57859	4.68129e-06	2.39856e-05	620246
Gm49907	25.3288	1.8055	0.429917	4.19965	2.67329e-05	0.00012386	NA
C1ql3	53.9544	1.80507	0.218067	8.27762	1.25661e-16	1.57367e-15	227580
Kcnj6	56.2548	1.80381	0.331474	5.44179	5.27489e-08	3.37657e-07	16522
Stambpl1	152.995	1.8034	0.174656	10.3254	5.40732e-25	9.84188e-24	76630
Myo1c	341.363	1.80296	0.172694	10.4402	1.62514e-25	3.01723e-24	17913
C2cd4d	40.6517	1.80294	0.251959	7.15567	8.32652e-13	8.08785e-12	271944
Gng12	1310.71	1.80207	0.140088	12.8639	7.19021e-38	2.12544e-36	14701
Fndc1	364.907	1.8004	0.140948	12.7735	2.30475e-37	6.70925e-36	68655
Maml2	2077.86	1.79997	0.0685411	26.2612	5.323e-152	1.13175e-149	270118
Gm43672	62.0305	1.798	0.278846	6.448	1.13332e-10	9.2283e-10	NA
Gm28523	15.7284	1.79717	0.607247	2.95954	0.00308098	0.00972971	102632597
Notum	26.9671	1.79408	0.578599	3.10072	0.00193049	0.00637127	77583
Gm44240	72.2211	1.79274	0.282864	6.3378	2.33077e-10	1.85113e-09	NA
Tcf7l2	906.226	1.79174	0.120976	14.8107	1.24919e-49	5.0931e-48	21416
Gm28319	14.2822	1.79083	0.567778	3.1541	0.00160994	0.00541229	NA
Moxd1	149.609	1.78974	0.266863	6.70661	1.99193e-11	1.7268e-10	59012
Klhl5	1459.08	1.78967	0.0813305	22.0049	2.58391e-107	3.10318e-105	71778
Swap70	585.071	1.78915	0.113388	15.7789	4.34406e-56	2.10621e-54	20947
4930583P06Rik	21.8212	1.78859	0.56785	3.14977	0.00163401	0.00548358	75946
Aard	28.8894	1.78584	0.308318	5.7922	6.94697e-09	4.87647e-08	239435
Itpr3	93.9653	1.78501	0.205137	8.70154	3.27404e-18	4.40782e-17	16440
3110082J24Rik	31.9975	1.78386	0.32619	5.46878	4.53156e-08	2.917e-07	433868
Pcsk5	186.402	1.78294	0.178019	10.0155	1.30317e-23	2.23446e-22	18552
Gm44071	14.2693	1.78181	0.489249	3.64193	0.0002706	0.00105746	NA
Rassf3	349.969	1.78172	0.15849	11.2418	2.54006e-29	5.54007e-28	192678
Kcnd2	1535.61	1.78171	0.107504	16.5734	1.08506e-61	6.0241e-60	16508
Arhgap10	191.317	1.78129	0.164429	10.8332	2.39712e-27	4.81824e-26	78514
Itpripl2	105.635	1.77913	0.15382	11.5663	6.10683e-31	1.42624e-29	319622
Sirt2	1735.6	1.7787	0.102179	17.4077	7.21727e-68	4.61375e-66	64383
Nmrk1	61.7658	1.77795	0.332719	5.34368	9.10778e-08	5.68924e-07	225994
S1pr5	13.7924	1.77645	0.59203	3.0006	0.00269447	0.00863067	94226
Tshz3	260.901	1.77355	0.226492	7.8305	4.8595e-15	5.45919e-14	243931
Rasa3	2187.93	1.77203	0.0804147	22.0361	1.29921e-107	1.56686e-105	19414
Gas6	491.766	1.76905	0.0968001	18.2753	1.30116e-74	9.38368e-73	14456
Masp1	651.722	1.76794	0.098827	17.8892	1.43053e-71	9.79963e-70	17174
Gm15631	25.8456	1.76779	0.566708	3.11939	0.00181223	0.00602182	102638038
Cdh6	629.74	1.76775	0.102061	17.3206	3.29175e-67	2.06747e-65	12563
Nova1	1455.82	1.76761	0.0687502	25.7106	8.8864e-146	1.74703e-143	664883
Epor	14.7947	1.76648	0.486849	3.62839	0.000285194	0.0011089	13857
Gm5617	15.1123	1.76643	0.533073	3.31367	0.000920811	0.00326055	434402
Prickle1	171.18	1.76392	0.183867	9.59346	8.51799e-22	1.36207e-20	106042
Gm44193	15.7778	1.76199	0.471486	3.73711	0.000186147	0.00075084	NA
Marveld1	220.588	1.76026	0.154456	11.3965	4.35112e-30	9.85717e-29	277010
Chpt1	607.78	1.75967	0.0915944	19.2115	2.9646e-82	2.45933e-80	212862
Dusp3	302.467	1.75898	0.161161	10.9144	9.83391e-28	2.02049e-26	72349
Gm26703	36.7388	1.75883	0.306144	5.74509	9.18705e-09	6.38489e-08	105246946
Gm5069	23.3619	1.75657	0.554288	3.16905	0.00152939	0.00516691	277333
Hip1	4696.2	1.75508	0.0512734	34.2299	8.69833e-257	5.54818e-254	215114
Nfatc2	182.595	1.75448	0.234885	7.46954	8.04753e-14	8.31791e-13	18019
Lrrtm3	617.285	1.7528	0.108111	16.2129	4.08491e-59	2.10501e-57	216028
Mmp16	1767.98	1.7524	0.0569462	30.773	6.02278e-208	2.61927e-205	17389
Pxmp2	11.2265	1.75171	0.451581	3.87905	0.000104863	0.000440945	19301
Prex1	3352.37	1.75112	0.0872173	20.0776	1.15743e-89	1.1074e-87	277360
S100a16	503.835	1.75099	0.115932	15.1036	1.53387e-51	6.52246e-50	67860
Usp24	5342.21	1.75093	0.0370012	47.3208	0	0	329908
Tec	81.1575	1.75011	0.252552	6.92971	4.21691e-12	3.87074e-11	21682
C1galt1	669.603	1.74811	0.145804	11.9894	4.03661e-33	1.02352e-31	94192
Gm42478	71.5901	1.74417	0.317503	5.4934	3.94262e-08	2.56436e-07	NA
Cspg5	5775.76	1.74369	0.0828129	21.0558	2.0232e-98	2.16687e-96	29873
Gm26797	11.5649	1.74226	0.523911	3.32549	0.000882632	0.00313387	108167690
Slc25a35	35.8569	1.74176	0.43816	3.97518	7.03272e-05	0.000305571	71998
Rhoc	228.804	1.74144	0.211152	8.24732	1.6198e-16	2.01357e-15	11853
Rab26	16.7344	1.73863	0.585664	2.96865	0.00299114	0.00948462	328778
Dap	192.878	1.73788	0.193443	8.98395	2.61223e-19	3.71183e-18	223453
Prr5	82.2132	1.73783	0.419939	4.13829	3.49898e-05	0.000159389	109270
Osbpl10	211.031	1.73782	0.18745	9.27089	1.84599e-20	2.77265e-19	74486
Esyt1	225.151	1.73654	0.127217	13.6502	2.0144e-42	6.7704e-41	23943
Stat1	77.4527	1.73342	0.18536	9.35164	8.62962e-21	1.31473e-19	20846
Arhgef15	262.858	1.73341	0.184654	9.3873	6.15597e-21	9.43882e-20	442801
Shcbp1l	67.3162	1.73339	0.289233	5.99307	2.05913e-09	1.50966e-08	71836
Mrgpre	60.4821	1.73227	0.255601	6.77723	1.22504e-11	1.08026e-10	244238
Gm20371	27.3135	1.73164	0.465204	3.72233	0.000197394	0.000791645	100504719
Ptprn	467.333	1.73018	0.143278	12.0757	1.4192e-33	3.66326e-32	19275
Gm15601	196.034	1.72733	0.155168	11.132	8.7618e-29	1.881e-27	NA
Gm14448	28.6692	1.72645	0.391383	4.41114	1.02827e-05	5.04347e-05	668972
Spred3	689.435	1.72534	0.0691563	24.9484	2.22258e-137	4.01224e-135	101809
Tex12	24.2834	1.72426	0.434048	3.97251	7.11196e-05	0.000308687	66654
Cmtm8	42.7178	1.724	0.395781	4.35593	1.32501e-05	6.38762e-05	70031
Shisa5	166.687	1.72314	0.196014	8.7909	1.48363e-18	2.02494e-17	66940
Cebpb	24.1437	1.72286	0.374457	4.60096	4.20549e-06	2.17027e-05	12608
Mob3c	52.9639	1.71979	0.343883	5.00109	5.70061e-07	3.26401e-06	100465
1500026H17Rik	9.21156	1.71747	0.492458	3.48754	0.000487482	0.00181717	69002
Fam189a1	115.934	1.71595	0.267763	6.40846	1.46996e-10	1.18751e-09	70638
Gm45424	18.7367	1.71557	0.358427	4.78638	1.69818e-06	9.18634e-06	NA
Mybl1	600.961	1.7152	0.138531	12.3814	3.29705e-35	8.97016e-34	17864
Arl5c	21.5831	1.71321	0.570304	3.00402	0.00266435	0.00854529	217151
Tanc1	858.881	1.71127	0.0794597	21.5363	7.1217e-103	8.20941e-101	66860
Txndc2	17.5793	1.7087	0.499606	3.4201	0.000625982	0.00228915	213272
Rpl17-ps9	11.9247	1.70594	0.472467	3.6107	0.000305373	0.00117922	100043872
Alpk1	25.3607	1.70558	0.393468	4.33474	1.45933e-05	6.9987e-05	71481
Gm47987	94.0826	1.70462	0.215997	7.89189	2.97641e-15	3.39555e-14	NA
AU022754	44.9558	1.70422	0.451922	3.77104	0.000162569	0.000661782	105975
Slc26a11	71.0716	1.70364	0.278344	6.12062	9.3212e-10	7.04255e-09	268512
Gpt2	1476.73	1.70362	0.0887886	19.1873	4.72405e-82	3.88523e-80	108682
Map3k1	2521.33	1.70319	0.0670405	25.4053	2.2014e-142	4.15703e-140	26401
Rap1gap	3043.91	1.70311	0.051167	33.2854	6.28292e-243	3.75706e-240	110351
Gm2824	67.1458	1.7019	0.250897	6.78326	1.17495e-11	1.03736e-10	100040529
Gm47493	31.8289	1.70171	0.372647	4.56655	4.9582e-06	2.53455e-05	NA
Lyz2	148.546	1.70097	0.465703	3.65248	0.00025972	0.00101845	17105
Tap2	48.3745	1.7008	0.288981	5.88552	3.96809e-09	2.84101e-08	21355
Hrc	14.4859	1.6999	0.505424	3.36332	0.000770124	0.00276518	15464
Gm16897	19.4137	1.69983	0.52009	3.26835	0.00108178	0.00377743	320400
Cdh10	651.88	1.69978	0.118256	14.3737	7.56492e-47	2.87217e-45	320873
Abca6	45.124	1.69605	0.347595	4.87939	1.06413e-06	5.8965e-06	76184
Pmp22	264.704	1.69433	0.236945	7.15073	8.63172e-13	8.37014e-12	18858
Abcc12	27.1301	1.69345	0.55758	3.03715	0.0023883	0.00773891	244562
Nxph1	591.312	1.69343	0.0931995	18.1699	8.93411e-74	6.36317e-72	18231
Fhl2	55.8475	1.69058	0.298059	5.67195	1.41183e-08	9.61189e-08	14200
5930409G06Rik	20.5659	1.68778	0.487805	3.45994	0.00054029	0.00199665	77066
Nox4	69.6296	1.68725	0.256054	6.58944	4.41481e-11	3.70413e-10	50490
1700030L22Rik	104.857	1.6867	0.227409	7.41706	1.19746e-13	1.2249e-12	75576
Rtkn	117.838	1.68582	0.175946	9.58143	9.57123e-22	1.5237e-20	20166
Sgcz	90.6694	1.68384	0.252504	6.66855	2.58344e-11	2.21549e-10	244431
Plat	515.706	1.68361	0.109678	15.3505	3.51291e-53	1.5657e-51	18791
Dok4	294.029	1.68216	0.177243	9.49069	2.2952e-21	3.57844e-20	114255
Gm48958	132.041	1.67952	0.199658	8.412	4.03083e-17	5.18355e-16	NA
Bhlhe40	348.013	1.6788	0.128343	13.0805	4.25387e-39	1.29479e-37	20893
Gm26037	17.158	1.6786	0.471917	3.55698	0.00037514	0.00142864	NA
Laptm4b	232.211	1.67848	0.127308	13.1845	1.07814e-39	3.34912e-38	114128
Mif4gd	110.584	1.67686	0.20535	8.16587	3.19132e-16	3.88961e-15	69674
Rasgrf1	356.741	1.67647	0.175095	9.57466	1.02193e-21	1.62416e-20	19417
1700071K01Rik	11.9781	1.67629	0.565152	2.96609	0.00301613	0.0095533	237880
Gsx1	185.895	1.67538	0.151508	11.058	2.00474e-28	4.24352e-27	14842
Lrp2bp	54.6113	1.67306	0.19302	8.66783	4.4044e-18	5.89093e-17	67620
Rnf135	25.5107	1.6714	0.336933	4.96062	7.02685e-07	3.975e-06	71956
Ampd3	978.881	1.67049	0.0849454	19.6654	4.2672e-86	3.80377e-84	11717
Epb41l2	3286.66	1.67024	0.136897	12.2008	3.0792e-34	8.13085e-33	13822
Syde1	210.158	1.66883	0.214844	7.76762	7.99718e-15	8.86952e-14	71709
Dkk2	27.8789	1.66852	0.407357	4.09597	4.20398e-05	0.000189192	56811
Lamb1	716.588	1.66851	0.250903	6.64999	2.93112e-11	2.50021e-10	16777
Samd4	339.723	1.66621	0.0955868	17.4314	4.76671e-68	3.06083e-66	74480
3110080E11Rik	151.672	1.66501	0.214413	7.76546	8.13472e-15	9.00814e-14	73219
Alcam	1928.08	1.66483	0.0702632	23.6943	4.13224e-124	6.27554e-122	11658
Rin3	116.495	1.66406	0.22426	7.42024	1.1691e-13	1.1976e-12	217835
Fam173a	333.501	1.66219	0.118892	13.9807	2.04391e-44	7.21602e-43	214917
Pla2g4a	40.2821	1.66189	0.433524	3.83346	0.000126355	0.000524629	18783
Gm37633	43.2243	1.66101	0.393543	4.22066	2.43587e-05	0.000113667	NA
Nudt7	12.8665	1.65944	0.519082	3.19688	0.00138924	0.00474197	67528
Gm26840	18.4696	1.65832	0.492868	3.36463	0.000766461	0.00275375	NA
Inpp4b	366.266	1.65821	0.200289	8.27912	1.24088e-16	1.55465e-15	234515
Spata6	157.121	1.65451	0.155915	10.6117	2.62998e-26	5.07314e-25	67946
Sema6d	4026.12	1.65437	0.0614877	26.9057	1.88601e-159	4.33072e-157	214968
Sntb2	143.283	1.65388	0.243919	6.78045	1.19804e-11	1.0571e-10	20650
Wwc2	616.872	1.65356	0.0910961	18.1518	1.24215e-73	8.80334e-72	52357
Slc30a1	71.177	1.65136	0.225226	7.332	2.26736e-13	2.28592e-12	22782
Abhd2	4363.7	1.65106	0.0544925	30.2989	1.18421e-201	4.59331e-199	54608
Gm49125	236.58	1.65019	0.180943	9.11995	7.51604e-20	1.09956e-18	NA
Gm47862	14.9323	1.65009	0.517477	3.18872	0.00142906	0.00486403	NA
Sorcs3	535.819	1.64679	0.136174	12.0932	1.14688e-33	2.96834e-32	66673
Asb18	19.9425	1.64416	0.457964	3.59016	0.000330481	0.00126968	208372
Polg	2045.78	1.64163	0.0664307	24.7118	7.98037e-135	1.41395e-132	18975
Tesmin	22.7719	1.64128	0.535806	3.06319	0.00218992	0.00714855	17771
Tcaf2	53.8609	1.64112	0.479211	3.42463	0.000615636	0.00225563	232748
Mkx	16.9632	1.63985	0.5147	3.18603	0.00144239	0.0049065	210719
4930471G03Rik	21.6071	1.63931	0.428529	3.82543	0.000130543	0.000540534	74966
Arl4a	1282.58	1.63921	0.0807061	20.3108	1.03143e-91	1.02087e-89	11861
Gm16347	36.8417	1.63581	0.371371	4.40479	1.05885e-05	5.17491e-05	102639135
Kit	777.29	1.63476	0.0898673	18.1908	6.10222e-74	4.35702e-72	16590
Gm16132	16.8514	1.63263	0.492899	3.31231	0.000925292	0.003274	NA
Nudt17	38.1336	1.63	0.301686	5.40298	6.55431e-08	4.16029e-07	78373
Zfp36l1	1436.06	1.62912	0.0856489	19.0209	1.14396e-80	9.17178e-79	12192
5830468F06Rik	12.7203	1.62711	0.479743	3.39163	0.000694775	0.0025189	76082
Gm16894	21.7598	1.62619	0.425649	3.82049	0.000133187	0.000550686	100047133
Igfbp2	634.574	1.62552	0.138193	11.7627	6.07903e-32	1.48625e-30	16008
Cmtm5	86.8408	1.62294	0.296399	5.47553	4.36195e-08	2.81604e-07	67272
Myh9	5298.01	1.62292	0.108248	14.9927	8.19947e-51	3.44078e-49	17886
Elfn2	1111.7	1.62252	0.107191	15.1367	9.26855e-52	3.98854e-50	207393
Prss36	16.302	1.62228	0.463396	3.50086	0.000463761	0.0017337	77613
Lrig1	1155.29	1.6213	0.127799	12.6863	7.04319e-37	2.01556e-35	16206
Nrarp	68.9015	1.62051	0.188519	8.596	8.25416e-18	1.09079e-16	67122
Sntg1	447.102	1.6202	0.135698	11.9398	7.34333e-33	1.83923e-31	71096
Folh1	42.2627	1.61963	0.444789	3.64135	0.000271213	0.00105942	53320
Tal1	37.787	1.61914	0.44642	3.62694	0.000286805	0.00111426	21349
Enpp1	27.8776	1.61283	0.335857	4.80214	1.56978e-06	8.53358e-06	18605
Orai1	146.264	1.61277	0.177867	9.06727	1.22034e-19	1.76639e-18	109305
Gm44229	31.4789	1.61219	0.436648	3.69219	0.000222327	0.00088288	NA
Gm48542	167.095	1.61196	0.191815	8.40375	4.32427e-17	5.53858e-16	NA
Taf9b	211.053	1.60831	0.205755	7.81664	5.42498e-15	6.07069e-14	407786
6030400A10Rik	118.801	1.60732	0.171598	9.36679	7.47736e-21	1.14404e-19	77069
Gm15820	29.3367	1.60635	0.427935	3.75372	0.000174231	0.000706348	NA
Gm16499	54.0698	1.60593	0.286113	5.61293	1.98925e-08	1.33561e-07	100049166
Gm44417	54.9635	1.60568	0.257324	6.23994	4.3774e-10	3.40315e-09	NA
Il13ra1	52.5062	1.60559	0.325662	4.93022	8.21375e-07	4.60918e-06	16164
Gm37969	33.5042	1.60533	0.487535	3.29275	0.00099213	0.00348898	NA
Trib2	2558.27	1.604	0.0464174	34.556	1.15724e-261	8.1015e-259	217410
Bend4	364.969	1.60291	0.153455	10.4454	1.53736e-25	2.86166e-24	666938
1700025G04Rik	1345.34	1.60131	0.0808125	19.8151	2.20424e-87	2.00852e-85	69399
Ablim1	1175.2	1.59964	0.231688	6.90428	5.04577e-12	4.59336e-11	226251
Crybg3	762.873	1.59848	0.141969	11.2594	2.08218e-29	4.5622e-28	224273
Clec2d	59.8837	1.5983	0.378505	4.22265	2.41442e-05	0.000112758	93694
Map7	287.263	1.59805	0.131769	12.1277	7.53728e-34	1.9614e-32	17761
G630022F23Rik	31.7541	1.59473	0.299226	5.32951	9.84791e-08	6.12225e-07	100048901
Pald1	297.839	1.5945	0.143499	11.1116	1.10173e-28	2.35816e-27	27355
Atp8b1	21.2434	1.59373	0.535838	2.97428	0.00293679	0.00933202	54670
Gm44241	15.357	1.59355	0.505389	3.15311	0.00161538	0.00542804	NA
Rimbp2	597.299	1.59329	0.10613	15.0126	6.07249e-51	2.5557e-49	231760
Dll3	324.43	1.59157	0.113788	13.9871	1.86879e-44	6.61404e-43	13389
Gm49417	19.5085	1.59081	0.520005	3.05922	0.00221917	0.00723417	NA
Vstm4	46.9724	1.58878	0.300547	5.28628	1.24827e-07	7.68206e-07	320736
Gm42983	12.7092	1.58855	0.40868	3.88703	0.000101477	0.000428084	NA
Antxr1	921.797	1.58842	0.0932141	17.0406	4.10825e-65	2.44139e-63	69538
Tmem88	20.0056	1.58803	0.451423	3.51784	0.000435076	0.00163562	67020
Slitrk4	216.132	1.58694	0.151133	10.5003	8.61141e-26	1.61869e-24	245446
Gm42639	64.8665	1.58357	0.349667	4.5288	5.93205e-06	3.0056e-05	NA
Itgb8	2578.43	1.58289	0.0691985	22.8746	8.32133e-116	1.10068e-113	320910
AC241534.1	22.1304	1.58171	0.4219	3.74902	0.000177528	0.000718497	NA
A930033H14Rik	55.6781	1.58033	0.232581	6.79473	1.08518e-11	9.60765e-11	320700
Pgpep1	383.706	1.57947	0.0957905	16.4888	4.41562e-61	2.39587e-59	66522
Col5a1	206.801	1.57909	0.164394	9.60547	7.58139e-22	1.21705e-20	12831
Gm26669	21.2573	1.57853	0.341667	4.62007	3.83615e-06	1.98609e-05	NA
Pvr	193.318	1.57721	0.243743	6.47077	9.75025e-11	7.99376e-10	52118
Gab3	53.4119	1.57622	0.399496	3.94552	7.96269e-05	0.000342607	210710
Acot2	187.049	1.5748	0.156094	10.0888	6.19452e-24	1.07693e-22	171210
Dera	44.9441	1.57337	0.298374	5.27313	1.34117e-07	8.21853e-07	232449
Grid1	919.745	1.57323	0.106752	14.7373	3.71376e-49	1.49086e-47	14803
A230077H06Rik	169.69	1.57322	0.201801	7.7959	6.39526e-15	7.1259e-14	320210
Cd9	610.018	1.57271	0.10935	14.3823	6.68379e-47	2.55113e-45	12527
Cd44	223.779	1.57125	0.21705	7.2391	4.51684e-13	4.46135e-12	12505
Cnksr3	208.409	1.57107	0.152844	10.279	8.76663e-25	1.58356e-23	215748
Klf10	390.734	1.57096	0.0889974	17.6517	9.86963e-70	6.54245e-68	21847
Usp51	170.135	1.57094	0.202695	7.75027	9.16996e-15	1.01311e-13	635253
Rras	58.7662	1.56989	0.340055	4.61657	3.90133e-06	2.01875e-05	20130
Gm16168	51.1921	1.56352	0.263444	5.93493	2.93969e-09	2.12753e-08	102639507
Zfp960	37.3647	1.56307	0.353566	4.42087	9.83046e-06	4.8324e-05	449000
Rrbp1	2924.86	1.56285	0.10054	15.5445	1.73335e-54	8.07666e-53	81910
Phlda1	282.356	1.56258	0.107157	14.5822	3.6463e-48	1.42588e-46	21664
Ltbp4	458.792	1.56146	0.154482	10.1077	5.10613e-24	8.93666e-23	108075
Zbtb7c	126.598	1.55879	0.275881	5.65025	1.60215e-08	1.08485e-07	207259
5330437M03Rik	59.3939	1.55803	0.229278	6.79534	1.08055e-11	9.56955e-11	320746
Gm43594	71.8149	1.55706	0.302701	5.14389	2.69112e-07	1.5956e-06	NA
Zfp69	87.4285	1.55684	0.191222	8.14156	3.90219e-16	4.74194e-15	381549
Serpinh1	1149.07	1.55619	0.190454	8.17095	3.05972e-16	3.73874e-15	12406
Dusp23	18.3769	1.55567	0.522366	2.97812	0.00290018	0.00922983	68440
Gm16008	47.7505	1.55461	0.259276	5.99597	2.02275e-09	1.48526e-08	NA
Trim68	161.261	1.55411	0.167256	9.29182	1.51676e-20	2.28894e-19	101700
Sema6a	4900.73	1.55355	0.0874992	17.755	1.5767e-70	1.06235e-68	20358
Mdga2	1502.72	1.55234	0.0916795	16.9322	2.60471e-64	1.51649e-62	320772
Gm4735	14.6225	1.55218	0.489851	3.16867	0.00153136	0.00517295	103324
Ttc7	51.1755	1.55136	0.317744	4.88242	1.04792e-06	5.81339e-06	225049
Lcp1	249.016	1.55069	0.243178	6.37675	1.80882e-10	1.44902e-09	18826
Gm48602	167.899	1.54848	0.215302	7.19211	6.37957e-13	6.23257e-12	NA
Gm12568	60.404	1.54756	0.230795	6.70533	2.00946e-11	1.74042e-10	100038833
1110015O18Rik	193.675	1.54733	0.206692	7.48615	7.0923e-14	7.35177e-13	100503859
Scarb1	615.645	1.54722	0.0807097	19.1702	6.56209e-82	5.38147e-80	20778
Gm8995	68.4198	1.54664	0.249032	6.21059	5.27851e-10	4.07501e-09	668139
Dhrs11	33.4581	1.5463	0.441632	3.50132	0.000462952	0.0017309	192970
Slc44a1	1150.49	1.5447	0.091287	16.9213	3.13369e-64	1.82078e-62	100434
Ror2	69.7312	1.54385	0.262497	5.88139	4.06839e-09	2.90992e-08	26564
Ralb	314.291	1.54351	0.0999784	15.4384	9.03129e-54	4.13437e-52	64143
Hbegf	160.327	1.54252	0.169667	9.09151	9.76744e-20	1.42096e-18	15200
Sesn2	97.1516	1.54231	0.249343	6.18551	6.1901e-10	4.74685e-09	230784
Mpzl1	1202.43	1.54069	0.0823149	18.717	3.59959e-78	2.76254e-76	68481
Gm37474	46.9967	1.53997	0.412579	3.73255	0.000189553	0.000762862	NA
Prickle3	34.9076	1.53955	0.329472	4.67278	2.97144e-06	1.56207e-05	54630
Zfp58	27.0482	1.5393	0.313344	4.9125	8.99223e-07	5.02246e-06	238693
Blvra	129.781	1.53825	0.145366	10.5819	3.61497e-26	6.92198e-25	109778
Lipa	286.88	1.53804	0.129029	11.92	9.30652e-33	2.32283e-31	16889
Kcna2	1141.96	1.53612	0.0764595	20.0906	8.92135e-90	8.56419e-88	16490
Selenov	12.9561	1.53569	0.50004	3.07114	0.0021324	0.00698701	280621
Lgr5	48.9307	1.53272	0.278152	5.51037	3.58088e-08	2.34021e-07	14160
Gm49702	46.7068	1.53218	0.292479	5.2386	1.61801e-07	9.82273e-07	NA
Gm48543	57.9544	1.53077	0.361232	4.23765	2.25875e-05	0.000105677	NA
Casp8	154.357	1.53005	0.198398	7.712	1.23862e-14	1.3523e-13	12370
Ildr2	843.719	1.52731	0.0890717	17.147	6.61878e-66	4.0421e-64	100039795
Ryr3	1155.48	1.52629	0.10817	14.1102	3.28674e-45	1.18368e-43	20192
Gm18325	30.5074	1.52588	0.480428	3.17608	0.00149282	0.00505706	100416930
Prrx1	514.996	1.52577	0.151151	10.0943	5.85196e-24	1.01985e-22	18933
Fgd5	462.942	1.52391	0.182854	8.33403	7.81383e-17	9.85848e-16	232237
Ets2	424.092	1.52237	0.158044	9.63256	5.82599e-22	9.38929e-21	23872
Cdc14b	105.045	1.51736	0.218504	6.94431	3.80307e-12	3.50545e-11	218294
Sspn	101.789	1.517	0.238841	6.3515	2.13221e-10	1.69861e-09	16651
Slc46a3	182.894	1.51622	0.212142	7.14718	8.85808e-13	8.57806e-12	71706
Svil	1732.94	1.5148	0.086108	17.5919	2.84317e-69	1.87173e-67	225115
Pros1	270.927	1.51182	0.157583	9.59379	8.49102e-22	1.35852e-20	19128
Hap1	1555.94	1.50979	0.113719	13.2765	3.16832e-40	1.00265e-38	15114
Nr3c1	896.89	1.50924	0.074191	20.3427	5.39147e-92	5.35472e-90	14815
Cdkn1a	77.3284	1.50801	0.228069	6.61208	3.78946e-11	3.20191e-10	12575
Ece1	1245.23	1.50703	0.0883959	17.0487	3.57635e-65	2.12971e-63	230857
Vipr2	207.191	1.50541	0.139761	10.7713	4.70309e-27	9.34206e-26	22355
Lifr	982.861	1.50532	0.0850731	17.6945	4.62654e-70	3.09547e-68	16880
Unc13c	309.044	1.50518	0.310929	4.8409	1.29254e-06	7.08685e-06	208898
Myl12a	232.77	1.50504	0.221055	6.80845	9.86543e-12	8.76679e-11	67268
2310015A10Rik	141.106	1.50418	0.236191	6.36848	1.90907e-10	1.52592e-09	69548
Acacb	62.7789	1.50282	0.189948	7.91175	2.53791e-15	2.91615e-14	100705
Pitpnm2os1	21.886	1.50152	0.498113	3.01442	0.00257468	0.00828488	75927
Igsf10	806.494	1.50078	0.106166	14.1361	2.27444e-45	8.23245e-44	242050
Gm44230	88.7725	1.50014	0.322378	4.65338	3.26542e-06	1.70724e-05	NA
Slc3a2	1274.49	1.49979	0.101984	14.7061	5.89397e-49	2.34639e-47	17254
Il4ra	97.6482	1.4986	0.271566	5.51835	3.42189e-08	2.24141e-07	16190
Gm15834	32.9707	1.49759	0.496971	3.01343	0.00258313	0.0083102	100504455
St5	663.814	1.49693	0.126623	11.822	3.00564e-32	7.41797e-31	76954
Ctnna3	37.1248	1.49684	0.337834	4.43071	9.39249e-06	4.63377e-05	216033
Gm48536	23.7506	1.49505	0.455128	3.28489	0.00102022	0.00357942	NA
Lnx2	157.712	1.49421	0.174632	8.55633	1.16519e-17	1.53204e-16	140887
Bspry	27.6966	1.4919	0.470372	3.17174	0.00151531	0.00512176	192120
Gm10257	10.2225	1.48962	0.433483	3.43639	0.000589517	0.00216518	544973
Gm48600	118.45	1.48951	0.219481	6.7865	1.14883e-11	1.01461e-10	NA
Wnt7b	353.024	1.48938	0.208768	7.13413	9.73984e-13	9.40022e-12	22422
Plekhg5	531.544	1.48881	0.131432	11.3276	9.57585e-30	2.13397e-28	269608
Car10	73.0025	1.48879	0.216164	6.8873	5.68628e-12	5.14544e-11	72605
Krt222	62.0187	1.48835	0.289677	5.13798	2.77708e-07	1.64386e-06	268481
Hip1r	2026.7	1.48775	0.0861141	17.2766	7.0636e-67	4.38845e-65	29816
Tmprss5	17.9458	1.48761	0.439113	3.38776	0.000704663	0.00255152	80893
Vat1l	397.95	1.48727	0.0928717	16.0142	1.01635e-57	5.10005e-56	270097
Gm42731	93.785	1.48715	0.335174	4.43695	9.12419e-06	4.51148e-05	NA
Cercam	112.285	1.48629	0.181808	8.17503	2.95785e-16	3.61888e-15	99151
Jam2	1709.43	1.48621	0.0565419	26.2851	2.84027e-152	6.08389e-150	67374
Prss12	37.3591	1.48546	0.432126	3.43757	0.000586962	0.00215718	19142
Slc25a15	168.331	1.48509	0.12893	11.5186	1.06304e-30	2.46267e-29	18408
Stat3	1095.53	1.48332	0.0620942	23.8882	4.05918e-126	6.33209e-124	20848
Nptx2	307.496	1.48151	0.108562	13.6467	2.11323e-42	7.08599e-41	53324
Mro	472.693	1.48038	0.120474	12.288	1.05119e-34	2.81197e-33	71263
Grb14	145.505	1.4794	0.162141	9.12414	7.23105e-20	1.0584e-18	50915
Ak4	171.931	1.47907	0.227851	6.4914	8.50418e-11	6.99414e-10	11639
Csmd2	2920.55	1.47896	0.0672161	22.0031	2.68887e-107	3.21578e-105	329942
Slc25a37	164.359	1.47879	0.236856	6.24344	4.28063e-10	3.33334e-09	67712
Gm7997	29.0164	1.47611	0.327874	4.50208	6.72923e-06	3.38265e-05	666237
Gm15635	25.9077	1.47245	0.486249	3.02819	0.00246027	0.00794969	NA
Gm42480	93.2575	1.47145	0.333891	4.40699	1.04818e-05	5.13059e-05	NA
Jak3	79.8606	1.47051	0.405211	3.62901	0.00028451	0.00110669	16453
Abcg1	530.353	1.47031	0.138406	10.6232	2.32493e-26	4.49377e-25	11307
Slc12a4	383.042	1.47031	0.0996665	14.7523	2.975e-49	1.19932e-47	20498
Gm28320	39.6384	1.47015	0.393475	3.73632	0.000186733	0.000752569	NA
Serpinb1a	18.0072	1.4696	0.455394	3.22711	0.00125049	0.0043073	66222
Nlgn3	1537.6	1.46949	0.0661667	22.2089	2.82003e-109	3.50404e-107	245537
4930523C07Rik	75.3181	1.4691	0.322898	4.54973	5.37147e-06	2.73558e-05	67647
Rest	685.47	1.46897	0.137278	10.7007	1.01044e-26	1.98376e-25	19712
Mctp1	70.905	1.46585	0.357407	4.10135	4.10738e-05	0.000185193	78771
Gm37880	103.646	1.46581	0.208836	7.01896	2.23531e-12	2.09536e-11	NA
4932443L11Rik	147.092	1.46503	0.182391	8.03233	9.56396e-16	1.13436e-14	78899
Ugdh	1073.82	1.46447	0.0658676	22.2336	1.62526e-109	2.02826e-107	22235
Cntnap1	37.6932	1.46201	0.35984	4.06295	4.84571e-05	0.000215973	53321
Gm49555	125.945	1.46082	0.218884	6.67395	2.49017e-11	2.13614e-10	NA
Cpq	144.826	1.46081	0.17884	8.16828	3.12807e-16	3.81901e-15	54381
Gm42583	631.359	1.46081	0.17229	8.47875	2.27617e-17	2.95891e-16	NA
Maff	58.0328	1.46016	0.214217	6.81626	9.34431e-12	8.31658e-11	17133
Bbs12	64.4634	1.45986	0.236151	6.18188	6.33408e-10	4.85078e-09	241950
Gm11650	54.5512	1.45955	0.343783	4.24556	2.18049e-05	0.000102216	108167931
Slc2a9	37.477	1.45837	0.306712	4.75484	1.98604e-06	1.06572e-05	117591
Il15ra	17.738	1.45806	0.473022	3.08243	0.00205315	0.00674582	16169
Alg6	45.5132	1.45802	0.386496	3.77242	0.00016167	0.000658775	320438
Slc7a8	385.79	1.45677	0.164551	8.85299	8.52042e-19	1.17703e-17	50934
Eda2r	28.62	1.45515	0.492978	2.95175	0.00315978	0.00994501	245527
Uggt2	1282.76	1.45198	0.0754259	19.2504	1.39943e-82	1.18141e-80	66435
Lyn	316.144	1.45172	0.168401	8.62061	6.65982e-18	8.85395e-17	17096
Gab1	1590.52	1.45124	0.101409	14.3107	1.87677e-46	7.01419e-45	14388
Pcdh7	1592.73	1.44859	0.119462	12.126	7.69172e-34	1.99978e-32	54216
Col12a1	279.574	1.44815	0.212161	6.8257	8.74963e-12	7.79939e-11	12816
Airn	113.099	1.44777	0.193945	7.46486	8.33912e-14	8.6038e-13	104103
Tmem196	136.888	1.44708	0.211023	6.85746	7.00953e-12	6.28536e-11	217951
Ghr	172.673	1.44689	0.209979	6.89063	5.55456e-12	5.03577e-11	14600
Bhlhe41	101.509	1.4441	0.305372	4.72898	2.2565e-06	1.2041e-05	79362
Hey2	115.279	1.4436	0.452417	3.19086	0.00141851	0.00483156	15214
Smoc1	1451.9	1.44289	0.0836812	17.2427	1.26886e-66	7.83228e-65	64075
Glce	828.517	1.44286	0.108264	13.3272	1.60867e-40	5.11338e-39	93683
Tgfa	1828.88	1.44097	0.108113	13.3284	1.58337e-40	5.03851e-39	21802
Me1	545.293	1.44093	0.114599	12.5737	2.94784e-36	8.29527e-35	17436
AI506816	678.833	1.44072	0.131371	10.9668	5.52153e-28	1.14678e-26	433855
Gm48601	49.427	1.43997	0.440397	3.26971	0.00107657	0.00376061	NA
Suclg2	325.845	1.43992	0.155478	9.26121	2.02127e-20	3.03275e-19	20917
Card19	84.7213	1.43927	0.216991	6.63286	3.29244e-11	2.79429e-10	68480
Tirap	89.8023	1.43905	0.258284	5.57158	2.52433e-08	1.67567e-07	117149
Tm7sf3	637.058	1.43886	0.113266	12.7034	5.66221e-37	1.62685e-35	67623
Uap1l1	53.0306	1.43883	0.439272	3.27549	0.0010548	0.00369173	227620
Gm37345	20.8763	1.43853	0.411295	3.49756	0.000469531	0.00175367	NA
Traf4	1595.02	1.43746	0.0700164	20.5303	1.1536e-93	1.18257e-91	22032
Gm43826	14.4975	1.43651	0.432522	3.32125	0.000896161	0.00317915	NA
Arxes2	160.572	1.43648	0.194658	7.3795	1.58883e-13	1.61602e-12	76976
Hebp2	27.9508	1.43605	0.424055	3.38648	0.000707961	0.00256282	56016
1700095J03Rik	38.8164	1.43467	0.415791	3.45046	0.000559642	0.00206232	74293
Ak5	254.569	1.43458	0.11459	12.5192	5.86118e-36	1.63333e-34	229949
Gm49130	18.2763	1.43291	0.448773	3.19294	0.00140831	0.00479966	NA
Gm7946	18.0633	1.43141	0.449491	3.18451	0.00144998	0.00492881	666141
Brinp1	1461.45	1.42913	0.0766801	18.6376	1.59222e-77	1.20903e-75	56710
Piezo1	320.138	1.42875	0.177538	8.04755	8.44649e-16	1.00472e-14	234839
Rfx4	954.727	1.42836	0.103126	13.8506	1.26108e-43	4.37159e-42	71137
A230050P20Rik	156.757	1.42767	0.172842	8.25994	1.45744e-16	1.81646e-15	319278
Hecw2	448.162	1.42689	0.147605	9.66694	4.16654e-22	6.75662e-21	329152
Me3	248.472	1.4267	0.130477	10.9345	7.88407e-28	1.62803e-26	109264
Syne1	6244.22	1.42618	0.08996	15.8535	1.32873e-56	6.49721e-55	64009
Klhl21	73.8978	1.42426	0.301255	4.72776	2.27007e-06	1.21089e-05	242785
Hrasls	47.5889	1.42265	0.431263	3.2988	0.000970983	0.00341965	NA
Slc24a3	565.444	1.4221	0.121579	11.6969	1.32191e-31	3.1778e-30	94249
Marc2	478.104	1.42207	0.0909731	15.6317	4.42737e-55	2.10395e-53	67247
Gm44913	26.6968	1.42205	0.421948	3.37021	0.000751114	0.00270403	NA
Eno1b	16.08	1.42042	0.340809	4.16779	3.07569e-05	0.00014116	433182
Gpr4	67.469	1.41995	0.427053	3.325	0.000884197	0.00313826	319197
Atp13a4	83.8371	1.41718	0.420489	3.37032	0.000750811	0.00270328	224079
Mcf2	38.746	1.4158	0.320284	4.42046	9.84928e-06	4.83999e-05	109904
Gm37629	16.336	1.41542	0.43234	3.27386	0.00106087	0.00370982	NA
Gm28085	55.9759	1.41525	0.292669	4.83569	1.32688e-06	7.26959e-06	NA
[truncated: 7,125 more rows]

## Sheet: TRANSCRIPTION FACTORS DIFFEREN 
	baseMean	log2FoldChange	lfcSE	stat	pvalue	padj	entrez
Irx2	45.3065	8.90883	0.618983	14.3927	5.75166e-47	2.2012e-45	16372
Eomes	62.2611	-9.0051	0.704259	-12.7866	1.94723e-37	5.68003e-36	13813
Irx1	191.373	8.57693	0.43724	19.6161	1.12733e-85	9.98696e-84	16371
Foxl2	24.6912	8.03586	0.708518	11.3418	8.1468e-30	1.82543e-28	26927
Tfap2c	41.5905	-6.68855	0.615428	-10.8681	1.63532e-27	3.31722e-26	21420
Sp8	736.5	-6.2956	0.29771	-21.1467	2.95715e-99	3.20299e-97	320145
Dlx1	4374.81	-5.34431	0.104196	-51.2911	0	0	13390
Foxf2	161.372	7.88456	0.439633	17.9344	6.35205e-72	4.39332e-70	14238
Barhl2	4.73247	-5.26684	1.05376	-4.99816	5.78811e-07	3.31081e-06	104382
Rbpjl	61.9701	7.19538	0.496226	14.5002	1.20783e-47	4.6786e-46	19668
Zfp488	820.75	6.82632	0.71811	9.50596	1.98215e-21	3.10047e-20	382867
Sox17	67.646	6.70817	0.474169	14.1472	1.94304e-45	7.0507e-44	20671
Lhx9	3.18519	-5.20361	1.58631	-3.28033	0.00103685	0.00363378	16876
Nhlh2	4.47478	-5.18569	1.34512	-3.85519	0.00011564	0.000483499	18072
Pax7	2.96762	-5.09099	1.59365	-3.19455	0.0014005	0.00477473	18509
Dlx2	1792.28	-5.01216	0.16258	-30.8289	1.07319e-208	4.73905e-206	13392
Foxq1	35.9008	6.61476	0.685082	9.65543	4.66201e-22	7.54731e-21	15220
Tead4	9.76532	6.19755	0.872869	7.10021	1.24571e-12	1.18947e-11	21679
Tfap2d	25.0392	-4.69085	0.634342	-7.39484	1.41579e-13	1.44515e-12	226896
Ifi204	6.85819	6.1902	0.999197	6.19517	5.82218e-10	4.47307e-09	15951
Tbx5	5.01603	-4.58767	1.23297	-3.72082	0.00019858	0.000795732	21388
Sox10	3154.62	6.04128	0.309553	19.5162	8.00408e-85	6.96185e-83	20665
Zfp366	569.638	5.99384	0.646097	9.27699	1.74339e-20	2.6213e-19	238803
Neurog2	27.5201	-4.47898	1.00569	-4.45365	8.44236e-06	4.19459e-05	11924
Arx	1845.3	-4.22515	0.119005	-35.5041	4.2513e-276	3.58897e-273	11878
Scrt2	646.844	-4.02696	0.134606	-29.9166	1.19806e-196	4.2985e-194	545474
Zfp831	5.61532	5.90039	1.16859	5.04917	4.43743e-07	2.56996e-06	100043757
Insm1	528.908	-3.88992	0.160061	-24.3027	1.83514e-130	3.09847e-128	53626
Dlx5	940.017	-3.88581	0.143528	-27.0735	2.02107e-161	4.79428e-159	13395
Sp9	2427.46	-3.87548	0.0877073	-44.1865	0	0	381373
Nkx2-3	11.4479	-3.67365	0.757914	-4.84705	1.2531e-06	6.88115e-06	18089
Lhx6	626.787	-3.6383	0.162139	-22.4395	1.62202e-111	2.06919e-109	16874
Tbx1	37.3891	5.77581	0.677405	8.52639	1.50991e-17	1.97264e-16	21380
Pax6	1283.53	-3.54347	0.110291	-32.1283	1.77518e-226	8.78499e-224	18508
Dlx6	563.294	-3.38735	0.17039	-19.88	6.06916e-88	5.61945e-86	13396
Lhx8	23.1715	-3.30096	0.576667	-5.7242	1.03925e-08	7.18611e-08	16875
St18	869.961	-3.21428	0.134422	-23.9118	2.30699e-126	3.65842e-124	240690
Npas1	481.383	5.61751	0.284195	19.7664	5.80083e-87	5.2524e-85	18142
Tbr1	228.011	-2.94988	0.417338	-7.06831	1.5683e-12	1.4881e-11	21375
Barx2	22.5253	5.57766	0.659396	8.45875	2.70267e-17	3.50224e-16	12023
Neurod1	18.4345	-2.87784	0.73411	-3.92017	8.84861e-05	0.000377056	18012
Neurod4	18.6857	-2.83447	0.639122	-4.43495	9.20949e-06	4.55209e-05	11923
Bcl3	4.48827	5.57324	1.57334	3.54231	0.000396645	0.00150276	12051
Sp100	11.8426	5.48373	0.751885	7.29331	3.02425e-13	3.02668e-12	20684
Bcl11a	4776.82	-2.83382	0.100564	-28.1794	1.04665e-174	2.86115e-172	14025
Fezf2	39.7083	-2.80625	0.489	-5.73875	9.53806e-09	6.61762e-08	54713
Hmga2	63.3514	5.37324	0.430498	12.4814	9.42616e-36	2.61157e-34	15364
Sox11	10187.4	-2.73582	0.0544767	-50.2201	0	0	20666
Id4	1336.47	-2.73036	0.0880425	-31.0118	3.73587e-211	1.67548e-208	15904
Meox1	53.8284	5.11889	0.936826	5.46408	4.65325e-08	2.99333e-07	17285
Dmrta2	32.9141	-2.66986	0.536007	-4.98101	6.32524e-07	3.59939e-06	242620
Tbx4	26.7164	5.04282	0.722269	6.98192	2.91183e-12	2.7048e-11	21387
Plagl1	807.316	-2.47373	0.133415	-18.5416	9.53179e-77	7.14337e-75	22634
Sox1	2291.31	-2.42303	0.0788569	-30.727	2.48531e-207	1.04906e-204	20664
Prdm8	49.9653	-2.41715	0.33273	-7.26459	3.74175e-13	3.72011e-12	77630
Neurod2	99.8641	-2.37328	0.357782	-6.6333	3.28268e-11	2.78683e-10	18013
Zfhx4	811.678	-2.28978	0.133894	-17.1015	1.44732e-65	8.76421e-64	80892
Prdm16	873.671	-2.24278	0.123034	-18.229	3.04024e-74	2.18707e-72	70673
Mlxipl	56.028	-2.23813	0.357493	-6.26064	3.83402e-10	2.99776e-09	58805
Isl1	138.032	-2.23709	0.279139	-8.01426	1.10799e-15	1.30714e-14	16392
Meis2	9943.9	-2.21989	0.0731561	-30.3445	2.96614e-202	1.16626e-199	17536
Vax1	128.909	-2.15679	0.194408	-11.0941	1.3393e-28	2.85602e-27	22326
Pbx3	2134.15	-2.10344	0.0882536	-23.8341	1.48196e-125	2.28692e-123	18516
Foxp2	1921.39	-2.07215	0.127065	-16.3077	8.69694e-60	4.59721e-58	114142
Scrt1	511.818	-2.06732	0.111821	-18.4877	2.59181e-76	1.92727e-74	170729
Bcl11b	5459.74	-2.06101	0.144905	-14.2232	6.57944e-46	2.43677e-44	58208
Arid3b	208.519	-2.04985	0.123934	-16.5399	1.89414e-61	1.04754e-59	56380
Maf	423.021	-2.03605	0.153147	-13.2948	2.4824e-40	7.8645e-39	17132
Sox18	83.0344	5.01809	0.571193	8.78528	1.55978e-18	2.12787e-17	20672
Myrf	715.206	4.94724	0.308912	16.015	1.00344e-57	5.04406e-56	225908
Neurod6	109.538	-1.98133	0.320338	-6.18514	6.20492e-10	4.75567e-09	11922
En1	11.9987	4.90415	0.762339	6.43304	1.2508e-10	1.01618e-09	13798
Nkx2-2	421.384	4.89554	0.26099	18.7576	1.67888e-78	1.29889e-76	18088
Foxp4	1170.44	-1.97696	0.107031	-18.4709	3.5414e-76	2.62658e-74	74123
Carhsp1	1201.44	-1.95588	0.0745975	-26.2191	1.60841e-151	3.36979e-149	52502
Ybx2	34.8293	-1.91391	0.326459	-5.86264	4.55562e-09	3.24145e-08	53422
Foxb1	2.65982	4.82324	1.21866	3.9578	7.56418e-05	0.000326783	64290
Mecom	171.688	4.61728	0.727569	6.34618	2.20733e-10	1.7565e-09	14013
T	4.51238	4.54295	1.21887	3.72717	0.000193646	0.000778005	20997
Casz1	168.529	-1.89973	0.289125	-6.57061	5.01109e-11	4.19095e-10	69743
Onecut3	3.74685	4.5325	1.18983	3.80937	0.000139321	0.000574395	246086
Runx1t1	1720	-1.8778	0.115635	-16.2391	2.66837e-59	1.3825e-57	12395
Tbx3	84.5425	4.43116	0.512942	8.63872	5.68487e-18	7.57886e-17	21386
Cited2	540.545	-1.83852	0.129912	-14.1521	1.81292e-45	6.59523e-44	17684
Foxo6	351.845	-1.80773	0.115904	-15.5969	7.64361e-55	3.61441e-53	329934
Sox7	137.889	4.42068	0.515707	8.57207	1.01646e-17	1.33893e-16	20680
Gata2	51.6715	4.38266	0.904306	4.84643	1.25701e-06	6.89996e-06	14461
Zfp82	35.8044	-1.77085	0.52981	-3.34243	0.000830488	0.00296044	330502
Zfhx3	2511.6	-1.75648	0.0868021	-20.2355	4.77133e-91	4.67411e-89	11906
Taf7l	15.1493	-1.75358	0.504729	-3.4743	0.000512191	0.00190111	74469
Gli1	198.394	-1.74563	0.167644	-10.4127	2.17067e-25	4.00931e-24	14632
Rfx2	138.791	-1.73343	0.239969	-7.22356	5.06423e-13	4.98828e-12	19725
Notch2	2045.61	-1.71525	0.109832	-15.6171	5.56749e-55	2.63702e-53	18129
Pou3f4	1180.96	-1.71343	0.0695497	-24.636	5.19686e-134	9.15126e-132	18994
Dmrta1	169.857	4.33991	0.257992	16.8219	1.68708e-63	9.68484e-62	242523
Tle1	1476.95	-1.69403	0.090334	-18.7529	1.83219e-78	1.41369e-76	21885
Pbx1	5246.71	-1.68613	0.0421589	-39.9946	0	0	18514
Gata3	3.57729	4.20726	1.05687	3.98087	6.86643e-05	0.000299115	14462
Myt1l	3999.61	-1.68452	0.129693	-12.9885	1.42128e-38	4.27619e-37	17933
Zbtb20	20216.6	-1.68285	0.0440616	-38.1932	0	0	56490
Mycn	679.048	-1.68208	0.087612	-19.1992	3.75585e-82	3.09782e-80	18109
Meox2	2.40636	4.15082	1.00726	4.1209	3.77398e-05	0.000171129	17286
Erg	224.977	4.03885	0.25836	15.6326	4.36392e-55	2.07724e-53	13876
Foxs1	10.1179	3.85083	0.738015	5.21782	1.81041e-07	1.09238e-06	14239
Prox1	787.71	-1.62541	0.091478	-17.7683	1.24452e-70	8.40506e-69	19130
Olig1	3755.83	3.83414	0.132273	28.9866	9.72104e-185	3.00025e-182	50914
Actl6b	387.572	-1.61988	0.15772	-10.2706	9.5609e-25	1.72162e-23	83766
Irx3	8.07593	3.81734	0.652017	5.85466	4.77974e-09	3.39838e-08	16373
Dmrtb1	132.396	3.77261	0.292761	12.8863	5.3752e-38	1.5988e-36	56296
Foxd1	5.77722	3.67989	0.984826	3.73659	0.000186535	0.000751878	15229
Egr2	6.82589	3.59065	1.11646	3.21611	0.00129941	0.00445975	13654
Akna	1232.01	-1.60179	0.104167	-15.3772	2.32965e-53	1.04809e-51	100182
Hic1	63.4318	3.3316	0.423985	7.85782	3.90874e-15	4.42051e-14	15248
Rbfox2	4555.19	-1.5977	0.0784521	-20.3653	3.39888e-92	3.38743e-90	93686
Foxg1	2130.98	-1.57337	0.0521448	-30.1731	5.34502e-200	1.99244e-197	15228
Egr4	17.6187	3.15736	0.656091	4.81238	1.49143e-06	8.12769e-06	13656
Lef1	186.263	3.11552	0.429861	7.24773	4.23827e-13	4.19486e-12	16842
Foxf1	10.4286	3.07459	0.663549	4.63356	3.59432e-06	1.8683e-05	15227
Klf5	202.402	-1.55843	0.19724	-7.90117	2.76307e-15	3.16348e-14	12224
Rarb	336.098	-1.55481	0.212639	-7.312	2.63199e-13	2.64424e-12	218772
Gli3	927.151	-1.55361	0.137733	-11.2799	1.65e-29	3.63747e-28	14634
Bcor	1487.05	-1.54294	0.0696382	-22.1565	9.03741e-109	1.11331e-106	71458
Olig2	4770.01	3.05474	0.0688191	44.388	0	0	50913
Tcf7	224.074	3.03196	0.226071	13.4116	5.17343e-41	1.6741e-39	21414
Foxc1	135.996	3.02837	0.33322	9.08821	1.00687e-19	1.46255e-18	17300
Zbtb12	195.326	-1.54212	0.184929	-8.33896	7.49493e-17	9.46445e-16	193736
Gli2	455.9	-1.53054	0.0958623	-15.966	2.20308e-57	1.09214e-55	14633
Zfp385b	118.781	-1.49721	0.287399	-5.20953	1.89321e-07	1.14065e-06	241494
Hivep3	910.774	-1.4876	0.0958536	-15.5195	2.56207e-54	1.18803e-52	16656
Epas1	2063.38	2.98163	0.204723	14.5642	4.74212e-48	1.84936e-46	13819
E2f1	204.591	-1.48185	0.152263	-9.73215	2.19885e-22	3.61269e-21	13555
Klf2	176.487	2.92832	0.264769	11.0599	1.96272e-28	4.15763e-27	16598
Etv4	588.239	2.8532	0.151877	18.7862	9.79017e-79	7.61537e-77	18612
Sox4	3044.1	-1.47369	0.0558549	-26.3843	2.07562e-153	4.54782e-151	20677
Zfp457	11.3656	2.83703	0.822645	3.44867	0.000563348	0.00207491	431706
Esrrg	164.558	-1.45618	0.146878	-9.9142	3.61142e-23	6.09039e-22	26381
Nfatc4	94.3396	-1.45358	0.267356	-5.43688	5.42217e-08	3.46852e-07	73181
Zfp558	245.773	-1.44562	0.14993	-9.64195	5.31688e-22	8.57844e-21	72230
Pou3f2	2558.25	-1.43676	0.0714919	-20.0969	7.86263e-90	7.57319e-88	18992
Glis1	40.0224	2.82563	0.267363	10.5685	4.17199e-26	7.96201e-25	230587
Dbx2	140.396	2.78552	0.276669	10.068	7.64825e-24	1.32565e-22	223843
Zfp57	1993.61	-1.40071	0.0686675	-20.3985	1.72443e-92	1.73064e-90	22715
Nfib	10850.7	-1.3841	0.0401751	-34.4516	4.26211e-260	2.91274e-257	18028
Ikzf1	151.129	-1.37195	0.33005	-4.15681	3.22722e-05	0.000147808	22778
Setbp1	4882.67	-1.34942	0.045618	-29.5809	2.62909e-192	9.09192e-190	240427
Nr4a1	858.303	2.7463	0.120127	22.8616	1.12002e-115	1.47467e-113	15370
Satb2	182.575	-1.34636	0.284787	-4.72761	2.27178e-06	1.21158e-05	212712
Prdm1	92.5331	2.7313	0.354788	7.6984	1.37779e-14	1.49628e-13	12142
Grhl2	94.0338	2.7258	0.315622	8.63629	5.80705e-18	7.73456e-17	252973
Otx1	180.385	-1.34256	0.179984	-7.45931	8.69742e-14	8.95737e-13	18423
Mef2c	1645.86	-1.32411	0.11231	-11.7897	4.41136e-32	1.08129e-30	17260
Zfp704	6938.64	-1.32316	0.0605227	-21.8622	5.95084e-106	7.00028e-104	170753
Zhx2	715.401	-1.29836	0.0728701	-17.8175	5.1677e-71	3.5149e-69	387609
Pou6f2	115.595	-1.29447	0.201022	-6.43947	1.19892e-10	9.74585e-10	218030
Fli1	206.69	2.72111	0.35848	7.5907	3.18179e-14	3.37498e-13	14247
Notch4	251.933	2.60605	0.173549	15.0162	5.75189e-51	2.42432e-49	18132
Zfp365	522.464	2.59181	0.108725	23.8381	1.34558e-125	2.08769e-123	216049
Dab2	646.909	2.59148	0.154906	16.7294	8.00957e-63	4.52557e-61	13132
Sertad1	23.4521	2.51185	0.413792	6.07031	1.27662e-09	9.54241e-09	55942
Hlx	35.6462	2.48328	0.782436	3.17378	0.00150466	0.00509176	15284
Tshz1	2644.17	-1.28641	0.0837063	-15.3682	2.67669e-53	1.19858e-51	110796
Zfhx2	2509.99	-1.281	0.0699101	-18.3236	5.36777e-75	3.90053e-73	239102
Tgif1	80.6415	-1.27904	0.251223	-5.09124	3.5573e-07	2.08038e-06	21815
Zfpm1	194.046	2.47821	0.175785	14.098	3.90835e-45	1.39703e-43	22761
Hdac9	613.414	-1.27641	0.0968686	-13.1767	1.19468e-39	3.70713e-38	79221
Csrnp3	2035.73	-1.26568	0.124831	-10.1391	3.70355e-24	6.53368e-23	77771
Snai2	34.8597	2.47459	0.555176	4.45731	8.2994e-06	4.12713e-05	20583
Kcnip3	2532.78	2.42191	0.103659	23.3642	9.88357e-121	1.41138e-118	56461
Pou2f1	2148.57	-1.26202	0.0509525	-24.7685	1.96085e-135	3.51763e-133	18986
Ccnd1	907.032	2.38938	0.144871	16.4931	4.11134e-61	2.24349e-59	12443
Sox8	3478.14	2.34847	0.0846496	27.7434	2.09495e-169	5.51663e-167	20681
Foxp3	37.559	-1.25839	0.282447	-4.4553	8.37756e-06	4.16383e-05	20371
Sox3	281.225	2.30542	0.127001	18.1528	1.21997e-73	8.6675e-72	20675
Tead2	501.191	-1.25186	0.160142	-7.81715	5.40347e-15	6.05134e-14	21677
Six4	46.7189	2.28622	0.429141	5.32743	9.96133e-08	6.18875e-07	20474
Aff3	1334.13	-1.24592	0.0523941	-23.7797	5.41548e-125	8.26811e-123	16764
Camta1	2760.36	-1.2426	0.0726989	-17.0925	1.68903e-65	1.02064e-63	100072
Foxp1	4216.56	-1.23943	0.153249	-8.08767	6.0816e-16	7.31129e-15	108655
Tead1	2621.12	-1.23206	0.0524349	-23.4969	4.38882e-122	6.42716e-120	21676
Aebp1	170.894	2.23195	0.211268	10.5646	4.3502e-26	8.28009e-25	11568
Sall1	1705.14	-1.2311	0.0900404	-13.6728	1.47664e-42	4.98049e-41	58198
Bcl6b	146.365	2.22543	0.218311	10.1938	2.11288e-24	3.76449e-23	12029
Mllt11	1305.79	-1.19842	0.0907939	-13.1993	8.8514e-40	2.75555e-38	56772
Nfix	5981.45	-1.19198	0.0539195	-22.1067	2.72687e-108	3.30251e-106	18032
Klf7	1294.42	-1.18315	0.0706917	-16.7367	7.07708e-63	4.00657e-61	93691
Gsx2	123.477	-1.1495	0.182389	-6.30245	2.92984e-10	2.30968e-09	14843
Nr6a1	86.3496	-1.14903	0.308722	-3.72189	0.000197737	0.0007928	14536
Cbfa2t2	803.432	-1.14287	0.0645541	-17.704	3.90386e-70	2.61805e-68	12396
Kat6b	3947.42	-1.13081	0.0529131	-21.3711	2.47978e-101	2.78036e-99	54169
Zfp90	96.3477	-1.12541	0.153702	-7.32203	2.4424e-13	2.4598e-12	22751
Klf4	119.819	2.15642	0.337105	6.3969	1.58561e-10	1.27627e-09	16600
Foxj1	188.589	-1.12151	0.258225	-4.34315	1.40454e-05	6.74382e-05	15223
Mllt3	1312.46	-1.11136	0.0739646	-15.0255	4.99796e-51	2.10965e-49	70122
Rcor2	762.4	-1.08933	0.0931396	-11.6957	1.34049e-31	3.21706e-30	104383
Nfil3	233.515	-1.07193	0.185951	-5.76457	8.18656e-09	5.71586e-08	18030
Zic1	266.011	-1.05909	0.217277	-4.87438	1.09149e-06	6.03528e-06	22771
Zscan2	346.162	-1.03631	0.071949	-14.4034	4.92921e-47	1.89149e-45	22691
Id3	163.076	2.12974	0.273075	7.79911	6.23465e-15	6.95234e-14	15903
Cbfa2t3	248.869	-1.01275	0.138177	-7.32936	2.31252e-13	2.32981e-12	12398
Six5	65.4008	-0.99814	0.238281	-4.18892	2.80289e-05	0.000129447	20475
Tcf20	5250.08	-0.99703	0.0621203	-16.05	5.71943e-58	2.88515e-56	21411
Mafb	334.261	-0.992754	0.110468	-8.98678	2.54587e-19	3.61932e-18	16658
Zic3	241.456	2.12395	0.267511	7.93965	2.02745e-15	2.35032e-14	22773
Mapk8	1314.06	-0.989377	0.070266	-14.0805	5.00837e-45	1.78356e-43	26419
Atf5	126.221	-0.987549	0.177564	-5.56164	2.6725e-08	1.77034e-07	107503
Ets1	925.183	2.09406	0.208099	10.0628	8.06685e-24	1.39652e-22	23871
Tox3	1455.18	-0.985426	0.0922234	-10.6852	1.19372e-26	2.33402e-25	244579
Plag1	103.608	-0.982293	0.165604	-5.93159	3.00021e-09	2.17024e-08	56711
Npas3	1221.9	2.03854	0.0957979	21.2796	1.75325e-100	1.92075e-98	27386
Heyl	120.243	2.03602	0.319443	6.37364	1.84595e-10	1.47753e-09	56198
Nlk	1588.3	-0.96225	0.0548955	-17.5288	8.6405e-69	5.62377e-67	18099
Mxd3	197.236	-0.947555	0.180338	-5.25431	1.48577e-07	9.05881e-07	17121
Tfeb	96.6123	2.01055	0.237863	8.45252	2.85079e-17	3.68587e-16	21425
Plek	165.195	-0.937709	0.279935	-3.34974	0.000808882	0.00289132	56193
Trib1	323.796	1.98255	0.120666	16.4301	1.16459e-60	6.24809e-59	211770
Mxi1	1516.74	-0.937173	0.0669854	-13.9907	1.77636e-44	6.29466e-43	17859
Lmo1	72.6507	1.95116	0.291445	6.69478	2.15996e-11	1.8657e-10	109594
Zeb2	6999.11	-0.935461	0.0490391	-19.0758	4.01076e-81	3.252e-79	24136
Tfap4	182.61	-0.9312	0.123963	-7.51195	5.82551e-14	6.08256e-13	83383
Hat1	509.844	-0.927958	0.106383	-8.72283	2.71326e-18	3.66488e-17	107435
Lhx2	469.694	-0.920408	0.111293	-8.27011	1.33839e-16	1.67389e-15	16870
Zfp7	153.18	-0.915009	0.163667	-5.59068	2.26187e-08	1.50737e-07	223669
Stat6	103.565	1.94021	0.314764	6.16401	7.09235e-10	5.40408e-09	20852
Sp4	966.038	-0.912825	0.0846361	-10.7853	4.03966e-27	8.04093e-26	20688
Sox6	4693.38	1.91233	0.0695355	27.5015	1.68507e-166	4.24267e-164	20679
Chaf1b	259.614	-0.907686	0.122813	-7.39078	1.45967e-13	1.4894e-12	110749
Smad9	32.601	1.86464	0.378204	4.93024	8.21283e-07	4.60918e-06	55994
Cdkn1c	107.513	1.86134	0.208368	8.93293	4.14874e-19	5.81735e-18	12577
Zic5	71.9115	-0.902901	0.238362	-3.78794	0.0001519	0.000621889	65100
Zbtb18	1888	-0.89917	0.0682898	-13.167	1.35928e-39	4.19521e-38	30928
Nfkbil1	75.2354	-0.891851	0.287107	-3.10634	0.00189418	0.00626801	18038
Zfp775	103.76	-0.88411	0.149024	-5.93267	2.98046e-09	2.15649e-08	243372
Id1	80.661	1.84753	0.247224	7.4731	7.83263e-14	8.10162e-13	15901
Pcbd2	9.51835	1.84069	0.535572	3.43687	0.000588482	0.00216194	72562
Arid1b	3941.71	-0.882083	0.0346108	-25.4858	2.83205e-143	5.41921e-141	239985
Hif3a	75.9717	-0.879279	0.283978	-3.0963	0.00195954	0.00645824	53417
Zbtb16	257.534	-0.876055	0.113208	-7.73843	1.00655e-14	1.10736e-13	235320
Hes1	161.88	1.82759	0.271022	6.74334	1.54786e-11	1.35082e-10	15205
E2f7	576.104	-0.85666	0.124854	-6.86127	6.8252e-12	6.12582e-11	52679
Ppard	497.995	1.82555	0.13992	13.0471	6.60326e-39	1.9993e-37	19015
Nfya	405.379	-0.852902	0.0770751	-11.0658	1.83725e-28	3.90048e-27	18044
Cdca7l	298.599	-0.851326	0.191027	-4.45657	8.32796e-06	4.13989e-05	217946
Tet3	4068.9	-0.829231	0.0352294	-23.5381	1.66371e-122	2.46151e-120	194388
Nab2	316.016	1.82156	0.157691	11.5515	7.2557e-31	1.68632e-29	17937
Pknox1	568.289	-0.825193	0.0868758	-9.49853	2.12869e-21	3.32607e-20	18771
Zfp536	706.063	-0.816901	0.0861223	-9.48537	2.41529e-21	3.76159e-20	243937
Zfp773	127.403	-0.816365	0.213642	-3.82118	0.000132816	0.000549311	76373
Sp3	1689.85	-0.815255	0.0727991	-11.1987	4.13715e-29	8.98929e-28	20687
Kdm5b	3077.62	-0.810385	0.0553079	-14.6522	1.3036e-48	5.13971e-47	75605
Rarg	170.71	1.81974	0.260316	6.99051	2.73893e-12	2.55328e-11	19411
Zfp786	189.96	-0.805736	0.159399	-5.05483	4.30784e-07	2.49794e-06	330301
Zfp853	135.168	1.81579	0.297475	6.10399	1.03455e-09	7.79592e-09	330230
Eya1	453.146	1.81182	0.140897	12.8591	7.64204e-38	2.25436e-36	14048
Hdac10	239.715	-0.805317	0.110506	-7.28751	3.15735e-13	3.15329e-12	170787
Nrg1	481.186	-0.803939	0.154377	-5.20764	1.91259e-07	1.15209e-06	211323
Zfp697	441.777	-0.797454	0.076135	-10.4742	1.13489e-25	2.12352e-24	242109
Tcf7l2	906.226	1.79174	0.120976	14.8107	1.24919e-49	5.0931e-48	21416
Ncoa1	3149.28	-0.793054	0.0738949	-10.7322	7.18664e-27	1.42163e-25	17977
Hes6	334.205	-0.792751	0.12968	-6.11311	9.77059e-10	7.37625e-09	55927
Mnt	646.638	-0.787128	0.080621	-9.76331	1.61785e-22	2.67033e-21	17428
Sirt2	1735.6	1.7787	0.102179	17.4077	7.21727e-68	4.61375e-66	64383
Tshz3	260.901	1.77355	0.226492	7.8305	4.8595e-15	5.45919e-14	243931
Rfx3	2400.62	-0.785036	0.061221	-12.823	1.21928e-37	3.57112e-36	19726
Ezh2	2370.03	-0.776014	0.0403612	-19.2267	2.211e-82	1.85022e-80	14056
Tsg101	970.647	-0.775807	0.0705311	-10.9995	3.84192e-28	8.0375e-27	22088
Nfatc2	182.595	1.75448	0.234885	7.46954	8.04753e-14	8.31791e-13	18019
Stat1	77.4527	1.73342	0.18536	9.35164	8.62962e-21	1.31473e-19	20846
Cebpb	24.1437	1.72286	0.374457	4.60096	4.20549e-06	2.17027e-05	12608
Rps6ka5	571.331	-0.762561	0.0984885	-7.74263	9.73792e-15	1.07297e-13	73086
Mybl1	600.961	1.7152	0.138531	12.3814	3.29705e-35	8.97016e-34	17864
Fhl2	55.8475	1.69058	0.298059	5.67195	1.41183e-08	9.61189e-08	14200
Foxo1	515.245	-0.762217	0.119091	-6.40031	1.5506e-10	1.24984e-09	56458
Bhlhe40	348.013	1.6788	0.128343	13.0805	4.25387e-39	1.29479e-37	20893
Irf2bpl	1355.42	-0.760989	0.0701906	-10.8418	2.18236e-27	4.3958e-26	238330
Gsx1	185.895	1.67538	0.151508	11.058	2.00474e-28	4.24352e-27	14842
E2f2	220.58	-0.75238	0.1449	-5.19242	2.07575e-07	1.24567e-06	242705
Mkx	16.9632	1.63985	0.5147	3.18603	0.00144239	0.0049065	210719
Zfp36l1	1436.06	1.62912	0.0856489	19.0209	1.14396e-80	9.17178e-79	12192
Zfp113	504.5	-0.75168	0.119166	-6.30783	2.82973e-10	2.23628e-09	56314
Etv1	1756.68	-0.750458	0.068351	-10.9795	4.79694e-28	9.99177e-27	14009
Zfp618	952.747	-0.74673	0.0728903	-10.2446	1.25162e-24	2.24814e-23	72701
Tal1	37.787	1.61914	0.44642	3.62694	0.000286805	0.00111426	21349
Zfp553	529.732	-0.74624	0.11014	-6.77536	1.24099e-11	1.09197e-10	233887
Zfp575	93.7665	-0.745132	0.2464	-3.02407	0.00249398	0.00805136	101544
Dpf1	1003.97	-0.732711	0.0683976	-10.7125	8.89048e-27	1.74903e-25	29861
Trib2	2558.27	1.604	0.0464174	34.556	1.15724e-261	8.1015e-259	217410
Klf10	390.734	1.57096	0.0889974	17.6517	9.86963e-70	6.54245e-68	21847
Zfp960	37.3647	1.56307	0.353566	4.42087	9.83046e-06	4.8324e-05	449000
Prdm10	852.028	-0.722355	0.0945968	-7.63615	2.23815e-14	2.39708e-13	382066
Zbtb7c	126.598	1.55879	0.275881	5.65025	1.60215e-08	1.08485e-07	207259
Zfp69	87.4285	1.55684	0.191222	8.14156	3.90219e-16	4.74194e-15	381549
Zfp58	27.0482	1.5393	0.313344	4.9125	8.99223e-07	5.02246e-06	238693
Prrx1	514.996	1.52577	0.151151	10.0943	5.85196e-24	1.01985e-22	18933
Ets2	424.092	1.52237	0.158044	9.63256	5.82599e-22	9.38929e-21	23872
Zc3h6	226.318	-0.717019	0.120468	-5.95195	2.64963e-09	1.92635e-08	78751
Atf2	1214.74	-0.713628	0.068332	-10.4435	1.56847e-25	2.9158e-24	11909
Nr3c1	896.89	1.50924	0.074191	20.3427	5.39147e-92	5.35472e-90	14815
Kmt2e	5584.5	-0.705452	0.0458912	-15.3723	2.51182e-53	1.12828e-51	69188
Zfp846	978.37	-0.699559	0.089453	-7.82041	5.26522e-15	5.90342e-14	244721
Stat3	1095.53	1.48332	0.0620942	23.8882	4.05918e-126	6.33209e-124	20848
Kdm6b	3881.57	-0.699023	0.0778232	-8.98219	2.65423e-19	3.76963e-18	216850
Csrnp2	521.586	-0.692039	0.100645	-6.87603	6.15441e-12	5.54457e-11	207785
Nkx2-1	207.481	-0.684255	0.154729	-4.42227	9.76684e-06	4.80359e-05	21869
Zfp799	469.223	-0.676683	0.0827278	-8.17964	2.84688e-16	3.48907e-15	240064
Mllt6	1556.34	-0.672856	0.0674707	-9.97257	2.00959e-23	3.41713e-22	246198
Rest	685.47	1.46897	0.137278	10.7007	1.01044e-26	1.98376e-25	19712
Maff	58.0328	1.46016	0.214217	6.81626	9.34431e-12	8.31658e-11	17133
Tfdp2	910.393	-0.669188	0.0874795	-7.64965	2.01523e-14	2.16155e-13	211586
Cbx7	201.09	-0.660962	0.124147	-5.32403	1.01495e-07	6.29613e-07	52609
Bhlhe41	101.509	1.4441	0.305372	4.72898	2.2565e-06	1.2041e-05	79362
Hey2	115.279	1.4436	0.452417	3.19086	0.00141851	0.00483156	15214
Zfp821	1050.13	-0.660916	0.0812958	-8.12977	4.30115e-16	5.21131e-15	75871
Arid1a	8730.92	-0.659435	0.0440108	-14.9835	9.41336e-51	3.93866e-49	93760
Rfx4	954.727	1.42836	0.103126	13.8506	1.26108e-43	4.37159e-42	71137
Zfp668	402.908	-0.659308	0.0796555	-8.277	1.26319e-16	1.58121e-15	244219
Pcbd1	25.4448	1.40614	0.398618	3.52754	0.000419433	0.00158253	13180
Brd3	3591.26	-0.652045	0.0527692	-12.3565	4.49054e-35	1.21596e-33	67382
Creb3l2	653.977	1.3829	0.116915	11.8283	2.78848e-32	6.88792e-31	208647
Zfp658	318.321	-0.652003	0.114233	-5.70765	1.14548e-08	7.8808e-08	210104
Zc3h13	2914.3	-0.649683	0.0606505	-10.7119	8.94789e-27	1.75791e-25	67302
Zfp560	255.735	-0.648742	0.114019	-5.68978	1.27204e-08	8.69937e-08	434377
Zbtb41	1619.7	-0.646913	0.064736	-9.9931	1.63397e-23	2.78999e-22	226470
Zfp609	2983.25	-0.642924	0.0385402	-16.6819	1.77435e-62	9.94709e-61	214812
Mtf2	1027.02	-0.642639	0.0713422	-9.00784	2.10147e-19	3.00093e-18	17765
Smarcd1	1469.26	-0.640025	0.0584474	-10.9504	6.6125e-28	1.36743e-26	83797
Irf7	30.8732	1.34556	0.447952	3.00381	0.00266619	0.00854866	54123
Epc1	1781.27	-0.629158	0.0616149	-10.2111	1.76779e-24	3.15945e-23	13831
Lmcd1	218.682	1.32176	0.19204	6.88274	5.87108e-12	5.30263e-11	30937
Smad2	1085.15	-0.625845	0.0644656	-9.7082	2.78203e-22	4.54741e-21	17126
Hdac5	1075.07	-0.625054	0.0777886	-8.03529	9.3357e-16	1.10822e-14	15184
Zfp292	4013.2	-0.624034	0.0543639	-11.4788	1.68553e-30	3.87658e-29	30046
Epc2	1351.41	-0.623577	0.0683237	-9.12681	7.05475e-20	1.03312e-18	227867
Ehmt2	2318.52	-0.622274	0.0445637	-13.9637	2.5958e-44	9.15322e-43	110147
Mitf	90.6852	1.3077	0.219835	5.94855	2.70531e-09	1.96534e-08	17342
Zfp646	1340.32	-0.62123	0.0548121	-11.3338	8.9247e-30	1.99661e-28	233905
Flna	6470.91	-0.620185	0.0793177	-7.819	5.32451e-15	5.96757e-14	192176
Pbrm1	4351.58	-0.604244	0.0506897	-11.9204	9.26218e-33	2.31377e-31	66923
Zfp341	116.125	-0.604127	0.162312	-3.722	0.000197649	0.000792555	228807
Zfp39	282.146	-0.602851	0.139886	-4.30958	1.63562e-05	7.7882e-05	22698
Zfp941	133.369	1.30427	0.247785	5.2637	1.41183e-07	8.63313e-07	407812
Nfatc1	311.829	1.30248	0.147886	8.80735	1.28134e-18	1.75469e-17	18018
Pygo1	981.937	-0.598458	0.0754774	-7.92897	2.20963e-15	2.54711e-14	72135
Rreb1	444.257	1.29593	0.169577	7.64218	2.13576e-14	2.28827e-13	68750
Ube2b	563.488	-0.594133	0.106535	-5.57686	2.44901e-08	1.62944e-07	22210
Zfp68	1431.7	-0.590632	0.042706	-13.8302	1.67573e-43	5.78108e-42	24135
Rel	106.244	1.29055	0.309707	4.16699	3.08652e-05	0.000141612	19696
Zfp46	1490.67	-0.586985	0.0739756	-7.93484	2.10774e-15	2.43552e-14	22704
Aes	1279.8	-0.586701	0.066583	-8.81157	1.23407e-18	1.69157e-17	NA
Nr2e1	552.239	-0.584181	0.0915487	-6.38109	1.75832e-10	1.41015e-09	21907
Erf	430.324	1.28536	0.12464	10.3125	6.18628e-25	1.12383e-23	13875
Creb5	936.739	1.26052	0.112039	11.2507	2.29707e-29	5.02154e-28	231991
Nfkbiz	126.642	1.25333	0.249262	5.02815	4.95231e-07	2.85721e-06	80859
Grhl1	75.7891	1.25	0.200536	6.2333	4.56696e-10	3.54381e-09	195733
Hey1	369.262	1.2404	0.164971	7.51887	5.52501e-14	5.77931e-13	15213
Nfyb	911.265	-0.583555	0.0646902	-9.02076	1.86782e-19	2.67793e-18	18045
Zfp184	330.997	-0.575917	0.109466	-5.26117	1.43143e-07	8.74551e-07	193452
Etv5	1414.87	1.21788	0.0924533	13.173	1.25572e-39	3.88393e-38	104156
Mecp2	2257.64	-0.573522	0.0475468	-12.0623	1.67097e-33	4.30538e-32	17257
Pcgf6	313.506	-0.571308	0.128693	-4.43933	9.02405e-06	4.46659e-05	71041
Foxn2	479.469	1.20974	0.0946437	12.782	2.06563e-37	6.01928e-36	14236
Hes5	127.82	1.20441	0.239311	5.03281	4.83339e-07	2.7914e-06	15208
Lrrfip1	1251.11	1.17454	0.0846573	13.8741	9.09275e-44	3.16735e-42	16978
Tcf4	9048	-0.571266	0.0340085	-16.7978	2.53433e-63	1.45195e-61	21413
Tcf7l1	226.277	1.15431	0.201916	5.71679	1.08554e-08	7.48995e-08	21415
Jdp2	170.198	1.1543	0.149141	7.73967	9.96786e-15	1.09746e-13	81703
Phf19	155.315	1.14915	0.176748	6.50162	7.946e-11	6.55009e-10	74016
Med16	394.434	-0.570925	0.115927	-4.92486	8.44227e-07	4.72909e-06	216154
Arid2	3158.32	-0.569484	0.0452224	-12.593	2.30795e-36	6.52019e-35	77044
Nr4a3	239.373	1.14638	0.149419	7.67224	1.69023e-14	1.82386e-13	18124
Zfp493	61.9317	1.14078	0.233958	4.87599	1.08263e-06	5.9932e-06	72958
Zfp423	733.904	1.13783	0.120142	9.47067	2.78054e-21	4.31871e-20	94187
Zfp810	408.992	-0.565944	0.117712	-4.80786	1.52554e-06	8.3041e-06	235050
Six3	561.79	-0.564099	0.123973	-4.55019	5.35984e-06	2.73063e-05	20473
Pik3r1	4933.97	1.1352	0.0532244	21.3286	6.16359e-101	6.83064e-99	18708
Zfp512	1277.33	-0.563722	0.0554921	-10.1586	3.034e-24	5.37561e-23	269639
Zfpm2	701.393	1.13487	0.11767	9.64452	5.1852e-22	8.3754e-21	22762
Smarcc2	8072.72	-0.562659	0.0387089	-14.5357	7.20167e-48	2.80474e-46	68094
Creb1	2003.14	-0.560102	0.0511328	-10.9539	6.36672e-28	1.3185e-26	12912
Zfp444	429.994	-0.559073	0.094177	-5.9364	2.91346e-09	2.10908e-08	72667
Arntl2	57.6433	1.1151	0.299535	3.72277	0.000197051	0.000790574	272322
Mycl	709.159	-0.555099	0.109931	-5.04951	4.42955e-07	2.56592e-06	16918
Pou3f3	5855.46	-0.552626	0.0372044	-14.8538	6.57562e-50	2.69244e-48	18993
Khdrbs1	4220.01	-0.547837	0.0307319	-17.8263	4.41742e-71	3.01171e-69	20218
Mms19	654	-0.540657	0.0751598	-7.19343	6.31825e-13	6.17897e-12	72199
Rfx1	543.124	-0.536834	0.119023	-4.51035	6.47214e-06	3.25969e-05	19724
Bcl6	131.95	1.10873	0.168011	6.59914	4.13537e-11	3.48086e-10	12053
Eno1	3246.41	1.1014	0.0569864	19.3275	3.15378e-83	2.70218e-81	13806
Nfyc	700.785	-0.536771	0.0976474	-5.49704	3.86223e-08	2.51549e-07	18046
Relb	44.8081	1.08862	0.246377	4.41849	9.93934e-06	4.88091e-05	19698
Wwtr1	734.041	1.08722	0.154705	7.02769	2.09974e-12	1.9715e-11	97064
Prdm5	255.867	1.08684	0.148579	7.31488	2.57612e-13	2.58993e-12	70779
Pou6f1	1945.7	-0.535063	0.0506352	-10.567	4.23786e-26	8.07697e-25	19009
Zfp408	344.746	-0.534613	0.10267	-5.20712	1.91794e-07	1.15507e-06	381410
Prdm4	556.387	-0.532722	0.0924161	-5.76439	8.19525e-09	5.72054e-08	72843
Calcoco1	1235.36	-0.522687	0.0701982	-7.44588	9.63007e-14	9.88952e-13	67488
Zfp653	292.1	-0.51839	0.118959	-4.35773	1.31417e-05	6.33748e-05	319601
Ogt	4789.91	-0.515107	0.0379475	-13.5742	5.69428e-42	1.8917e-40	108155
Bmi1	1418	-0.512386	0.0697885	-7.34198	2.1046e-13	2.12705e-12	12151
Mybl2	410.683	-0.511102	0.163127	-3.13316	0.00172933	0.00576971	17865
Smarce1	3195.9	-0.509441	0.0504656	-10.0948	5.82434e-24	1.01565e-22	57376
Zfp28	447.08	-0.508986	0.0947396	-5.37247	7.76652e-08	4.89187e-07	22690
Med23	1001.72	-0.504343	0.0687745	-7.33329	2.24574e-13	2.26491e-12	70208
Nfkbie	73.9115	1.08127	0.23867	4.53043	5.88647e-06	2.98515e-05	18037
Tshz2	70.9034	1.04733	0.212457	4.9296	8.23983e-07	4.6211e-06	228911
Zkscan16	154.066	1.04723	0.205536	5.09514	3.48484e-07	2.04259e-06	100041581
Egr3	266.353	1.03964	0.17049	6.09795	1.07439e-09	8.08339e-09	13655
Ss18	1184.85	1.02755	0.0734811	13.9838	1.95668e-44	6.91656e-43	268996
Pcbp3	528.254	-0.503371	0.0737714	-6.82339	8.89177e-12	7.92364e-11	59093
Kdm5a	2234.65	-0.498457	0.0558549	-8.92415	4.49148e-19	6.28873e-18	214899
Foxj3	1697.63	-0.497977	0.0712453	-6.98962	2.75636e-12	2.56786e-11	230700
Zfp41	908.267	-0.49605	0.0637515	-7.78099	7.19575e-15	7.99302e-14	22701
Tbpl1	391.855	-0.495813	0.118055	-4.19984	2.67099e-05	0.000123774	237336
Ehmt1	3354.26	-0.495203	0.0489554	-10.1154	4.72203e-24	8.2897e-23	77683
Nr2f2	404.459	1.01342	0.214765	4.71872	2.37332e-06	1.26338e-05	11819
Arhgap35	9133.19	1.00374	0.0584922	17.1602	5.27055e-66	3.2256e-64	232906
Pgr	58.8567	1.00266	0.335146	2.99171	0.00277422	0.00886633	18667
Zbtb48	185.901	-0.494877	0.149437	-3.31162	0.000927583	0.0032817	100090
Rsl1	51.6337	0.992141	0.263024	3.77205	0.000161909	0.00065956	380855
Usp2	214.522	0.987941	0.132006	7.48403	7.20754e-14	7.46313e-13	53376
Zfp276	424.173	0.972637	0.102045	9.53144	1.55117e-21	2.43829e-20	57247
Wiz	1460.93	-0.494002	0.0542932	-9.09879	9.13444e-20	1.33089e-18	22404
Zfp661	146.785	0.968414	0.149563	6.47495	9.4846e-11	7.78486e-10	72180
Tle3	2687.66	-0.491109	0.051495	-9.53701	1.47007e-21	2.31715e-20	21887
Mbtd1	1717.03	-0.489832	0.0589991	-8.30236	1.0206e-16	1.28259e-15	103537
Gsk3b	4322.67	-0.487513	0.0419891	-11.6105	3.64648e-31	8.61439e-30	56637
Zfp13	358.238	-0.487264	0.117255	-4.15561	3.24424e-05	0.000148516	22654
Scaper	1762.7	-0.487185	0.107155	-4.54653	5.45368e-06	2.77646e-05	244891
Irf1	67.1717	0.968157	0.289617	3.34289	0.0008291	0.0029566	16362
Rbpj	1171.48	-0.484419	0.0805163	-6.0164	1.78336e-09	1.31758e-08	19664
Zscan20	222.628	-0.484059	0.144161	-3.35776	0.000785764	0.0028143	269585
Zbtb44	988.778	-0.483966	0.0769191	-6.29188	3.1364e-10	2.46776e-09	235132
Cbx1	1746.13	-0.483359	0.0680959	-7.09821	1.26386e-12	1.20641e-11	12412
Elf2	1337.5	-0.482615	0.0601427	-8.0245	1.01943e-15	1.20712e-14	69257
Myt1	5634.89	0.94277	0.0474028	19.8885	5.12134e-88	4.75721e-86	17932
Klf11	269.437	-0.482381	0.13751	-3.50798	0.000451522	0.00169059	194655
Sumo2	1274.87	-0.482266	0.0710116	-6.79137	1.11073e-11	9.81569e-11	170930
Tsc22d2	1264.19	-0.47905	0.0607951	-7.87974	3.28058e-15	3.73068e-14	72033
Cebpd	81.3321	0.940705	0.219403	4.28756	1.80647e-05	8.5464e-05	12609
Rxrg	703.121	-0.476073	0.144209	-3.30127	0.000962488	0.00339389	20183
Zfp647	263.096	-0.474892	0.149882	-3.16843	0.00153263	0.00517665	239546
Klf9	356.87	0.933095	0.109414	8.5281	1.48769e-17	1.94449e-16	16601
Phf20	1494.53	-0.473668	0.0558957	-8.47414	2.36813e-17	3.07428e-16	228829
Lcor	1871.35	-0.473539	0.0579754	-8.16793	3.13715e-16	3.82847e-15	212391
Id2	339.978	0.923428	0.0798684	11.5619	6.42916e-31	1.50029e-29	15902
Carm1	935.878	-0.472202	0.0957128	-4.93353	8.07564e-07	4.53728e-06	59035
Nr3c2	154.144	0.907955	0.173501	5.23314	1.66656e-07	1.01004e-06	110784
Ncoa5	1403.44	-0.471564	0.0543559	-8.6755	4.1175e-18	5.52265e-17	228869
Nfkb1	625.556	0.905085	0.103083	8.78014	1.63268e-18	2.22521e-17	18033
Elf1	416.425	0.904348	0.142399	6.35079	2.14216e-10	1.70559e-09	13709
Tcfl5	68.8255	0.887262	0.278923	3.18102	0.00146755	0.00498204	277353
Elk3	327.829	0.885146	0.135909	6.5128	7.37648e-11	6.10164e-10	13713
Zfp551	137.239	-0.469861	0.117934	-3.98411	6.77329e-05	0.000295461	619331
Cdc45	290.18	-0.468763	0.112545	-4.16511	3.11197e-05	0.000142734	12544
Baz1b	6208.61	-0.468523	0.0522125	-8.97339	2.87525e-19	4.0795e-18	22385
Cux1	4674.61	-0.468294	0.047883	-9.77997	1.37256e-22	2.27071e-21	13047
Zfp790	424.756	-0.468153	0.0766268	-6.10952	9.99336e-10	7.53453e-09	233056
Klf3	1222.17	0.882345	0.0832431	10.5996	2.9923e-26	5.74501e-25	16599
Arid5b	700.899	0.874991	0.0929979	9.40872	5.02224e-21	7.71699e-20	71371
Tet1	1475.98	-0.46762	0.0569848	-8.20606	2.28568e-16	2.82297e-15	52463
Zfp358	397.089	-0.464787	0.110869	-4.1922	2.76257e-05	0.000127708	140482
Eya4	125.763	0.873244	0.236716	3.689	0.000225139	0.000892812	14051
Kmt2a	9103.7	-0.464179	0.039077	-11.8786	1.52935e-32	3.80719e-31	214162
Smarcc1	6492.7	-0.462202	0.0455846	-10.1394	3.69201e-24	6.51733e-23	20588
Dpf3	274.342	0.866603	0.0943526	9.18473	4.12564e-20	6.10089e-19	70127
Lancl2	660.174	-0.460553	0.101747	-4.52645	5.99822e-06	3.03752e-05	71835
Maf1	370.122	-0.45581	0.11904	-3.82906	0.000128632	0.000533159	68877
Zfp518b	1259.53	-0.454262	0.0657106	-6.91307	4.74281e-12	4.33406e-11	100515
Zik1	481.892	-0.453091	0.0934757	-4.84716	1.25242e-06	6.87875e-06	22775
Sall3	2415.81	0.86449	0.0739502	11.6902	1.43109e-31	3.43163e-30	20689
Etv6	662.995	0.84203	0.100736	8.3588	6.33616e-17	8.04365e-16	14011
Anp32a	2937.69	-0.45247	0.0553084	-8.18085	2.8184e-16	3.45564e-15	11737
Yeats4	750.526	-0.448544	0.0921506	-4.86751	1.13011e-06	6.23846e-06	64050
Zfp36l2	1378.48	0.813934	0.109008	7.46677	8.21902e-14	8.48599e-13	12193
Sox5	2129.51	0.794813	0.0604912	13.1393	1.95966e-39	6.03522e-38	20678
Meis3	702.203	-0.44829	0.0883272	-5.07533	3.86821e-07	2.25486e-06	17537
Npas2	114.035	0.785823	0.192382	4.08471	4.41319e-05	0.000198048	18143
Zbtb5	528.73	-0.448118	0.0835512	-5.36339	8.16729e-08	5.12967e-07	230119
Notch3	872.822	0.782274	0.128764	6.07523	1.23807e-09	9.26635e-09	18131
Zfp521	1314.68	0.777999	0.0714203	10.8932	1.24141e-27	2.53429e-26	225207
Cebpg	478.554	-0.44691	0.0898135	-4.97598	6.49194e-07	3.6884e-06	12611
Zfp532	1772.36	-0.446089	0.0611332	-7.29701	2.9423e-13	2.94775e-12	328977
Ccar2	1963.81	-0.443287	0.0502928	-8.81411	1.20637e-18	1.65439e-17	219158
Ube2i	2167.64	-0.441318	0.04744	-9.30265	1.3699e-20	2.06949e-19	22196
Elk1	548.63	-0.439978	0.0732856	-6.00361	1.92975e-09	1.42025e-08	13712
Tub	2284.43	0.757766	0.0921599	8.2223	1.99644e-16	2.47213e-15	22141
Zbtb22	330.22	-0.439714	0.12412	-3.54265	0.000396122	0.00150097	81630
Jun	2517.43	-0.439674	0.112947	-3.89276	9.91122e-05	0.00041891	16476
Zbtb17	621.096	-0.438874	0.0874898	-5.01629	5.26783e-07	3.0295e-06	22642
Irf2	527.747	0.755513	0.122197	6.18276	6.29922e-10	4.82537e-09	16363
Suz12	1151.01	-0.438534	0.0519291	-8.44486	3.0441e-17	3.93226e-16	52615
Nfkbia	157.966	0.743817	0.157494	4.72282	2.32593e-06	1.2393e-05	18035
Zfp386	774.613	-0.438509	0.0664063	-6.60342	4.01775e-11	3.38584e-10	56220
Prmt2	639.25	-0.430574	0.0926266	-4.64849	3.34371e-06	1.74531e-05	15468
Zfp24	1409.66	0.740432	0.0481272	15.3849	2.06653e-53	9.32637e-52	59057
Hbp1	554.573	-0.428137	0.103377	-4.1415	3.45034e-05	0.000157499	73389
Zbtb14	419.638	-0.425652	0.0851884	-4.9966	5.83504e-07	3.33565e-06	22666
Zbtb49	291.162	-0.425094	0.114854	-3.70117	0.000214606	0.000854701	75079
Wwp1	919.378	0.738628	0.0773555	9.54849	1.31606e-21	2.07668e-20	107568
Ikzf2	486.107	-0.423548	0.124729	-3.39573	0.000684455	0.00248399	22779
Pogz	2739.91	-0.423235	0.0499127	-8.47952	2.26131e-17	2.94093e-16	229584
Zmat3	879.364	0.735844	0.0702311	10.4775	1.0965e-25	2.05435e-24	22401
Prmt1	926.687	-0.418623	0.0652672	-6.41399	1.41762e-10	1.14652e-09	15469
Ppargc1b	112.302	0.723787	0.196515	3.68312	0.000230396	0.000912272	170826
Zfp286	275.016	-0.409752	0.105542	-3.88235	0.000103452	0.000435457	192651
Bola3	271.551	0.704403	0.142448	4.94498	7.61513e-07	4.29425e-06	78653
Taf1	2865.09	-0.409186	0.0379346	-10.7866	3.98192e-27	7.93152e-26	270627
Basp1	6145.48	-0.40839	0.0597997	-6.8293	8.53322e-12	7.61122e-11	70350
Hdac2	2706.47	-0.407757	0.0439428	-9.27928	1.70629e-20	2.56686e-19	15182
Zfp239	132.765	0.70333	0.200409	3.50946	0.00044901	0.00168272	22685
Wwp2	600.079	-0.406466	0.0876739	-4.63611	3.55027e-06	1.84674e-05	66894
Mapk7	987.291	0.702023	0.0663628	10.5786	3.74615e-26	7.16837e-25	23939
Dvl2	515.36	-0.40415	0.0876868	-4.60902	4.04574e-06	2.09084e-05	13543
Mbd2	594.928	0.694461	0.100543	6.90708	4.94743e-12	4.51099e-11	17191
Ascl1	1505.88	-0.39985	0.107853	-3.70738	0.000209417	0.000836473	17172
Zfp691	112.931	0.692557	0.188832	3.66758	0.000244854	0.000964516	195522
Zfp334	1037.79	-0.395013	0.0693797	-5.69349	1.24469e-08	8.52861e-08	228876
Zbtb37	1359.31	-0.394849	0.0732171	-5.39286	6.93452e-08	4.38901e-07	240869
Tcf3	1866.29	-0.393567	0.0634212	-6.2056	5.44893e-10	4.1998e-09	21423
L3mbtl3	768.442	-0.391792	0.0719873	-5.44251	5.25336e-08	3.36353e-07	237339
Zscan26	466.029	0.691769	0.120408	5.74518	9.18212e-09	6.38301e-08	432731
Tsc22d4	524.88	0.691408	0.102032	6.77636	1.23241e-11	1.08509e-10	78829
Parp12	166.33	0.689946	0.175203	3.93798	8.21714e-05	0.000352709	243771
Atrx	11690.6	-0.391406	0.0431853	-9.06343	1.26417e-19	1.82706e-18	22589
Zfp462	9378.69	0.689747	0.0387652	17.7929	8.0165e-71	5.43966e-69	242466
Sorbs3	368.209	0.677854	0.0952916	7.11347	1.1316e-12	1.0863e-11	20410
Bbx	1188.45	-0.391104	0.0814822	-4.79987	1.58772e-06	8.62131e-06	70508
Zfp280d	1500.67	-0.386442	0.0663337	-5.82572	5.68675e-09	4.02036e-08	235469
Raf1	941.827	-0.382327	0.0717014	-5.33221	9.70258e-08	6.04106e-07	110157
Ncoa4	736.271	0.677283	0.0860304	7.8726	3.47334e-15	3.94053e-14	27057
Pfn1	1203.24	0.677245	0.0849146	7.9756	1.51644e-15	1.77225e-14	18643
Mbd4	311.797	-0.38228	0.12328	-3.10091	0.00192925	0.0063679	17193
Ddit3	183.815	-0.381426	0.117291	-3.25195	0.00114615	0.0039833	13198
Zfp2	371.747	-0.380693	0.105104	-3.62208	0.000292246	0.00113402	22678
Ubp1	1682.17	-0.380408	0.0492684	-7.72113	1.15302e-14	1.26366e-13	22221
Arrb1	1957.95	-0.379158	0.056201	-6.74647	1.51487e-11	1.32404e-10	109689
Nab1	796.021	0.672137	0.0809767	8.30037	1.03784e-16	1.30254e-15	17936
Zbed4	293.613	-0.376982	0.122317	-3.082	0.00205614	0.00675411	223773
Zfp12	970.096	-0.376758	0.0572326	-6.58292	4.61285e-11	3.86464e-10	231866
Meis1	859.325	-0.375851	0.0896499	-4.19243	2.75986e-05	0.000127603	17268
Nono	6332.97	-0.375133	0.0506314	-7.4091	1.27162e-13	1.3003e-12	53610
Myc	413.762	0.659546	0.141231	4.66998	3.01234e-06	1.58212e-05	17869
Bola1	60.1829	0.657757	0.220224	2.98676	0.0028195	0.00899802	69168
Usf2	730.871	-0.374978	0.0736653	-5.09029	3.57512e-07	2.08953e-06	22282
Creb3l1	76.6703	0.650832	0.210821	3.08714	0.00202095	0.00664763	26427
Zc3h4	2225.46	-0.373614	0.0444819	-8.39924	4.4939e-17	5.75071e-16	330474
Zfp367	292.262	-0.372357	0.124761	-2.98457	0.00283973	0.00905653	238673
Rbmx	3939.94	-0.371056	0.0467496	-7.93711	2.06953e-15	2.3933e-14	19655
Zfp9	476.538	-0.369128	0.0908281	-4.06402	4.82337e-05	0.000215111	22750
Dynll1	1465.26	0.648032	0.0524305	12.3598	4.31029e-35	1.16826e-33	56455
Eya3	643.461	-0.368411	0.0784217	-4.69782	2.62953e-06	1.39176e-05	14050
Foxk1	695.655	0.647392	0.0956488	6.76843	1.3019e-11	1.14381e-10	17425
Rfx7	2320.44	-0.362629	0.0510177	-7.10792	1.17803e-12	1.12899e-11	319758
Hivep2	1586.08	0.641927	0.0883158	7.26854	3.63386e-13	3.61785e-12	15273
Chtop	1414.91	0.636082	0.062859	10.1192	4.542e-24	7.9834e-23	66511
Ctcf	2124.49	-0.361554	0.0345222	-10.4731	1.14822e-25	2.14705e-24	13018
Rora	512.618	0.626007	0.0926123	6.75944	1.38527e-11	1.21483e-10	19883
Zfp641	285.037	0.623719	0.106718	5.84456	5.07906e-09	3.60317e-08	239652
Map2k1	377.145	0.621694	0.0913132	6.80837	9.87123e-12	8.76923e-11	26395
Zfp791	66.1979	0.612971	0.185452	3.30527	0.000948837	0.00334823	244556
Pknox2	993.385	0.609499	0.0719038	8.47659	2.31886e-17	3.01304e-16	208076
Elmsan1	491.218	-0.357687	0.106105	-3.37106	0.000748807	0.00269742	238317
Ebf4	354.76	0.606676	0.113083	5.36487	8.10053e-08	5.09442e-07	228598
Emsy	2224.32	-0.354627	0.0466837	-7.59637	3.0455e-14	3.23281e-13	233545
Jmjd1c	6596.77	0.605312	0.0347881	17.4	8.25508e-68	5.26545e-66	108829
Fubp1	5841.44	-0.353497	0.041943	-8.42802	3.51555e-17	4.5331e-16	51886
Prdx5	354.79	0.604653	0.123076	4.91282	8.97738e-07	5.01611e-06	54683
Usf1	660.427	-0.351305	0.0546211	-6.43167	1.26209e-10	1.02477e-09	22278
Nr2c2	1775.61	-0.350928	0.0382536	-9.17371	4.57026e-20	6.74448e-19	22026
Zfp605	465.577	-0.350533	0.095361	-3.67585	0.000237055	0.000936699	675812
Jarid2	1891.91	-0.347236	0.0584246	-5.94332	2.79305e-09	2.02599e-08	16468
Zfp422	826.702	-0.346397	0.0634675	-5.45786	4.81897e-08	3.09785e-07	67255
Smarcad1	1740.23	-0.345989	0.0573288	-6.03517	1.58799e-09	1.17748e-08	13990
Med24	962.136	-0.345056	0.0863528	-3.99588	6.44533e-05	0.000282013	23989
Zfp706	1116.75	-0.34237	0.0548466	-6.24232	4.31125e-10	3.35446e-09	68036
Zbed3	427.521	0.601078	0.0853555	7.04205	1.89428e-12	1.78795e-11	72114
Notch1	5809.4	0.600531	0.0777745	7.72144	1.15022e-14	1.26107e-13	18128
Gmeb1	730.614	-0.338686	0.0972303	-3.48334	0.000495207	0.00184501	56809
Zfp644	2982.61	-0.338678	0.0498288	-6.79684	1.06942e-11	9.47397e-11	52397
Zkscan5	372.697	-0.338455	0.106457	-3.17926	0.00147653	0.00500954	22757
Tgfb1i1	267.14	0.593066	0.15318	3.87168	0.000108086	0.000453564	21804
Akt1	2203.87	-0.337803	0.0440568	-7.66743	1.75471e-14	1.89202e-13	11651
Foxn3	1707.33	-0.337375	0.0585088	-5.76622	8.10682e-09	5.66293e-08	71375
Trps1	1560.76	0.584351	0.0499172	11.7064	1.18169e-31	2.84787e-30	83925
Ybx3	1299.95	0.56636	0.082102	6.89825	5.26477e-12	4.78514e-11	56449
Klf6	687.99	0.565623	0.105219	5.37566	7.63035e-08	4.81244e-07	23849
Nfat5	3232.56	0.562311	0.0539467	10.4234	1.93812e-25	3.5844e-24	54446
Kdm4a	2313.75	-0.336446	0.0515857	-6.52207	6.93444e-11	5.74262e-10	230674
Prdm2	2274.69	-0.33639	0.0489761	-6.86845	6.49011e-12	5.83784e-11	110593
Med13l	2604.65	-0.335951	0.0620748	-5.41203	6.23128e-08	3.96401e-07	76199
Zfp710	691.944	-0.33594	0.0897926	-3.74129	0.000183076	0.000739074	209225
Zscan21	839.268	-0.335795	0.0874093	-3.84164	0.000122217	0.000509145	22697
Tbp	833.894	-0.333205	0.0791071	-4.21207	2.5304e-05	0.000117734	21374
Nkrf	315.729	0.560384	0.0946299	5.92185	3.18348e-09	2.29933e-08	77286
Sox9	4215.56	0.558359	0.0795438	7.01951	2.22644e-12	2.08842e-11	20682
Fiz1	367.58	-0.33312	0.0955091	-3.48783	0.00048695	0.00181566	23877
Zbtb1	864.954	0.558096	0.107914	5.17168	2.31997e-07	1.38441e-06	268564
Smad1	715.554	0.557015	0.0536411	10.3841	2.92887e-25	5.36828e-24	17125
Rfx5	356.89	0.551574	0.127374	4.33036	1.48866e-05	7.12862e-05	53970
Cux2	1328.86	0.545366	0.0963537	5.66004	1.51334e-08	1.02689e-07	13048
Smad4	1222.15	-0.333091	0.0661662	-5.03416	4.79943e-07	2.77402e-06	17128
Thap7	101.348	0.536624	0.181514	2.95638	0.00311269	0.00982462	69009
Sall2	1749.03	0.53523	0.0462218	11.5796	5.22844e-31	1.22308e-29	50524
Zfp60	1027.52	-0.332206	0.0762035	-4.35946	1.30383e-05	6.28974e-05	22718
Cdk2	404.9	0.53303	0.140552	3.79239	0.000149206	0.000611642	12566
Fubp3	1153.14	0.531695	0.0559244	9.50738	1.95517e-21	3.05993e-20	320267
Zfp715	403.388	0.521439	0.0790747	6.59426	4.27391e-11	3.59116e-10	69930
Gatad2a	1365.72	0.51751	0.0704362	7.34722	2.02372e-13	2.04964e-12	234366
Stat5b	480.445	0.509706	0.106497	4.78612	1.70033e-06	9.19624e-06	20851
Ddx5	13231.9	-0.33204	0.0354702	-9.3611	7.89095e-21	1.20411e-19	13207
Trp53	523.924	-0.327402	0.101195	-3.23536	0.00121491	0.00419531	22059
Zfp212	325.613	-0.326242	0.103257	-3.15951	0.00158033	0.00532568	232784
Cic	3837.33	-0.324541	0.0495491	-6.54989	5.75792e-11	4.7932e-10	71722
Mdm4	2953.31	-0.321796	0.0461407	-6.97422	3.07567e-12	2.85238e-11	17248
Mafg	832.69	-0.32131	0.0627001	-5.12455	2.98255e-07	1.75967e-06	17134
Zfp747	80.9849	0.508315	0.167723	3.03069	0.00243999	0.00788948	269997
Mdm2	1198.28	-0.320472	0.0729501	-4.39304	1.11779e-05	5.44441e-05	17246
Rps6ka3	893.41	0.504549	0.0590238	8.54823	1.24996e-17	1.63974e-16	110651
Maz	1481.1	-0.317796	0.064926	-4.89475	9.84328e-07	5.47967e-06	17188
Ddb2	106.978	0.503226	0.161122	3.12326	0.0017886	0.00594951	107986
Smarca4	9276.64	-0.312536	0.0413949	-7.5501	4.34935e-14	4.57791e-13	20586
Mllt1	1055.34	-0.31251	0.0696538	-4.48662	7.23619e-06	3.621e-05	64144
Pou2f2	381.706	-0.311564	0.0988562	-3.15169	0.00162328	0.00544948	18987
Axin2	870.963	0.502795	0.0779243	6.45235	1.10128e-10	8.98283e-10	12006
Zfp827	2052.29	0.501332	0.0695038	7.21301	5.47281e-13	5.37598e-12	622675
Ezh1	491.231	-0.309997	0.0966701	-3.20675	0.00134242	0.00459638	14055
Smad3	537.355	0.499979	0.0791094	6.3201	2.61397e-10	2.07033e-09	17127
Zfp1	334.95	-0.307534	0.0890872	-3.45206	0.000556329	0.00205117	22640
Zfp397	1533.68	-0.306521	0.0685071	-4.4743	7.66618e-06	3.82416e-05	69256
Hif1a	2166.44	0.493985	0.0456782	10.8144	2.94059e-27	5.89413e-26	15251
Zeb1	6138.34	0.493069	0.0441025	11.1801	5.10485e-29	1.10252e-27	21417
Med4	764.337	-0.305907	0.0549614	-5.56584	2.60891e-08	1.72941e-07	67381
Ice1	3634.08	-0.304814	0.0400718	-7.60668	2.81221e-14	2.98848e-13	218333
Bptf	7986.63	-0.304508	0.0381413	-7.98367	1.4204e-15	1.66475e-14	207165
Satb1	1789.77	0.489479	0.0607695	8.05467	7.96905e-16	9.50294e-15	20230
Nrip1	1193.42	0.484495	0.0771806	6.27742	3.4423e-10	2.69957e-09	268903
Crebbp	7693.9	-0.301542	0.0379257	-7.95088	1.85193e-15	2.15032e-14	12914
Sap30bp	721.051	-0.298256	0.0822319	-3.62701	0.000286724	0.0011141	57230
Phf2	1959.64	-0.293115	0.0462166	-6.34221	2.26492e-10	1.80033e-09	18676
Per2	542.761	0.482779	0.121208	3.98306	6.80342e-05	0.000296641	18627
Mxd4	1011.55	0.482027	0.0709621	6.79273	1.1003e-11	9.73245e-11	17122
Preb	704.387	0.472463	0.0711513	6.64026	3.13126e-11	2.66617e-10	50907
Aff2	497.843	0.468462	0.134146	3.49219	0.000479078	0.0017877	14266
Pelp1	885.28	-0.291948	0.0537548	-5.43111	5.6006e-08	3.57947e-07	75273
Matr3	2865.75	-0.290364	0.043985	-6.60145	4.07162e-11	3.42922e-10	17184
Skil	2008.82	0.464865	0.064771	7.17705	7.12299e-13	6.93525e-12	20482
Vezf1	959.666	0.459743	0.086529	5.31316	1.07737e-07	6.6747e-07	22344
Bach1	1011.66	-0.289021	0.079449	-3.63782	0.000274959	0.00107289	12013
Rbbp4	2121.51	-0.285632	0.0499645	-5.7167	1.08612e-08	7.49219e-08	19646
Setd7	1776.26	-0.284759	0.0508161	-5.60371	2.09807e-08	1.40572e-07	73251
Kat2b	538.597	-0.28306	0.0912656	-3.1015	0.00192541	0.00635815	18519
Ruvbl1	717.511	-0.282308	0.0873693	-3.2312	0.00123271	0.00425065	56505
Pkn2	1625.66	-0.281973	0.0526252	-5.35813	8.40875e-08	5.27439e-07	109333
Txn1	278.545	0.454787	0.12191	3.7305	0.0001911	0.000768549	22166
Gnas	883.071	0.452541	0.0642958	7.03842	1.94428e-12	1.83394e-11	14683
Cenpt	496.305	-0.280849	0.0925755	-3.03373	0.00241549	0.00781995	320394
Lcorl	1795.86	0.450738	0.0645281	6.98514	2.84569e-12	2.64678e-11	209707
Tada2b	445.509	0.446868	0.0924733	4.8324	1.34896e-06	7.38214e-06	231151
Cnot1	4752.59	-0.278486	0.0370583	-7.5148	5.6997e-14	5.9577e-13	234594
Cnot8	874.036	-0.278476	0.0677508	-4.1103	3.95148e-05	0.000178557	69125
Tcerg1	4183	-0.277447	0.0375425	-7.3902	1.46606e-13	1.49503e-12	56070
Tcf12	3786.55	0.442777	0.0377397	11.7324	8.69654e-32	2.10825e-30	21406
Rbbp5	869.827	-0.275972	0.0580053	-4.7577	1.95814e-06	1.05153e-05	213464
Ccnc	364.649	0.440837	0.0847011	5.20462	1.94398e-07	1.17026e-06	51813
Rbl1	763.773	-0.275898	0.0931837	-2.96079	0.00306847	0.00969661	19650
Rad21	5786.67	-0.272172	0.0773082	-3.52061	0.000430556	0.00162118	19357
Mier2	394.086	-0.271232	0.0883116	-3.0713	0.00213126	0.00698407	70427
Zfp451	3311.47	-0.27106	0.0403919	-6.71075	1.93631e-11	1.68112e-10	98403
Src	1441.74	0.437174	0.0584831	7.47522	7.70725e-14	7.97481e-13	20779
Tox	672.093	0.432906	0.0767973	5.63699	1.7305e-08	1.16762e-07	252838
Cnot3	1608.85	-0.270315	0.055901	-4.8356	1.32747e-06	7.27145e-06	232791
Nrf1	1128.53	-0.270271	0.0804941	-3.35766	0.000786065	0.00281502	18181
Rela	582.969	0.432382	0.0902876	4.78894	1.67665e-06	9.07331e-06	19697
Kmt2c	9403.22	-0.268964	0.034369	-7.82578	5.04533e-15	5.66573e-14	231051
Tdrd3	1152.81	-0.26893	0.0657846	-4.08803	4.35044e-05	0.000195385	219249
Atf7ip	4675.39	-0.268317	0.0290383	-9.2401	2.46264e-20	3.67577e-19	54343
Rrn3	807.918	-0.266938	0.0816561	-3.26905	0.00107909	0.00376849	106298
Zfp518a	517.782	0.427984	0.10757	3.97867	6.93017e-05	0.000301663	72672
Zfp280c	957.387	-0.266067	0.0764775	-3.47902	0.000503249	0.00187132	208968
Zc3h7a	1874.04	0.427821	0.046588	9.18308	4.18949e-20	6.19211e-19	106205
Ifrd1	367.251	0.422622	0.116075	3.64093	0.000271658	0.00106101	15982
Trip4	794.179	0.418667	0.0871925	4.80164	1.5737e-06	8.55003e-06	56404
Smarca2	4339.29	0.411242	0.0593567	6.92832	4.25854e-12	3.90645e-11	67155
Prdm15	701.474	-0.264734	0.0752745	-3.51691	0.000436607	0.00164073	114604
Kat2a	766.297	0.406122	0.0659466	6.15835	7.35081e-10	5.5936e-09	14534
Zfp787	271.957	0.400248	0.114404	3.49855	0.000467801	0.00174766	67109
Rfxap	368.625	0.388396	0.127122	3.05531	0.00224829	0.00731994	170767
Pcbp4	1134.47	-0.263904	0.0724736	-3.64138	0.000271176	0.00105942	59092
Unk	843.519	-0.261639	0.0649801	-4.02644	5.66269e-05	0.000249825	217331
Zfp148	2347.81	-0.259737	0.0435478	-5.96442	2.455e-09	1.78802e-08	22661
Rc3h2	2881.11	-0.2595	0.0587857	-4.41434	1.01318e-05	4.97201e-05	319817
Heatr1	940.191	0.387687	0.0766363	5.05879	4.21928e-07	2.44958e-06	217995
Cipc	838.928	0.383996	0.0952226	4.03261	5.51597e-05	0.000243764	217732
Xbp1	554.248	0.381364	0.089804	4.24662	2.17018e-05	0.000101749	22433
Kdm4b	1218.02	-0.25942	0.0659447	-3.93391	8.35767e-05	0.000357885	193796
Zfp523	839.043	0.370957	0.0870135	4.26321	2.01511e-05	9.48657e-05	224656
Smad5	3204.59	0.369352	0.0521782	7.07866	1.45551e-12	1.38519e-11	17129
Akirin2	986.176	-0.258255	0.079838	-3.23473	0.00121757	0.00420351	433693
Zfp37	687.462	0.364587	0.0784859	4.64525	3.39668e-06	1.77167e-05	22696
Traf6	517.358	0.355133	0.0892393	3.97956	6.90425e-05	0.000300672	22034
Sap130	1651.84	-0.257062	0.0538305	-4.77541	1.79346e-06	9.67442e-06	269003
Dnajc21	580.662	-0.255067	0.0818433	-3.11652	0.00182998	0.00607587	78244
Mta1	1813.4	-0.253378	0.0642429	-3.94407	8.01101e-05	0.000344428	116870
Elk4	1139.06	0.350803	0.0900643	3.89503	9.81853e-05	0.000415053	13714
Zmym2	2238.26	-0.252852	0.0744597	-3.39583	0.000684218	0.00248345	76007
Hmg20b	315.317	0.349484	0.101871	3.43064	0.000602153	0.00220905	15353
Dnajc1	977.835	0.346978	0.0715365	4.85036	1.23238e-06	6.77382e-06	13418
Hif1an	750.25	-0.252368	0.0795599	-3.17205	0.00151369	0.00511748	319594
Zfp335	664.166	-0.250463	0.0809493	-3.09407	0.00197429	0.00650386	329559
Ctbp1	1892.48	-0.249742	0.0628622	-3.97285	7.10192e-05	0.000308344	13016
Zfp746	568.508	0.339964	0.0734193	4.63044	3.64888e-06	1.8946e-05	69228
Maged1	8704.29	0.33387	0.0491771	6.78914	1.12805e-11	9.96567e-11	94275
Map2k5	607.361	0.333505	0.0732715	4.55163	5.3233e-06	2.71393e-05	23938
Gon4l	1201.65	-0.249638	0.0634107	-3.93685	8.25578e-05	0.000353944	76022
Srebf2	3220.39	0.312937	0.0631814	4.95299	7.30804e-07	4.13e-06	20788
Nelfcd	527.942	-0.2496	0.0764104	-3.26657	0.00108859	0.00379979	57314
Dnmt1	4900.47	-0.249542	0.0608217	-4.10284	4.08109e-05	0.000184095	13433
Arid4b	3397.76	-0.244905	0.0474432	-5.16206	2.44241e-07	1.45325e-06	94246
L3mbtl2	469.702	0.311189	0.0921888	3.37556	0.000736659	0.00265766	214669
Pdcd4	1572.03	0.310148	0.0564229	5.49684	3.86652e-08	2.51771e-07	18569
Mga	4123.05	-0.244139	0.0415758	-5.87216	4.30166e-09	3.06759e-08	29808
Bclaf1	5399.67	-0.243568	0.0386624	-6.29989	2.97866e-10	2.34752e-09	72567
Zfp260	1054.28	-0.243533	0.0610706	-3.98774	6.67068e-05	0.00029134	26466
Gatad2b	3219.64	-0.242524	0.0516643	-4.69422	2.67622e-06	1.41517e-05	229542
Zbtb4	660.411	0.309642	0.0753866	4.10739	4.00155e-05	0.000180705	75580
Zfp385a	392.227	0.308912	0.0782229	3.94912	7.8438e-05	0.000337795	29813
Prkaa1	564.488	0.302613	0.077194	3.92017	8.84873e-05	0.000377056	105787
Nup85	677.431	-0.241464	0.0813326	-2.96885	0.00298915	0.00947936	445007
Xpo1	4973.26	-0.240933	0.0407225	-5.91646	3.28938e-09	2.37224e-08	103573
Psmc3	1388.98	0.296193	0.0854614	3.46581	0.00052863	0.00195759	19182
Meaf6	941.39	-0.239846	0.056719	-4.22868	2.35067e-05	0.00010987	70088
Brd8	3202.96	-0.235278	0.0666787	-3.52853	0.000417881	0.00157739	78656
Zfp207	4179.27	-0.231807	0.047637	-4.86611	1.13817e-06	6.27885e-06	22680
Zfp629	949.709	-0.231186	0.0680289	-3.39835	0.00067793	0.00246241	320683
Bhlhb9	1218.79	0.295315	0.0679321	4.3472	1.37883e-05	6.63148e-05	70237
Hmgb1	8142.28	-0.227138	0.0684985	-3.31596	0.000913294	0.00323513	15289
Sox2	2403.67	-0.224406	0.0565847	-3.96584	7.31367e-05	0.000316867	20674
Cops2	1166.69	0.294364	0.0679391	4.33277	1.47248e-05	7.05703e-05	12848
Arnt2	2929.84	-0.223186	0.0751082	-2.97153	0.00296317	0.00940632	11864
Zfp281	974.662	0.293836	0.0497781	5.90292	3.5712e-09	2.57096e-08	226442
Peg3	5132.48	0.291622	0.0409427	7.1227	1.05832e-12	1.01867e-11	18616
Aebp2	883.149	0.278109	0.0655798	4.24077	2.22753e-05	0.000104267	11569
Sltm	4440.53	-0.222695	0.0456762	-4.87552	1.08523e-06	6.00645e-06	66660
Cbx4	320.939	0.277379	0.0830083	3.34158	0.000833019	0.00296836	12418
Tsc22d1	4536.02	0.276617	0.0547741	5.05014	4.41477e-07	2.55788e-06	21807
Atf6b	517.437	0.2754	0.0784149	3.51208	0.000444612	0.00166798	12915
Hcfc1	4296.47	-0.222294	0.0601474	-3.69582	0.000219178	0.000871581	15161
Zfp945	924.642	0.273739	0.0783485	3.49387	0.00047608	0.00177744	240041
Zbtb10	835.83	-0.221283	0.0679817	-3.25504	0.00113376	0.00394404	229055
Wdhd1	622.084	-0.218952	0.071084	-3.08019	0.00206869	0.00679066	218973
Zfp655	683.766	-0.218695	0.0641132	-3.41108	0.000647052	0.00236169	72611
Cbfb	698.058	0.267731	0.0651081	4.1121	3.92079e-05	0.000177282	12400
Zfp384	1049.51	-0.216647	0.071127	-3.04592	0.00231971	0.00753368	269800
Cdc73	1241.67	-0.216388	0.0540228	-4.0055	6.18854e-05	0.000271564	214498
Tax1bp1	2681.21	0.267413	0.059493	4.49486	6.96145e-06	3.49021e-05	52440
Nfrkb	1091.91	-0.21434	0.0722043	-2.96852	0.00299237	0.00948746	235134
Kmt2d	10461.9	-0.212505	0.0482016	-4.40868	1.04004e-05	5.09513e-05	381022
Brd7	2062.31	0.262604	0.0550891	4.7669	1.87083e-06	1.0071e-05	26992
Aff4	6189.77	-0.209882	0.0416955	-5.03368	4.81156e-07	2.77992e-06	93736
Snd1	1396.3	0.262257	0.0529104	4.95662	7.17288e-07	4.05521e-06	56463
Kdm2a	2246.95	-0.20961	0.0503025	-4.167	3.0864e-05	0.000141612	225876
Rlim	1886.55	-0.209377	0.0492518	-4.25116	2.1267e-05	9.98735e-05	19820
Kdm4c	949.891	0.261641	0.0521574	5.01638	5.26532e-07	3.02867e-06	76804
Tfdp1	1439.12	0.260579	0.0703523	3.70391	0.000212299	0.000847041	21781
Bag1	1091.81	-0.207784	0.0651277	-3.19041	0.00142073	0.00483856	12017
Usp7	3476.38	-0.206237	0.0432325	-4.77041	1.83852e-06	9.91192e-06	252870
Ccnh	460.436	0.256028	0.0802573	3.19008	0.00142232	0.00484338	66671
Zfp652	2344.01	0.243501	0.05093	4.7811	1.74343e-06	9.41163e-06	268469
Mta2	1390.15	-0.206099	0.0463511	-4.44647	8.72945e-06	4.33048e-05	23942
Cbx3	2806.14	-0.205327	0.0537952	-3.81683	0.000135179	0.000558439	12417
Tcf25	3140.23	0.240859	0.0418403	5.75663	8.58094e-09	5.98248e-08	66855
Trrap	6037.31	-0.203347	0.0315135	-6.45269	1.09884e-10	8.96785e-10	100683
Zfp318	2287.1	0.239924	0.048725	4.92404	8.47747e-07	4.74695e-06	57908
Tle4	1380.41	0.238239	0.0645474	3.69092	0.000223443	0.000886822	21888
Zfp687	847.493	0.237268	0.0786371	3.01725	0.00255081	0.00821544	78266
Kmt2b	2657.78	-0.203183	0.0390534	-5.2027	1.96419e-07	1.18119e-06	75410
Gabpa	995.113	0.232462	0.0697628	3.33218	0.000861676	0.00306363	14390
Zxdc	773.945	0.228471	0.0706016	3.23606	0.00121191	0.00418599	80292
Hsf2	1176.84	-0.200789	0.064026	-3.13605	0.00171242	0.00571994	15500
Hivep1	1716.22	-0.200094	0.0522305	-3.83098	0.000127632	0.000529396	110521
Rere	5279.17	-0.198152	0.0395521	-5.00989	5.44605e-07	3.12511e-06	68703
Psmc1	1455.55	0.224855	0.06017	3.737	0.000186229	0.000751067	19179
Rc3h1	1801.46	-0.197061	0.0480994	-4.09695	4.1862e-05	0.000188481	381305
Zfp131	1138.04	-0.191729	0.0648638	-2.95588	0.00311783	0.00983536	72465
Brwd1	3176.53	-0.189442	0.0522062	-3.62872	0.000284825	0.00110777	93871
Agap2	3563.52	0.224494	0.0742562	3.02324	0.00250086	0.00807085	216439
Mysm1	1499.62	0.216238	0.0631708	3.42307	0.000619184	0.00226689	320713
Pcbp2	2507.07	-0.188353	0.0483875	-3.8926	9.91737e-05	0.000419108	18521
Setx	2758.92	-0.187882	0.0542618	-3.46251	0.00053516	0.00198003	269254
Dnmt3a	3662.6	-0.186715	0.0377418	-4.94717	7.53017e-07	4.24967e-06	13435
Sox12	2005.93	-0.184542	0.062262	-2.96396	0.00303711	0.0096102	20667
Cramp1l	1362.82	-0.18407	0.0605733	-3.0388	0.0023752	0.00769937	57354
Chuk	1212.55	0.207022	0.0669155	3.09379	0.00197619	0.00650935	12675
Ikbkb	1079.92	-0.184003	0.0522082	-3.52441	0.000424428	0.00159915	16150
Med14	1437.18	-0.175784	0.0455059	-3.86288	0.000112056	0.00046947	26896
Strap	1671.33	0.204552	0.064848	3.15433	0.00160867	0.00540927	20901
Jak2	1550.55	0.190411	0.0478128	3.98242	6.8216e-05	0.000297388	16452
Zkscan1	3606.66	0.18115	0.0513975	3.5245	0.000424288	0.00159884	74570
Sfpq	12164.8	-0.171068	0.0330778	-5.1717	2.31977e-07	1.38441e-06	71514
Med13	3832.43	-0.166687	0.0494314	-3.37208	0.000746019	0.00268872	327987
Ncoa6	2952.53	-0.163112	0.051006	-3.19789	0.00138437	0.00472761	56406
Hsph1	2144.22	-0.156381	0.0505993	-3.09056	0.00199776	0.00657438	15505
Nfe2l1	1525.82	0.165535	0.0454754	3.64009	0.000272541	0.00106403	18023
Cand1	2382.72	-0.148808	0.0430745	-3.45465	0.000550999	0.0020336	71902
Sin3b	1351.11	-0.141467	0.0470407	-3.00734	0.00263546	0.00846246	20467
Zfp91	2346.67	-0.134874	0.045366	-2.97301	0.00294893	0.00936526	109910
Ash1l	6288.79	-0.133073	0.0388934	-3.42148	0.000622818	0.00227962	192195
Zfp608	2647.97	-0.127491	0.0356328	-3.57791	0.000346356	0.00132676	269023
Hnrnpa2b1	14612.8	-0.107427	0.03156	-3.4039	0.00066432	0.00241887	53379
Rbm39	5312.19	-0.0828258	0.0277076	-2.98928	0.00279633	0.00893033	170791
Fer	1337.46	0.154334	0.0482991	3.19538	0.00139645	0.00476263	14158
Gtf2i	5270.3	0.110973	0.036599	3.03214	0.00242829	0.00785696	14886

## Sheet: Transcription Factors STEST
	baseMean	log2FoldChange	simScore
Eomes	62.2611	-9.0051	0.595041
Tfap2c	41.5905	-6.68855	0.656206
Sp8	736.5	-6.2956	0.535298
Dlx1	4374.81	-5.34431	0.774534
Barhl2	4.73247	-5.26684	0.649941
Lhx9	3.18519	-5.20361	0.674838
Nhlh2	4.47478	-5.18569	0.616211
Pax7	2.96762	-5.09099	0.669554
Dlx2	1792.28	-5.01216	0.732303
Tfap2d	25.0392	-4.69085	0.661777
Tbx5	5.01603	-4.58767	0.686091
Neurog2	27.5201	-4.47898	0.705169
Arx	1845.3	-4.22515	0.639933
Scrt2	646.844	-4.02696	0.544866
Insm1	528.908	-3.88992	0.630322
Dlx5	940.017	-3.88581	0.718018
Sp9	2427.46	-3.87548	0.519005
Nkx2-3	11.4479	-3.67365	0.674384
Lhx6	626.787	-3.6383	0.681828
Pax6	1283.53	-3.54347	0.695857
Dlx6	563.294	-3.38735	0.683566
Lhx8	23.1715	-3.30096	0.519305
St18	869.961	-3.21428	0.604135
Tbr1	228.011	-2.94988	0.663523
Neurod1	18.4345	-2.87784	0.691576
Bcl11a	4776.82	-2.83382	0.568284
Fezf2	39.7083	-2.80625	0.694692
Sox11	10187.4	-2.73582	0.616972
Id4	1336.47	-2.73036	0.622973
Dmrta2	32.9141	-2.66986	0.613019
Plagl1	807.316	-2.47373	0.621675
Sox1	2291.31	-2.42303	0.659387
Neurod2	99.8641	-2.37328	0.711634
Prdm16	873.671	-2.24278	0.619714
Mlxipl	56.028	-2.23813	0.711977
Isl1	138.032	-2.23709	0.616532
Meis2	9943.9	-2.21989	0.672772
Vax1	128.909	-2.15679	0.616213
Pbx3	2134.15	-2.10344	0.637397
Scrt1	511.818	-2.06732	0.556684
Bcl11b	5459.74	-2.06101	0.643033
Arid3b	208.519	-2.04985	0.74865
Maf	423.021	-2.03605	0.692786
Runx1t1	1720	-1.8778	0.549303
Cited2	540.545	-1.83852	0.579552
Foxo6	351.845	-1.80773	0.625318
Zfhx3	2511.6	-1.75648	0.650227
Taf7l	15.1493	-1.75358	0.563544
Gli1	198.394	-1.74563	0.658478
Rfx2	138.791	-1.73343	0.591849
Notch2	2045.61	-1.71525	0.522165
Pou3f4	1180.96	-1.71343	0.608253
Tle1	1476.95	-1.69403	0.592145
Pbx1	5246.71	-1.68613	0.704295
Myt1l	3999.61	-1.68452	0.679804
Mycn	679.048	-1.68208	0.626217
Prox1	787.71	-1.62541	0.68255
Akna	1232.01	-1.60179	0.578419
Rbfox2	4555.19	-1.5977	0.58408
Foxg1	2130.98	-1.57337	0.691833
Klf5	202.402	-1.55843	0.745271
Rarb	336.098	-1.55481	0.659842
Gli3	927.151	-1.55361	0.641628
Bcor	1487.05	-1.54294	0.501292
Gli2	455.9	-1.53054	0.627914
Zfp385b	118.781	-1.49721	0.650118
Hivep3	910.774	-1.4876	0.73496
E2f1	204.591	-1.48185	0.725195
Sox4	3044.1	-1.47369	0.678012
Esrrg	164.558	-1.45618	0.687395
Nfatc4	94.3396	-1.45358	0.703893
Zfp558	245.773	-1.44562	0.567421
Pou3f2	2558.25	-1.43676	0.743379
Nfib	10850.7	-1.3841	0.586484
Ikzf1	151.129	-1.37195	0.634328
Setbp1	4882.67	-1.34942	0.531748
Satb2	182.575	-1.34636	0.680894
Otx1	180.385	-1.34256	0.653121
Mef2c	1645.86	-1.32411	0.66767
Zfp704	6938.64	-1.32316	0.854139
Zhx2	715.401	-1.29836	0.562751
Tshz1	2644.17	-1.28641	0.525238
Zfhx2	2509.99	-1.281	0.532026
Tgif1	80.6415	-1.27904	0.57081
Hdac9	613.414	-1.27641	0.550343
Csrnp3	2035.73	-1.26568	0.628373
Pou2f1	2148.57	-1.26202	0.603354
Foxp3	37.559	-1.25839	0.610268
Tead2	501.191	-1.25186	0.70711
Camta1	2760.36	-1.2426	0.612566
Foxp1	4216.56	-1.23943	0.693195
Tead1	2621.12	-1.23206	0.704011
Sall1	1705.14	-1.2311	0.611399
Mllt11	1305.79	-1.19842	0.545565
Nfix	5981.45	-1.19198	0.591884
Klf7	1294.42	-1.18315	0.706378
Nr6a1	86.3496	-1.14903	0.598194
Cbfa2t2	803.432	-1.14287	0.573373
Zfp90	96.3477	-1.12541	0.593313
Foxj1	188.589	-1.12151	0.616575
Rcor2	762.4	-1.08933	0.7172
Nfil3	233.515	-1.07193	0.69807
Zic1	266.011	-1.05909	0.639919
Cbfa2t3	248.869	-1.01275	0.510956
Six5	65.4008	-0.99814	0.640634
Tcf20	5250.08	-0.99703	0.810313
Mafb	334.261	-0.992754	0.665979
Atf5	126.221	-0.987549	0.715972
Plag1	103.608	-0.982293	0.558419
Nlk	1588.3	-0.96225	0.524138
Mxi1	1516.74	-0.937173	0.559748
Zeb2	6999.11	-0.935461	0.602547
Tfap4	182.61	-0.9312	0.685817
Lhx2	469.694	-0.920408	0.729954
Zic5	71.9115	-0.902901	0.590242
Zbtb18	1888	-0.89917	0.603977
Nfkbil1	75.2354	-0.891851	0.522502
Arid1b	3941.71	-0.882083	0.552184
Hif3a	75.9717	-0.879279	0.554379
Zbtb16	257.534	-0.876055	0.640787
E2f7	576.104	-0.85666	0.686268
Nfya	405.379	-0.852902	0.63819
Pknox1	568.289	-0.825193	0.68216
Zfp536	706.063	-0.816901	0.540913
Sp3	1689.85	-0.815255	0.608085
Kdm5b	3077.62	-0.810385	0.571705
Zfp786	189.96	-0.805736	0.726217
Ncoa1	3149.28	-0.793054	0.643098
Hes6	334.205	-0.792751	0.655229
Mnt	646.638	-0.787128	0.635885
Rfx3	2400.62	-0.785036	0.672965
Ezh2	2370.03	-0.776014	0.576805
Tsg101	970.647	-0.775807	0.532077
Rps6ka5	571.331	-0.762561	0.524407
Foxo1	515.245	-0.762217	0.728592
E2f2	220.58	-0.75238	0.682732
Zfp113	504.5	-0.75168	0.522634
Etv1	1756.68	-0.750458	0.657397
Zfp553	529.732	-0.74624	0.726217
Zfp575	93.7665	-0.745132	0.641725
Prdm10	852.028	-0.722355	0.552848
Zc3h6	226.318	-0.717019	0.682214
Atf2	1214.74	-0.713628	0.685077
Kdm6b	3881.57	-0.699023	0.597838
Csrnp2	521.586	-0.692039	0.5629
Nkx2-1	207.481	-0.684255	0.69527
Tfdp2	910.393	-0.669188	0.587618
Cbx7	201.09	-0.660962	0.51753
Zfp821	1050.13	-0.660916	0.677757
Arid1a	8730.92	-0.659435	0.546104
Zfp668	402.908	-0.659308	0.757223
Zfp658	318.321	-0.652003	0.726217
Zfp609	2983.25	-0.642924	0.638708
Mtf2	1027.02	-0.642639	0.655169
Smad2	1085.15	-0.625845	0.64989
Hdac5	1075.07	-0.625054	0.623437
Zfp292	4013.2	-0.624034	0.839667
Ehmt2	2318.52	-0.622274	0.527835
Zfp646	1340.32	-0.62123	0.552848
Pbrm1	4351.58	-0.604244	0.519268
Zfp341	116.125	-0.604127	0.764835
Pygo1	981.937	-0.598458	0.605584
Nr2e1	552.239	-0.584181	0.713525
Nfyb	911.265	-0.583555	0.613045
Mecp2	2257.64	-0.573522	0.561434
Pcgf6	313.506	-0.571308	0.512598
Tcf4	9048	-0.571266	0.666264
Arid2	3158.32	-0.569484	0.661963
Zfp810	408.992	-0.565944	0.567421
Six3	561.79	-0.564099	0.689335
Creb1	2003.14	-0.560102	0.676284
Zfp444	429.994	-0.559073	1
Mycl	709.159	-0.555099	0.602673
Pou3f3	5855.46	-0.552626	0.722905
Khdrbs1	4220.01	-0.547837	0.526372
Mms19	654	-0.540657	0.514487
Rfx1	543.124	-0.536834	0.729882
Nfyc	700.785	-0.536771	0.571754
Pou6f1	1945.7	-0.535063	0.669243
Zfp408	344.746	-0.534613	0.678347
Prdm4	556.387	-0.532722	0.630295
Calcoco1	1235.36	-0.522687	0.63073
Bmi1	1418	-0.512386	0.561024
Mybl2	410.683	-0.511102	0.58118
Smarce1	3195.9	-0.509441	0.509947
Kdm5a	2234.65	-0.498457	0.507718
Tbpl1	391.855	-0.495813	0.581745
Zfp13	358.238	-0.487264	0.528591
Scaper	1762.7	-0.487185	0.537922
Rbpj	1171.48	-0.484419	0.65692
Zscan20	222.628	-0.484059	0.884203
Elf2	1337.5	-0.482615	0.660164
Klf11	269.437	-0.482381	0.594352
Rxrg	703.121	-0.476073	0.625501
Carm1	935.878	-0.472202	0.549469
Cux1	4674.61	-0.468294	0.530248
Zfp790	424.756	-0.468153	0.567421
Tet1	1475.98	-0.46762	0.650959
Kmt2a	9103.7	-0.464179	0.586009
Smarcc1	6492.7	-0.462202	0.552019
Maf1	370.122	-0.45581	0.616361
Meis3	702.203	-0.44829	0.508188
Zbtb5	528.73	-0.448118	0.522999
Cebpg	478.554	-0.44691	0.637414
Ccar2	1963.81	-0.443287	0.537922
Ube2i	2167.64	-0.441318	0.518038
Elk1	548.63	-0.439978	0.689935
Jun	2517.43	-0.439674	0.722347
Zbtb17	621.096	-0.438874	0.612167
Suz12	1151.01	-0.438534	0.543801
Prmt2	639.25	-0.430574	0.612975
Zbtb14	419.638	-0.425652	0.53675
Zbtb49	291.162	-0.425094	0.621534
Ikzf2	486.107	-0.423548	0.795995
Taf1	2865.09	-0.409186	0.560436
Hdac2	2706.47	-0.407757	0.584083
Wwp2	600.079	-0.406466	0.511662
Dvl2	515.36	-0.40415	0.53327
Ascl1	1505.88	-0.39985	0.672504
Tcf3	1866.29	-0.393567	0.678381
L3mbtl3	768.442	-0.391792	0.55799
Atrx	11690.6	-0.391406	0.510957
Zfp280d	1500.67	-0.386442	0.764835
Raf1	941.827	-0.382327	0.55364
Ddit3	183.815	-0.381426	0.682613
Ubp1	1682.17	-0.380408	0.511649
Arrb1	1957.95	-0.379158	0.555384
Meis1	859.325	-0.375851	0.679258
Nono	6332.97	-0.375133	0.500373
Usf2	730.871	-0.374978	0.632944
Zc3h4	2225.46	-0.373614	0.640873
Zfp367	292.262	-0.372357	0.562718
Rbmx	3939.94	-0.371056	0.547687
Zfp9	476.538	-0.369128	0.567421
Rfx7	2320.44	-0.362629	0.746159
Ctcf	2124.49	-0.361554	0.588856
Fubp1	5841.44	-0.353497	0.555895
Usf1	660.427	-0.351305	0.650428
Nr2c2	1775.61	-0.350928	0.60316
Jarid2	1891.91	-0.347236	0.647644
Zfp422	826.702	-0.346397	0.57782
Gmeb1	730.614	-0.338686	0.589522
Zfp644	2982.61	-0.338678	0.82944
Akt1	2203.87	-0.337803	0.540661
Prdm2	2274.69	-0.33639	0.563829
Zscan21	839.268	-0.335795	0.593632
Tbp	833.894	-0.333205	0.530757
Fiz1	367.58	-0.33312	0.50123
Smad4	1222.15	-0.333091	0.644644
Ddx5	13231.9	-0.33204	0.562142
Trp53	523.924	-0.327402	0.641662
Mdm4	2953.31	-0.321796	0.590323
Mafg	832.69	-0.32131	0.7234
Mdm2	1198.28	-0.320472	0.536484
Maz	1481.1	-0.317796	0.674191
Smarca4	9276.64	-0.312536	0.600349
Mllt1	1055.34	-0.31251	0.677662
Pou2f2	381.706	-0.311564	0.631497
Zfp397	1533.68	-0.306521	0.645449
Bptf	7986.63	-0.304508	0.528312
Crebbp	7693.9	-0.301542	0.635929
Pelp1	885.28	-0.291948	0.503072
Bach1	1011.66	-0.289021	0.689538
Kat2b	538.597	-0.28306	0.527676
Cnot1	4752.59	-0.278486	0.533665
Rbl1	763.773	-0.275898	0.613758
Cnot3	1608.85	-0.270315	0.555481
Nrf1	1128.53	-0.270271	0.62091
Rrn3	807.918	-0.266938	0.502751
Zfp280c	957.387	-0.266067	0.764835
Prdm15	701.474	-0.264734	0.551308
Zfp148	2347.81	-0.259737	0.540799
Akirin2	986.176	-0.258255	0.556754
Sap130	1651.84	-0.257062	0.685263
Mta1	1813.4	-0.253378	0.512179
Zmym2	2238.26	-0.252852	0.502859
Zfp335	664.166	-0.250463	0.526214
Ctbp1	1892.48	-0.249742	0.578447
Nelfcd	527.942	-0.2496	0.609804
Dnmt1	4900.47	-0.249542	0.55362
Arid4b	3397.76	-0.244905	0.599704
Mga	4123.05	-0.244139	0.534128
Bclaf1	5399.67	-0.243568	0.632324
Gatad2b	3219.64	-0.242524	0.701496
Hmgb1	8142.28	-0.227138	0.537354
Sox2	2403.67	-0.224406	0.731042
Arnt2	2929.84	-0.223186	0.754662
Sltm	4440.53	-0.222695	0.536426
Zbtb10	835.83	-0.221283	0.641147
Cdc73	1241.67	-0.216388	0.595792
Nfrkb	1091.91	-0.21434	0.555602
Kmt2d	10461.9	-0.212505	0.511496
Aff4	6189.77	-0.209882	0.581327
Bag1	1091.81	-0.207784	0.590092
Usp7	3476.38	-0.206237	0.534206
Mta2	1390.15	-0.206099	0.54242
Hsf2	1176.84	-0.200789	0.60638
Zfp131	1138.04	-0.191729	0.78298
Brwd1	3176.53	-0.189442	0.633633
Setx	2758.92	-0.187882	0.624962
Dnmt3a	3662.6	-0.186715	0.587111
Sox12	2005.93	-0.184542	0.536816
Cramp1l	1362.82	-0.18407	0.569003
Ikbkb	1079.92	-0.184003	0.56631
Sfpq	12164.8	-0.171068	0.604168
Ncoa6	2952.53	-0.163112	0.539505
Hsph1	2144.22	-0.156381	0.521881
Cand1	2382.72	-0.148808	0.572933
Sin3b	1351.11	-0.141467	0.505636
Rbm39	5312.19	-0.0828258	0.569935
Fer	1337.46	0.154334	0.551241
Nfe2l1	1525.82	0.165535	0.603114
Jak2	1550.55	0.190411	0.550849
Strap	1671.33	0.204552	0.553953
Chuk	1212.55	0.207022	0.569575
Agap2	3563.52	0.224494	0.509769
Psmc1	1455.55	0.224855	0.554801
Gabpa	995.113	0.232462	0.652818
Tle4	1380.41	0.238239	0.588368
Zfp318	2287.1	0.239924	0.514886
Tcf25	3140.23	0.240859	0.772844
Tfdp1	1439.12	0.260579	0.718588
Brd7	2062.31	0.262604	0.61032
Cbfb	698.058	0.267731	0.564884
Zfp945	924.642	0.273739	0.726217
Atf6b	517.437	0.2754	0.52622
Tsc22d1	4536.02	0.276617	0.681824
Zfp281	974.662	0.293836	0.62376
Cops2	1166.69	0.294364	0.533265
Bhlhb9	1218.79	0.295315	0.570827
Psmc3	1388.98	0.296193	0.599357
Zbtb4	660.411	0.309642	0.601532
Pdcd4	1572.03	0.310148	0.725725
L3mbtl2	469.702	0.311189	0.552179
Srebf2	3220.39	0.312937	0.627126
Map2k5	607.361	0.333505	0.570912
Maged1	8704.29	0.33387	0.523642
Zfp746	568.508	0.339964	0.620575
Hmg20b	315.317	0.349484	0.588425
Elk4	1139.06	0.350803	0.601405
Traf6	517.358	0.355133	0.543392
Zfp37	687.462	0.364587	0.528802
Smad5	3204.59	0.369352	0.676551
Zfp523	839.043	0.370957	0.645266
Xbp1	554.248	0.381364	0.671933
Cipc	838.928	0.383996	0.607318
Rfxap	368.625	0.388396	0.878935
Smarca2	4339.29	0.411242	0.576337
Ifrd1	367.251	0.422622	0.613021
Rela	582.969	0.432382	0.693041
Src	1441.74	0.437174	0.526686
Tcf12	3786.55	0.442777	0.623468
Vezf1	959.666	0.459743	0.524517
Skil	2008.82	0.464865	0.624321
Per2	542.761	0.482779	0.60422
Nrip1	1193.42	0.484495	0.555423
Satb1	1789.77	0.489479	0.519882
Zeb1	6138.34	0.493069	0.697138
Hif1a	2166.44	0.493985	0.665037
Smad3	537.355	0.499979	0.671246
Zfp827	2052.29	0.501332	0.552848
Axin2	870.963	0.502795	0.543735
Stat5b	480.445	0.509706	0.71639
Gatad2a	1365.72	0.51751	0.5724
Fubp3	1153.14	0.531695	0.544587
Cdk2	404.9	0.53303	0.522766
Sall2	1749.03	0.53523	0.627612
Thap7	101.348	0.536624	0.648251
Cux2	1328.86	0.545366	0.577449
Smad1	715.554	0.557015	0.740304
Zbtb1	864.954	0.558096	0.543917
Sox9	4215.56	0.558359	0.670006
Nfat5	3232.56	0.562311	0.687606
Klf6	687.99	0.565623	0.615944
Ybx3	1299.95	0.56636	0.630867
Trps1	1560.76	0.584351	0.576685
Tgfb1i1	267.14	0.593066	0.504535
Notch1	5809.4	0.600531	0.592078
Zbed3	427.521	0.601078	0.560355
Prdx5	354.79	0.604653	0.574615
Ebf4	354.76	0.606676	0.607327
Pknox2	993.385	0.609499	0.71693
Zfp791	66.1979	0.612971	0.586062
Rora	512.618	0.626007	0.731781
Hivep2	1586.08	0.641927	0.565372
Foxk1	695.655	0.647392	0.632085
Creb3l1	76.6703	0.650832	0.571462
Bola1	60.1829	0.657757	0.597726
Myc	413.762	0.659546	0.65357
Nab1	796.021	0.672137	0.702035
Zfp462	9378.69	0.689747	0.536335
Tsc22d4	524.88	0.691408	0.649911
Mbd2	594.928	0.694461	0.555586
Mapk7	987.291	0.702023	0.572447
Bola3	271.551	0.704403	0.513235
Ppargc1b	112.302	0.723787	0.551607
Zfp24	1409.66	0.740432	0.602182
Nfkbia	157.966	0.743817	0.600296
Irf2	527.747	0.755513	0.541486
Notch3	872.822	0.782274	0.542812
Npas2	114.035	0.785823	0.659695
Sox5	2129.51	0.794813	0.678791
Etv6	662.995	0.84203	0.714829
Arid5b	700.899	0.874991	0.68326
Elk3	327.829	0.885146	0.667782
Elf1	416.425	0.904348	0.656036
Nfkb1	625.556	0.905085	0.725485
Id2	339.978	0.923428	0.617658
Klf9	356.87	0.933095	0.65362
Cebpd	81.3321	0.940705	0.672213
Myt1	5634.89	0.94277	0.627405
Irf1	67.1717	0.968157	0.700181
Pgr	58.8567	1.00266	0.634984
Arhgap35	9133.19	1.00374	0.537811
Nr2f2	404.459	1.01342	0.652024
Egr3	266.353	1.03964	0.781762
Nfkbie	73.9115	1.08127	0.520453
Prdm5	255.867	1.08684	0.600558
Wwtr1	734.041	1.08722	0.597197
Relb	44.8081	1.08862	0.643713
Bcl6	131.95	1.10873	0.627301
Arntl2	57.6433	1.1151	0.566549
Zfpm2	701.393	1.13487	0.590708
Pik3r1	4933.97	1.1352	0.556554
Zfp423	733.904	1.13783	0.597078
Nr4a3	239.373	1.14638	0.741753
Phf19	155.315	1.14915	0.510829
Jdp2	170.198	1.1543	0.626179
Tcf7l1	226.277	1.15431	0.690248
Lrrfip1	1251.11	1.17454	0.50285
Hes5	127.82	1.20441	0.727277
Etv5	1414.87	1.21788	0.602236
Hey1	369.262	1.2404	0.685996
Grhl1	75.7891	1.25	0.639534
Creb5	936.739	1.26052	0.534975
Erf	430.324	1.28536	0.569133
Rel	106.244	1.29055	0.71012
Rreb1	444.257	1.29593	0.541301
Nfatc1	311.829	1.30248	0.670595
Mitf	90.6852	1.3077	0.678894
Irf7	30.8732	1.34556	0.613771
Creb3l2	653.977	1.3829	0.545035
Rfx4	954.727	1.42836	0.660385
Hey2	115.279	1.4436	0.671794
Bhlhe41	101.509	1.4441	0.598721
Maff	58.0328	1.46016	0.574478
Rest	685.47	1.46897	0.669708
Stat3	1095.53	1.48332	0.668528
Nr3c1	896.89	1.50924	0.609337
Ets2	424.092	1.52237	0.682384
Prrx1	514.996	1.52577	0.616448
Zbtb7c	126.598	1.55879	0.742896
Klf10	390.734	1.57096	0.709198
Trib2	2558.27	1.604	0.522615
Tal1	37.787	1.61914	0.673972
Zfp36l1	1436.06	1.62912	0.616584
Mkx	16.9632	1.63985	0.683703
Gsx1	185.895	1.67538	0.636753
Bhlhe40	348.013	1.6788	0.611988
Fhl2	55.8475	1.69058	0.593748
Mybl1	600.961	1.7152	0.619107
Cebpb	24.1437	1.72286	0.682975
Stat1	77.4527	1.73342	0.677975
Nfatc2	182.595	1.75448	0.680936
Tcf7l2	906.226	1.79174	0.684541
Eya1	453.146	1.81182	0.562523
Rarg	170.71	1.81974	0.686706
Nab2	316.016	1.82156	0.57121
Ppard	497.995	1.82555	0.618931
Hes1	161.88	1.82759	0.659405
Id1	80.661	1.84753	0.620598
Cdkn1c	107.513	1.86134	0.723043
Smad9	32.601	1.86464	0.749685
Sox6	4693.38	1.91233	0.734359
Stat6	103.565	1.94021	0.700761
Lmo1	72.6507	1.95116	0.652652
Tfeb	96.6123	2.01055	0.627433
Heyl	120.243	2.03602	0.742125
Npas3	1221.9	2.03854	0.569192
Ets1	925.183	2.09406	0.739118
Zic3	241.456	2.12395	0.627601
Id3	163.076	2.12974	0.646843
Klf4	119.819	2.15642	0.703775
Bcl6b	146.365	2.22543	0.824562
Six4	46.7189	2.28622	0.714556
Sox3	281.225	2.30542	0.568647
Sox8	3478.14	2.34847	0.714017
Ccnd1	907.032	2.38938	0.572647
Kcnip3	2532.78	2.42191	0.526608
Snai2	34.8597	2.47459	0.683231
Zfpm1	194.046	2.47821	0.628438
Sertad1	23.4521	2.51185	0.670062
Dab2	646.909	2.59148	0.529604
Fli1	206.69	2.72111	0.673807
Grhl2	94.0338	2.7258	0.555053
Prdm1	92.5331	2.7313	0.648512
Nr4a1	858.303	2.7463	1
Glis1	40.0224	2.82563	0.70758
Etv4	588.239	2.8532	0.608205
Klf2	176.487	2.92832	0.619092
Epas1	2063.38	2.98163	0.676887
Foxc1	135.996	3.02837	0.666074
Tcf7	224.074	3.03196	0.657005
Olig2	4770.01	3.05474	0.61692
Foxf1	10.4286	3.07459	0.690662
Lef1	186.263	3.11552	0.691918
Egr4	17.6187	3.15736	0.677552
Hic1	63.4318	3.3316	0.588849
Egr2	6.82589	3.59065	0.703047
Foxd1	5.77722	3.67989	0.688576
Olig1	3755.83	3.83414	0.582008
Foxs1	10.1179	3.85083	0.660933
Erg	224.977	4.03885	0.602268
Meox2	2.40636	4.15082	0.602032
Gata3	3.57729	4.20726	0.620036
Gata2	51.6715	4.38266	0.669541
Sox7	137.889	4.42068	0.637604
Tbx3	84.5425	4.43116	0.670748
Onecut3	3.74685	4.5325	0.641583
T	4.51238	4.54295	0.664932
Mecom	171.688	4.61728	0.637002
Foxb1	2.65982	4.82324	0.62777
Nkx2-2	421.384	4.89554	0.744807
En1	11.9987	4.90415	0.609579
Myrf	715.206	4.94724	0.605566
Sox18	83.0344	5.01809	0.691672
Meox1	53.8284	5.11889	0.564024
Hmga2	63.3514	5.37324	0.604157
Bcl3	4.48827	5.57324	0.646073
Barx2	22.5253	5.57766	0.682623
Npas1	481.383	5.61751	0.607115
Tbx1	37.3891	5.77581	0.771888
Sox10	3154.62	6.04128	0.670189
Ifi204	6.85819	6.1902	0.648641
Tead4	9.76532	6.19755	0.690282
Foxq1	35.9008	6.61476	0.616452
Sox17	67.646	6.70817	0.703981
Zfp488	820.75	6.82632	0.675331
Rbpjl	61.9701	7.19538	0.549086
Foxf2	161.372	7.88456	0.659743
Foxl2	24.6912	8.03586	0.622773

## Sheet: GO GEN NR4A1 GFP pos 0
	ONTOLOGY	ID	Description	GeneRatio	BgRatio	pvalue	p.adjust	qvalue	geneID	Count
GO:1901342	BP	GO:1901342	regulation of vasculature development	138/3832	340/23174	2.15558e-26	1.32482e-22	4.74458e-23	Adgrb3/Stat1/Cflar/Col4a3/Ptgs2/Cd34/Notch1/Eng/Aplnr/Creb3l1/Cd59a/Spred1/Dll4/Ism1/Id1/Ppp1r16b/Mmp9/Cd40/Ptgis/Nfatc2/Bmp7/Hey1/Rapgef2/Sfrp2/Efna1/S100a1/Ecm1/Rap1a/F3/Klf4/Tek/Tie1/Adgrb2/Epha2/Nos3/Emilin1/Fgfbp1/Kit/Kdr/Anxa3/Pxn/Gtf2i/Serpine1/Flt1/Stard13/Asb4/Tspan12/Ptn/Hipk2/Gata2/Adamts9/Plxnd1/Tnfrsf1a/Prkd2/Gpr4/Pak4/Emc10/Rras/Chrna7/Stim1/Adm/Pde3b/Pik3c2a/Prkcb/Adam12/Igf2/Col4a…	138
GO:0031589	BP	GO:0031589	cell-substrate adhesion	137/3832	337/23174	2.7243e-26	1.67435e-22	4.74458e-23	Fn1/Arpc2/Sned1/Bcl2/Lamc1/Itga8/Rsu1/Hacd1/Notch1/Itga6/Itga4/Itgav/Ptprj/Hsd17b12/Src/Prex1/Lama5/Fndc3b/Bcan/Efna1/Adam15/Csf1/Vcam1/Ccn1/Frem1/Tek/Tesk2/Col16a1/Hspg2/Vamp3/Emilin1/Limch1/Kdr/Pxn/Col26a1/Serpine1/Micall2/Rac1/Ptprz1/Ptn/Zyx/Mmrn1/Antxr1/Adamts9/Vwf/Ttyh1/Bcam/Actn4/Fzd4/Itgal/Dock1/Ccl25/Gas6/Angpt2/Adam9/Plekha2/Dlc1/Calr/Cdh13/Foxf1/Agt/Disc1/Nrp1/Itgb1/Col5a3/Dnm2/Jam3/Pea…	137
GO:0001667	BP	GO:0001667	ameboidal-type cell migration	152/3832	406/23174	1.38149e-24	8.49061e-21	1.60398e-21	Sox17/Fn1/Tns1/Ptgs2/Mia3/Gata3/Notch1/Pkn3/Dpp4/Itga4/Nckap1/Itgav/Prr5l/Spred1/Dll4/Sema6d/Src/Mmp9/Cd40/Bmp7/Edn3/Lama5/Efna1/Klf4/Epb41l4b/Tek/Cap1/Wasf2/Epha2/Plekhg5/Sema3d/Nos3/Fgfbp1/Kit/Kdr/Anxa3/Tgfbr3/Pxn/Scarb1/Serpine1/Gna12/Rac1/Stard13/Tac1/Gata2/Iqsec1/Adamts9/Plxnd1/Cxcl12/Ret/Strap/Prkd2/Tgfb1/Gpi1/Emc10/Nr2f2/Prcp/Pik3c2a/Dock1/Igf2/Angpt2/Adam9/Fgfr1/Adgra2/Hmox1/Gipc1/Calr/Cd…	152
GO:0090130	BP	GO:0090130	tissue migration	117/3832	284/23174	3.1939e-23	1.96297e-19	2.78122e-20	Ptgs2/Mia3/Gata3/Notch1/Pkn3/Dpp4/Itgav/Spred1/Dll4/Src/Mmp9/Cd40/Efna1/Klf4/Epb41l4b/Tek/Epha2/Plekhg5/Nos3/Fgfbp1/Kit/Kdr/Anxa3/Tgfbr3/Pxn/Scarb1/Serpine1/Stard13/Tac1/Gata2/Iqsec1/Adamts9/Plxnd1/Strap/Prkd2/Tgfb1/Gpi1/Emc10/Nr2f2/Prcp/Pik3c2a/Dock1/Igf2/Angpt2/Adam9/Fgfr1/Adgra2/Hmox1/Gipc1/Calr/Cdh13/Foxf1/Agt/Nrp1/Itgb1/Ets1/Dnaja4/Map2k5/Rab11a/Ctsh/Rhoa/Gpx1/Tgfbr2/Sash1/Tbxa2r/Ptprr/Atp5b…	117
GO:0045765	BP	GO:0045765	regulation of angiogenesis	122/3832	307/23174	1.53227e-22	9.41731e-19	1.06743e-19	Adgrb3/Stat1/Col4a3/Ptgs2/Cd34/Notch1/Eng/Aplnr/Creb3l1/Cd59a/Spred1/Dll4/Ism1/Id1/Ppp1r16b/Mmp9/Cd40/Ptgis/Sfrp2/Efna1/S100a1/Ecm1/F3/Klf4/Tek/Tie1/Adgrb2/Epha2/Nos3/Emilin1/Fgfbp1/Kdr/Anxa3/Pxn/Gtf2i/Serpine1/Flt1/Stard13/Tspan12/Ptn/Hipk2/Gata2/Adamts9/Plxnd1/Tnfrsf1a/Prkd2/Gpr4/Pak4/Emc10/Rras/Chrna7/Stim1/Adm/Pde3b/Pik3c2a/Prkcb/Adam12/Igf2/Col4a2/Angpt2/Adgra2/Klf2/Hmox1/Smad1/Hhip/Gab1/Cx3…	122
GO:0090132	BP	GO:0090132	epithelium migration	115/3832	282/23174	2.05976e-22	1.26593e-18	1.19574e-19	Ptgs2/Mia3/Gata3/Notch1/Pkn3/Dpp4/Itgav/Spred1/Dll4/Src/Mmp9/Cd40/Efna1/Klf4/Epb41l4b/Tek/Epha2/Plekhg5/Nos3/Fgfbp1/Kit/Kdr/Anxa3/Tgfbr3/Pxn/Scarb1/Serpine1/Stard13/Tac1/Gata2/Iqsec1/Adamts9/Plxnd1/Strap/Prkd2/Tgfb1/Gpi1/Emc10/Nr2f2/Prcp/Pik3c2a/Dock1/Igf2/Angpt2/Adam9/Fgfr1/Adgra2/Hmox1/Gipc1/Calr/Cdh13/Agt/Nrp1/Itgb1/Ets1/Dnaja4/Map2k5/Rab11a/Ctsh/Rhoa/Gpx1/Tgfbr2/Sash1/Tbxa2r/Ptprr/Atp5b/Cd63/…	115
GO:0010631	BP	GO:0010631	epithelial cell migration	114/3832	280/23174	3.67368e-22	2.25784e-18	1.828e-19	Ptgs2/Mia3/Gata3/Notch1/Pkn3/Dpp4/Itgav/Spred1/Dll4/Src/Mmp9/Cd40/Efna1/Klf4/Epb41l4b/Tek/Epha2/Plekhg5/Nos3/Fgfbp1/Kit/Kdr/Anxa3/Tgfbr3/Pxn/Scarb1/Serpine1/Stard13/Tac1/Gata2/Iqsec1/Adamts9/Plxnd1/Strap/Prkd2/Tgfb1/Gpi1/Emc10/Nr2f2/Prcp/Pik3c2a/Dock1/Igf2/Angpt2/Adam9/Fgfr1/Adgra2/Hmox1/Gipc1/Calr/Cdh13/Agt/Nrp1/Itgb1/Ets1/Dnaja4/Map2k5/Rab11a/Ctsh/Rhoa/Gpx1/Tgfbr2/Sash1/Tbxa2r/Ptprr/Atp5b/Cd63/…	114
GO:0009100	BP	GO:0009100	glycoprotein metabolic process	129/3832	337/23174	4.80296e-22	2.9519e-18	2.09118e-19	Arfgef1/B3gat2/Uggt1/Mgat4a/Chpf/Itm2c/B3gnt7/Ramp1/Neu4/Bcl2/Edem3/Soat1/Ncstn/St8sia6/St6galnac4/Galnt13/Slc4a10/Galnt3/Slc35c1/Ext2/Chst14/Plcb1/Rpn2/Sulf2/Serp1/Krtcap2/Man1a2/Col11a1/Extl2/Manba/Impad1/Fut9/Vcp/Erp44/Alg6/Tmem59/Pomgnt1/Ddost/Man2b2/Ugdh/Srd5a3/Tmem165/Lfng/C1galt1/St3gal5/Mogs/Gfpt1/Rpn1/Eogt/Csgalnact2/St8sia1/Fkrp/Dpy19l3/Pcsk6/Acan/Man2a2/Xylt1/Fut10/Aga/Galnt7/Spock3/Cs…	129
GO:0045785	BP	GO:0045785	positive regulation of cell adhesion	146/3832	410/23174	3.08155e-21	1.89392e-17	1.19261e-18	Fn1/Igfbp2/Arpc2/Itpkb/Hlx/Gata3/Prkcq/Rsu1/Hacd1/Dpp4/Itga6/Itga4/Itgav/Ptprj/Hsd17b12/Rag1/Traf6/Cd44/Rasgrp1/Src/Tgm2/Prex1/Bmp7/Csf1/Vav3/Vcam1/Lef1/Ccn1/Bcl10/Nr4a3/Epb41l4b/Tek/Col16a1/Ptpru/Rap1gap/Tnfrsf18/Emilin1/Kdr/Col26a1/Rac1/Cav1/Podxl/Ptn/Ephb6/Mmrn1/Dysf/Cxcl12/Ret/Cd4/Prkd2/Tgfb1/Il4ra/Spn/Itgal/Stx4a/Dock1/Igf2/Cd81/Ccl25/Adam9/Plekha2/Dusp26/Jak3/Calr/Cyld/Cx3cl1/Cbfb/Nfat5/Cdh…	146
GO:0043062	BP	GO:0043062	extracellular structure organization	122/3832	317/23174	3.76646e-21	2.31486e-17	1.31192e-18	Col19a1/Cflar/Fn1/Acsl3/Col4a3/Lamc1/Qsox1/Soat1/Tnr/Mia3/Cd34/Itga8/Notch1/Adamtsl2/Col5a1/Eng/Dpp4/Creb3l1/Hsd17b12/Pltp/Mmp9/Sulf2/Bmp7/Col9a3/Sfrp2/Col11a1/Col24a1/Ccn1/Sdcbp/Mmp16/Col9a2/Col8a2/Col16a1/Hspg2/Tnfrsf1b/Plod1/Vwa1/Emilin1/Mpv17/Apbb2/Pdgfra/Scarb1/Mmp17/Eln/Col28a1/Loxl3/Antxr1/Adamts9/Tnfrsf1a/Bcl3/Tgfb1/Hpn/Gas2/Acan/Serpinh1/Col4a1/Col4a2/Csgalnact1/Colgalt1/Mmp2/Mmp15/Atxn1…	122
GO:0042063	BP	GO:0042063	gliogenesis	122/3832	321/23174	1.2818e-20	7.87793e-17	4.05882e-18	Nab1/Fn1/Serpine2/Dner/Gpr37l1/Ncstn/Kcnj10/Vim/Grin1/Notch1/Mir219a-2/Lrp2/Ptprj/Ptpra/Nkx2-2/Nkx2-2os/Dusp15/Prkci/S100a8/S100a9/Cers2/Tspan2/Csf1/Mettl14/Lef1/Lyn/Ufl1/Cdkn2b/Ror1/Lepr/Dab1/Tal1/Eif2b3/Hdac1/Tnfrsf1b/Hes5/Adam22/Eif2b4/Fgfr3/Wdr1/Areg/Wasf3/Ptprz1/Ptn/Sox5/Mboat7/Tgfb1/Dll3/Sirt2/Mag/Ntrk3/Sox6/Arhgef10/Cx3cl1/Il34/Fa2h/Agt/Disc1/Ldlr/Lingo1/Cspg4/Map2k1/Trf/Dag1/Rhoa/Epm2a/Ad…	122
GO:0030198	BP	GO:0030198	extracellular matrix organization	109/3832	273/23174	1.80596e-20	1.10994e-16	5.24204e-18	Col19a1/Cflar/Fn1/Col4a3/Lamc1/Qsox1/Tnr/Mia3/Itga8/Notch1/Adamtsl2/Col5a1/Eng/Dpp4/Creb3l1/Hsd17b12/Mmp9/Sulf2/Col9a3/Sfrp2/Col11a1/Col24a1/Ccn1/Mmp16/Col9a2/Col8a2/Col16a1/Hspg2/Tnfrsf1b/Plod1/Vwa1/Emilin1/Mpv17/Apbb2/Pdgfra/Mmp17/Eln/Col28a1/Loxl3/Antxr1/Adamts9/Tnfrsf1a/Bcl3/Tgfb1/Hpn/Gas2/Acan/Serpinh1/Col4a1/Col4a2/Csgalnact1/Colgalt1/Mmp2/Mmp15/Atxn1l/Foxf1/Agt/Itgb1/Mmp8/Col5a3/Aplp2/Ets1…	109
GO:0034330	BP	GO:0034330	cell junction organization	102/3832	251/23174	6.66134e-20	4.09406e-16	1.78481e-17	Dst/Abi2/Fn1/Tns1/Cdh20/Bcl2/Nfasc/Inava/Lamc1/Pkp4/Itgav/Ptprj/Src/Cdh22/Prkci/Rapgef2/Rhoc/Rap1a/Ugt8a/Tln1/Tek/Tesk2/Col16a1/Cdc42/Epha2/Wdr1/Limch1/Kdr/Trpv4/Pxn/Micall2/Rac1/Cav1/Iqsec1/Cd9/Ptpro/Rassf8/Tgfb1/Actn4/Lsr/Dlc1/Prkaca/Kifc3/Cdh11/Cdh5/Cdh3/Cdh13/Agt/Nrp1/Itgb1/Rdx/Peak1/Smad3/Rhoa/Pdcd6ip/Ptprk/Gja1/Lims1/Lrp1/Pmp22/Myo1c/Vmp1/Cntnap1/Ramp2/Dusp3/Ace/Rock2/Grhl1/Arf6/Prkch/Mpp5/…	102
GO:0034329	BP	GO:0034329	cell junction assembly	88/3832	203/23174	1.57762e-19	9.69607e-16	3.92508e-17	Dst/Abi2/Fn1/Tns1/Cdh20/Bcl2/Nfasc/Lamc1/Pkp4/Itgav/Ptprj/Src/Cdh22/Rapgef2/Rhoc/Rap1a/Ugt8a/Tln1/Tek/Tesk2/Col16a1/Epha2/Wdr1/Limch1/Kdr/Trpv4/Pxn/Micall2/Rac1/Cav1/Cd9/Ptpro/Actn4/Lsr/Dlc1/Prkaca/Cdh11/Cdh5/Cdh3/Cdh13/Agt/Nrp1/Itgb1/Peak1/Smad3/Rhoa/Pdcd6ip/Ptprk/Gja1/Lims1/Lrp1/Pmp22/Myo1c/Vmp1/Cntnap1/Ramp2/Dusp3/Ace/Rock2/Prkch/Mpp5/Actn1/Dusp22/Ocln/Marveld2/Vcl/Fermt2/Gjb2/Cdh6/Cdh10/Cdh18…	88
GO:0010810	BP	GO:0010810	regulation of cell-substrate adhesion	88/3832	210/23174	2.23459e-18	1.37338e-14	5.18896e-16	Fn1/Arpc2/Bcl2/Rsu1/Hacd1/Notch1/Itga6/Ptprj/Hsd17b12/Src/Prex1/Adam15/Csf1/Ccn1/Tek/Col16a1/Emilin1/Limch1/Kdr/Col26a1/Serpine1/Rac1/Ptprz1/Ptn/Mmrn1/Actn4/Fzd4/Dock1/Ccl25/Angpt2/Plekha2/Dlc1/Calr/Cdh13/Foxf1/Disc1/Nrp1/Itgb1/Dnm2/Peak1/Smad3/Pik3cb/Dag1/Rhoa/Utrn/Lims1/Spock2/Lrp1/Emid1/Vwc2/C1qbp/Vtn/Nf1/Dusp3/Smoc1/Net1/Nid1/Dusp22/Rreb1/Edil3/Pik3r1/Mmrn2/Dock5/Dab2/Egflam/Enpp2/Has2/Ptk2/A…	88
GO:0072511	BP	GO:0072511	divalent inorganic cation transport	155/3832	476/23174	3.31662e-18	2.0384e-14	7.2202e-16	Slc40a1/Slc39a10/Ramp1/Bcl2/Tmem37/Tmem163/Slc41a1/Atp2b4/Ptgs2/Tmco1/Atp1a2/Slc30a1/Slc39a12/Grin1/Itgav/Calcrl/Aplnr/Ryr3/Slc30a4/Prnp/Plcb1/Slc24a3/Fkbp1a/Chrna4/Oprl1/Trpc3/Slc39a1/S100a1/Slc30a7/Slc39a8/Lyn/Chd7/Asph/Grin3a/Bspry/Pde4b/Zmpste24/Gja4/Epb41/Slc9a1/Selenon/Nipal3/Sri/Nos3/Htt/Wfs1/Stim2/Nipal1/Tmem165/Pkd2/Iscu/Trpv4/Atp2a2/P2rx7/Orai1/Nipsnap2/Serpine1/Cav1/Adcyap1r1/Snca/Dysf…	155
GO:0070838	BP	GO:0070838	divalent metal ion transport	154/3832	473/23174	4.33133e-18	2.66204e-14	8.87454e-16	Slc40a1/Slc39a10/Ramp1/Bcl2/Tmem37/Tmem163/Slc41a1/Atp2b4/Ptgs2/Tmco1/Atp1a2/Slc30a1/Slc39a12/Grin1/Itgav/Calcrl/Aplnr/Ryr3/Slc30a4/Prnp/Plcb1/Slc24a3/Fkbp1a/Chrna4/Oprl1/Trpc3/Slc39a1/S100a1/Slc30a7/Slc39a8/Lyn/Chd7/Asph/Grin3a/Bspry/Pde4b/Zmpste24/Gja4/Epb41/Slc9a1/Selenon/Nipal3/Sri/Nos3/Htt/Wfs1/Stim2/Nipal1/Tmem165/Pkd2/Iscu/Trpv4/Atp2a2/P2rx7/Orai1/Nipsnap2/Serpine1/Cav1/Adcyap1r1/Snca/Dysf…	154
GO:0010001	BP	GO:0010001	glial cell differentiation	94/3832	236/23174	9.16521e-18	5.63294e-14	1.64974e-15	Nab1/Serpine2/Dner/Gpr37l1/Ncstn/Kcnj10/Vim/Notch1/Mir219a-2/Ptprj/Ptpra/Nkx2-2/Nkx2-2os/Dusp15/S100a8/S100a9/Tspan2/Mettl14/Lef1/Ror1/Dab1/Tal1/Eif2b3/Hdac1/Tnfrsf1b/Hes5/Adam22/Eif2b4/Fgfr3/Wdr1/Wasf3/Ptprz1/Ptn/Sox5/Tgfb1/Dll3/Sirt2/Mag/Ntrk3/Sox6/Arhgef10/Il34/Fa2h/Agt/Ldlr/Lingo1/Map2k1/Dag1/Rhoa/Adgrg6/Egr2/Zfp365/Hmga2/Lrp1/Nab2/Erbb3/Egfr/Pmp22/Vtn/Nf1/Omg/Nog/Nfe2l1/Cnp/Stat3/Cntnap1/Sox…	94
GO:0050808	BP	GO:0050808	synapse organization	147/3832	447/23174	9.28768e-18	5.70821e-14	1.64974e-15	Adgrb3/Abi2/Dock10/Rab29/Nfasc/Tnr/Dnm3/C1ql3/Grin1/Tanc1/Lrrc4c/Prnp/Rims4/Nlgn1/Mfn1/Slc7a11/Slitrk3/Glrb/Bcan/Efna1/Lingo4/Pdlim5/Sdcbp/Vcp/Ptprd/Adgrb2/Wasf2/Cdc42/Igsf21/Clstn1/Rer1/Agrn/Adgrl3/Sparcl1/Sez6l/Cux2/Fzd9/Ache/Elfn1/Sdk1/Wasf3/Cttnbp2/Lrrc4/Ptn/Snca/Grid2/Lrrtm4/Lrrn1/Camk1/Plxnd1/Lrtm2/Clstn3/Ptpro/Caprin2/Shisa7/Dmpk/Lrrc4b/Chrna7/Ntrk3/Mesd/Grm5/Col4a1/Gpm6a/Ncan/Adgre5/Cacna…	147
GO:0010632	BP	GO:0010632	regulation of epithelial cell migration	91/3832	225/23174	9.47265e-18	5.82189e-14	1.64974e-15	Ptgs2/Gata3/Notch1/Spred1/Dll4/Src/Mmp9/Cd40/Efna1/Klf4/Epb41l4b/Tek/Epha2/Nos3/Fgfbp1/Kdr/Anxa3/Tgfbr3/Serpine1/Stard13/Tac1/Gata2/Iqsec1/Adamts9/Strap/Prkd2/Tgfb1/Gpi1/Emc10/Nr2f2/Prcp/Pik3c2a/Dock1/Igf2/Angpt2/Adam9/Fgfr1/Adgra2/Hmox1/Calr/Agt/Nrp1/Ets1/Dnaja4/Map2k5/Rab11a/Ctsh/Rhoa/Tgfbr2/Sash1/Tbxa2r/Ptprr/Atp5b/Cd63/Flt4/Il4/Sparc/Adora2b/Pfn1/Nf1/Sox9/Rock2/Adam17/Meox2/Arf6/Hif1a/Rhoj/Rr…	91
GO:0050803	BP	GO:0050803	regulation of synapse structure or activity	104/3832	275/23174	1.32886e-17	8.16716e-14	2.20411e-15	Adgrb3/Abi2/Dnm3/C1ql3/Grin1/Dnm1/Tanc1/Prnp/Rims4/Nlgn1/Mfn1/Slc7a11/Slitrk3/Efna1/Lingo4/Pdlim5/Vcp/Ptprd/Adgrb2/Cdc42/Clstn1/Agrn/Adgrl3/Sparcl1/Cux2/Fzd9/Cttnbp2/Ptn/Snca/Grid2/Lrrtm4/Lrrn1/Camk1/Lrtm2/Clstn3/Ptpro/Caprin2/Shisa7/Dmpk/Lrrc4b/Chrna7/Ntrk3/Mesd/Gpm6a/Ncan/Adgre5/Disc1/Dnm2/Adam10/Snap91/Dag1/Rhoa/Fyn/Srgn/Lrrtm3/Abhd17a/Sparc/Arhgap44/Shisa6/Ntn1/Arhgef15/Nlgn2/Asic2/Nptx1/Baia…	104
GO:0006898	BP	GO:0006898	receptor-mediated endocytosis	90/3832	223/23174	1.68178e-17	1.03362e-13	2.66269e-15	Smap1/Lmbrd1/Ackr3/Ramp1/Dnm3/Dnm1/Lrp2/Itga4/Calcrl/Ldlrad3/B2m/Gria2/Syt11/Sdcbp/Eps15/Ppt1/Cap1/Rspo1/Ldlrap1/Hspg2/Lrpap1/Ankrd13a/Hip1r/Hip1/Serpine1/Ache/Cav2/Cav1/Snca/Aak1/Iqsec1/Cd9/Clec9a/Bicd1/Sirt2/Ptpn5/Sh3gl3/Fchsd2/Adm/Ifitm3/Cd81/Msr1/Necab2/Itgb1/Dnm2/Ldlr/Cbl/Snx1/Anxa2/Myo6/Snap91/Trf/Tgfbr2/Syne1/Wasf1/Lrp1/Atp5b/Cd63/Egfr/Canx/Kif3a/Il4/Scarf1/Vtn/Cltc/Hap1/Ramp2/Arhgap27/Nsf…	90
GO:0050807	BP	GO:0050807	regulation of synapse organization	101/3832	265/23174	2.08902e-17	1.28391e-13	3.16364e-15	Adgrb3/Abi2/Dnm3/C1ql3/Grin1/Tanc1/Prnp/Rims4/Nlgn1/Mfn1/Slc7a11/Slitrk3/Efna1/Lingo4/Pdlim5/Vcp/Ptprd/Adgrb2/Cdc42/Clstn1/Agrn/Adgrl3/Sparcl1/Cux2/Fzd9/Cttnbp2/Ptn/Snca/Grid2/Lrrtm4/Lrrn1/Camk1/Lrtm2/Clstn3/Ptpro/Caprin2/Shisa7/Dmpk/Lrrc4b/Chrna7/Ntrk3/Mesd/Gpm6a/Ncan/Adgre5/Disc1/Adam10/Snap91/Dag1/Rhoa/Fyn/Srgn/Lrrtm3/Abhd17a/Sparc/Arhgap44/Shisa6/Ntn1/Arhgef15/Nlgn2/Asic2/Nptx1/Baiap2/Lrfn5/M…	101
GO:0007264	BP	GO:0007264	small GTPase mediated signal transduction	155/3832	485/23174	2.28187e-17	1.40244e-13	3.31171e-15	Arfgef1/Arhgef4/Abi2/Dock10/Farp2/Ralb/Rab29/Rgl1/Chml/Itpkb/Rsu1/Notch1/Rab14/Dennd1a/Nckap1/Arhgap1/Rasgrp1/Usp8/Src/Prex1/Spry1/Rap2b/Rapgef2/Cdc42se1/Rhoc/Rap1a/Csf1/Gpsm2/Vav3/Ssx2ip/Sdcbp/Rab2a/Ctnnal1/Dab1/Dhcr24/Wasf2/Cdc42/Rap1gap/Arhgef10l/Plekhg5/Arhgap24/Gna12/Mmd2/Rac1/Arhgef5/Adcyap1r1/Rtkn/Rab7/Iqsec1/Fgd5/Rerg/Eps8/Arhgap35/Gpr4/Cadm4/Rasgrp4/Rras/Rasip1/Akap13/Rab38/Rab6a/Rhog/Rr…	155
GO:0009101	BP	GO:0009101	glycoprotein biosynthetic process	104/3832	277/23174	2.40594e-17	1.47869e-13	3.35211e-15	Arfgef1/B3gat2/Uggt1/Mgat4a/Chpf/Itm2c/B3gnt7/Ramp1/Bcl2/Soat1/Ncstn/St8sia6/St6galnac4/Galnt13/Slc4a10/Galnt3/Slc35c1/Ext2/Chst14/Plcb1/Rpn2/Serp1/Krtcap2/Extl2/Fut9/Vcp/Alg6/Tmem59/Pomgnt1/Ddost/Ugdh/Srd5a3/Tmem165/Lfng/C1galt1/St3gal5/Mogs/Gfpt1/Rpn1/Eogt/Csgalnact2/St8sia1/Fkrp/Dpy19l3/Acan/Xylt1/Fut10/Galnt7/Csgalnact1/Jak3/B3gnt3/Necab2/Dpy19l1/B3gat1/Stt3a/Mpi/Glce/Lipc/Stt3b/Dse/Chst3/Pof…	104
GO:0090287	BP	GO:0090287	regulation of cellular response to growth factor stimulus	101/3832	267/23174	3.81706e-17	2.34596e-13	5.11362e-15	Cflar/Gata3/Itga8/Notch1/Adamtsl2/Eng/Hspa5/Lrp2/Creb3l1/Cd59a/Fbn1/Sulf2/Pmepa1/Skil/Spry1/Sfrp2/Ccn1/Sdcbp/Cdkn2b/Tek/Hes5/Emilin1/Htra3/Fgfbp1/Kdr/Tgfbr3/Fgfrl1/Flt1/Cav2/Cav1/Kcp/Hipk2/Strap/Prkd2/Cadm4/Tgfb1/Furin/Fzd4/Prkcb/Tgfb1i1/Htra1/Fgfr1/Adgra2/Snx25/Hhip/Gipc1/Zfp423/Glg1/Agt/Dnm2/Neo1/Smad3/Snx1/Cd109/Wasf1/Vsir/Chst11/Cd63/Xbp1/Vwc2/Grb10/Cyfip2/Epn2/Myo1c/Nog/Adam17/Sostdc1/Hif1a/…	101
GO:0003013	BP	GO:0003013	circulatory system process	155/3832	489/23174	5.24211e-17	3.2218e-13	6.76263e-15	Stat1/Per2/Atp2b4/Adora1/Gpr37l1/Tnnt2/Ptgs2/F5/F11r/Atp1a2/Cd34/Eng/Scn1a/Stk39/Ptprj/Src/Gnas/Edn3/Oprl1/Wwtr1/Npr1/S100a1/Atp1a1/Kcnd3/Rap1gds1/Chd7/Pde4b/Zmpste24/Slc9a1/Cdc42/Ece1/Agrn/Sri/Nos3/Drd5/Cd38/Kdr/Tgfbr3/Trpv4/Atp2a2/Tac1/Cav1/Mgll/Hrh1/Wnk1/Kcna5/Ptpro/Kcnj8/Arhgap35/Dmpk/Tgfb1/Trpm4/Hrc/Nav2/Chrna7/Nr2f2/Akap13/Nox4/Prcp/P2ry2/Adm/Mrvi1/Glrx3/Kcnq1/Gas6/Adrb3/Sgcz/Hmox1/Ednra/Mm…	155
GO:0043542	BP	GO:0043542	endothelial cell migration	82/3832	198/23174	7.38963e-17	4.54167e-13	9.19259e-15	Ptgs2/Mia3/Gata3/Notch1/Dpp4/Itgav/Spred1/Dll4/Cd40/Efna1/Klf4/Tek/Epha2/Plekhg5/Nos3/Fgfbp1/Kdr/Anxa3/Pxn/Scarb1/Stard13/Gata2/Adamts9/Plxnd1/Prkd2/Tgfb1/Gpi1/Emc10/Nr2f2/Prcp/Pik3c2a/Igf2/Angpt2/Fgfr1/Adgra2/Hmox1/Gipc1/Calr/Cdh13/Agt/Nrp1/Itgb1/Ets1/Dnaja4/Map2k5/Rhoa/Gpx1/Sash1/Tbxa2r/Atp5b/Flt4/Sparc/Adora2b/Nf1/Pecam1/Rock2/Adam17/Meox2/Clec14a/Hif1a/Rhoj/Lgals8/Mmrn2/Bmp4/Egr3/Rgcc/Sema5a/…	82
GO:1904018	BP	GO:1904018	positive regulation of vasculature development	83/3832	204/23174	1.69182e-16	1.03979e-12	2.03203e-14	Cflar/Ptgs2/Cd34/Notch1/Eng/Aplnr/Ppp1r16b/Mmp9/Cd40/Ptgis/Rapgef2/Sfrp2/S100a1/Ecm1/Rap1a/F3/Klf4/Tek/Tie1/Nos3/Fgfbp1/Kit/Kdr/Anxa3/Pxn/Serpine1/Flt1/Asb4/Hipk2/Gata2/Tnfrsf1a/Prkd2/Pak4/Emc10/Rras/Chrna7/Stim1/Adm/Pik3c2a/Prkcb/Adam12/Igf2/Angpt2/Hmox1/Smad1/Gab1/Cx3cl1/Cdh5/Nrp1/Itgb1/Pdgfd/Ets1/Pkm/Ctsh/Tgfbr2/Sash1/Tbxa2r/Hmga2/Xbp1/Pik3r6/Tmem100/Stat3/Ramp2/Hif1a/Rhoj/Itgb8/Agtr1a/Erap1/C…	83
GO:0007272	BP	GO:0007272	ensheathment of neurons	71/3832	162/23174	2.4286e-16	1.49262e-12	2.72877e-14	Nab1/Nfasc/Ncstn/Kcnj10/Mir219a-2/Mal/Mall/Atrn/Bcas1/Cldn11/Tspan2/Ugt8a/Tnfrsf1b/Hes5/Adam22/Eif2b4/Fgfr3/Gjc3/Wasf3/Ptprz1/Ptn/Eif2ak3/Cd9/Tgfb1/Sirt2/Mag/Ntrk3/Ctsc/Acer3/Arhgef10/Pllp/Fa2h/Jam3/Hexa/Myo5a/Trf/Dag1/Cmtm8/Adgrg6/Fyn/Egr2/S100b/Nab2/Gal3st1/Pmp22/Nf1/Omg/Cntnap1/Mpp5/Slc8a3/Galc/Zscan26/Serinc5/Zfp488/Sox10/Rarg/Cldn5/Dlg1/Olig2/Qk/Ppard/Tnfrsf21/Zfp24/Sh3tc2/Mbp/Myrf/2700046G0…	71
GO:0008366	BP	GO:0008366	axon ensheathment	71/3832	162/23174	2.4286e-16	1.49262e-12	2.72877e-14	Nab1/Nfasc/Ncstn/Kcnj10/Mir219a-2/Mal/Mall/Atrn/Bcas1/Cldn11/Tspan2/Ugt8a/Tnfrsf1b/Hes5/Adam22/Eif2b4/Fgfr3/Gjc3/Wasf3/Ptprz1/Ptn/Eif2ak3/Cd9/Tgfb1/Sirt2/Mag/Ntrk3/Ctsc/Acer3/Arhgef10/Pllp/Fa2h/Jam3/Hexa/Myo5a/Trf/Dag1/Cmtm8/Adgrg6/Fyn/Egr2/S100b/Nab2/Gal3st1/Pmp22/Nf1/Omg/Cntnap1/Mpp5/Slc8a3/Galc/Zscan26/Serinc5/Zfp488/Sox10/Rarg/Cldn5/Dlg1/Olig2/Qk/Ppard/Tnfrsf21/Zfp24/Sh3tc2/Mbp/Myrf/2700046G0…	71
GO:0071900	BP	GO:0071900	regulation of protein serine/threonine kinase activity	137/3832	425/23174	7.64618e-16	4.69934e-12	8.32277e-14	Ccnyl1/Ralb/Atp2b4/Adora1/Inava/Stk39/Dusp19/Ptprj/Traf6/Hipk3/Spred1/Rasgrp1/Dusp2/Src/Cd40/Bmp7/Edn3/Tnik/Spry1/Rapgef2/Sfrp2/Gba/Synpo2/Lyn/Cdkn2b/Sesn2/Htt/Kit/Pkd2/Pxn/Taok3/Sh2b3/P2rx7/Fzd10/Pdgfa/Flt1/Cav1/Arhgef5/Snca/Gadd45a/Tgfa/Camk1/Ret/Dusp16/Tgfb1/Spred3/Ccne1/Rasip1/Ptpn5/Chrna7/Nr2f2/Akap13/Ntrk3/Nox4/Grm5/Fzd4/Inppl1/Smpd1/Bccip/Cd81/Ccnd1/Adam9/Fgfr1/Acsl1/Gab1/Mlkl/Agt/Pdgfd/Ti…	137
GO:0007015	BP	GO:0007015	actin filament organization	131/3832	400/23174	8.21765e-16	5.05057e-12	8.67375e-14	Arfgef1/Tmeff2/Abi2/Arpc2/Bcl2/Tnnt2/Fam171a1/Prkcq/Nebl/Aif1l/Gsn/Wipf1/Nckap1/Id1/Src/Prex1/Prkci/Rhoc/Synpo2/Tmod1/Kank4/Cap1/Wasf2/Asap3/Cdc42/Arhgef10l/Wdr1/Limch1/Trpv4/Pxn/Arpc3/Hip1r/Eln/Hip1/Micall2/Rac1/Arpc1b/Tac1/Cald1/Zyx/Arhgef5/Eps8/Arhgap35/Vasp/Actn4/Nphs1/Arpin/Nox4/Fchsd2/Arap1/Inppl1/Rhog/Swap70/Arhgap17/Arhgef10/Dlc1/Fat1/Pdlim3/Tpm4/Cx3cl1/Nrp1/Icam1/Rdx/Pstpip1/Smad3/Tpm1/C…	131
GO:0042552	BP	GO:0042552	myelination	69/3832	159/23174	1.18386e-15	7.27599e-12	1.21281e-13	Nab1/Nfasc/Ncstn/Kcnj10/Mir219a-2/Mal/Mall/Atrn/Bcas1/Tspan2/Ugt8a/Tnfrsf1b/Hes5/Adam22/Eif2b4/Fgfr3/Gjc3/Wasf3/Ptprz1/Ptn/Eif2ak3/Cd9/Tgfb1/Sirt2/Mag/Ntrk3/Ctsc/Acer3/Arhgef10/Pllp/Fa2h/Jam3/Hexa/Myo5a/Trf/Dag1/Cmtm8/Adgrg6/Fyn/Egr2/S100b/Nab2/Gal3st1/Pmp22/Nf1/Omg/Cntnap1/Mpp5/Slc8a3/Galc/Zscan26/Serinc5/Zfp488/Sox10/Rarg/Cldn5/Dlg1/Olig2/Qk/Tnfrsf21/Zfp24/Sh3tc2/Mbp/Myrf/2700046G09Rik/Marveld1…	69
GO:0008015	BP	GO:0008015	blood circulation	149/3832	479/23174	1.28532e-15	7.89957e-12	1.27913e-13	Stat1/Per2/Atp2b4/Adora1/Gpr37l1/Tnnt2/Ptgs2/F5/F11r/Atp1a2/Cd34/Eng/Scn1a/Stk39/Ptprj/Gnas/Edn3/Oprl1/Npr1/S100a1/Atp1a1/Kcnd3/Rap1gds1/Chd7/Pde4b/Zmpste24/Slc9a1/Cdc42/Ece1/Agrn/Sri/Nos3/Drd5/Cd38/Kdr/Tgfbr3/Trpv4/Atp2a2/Tac1/Cav1/Mgll/Hrh1/Wnk1/Kcna5/Ptpro/Kcnj8/Arhgap35/Dmpk/Tgfb1/Trpm4/Hrc/Nav2/Chrna7/Nr2f2/Prcp/P2ry2/Adm/Mrvi1/Glrx3/Kcnq1/Gas6/Adrb3/Sgcz/Hmox1/Ednra/Mmp2/Cx3cl1/Agt/Icam1/Fl…	149
GO:0048709	BP	GO:0048709	oligodendrocyte differentiation	52/3832	103/23174	1.82771e-15	1.12331e-11	1.76839e-13	Ncstn/Kcnj10/Notch1/Mir219a-2/Ptprj/Ptpra/Nkx2-2/Nkx2-2os/Dusp15/Tspan2/Eif2b3/Hdac1/Tnfrsf1b/Hes5/Eif2b4/Fgfr3/Wdr1/Wasf3/Ptprz1/Ptn/Sox5/Tgfb1/Sirt2/Mag/Sox6/Il34/Fa2h/Lingo1/Dag1/Zfp365/Vtn/Nf1/Omg/Cnp/Cntnap1/Sox9/Id2/Slc8a3/Zfp488/Bmp4/Enpp2/Sox10/Hes1/Olig2/Olig1/Qk/Sox8/Tnfrsf21/Myrf/Tcf7l2/Nlgn3/Plp1	52
GO:0010811	BP	GO:0010811	positive regulation of cell-substrate adhesion	59/3832	126/23174	2.03264e-15	1.24926e-11	1.91352e-13	Fn1/Arpc2/Rsu1/Hacd1/Itga6/Ptprj/Hsd17b12/Prex1/Csf1/Ccn1/Tek/Col16a1/Emilin1/Kdr/Col26a1/Rac1/Ptn/Mmrn1/Dock1/Ccl25/Plekha2/Calr/Cdh13/Foxf1/Disc1/Nrp1/Itgb1/Dnm2/Smad3/Dag1/Utrn/Lims1/Spock2/Emid1/Vwc2/C1qbp/Vtn/Smoc1/Net1/Nid1/Rreb1/Edil3/Mmrn2/Dock5/Dab2/Egflam/Enpp2/Has2/Itga5/Ppm1f/Crkl/Col8a1/Vegfa/Emilin2/Vit/Lims2/Pcsk5/Jak2/Dmd	59
GO:0098742	BP	GO:0098742	cell-cell adhesion via plasma-membrane adhesion molecules	80/3832	202/23174	3.6118e-15	2.21981e-11	3.31065e-13	Cdh20/Hmcn1/Ccdc141/Itga4/Lrrc4c/Ptprt/Cdh22/Nlgn1/Fat4/Pcdh10/Slitrk3/Vcam1/Klf4/Ptprd/Dab1/Igsf21/Clstn1/Adgrl3/Anxa3/Sparcl1/Fgfrl1/Sdk1/Lrrc4/Grid2/Cntn6/Ret/Wnk1/Clstn3/Nectin2/Pvr/Mag/Lrrc4b/Itgal/Cx3cl1/Cdh11/Cdh5/Cdh3/Cdh13/Fat3/Igsf9b/Esam/Mcam/Map2k5/Prtg/Pik3cb/Tgfbr2/Cd164/Pcdh15/Bsg/Fat2/Mapk7/Lgals9/Pecam1/Lrfn5/Mdga2/Emb/Cdhr1/Pcdh17/Pcdh20/Slitrk1/Cdh6/Cdh10/Cdh18/Itga5/Arvcf/Il1r…	80
GO:0060562	BP	GO:0060562	epithelial tube morphogenesis	124/3832	378/23174	4.22605e-15	2.59733e-11	3.77436e-13	Sox17/Eya1/Casp8/Wnt6/Bcl2/Gata3/Nrarp/Notch1/Eng/Lrp2/Nckap1/Traf6/Cd44/Dll4/Src/Bmp7/Lama5/Hey1/Spry1/Fat4/Sfrp2/Csf1/Lef1/Bcl10/Tek/Luzp1/Epha2/Hes5/Cc2d2a/Pdgfra/Kdr/Areg/Pkd2/Pxn/Tbx3/Tmed2/Flt1/Stard13/Plxnd1/Cxcl12/Ret/Mgp/Arhgap35/Vasp/Tgfb1/Rasip1/Adm/Col4a1/Dlc1/Gatad2a/Ednra/Hhip/Prkaca/Irx3/Foxf1/Agt/Nrp1/Pgr/Smad3/Ctsh/Nphp3/Dag1/Rhoa/Tgfbr2/Mthfd1l/Gja1/Lgr5/Hmga2/Cobl/Kif3a/Ntn1/Pf…	124
GO:0010959	BP	GO:0010959	regulation of metal ion transport	133/3832	419/23174	7.77704e-15	4.77977e-11	6.77217e-13	Hecw2/Serpine2/Bcl2/Dpp10/Atp2b4/Adora1/Ptgs2/Atp1a2/Rgs7/Slc30a1/Grin1/Stom/Stk39/Aplnr/Lrrc55/B2m/Kcnip3/Prnp/Plcb1/Fkbp1a/Gnas/Edn3/Oprl1/Trpc3/S100a1/Atp1a1/Lyn/Chd7/Asph/Nkain3/Slc31a2/Pde4b/Epb41/Slc9a1/Selenon/Agrn/Sri/Nos3/Dpp6/Htt/Wfs1/Stim2/Pkd2/Iscu/P2rx7/Orai1/Nipsnap2/Serpine1/Cav1/Adcyap1r1/Snca/Dysf/Itpr1/Cxcl12/Wnk1/Cd4/Kcna5/Kcna1/Cracr2a/Dmpk/Tgfb1/Fxyd5/Hrc/Homer2/Stim1/Pik3c2a…	133
GO:0002040	BP	GO:0002040	sprouting angiogenesis	55/3832	116/23174	9.2137e-15	5.66274e-11	7.8275e-13	Ptgs2/Mia3/Nrarp/Notch1/Aplnr/Creb3l1/Spred1/Dll4/Ppp1r16b/S100a1/Lef1/Klf4/Tek/Cdc42/Epha2/Fgfbp1/Kdr/Flt1/Stard13/Gata2/Adamts9/Pik3c2a/Adgra2/Klf2/Hmox1/Smad1/Cdh13/Nrp1/Itgb1/Pkm/Map2k5/Rhoa/Tbxa2r/Flt4/Epn2/Ramp2/Jmjd6/Rnf213/Meox2/Clec14a/Rhoj/Agtr1a/Esm1/Mmrn2/Bmp4/Egr3/Sema5a/Card10/Nr4a1/Itga5/Dll1/Vegfa/Jcad/Sema6a/Anxa1	55
GO:0007160	BP	GO:0007160	cell-matrix adhesion	79/3832	203/23174	1.66773e-14	1.02499e-10	1.38309e-12	Fn1/Sned1/Bcl2/Itga8/Itga6/Itga4/Itgav/Ptprj/Src/Bcan/Adam15/Csf1/Vcam1/Frem1/Tek/Tesk2/Col16a1/Emilin1/Limch1/Kdr/Pxn/Serpine1/Rac1/Zyx/Adamts9/Bcam/Itgal/Ccl25/Adam9/Plekha2/Dlc1/Cdh13/Agt/Disc1/Nrp1/Itgb1/Col5a3/Jam3/Peak1/Smad3/Pik3cb/Dag1/Rhoa/Utrn/Ccn2/Ptprk/Lims1/Lrp1/Cd63/Vtn/Nf1/Dusp3/Pecam1/Actn1/Itgb8/Nid1/Epdr1/Dusp22/Pik3r1/Itga1/Nid2/Fermt2/Adamts12/Enpp2/Ptk2/Acvrl1/Ppm1f/Bcl6/Apod…	79
GO:0045766	BP	GO:0045766	positive regulation of angiogenesis	74/3832	185/23174	2.09127e-14	1.2853e-10	1.69401e-12	Ptgs2/Cd34/Eng/Aplnr/Ppp1r16b/Mmp9/Cd40/Ptgis/Sfrp2/S100a1/Ecm1/F3/Klf4/Tek/Tie1/Nos3/Fgfbp1/Kdr/Anxa3/Pxn/Serpine1/Flt1/Hipk2/Gata2/Tnfrsf1a/Prkd2/Pak4/Emc10/Rras/Chrna7/Stim1/Adm/Pik3c2a/Prkcb/Adam12/Igf2/Angpt2/Hmox1/Smad1/Gab1/Cx3cl1/Cdh5/Nrp1/Itgb1/Ets1/Pkm/Ctsh/Tgfbr2/Sash1/Tbxa2r/Hmga2/Xbp1/Pik3r6/Stat3/Ramp2/Hif1a/Rhoj/Itgb8/Agtr1a/Erap1/Cysltr2/Sema5a/Mtdh/Rapgef3/Acvrl1/Itga5/Dll1/Notch…	74
GO:0050673	BP	GO:0050673	epithelial cell proliferation	133/3832	424/23174	2.15276e-14	1.32309e-10	1.70418e-12	Eya1/Stat1/Cflar/Ptprn/Ncstn/Cd34/Gata3/Nrarp/Notch1/Egfl7/Eng/Itga4/Aplnr/Dll4/Id1/Ppp1r16b/Srsf6/Sulf2/Cebpb/Hey1/Sfrp2/Ecm1/F3/Nr4a3/Cdkn2b/Tek/Col8a2/Rps6ka1/Cdc42/Rap1gap/Epha2/Errfi1/Hes5/Fgfr3/Fgfbp1/Kit/Kdr/Areg/Tgfbr3/Scarb1/Flt1/Cav2/Cav1/Ptn/Dysf/Tgfa/Gata2/Itpr1/Cxcl12/Strap/Prkd2/Tgfb1/Hpn/Emc10/Nr2f2/Htra1/Igf2/Ccnd1/Fgfr1/Hmox1/Ednra/Cdh3/Cdh13/Wfdc1/Pgr/Map2k5/Smad3/Map2k1/Cd109/P…	133
GO:0007265	BP	GO:0007265	Ras protein signal transduction	130/3832	414/23174	3.87749e-14	2.38311e-10	3.00131e-12	Arfgef1/Arhgef4/Abi2/Farp2/Ralb/Rab29/Itpkb/Rsu1/Notch1/Rab14/Dennd1a/Nckap1/Rasgrp1/Usp8/Prex1/Spry1/Rap2b/Rapgef2/Cdc42se1/Rhoc/Rap1a/Csf1/Gpsm2/Vav3/Ssx2ip/Sdcbp/Rab2a/Ctnnal1/Dhcr24/Wasf2/Cdc42/Arhgef10l/Plekhg5/Arhgap24/Gna12/Mmd2/Rac1/Arhgef5/Rtkn/Rab7/Iqsec1/Fgd5/Rerg/Eps8/Arhgap35/Gpr4/Cadm4/Rasgrp4/Rras/Rasip1/Akap13/Rab38/Rab6a/Rhog/Rras2/Rasa3/Arhgef10/Dlc1/Fbxo8/Psd3/Ednra/Ripor1/Cdh1…	130
GO:1990778	BP	GO:1990778	protein localization to cell periphery	113/3832	342/23174	3.99731e-14	2.45675e-10	3.02679e-12	Acsl3/Pid1/Ramp1/Dpp10/Rab29/Nfasc/Blzf1/F11r/Ppp2r5a/Optn/Gpr158/Grin1/Sapcd2/Gorasp2/Snap23/Kcnip3/Mal/Prnp/Kcnb1/Lama5/Tnik/Prkci/Rapgef2/Rap1a/Gpsm2/Dennd4c/Tmem59/Epb41/Ldlrap1/Epha2/Clstn1/Vamp3/Rer1/Adam22/Dpp6/Prkg2/Rilpl1/Cnpy4/Rac1/Nptx2/Vamp5/Vamp8/Rtkn/Tnfrsf1a/Ehd2/Tgfb1/Plekhf1/Sytl2/Rhog/Tub/Stx4a/Cd81/Gas6/Ank1/Golga7/Itgb1/Rdx/Ptpn9/Map2k1/Rab11a/Anxa2/Adam10/Myo5a/Dag1/Epm2a/Map…	113
GO:0072001	BP	GO:0072001	renal system development	103/3832	302/23174	5.49928e-14	3.37985e-10	4.0755e-12	Sox17/Eya1/Stat1/Cflar/Wnt6/Col4a3/Bcl2/Gata3/Itga8/Notch1/Itga6/Cd44/Cat/Fbn1/Mmp9/Sulf2/Bmp7/Lama5/Hey1/Mecom/Spry1/Fat4/Smad9/Wwtr1/Tiparp/Aph1a/Tek/Zmpste24/Heyl/Id3/Hes5/Mpv17/Wfs1/Pdgfra/Pkd2/Mmp17/Pdgfa/C1galt1/Sec61a1/Ret/Ptpro/Gpr4/Tgfb1/Tshz3/Cdkn1c/Col4a1/Angpt2/Fgfr1/Ednra/Smad1/Irx3/Foxf1/Agt/Nrp1/Pdgfd/Stra6/Smad3/Nphp3/Sgpl1/Arid5b/Lgr5/Kif3a/Nf1/Nog/Wnk4/Ace/Sox9/Jmjd6/Cys1/Id2/Si…	103
GO:0061448	BP	GO:0061448	connective tissue development	98/3832	282/23174	6.01308e-14	3.69564e-10	4.36344e-12	Cflar/Prrx1/Mia3/Notch1/Col5a1/Frzb/Ddrgk1/Matn4/Sulf2/Bmp7/Gnas/Adrm1/Col20a1/Tbl1xr1/Smad9/Sfrp2/Lmna/Ecm1/Csf1/Col11a1/Ccn1/Impad1/Zmpste24/Matn1/Hspg2/Hes5/Vwa1/Fgfr3/Tapt1/Trpv4/Creb3l2/Creb5/Eif2ak3/Mgp/Sox5/Gpr4/Tgfb1/Trpm4/Acan/Dgat2/Serpinh1/Sox6/Fgfr1/Csgalnact1/Smad1/Glg1/Pdgfd/Snx19/Barx2/Sik3/Smad3/Anxa2/Col12a1/Pth1r/Tgfbr2/Ccn2/Arid5b/Col6a2/Col6a1/Chst11/Hmga2/Selenom/Xbp1/Efemp1/…	98
GO:0006816	BP	GO:0006816	calcium ion transport	132/3832	425/23174	6.19729e-14	3.80885e-10	4.40533e-12	Ramp1/Bcl2/Tmem37/Atp2b4/Ptgs2/Tmco1/Atp1a2/Slc30a1/Grin1/Itgav/Calcrl/Aplnr/Ryr3/Prnp/Plcb1/Slc24a3/Fkbp1a/Chrna4/Oprl1/Trpc3/S100a1/Lyn/Chd7/Asph/Grin3a/Bspry/Pde4b/Zmpste24/Gja4/Epb41/Slc9a1/Selenon/Sri/Nos3/Htt/Wfs1/Stim2/Tmem165/Pkd2/Trpv4/Atp2a2/P2rx7/Orai1/Nipsnap2/Serpine1/Cav1/Adcyap1r1/Snca/Dysf/Itpr1/Hrh1/Cxcl12/Cd4/Cracr2a/Itpr2/Slc8a2/Tgfb1/Trpm4/Hrc/Chrna7/Homer2/Stim1/Prkcb/Gas6/Sa…	132
GO:0008360	BP	GO:0008360	regulation of cell shape	63/3832	149/23174	8.7591e-14	5.38334e-10	6.10187e-12	Fn1/Fam171a1/Fmnl2/S100a13/Cdc42se1/Rhoc/Palmd/Zmpste24/Epb41/Fgr/Cdc42/Wdr1/Kit/Kdr/Pxn/Gna12/Wasf3/Strip2/Ptn/Plxnd1/Eps8/Arhgap35/Hpn/Myh14/Gas2/Arap1/Rhog/Aldoa/Dlc1/Icam1/Rdx/Rhoa/Limd1/Epb41l2/Arhgap18/Fyn/S100b/Itga7/Kif3a/Rnd2/Slc9a3r1/Baiap2/Arhgdia/Rhoj/Sema4d/Fermt2/Myo10/Ptk2/Myh9/Cdc42ep1/Parvb/Fmnl3/Tbccd1/Dlg1/Vegfa/Myl12a/Rhoq/Arap3/Rhod/Anxa1/Dnmbp/Plxnb3/Msn	63
GO:0034765	BP	GO:0034765	regulation of ion transmembrane transport	141/3832	468/23174	1.23186e-13	7.57101e-10	8.41326e-12	Kcnq5/Hecw2/Per2/Sept2/Tmem37/Dpp10/Atp2b4/Atp1a2/Kcnj10/Rgs7/Slc30a1/Stom/Scn1a/Stk39/Aplnr/Lrrc55/Kcnip3/Prnp/Plcb1/Fkbp1a/Mmp9/Kcnb1/Edn3/Chrna4/Oprl1/Nlgn1/S100a1/Kcnd3/Kcna2/Kcnc4/Lyn/Chd7/Asph/Slc31a2/Pde4b/Zmpste24/Slc9a1/Selenon/Agrn/Sri/Abcb1a/Dpp6/Htt/Wdr1/Stim2/Anxa3/Pkd2/Iscu/P2rx7/Nipsnap2/Cav1/Kcnd2/Tcaf2/Snca/Dysf/Wnk1/Kcna5/Kcna1/Kcna6/Cracr2a/Kcnj8/Shisa7/Tgfb1/Fxyd5/Kcnc3/Grm5/S…	141
GO:0034976	BP	GO:0034976	response to endoplasmic reticulum stress	84/3832	229/23174	1.25609e-13	7.71994e-10	8.41378e-12	Uggt1/Bcl2/Ubxn4/Ppp1r15b/Fam129a/Edem3/Tmco1/Tor1a/Hspa5/Gorasp2/Dnajc10/Creb3l1/Eif2ak4/Pdia3/Ddrgk1/Cebpb/Vapb/Usp13/Serp1/Dnajb14/Ufl1/Vcp/Erp44/Ecpas/Txndc12/Sesn2/Wfs1/Creb3l2/Pdia4/Eif2ak3/Aup1/Itpr1/Erp27/Rcn3/Svip/Selenos/Ccnd1/Erlin2/Ubxn8/Amfr/Hyou1/Scamp5/Parp16/Rasgrf1/Nck1/Uba5/Manf/Stt3b/Map3k5/Dnajb12/Hsp90b1/Os9/Xbp1/Pmp22/Sdf2/Rnft1/Trim25/Nfe2l1/Ccdc47/P4hb/Dnajb9/Tmx1/Eif2s1/P…	84
GO:0032970	BP	GO:0032970	regulation of actin filament-based process	123/3832	390/23174	1.3337e-13	8.19692e-10	8.76507e-12	Arfgef1/Tmeff2/Abi2/Arpc2/Adora1/Tnnt2/F11r/Atp1a2/Prkcq/Gsn/Nckap1/Id1/Prex1/Atp1a1/Rhoc/Synpo2/Tmod1/Tek/Kank4/Pde4b/Fgr/Wasf2/Asap3/Cdc42/Arhgef10l/Sri/Wdr1/Limch1/Pxn/Arpc3/Atp2a2/Hip1r/Fzd10/Eln/Rac1/Arpc1b/Tac1/Cav1/Arhgef5/Eps8/Arhgap35/Vasp/Tgfb1/Nphs1/Trpm4/Akap13/Ntrk3/Arpin/Nox4/Fchsd2/Arap1/Rhog/Swap70/Arhgap17/Arhgef10/Dlc1/Bst2/Cx3cl1/Nrp1/Icam1/Jam3/Rdx/Smad3/Tpm1/Nck1/Rhoa/Ccn2/Ar…	123
GO:0043405	BP	GO:0043405	regulation of MAP kinase activity	100/3832	295/23174	1.96317e-13	1.20656e-09	1.2663e-11	Adora1/Inava/Stk39/Dusp19/Ptprj/Traf6/Hipk3/Spred1/Rasgrp1/Dusp2/Src/Cd40/Bmp7/Edn3/Tnik/Spry1/Sfrp2/Gba/Lyn/Kit/Pxn/Taok3/Sh2b3/P2rx7/Fzd10/Pdgfa/Flt1/Cav1/Arhgef5/Gadd45a/Tgfa/Ret/Dusp16/Tgfb1/Spred3/Ptpn5/Chrna7/Akap13/Ntrk3/Nox4/Grm5/Fzd4/Inppl1/Smpd1/Cd81/Adam9/Fgfr1/Gab1/Mlkl/Pdgfd/Tirap/Cspg4/Map2k5/Map2k1/Trf/Dusp7/Sash1/Map3k5/Tpd52l1/Shc2/Dusp6/Egfr/Spred2/Mapk7/Pik3r6/Nf1/Spag9/Dusp3/T…	100
GO:0007162	BP	GO:0007162	negative regulation of cell adhesion	97/3832	283/23174	2.10538e-13	1.29397e-09	1.33334e-11	Serpine2/Tnr/Mia3/Hlx/Nrarp/Notch1/Cd44/Prnp/Ccm2l/Src/Cebpb/Adam15/Lef1/Klf4/Dab1/Trpv4/Sh2b3/Serpine1/Mad1l1/Ptprz1/Podxl/Gpnmb/Loxl3/Plxnd1/Cxcl12/Wnk1/Cd9/Tgfb1/Actn4/Fzd4/Lrrc32/Swap70/Pde3b/Il4ra/Spn/Ccl25/Angpt2/Dlc1/Jak3/Cyld/Mmp2/Cbfb/Cdh13/Rdx/Cd276/Map2k5/Map2k1/Adam10/Il20rb/Rhoa/Vsir/Lrp1/Atp5b/Erbb3/Peli1/Il4/Irf1/Mapk7/Lgals9/Nf1/Dusp3/Lamb1/Hfe/Dusp22/Sema4d/Pik3r1/Bmp4/Rgcc/Sema5…	97
GO:0042326	BP	GO:0042326	negative regulation of phosphorylation	136/3832	451/23174	3.11494e-13	1.91444e-09	1.93747e-11	Pid1/Phlpp1/Ppp1r15b/Fam129a/Ppp2r5a/Eng/Stk39/Dnajc10/Dusp19/Ptprj/Mtch2/Prr5l/Hipk3/Spred1/Dusp2/Prnp/Rassf2/Fkbp1a/Ptprt/Dbndd2/Bmp7/Pmepa1/Mecom/Spry1/Wwtr1/E130311K13Rik/Sfrp2/Gba/Efna1/Cdc42se1/Lyn/Klf4/Cdkn2b/Cep85/Errfi1/Emilin1/Zfyve28/Drd5/Dynll1/Taok3/Sh2b3/P2rx7/Cav1/Snca/Gadd45a/Wnk1/Dusp16/Strap/Cadm4/Tgfb1/Sirt2/Spred3/Rasip1/Ptpn5/Chrna7/Lrrk1/Nr2f2/Ntrk3/Inppl1/Smpd1/Cdkn1c/Irs2/…	136
GO:2001233	BP	GO:2001233	regulation of apoptotic signaling pathway	127/3832	412/23174	3.38528e-13	2.08059e-09	2.06868e-11	Sgk3/Eya1/Tmem14a/Cflar/Casp8/Itm2c/Ackr3/Bcl2/Inhbb/Steap3/Ptgs2/Pea15a/G0s2/Gsn/Itga6/Itgav/Mtch2/Ndufs3/Creb3l1/Cd44/Pdia3/Mal/Src/Mmp9/Tnfsf10/Skil/Siah2/Sfrp2/Lmna/S100a8/S100a9/Bcl10/Txndc12/Hdac1/Slc35f6/Htt/Wfs1/Hip1r/Serpine1/Cav1/Gsdme/Eif2ak3/Cxcl12/Ret/Ltbr/Ybx3/Plaur/Pdcd5/Plekhf1/Selenos/Ctsc/Stx4a/Tnfrsf22/Fgfr1/Ndufa13/Jak3/Hmox1/Cyld/Cx3cl1/Agt/Nrp1/Icam1/Hyou1/Ppp2r1b/Map2k5/Sma…	127
GO:0050678	BP	GO:0050678	regulation of epithelial cell proliferation	114/3832	357/23174	4.14893e-13	2.54993e-09	2.49161e-11	Eya1/Stat1/Cflar/Ptprn/Gata3/Nrarp/Notch1/Egfl7/Eng/Itga4/Aplnr/Dll4/Id1/Ppp1r16b/Srsf6/Sulf2/Hey1/Sfrp2/Ecm1/F3/Nr4a3/Cdkn2b/Tek/Cdc42/Rap1gap/Errfi1/Hes5/Fgfr3/Fgfbp1/Kdr/Tgfbr3/Flt1/Cav2/Cav1/Ptn/Dysf/Tgfa/Gata2/Itpr1/Cxcl12/Strap/Prkd2/Tgfb1/Hpn/Emc10/Nr2f2/Htra1/Igf2/Ccnd1/Fgfr1/Hmox1/Ednra/Cdh3/Cdh13/Wfdc1/Pgr/Map2k5/Smad3/Cd109/Gpx1/Ptprk/Gja1/Lims1/Hmga2/Agap2/Xbp1/Egfr/Flt4/Kif3a/Sparc/A…	114
GO:0033674	BP	GO:0033674	positive regulation of kinase activity	141/3832	475/23174	4.34019e-13	2.66748e-09	2.5623e-11	Ccnyl1/Ralb/Pfkfb2/Atp2b4/Adora1/Inava/Stk39/Dusp19/Traf6/Cd44/Rasgrp1/Prnp/Rassf2/Src/Cd40/Edn3/Tnik/Rapgef2/Efna1/Rap1a/Csf1/Vav3/Ccn1/Lyn/Nbn/Tek/Dab1/Tal1/Fgr/Cdc42/Agrn/Fgfr3/Pdgfra/Kit/Pkd2/Pxn/Taok3/P2rx7/Fzd10/Pdgfa/Mmd2/Rac1/Flt1/Arhgef5/Snca/Gadd45a/Tgfa/Camk1/Ret/Cd4/Tgfb1/Pak4/Chrna7/Akap13/Ntrk3/Nox4/Grm5/Fzd4/Cd81/Ccnd1/Gas6/Adam9/Fgfr1/Acsl1/Gab1/Mlkl/Agt/Pdgfd/Tirap/Il18/Cspg4/Map…	141
GO:0072503	BP	GO:0072503	cellular divalent inorganic cation homeostasis	146/3832	498/23174	4.86681e-13	2.99114e-09	2.82531e-11	Slc39a10/Ackr3/Bcl2/Slc41a1/Atp2b4/Tmco1/Atp1a2/Slc30a1/Slc39a12/Grin1/Itgav/Aplnr/Ryr3/Slc30a4/Prnp/Plcb1/Slc24a3/Fkbp1a/Tgm2/Cd40/Vapb/Edn3/Oprl1/Trpc3/Selenot/Slc30a7/Slc39a8/Rap1gds1/Lyn/Chd7/Asph/Selenon/Clstn1/Sri/Htt/Wfs1/Cd38/Stim2/Pdgfra/Kdr/Tmem165/Pkd2/Cmklr1/Trpv4/Atp2a2/P2rx7/Gtf2i/Fzd9/Tac1/Cav1/Adcyap1r1/Snca/Immt/Gata2/Itpr1/Cd4/Kcna5/Itpr2/Slc8a2/Dmpk/Gpr4/Tgfb1/Trpm4/Hrc/Chrna7/…	146
GO:0010634	BP	GO:0010634	positive regulation of epithelial cell migration	60/3832	143/23174	5.07228e-13	3.11742e-09	2.89632e-11	Ptgs2/Gata3/Src/Mmp9/Cd40/Epb41l4b/Tek/Nos3/Fgfbp1/Kdr/Anxa3/Serpine1/Tac1/Gata2/Iqsec1/Prkd2/Tgfb1/Gpi1/Emc10/Pik3c2a/Dock1/Igf2/Adam9/Fgfr1/Adgra2/Hmox1/Calr/Agt/Nrp1/Ets1/Rab11a/Ctsh/Tgfbr2/Sash1/Atp5b/Flt4/Sparc/Adora2b/Pfn1/Sox9/Rock2/Adam17/Arf6/Hif1a/Rhoj/Rreb1/Bmp4/Dock5/Sema5a/Enpp2/Has2/Pdgfb/Snai2/Ppm1f/Vegfa/Jcad/Hbegf/Ccbe1/Atp5a1/Anxa1	60
GO:0014013	BP	GO:0014013	regulation of gliogenesis	63/3832	154/23174	5.31682e-13	3.26772e-09	2.98699e-11	Serpine2/Gpr37l1/Vim/Grin1/Notch1/Mir219a-2/Lrp2/Ptpra/Nkx2-2/Nkx2-2os/Dusp15/Prkci/Cers2/Csf1/Lyn/Ufl1/Cdkn2b/Dab1/Hdac1/Tnfrsf1b/Hes5/Fgfr3/Wdr1/Ptprz1/Ptn/Tgfb1/Dll3/Sirt2/Mag/Ntrk3/Il34/Ldlr/Lingo1/Trf/Dag1/Zfp365/Hmga2/Lrp1/Efemp1/Pmp22/Nf1/Nog/Id2/Prkch/Il6st/Zcchc24/Zfp488/Bmp4/Enpp2/Myc/Ptk2/Sox10/Crkl/Etv5/Hes1/App/Synj1/Olig2/Qk/Sox8/Tnfrsf21/Rela/Tcf7l2	63
GO:0001655	BP	GO:0001655	urogenital system development	111/3832	346/23174	6.0144e-13	3.69645e-09	3.32526e-11	Sox17/Eya1/Stat1/Cflar/Wnt6/Col4a3/Bcl2/Gata3/Itga8/Notch1/Itga6/Cd44/Cat/Fbn1/Mmp9/Sulf2/Bmp7/Lama5/Hey1/Mecom/Spry1/Fat4/Smad9/Wwtr1/Tiparp/Aph1a/Tek/Zmpste24/Heyl/Id3/Hes5/Mpv17/Wfs1/Pdgfra/Pkd2/Mmp17/Pdgfa/C1galt1/Gata2/Sec61a1/Ret/Ptpro/Gpr4/Plaur/Tgfb1/Tshz3/Cdkn1c/Col4a1/Angpt2/Fgfr1/Ednra/Smad1/Irx3/Mmp2/Foxf1/Agt/Nrp1/Pdgfd/Stra6/Smad3/Foxb1/Nphp3/Sgpl1/Arid5b/Lgr5/Kif3a/Nf1/Nog/Wnk4/Ace…	111
GO:0003158	BP	GO:0003158	endothelium development	53/3832	119/23174	6.59484e-13	4.05319e-09	3.5892e-11	Sox17/Slc40a1/F11r/Notch1/Eng/Dll4/Id1/Ppp1r16b/Sox18/Hey1/Arhgef26/Rapgef2/Rap1a/Abcb1b/Kdr/Stard13/Tnfrsf1a/Apold1/Tjp1/Nr2f2/Cdh5/Agt/S1pr2/Icam1/Rdx/Anxa2/Rhoa/Gpx1/Hey2/Col18a1/Vezf1/Tmem100/Pecam1/Fasn/Rock2/F2rl1/Marveld2/Bmp4/Adamts12/Pdgfb/Wnt7b/Rapgef3/Acvrl1/Cldn5/Dll1/Notch4/Csnk2b/Vegfa/Xdh/Zeb1/Tjp2/Dmd/Msn	53
GO:0010256	BP	GO:0010256	endomembrane system organization	119/3832	381/23174	6.97281e-13	4.28549e-09	3.73652e-11	Arfgef1/Tram2/Tmeff2/Cavin2/Ptprn/Serpine2/Agfg1/Rab29/Camsap2/Tor1aip2/Blzf1/Mia3/Rab3gap2/Optn/Surf4/Col5a1/Tor1b/Tor1a/Dnm1/Gsn/Gorasp2/Ano3/Cdan1/Atp8b4/Usp8/Vapb/Fat4/Lmna/Syt11/S100a9/Mfsd14a/Rab2a/Stx17/Plk3/Zmpste24/Cdc42/Agrn/Htt/Sec31a/Tmed5/Atp2a2/P2rx7/Tmed2/Stx2/Cav2/Cav1/Eif2ak3/Dysf/Sec61a1/Tmf1/Jagn1/Ehd2/Dmpk/Nectin2/Plekhf1/Rab38/Arl6ip1/Hook3/Trappc11/Kifc3/Fa2h/Dnm2/Tmed1/Snx1…	119
GO:0006732	BP	GO:0006732	coenzyme metabolic process	106/3832	326/23174	7.71751e-13	4.74318e-09	4.07292e-11	Rpe/Pfkfb2/Nmnat2/Coq8a/Hsd11b1/Sardh/Gpd2/Mtch2/Slc23a2/Acss1/Nudt17/Ggh/Vcp/Hmgcl/Pgd/Nmnat1/H6pd/Crot/Acacb/Mvk/P2rx7/Mdh2/Foxk1/Ahcyl2/Bpgm/Snca/Suclg1/Spr/Aldh1l1/Suclg2/Tpi1/Ndufa9/Far2/Gpi1/Aspdh/Ldha/Folh1/Dgat2/Far1/Aldoa/Taldo1/Ido2/Acsl1/Pgls/Coq9/Nudt7/Mlycd/Mvd/Idh3a/Mpi/Adpgk/Pkm/Me1/Gpd1l/Mthfd1l/Pcbd1/Pfkl/Pdxk/Shmt2/Coq10a/Ogdh/Mdh1/Pank3/Stat3/Fasn/Dld/Nampt/Mbip/Hif1a/Mthfd1/Gp…	106
GO:0001822	BP	GO:0001822	kidney development	95/3832	281/23174	9.33469e-13	5.7371e-09	4.85286e-11	Eya1/Cflar/Wnt6/Col4a3/Bcl2/Gata3/Itga8/Notch1/Cd44/Cat/Fbn1/Mmp9/Sulf2/Bmp7/Lama5/Hey1/Spry1/Fat4/Smad9/Wwtr1/Tiparp/Aph1a/Tek/Zmpste24/Heyl/Id3/Hes5/Mpv17/Wfs1/Pdgfra/Pkd2/Mmp17/Pdgfa/C1galt1/Sec61a1/Ret/Ptpro/Gpr4/Tgfb1/Tshz3/Cdkn1c/Angpt2/Fgfr1/Ednra/Smad1/Irx3/Agt/Nrp1/Pdgfd/Stra6/Smad3/Nphp3/Sgpl1/Arid5b/Kif3a/Nf1/Nog/Wnk4/Ace/Sox9/Jmjd6/Cys1/Id2/Six4/Nid1/Agtr1a/Foxc1/Smad5/Klhl3/Adamts16/…	95
GO:0001570	BP	GO:0001570	vasculogenesis	45/3832	93/23174	9.84694e-13	6.05193e-09	5.04389e-11	Sox17/Ackr3/Cd34/Notch1/Egfl7/Eng/Aplnr/Ptprj/Spred1/Sox18/Hey1/Tiparp/Rapgef2/Rap1a/Tek/Tie1/Epha2/Kdr/Tgfbr3/Asb4/Cav1/Tgfb1/Rasip1/Fzd4/Adm/Fgfr1/Foxf1/Nrp1/Epor/Tgfbr2/Hey2/Sgpl1/Tmem100/Ramp2/Zfp36l1/Itgb8/Zfpm2/Has2/Ptk2/Wnt7b/T/Qk/Xdh/Zfp950/Cited1	45
GO:0009611	BP	GO:0009611	response to wounding	144/3832	495/23174	1.34712e-12	8.27937e-09	6.80031e-11	Arfgef1/Dst/Tmeff2/Cflar/Fn1/Serpine2/Bcl2/Tnr/F5/Mia3/Cd34/Prkcq/Col5a1/Tor1a/Eng/Tfpi/Rtn4rl2/Ptprj/Cd44/Thbd/Ccm2l/Procr/Srsf6/Matn4/Sulf2/Gnas/Slc7a11/Igsf10/Rap2b/Pear1/Syt11/S100a9/Cers2/Stxbp3/F3/Ccn1/Lyn/Klf4/Epb41l4b/Akirin1/Selenon/Nmnat1/AI506816/Fgfr3/Drd5/Tec/Pdgfra/Arhgap24/Sh2b3/Fzd9/Serpine1/Pdgfa/Cav1/Ptn/Mmrn1/Dysf/Adipor2/Cd9/Vwf/Fgfr1op2/Arhgap35/Gpr4/Cadm4/Tgfb1/Mag/Ntrk3/Abh…	144
GO:0010594	BP	GO:0010594	regulation of endothelial cell migration	63/3832	157/23174	1.48627e-12	9.13461e-09	7.39559e-11	Ptgs2/Gata3/Notch1/Spred1/Dll4/Cd40/Efna1/Klf4/Tek/Epha2/Nos3/Fgfbp1/Kdr/Anxa3/Stard13/Gata2/Adamts9/Prkd2/Tgfb1/Gpi1/Emc10/Nr2f2/Prcp/Pik3c2a/Igf2/Angpt2/Fgfr1/Adgra2/Hmox1/Calr/Agt/Nrp1/Ets1/Dnaja4/Map2k5/Rhoa/Sash1/Tbxa2r/Atp5b/Flt4/Sparc/Adora2b/Nf1/Rock2/Adam17/Meox2/Hif1a/Rhoj/Mmrn2/Bmp4/Rgcc/Sema5a/Adgrb1/Card10/Pdgfb/Acvrl1/Snai2/Csnk2b/Vegfa/Jcad/Ccbe1/Atp5a1/Anxa1	63
GO:0019693	BP	GO:0019693	ribose phosphate metabolic process	132/3832	444/23174	2.15178e-12	1.32249e-08	1.05563e-10	Ndufs1/Rpe/Pid1/Pfkfb2/Adcy10/Ndufs2/Atp1a2/Hsd11b1/Ndufa8/Mtch2/Acss1/Mfn1/Npr1/Papss1/Ak5/Vcp/Ak4/Hmgcl/Epha2/Pgd/Nmnat1/H6pd/Crot/Nudt9/Iscu/Acacb/Mvk/P2rx7/Nipsnap2/Foxk1/Impdh1/Bpgm/Cycs/Snca/Suclg1/Suclg2/Tpi1/Far2/Tgfb1/Gpi1/Ldha/Dgat2/Ampd3/Far1/Aldoa/Taldo1/Acsl1/Pgls/Coq9/Nudt7/Mlycd/Mvd/Sdhd/Mpi/Adpgk/Pkm/Map2k1/Clpx/Rora/Nt5e/Rhoa/Uqcrc1/Enpp1/Enpp3/Pfkl/Shmt2/Atp5b/Uqcr10/Ogdh/Pank3/…	132
GO:0071560	BP	GO:0071560	cellular response to transforming growth factor beta stimulus	75/3832	204/23174	2.22039e-12	1.36465e-08	1.07416e-10	Cflar/Itga8/Adamtsl2/Eng/Hspa5/Fbn1/Dusp15/Src/Pmepa1/Skil/Smad9/Sdcbp/Cdkn2b/Nos3/Emilin1/Yes1/Htra3/Tgfbr3/Pxn/Serpine1/Cav2/Cav1/Hipk2/Zyx/Strap/Sox5/Tgfb1/Ltbp4/Pdcd5/Furin/Lrrc32/Sox6/Tgfb1i1/Htra1/Col4a2/Adam9/Snx25/Smad1/Gipc1/Cdh5/Glg1/Pdgfd/Dnm2/Smad3/Snx1/Cd109/Tgfbr2/Ptprk/Fyn/Chst11/Appl2/Xbp1/Mapk7/Sox9/Adam17/Fut8/Zfp36l1/Dusp22/Smad5/Map3k1/Fermt2/Dab2/Ptk2/Acvrl1/Crkl/Cldn5/Nrros/…	75
GO:0071559	BP	GO:0071559	response to transforming growth factor beta	76/3832	208/23174	2.27307e-12	1.39703e-08	1.08459e-10	Cflar/Itga8/Adamtsl2/Eng/Hspa5/Fbn1/Dusp15/Src/Pmepa1/Skil/Smad9/Sdcbp/Cdkn2b/Nos3/Emilin1/Yes1/Htra3/Tgfbr3/Pxn/Serpine1/Cav2/Cav1/Hipk2/Zyx/Strap/Sox5/Tgfb1/Ltbp4/Pdcd5/Furin/Lrrc32/Sox6/Tgfb1i1/Htra1/Col4a2/Adam9/Snx25/Smad1/Gipc1/Cdh5/Glg1/Pdgfd/Dnm2/Smad3/Snx1/Cd109/Tgfbr2/Ptprk/Fyn/Chst11/Appl2/Xbp1/Mapk7/Sox9/Rock2/Adam17/Fut8/Zfp36l1/Dusp22/Smad5/Map3k1/Fermt2/Dab2/Ptk2/Acvrl1/Crkl/Cldn5/…	76
GO:0055074	BP	GO:0055074	calcium ion homeostasis	142/3832	490/23174	2.6416e-12	1.62353e-08	1.24339e-10	Ackr3/Bcl2/Atp2b4/Tmco1/Atp1a2/Slc30a1/Grin1/Itgav/Aplnr/Ryr3/Prnp/Plcb1/Slc24a3/Fkbp1a/Tgm2/Cd40/Vapb/Gnas/Edn3/Oprl1/Trpc3/Selenot/Rap1gds1/Lyn/Chd7/Asph/Selenon/Clstn1/Sri/Htt/Wfs1/Cd38/Stim2/Pdgfra/Kdr/Tmem165/Pkd2/Cmklr1/Trpv4/Atp2a2/P2rx7/Gtf2i/Fzd9/Tac1/Cav1/Trim24/Adcyap1r1/Snca/Immt/Gata2/Itpr1/Cd4/Kcna5/Itpr2/Slc8a2/Dmpk/Gpr4/Tgfb1/Trpm4/Hrc/Chrna7/P2ry2/Stim1/Ric3/Swap70/Adm/Prkcb/Atp7…	142
GO:0051963	BP	GO:0051963	regulation of synapse assembly	52/3832	119/23174	2.68884e-12	1.65256e-08	1.24875e-10	Adgrb3/Grin1/Nlgn1/Slitrk3/Lingo4/Pdlim5/Ptprd/Adgrb2/Clstn1/Agrn/Adgrl3/Cux2/Snca/Grid2/Lrrtm4/Lrrn1/Lrtm2/Clstn3/Lrrc4b/Ntrk3/Adgre5/Lrrtm3/Ntn1/Nlgn2/Asic2/Nptx1/Lrfn5/Mdga2/Arf6/Six4/Sema4d/Slitrk1/Slitrk6/Slitrk5/Ptk2/Adgrb1/Nptxr/Eif4g1/Ephb3/Il1rap/App/Nrxn1/Lrrtm2/Nrg2/Cbln2/Flrt1/Slitrk4/Slitrk2/Il1rapl1/Arhgef9/Nlgn3/Bhlhb9	52
GO:0051271	BP	GO:0051271	negative regulation of cellular component movement	102/3832	315/23174	2.75695e-12	1.69442e-08	1.26354e-10	Tmeff2/Bcl2/Adora1/Mia3/Gata3/Notch1/Egfl7/Eng/Ptprj/Spred1/Dll4/Sema6d/Plcb1/Ptprt/Rap2b/Sfrp2/Adam15/Cers2/Klf4/Tie1/Ptpru/Sema3d/Emilin1/Drd5/Limch1/Tgfbr3/Serpine1/Stard13/Ptn/Adamts9/Mitf/Cxcl12/Cd9/Strap/Tgfb1/Actn4/Rras/Nr2f2/Acan/Abhd2/Ccl25/Angpt2/Dlc1/Calr/Cx3cl1/Nrp1/Sept7/Robo4/Dnaja4/Map2k5/Tpm1/Dag1/Rhoa/Ptprk/Adarb1/Cnn2/Tbxa2r/Ptprr/Lrp1/Cd63/Igfbp3/Il4/Nf1/Mmp28/Nog/Stat3/Dusp3/S…	102
GO:0043112	BP	GO:0043112	receptor metabolic process	74/3832	201/23174	2.86881e-12	1.76317e-08	1.28248e-10	Lmbrd1/Ackr3/Ramp1/Rab29/Dnm3/Optn/Dnm1/Itgav/Calcrl/Gria2/Ankrd13c/Sdcbp/Eps15/Rspo1/Hdac1/Ldlrap1/Ece1/Vamp3/Agrn/Lrpap1/Ankrd13a/Ache/Lmtk2/Cav1/Snca/Iqsec1/Cd9/Rep15/Tgfb1/Sirt2/Ptpn5/Furin/Arap1/Adm/Cd81/Fnta/Snx25/Necab2/Itgb1/Dnm2/Snx1/Anxa2/Myo6/Syne1/Cnpy2/Cd63/Znrf3/Sec24a/Cltc/Rnf43/Hap1/Ramp2/Nsf/Cacng4/Hif1a/Fut8/Agtr1a/Edn1/Dab2/Arc/Tfrc/Dtx3l/Synj1/Vegfa/Tbc1d5/Rab5a/Rab31/Ehd3/Lrr…	74
GO:0030100	BP	GO:0030100	regulation of endocytosis	96/3832	290/23174	2.87192e-12	1.76508e-08	1.28248e-10	Smap1/Il15ra/Tor1a/Dnm1/Lrp2/Itgav/Ptprj/B2m/Src/Nlgn1/Syt11/Rap1a/Sdcbp/Ppt1/Rspo1/Fgr/Ldlrap1/Rap1gap/Lrpap1/Ankrd13a/Hip1r/Scarb1/Hip1/Serpine1/Cav1/Snca/Vamp8/Dysf/Aak1/Gata2/Iqsec1/Bicd1/Tgfb1/Sirt2/Actn4/Ptpn5/Sh3gl3/Tub/Cd151/Gas6/Calr/Cdh13/Necab2/Itgb1/Dnm2/Cbl/Scamp5/Anxa2/Snap91/Trf/Syne1/Snx3/Atg5/Cnn2/Abca7/Appl2/Lrp1/Cd63/Rufy1/Kif3a/Il4/Epn2/Vtn/Hap1/Rab5c/Nsf/Hfe/Lman2/Mctp1/F2rl1…	96
GO:0045860	BP	GO:0045860	positive regulation of protein kinase activity	130/3832	437/23174	3.00974e-12	1.84978e-08	1.32701e-10	Ccnyl1/Ralb/Atp2b4/Adora1/Inava/Stk39/Dusp19/Traf6/Rasgrp1/Prnp/Rassf2/Src/Cd40/Edn3/Tnik/Rapgef2/Efna1/Rap1a/Csf1/Ccn1/Dab1/Tal1/Agrn/Kit/Pkd2/Pxn/Taok3/P2rx7/Fzd10/Pdgfa/Mmd2/Flt1/Arhgef5/Snca/Gadd45a/Tgfa/Camk1/Ret/Cd4/Tgfb1/Pak4/Chrna7/Akap13/Ntrk3/Nox4/Grm5/Fzd4/Cd81/Ccnd1/Gas6/Adam9/Fgfr1/Acsl1/Gab1/Mlkl/Agt/Pdgfd/Tirap/Il18/Cspg4/Map2k5/Map2k1/Parp16/Trf/Dag1/Rhoa/Ltf/Tgfbr2/Higd1a/Sash1/M…	130
GO:0006644	BP	GO:0006644	phospholipid metabolic process	109/3832	346/23174	3.5237e-12	2.16566e-08	1.5342e-10	Inpp1/Pgap1/Acsl3/Pla2g4a/Pigc/Capn2/Bpnt1/Agpat2/Lpcat4/Gpcpd1/Plcb1/Abhd12/Src/Fitm2/Pigt/Pld1/Vav3/Plppr5/Pla2g12a/Sgms2/Lyn/Impad1/Plppr1/Tek/Inpp5b/Fabp3/Fgr/Cdc42/Fgfr3/Pdgfra/Mvk/Scarb1/Pdgfa/Rac1/Flt1/Pyurf/Snca/Hdhd5/Lpcat3/Etnk1/Mboat7/Tgfb1/Rab38/Inppl1/Smpd1/Far1/Pik3c2a/Gde1/Cdipt/Plpp4/Cd81/Pnpla6/Cln8/Inpp4b/Lpcat2/Mvd/Ldlr/Pigyl/Lipc/Plscr1/Pik3cb/Abhd5/Smpd2/Smpdl3a/Chpt1/Dgka/Pl…	109
GO:0001503	BP	GO:0001503	ossification	117/3832	381/23174	3.78924e-12	2.32887e-08	1.62945e-10	Fhl2/Nab1/Bcl2/Ptgs2/Dnm3os/Ifi204/Mia3/Notch1/Creb3l1/Ext2/Traf6/Rassf2/Id1/Mmp9/Cebpb/Bmp7/Gnas/Hey1/Fndc3b/Fat4/Wwtr1/Igsf10/Sfrp2/Lmna/Ecm1/Csf1/Lef1/Ccn1/Impad1/Mmp16/Glis1/Zmpste24/Matn1/Fgr/Id3/Hspg2/Alpl/Epha2/Fgfr3/Tapt1/Rest/Areg/Tgfbr3/Zfp932/P2rx7/Sbds/Fzd9/Tac1/Ptn/Eif2ak3/Mgp/Tgfb1/Trpm4/P2ry2/Inppl1/Xylt1/Igf2/Fgfr1/Csgalnact1/Smad1/Prkaca/Mmp2/Cbfb/Sik3/Cd276/Smad3/Rhoa/Pth1r/Ltf/…	117
GO:0030336	BP	GO:0030336	negative regulation of cell migration	90/3832	267/23174	4.4298e-12	2.72255e-08	1.88167e-10	Tmeff2/Bcl2/Adora1/Mia3/Notch1/Egfl7/Eng/Ptprj/Spred1/Dll4/Sema6d/Plcb1/Ptprt/Rap2b/Sfrp2/Adam15/Cers2/Klf4/Tie1/Ptpru/Emilin1/Drd5/Limch1/Tgfbr3/Serpine1/Stard13/Ptn/Adamts9/Mitf/Cxcl12/Strap/Tgfb1/Rras/Nr2f2/Acan/Abhd2/Ccl25/Angpt2/Dlc1/Calr/Cx3cl1/Sept7/Robo4/Dnaja4/Map2k5/Tpm1/Dag1/Rhoa/Ptprk/Adarb1/Cnn2/Tbxa2r/Ptprr/Lrp1/Cd63/Igfbp3/Il4/Nf1/Mmp28/Nog/Stat3/Dusp3/Slc9a3r1/Arhgdia/Meox2/Dusp22…	90
GO:0090407	BP	GO:0090407	organophosphate biosynthetic process	143/3832	498/23174	4.68517e-12	2.87951e-08	1.94329e-10	Pgap1/Acsl3/Pid1/Pfkfb2/Nmnat2/Pigc/Adcy10/Capn2/Agpat2/Mtch2/Lpcat4/Plcb1/Acss1/Fitm2/Pigt/Pld1/Npr1/Sgms2/Papss1/Ak5/Vcp/Ak4/Fabp3/Nmnat1/Nos3/Acacb/Mvk/P2rx7/Pdgfa/Foxk1/Impdh1/Bpgm/Adcyap1r1/Pyurf/Snca/Suclg1/Hdhd5/Lpcat3/Tpi1/Etnk1/Mboat7/Tgfb1/Gpi1/Aspdh/Rab38/Inppl1/Ampd3/Far1/Pik3c2a/Aldoa/Cdipt/Ido2/Acsl1/Dctd/Lpcat2/Mlycd/Mvd/Pigyl/Mpi/Adpgk/Pkm/Map2k1/Plscr1/Pik3cb/Pth1r/Plcd1/Abhd5/Pf…	143
GO:0072593	BP	GO:0072593	reactive oxygen species metabolic process	95/3832	288/23174	4.68645e-12	2.88029e-08	1.94329e-10	Cflar/Ndufs1/Pid1/Bcl2/Atp2b4/Inava/Ptgs2/Tlr5/Cd34/Grin1/Ndufs3/Cat/Prex1/Ptgis/Ccn1/Klf4/Prdx1/Sesn2/Nos3/Mpv17/Drd5/Sod3/Pkd2/Dynll1/P2rx7/Rac1/Cav1/Cycs/Snca/Gadd45a/Spr/Tafa4/Hrh1/Tgfb1/Sirt2/Selenos/Nox4/Prcp/Clcn3/Ndufa13/Klf2/Agt/Mmp8/Birc3/Icam1/Dnm2/Epor/Il18/Cryab/Smad3/Rora/Gnai2/Rhoa/Gpx1/Tgfbr2/Ccn2/Fyn/Atg5/Egfr/Il4/Gpx3/Eif5a/Nos2/Epx/Stat3/Rock2/Hif1a/Fbln5/Agtr1a/Nqo2/Ripk1/Edn1…	95
GO:0016311	BP	GO:0016311	dephosphorylation	112/3832	361/23174	5.30585e-12	3.26097e-08	2.17425e-10	Eya1/Slc39a10/Inpp1/Ptprn/Phlpp1/Bcl2/Ppp1r15b/Adora1/Dusp27/Dusp23/Gpatch2/Ptpn14/Ppp2r5a/Nsmf/Ppp1r26/Dusp19/Ptprj/Spred1/Dusp2/Ptpra/Fkbp1a/Dusp15/Ppp1r16b/Ptprt/Nceh1/Gba/Cdc14a/Plppr5/Plppr1/Fkbp15/Ptprd/Inpp5b/Ptp4a2/Ptpru/Alpl/Htt/Tmem132d/Rimbp2/Elfn1/Ptprz1/Thnsl2/Dusp11/Wnk1/Dusp16/Ptpro/Ppp6r1/Tgfb1/Hpn/Pnkp/Ptpn5/Mphosph10/Sytl2/Inppl1/Smpd1/Swap70/Chp2/Plpp4/Ptpre/Dusp26/Mfhas1/Dlc1/…	112
GO:0043534	BP	GO:0043534	blood vessel endothelial cell migration	50/3832	114/23174	5.93657e-12	3.64861e-08	2.40442e-10	Ptgs2/Mia3/Notch1/Spred1/Dll4/Cd40/Efna1/Klf4/Epha2/Nos3/Fgfbp1/Kdr/Scarb1/Stard13/Gata2/Prkd2/Tgfb1/Prcp/Pik3c2a/Igf2/Angpt2/Fgfr1/Hmox1/Nrp1/Itgb1/Ets1/Map2k5/Rhoa/Gpx1/Tbxa2r/Atp5b/Nf1/Adam17/Meox2/Clec14a/Hif1a/Rhoj/Mmrn2/Egr3/Rgcc/Myh9/Card10/Pdgfb/Acvrl1/Nr4a1/Csnk2b/Vegfa/Jcad/Atp5a1/Anxa1	50
GO:0006163	BP	GO:0006163	purine nucleotide metabolic process	130/3832	441/23174	6.07691e-12	3.73487e-08	2.43297e-10	Ndufs1/Pid1/Pfkfb2/Adcy10/Ndufs2/Atp1a2/Ndufa8/Mtch2/Acss1/Samhd1/Mfn1/Npr1/Papss1/Ak5/Vcp/Ak4/Hmgcl/Epha2/Nmnat1/Crot/Nos3/Nudt9/Iscu/Acacb/Mvk/P2rx7/Nipsnap2/Foxk1/Impdh1/Bpgm/Cycs/Snca/Suclg1/Suclg2/Tpi1/Far2/Tgfb1/Gpi1/Ldha/Dgat2/Ampd3/Far1/Aldoa/Acsl1/Coq9/Nudt7/Mlycd/Mvd/Sdhd/Mpi/Adpgk/Pkm/Map2k1/Clpx/Rora/Nt5e/Rhoa/Uqcrc1/Enpp1/Enpp3/Pfkl/Shmt2/Atp5b/Uqcr10/Ogdh/Pank3/Adora2b/Myh3/Nos2/Sta…	130
GO:0072659	BP	GO:0072659	protein localization to plasma membrane	92/3832	277/23174	6.58989e-12	4.05014e-08	2.60836e-10	Acsl3/Pid1/Ramp1/Dpp10/Nfasc/Blzf1/F11r/Ppp2r5a/Optn/Gpr158/Gorasp2/Kcnip3/Prnp/Kcnb1/Lama5/Tnik/Prkci/Rapgef2/Rap1a/Dennd4c/Tmem59/Ldlrap1/Epha2/Vamp3/Rer1/Dpp6/Prkg2/Rilpl1/Cnpy4/Rac1/Vamp5/Vamp8/Tnfrsf1a/Ehd2/Tgfb1/Plekhf1/Sytl2/Rhog/Stx4a/Cd81/Gas6/Ank1/Golga7/Itgb1/Rdx/Ptpn9/Rab11a/Anxa2/Myo5a/Epm2a/Map7/Gopc/Tspan15/Bsg/Lrp1/Egfr/Sptbn1/Arhgap44/Tmem88/Rab34/Cltc/Ramp2/Nsf/Slc9a3r1/Rab10/Ro…	92
GO:0006874	BP	GO:0006874	cellular calcium ion homeostasis	137/3832	474/23174	7.89254e-12	4.85076e-08	3.08887e-10	Ackr3/Bcl2/Atp2b4/Tmco1/Atp1a2/Slc30a1/Grin1/Itgav/Aplnr/Ryr3/Prnp/Plcb1/Slc24a3/Fkbp1a/Tgm2/Cd40/Vapb/Edn3/Oprl1/Trpc3/Selenot/Rap1gds1/Lyn/Chd7/Asph/Selenon/Clstn1/Sri/Htt/Wfs1/Cd38/Stim2/Pdgfra/Kdr/Tmem165/Pkd2/Cmklr1/Trpv4/Atp2a2/P2rx7/Gtf2i/Fzd9/Tac1/Cav1/Adcyap1r1/Snca/Immt/Gata2/Itpr1/Cd4/Kcna5/Itpr2/Slc8a2/Dmpk/Gpr4/Tgfb1/Trpm4/Hrc/Chrna7/P2ry2/Stim1/Ric3/Swap70/Adm/Prkcb/Atp7b/Jak3/Ednra…	137
GO:0072521	BP	GO:0072521	purine-containing compound metabolic process	139/3832	484/23174	9.21686e-12	5.66468e-08	3.56708e-10	Ndufs1/Pid1/Pfkfb2/Adcy10/Ndufs2/Atp1a2/Ndufa8/Mtch2/Acss1/Samhd1/Mfn1/Npr1/Dpyd/Papss1/Ak5/Vcp/Mtap/Ak4/Hmgcl/Epha2/Nmnat1/Crot/Nos3/Slc2a9/Nudt9/Iscu/Acacb/Mvk/P2rx7/Nipsnap2/Foxk1/Impdh1/Ahcyl2/Bpgm/Cycs/Abcg2/Snca/Suclg1/Suclg2/Tpi1/Far2/Tgfb1/Gpi1/Ldha/Dgat2/Ampd3/Far1/Aldoa/Acsl1/Coq9/Nudt7/Mlycd/Mvd/Sdhd/Mpi/Adpgk/Pkm/Map2k1/Clpx/Rora/Nt5e/Acpp/Rhoa/Uqcrc1/Mthfd1l/Enpp1/Enpp3/Slc16a9/Pfkl/…	139
GO:0009150	BP	GO:0009150	purine ribonucleotide metabolic process	124/3832	417/23174	9.8265e-12	6.03937e-08	3.76124e-10	Ndufs1/Pid1/Pfkfb2/Adcy10/Ndufs2/Atp1a2/Ndufa8/Mtch2/Acss1/Mfn1/Npr1/Papss1/Ak5/Vcp/Ak4/Hmgcl/Epha2/Nmnat1/Crot/Nudt9/Iscu/Acacb/Mvk/P2rx7/Nipsnap2/Foxk1/Impdh1/Bpgm/Cycs/Snca/Suclg1/Suclg2/Tpi1/Far2/Tgfb1/Gpi1/Ldha/Dgat2/Ampd3/Far1/Aldoa/Acsl1/Coq9/Nudt7/Mlycd/Mvd/Sdhd/Mpi/Adpgk/Pkm/Map2k1/Clpx/Rora/Nt5e/Rhoa/Uqcrc1/Enpp1/Enpp3/Pfkl/Shmt2/Atp5b/Uqcr10/Ogdh/Pank3/Myh3/Stat3/Atp5h/Fasn/Dld/Mbip/Hi…	124
GO:1901615	BP	GO:1901615	organic hydroxy compound metabolic process	136/3832	471/23174	1.01513e-11	6.23901e-08	3.80539e-10	Inpp1/Acadl/Pnkd/Cyp27a1/Per2/Hdlbp/Bcl2/Pfkfb2/Cyb5r1/Soat1/Itpkb/Ephx1/Lbr/Gata3/Abca2/Mtch2/Cat/Plcb1/Pltp/Slco4a1/Slc7a11/Rapgef2/Gba/Npr1/Nfkb1/Ttc39b/Lepr/Dhcr24/Inpp5b/Ldlrap1/Akr7a5/Cyp51/Insig1/Htt/Kit/Srd5a3/Rest/Mvk/Scarb1/Adcyap1r1/Snca/Dysf/Spr/Tpi1/Hpn/Ldha/Acer3/Dgat2/Mogat2/Inppl1/Smpd1/Cyb5r2/Gde1/Apobr/Dhcr7/Cln8/Fgfr1/Erlin2/Asah1/Msmo1/Inpp4b/Gipc1/Cdh3/Mvd/Ldlr/Aplp2/Slc37a4/…	136
GO:0051961	BP	GO:0051961	negative regulation of nervous system development	111/3832	360/23174	1.01604e-11	6.24455e-08	3.80539e-10	Itm2c/Rab29/Gpr37l1/Tnr/Dnm3/Il15ra/Vim/Notch1/Rtn4rl2/Eif2ak4/B2m/Sema6d/Nkx2-2/Id1/Bmp7/Hey1/Nlgn1/Rapgef2/Efna1/Cers2/Nbn/Brinp1/Cdkn2b/Dab1/Id3/Rap1gap/Hes5/Sema3d/Fgfr3/Cd38/Rest/Trpv4/Cav1/Ptprz1/Ptn/Eif2ak3/Cntn4/Tgfb1/Dll3/Sirt2/Mag/Ntrk3/Ctsc/Inppl1/Dennd5a/Xylt1/Hook3/Prkaca/Calr/Irx3/Nrp1/Itgb1/Fat3/Ldlr/Prkcsh/Lingo1/Cspg4/Ptpn9/Neo1/Prtg/Rhoa/Zfp365/Appl2/Rfx4/Hmga2/Lrp1/Kremen1/Efem…	111
GO:0071902	BP	GO:0071902	positive regulation of protein serine/threonine kinase activity	92/3832	279/23174	1.03562e-11	6.36492e-08	3.83748e-10	Ccnyl1/Ralb/Atp2b4/Adora1/Inava/Stk39/Dusp19/Traf6/Rasgrp1/Src/Cd40/Edn3/Tnik/Rapgef2/Kit/Pkd2/Pxn/Taok3/P2rx7/Fzd10/Pdgfa/Flt1/Arhgef5/Snca/Gadd45a/Tgfa/Camk1/Ret/Tgfb1/Chrna7/Akap13/Ntrk3/Nox4/Grm5/Fzd4/Cd81/Ccnd1/Adam9/Fgfr1/Acsl1/Gab1/Mlkl/Agt/Pdgfd/Tirap/Cspg4/Map2k5/Map2k1/Parp16/Trf/Rhoa/Ltf/Higd1a/Sash1/Map3k5/Tpd52l1/Shc2/Egfr/Irgm2/Pik3r6/Spag9/Adam17/Pik3cg/Mnat1/Ripk1/Edn1/Ror2/F2r/Ma…	92
GO:2000146	BP	GO:2000146	negative regulation of cell motility	92/3832	280/23174	1.29484e-11	7.9581e-08	4.7467e-10	Tmeff2/Bcl2/Adora1/Mia3/Gata3/Notch1/Egfl7/Eng/Ptprj/Spred1/Dll4/Sema6d/Plcb1/Ptprt/Rap2b/Sfrp2/Adam15/Cers2/Klf4/Tie1/Ptpru/Emilin1/Drd5/Limch1/Tgfbr3/Serpine1/Stard13/Ptn/Adamts9/Mitf/Cxcl12/Strap/Tgfb1/Rras/Nr2f2/Acan/Abhd2/Ccl25/Angpt2/Dlc1/Calr/Cx3cl1/Sept7/Robo4/Dnaja4/Map2k5/Tpm1/Dag1/Rhoa/Ptprk/Adarb1/Cnn2/Tbxa2r/Ptprr/Lrp1/Cd63/Igfbp3/Il4/Nf1/Mmp28/Nog/Stat3/Dusp3/Slc9a3r1/Arhgdia/Meox2/…	92
GO:0040013	BP	GO:0040013	negative regulation of locomotion	104/3832	331/23174	1.30825e-11	8.04049e-08	4.7467e-10	Tmeff2/Bcl2/Adora1/Mia3/Gata3/Notch1/Egfl7/Eng/Ptprj/Spred1/Dll4/Sema6d/Plcb1/Ptprt/Vapb/Rap2b/Sfrp2/Adam15/Cers2/Klf4/Tie1/Ptpru/Sema3d/Emilin1/Drd5/Limch1/Tgfbr3/Serpine1/Stard13/Ptn/Adamts9/Mitf/Cxcl12/Strap/Tgfb1/Rras/Nr2f2/Acan/Abhd2/Grm5/Ccl25/Angpt2/Dlc1/Calr/Cx3cl1/Nrp1/Sept7/Robo4/Dnaja4/Map2k5/Tpm1/Dag1/Rhoa/Ptprk/Adarb1/Cnn2/Tbxa2r/Ptprr/Lrp1/Cd63/Igfbp3/Il4/Nf1/Mmp28/Trim25/Nog/Stat3/…	104
GO:0001933	BP	GO:0001933	negative regulation of protein phosphorylation	121/3832	407/23174	1.77467e-11	1.09071e-07	6.37264e-10	Pid1/Phlpp1/Ppp1r15b/Fam129a/Eng/Stk39/Dnajc10/Dusp19/Ptprj/Prr5l/Hipk3/Spred1/Dusp2/Prnp/Rassf2/Fkbp1a/Ptprt/Dbndd2/Bmp7/Pmepa1/Mecom/Spry1/Wwtr1/E130311K13Rik/Sfrp2/Gba/Efna1/Cdc42se1/Lyn/Klf4/Cep85/Errfi1/Emilin1/Zfyve28/Drd5/Taok3/Sh2b3/P2rx7/Cav1/Snca/Gadd45a/Dusp16/Strap/Cadm4/Tgfb1/Sirt2/Spred3/Rasip1/Ptpn5/Chrna7/Lrrk1/Nr2f2/Ntrk3/Inppl1/Smpd1/Dusp26/Snx25/Cyld/Cbl/Il18/Cd109/Nck1/Dusp7/D…	121
GO:0022407	BP	GO:0022407	regulation of cell-cell adhesion	118/3832	394/23174	1.87413e-11	1.15184e-07	6.66112e-10	Igfbp2/Serpine2/Tnr/Itpkb/Mia3/Hlx/Gata3/Prkcq/Nrarp/Dpp4/Itga6/Itga4/Rag1/Traf6/Cd44/Rasgrp1/Prnp/Ccm2l/Src/Cebpb/Bmp7/Vcam1/Lef1/Bcl10/Lyn/Nr4a3/Klf4/Ptpru/Rap1gap/Trpv4/Sh2b3/Mad1l1/Cav1/Podxl/Ephb6/Gpnmb/Loxl3/Cxcl12/Wnk1/Cd4/Cd9/Tgfb1/Lrrc32/Swap70/Il4ra/Spn/Itgal/Igf2/Cd81/Ccl25/Jak3/Cyld/Cx3cl1/Cbfb/Nfat5/Piezo1/Icam1/Ets1/Il18/Rdx/Cd276/Map2k5/Map2k1/Il20rb/Nck1/Rhoa/Tgfbr2/Vsir/Xbp1/Peli…	118
GO:0035924	BP	GO:0035924	cellular response to vascular endothelial growth factor stimulus	30/3832	52/23174	1.96205e-11	1.20587e-07	6.90315e-10	Notch1/Dll4/Pdgfra/Kdr/Flt1/Prkd2/Cadm4/Adgra2/Gab1/Nrp1/Cd63/Xbp1/Flt4/Myo1c/Ramp2/Foxc1/Egr3/Spry2/Adamts12/Ptp4a3/Pdgfb/Nr4a1/Dll1/Vegfa/Xdh/Jcad/Sema6a/Ccbe1/Rela/Anxa1	30
GO:1901343	BP	GO:1901343	negative regulation of vasculature development	53/3832	128/23174	2.08566e-11	1.28185e-07	7.26469e-10	Adgrb3/Stat1/Col4a3/Notch1/Creb3l1/Cd59a/Spred1/Dll4/Ism1/Nfatc2/Bmp7/Klf4/Tek/Tie1/Adgrb2/Epha2/Emilin1/Gtf2i/Serpine1/Stard13/Ptn/Adamts9/Gpr4/Pde3b/Col4a2/Angpt2/Klf2/Hhip/Agt/Map2k5/Rhoa/Tbxa2r/Sparc/Epn2/Nf1/Rock2/Meox2/Foxc1/Stab1/Mmrn2/Bmp4/Rgcc/Spry2/Adgrb1/Card10/Pdgfb/Adamts1/Xdh/Ecscr/Sema6a/Nfatc1/Pdcd4/Pgk1	53
GO:0045216	BP	GO:0045216	cell-cell junction organization	57/3832	143/23174	2.32804e-11	1.43081e-07	7.98117e-10	Abi2/Cdh20/Nfasc/Pkp4/Cdh22/Prkci/Rhoc/Ugt8a/Epha2/Wdr1/Trpv4/Micall2/Rac1/Cav1/Cd9/Ptpro/Tgfb1/Actn4/Lsr/Prkaca/Kifc3/Cdh11/Cdh5/Cdh3/Cdh13/Agt/Itgb1/Smad3/Rhoa/Pdcd6ip/Gja1/Lims1/Pmp22/Myo1c/Cntnap1/Ramp2/Ace/Rock2/Grhl1/Prkch/Mpp5/F2rl1/F2r/Ocln/Marveld2/Vcl/Gjb2/Cdh6/Cdh10/Cdh18/Grhl2/Snai2/Arvcf/Cldn5/Dlg1/Lims2/Shroom2	57
GO:0042060	BP	GO:0042060	wound healing	110/3832	360/23174	2.33719e-11	1.43644e-07	7.98117e-10	Arfgef1/Dst/Tmeff2/Cflar/Fn1/Serpine2/F5/Mia3/Cd34/Prkcq/Col5a1/Tor1a/Eng/Tfpi/Ptprj/Cd44/Thbd/Ccm2l/Procr/Srsf6/Gnas/Slc7a11/Igsf10/Rap2b/Pear1/Syt11/S100a9/Stxbp3/F3/Ccn1/Lyn/Epb41l4b/Akirin1/Selenon/Drd5/Tec/Pdgfra/Arhgap24/Sh2b3/Fzd9/Serpine1/Pdgfa/Cav1/Ptn/Mmrn1/Dysf/Adipor2/Cd9/Vwf/Fgfr1op2/Arhgap35/Gpr4/Cadm4/Tgfb1/Prcp/Cd151/Cd81/F10/Gas6/Hmox1/Cx3cl1/Wfdc1/Pkm/Smad3/Tpm1/Anxa2/Cd109/Pik3…	110
GO:0043535	BP	GO:0043535	regulation of blood vessel endothelial cell migration	42/3832	90/23174	2.47821e-11	1.52311e-07	8.38057e-10	Ptgs2/Notch1/Spred1/Dll4/Cd40/Efna1/Klf4/Epha2/Nos3/Fgfbp1/Kdr/Stard13/Gata2/Prkd2/Tgfb1/Prcp/Pik3c2a/Igf2/Angpt2/Fgfr1/Hmox1/Nrp1/Ets1/Map2k5/Rhoa/Tbxa2r/Atp5b/Nf1/Adam17/Meox2/Hif1a/Rhoj/Mmrn2/Rgcc/Card10/Pdgfb/Acvrl1/Csnk2b/Vegfa/Jcad/Atp5a1/Anxa1	42
GO:1901652	BP	GO:1901652	response to peptide	115/3832	383/23174	2.82348e-11	1.73531e-07	9.45637e-10	Lmbrd1/Stat1/Pid1/Scly/Inhbb/Nucks1/Inava/Prkcq/Vim/Notch1/Grb14/Itga4/Gatm/Ptpra/Prnp/Plcb1/Src/Mmp9/Adrm1/Car2/Pld1/Prkci/Stxbp3/Vcam1/Nfkb1/Ggh/Nr4a3/Dennd4c/Leprot/Eif2b3/Sesn2/Slc9a1/Hadha/Eif2b4/Cpeb2/Tgfbr3/Trpv4/Pxn/Atp2a2/Vgf/Cav2/Cav1/Nod1/Chrna7/Cpeb1/Grm5/Inppl1/Pde3b/Prkcb/Ptpre/Igf2/Irs2/Eif4ebp1/Cacna1a/Mmp2/Agt/Sesn3/Icam1/Il18/Pkm/Myo5a/Nck1/Gnai2/Plcd1/Sgk1/Enpp1/Fyn/Egr2/Appl2/…	115
GO:0030099	BP	GO:0030099	myeloid cell differentiation	119/3832	401/23174	2.96066e-11	1.81962e-07	9.82138e-10	Smap1/Stat1/Casp8/Farp2/Rabgap1l/Itpkb/Lbr/Flvcr1/Gata3/Traf6/Lmo2/B2m/Fbn1/Rassf2/Plcb1/Src/Cebpb/Gnas/Car2/Gpr171/Tspan2/Csf1/Lef1/Lyn/Ptbp3/Tal1/Pabpc4/Wasf2/Epha2/Fgfr3/Wdr1/Kit/Tgfbr3/Sh2b3/Bpgm/Gata2/Mitf/Cd4/Ltbr/Clec2d/Relb/Tgfb1/Lrrk1/Sox6/Cd81/Cdkn1c/Ank1/Mfhas1/Jak3/Klf2/Inpp4b/Cbfb/Il34/Zfpm1/Fli1/Ets1/Tirap/Anxa2/Cd109/Plscr1/Trf/P4htm/Nbeal2/Tgfbr2/Ccr1/Ostm1/Il4/Nf1/Nfe2l1/Stat5b/S…	119
GO:0070371	BP	GO:0070371	ERK1 and ERK2 cascade	101/3832	323/23174	3.50713e-11	2.15548e-07	1.14646e-09	Cflar/Fn1/Ackr3/Phlpp1/Notch1/Itgav/Cd44/Spred1/Rasgrp1/Dusp15/Src/Spry1/E130311K13Rik/Rapgef2/Rap1a/Ccn1/Lyn/Klf4/Tek/Ece1/Epha2/Errfi1/Emilin1/Fgfr3/Pdgfra/Kit/Kdr/Trpv4/Pdgfa/Flt1/Cav1/Gpnmb/Nod1/Cd4/Prkd2/Tgfb1/Rras/Chrna7/Pde8a/Nox4/St5/Ccl25/Gas6/Dusp26/Mfhas1/Ednra/Cx3cl1/Necab2/Agt/Nrp1/Pdgfd/Icam1/Epor/Tirap/Map2k1/Ctsh/Trf/Gnai2/Ccr1/Akap12/Cnksr3/Ccn2/Abca7/Timp3/Dusp6/Ptprr/Lrp1/Xbp1/…	101
GO:0050768	BP	GO:0050768	negative regulation of neurogenesis	104/3832	336/23174	3.52185e-11	2.16453e-07	1.14646e-09	Itm2c/Rab29/Gpr37l1/Tnr/Dnm3/Il15ra/Vim/Notch1/Rtn4rl2/Eif2ak4/B2m/Sema6d/Nkx2-2/Id1/Bmp7/Hey1/Nlgn1/Rapgef2/Efna1/Cers2/Nbn/Brinp1/Cdkn2b/Dab1/Id3/Rap1gap/Hes5/Sema3d/Fgfr3/Cd38/Rest/Trpv4/Cav1/Ptprz1/Ptn/Cntn4/Tgfb1/Dll3/Sirt2/Mag/Ntrk3/Inppl1/Dennd5a/Xylt1/Hook3/Calr/Irx3/Nrp1/Itgb1/Fat3/Ldlr/Prkcsh/Lingo1/Cspg4/Ptpn9/Neo1/Prtg/Rhoa/Zfp365/Appl2/Hmga2/Lrp1/Kremen1/Efemp1/Pmp22/Ntn1/Nf1/Nog/Sta…	104
GO:0018212	BP	GO:0018212	peptidyl-tyrosine modification	100/3832	319/23174	3.73113e-11	2.29315e-07	1.20334e-09	Abi2/Adora1/Ptprj/Cd44/Prnp/Src/Cd40/Srms/Rap2b/Sfrp2/Efna1/Lyn/Tek/Tal1/Hdac1/Fgr/Errfi1/Hes5/Tnfrsf18/Agrn/Yes1/Fgfr3/Zfyve28/Txk/Tec/Pdgfra/Kit/Kdr/Areg/Tpst2/Pxn/Sh2b3/Tpst1/Pdgfa/Flt1/Cav2/Cav1/Ptprz1/Tgfa/Cd4/Tnfrsf1a/Cadm4/Tgfb1/Lrrk1/Nox4/Grm5/Igf2/Cd81/Gas6/Fgfr1/Jak3/Arl2bp/Agt/Nrp1/Itgb1/Pdgfd/Icam1/Aplp2/Cbl/Il18/Cspg4/Fyn/Erbb3/Egfr/Efemp1/Flt4/Il4/Irf1/Vtn/Ace/Pecam1/Chmp6/Aatk/Adam…	100
GO:0070972	BP	GO:0070972	protein localization to endoplasmic reticulum	32/3832	59/23174	3.96288e-11	2.43559e-07	1.26636e-09	Tram1/Tram2/Mia3/Rab3gap2/Sec61a2/Hspa5/Ddrgk1/Sec62/Ssr3/Tram1l1/Ankrd13c/Rer1/Insig1/Tapt1/Kdelr2/Sec61a1/Kdelr1/Spcs2/Spcs3/Srpr/Os9/Srp68/Rab10/Bcap29/Ryr2/Ubac2/Lrrk2/Vapa/Gbf1/Bcap31/Arxes2/Arxes1	32
GO:0048193	BP	GO:0048193	Golgi vesicle transport	86/3832	260/23174	4.03609e-11	2.48058e-07	1.27803e-09	Pgap1/Acsl3/Blzf1/Mia3/Optn/Rab14/Sec23b/Vapb/Prkci/Sec24d/Vcp/Stx17/Eps15/Vamp3/Rer1/Insig1/Preb/Nrbp1/Htt/Sec31a/Tmed5/Cux2/Tmed2/Snx8/Kdelr2/Bet1/Creb3l2/Vamp5/Tex261/Sec13/Kdelr1/Rab6a/Copb1/Lamp1/Ank1/Golga7/Trappc11/Cope/Dnm2/Tmed1/Hyou1/Arcn1/Snx1/Myo5a/Tmed3/Gopc/Arl1/Tmed4/Sptbn1/Sec24a/Sar1b/Trappc1/Kif1c/Sgsm2/Rab34/Gosr2/Nsf/Wipi1/Rab10/Nbas/Bcap29/Scfd1/Mia2/Tmed10/Kif13a/Lman2/Tmed9…	86
GO:0006486	BP	GO:0006486	protein glycosylation	70/3832	195/23174	4.21121e-11	2.58821e-07	1.30967e-09	Arfgef1/Uggt1/Mgat4a/B3gnt7/Ramp1/St8sia6/St6galnac4/Galnt13/Slc4a10/Galnt3/Slc35c1/Ext2/Rpn2/Serp1/Krtcap2/Extl2/Fut9/Vcp/Alg6/Tmem59/Pomgnt1/Ddost/Srd5a3/Tmem165/Lfng/C1galt1/St3gal5/Mogs/Gfpt1/Rpn1/Eogt/St8sia1/Fkrp/Dpy19l3/Fut10/Galnt7/B3gnt3/Dpy19l1/Stt3a/Mpi/Stt3b/Pofut2/Rxylt1/B3gnt2/Galnt10/Sdf2/Crppa/Mgat2/Fut8/Galnt16/Entpd5/Pomt2/Trip11/Fut11/Dad1/Extl3/Uggt2/Ext1/Mgat3/Alg1/Sdf2l1/Pog…	70
GO:0043413	BP	GO:0043413	macromolecule glycosylation	70/3832	195/23174	4.21121e-11	2.58821e-07	1.30967e-09	Arfgef1/Uggt1/Mgat4a/B3gnt7/Ramp1/St8sia6/St6galnac4/Galnt13/Slc4a10/Galnt3/Slc35c1/Ext2/Rpn2/Serp1/Krtcap2/Extl2/Fut9/Vcp/Alg6/Tmem59/Pomgnt1/Ddost/Srd5a3/Tmem165/Lfng/C1galt1/St3gal5/Mogs/Gfpt1/Rpn1/Eogt/St8sia1/Fkrp/Dpy19l3/Fut10/Galnt7/B3gnt3/Dpy19l1/Stt3a/Mpi/Stt3b/Pofut2/Rxylt1/B3gnt2/Galnt10/Sdf2/Crppa/Mgat2/Fut8/Galnt16/Entpd5/Pomt2/Trip11/Fut11/Dad1/Extl3/Uggt2/Ext1/Mgat3/Alg1/Sdf2l1/Pog…	70
GO:0007043	BP	GO:0007043	cell-cell junction assembly	46/3832	105/23174	4.31429e-11	2.65156e-07	1.32986e-09	Abi2/Cdh20/Nfasc/Pkp4/Cdh22/Rhoc/Ugt8a/Epha2/Wdr1/Trpv4/Micall2/Cav1/Cd9/Ptpro/Actn4/Lsr/Prkaca/Cdh11/Cdh5/Cdh3/Cdh13/Agt/Itgb1/Rhoa/Pdcd6ip/Gja1/Pmp22/Myo1c/Cntnap1/Ramp2/Ace/Rock2/Prkch/Mpp5/Ocln/Marveld2/Vcl/Gjb2/Cdh6/Cdh10/Cdh18/Grhl2/Snai2/Arvcf/Cldn5/Dlg1	46
GO:0060537	BP	GO:0060537	muscle tissue development	134/3832	471/23174	4.43252e-11	2.72422e-07	1.35431e-09	Sox17/Eya1/Col19a1/Fhl2/Cflar/Casp8/Dner/Bcl2/Tnnt2/Hlx/Itga8/Nebl/Notch1/Eng/Lrp2/Dll4/Cops2/Gpcpd1/Fkbp1a/Ccm2l/Bmp7/Hey1/Skil/Mbnl1/Tiparp/Lmna/Col11a1/Lef1/Pdlim5/Acadm/Chd7/Zmpste24/Heyl/Akirin1/Slc9a1/Selenon/Cdc42/Hspg2/Sgcb/Pdgfra/Tgfbr3/Tbx3/Eln/Cav2/Cav1/Vamp5/Dysf/Adamts9/Ybx3/Tgfb1/Sirt2/Nphs1/Tshz3/Myh14/Nr2f2/Akap13/Nox4/Sox6/Fgfr1/Sgcz/Slc25a4/Smad1/Zfpm1/Agt/Itgb1/Epor/AW551984/Us…	134
GO:0000041	BP	GO:0000041	transition metal ion transport	41/3832	88/23174	4.54741e-11	2.79484e-07	1.37733e-09	Slc40a1/Slc39a10/Steap3/Tmem163/Slc30a1/Slc39a12/Arhgap1/B2m/Slc30a4/Cp/Trpc3/Slc39a1/Slc30a7/Slc39a8/Slc31a2/Slc31a1/Steap4/Iscu/Lmtk2/Hrh1/Rep15/Pik3c2a/Atp7b/Dnm2/Trf/Snx3/Tcn2/Atox1/Cltc/Ryr2/Hfe/Sfxn1/Slc30a5/Slc25a37/Slc39a14/Tfrc/Slc39a7/Fth1/Mmgt1/Heph/Trpc5	41
GO:0032956	BP	GO:0032956	regulation of actin cytoskeleton organization	105/3832	342/23174	4.84191e-11	2.97584e-07	1.45389e-09	Arfgef1/Tmeff2/Abi2/Arpc2/F11r/Prkcq/Gsn/Nckap1/Id1/Prex1/Rhoc/Synpo2/Tmod1/Tek/Kank4/Fgr/Wasf2/Asap3/Cdc42/Arhgef10l/Wdr1/Limch1/Pxn/Arpc3/Hip1r/Fzd10/Eln/Rac1/Arpc1b/Tac1/Arhgef5/Eps8/Arhgap35/Vasp/Tgfb1/Nphs1/Akap13/Ntrk3/Arpin/Nox4/Fchsd2/Arap1/Rhog/Swap70/Arhgap17/Arhgef10/Dlc1/Bst2/Cx3cl1/Nrp1/Icam1/Jam3/Rdx/Smad3/Tpm1/Nck1/Rhoa/Ccn2/Arhgap18/Wasf1/Rhobtb1/Lrp1/Sptbn1/Arhgap44/Arhgef15/Pfn1…	105
GO:0007416	BP	GO:0007416	synapse assembly	66/3832	180/23174	5.19506e-11	3.19288e-07	1.54258e-09	Adgrb3/Rab29/Dnm3/Grin1/Nlgn1/Slitrk3/Lingo4/Pdlim5/Sdcbp/Ptprd/Adgrb2/Clstn1/Agrn/Adgrl3/Cux2/Ache/Sdk1/Lrrc4/Snca/Grid2/Lrrtm4/Lrrn1/Plxnd1/Lrtm2/Clstn3/Lrrc4b/Ntrk3/Gpm6a/Adgre5/Cacna1a/Myo6/Lrrtm3/Ntn1/Nlgn2/Asic2/Nptx1/Lrfn5/Mdga2/Arf6/Six4/Sema4d/Pcdh17/Slitrk1/Slitrk6/Slitrk5/Ptk2/Adgrb1/Nptxr/Pdgfb/Crkl/Eif4g1/Ephb3/Il1rap/App/Nrxn1/Lrrtm2/Nrg2/Cbln2/Nrxn2/Flrt1/Slitrk4/Slitrk2/Il1rapl1/A…	66
GO:0032963	BP	GO:0032963	collagen metabolic process	47/3832	109/23174	5.22586e-11	3.21181e-07	1.54258e-09	Tram2/Vim/Col5a1/Eng/Creb3l1/Id1/Mmp9/Adam15/Rap1a/Mmp16/Cyp2j6/Plod1/Errfi1/Emilin1/Fgfr3/Tgfbr3/P2rx7/Mmp17/Serpine1/P3h3/Tgfb1/Rcn3/Serpinh1/Mmp2/Mmp15/Itgb1/Mmp8/Il18/Plod2/Ccn2/Vsir/Adora2b/Mmp28/P3h4/Hif1a/F2r/Bmp4/Rgcc/Pdgfb/Rapgef3/Tns2/P3h2/Mmp25/Ppard/Ltbp1/Mkx/Prdx5	47
GO:0048754	BP	GO:0048754	branching morphogenesis of an epithelial tube	67/3832	184/23174	5.30696e-11	3.26166e-07	1.55336e-09	Eya1/Wnt6/Bcl2/Nrarp/Notch1/Eng/Cd44/Dll4/Src/Bmp7/Lama5/Spry1/Fat4/Sfrp2/Csf1/Lef1/Tek/Epha2/Pdgfra/Kdr/Areg/Pxn/Tbx3/Flt1/Plxnd1/Cxcl12/Mgp/Tgfb1/Rasip1/Col4a1/Ednra/Hhip/Foxf1/Agt/Nrp1/Pgr/Ctsh/Dag1/Tgfbr2/Hmga2/Mks1/Nog/Etv4/Sox9/Six4/Agtr1a/Edn1/Adamts16/Foxd1/Bmp4/Spry2/Sema5a/Myc/Tbx1/Etv5/Dlg1/Sox8/Notch4/Vegfa/Lama1/Greb1l/Slc12a2/Nfatc1/Lrp5/Ppp1ca/Gpc3/Maged1	67
GO:0009259	BP	GO:0009259	ribonucleotide metabolic process	124/3832	427/23174	5.50989e-11	3.38638e-07	1.58909e-09	Ndufs1/Pid1/Pfkfb2/Adcy10/Ndufs2/Atp1a2/Ndufa8/Mtch2/Acss1/Mfn1/Npr1/Papss1/Ak5/Vcp/Ak4/Hmgcl/Epha2/Nmnat1/Crot/Nudt9/Iscu/Acacb/Mvk/P2rx7/Nipsnap2/Foxk1/Impdh1/Bpgm/Cycs/Snca/Suclg1/Suclg2/Tpi1/Far2/Tgfb1/Gpi1/Ldha/Dgat2/Ampd3/Far1/Aldoa/Acsl1/Coq9/Nudt7/Mlycd/Mvd/Sdhd/Mpi/Adpgk/Pkm/Map2k1/Clpx/Rora/Nt5e/Rhoa/Uqcrc1/Enpp1/Enpp3/Pfkl/Shmt2/Atp5b/Uqcr10/Ogdh/Pank3/Myh3/Stat3/Atp5h/Fasn/Dld/Mbip/Hi…	124
GO:0003018	BP	GO:0003018	vascular process in circulatory system	71/3832	200/23174	5.52027e-11	3.39276e-07	1.58909e-09	Per2/Adora1/Ptgs2/Atp1a2/Ptprj/Edn3/Npr1/Rap1gds1/Ece1/Nos3/Drd5/Cd38/Kdr/Tgfbr3/Trpv4/Cav1/Mgll/Hrh1/Kcna5/Arhgap35/Tgfb1/Trpm4/P2ry2/Adm/Mrvi1/Adrb3/Ednra/Mmp2/Cx3cl1/Agt/Icam1/Il18/Map2k1/Manf/Rhoa/Gpx1/Akap12/Atg5/Gja1/Tbxa2r/Egfr/Adra1b/Adora2b/Asic2/Ramp2/Ace/Rock2/Dock4/Hif1a/Chga/Agtr1a/Foxc1/Edn1/F2rl1/F2r/Itga1/Gch1/Dock5/Htr2a/Ednrb/Ptk2/Ptp4a3/Pdgfb/Ppard/Vegfa/Nr3c1/Prkg1/Acta2/Add3/…	71
GO:2001236	BP	GO:2001236	regulation of extrinsic apoptotic signaling pathway	61/3832	161/23174	5.80098e-11	3.56528e-07	1.65621e-09	Sgk3/Eya1/Cflar/Casp8/Itm2c/Bcl2/Pea15a/G0s2/Itga6/Itgav/Pdia3/Mal/Src/Tnfsf10/Skil/Siah2/Sfrp2/Lmna/Bcl10/Htt/Serpine1/Cav1/Ret/Ltbr/Stx4a/Tnfrsf22/Fgfr1/Jak3/Hmox1/Cyld/Cx3cl1/Agt/Nrp1/Icam1/Ppp2r1b/Map2k5/Faim/Gpx1/Eya4/Fyn/Unc5b/Timp3/Agap2/Il4/Mapk7/Tnfsf12/Nf1/Rps6kb1/Tmc8/Inhba/Ripk1/Bmp4/Dab2/Trps1/Faim2/Snai2/Vegfa/Ppp1ca/Rela/Sgms1/Acsl5	61
GO:1903670	BP	GO:1903670	regulation of sprouting angiogenesis	35/3832	69/23174	5.97809e-11	3.67413e-07	1.68101e-09	Ptgs2/Notch1/Aplnr/Creb3l1/Spred1/Dll4/Ppp1r16b/S100a1/Klf4/Fgfbp1/Kdr/Stard13/Gata2/Adamts9/Pik3c2a/Klf2/Hmox1/Smad1/Nrp1/Pkm/Map2k5/Rhoa/Tbxa2r/Epn2/Meox2/Rhoj/Agtr1a/Mmrn2/Card10/Itga5/Dll1/Vegfa/Jcad/Sema6a/Anxa1	35
GO:0014015	BP	GO:0014015	positive regulation of gliogenesis	42/3832	92/23174	5.98438e-11	3.678e-07	1.68101e-09	Serpine2/Vim/Grin1/Notch1/Mir219a-2/Lrp2/Ptpra/Nkx2-2/Nkx2-2os/Prkci/Csf1/Lyn/Ufl1/Hdac1/Tnfrsf1b/Ptprz1/Ptn/Tgfb1/Mag/Il34/Trf/Dag1/Zfp365/Lrp1/Nog/Id2/Prkch/Il6st/Zfp488/Enpp2/Myc/Ptk2/Sox10/Crkl/Etv5/Hes1/App/Synj1/Olig2/Qk/Sox8/Rela	42
GO:0045446	BP	GO:0045446	endothelial cell differentiation	46/3832	106/23174	6.40574e-11	3.93697e-07	1.78498e-09	Sox17/F11r/Notch1/Eng/Id1/Ppp1r16b/Sox18/Hey1/Arhgef26/Rapgef2/Rap1a/Abcb1b/Kdr/Tnfrsf1a/Apold1/Tjp1/Nr2f2/Cdh5/Agt/S1pr2/Icam1/Rdx/Anxa2/Gpx1/Hey2/Col18a1/Vezf1/Tmem100/Pecam1/Fasn/Rock2/F2rl1/Marveld2/Bmp4/Wnt7b/Rapgef3/Acvrl1/Cldn5/Dll1/Notch4/Vegfa/Xdh/Zeb1/Tjp2/Dmd/Msn	46
GO:0015711	BP	GO:0015711	organic anion transport	120/3832	410/23174	6.50343e-11	3.99701e-07	1.79782e-09	Acsl3/Slc16a14/Per2/Sept2/Adora1/Pla2g4a/Kcnj10/Slc27a4/Slc4a10/Stk39/Lrp2/Slc43a1/Atp8b4/Slc23a2/Slc52a3/Pltp/Slco4a1/Slc7a11/Slc16a1/Slc16a4/Slc35a3/Abcd3/Pla2g12a/Slc6a9/Slc2a1/Mfsd2a/Fabp3/Abcb1a/Abcb4/Crot/Htt/Atp8a1/Slc4a4/P2rx7/Scarb1/Slc7a1/Repin1/Abcg2/Snca/Slc6a1/Slc25a18/Slc2a3/Slco1c1/Slco1a4/Slc7a10/Slco2b1/P2ry2/Arl6ip1/Irs2/Atp11a/Cln8/Slc25a15/Slc25a4/Acsl1/Gipc1/Cacna1a/Slc7a5/Ag…	120
GO:0034332	BP	GO:0034332	adherens junction organization	51/3832	124/23174	6.65286e-11	4.08885e-07	1.82464e-09	Abi2/Cdh20/Bcl2/Inava/Itgav/Ptprj/Src/Cdh22/Tek/Tesk2/Col16a1/Cdc42/Limch1/Kdr/Pxn/Rac1/Iqsec1/Rassf8/Dlc1/Kifc3/Cdh11/Cdh5/Cdh3/Cdh13/Nrp1/Rdx/Peak1/Smad3/Ptprk/Lims1/Lrp1/Ramp2/Dusp3/Arf6/Actn1/Dusp22/Vcl/Fermt2/Cdh6/Cdh10/Cdh18/Enpp2/Ptk2/Acvrl1/Ppm1f/Apod/Phldb2/Vegfa/Rhod/Slk/Arhgap6	51
GO:0110053	BP	GO:0110053	regulation of actin filament organization	84/3832	254/23174	6.84546e-11	4.20722e-07	1.8628e-09	Arfgef1/Tmeff2/Abi2/Arpc2/Prkcq/Gsn/Nckap1/Id1/Prex1/Rhoc/Synpo2/Tmod1/Kank4/Wasf2/Asap3/Arhgef10l/Wdr1/Limch1/Pxn/Arpc3/Hip1r/Eln/Rac1/Arpc1b/Tac1/Arhgef5/Eps8/Arhgap35/Vasp/Nphs1/Arpin/Nox4/Fchsd2/Arap1/Swap70/Arhgef10/Dlc1/Cx3cl1/Nrp1/Icam1/Rdx/Smad3/Tpm1/Nck1/Rhoa/Ccn2/Arhgap18/Wasf1/Rhobtb1/Sptbn1/Arhgef15/Pfn1/Myo1c/Pecam1/Baiap2/Rock2/Arf6/Jmy/F2rl1/Iqgap2/Pik3r1/Map3k1/Rhobtb2/Sorbs3/Rgcc…	84
GO:0051216	BP	GO:0051216	cartilage development	73/3832	209/23174	7.093e-11	4.35936e-07	1.9152e-09	Prrx1/Mia3/Frzb/Ddrgk1/Matn4/Sulf2/Bmp7/Gnas/Col20a1/Smad9/Sfrp2/Ecm1/Col11a1/Ccn1/Impad1/Zmpste24/Matn1/Hspg2/Hes5/Vwa1/Fgfr3/Tapt1/Trpv4/Creb3l2/Eif2ak3/Mgp/Sox5/Tgfb1/Acan/Serpinh1/Sox6/Fgfr1/Csgalnact1/Smad1/Glg1/Snx19/Barx2/Sik3/Smad3/Anxa2/Col12a1/Pth1r/Tgfbr2/Ccn2/Col6a2/Col6a1/Chst11/Efemp1/Anxa6/Rflnb/Nog/Axin2/Sox9/Hif1a/Trip11/Itgb8/Edn1/Ror2/Smad5/Bmp4/Bmp1/Adamts12/Trps1/Chadl/Wnt7b/…	73
GO:0043270	BP	GO:0043270	positive regulation of ion transport	99/3832	318/23174	7.21342e-11	4.43337e-07	1.93273e-09	Adora1/Rgs7/Grin1/Stk39/Aplnr/Lrrc55/Plcb1/Cebpb/Gnas/Edn3/Chrna4/Trpc3/S100a1/Asph/Fabp3/Slc9a1/Sri/Abcb1a/Abcb4/Dpp6/Nat8l/Htt/Wfs1/Stim2/Atp8a1/Pkd2/P2rx7/Orai1/Nipsnap2/Serpine1/Cav1/Adcyap1r1/Snca/Vamp8/Itpr1/Slc6a1/Cxcl12/Wnk1/Cd4/Kcna1/Cracr2a/P2ry2/Stim1/Arl6ip1/Kcnq1/Slc25a4/Jak3/Ednra/Cx3cl1/Agt/Dnm2/Anxa2/Slc38a3/Gpd1l/Ccr1/Cnksr3/Sgk1/Akap7/Abca7/Pirt/Atp1b2/Trpv3/Asic2/Hap1/Wnk4/Cacn…	99
GO:0001935	BP	GO:0001935	endothelial cell proliferation	56/3832	143/23174	7.87081e-11	4.8374e-07	2.09277e-09	Stat1/Cd34/Nrarp/Egfl7/Eng/Itga4/Aplnr/Dll4/Ppp1r16b/Ecm1/F3/Tek/Epha2/Fgfr3/Fgfbp1/Kdr/Scarb1/Flt1/Cav2/Cav1/Dysf/Gata2/Cxcl12/Prkd2/Emc10/Nr2f2/Igf2/Fgfr1/Hmox1/Cdh13/Pik3cb/Gja1/Xbp1/Flt4/Sparc/Adora2b/Nf1/Stat3/Adam17/Agtr1a/Bmp4/Egr3/Rgcc/Rictor/Sema5a/Pdgfb/Acvrl1/Nr4a1/Dlg1/Vegfa/Mydgf/Xdh/Jcad/Atp5a1/Apln/Plxnb3	56
GO:1902903	BP	GO:1902903	regulation of supramolecular fiber organization	105/3832	345/23174	8.54059e-11	5.24905e-07	2.25365e-09	Arfgef1/Tmeff2/Abi2/Arpc2/Camsap2/Prkcq/Slc39a12/Gsn/Nckap1/Map1a/Id1/Prex1/Rhoc/Synpo2/Tmod1/Kank4/Wasf2/Asap3/Arhgef10l/Emilin1/Wdr1/Limch1/Trpv4/Pxn/Arpc3/Hip1r/Eln/Rac1/Arpc1b/Tac1/Cav1/Arhgef5/Snca/Dysf/Eps8/Arhgap35/Vasp/Nphs1/Chrna7/Akap13/Arpin/Nox4/Fchsd2/Arap1/Swap70/Arhgef10/Dlc1/Colgalt1/Cx3cl1/Nrp1/Icam1/Ldlr/Cryab/Rdx/Smad3/Tpm1/Nck1/Rhoa/Sgk1/Ccn2/Arhgap18/Wasf1/Rhobtb1/Aebp1/Sptbn…	105
GO:0051668	BP	GO:0051668	localization within membrane	67/3832	186/23174	9.17177e-11	5.63697e-07	2.40201e-09	Dnm3/Mia3/Dnm1/Gsn/Itga4/Snap23/Sec23b/Nlgn1/Tnik/Slc7a11/Glrb/Rap1a/Sec24d/Eps15/Clstn1/Rer1/Agrn/Adam22/Insig1/Sec31a/Rilpl1/Fzd9/Rac1/Nptx2/Ptn/Lrrtm4/Iqsec1/Sec13/Shisa7/Tgfb1/Sirt2/Mesd/Itgal/Stx4a/Cd81/Cacna1a/Cdh13/Itgb1/Dnm2/Map2k1/Rab11a/Adam10/Myo6/Dag1/Zdhhc3/Syne1/Anks1b/Sec24a/Arhgap44/Shisa6/Hap1/Cacng4/Nptx1/Gphn/Gpc6/Arc/Nptxr/Grasp/Crkl/Etv5/Dlg1/Synj1/Nrxn1/Neto1/Nrxn2/Stx3/Arhg…	67
GO:0007178	BP	GO:0007178	transmembrane receptor protein serine/threonine kinase signaling pathway	107/3832	355/23174	1.06857e-10	6.56745e-07	2.77762e-09	Inhbb/Itga8/Vim/Notch1/Adamtsl2/Eng/Hspa5/Lrp2/Fbn1/Fkbp1a/Id1/Dusp15/Src/Bmp7/Pmepa1/Nceh1/Skil/Smad9/Wwtr1/Ppm1l/Sfrp2/Lef1/Ccn1/Sdcbp/Cdkn2b/Hes5/Emilin1/Htra3/Kdr/Tgfbr3/Pxn/Cav2/Cav1/Kcp/Hipk2/Zyx/Strap/Tgfb1/Ltbp4/Furin/Lrrc32/Tgfb1i1/Htra1/Adam9/Rbpms/Snx25/Smad1/Gipc1/Zfp423/Cdh5/Glg1/Dnm2/Neo1/Hexa/Smad3/Snx1/Cd109/Trf/Tgfbr2/Akap7/Ptprk/Vsir/Chst11/Appl2/Btbd11/Xbp1/Vwc2/Sptbn1/Jade2/Lg…	107
GO:0018108	BP	GO:0018108	peptidyl-tyrosine phosphorylation	98/3832	316/23174	1.13973e-10	7.00476e-07	2.94063e-09	Abi2/Adora1/Ptprj/Cd44/Prnp/Src/Cd40/Srms/Rap2b/Sfrp2/Efna1/Lyn/Tek/Tal1/Hdac1/Fgr/Errfi1/Hes5/Tnfrsf18/Agrn/Yes1/Fgfr3/Zfyve28/Txk/Tec/Pdgfra/Kit/Kdr/Areg/Pxn/Sh2b3/Pdgfa/Flt1/Cav2/Cav1/Ptprz1/Tgfa/Cd4/Tnfrsf1a/Cadm4/Tgfb1/Lrrk1/Nox4/Grm5/Igf2/Cd81/Gas6/Fgfr1/Jak3/Arl2bp/Agt/Nrp1/Itgb1/Pdgfd/Icam1/Aplp2/Cbl/Il18/Cspg4/Fyn/Erbb3/Egfr/Efemp1/Flt4/Il4/Irf1/Vtn/Ace/Pecam1/Chmp6/Aatk/Adam17/Agtr1a/Du…	98
GO:0051965	BP	GO:0051965	positive regulation of synapse assembly	37/3832	77/23174	1.30071e-10	7.99417e-07	3.33131e-09	Adgrb3/Nlgn1/Slitrk3/Lingo4/Ptprd/Adgrb2/Clstn1/Agrn/Adgrl3/Cux2/Grid2/Lrrtm4/Lrrn1/Lrtm2/Clstn3/Lrrc4b/Ntrk3/Adgre5/Lrrtm3/Nlgn2/Asic2/Sema4d/Slitrk1/Slitrk6/Slitrk5/Adgrb1/Ephb3/Il1rap/Nrxn1/Lrrtm2/Cbln2/Flrt1/Slitrk4/Slitrk2/Il1rapl1/Nlgn3/Bhlhb9	37
GO:0048017	BP	GO:0048017	inositol lipid-mediated signaling	60/3832	160/23174	1.35098e-10	8.30314e-07	3.43481e-09	Serpine2/Gata3/Gsn/Prr5l/Cat/Rasgrp1/Plcb1/Ppp1r16b/Pld1/Pear1/Car8/Klf4/Tek/Fgr/Pdgfra/Kdr/Pdgfa/Flt1/Sirt2/Ntrk3/Pik3c2a/Agt/Pdgfd/Cbl/Il18/Pik3cb/Fyn/Unc5b/Agap2/Erbb3/Xbp1/Egfr/Flt4/Pirt/Pik3r6/C1qbp/Nf1/Sox9/Slc9a3r1/Pik3cg/Zfp36l1/Entpd5/Edn1/Sema4d/F2rl1/F2r/Pik3r1/Htr2a/Npr3/Ptk2/Pdgfb/Prr5/Nlrc3/Synj1/Slc9a3r2/Ppard/Mydgf/Plcb3/Jak2/Plce1	60
GO:0022898	BP	GO:0022898	regulation of transmembrane transporter activity	83/3832	253/23174	1.39454e-10	8.57087e-07	3.51987e-09	Hecw2/Bcl2/Atp1a2/Stom/Stk39/Lrrc55/Prnp/Plcb1/Fkbp1a/Mmp9/Chrna4/Oprl1/Nlgn1/S100a1/Asph/Pde4b/Slc9a1/Selenon/Agrn/Sri/Abcb1a/Htt/Stim2/Anxa3/Pkd2/Nipsnap2/Cav1/Tcaf2/Snca/Dysf/Wnk1/Kcna1/Cracr2a/Shisa7/Fxyd5/Grm5/Stim1/Kcnq1/Slc25a4/Cacna1a/Jph3/Dnm2/Myo5a/Gnb5/Rasgrf1/Gpd1l/Cnksr3/Akap7/Gopc/Gja1/Shisa6/Pirt/Atp1b2/Nlgn2/Asic2/Hap1/Wnk4/Cacng4/Rgs9/Slc9a3r1/Ryr2/Ripk1/Glrx/Homer1/Pde4d/Slmap/C…	83
GO:0006790	BP	GO:0006790	sulfur compound metabolic process	87/3832	270/23174	1.43984e-10	8.84927e-07	3.60806e-09	Chpf/Ptges/Chst1/Chst14/Sqor/Acss1/Ggt7/Sulf2/Slc7a11/Gstm5/Gstm2/Papss1/Impad1/Mtap/Hmgcl/Ugdh/Tpst2/Iscu/Acacb/Mvk/Tpst1/Ahcyl2/Gstk1/Snca/Eif2ak3/Suclg1/Pcyox1/Nfu1/Suclg2/Far2/Nox4/Dgat2/Far1/Xylt1/Glrx3/Gsr/Acsl1/Spock3/Csgalnact1/Cacna1a/Chst5/Nudt7/Mlycd/Mvd/Glce/Ciao2a/Chst2/Acpp/Gpx1/Enpp1/Dse/Mical1/Spock2/Chst3/Chst11/Ogdh/Gpx3/Xylt2/Nfe2l1/Stat5b/Fasn/Dld/Mthfd1/Acot2/Acot1/Acot4/Acot…	87
GO:1903522	BP	GO:1903522	regulation of blood circulation	79/3832	237/23174	1.62648e-10	9.99636e-07	4.04664e-09	Per2/Atp2b4/Adora1/Tnnt2/Ptgs2/Atp1a2/Edn3/S100a1/Atp1a1/Kcnd3/Pde4b/Zmpste24/Slc9a1/Agrn/Sri/Nos3/Cd38/Atp2a2/Tac1/Cav1/Hrh1/Kcna5/Dmpk/Trpm4/Hrc/Chrna7/Adm/Glrx3/Kcnq1/Mmp2/Cx3cl1/Agt/Icam1/Map2k1/Tpm1/Cacna2d2/Rhoa/Gpd1l/Ccn2/Hey2/Gja1/Ctnna3/Tbxa2r/Smtn/Egfr/Adra1b/Asic2/Kcnj2/Gaa/Dock4/Hif1a/Chga/Ryr2/Agtr1a/Edn1/F2rl1/F2r/Pik3r1/Pde4d/Cacna1d/Ptger2/Gch1/Myh6/Dock5/Htr2a/Pdgfb/Dlg1/Atp5j/Eh…	79
GO:1904062	BP	GO:1904062	regulation of cation transmembrane transport	103/3832	340/23174	1.72563e-10	1.06057e-06	4.23641e-09	Hecw2/Dpp10/Atp2b4/Atp1a2/Rgs7/Slc30a1/Stom/Stk39/Aplnr/Lrrc55/Kcnip3/Prnp/Plcb1/Fkbp1a/Mmp9/Edn3/Chrna4/Oprl1/Nlgn1/S100a1/Lyn/Chd7/Asph/Slc31a2/Pde4b/Slc9a1/Selenon/Agrn/Sri/Dpp6/Htt/Stim2/Anxa3/Pkd2/Iscu/Nipsnap2/Cav1/Snca/Dysf/Wnk1/Kcna1/Cracr2a/Shisa7/Tgfb1/Fxyd5/Stim1/Pik3c2a/Kcnq1/Slc25a4/Ednra/Cacna1a/Cx3cl1/Jph3/Agt/Dnm2/Myo5a/Gnb5/Rasgrf1/Gpd1l/Cnksr3/Akap7/Fyn/Atg5/Cd63/Il4/Shisa6/Pirt…	103
GO:0097191	BP	GO:0097191	extrinsic apoptotic signaling pathway	77/3832	229/23174	1.73502e-10	1.06635e-06	4.23641e-09	Sgk3/Eya1/Cflar/Casp8/Itm2c/Bcl2/Pea15a/G0s2/Itga6/Itgav/Pdia3/Mal/Src/Tnfsf10/Skil/Siah2/Sfrp2/Lmna/Bcl10/Tnfrsf1b/Fgfr3/Htt/P2rx7/Serpine1/Cav1/Ret/Ltbr/Tgfb1/Stx4a/Tnfrsf22/Fgfr1/Ndufa13/Jak3/Hmox1/Cyld/Cx3cl1/Agt/Nrp1/Icam1/Il18/Ppp2r1b/Map2k5/Smad3/Bcl2a1a/Faim/Gpx1/Eya4/Fyn/Unc5b/Timp3/Agap2/Erbb3/Il4/Mapk7/Tnfsf12/Nf1/Rps6kb1/Tmc8/Rock2/Sgpp1/Inhba/Ripk1/Pik3r1/Bmp4/Itm2b/Dab2/Trps1/Faim2/…	77
GO:0048015	BP	GO:0048015	phosphatidylinositol-mediated signaling	59/3832	157/23174	1.73924e-10	1.06894e-06	4.23641e-09	Serpine2/Gata3/Gsn/Prr5l/Cat/Rasgrp1/Plcb1/Ppp1r16b/Pear1/Car8/Klf4/Tek/Fgr/Pdgfra/Kdr/Pdgfa/Flt1/Sirt2/Ntrk3/Pik3c2a/Agt/Pdgfd/Cbl/Il18/Pik3cb/Fyn/Unc5b/Agap2/Erbb3/Xbp1/Egfr/Flt4/Pirt/Pik3r6/C1qbp/Nf1/Sox9/Slc9a3r1/Pik3cg/Zfp36l1/Entpd5/Edn1/Sema4d/F2rl1/F2r/Pik3r1/Htr2a/Npr3/Ptk2/Pdgfb/Prr5/Nlrc3/Synj1/Slc9a3r2/Ppard/Mydgf/Plcb3/Jak2/Plce1	59
GO:0061138	BP	GO:0061138	morphogenesis of a branching epithelium	75/3832	221/23174	1.83362e-10	1.12694e-06	4.43526e-09	Eya1/Wnt6/Bcl2/Nrarp/Notch1/Eng/Cd44/Dll4/Src/Tgm2/Bmp7/Lama5/Spry1/Fat4/Sfrp2/Csf1/Lef1/Tek/Epha2/Pdgfra/Kdr/Areg/Pxn/Tbx3/Pdgfa/Flt1/Plxnd1/Cxcl12/Mgp/Tgfb1/Rasip1/Adm/Col4a1/Fgfr1/Ednra/Hhip/Foxf1/Agt/Nrp1/Pgr/Ctsh/Dag1/Tgfbr2/Hmga2/Mks1/Nog/Etv4/Sox9/Six4/Agtr1a/Edn1/Adamts16/Foxd1/Bmp4/Spry2/Sema5a/Grhl2/Myc/Sox10/Pdgfb/Snai2/Tbx1/Etv5/Dlg1/Sox8/Notch4/Vegfa/Lama1/Greb1l/Slc12a2/Nfatc1/Lrp5/…	75
GO:0070085	BP	GO:0070085	glycosylation	72/3832	209/23174	1.95324e-10	1.20046e-06	4.68219e-09	Arfgef1/Uggt1/Mgat4a/B3gnt7/Ramp1/St8sia6/St6galnac4/Galnt13/Slc4a10/Galnt3/Slc35c1/Ext2/Rpn2/Serp1/Gba/Krtcap2/Extl2/Fut9/Vcp/Alg6/Tmem59/Pomgnt1/Ddost/Srd5a3/Tmem165/Lfng/C1galt1/St3gal5/Mogs/Gfpt1/Rpn1/Eogt/St8sia1/Fkrp/Dpy19l3/Fut10/Galnt7/B3gnt3/Dpy19l1/Stt3a/Mpi/Stt3b/Pofut2/Rxylt1/B3gnt2/Galnt10/Sdf2/Crppa/Mgat2/Fut8/Galnt16/Entpd5/Pomt2/Trip11/Fut11/Dad1/Extl3/Cln5/Uggt2/Ext1/Mgat3/Alg1/S…	72
GO:0031644	BP	GO:0031644	regulation of neurological system process	63/3832	173/23174	1.96258e-10	1.2062e-06	4.68219e-09	Adora1/Tnr/Fcgr4/Kcnj10/Grin1/Src/Chrna4/Oprl1/Nlgn1/Gba/Kcnc4/Slc9a1/Tnfrsf1b/Grm3/Nos3/Cux2/Nptx2/Wasf3/Eif2ak3/Mgll/Tafa4/Shisa7/Dmpk/Mag/Chrna7/Ctsc/Fgfr1/Agt/S1pr2/Igsf9b/Trf/Acpp/Dag1/Syne1/S100b/Shisa6/Nlgn2/Tmem100/Cacng4/Nptx1/Baiap2/Rock2/Edn1/Homer1/F2r/Zfp488/Ednrb/Sox10/Nptxr/Lrrk2/Grin2a/Shisa9/Fgf12/App/Prkn/Tnfrsf21/Sh3gl1/Nrxn1/Neto1/Myrf/2700046G09Rik/Fmr1/Nlgn3	63
GO:0048732	BP	GO:0048732	gland development	131/3832	467/23174	2.03424e-10	1.25024e-06	4.82012e-09	Cflar/Serpine2/Bcl2/Hlx/Gata3/Notch1/Frzb/Rag1/Cd44/Src/Tgm2/Sulf2/Cebpb/Bmp7/Adrm1/Lama5/Csf1/Lef1/Acadm/Zdhhc21/Zmpste24/Rps6ka1/Rap1gap/Epha2/Pdgfra/Areg/Pkd2/Tgfbr3/Tbx3/Orai1/Aacs/Pdgfa/Mad1l1/Gsx1/Cav1/Ptn/Eif2ak3/Tgfa/Gata2/Itpr1/Plxnd1/Vwf/Arhgap35/Plaur/Tgfb1/Lsr/Hpn/Igf2/Cdkn1c/Ccnd1/Irs2/Atp7b/Fgfr1/Hmox1/Mmp2/Fa2h/Foxf1/Nrp1/Pgr/Prkcsh/Stra6/Pkm/Smad3/Map2k1/Foxb1/Nphp3/Dag1/Gpx1/Tgfb…	131
GO:0007044	BP	GO:0007044	cell-substrate junction assembly	39/3832	85/23174	2.37874e-10	1.46197e-06	5.59832e-09	Dst/Fn1/Tns1/Bcl2/Lamc1/Itgav/Ptprj/Src/Tln1/Tek/Tesk2/Col16a1/Limch1/Kdr/Pxn/Rac1/Dlc1/Nrp1/Peak1/Smad3/Ptprk/Lims1/Lrp1/Dusp3/Actn1/Dusp22/Fermt2/Enpp2/Ptk2/Plec/Acvrl1/Itga5/Ppm1f/Apod/Phldb2/Vegfa/Rhod/Slk/Arhgap6	39
GO:0006979	BP	GO:0006979	response to oxidative stress	116/3832	401/23174	2.95739e-10	1.81761e-06	6.91346e-09	Cflar/Ptprn/Scly/Bcl2/Ppp1r15b/Gpr37l1/Ptgs2/Ndufs2/Tor1a/Itgav/Prr5l/Cat/Atrn/Prnp/Srxn1/Ggt7/Src/Mmp9/Chrna4/Slc7a11/Etfdh/Casp6/Nfkb1/Sigmar1/Nr4a3/Txn1/Gpx7/Prdx1/Plk3/Hdac1/Sesn2/Selenon/Nos3/Mpv17/Cpeb2/Cd38/Sod3/Pdgfra/Rest/Atp2a2/Stx2/Snca/Mill2/Sirt2/Pnkp/Selenos/Pde8a/Ucp2/Stx4a/Cln8/Adam9/Gsr/Rbpms/Hmox1/Gab1/Mmp2/Sesn3/Epor/Cryab/Uaca/Map2k1/Gpx1/Map3k5/Ptprk/Fyn/Msrb3/Stat6/Xbp1/Egfr…	116
GO:0050679	BP	GO:0050679	positive regulation of epithelial cell proliferation	69/3832	199/23174	3.35506e-10	2.06202e-06	7.7908e-09	Eya1/Cflar/Ptprn/Nrarp/Notch1/Egfl7/Itga4/Aplnr/Id1/Ppp1r16b/Srsf6/Ecm1/F3/Nr4a3/Cdc42/Fgfr3/Fgfbp1/Kdr/Cav2/Cav1/Ptn/Dysf/Tgfa/Gata2/Itpr1/Cxcl12/Prkd2/Tgfb1/Hpn/Emc10/Htra1/Igf2/Ccnd1/Fgfr1/Hmox1/Cdh3/Cdh13/Map2k5/Hmga2/Agap2/Xbp1/Egfr/Flt4/Kif3a/Adora2b/Nf1/Nog/Stxbp4/Stat3/Sox9/Adam17/Agtr1a/Rreb1/Bmp4/Egr3/Rictor/Sema5a/Has2/Myc/Pdgfb/Acvrl1/Nr4a1/Tbx1/Vegfa/Mydgf/Jcad/Tcf7l2/Apln/Plxnb3	69
GO:0007266	BP	GO:0007266	Rho protein signal transduction	68/3832	195/23174	3.3932e-10	2.08546e-06	7.82718e-09	Arhgef4/Farp2/Prex1/Cdc42se1/Rhoc/Vav3/Ctnnal1/Cdc42/Arhgef10l/Plekhg5/Gna12/Rac1/Arhgef5/Rtkn/Fgd5/Eps8/Arhgap35/Gpr4/Rasip1/Akap13/Rhog/Arhgef10/Dlc1/Ednra/Ripor1/Cdh13/Nrp1/Itgb1/Hacd3/Rasgrf1/Rhoa/Rhobtb1/Adra1b/Ntn1/Arhgef15/Tnfaip1/Rnd2/Pecam1/Baiap2/Arhgdia/Itsn2/Rock2/Sos2/Rhoj/Plekhg3/Net1/Agtr1a/F2rl1/F2r/F2rl2/Arhgef28/Ccdc125/Arhgef3/Arhgef40/Spata13/Rhobtb2/Trio/Cdc42ep1/Bcl6/Rhoq/Gp…	68
GO:0034446	BP	GO:0034446	substrate adhesion-dependent cell spreading	43/3832	100/23174	3.79178e-10	2.33043e-06	8.68905e-09	Fn1/Arpc2/Lamc1/Itga8/Itga4/Itgav/Src/Prex1/Lama5/Fndc3b/Efna1/Tek/Hspg2/Vamp3/Pxn/Micall2/Rac1/Antxr1/Actn4/Fzd4/Dock1/Calr/Nrp1/Dnm2/Peak1/Lims1/C1qbp/Lamb1/Net1/Rreb1/Fermt2/Dock5/Dab2/Egflam/Enpp2/Has2/Ptk2/Parvb/Crkl/Ephb3/Fer/Lims2/Kank1	43
GO:0016050	BP	GO:0016050	vesicle organization	83/3832	258/23174	4.12873e-10	2.53752e-06	9.39935e-09	Ptprn/Serpine2/Agfg1/Bcl2/Pla2g4a/Dnm3/Mia3/Cd34/Dnm1/Rab14/Snap23/Usp8/Sec23b/Vapb/Prkci/Vav3/Mfsd14a/Sec24d/Sdcbp/Stx17/Vamp3/Insig1/Preb/Sec31a/Tmem175/P2rx7/Stx2/Samd9l/Bet1/Cav2/Snca/Vamp8/Dysf/Rab7/Tmf1/Sec13/Nectin2/Plekhf1/Rab38/Stx4a/Hook3/Clcn3/Dnm2/Snx19/Rab11a/Anxa2/Unc13c/Snap91/Nbeal2/Als2cl/Pdcd6ip/Snx3/Srgn/Washc4/Pmel/Pla2g3/Sec24a/Sar1b/Sept8/Rab34/Rab5c/Gosr2/Trim9/Tmed10/Kif13…	83
GO:0001505	BP	GO:0001505	regulation of neurotransmitter levels	109/3832	372/23174	4.4926e-10	2.76115e-06	1.01613e-08	Pnkd/Per2/Sept2/Atp2b4/Ptgs2/Atp1a2/Kcnj10/Tlr5/Slc30a1/Cd34/Hnmt/Tor1a/Snap23/Rims4/Ptgis/Edn3/Chrna4/Nlgn1/Slc7a11/Bche/Syt11/Rap1a/Kcnc4/Grin3a/Klf4/Slc6a9/Ppt1/Nos3/Nat8l/Pkd2/Git2/Dynll1/Rph3a/Atp2a2/P2rx7/Stx2/Ache/Rac1/Ica1/Cav1/Snca/Spr/Slc6a11/Slc6a1/Hrh1/Syn2/Kcnc3/Chrna7/Selenos/P2ry2/Arl6ip1/Prkcb/Stx4a/Cln8/Enpp6/Klf2/Nr3c2/Gipc1/Cacna1a/Agt/Mmp8/Naalad2/Icam1/Dnm2/Epor/Smad3/Rora/Un…	109
GO:0007159	BP	GO:0007159	leukocyte cell-cell adhesion	97/3832	319/23174	4.65413e-10	2.86043e-06	1.04588e-08	Igfbp2/Itpkb/Mia3/Hlx/Gata3/Prkcq/Nrarp/Dpp4/Itga4/Rag1/Traf6/Cd44/Rasgrp1/Prnp/Cebpb/Bmp7/S100a8/S100a9/Vcam1/Bcl10/Nr4a3/Klf4/Mad1l1/Cav1/Ephb6/Gpnmb/Loxl3/Cxcl12/Wnk1/Cd4/Tgfb1/Lrrc32/Il4ra/Spn/Itgal/Igf2/Cd81/Ccl25/Jak3/Cyld/Cbfb/Nfat5/Itgb1/Icam1/Ets1/Il18/Cd276/Nt5e/Il20rb/Nck1/Rhoa/Tgfbr2/Vsir/Madcam1/Xbp1/Peli1/Stk10/Il4/Irf1/Tnip1/Pik3r6/Lgals9/Stat5b/Dusp3/Pecam1/Zbtb1/Lgals8/Hfe/Dusp22…	97
GO:0032409	BP	GO:0032409	regulation of transporter activity	84/3832	263/23174	4.83721e-10	2.97295e-06	1.08005e-08	Hecw2/Bcl2/Atp1a2/Stom/Stk39/Lrrc55/Prnp/Plcb1/Fkbp1a/Mmp9/Chrna4/Oprl1/Nlgn1/S100a1/Asph/Pde4b/Slc9a1/Selenon/Agrn/Sri/Abcb1a/Htt/Stim2/Anxa3/Pkd2/Nipsnap2/Cav1/Tcaf2/Snca/Dysf/Wnk1/Kcna1/Cracr2a/Shisa7/Fxyd5/Grm5/Stim1/Kcnq1/Slc25a4/Cacna1a/Jph3/Dnm2/Myo5a/Gnb5/Rasgrf1/Gpd1l/Cnksr3/Akap7/Gopc/Gja1/Shisa6/Pirt/Atp1b2/Nlgn2/Asic2/Hap1/Wnk4/Cacng4/Rgs9/Slc9a3r1/Ryr2/Ripk1/Glrx/Homer1/Pde4d/Slmap/C…	84
GO:0060485	BP	GO:0060485	mesenchyme development	86/3832	272/23174	5.31849e-10	3.26875e-06	1.17995e-08	Fn1/Bcl2/Notch1/Eng/Itga4/Frzb/Nckap1/Sema6d/Bmp7/Edn3/Lama5/Hey1/Wwtr1/Sfrp2/Efna1/Adam15/Lef1/Sdcbp/Heyl/Trim62/Sema3d/Nos3/Htt/Tgfbr3/Loxl3/Kbtbd8/Ret/Strap/Dact3/Plaur/Tgfb1/Dll3/Hpn/Tgfb1i1/Fgfr1/Ednra/Fendrr/Foxf1/Nrp1/Phldb1/Smad3/Dag1/Tgfbr2/Hey2/Gja1/Pofut2/Erbb3/Anxa6/Rflnb/Nog/Tmem100/Meox1/Axin2/Sox9/Six4/Hif1a/Zfp36l1/Foxc1/Edn1/Sema4d/Foxd1/Sema3g/Bmp4/Rgcc/Ednrb/Dab2/Sema5a/Has2/My…	86
GO:0016125	BP	GO:0016125	sterol metabolic process	52/3832	134/23174	5.41208e-10	3.32627e-06	1.19311e-08	Acadl/Cyp27a1/Hdlbp/Cyb5r1/Soat1/Lbr/Abca2/Cat/Gba/Ttc39b/Lepr/Dhcr24/Ldlrap1/Cyp51/Insig1/Mvk/Scarb1/Dgat2/Smpd1/Cyb5r2/Apobr/Dhcr7/Cln8/Erlin2/Msmo1/Mvd/Ldlr/Aplp2/Cln6/Lipc/Lss/Lrp1/Sec14l2/Il4/Pmp22/Nfe2l1/Erg28/Hmgcs1/Prkaa1/Sqle/Srebf2/Cyb5r3/Lima1/App/Lmf1/Abcg1/Npc1/Fech/Lrp5/Lipa/Ebp/Nsdhl	52
GO:0061572	BP	GO:0061572	actin filament bundle organization	61/3832	169/23174	5.69543e-10	3.50041e-06	1.24768e-08	Tmeff2/Fam171a1/Prkcq/Aif1l/Id1/Src/Rhoc/Synpo2/Kank4/Wasf2/Asap3/Arhgef10l/Limch1/Pxn/Eln/Rac1/Tac1/Cald1/Zyx/Arhgef5/Eps8/Actn4/Nox4/Arap1/Swap70/Arhgef10/Dlc1/Cx3cl1/Nrp1/Rdx/Smad3/Tpm1/Rhoa/Ccn2/Marcks/Pcdh15/Hsp90b1/Shroom1/Arhgef15/Pfn1/Rflnb/Tnfaip1/Rnd2/Baiap2/Rock2/Actn1/Pik3r1/Sorbs3/Lcp1/Rgcc/Rapgef3/Lima1/Ppm1f/Phldb2/Cd47/Prkn/Kank3/Rhod/Add3/Pls3/Arhgap6	61
GO:0016525	BP	GO:0016525	negative regulation of angiogenesis	46/3832	112/23174	5.94632e-10	3.65461e-06	1.2945e-08	Adgrb3/Stat1/Col4a3/Notch1/Creb3l1/Cd59a/Spred1/Dll4/Ism1/Klf4/Tek/Tie1/Adgrb2/Epha2/Emilin1/Gtf2i/Serpine1/Stard13/Ptn/Adamts9/Gpr4/Pde3b/Col4a2/Angpt2/Klf2/Hhip/Agt/Map2k5/Rhoa/Tbxa2r/Sparc/Epn2/Nf1/Rock2/Meox2/Foxc1/Stab1/Mmrn2/Rgcc/Spry2/Adgrb1/Card10/Adamts1/Ecscr/Sema6a/Pgk1	46
GO:0090288	BP	GO:0090288	negative regulation of cellular response to growth factor stimulus	54/3832	142/23174	6.10988e-10	3.75513e-06	1.32018e-08	Cflar/Gata3/Notch1/Adamtsl2/Hspa5/Lrp2/Creb3l1/Cd59a/Fbn1/Sulf2/Pmepa1/Skil/Spry1/Sfrp2/Emilin1/Htra3/Tgfbr3/Fgfrl1/Cav2/Cav1/Hipk2/Strap/Cadm4/Tgfb1i1/Htra1/Adgra2/Snx25/Glg1/Agt/Dnm2/Snx1/Cd109/Chst11/Xbp1/Vwc2/Epn2/Nog/Adam17/Sostdc1/Mmrn2/Spry2/Adamts12/Chrd/Nrros/Xdh/Ltbp1/Spry4/Sema6a/Fbn2/Ldlrad4/Tcf7l2/Cask/Apln/Chrdl1	54
GO:0060070	BP	GO:0060070	canonical Wnt signaling pathway	87/3832	277/23174	6.14008e-10	3.77369e-06	1.32018e-08	Sox17/Gata3/Nrarp/Notch1/Frzb/Usp8/Src/Sulf2/Tbl1xr1/Wwtr1/Siah2/Sfrp2/Lef1/Dkk2/Nfkb1/Vcp/Klf4/Rspo1/Hdac1/Ptpru/Fgfr3/Fzd10/Fzd9/Cav1/Tcf7l1/Mitf/Wnt5b/Wnk1/Ptpro/Caprin2/Dact3/Trpm4/Lrrk1/Fzd4/Adgra2/Nkd1/Cyld/Cdh3/Disc1/Smad3/Nphp3/Limd1/Bicc1/Lgr5/Kremen1/Znrf3/Egfr/Tcf7/Shisa6/Tmem88/Mks1/Nog/Axin2/Sox9/Slc9a3r1/Notum/Sostdc1/Ryr2/Ror2/Nkd2/Zbed3/Myh6/Lats2/Sox7/Scel/Gpc5/Dab2/Sema5a/Fzd6/M…	87
GO:0014065	BP	GO:0014065	phosphatidylinositol 3-kinase signaling	50/3832	127/23174	6.39755e-10	3.93193e-06	1.36185e-08	Serpine2/Gata3/Prr5l/Cat/Rasgrp1/Ppp1r16b/Pear1/Klf4/Tek/Fgr/Kdr/Pdgfa/Flt1/Sirt2/Ntrk3/Pik3c2a/Agt/Pdgfd/Cbl/Il18/Pik3cb/Fyn/Unc5b/Agap2/Erbb3/Xbp1/Egfr/Flt4/Pik3r6/C1qbp/Nf1/Sox9/Slc9a3r1/Pik3cg/Zfp36l1/Entpd5/Edn1/Sema4d/F2rl1/F2r/Pik3r1/Htr2a/Ptk2/Pdgfb/Prr5/Nlrc3/Slc9a3r2/Ppard/Mydgf/Jak2	50
GO:0072006	BP	GO:0072006	nephron development	55/3832	146/23174	6.41208e-10	3.94086e-06	1.36185e-08	Eya1/Cflar/Wnt6/Col4a3/Bcl2/Gata3/Notch1/Cd44/Sulf2/Bmp7/Lama5/Hey1/Fat4/Wwtr1/Tek/Heyl/Hes5/Mpv17/Pdgfra/Sec61a1/Ret/Ptpro/Gpr4/Tgfb1/Angpt2/Irx3/Agt/Pdgfd/Nog/Wnk4/Sox9/Six4/Nid1/Agtr1a/Foxc1/Klhl3/Adamts16/Irx1/Irx2/Foxd1/Bmp4/Myc/Pdgfb/Wnt7b/Hes1/Dlg1/Dll1/Sox8/Notch3/Vegfa/Greb1l/Plce1/Gpc3/Maged1/Cited1	55
GO:0038127	BP	GO:0038127	ERBB signaling pathway	44/3832	105/23174	6.48962e-10	3.98852e-06	1.36996e-08	Adora1/Ptprj/Rassf2/Src/Mmp9/Cpne3/Errfi1/Zfyve28/Areg/Hip1r/Hip1/Tgfa/Rab7/Plaur/Tgfb1/Gab1/Cdh13/Agt/Aplp2/Cbl/Ptprr/Erbb3/Egfr/Efemp1/Rhbdf1/Hap1/Dusp3/Sox9/Rhbdf2/Chmp6/Adam17/Itga1/Arf4/Ptk2/App/Adgre4/Fer/Socs5/Nrg2/Hbegf/Sh3tc2/Ptpn2/Neurl1a/Afap1l2	44
GO:2000181	BP	GO:2000181	negative regulation of blood vessel morphogenesis	47/3832	116/23174	6.68939e-10	4.1113e-06	1.40363e-08	Adgrb3/Stat1/Col4a3/Notch1/Creb3l1/Cd59a/Spred1/Dll4/Ism1/Klf4/Tek/Tie1/Adgrb2/Epha2/Emilin1/Gtf2i/Serpine1/Stard13/Ptn/Adamts9/Gpr4/Pde3b/Col4a2/Angpt2/Klf2/Hhip/Agt/Map2k5/Rhoa/Tbxa2r/Sparc/Epn2/Nf1/Rock2/Meox2/Foxc1/Stab1/Mmrn2/Rgcc/Spry2/Adgrb1/Card10/Adamts1/Xdh/Ecscr/Sema6a/Pgk1	47
GO:0001666	BP	GO:0001666	response to hypoxia	69/3832	202/23174	7.01677e-10	4.31251e-06	1.4635e-08	Bcl2/Adora1/Cd34/Notch1/Eng/Dpp4/Scn2a/Cat/Tm9sf4/Ptgis/Chrna4/Tek/Plk3/Slc9a1/Ece1/Cpeb2/Cd38/Sod3/Kdr/Rest/Flt1/Cav1/Kcnd2/Itpr1/Itpr2/Sirt2/Chrna7/Cpeb1/Ucp2/Prkcb/Plat/Eif4ebp1/Hmox1/Ednra/Mmp2/Hyou1/Il18/Sdhd/Cryab/Smad3/Map2k1/Rora/Higd1a/Limd1/Hsp90b1/Alkbh5/Nos2/Nf1/P4hb/Rock2/Adam17/Hif1a/Zfp36l1/Slc8a3/Acot2/Ryr2/Edn1/Camk2g/Rgcc/Myc/Tmbim6/Fndc1/Ppard/Vegfa/Epas1/Cybb/Fundc1/Pdk3/Pgk1	69
GO:0051017	BP	GO:0051017	actin filament bundle assembly	60/3832	166/23174	7.37933e-10	4.53533e-06	1.52996e-08	Tmeff2/Fam171a1/Prkcq/Aif1l/Id1/Src/Rhoc/Synpo2/Kank4/Wasf2/Asap3/Arhgef10l/Limch1/Pxn/Eln/Rac1/Tac1/Cald1/Zyx/Arhgef5/Eps8/Actn4/Nox4/Arap1/Swap70/Arhgef10/Dlc1/Cx3cl1/Nrp1/Rdx/Smad3/Tpm1/Rhoa/Ccn2/Marcks/Pcdh15/Hsp90b1/Shroom1/Arhgef15/Pfn1/Tnfaip1/Rnd2/Baiap2/Rock2/Actn1/Pik3r1/Sorbs3/Lcp1/Rgcc/Rapgef3/Lima1/Ppm1f/Phldb2/Cd47/Prkn/Kank3/Rhod/Add3/Pls3/Arhgap6	60
GO:1905475	BP	GO:1905475	regulation of protein localization to membrane	65/3832	186/23174	7.45586e-10	4.58237e-06	1.53668e-08	Arpc2/Acsl3/Pid1/Dpp10/Ppp2r5a/Gsn/Stom/Prnp/Kcnb1/Tnik/Prkci/Slc7a11/Rap1a/Tmem59/Ldlrap1/Epha2/Rer1/Dpp6/Fzd9/Cnpy4/Ptn/Tcaf2/Vamp8/Shisa7/Tgfb1/Pdcd5/Mesd/Rhog/Stx4a/Cd81/Necab2/Itgb1/Ptpn9/Map2k1/Rab11a/Adam10/Myo5a/Dag1/Epm2a/Fyn/Gopc/Lrp1/Egfr/Sptbn1/Arhgap44/Shisa6/Nlgn2/Myo1c/Cltc/Arf6/Nkd2/Pik3r1/Camk2g/Gpc5/Gpc6/Dab2/Grasp/Crkl/Dlg1/Prkn/Pkdcc/Rhoq/Nrxn1/Stx3/Gpc3	65
GO:0007173	BP	GO:0007173	epidermal growth factor receptor signaling pathway	41/3832	95/23174	8.42713e-10	5.17931e-06	1.7171e-08	Adora1/Ptprj/Rassf2/Src/Mmp9/Errfi1/Zfyve28/Areg/Hip1r/Hip1/Tgfa/Rab7/Plaur/Tgfb1/Gab1/Cdh13/Agt/Aplp2/Cbl/Erbb3/Egfr/Efemp1/Rhbdf1/Hap1/Dusp3/Sox9/Rhbdf2/Chmp6/Adam17/Itga1/Arf4/Ptk2/App/Adgre4/Fer/Socs5/Nrg2/Hbegf/Ptpn2/Neurl1a/Afap1l2	41
GO:0098739	BP	GO:0098739	import across plasma membrane	46/3832	113/23174	8.42982e-10	5.18097e-06	1.7171e-08	Slc9a2/Slc39a10/Per2/Sept2/Atp1a2/Kcnj10/Slc30a1/Slc39a12/Lrp2/Prnp/Slc7a11/Atp1a1/Kcnd3/Slc39a8/Slc31a1/Slc9a1/Iscu/Slc12a9/Slc7a1/Kcnj8/Abcc9/Slc8a2/Trpm4/Arl6ip1/Cln8/Slc12a4/Agt/Slc9a9/Fyn/Slc1a6/Hcn2/Atp1b2/Kcnj16/Kcnj2/Slc8a3/Hfe/Agtr1a/Slc39a14/Kcnj4/Kcnj6/Kcnj15/Slc12a2/Slc3a2/Slc1a1/Slc9a7/Slc7a3	46
GO:0010721	BP	GO:0010721	negative regulation of cell development	111/3832	385/23174	8.78833e-10	5.4013e-06	1.77972e-08	Itm2c/Bcl2/Rab29/Gpr37l1/Tnr/Dnm3/Il15ra/Vim/Notch1/Grb14/Frzb/Rtn4rl2/Eif2ak4/B2m/Sema6d/Fbn1/Nkx2-2/Id1/Bmp7/Hey1/Nlgn1/Rapgef2/Efna1/Cers2/Nbn/Brinp1/Cdkn2b/Dab1/Id3/Rap1gap/Hes5/Sema3d/Fgfr3/Cd38/Rest/Trpv4/Cav1/Ptprz1/Ptn/Cntn4/Tgfb1/Dll3/Sirt2/Actn4/Mag/Ntrk3/Inppl1/Dennd5a/Xylt1/Hook3/Calr/Irx3/Nrp1/Itgb1/Fat3/Ldlr/Prkcsh/Lingo1/Cspg4/Ptpn9/Neo1/Prtg/Rhoa/Zfp365/Appl2/Hmga2/Lrp1/Kremen1/Ef…	111
GO:0019216	BP	GO:0019216	regulation of lipid metabolic process	100/3832	336/23174	9.244e-10	5.68136e-06	1.86117e-08	Acadl/Acsl3/Adora1/Pla2g4a/Ptgs2/Capn2/Ppp2r5a/Ccdc3/Src/Fitm2/Tbl1xr1/Atp1a1/Vav3/Nfkb1/Ccn1/Lyn/Ccnc/Nr4a3/Ttc39b/Tek/Zfp69/Zmpste24/Fabp3/Fgr/Cdc42/Insig1/Fgfr3/Pdgfra/Kit/Rest/Igfbp7/Acacb/Scarb1/Pdgfa/Rac1/Flt1/Cav1/Snca/Eif2ak3/Hrh1/Opa3/Tgfb1/Lsr/Rab38/Dgat2/Pde3b/Pnpla2/Igf2/Cd81/Dhcr7/Irs2/Erlin2/Asah1/Mlycd/Agt/Ldlr/Angptl8/Lactb/Rora/Elovl5/Abhd5/Appl2/Sec14l2/Adora2b/Nfe2l1/Ormdl3/Sta…	100
GO:0051098	BP	GO:0051098	regulation of binding	114/3832	399/23174	9.37633e-10	5.76269e-06	1.87697e-08	Bag2/Mitd1/Per2/Bcl2/Ralb/Nucks1/Gata3/Edf1/Itga4/Traf6/Hipk3/B2m/Ddrgk1/Fkbp1a/Id1/Ccm2l/Src/Mmp9/Hey1/Nmd3/Rapgef2/Adam15/Lef1/Ufl1/Zfp462/Klf4/Txn1/Zmpste24/Epb41/Ldlrap1/Id3/Cdc42/Rap1gap/Eno1/Agrn/Sri/Eif2b4/Lrpap1/Rest/Tgfbr3/Hip1r/Lfng/Ica1/Cav1/Cald1/Hipk2/Ephb6/Eif2ak3/Dysf/Camk1/Plxnd1/Caprin2/Plaur/Tgfb1/Sirt2/Spon1/Eif3c/Hmox1/Cyld/Amfr/Ripor1/Zfpm1/Disc1/Mmp8/Aplp2/Tirap/Smad3/Anxa2/…	114
GO:0032412	BP	GO:0032412	regulation of ion transmembrane transporter activity	79/3832	245/23174	9.56714e-10	5.87996e-06	1.90422e-08	Hecw2/Atp1a2/Stom/Stk39/Lrrc55/Prnp/Plcb1/Fkbp1a/Mmp9/Chrna4/Oprl1/Nlgn1/S100a1/Asph/Pde4b/Slc9a1/Selenon/Agrn/Sri/Abcb1a/Htt/Stim2/Anxa3/Pkd2/Nipsnap2/Cav1/Tcaf2/Dysf/Wnk1/Kcna1/Cracr2a/Shisa7/Fxyd5/Grm5/Stim1/Kcnq1/Cacna1a/Jph3/Dnm2/Myo5a/Gnb5/Rasgrf1/Gpd1l/Cnksr3/Akap7/Gopc/Shisa6/Pirt/Atp1b2/Nlgn2/Asic2/Hap1/Wnk4/Cacng4/Rgs9/Slc9a3r1/Ryr2/Ripk1/Glrx/Homer1/Pde4d/Slmap/Cacna1d/Bmp4/Fgf14/Arc/R…	79
GO:0050890	BP	GO:0050890	cognition	97/3832	323/23174	9.72333e-10	5.97596e-06	1.92431e-08	Adgrb3/Abi2/En1/Adora1/Ptgs2/Tnr/Ncstn/Atp1a2/Itga8/Grin1/Tanc1/Scn2a/Gpr155/Rag1/Eif2ak4/Map1a/Gatm/Prnp/Lrrn4/Plcb1/Gnas/Chrna4/Oprl1/Slc7a11/Bche/Chd7/Brinp1/Ppt1/Htt/Drd5/Atp8a1/Kit/Cux2/Fzd9/Nptx2/Tac1/Ptprz1/Ptn/Chl1/Slc6a1/Hrh1/Shisa7/Slc8a2/Chrna7/Grm5/Igf2/Cln8/Atxn1l/Jph3/Agt/Itgb1/Ldlr/Stra6/Foxb1/Epm2a/Sgk1/S100b/Abca7/Egfr/Slc1a4/Adra1b/Gm2a/Nf1/Nog/Ppp1r1b/Kat2a/C1ql1/Lamb1/Hif1a/Sl…	97
GO:0070372	BP	GO:0070372	regulation of ERK1 and ERK2 cascade	93/3832	306/23174	1.08589e-09	6.67389e-06	2.13691e-08	Cflar/Fn1/Ackr3/Phlpp1/Notch1/Cd44/Spred1/Rasgrp1/Dusp15/Src/Spry1/E130311K13Rik/Rapgef2/Rap1a/Ccn1/Lyn/Klf4/Tek/Ece1/Epha2/Errfi1/Emilin1/Fgfr3/Pdgfra/Kit/Kdr/Trpv4/Pdgfa/Flt1/Cav1/Gpnmb/Nod1/Cd4/Prkd2/Tgfb1/Rras/Chrna7/Pde8a/Nox4/St5/Ccl25/Gas6/Dusp26/Mfhas1/Ednra/Cx3cl1/Necab2/Nrp1/Pdgfd/Icam1/Epor/Tirap/Map2k1/Gnai2/Ccr1/Akap12/Cnksr3/Ccn2/Abca7/Timp3/Dusp6/Ptprr/Lrp1/Xbp1/Egfr/Flt4/Tnip1/Dus…	93
GO:0008202	BP	GO:0008202	steroid metabolic process	90/3832	293/23174	1.1092e-09	6.81713e-06	2.17051e-08	Acadl/Cyp27a1/Hdlbp/Cyb5r1/Soat1/Lbr/Hsd11b1/Abca2/Hsd17b12/Cat/Tiparp/Gba/Atp1a1/Nfkb1/Ttc39b/Lepr/Dhcr24/Ldlrap1/Cyp51/Insig1/Pdgfra/Kit/Rest/Igfbp7/Hsd17b11/Mvk/Scarb1/Hrh1/Dgat2/Smpd1/Cyb5r2/Adm/Apobr/Igf2/Dhcr7/Cln8/Fgfr1/Erlin2/Asah1/Msmo1/Sdr42e1/Mvd/Agt/Ldlr/Aplp2/Slc37a4/Cln6/Rora/Lipc/Sgpl1/Lss/Lrp1/Sec14l2/Il4/Adora2b/Pmp22/Dhrs11/Nfe2l1/Stard3/Stat5b/Erg28/Akr1c14/Agtr1a/Pde8b/Hmgcs1/…	90
GO:0001936	BP	GO:0001936	regulation of endothelial cell proliferation	50/3832	129/23174	1.21072e-09	7.4411e-06	2.35594e-08	Stat1/Nrarp/Egfl7/Eng/Itga4/Aplnr/Dll4/Ppp1r16b/Ecm1/F3/Tek/Fgfr3/Fgfbp1/Kdr/Flt1/Cav2/Cav1/Dysf/Gata2/Cxcl12/Prkd2/Emc10/Nr2f2/Igf2/Fgfr1/Hmox1/Cdh13/Gja1/Flt4/Sparc/Adora2b/Nf1/Stat3/Adam17/Agtr1a/Bmp4/Egr3/Rgcc/Rictor/Sema5a/Pdgfb/Acvrl1/Nr4a1/Vegfa/Mydgf/Xdh/Jcad/Atp5a1/Apln/Plxnb3	50
GO:0002262	BP	GO:0002262	myeloid cell homeostasis	62/3832	176/23174	1.26671e-09	7.78522e-06	2.44069e-08	Smap1/Stat1/Ncstn/Itpkb/Flvcr1/Gata3/Cd44/Lmo2/B2m/Plcb1/Mecom/Slc7a11/Lyn/Ptbp3/Pde4b/Tal1/Prdx1/Kit/Tgfbr3/Sh2b3/Bpgm/Gata2/Gpi1/Rps17/Ampd3/Sox6/Ank1/Mfhas1/Jak3/Klf2/Hmox1/Zfpm1/Jam3/Ets1/Slc37a4/Il18/Pik3cb/P4htm/Nfe2l1/Stat5b/Stat3/Jmjd6/Adam17/Id2/Hif1a/Mthfd1/Zfp36l1/Inhba/Tmem14c/Sfxn1/Smad5/Bmp4/Bcl6/Bak1/Adgrf5/Vegfa/Epas1/Fech/Ptpn2/Anxa1/Jak2/Heph	62
GO:0050880	BP	GO:0050880	regulation of blood vessel size	61/3832	172/23174	1.26829e-09	7.79491e-06	2.44069e-08	Per2/Adora1/Ptgs2/Atp1a2/Edn3/Npr1/Rap1gds1/Ece1/Nos3/Drd5/Cd38/Kdr/Tgfbr3/Cav1/Mgll/Hrh1/Kcna5/Trpm4/P2ry2/Adm/Mrvi1/Adrb3/Ednra/Mmp2/Cx3cl1/Agt/Icam1/Map2k1/Manf/Rhoa/Gpx1/Atg5/Gja1/Tbxa2r/Egfr/Adra1b/Adora2b/Asic2/Ace/Rock2/Dock4/Hif1a/Chga/Agtr1a/Foxc1/Edn1/F2rl1/F2r/Itga1/Gch1/Dock5/Htr2a/Ednrb/Ptk2/Pdgfb/Ppard/Prkg1/Acta2/Add3/Dusp5/Apln	61
GO:0014706	BP	GO:0014706	striated muscle tissue development	124/3832	448/23174	1.51702e-09	9.32363e-06	2.88891e-08	Sox17/Eya1/Col19a1/Fhl2/Cflar/Casp8/Dner/Bcl2/Tnnt2/Hlx/Nebl/Notch1/Eng/Lrp2/Dll4/Cops2/Gpcpd1/Fkbp1a/Ccm2l/Bmp7/Hey1/Skil/Mbnl1/Lmna/Col11a1/Lef1/Pdlim5/Acadm/Chd7/Zmpste24/Heyl/Akirin1/Slc9a1/Selenon/Cdc42/Hspg2/Sgcb/Pdgfra/Tgfbr3/Tbx3/Eln/Cav2/Cav1/Vamp5/Dysf/Adamts9/Ybx3/Tgfb1/Sirt2/Nphs1/Myh14/Nr2f2/Akap13/Nox4/Sox6/Fgfr1/Sgcz/Slc25a4/Smad1/Zfpm1/Agt/Itgb1/Epor/AW551984/Usp2/Smad3/Tpm1/Foxl2…	124
GO:0045665	BP	GO:0045665	negative regulation of neuron differentiation	82/3832	260/23174	1.51779e-09	9.32833e-06	2.88891e-08	Itm2c/Rab29/Gpr37l1/Tnr/Dnm3/Il15ra/Vim/Notch1/Rtn4rl2/Eif2ak4/B2m/Sema6d/Nkx2-2/Id1/Bmp7/Hey1/Nlgn1/Rapgef2/Efna1/Cers2/Nbn/Dab1/Id3/Rap1gap/Hes5/Sema3d/Cd38/Rest/Trpv4/Cav1/Ptprz1/Cntn4/Mag/Inppl1/Dennd5a/Xylt1/Calr/Irx3/Nrp1/Itgb1/Fat3/Prkcsh/Cspg4/Ptpn9/Neo1/Rhoa/Zfp365/Lrp1/Kremen1/Efemp1/Pmp22/Ntn1/Sox9/Aatk/Adam17/Id2/Ifrd1/Arf6/Bag5/Sema4d/Ptprg/Sema3g/Ednrb/Dab2/Sema5a/Ptk2/Lrrk2/Hes1/Se…	82
GO:0043087	BP	GO:0043087	regulation of GTPase activity	90/3832	295/23174	1.62149e-09	9.96565e-06	3.06951e-08	Arfgef1/Tbc1d8/Dock10/Sh3bp4/Dennd1b/Rabgap1l/F11r/Rgs7/Rab3gap2/Rsu1/Dennd1a/Pkp4/Itga6/Arhgap1/Rasgrp1/Cd40/Prex1/Gnas/Spry1/Rapgef2/Rap1a/Vav3/Rap1gds1/Tbc1d2/Asap3/Rap1gap/Epha2/Agrn/Tbc1d1/Arhgap24/Evi5/Fzd10/Cav2/Arhgef5/Iqsec1/Plxnd1/Wnk1/Arhgap35/Rasip1/Ntrk3/Arap1/Rhog/Evi5l/Ccl25/Grtp1/Rasa3/Arhgef10/Cx3cl1/Itgb1/Icam1/Rdx/Map2k1/Gnb5/Rasgrf1/Lims1/Arhgap44/Sgsm2/Nf1/Rundc1/Arhgap27/Pec…	90
GO:0007179	BP	GO:0007179	transforming growth factor beta receptor signaling pathway	59/3832	165/23174	1.64028e-09	1.00812e-05	3.0818e-08	Itga8/Adamtsl2/Eng/Hspa5/Fbn1/Dusp15/Src/Pmepa1/Skil/Smad9/Sdcbp/Cdkn2b/Emilin1/Htra3/Tgfbr3/Pxn/Cav2/Cav1/Hipk2/Zyx/Strap/Tgfb1/Ltbp4/Furin/Lrrc32/Tgfb1i1/Htra1/Adam9/Snx25/Smad1/Gipc1/Cdh5/Glg1/Dnm2/Smad3/Snx1/Cd109/Tgfbr2/Ptprk/Chst11/Appl2/Xbp1/Adam17/Fut8/Dusp22/Smad5/Map3k1/Fermt2/Dab2/Ptk2/Acvrl1/Cldn5/Nrros/Ltbp1/Zeb1/Lox/Fbn2/Ldlrad4/Cited1	59
GO:0035150	BP	GO:0035150	regulation of tube size	61/3832	173/23174	1.64568e-09	1.01143e-05	3.0818e-08	Per2/Adora1/Ptgs2/Atp1a2/Edn3/Npr1/Rap1gds1/Ece1/Nos3/Drd5/Cd38/Kdr/Tgfbr3/Cav1/Mgll/Hrh1/Kcna5/Trpm4/P2ry2/Adm/Mrvi1/Adrb3/Ednra/Mmp2/Cx3cl1/Agt/Icam1/Map2k1/Manf/Rhoa/Gpx1/Atg5/Gja1/Tbxa2r/Egfr/Adra1b/Adora2b/Asic2/Ace/Rock2/Dock4/Hif1a/Chga/Agtr1a/Foxc1/Edn1/F2rl1/F2r/Itga1/Gch1/Dock5/Htr2a/Ednrb/Ptk2/Pdgfb/Ppard/Prkg1/Acta2/Add3/Dusp5/Apln	61
GO:0042110	BP	GO:0042110	T cell activation	133/3832	491/23174	1.76971e-09	1.08766e-05	3.29635e-08	Igfbp2/Bcl2/Rab29/Ncstn/Itpkb/Hlx/Gata3/Prkcq/Nrarp/Gsn/Dpp4/Itgav/Rag1/Traf6/Cd44/Rasgrp1/Eif2ak4/Dll4/B2m/Prnp/Fkbp1a/Prex1/Cebpb/Adrm1/Vcam1/Lef1/Bcl10/Chd7/Wwp1/Lepr/Ddost/Tnfrsf1b/Txk/Kit/P2rx7/Mad1l1/Lfng/Cav1/Ephb6/Gimap1/Gpnmb/Loxl3/Cxcl12/Clec4e/Cd4/Mill2/Relb/Clptm1/Bcl3/Tgfb1/Kdelr1/Chrna7/Lrrc32/Lmo1/Il4ra/Spn/Itgal/Cd151/Igf2/Cd81/Jak3/Cyld/Cbfb/Psmb10/Icam1/Il18/Cd276/Smad3/Rora/Cga…	133
GO:1901888	BP	GO:1901888	regulation of cell junction assembly	37/3832	83/23174	1.85601e-09	1.1407e-05	3.43362e-08	Ptprj/Src/Rapgef2/Rap1a/Tek/Col16a1/Epha2/Limch1/Kdr/Rac1/Cav1/Dlc1/Prkaca/Agt/Nrp1/Peak1/Smad3/Gja1/Lims1/Lrp1/Myo1c/Dusp3/Ace/Rock2/Prkch/Dusp22/Enpp2/Ptk2/Acvrl1/Snai2/Ppm1f/Apod/Phldb2/Vegfa/Rhod/Slk/Arhgap6	37
GO:0050900	BP	GO:0050900	leukocyte migration	100/3832	340/23174	1.86312e-09	1.14507e-05	3.43362e-08	Il1r1/Adora1/Mia3/Cd34/Gata3/Stk39/Itga6/Itga4/Ptprj/Plcb1/Mmp9/Prex1/Edn3/S100a8/S100a9/Ecm1/Csf1/Vav3/Vcam1/Lyn/Pde4b/Akirin1/Cdc42/Tnfrsf18/Emilin1/Wdr1/Kit/Cmklr1/Trpv4/Sbds/Serpine1/Rac1/Flt1/Podxl/Ptn/Arhgef5/Dysf/Tafa4/Jagn1/Hrh1/Cxcl12/Wnk1/Il17ra/Cd9/Ptpro/Eps8/Tgfb1/Trpm4/Swap70/Spn/Cd81/Ccl25/Gas6/Ednra/Calr/Cx3cl1/Itgb1/Pdgfd/Icam1/Jam3/Tirap/Slc37a4/Adam10/Rhoa/Itga9/Ccr1/Madcam1/Stk…	100
GO:0021782	BP	GO:0021782	glial cell development	44/3832	108/23174	1.88939e-09	1.16122e-05	3.46371e-08	Ncstn/Kcnj10/Vim/Nkx2-2/S100a8/S100a9/Tspan2/Ror1/Eif2b3/Hes5/Adam22/Eif2b4/Fgfr3/Wasf3/Tgfb1/Sirt2/Mag/Ntrk3/Arhgef10/Fa2h/Agt/Ldlr/Dag1/Adgrg6/Lrp1/Egfr/Pmp22/Nf1/Omg/Cntnap1/Id2/Mpp5/Ror2/Zfp488/Sox10/Pdgfb/Nrros/App/Dll1/Sh3tc2/Myrf/Tcf7l2/Dmd/Plp1	44
GO:0045454	BP	GO:0045454	cell redox homeostasis	31/3832	63/23174	1.93886e-09	1.19162e-05	3.53578e-08	Txndc9/Qsox1/Dnajc10/Tmx2/Pdia3/Selenot/Erp44/Txn1/Txndc12/Prdx1/Pdia4/Selenos/Glrx3/Gsr/Gpx1/P4hb/Pdia6/Dld/Tmx1/Txndc5/Txndc15/Glrx/Txndc16/Ero1l/Txnrd2/Pdia5/Txndc2/Tmx3/Prdx5/Prdx3/Prdx4	31
GO:0006888	BP	GO:0006888	ER to Golgi vesicle-mediated transport	48/3832	123/23174	1.97545e-09	1.21411e-05	3.58375e-08	Pgap1/Mia3/Sec23b/Vapb/Sec24d/Vcp/Stx17/Insig1/Preb/Nrbp1/Htt/Sec31a/Tmed5/Tmed2/Kdelr2/Bet1/Creb3l2/Tex261/Sec13/Kdelr1/Copb1/Ank1/Trappc11/Cope/Tmed1/Hyou1/Arcn1/Tmed3/Tmed4/Sec24a/Sar1b/Trappc1/Gosr2/Bcap29/Scfd1/Mia2/Tmed10/Lman2/Tmed9/Rnf139/Lrrk2/Tfg/Lmf1/Vapa/Tmed7/Lman1/Ier3ip1/Bcap31	48
GO:0001763	BP	GO:0001763	morphogenesis of a branching structure	77/3832	240/23174	2.00311e-09	1.23111e-05	3.6151e-08	Eya1/Wnt6/Bcl2/Nrarp/Notch1/Eng/Cd44/Dll4/Src/Tgm2/Bmp7/Lama5/Spry1/Fat4/Sfrp2/Csf1/Lef1/Tek/Epha2/Pdgfra/Kdr/Areg/Pxn/Tbx3/Pdgfa/Flt1/Plxnd1/Cxcl12/Mgp/Tgfb1/Rasip1/Adm/Col4a1/Fgfr1/Ednra/Hhip/Foxf1/Agt/Nrp1/Pgr/Ctsh/Dag1/Tgfbr2/Prdm1/Hmga2/Mks1/Nog/Etv4/Sox9/Six4/Agtr1a/Edn1/Adamts16/Foxd1/Bmp4/Spry2/Sema5a/Grhl2/Myc/Sox10/Pdgfb/Lrrk2/Snai2/Tbx1/Etv5/Dlg1/Sox8/Notch4/Vegfa/Lama1/Greb1l/Slc12a2/…	77
GO:0043434	BP	GO:0043434	response to peptide hormone	96/3832	323/23174	2.1514e-09	1.32225e-05	3.86271e-08	Lmbrd1/Stat1/Pid1/Scly/Inhbb/Nucks1/Prkcq/Grb14/Gatm/Ptpra/Plcb1/Src/Adrm1/Car2/Pld1/Prkci/Stxbp3/Nfkb1/Ggh/Nr4a3/Dennd4c/Leprot/Eif2b3/Sesn2/Slc9a1/Hadha/Eif2b4/Cpeb2/Tgfbr3/Trpv4/Pxn/Atp2a2/Vgf/Cav2/Cav1/Cpeb1/Inppl1/Pde3b/Prkcb/Ptpre/Igf2/Irs2/Eif4ebp1/Agt/Sesn3/Il18/Pkm/Myo5a/Nck1/Gnai2/Plcd1/Sgk1/Enpp1/Egr2/Appl2/Stat6/Cdk2/Xbp1/Grb10/Irf1/Trim16/Myo1c/Rps6kb1/Stxbp4/Stat5b/Stat3/Rab10/Rock2…	96
GO:0060348	BP	GO:0060348	bone development	74/3832	228/23174	2.3237e-09	1.42814e-05	4.15067e-08	Nab1/Rabgap1l/Fbn1/Src/Matn4/Sulf2/Gnas/Col20a1/Fat4/Smad9/Sfrp2/Impad1/Mmp16/Frem1/Tal1/Zmpste24/Matn1/Wasf2/Hspg2/Alpl/Vwa1/Insig1/Fgfr3/Kit/Kdr/Trpv4/Sh2b3/Sbds/Pdgfa/Lrrk1/Akap13/Serpinh1/Inppl1/Xylt1/Csgalnact1/Smad1/Glg1/Zfpm1/Ankrd11/Fli1/Sik3/Ppib/Anxa2/Col12a1/Rhoa/Nbeal2/Ltf/Tgfbr2/Gja1/Col6a2/Col6a1/Nab2/Anxa6/Sparc/Rflnb/Axin2/Sox9/Asxl2/Trip11/Foxc1/Sema4d/Smad5/Bmp4/Has2/Rarg/Zfp385…	74
GO:1903829	BP	GO:1903829	positive regulation of cellular protein localization	90/3832	297/23174	2.35641e-09	1.44825e-05	4.18762e-08	Arpc2/Acsl3/Dpp10/Rab29/Ptgs2/Prkcq/Stom/Wipf1/Prr5l/Map1a/Ddrgk1/Mavs/Prnp/Tm9sf4/Src/Kcnb1/Prkci/Nmd3/Syt11/Gpsm2/Asph/Tek/Plk3/Epb41/Sesn2/Cdc42/Epha2/Rer1/Dpp6/Cnpy4/Cav2/Ptn/Tcaf2/Eif2ak3/Camk1/Bicd1/Tgfb1/Pdcd5/Ptpn5/Mesd/Rhog/Chp2/Stx4a/Cd81/Gas6/Prkaca/Cyld/Ripor1/Necab2/Itgb1/Rdx/Ptpn9/Uaca/Rab11a/Myo5a/Tmem30a/Gpd1l/Epb41l2/Fyn/Abca7/Abhd17a/Lrp1/Xbp1/Egfr/Sptbn1/Sar1b/Kif3a/Nlgn2/Myo1c…	90
GO:0051924	BP	GO:0051924	regulation of calcium ion transport	84/3832	271/23174	2.43745e-09	1.49806e-05	4.30966e-08	Bcl2/Ptgs2/Atp1a2/Slc30a1/Grin1/Aplnr/Prnp/Fkbp1a/Oprl1/Trpc3/S100a1/Lyn/Chd7/Asph/Pde4b/Epb41/Slc9a1/Selenon/Sri/Nos3/Htt/Wfs1/Stim2/Pkd2/P2rx7/Orai1/Nipsnap2/Serpine1/Cav1/Adcyap1r1/Snca/Dysf/Itpr1/Cxcl12/Cd4/Cracr2a/Tgfb1/Hrc/Homer2/Stim1/Saraf/Jak3/Ednra/Cacna1a/Cx3cl1/Jph3/Agt/Icam1/Usp2/Anxa2/Myo5a/Gnb5/Gnai2/Rhoa/Ccr1/Fyn/Atg5/Gja1/Trpv3/Hap1/Ace/Rgs9/Pik3cg/Tspan13/Ryr2/Agtr1a/Homer1/F2r/…	84
GO:0002062	BP	GO:0002062	chondrocyte differentiation	47/3832	120/23174	2.51999e-09	1.54879e-05	4.4331e-08	Mia3/Matn4/Sulf2/Col20a1/Sfrp2/Ecm1/Col11a1/Impad1/Matn1/Hspg2/Vwa1/Creb3l2/Eif2ak3/Sox5/Tgfb1/Acan/Serpinh1/Sox6/Fgfr1/Glg1/Snx19/Smad3/Anxa2/Col12a1/Pth1r/Tgfbr2/Ccn2/Col6a2/Col6a1/Chst11/Efemp1/Anxa6/Rflnb/Axin2/Sox9/Trip11/Bmp4/Adamts12/Trps1/Chadl/Rarg/Snai2/Col11a2/Vit/Pkdcc/Rela/Vwa2	47
GO:0099173	BP	GO:0099173	postsynapse organization	65/3832	191/23174	2.56455e-09	1.57617e-05	4.48881e-08	Abi2/Dock10/Dnm3/Grin1/Tanc1/Prnp/Nlgn1/Mfn1/Slc7a11/Glrb/Efna1/Pdlim5/Ptprd/Wasf2/Cdc42/Rer1/Agrn/Cux2/Fzd9/Lrrc4/Ptn/Grid2/Lrrtm4/Caprin2/Shisa7/Lrrc4b/Chrna7/Ntrk3/Mesd/Nrp1/Sept7/Adam10/Fyn/Srgn/Zfp365/Abhd17a/Arhgap44/Shisa6/Nlgn2/Nptx1/Baiap2/Rock2/Arf6/Gphn/Actn1/Homer1/Arf4/Adgrb1/Arc/Nptxr/Lrrk2/Crkl/Ephb3/Etv5/Il1rap/Chmp2b/Nrxn1/Lrrtm2/Nrxn2/Abhd17b/Cask/Il1rapl1/Arhgef9/Nlgn3/Bhlhb9	65
GO:0001938	BP	GO:0001938	positive regulation of endothelial cell proliferation	39/3832	91/23174	2.75543e-09	1.69349e-05	4.76518e-08	Nrarp/Egfl7/Itga4/Aplnr/Ppp1r16b/Ecm1/F3/Fgfr3/Fgfbp1/Kdr/Cav2/Cav1/Dysf/Gata2/Cxcl12/Prkd2/Emc10/Igf2/Fgfr1/Hmox1/Cdh13/Flt4/Adora2b/Nf1/Stat3/Adam17/Agtr1a/Bmp4/Egr3/Rictor/Sema5a/Pdgfb/Acvrl1/Nr4a1/Vegfa/Mydgf/Jcad/Apln/Plxnb3	39
GO:0006643	BP	GO:0006643	membrane lipid metabolic process	58/3832	163/23174	2.77524e-09	1.70566e-05	4.76518e-08	Pgap1/Neu4/Pigc/Sccpdh/Degs1/St8sia6/Hacd1/Pigt/Gba/Cers2/Ugt8a/Elovl6/Sgms2/Ccn1/Elovl1/Kit/P2rx7/Pyurf/St8sia1/Acer3/Smpd1/Cln8/Asah1/Cers1/Fa2h/Pigyl/Hexa/Cln6/Hacd3/Elovl5/Elovl4/Map7/Smpd2/Smpdl3a/Sgpl1/Gal3st1/Gm2a/Pigl/Pigs/Ormdl3/Sptssa/Sgpp1/Sptlc2/Galc/Itgb8/Aldh5a1/Sptlc1/Serinc5/Elovl7/Samd8/Gpaa1/Naga/A4galt/Cerk/St3gal6/Gal3st3/Asah2/Sgms1	58
GO:0048660	BP	GO:0048660	regulation of smooth muscle cell proliferation	58/3832	163/23174	2.77524e-09	1.70566e-05	4.76518e-08	Stat1/Ptgs2/Rgs5/Calcrl/Traf6/Tgm2/Mmp9/Npr1/Nr4a3/Klf4/Ldlrap1/Hes5/Nos3/Cav1/Hmox1/Mmp2/Cx3cl1/Cdh13/Agt/Pdgfd/Il18/Gnai2/Tgfbr2/Map3k5/Igfbp3/Egfr/Rps6kb1/Stat5b/Id2/Nampt/Mnat1/Hif1a/Vipr2/Nqo2/Edn1/Pik3r1/Bmp4/Abcc4/Npr3/Trib1/Myc/Ptk2/Pdgfb/Irak4/Prkdc/Apod/Adamts1/Ppard/Cdkn1a/Notch3/Vegfa/Rab5a/Hbegf/Jak2/Prkg1/Pdcd4/Tcf7l2/Apln	58
GO:0051235	BP	GO:0051235	maintenance of location	95/3832	320/23174	2.77717e-09	1.70685e-05	4.76518e-08	Soat1/Hspa5/Gsn/Itgav/Aplnr/Ryr3/Slc30a4/Fbn1/Plcb1/Fkbp1a/Fitm2/Gpsm2/Slc30a7/Ankrd13c/Lyn/Chd7/Asph/Tln1/Txn1/Ttc39b/Selenon/Rer1/Sri/Insig1/Htt/Tapt1/Pkd2/Acacb/P2rx7/Scarb1/Kdelr2/Cav1/Snca/Dysf/Itpr1/Cd4/Itpr2/Tgfb1/Kdelr1/Tmem135/Dgat2/Pnpla2/Atp7b/Msr1/Ednra/Arl2bp/Cx3cl1/Jph3/Hexa/Tln2/Vps13c/Myo5a/Dag1/Abhd5/Syne1/Enpp1/Atg5/Gopc/Srgn/Os9/Anxa6/Gm2a/Pfn1/Lgals9/Hap1/Stat5b/Gaa/Nfkbia/Ryr…	95
GO:2001234	BP	GO:2001234	negative regulation of apoptotic signaling pathway	74/3832	229/23174	2.88304e-09	1.77192e-05	4.9226e-08	Sgk3/Eya1/Tmem14a/Cflar/Ackr3/Bcl2/Ptgs2/Pea15a/Itga6/Itgav/Ndufs3/Creb3l1/Cd44/Src/Mmp9/Siah2/Sfrp2/Lmna/Txndc12/Hdac1/Slc35f6/Htt/Wfs1/Serpine1/Cxcl12/Ybx3/Plaur/Selenos/Tnfrsf22/Ndufa13/Hmox1/Cx3cl1/Nrp1/Icam1/Hyou1/Map2k5/Map2k1/Bcl2a1a/Faim/Gnai2/Gpx1/Higd1a/Eya4/Fyn/Unc5b/Rtkn2/Pttg1ip/Agap2/Xbp1/Il4/Mapk7/Rps6kb1/Nog/Hif1a/Bag5/Ripk1/Vdac2/Bmp4/Dab2/Lrrk2/Tmbim6/Faim2/Zfp385a/Trap1/Mpv17l/…	74
GO:0045444	BP	GO:0045444	fat cell differentiation	76/3832	238/23174	3.21513e-09	1.97602e-05	5.46283e-08	Per2/Inhbb/Ptgs2/Ccdc3/Gata3/Itga6/Frzb/Plcb1/Cebpb/Tbl1xr1/Fndc3b/Mecom/Bbs12/Wwtr1/Sfrp2/Nr4a3/Klf4/Glis1/Sdf4/Steap4/Insig1/Plac8/Cmklr1/Trpv4/Creb5/Eif2ak3/Dysf/Gata2/Wnt5b/Tgfb1/Sirt2/Trpm4/Tgfb1i1/Ccnd1/Adrb3/Nudt7/Zfpm1/Angptl8/Smad3/Rora/Gpx1/Enpp1/Lama4/Egr2/Arid5b/Xbp1/Metrnl/Asxl2/Trib2/Id2/Arl4a/Zfp36l1/Jdp2/Ero1l/Htr2a/Trio/Zfpm2/Nr4a1/Zfp385a/Snai2/Cebpd/Hes1/Sox8/Ppard/Adgrf5/Vegfa…	76
GO:0045685	BP	GO:0045685	regulation of glial cell differentiation	40/3832	95/23174	3.24146e-09	1.9922e-05	5.48084e-08	Serpine2/Gpr37l1/Notch1/Mir219a-2/Ptpra/Nkx2-2/Nkx2-2os/Dusp15/Dab1/Hdac1/Tnfrsf1b/Hes5/Fgfr3/Wdr1/Ptn/Tgfb1/Dll3/Sirt2/Mag/Ntrk3/Il34/Ldlr/Lingo1/Dag1/Zfp365/Hmga2/Nf1/Nog/Id2/Il6st/Zfp488/Bmp4/Enpp2/Hes1/App/Olig2/Qk/Tnfrsf21/Rela/Tcf7l2	40
GO:0010876	BP	GO:0010876	lipid localization	105/3832	366/23174	3.34373e-09	2.05505e-05	5.62644e-08	Acsl3/Hdlbp/Pla2g4a/Soat1/Abca2/Slc27a4/Osbpl6/Itgav/Ano3/Atp8b4/Fitm2/Pltp/Abcd3/Pla2g12a/Sigmar1/Ttc39b/Mfsd2a/Fabp3/Ldlrap1/Abcb1a/Abcb4/Crot/Atp8a1/Acacb/Gltp/P2rx7/Scarb1/Tac1/Cav1/Repin1/Osbpl3/Dysf/Tmf1/Slco1c1/Slco1a4/Tmem135/Fzd4/Dgat2/Slco2b1/P2ry2/Apobr/Pnpla2/Irs2/Atp11a/Msr1/Acsl1/Agt/Ldlr/Stra6/Hexa/Anxa2/Lipc/Tmem30a/Slco2a1/Osbpl10/Abhd5/Enpp1/Abca7/Lrp1/Esyt1/Selenom/Igfbp3/Atp10…	105
GO:0048659	BP	GO:0048659	smooth muscle cell proliferation	59/3832	168/23174	3.5961e-09	2.21016e-05	5.94676e-08	Stat1/Ptgs2/Rgs5/Calcrl/Traf6/Tgm2/Mmp9/Npr1/Nr4a3/Klf4/Ldlrap1/Hes5/Nos3/Cav1/Hmox1/Ednra/Mmp2/Cx3cl1/Cdh13/Agt/Pdgfd/Il18/Gnai2/Tgfbr2/Map3k5/Igfbp3/Egfr/Rps6kb1/Stat5b/Id2/Nampt/Mnat1/Hif1a/Vipr2/Nqo2/Edn1/Pik3r1/Bmp4/Abcc4/Npr3/Trib1/Myc/Ptk2/Pdgfb/Irak4/Prkdc/Apod/Adamts1/Ppard/Cdkn1a/Notch3/Vegfa/Rab5a/Hbegf/Jak2/Prkg1/Pdcd4/Tcf7l2/Apln	59
GO:0050730	BP	GO:0050730	regulation of peptidyl-tyrosine phosphorylation	81/3832	260/23174	3.59756e-09	2.21106e-05	5.94676e-08	Adora1/Ptprj/Cd44/Prnp/Src/Cd40/Rap2b/Sfrp2/Efna1/Lyn/Tal1/Hdac1/Errfi1/Hes5/Tnfrsf18/Agrn/Yes1/Fgfr3/Zfyve28/Tec/Pdgfra/Kit/Areg/Sh2b3/Pdgfa/Cav2/Cav1/Ptprz1/Tgfa/Cd4/Tnfrsf1a/Cadm4/Tgfb1/Lrrk1/Nox4/Grm5/Igf2/Cd81/Gas6/Arl2bp/Agt/Nrp1/Itgb1/Pdgfd/Icam1/Aplp2/Cbl/Il18/Cspg4/Fyn/Erbb3/Egfr/Il4/Irf1/Vtn/Ace/Pecam1/Chmp6/Adam17/Dusp22/Sema4d/Il6st/Htr2a/Ghr/Rictor/Enpp2/Pdgfb/Cntn1/Itga5/Hes1/Tnk2/P…	81
GO:0035296	BP	GO:0035296	regulation of tube diameter	57/3832	160/23174	3.60238e-09	2.21402e-05	5.94676e-08	Per2/Adora1/Ptgs2/Atp1a2/Edn3/Rap1gds1/Ece1/Drd5/Cd38/Kdr/Cav1/Mgll/Hrh1/Kcna5/Trpm4/P2ry2/Adm/Mrvi1/Adrb3/Ednra/Mmp2/Cx3cl1/Agt/Icam1/Map2k1/Manf/Rhoa/Gpx1/Atg5/Gja1/Tbxa2r/Egfr/Adra1b/Adora2b/Asic2/Ace/Rock2/Dock4/Hif1a/Chga/Agtr1a/Edn1/F2rl1/F2r/Itga1/Gch1/Dock5/Htr2a/Ednrb/Ptk2/Pdgfb/Ppard/Prkg1/Acta2/Add3/Dusp5/Apln	57
GO:0097746	BP	GO:0097746	regulation of blood vessel diameter	57/3832	160/23174	3.60238e-09	2.21402e-05	5.94676e-08	Per2/Adora1/Ptgs2/Atp1a2/Edn3/Rap1gds1/Ece1/Drd5/Cd38/Kdr/Cav1/Mgll/Hrh1/Kcna5/Trpm4/P2ry2/Adm/Mrvi1/Adrb3/Ednra/Mmp2/Cx3cl1/Agt/Icam1/Map2k1/Manf/Rhoa/Gpx1/Atg5/Gja1/Tbxa2r/Egfr/Adra1b/Adora2b/Asic2/Ace/Rock2/Dock4/Hif1a/Chga/Agtr1a/Edn1/F2rl1/F2r/Itga1/Gch1/Dock5/Htr2a/Ednrb/Ptk2/Pdgfb/Ppard/Prkg1/Acta2/Add3/Dusp5/Apln	57
GO:0016485	BP	GO:0016485	protein processing	76/3832	239/23174	3.95883e-09	2.4331e-05	6.50435e-08	Bag2/Casp8/Serpine2/Ncstn/Capn2/Susd4/Gsn/Ldlrad3/Cd59a/Pcsk2/Src/Aph1a/F3/Prss12/Asph/Mmp16/Oma1/Dhcr24/Tmem59/Zmpste24/Inpp5b/Ece1/Ddi2/P2rx7/Serpine1/A2m/Fkrp/Hpn/Pcsk6/Furin/Sec11a/Spcs2/Spon1/Uqcrc2/Plat/Spcs3/Prkaca/Glg1/Birc3/Angptl8/Anxa2/Adam10/Ctsh/Vsir/Srgn/Rfx4/Metap2/Cpm/Atp23/Aebp1/Cyfip2/C1qbp/Cpd/Pitrm1/Ctla2a/Nkd2/Cast/Cln5/Rnf139/Myc/Myh9/Lrrk2/Dhh/Bak1/Notch4/Sec11c/Ccbe1/Myrf/…	76
GO:0003015	BP	GO:0003015	heart process	71/3832	218/23174	4.12395e-09	2.53458e-05	6.74384e-08	Atp2b4/Adora1/Tnnt2/Atp1a2/Scn1a/Src/Edn3/Wwtr1/S100a1/Atp1a1/Kcnd3/Pde4b/Zmpste24/Slc9a1/Cdc42/Agrn/Sri/Nos3/Atp2a2/Tac1/Cav1/Kcna5/Kcnj8/Dmpk/Trpm4/Hrc/Chrna7/Akap13/Nox4/Adm/Glrx3/Kcnq1/Sgcz/Agt/Tpm1/Cacna2d2/Gnai2/Gpx1/Gpd1l/Ccn2/Hey2/Fyn/Atg5/Gja1/Ctnna3/Smtn/Adra1b/Sgcd/Ace/Kcnj2/Gaa/Chga/Ryr2/Edn1/Smad5/Pik3r1/Pde4d/Cacna1d/Gch1/Myh6/Dlg1/Atp5j/Ehd3/Epas1/Dsc2/Hbegf/Slc1a1/Jak2/Prkg1/Apln/…	71
GO:0006470	BP	GO:0006470	protein dephosphorylation	75/3832	235/23174	4.18184e-09	2.57016e-05	6.80655e-08	Eya1/Slc39a10/Ptprn/Phlpp1/Bcl2/Ppp1r15b/Adora1/Dusp27/Dusp23/Ptpn14/Ppp2r5a/Nsmf/Dusp19/Ptprj/Dusp2/Ptpra/Fkbp1a/Dusp15/Ppp1r16b/Ptprt/Nceh1/Gba/Ptprd/Ptp4a2/Ptpru/Htt/Ptprz1/Dusp11/Dusp16/Ptpro/Ppp6r1/Tgfb1/Ptpn5/Smpd1/Swap70/Ptpre/Dusp26/Mfhas1/Dlc1/Ptpn9/Nck1/Ppm1m/Dusp7/Gnai2/Epm2a/Eya4/Ptprk/Hsp90b1/Dusp6/Ptprr/Ptprb/Ppp1r1b/Dusp3/Rock2/Ppp4r4/Dusp22/Ptpdc1/Cdc14b/Itga1/Ptprg/Ppp2r2a/Ppp3cc…	75
GO:0006665	BP	GO:0006665	sphingolipid metabolic process	47/3832	122/23174	4.7361e-09	2.91081e-05	7.67283e-08	Neu4/Degs1/St8sia6/Hacd1/Gba/Cers2/Ugt8a/Elovl6/Sgms2/Ccn1/Elovl1/Kit/P2rx7/St8sia1/Acer3/Smpd1/Cln8/Asah1/Cers1/Fa2h/Hexa/Cln6/Hacd3/Elovl5/Elovl4/Map7/Smpd2/Smpdl3a/Sgpl1/Gal3st1/Gm2a/Ormdl3/Sptssa/Sgpp1/Sptlc2/Galc/Itgb8/Aldh5a1/Sptlc1/Serinc5/Elovl7/Samd8/Naga/A4galt/Cerk/Asah2/Sgms1	47
GO:1902652	BP	GO:1902652	secondary alcohol metabolic process	49/3832	130/23174	5.27122e-09	3.23969e-05	8.50023e-08	Acadl/Cyp27a1/Hdlbp/Soat1/Lbr/Abca2/Cat/Gba/Ttc39b/Lepr/Dhcr24/Ldlrap1/Cyp51/Insig1/Mvk/Scarb1/Dgat2/Smpd1/Apobr/Dhcr7/Cln8/Fgfr1/Erlin2/Mvd/Ldlr/Aplp2/Cln6/Lipc/Lss/Lrp1/Sec14l2/Il4/Pmp22/Nfe2l1/Erg28/Hmgcs1/Prkaa1/Sqle/Srebf2/Cyb5r3/Lima1/App/Lmf1/Abcg1/Npc1/Fech/Lrp5/Ebp/Nsdhl	49
GO:0022408	BP	GO:0022408	negative regulation of cell-cell adhesion	63/3832	186/23174	5.52192e-09	3.39377e-05	8.86347e-08	Serpine2/Tnr/Mia3/Hlx/Nrarp/Cd44/Prnp/Ccm2l/Cebpb/Lef1/Klf4/Trpv4/Sh2b3/Mad1l1/Podxl/Gpnmb/Loxl3/Cxcl12/Wnk1/Cd9/Tgfb1/Lrrc32/Swap70/Il4ra/Spn/Ccl25/Jak3/Cyld/Cbfb/Rdx/Cd276/Map2k5/Map2k1/Il20rb/Vsir/Peli1/Il4/Irf1/Mapk7/Lgals9/Dusp3/Hfe/Dusp22/Pik3r1/Bmp4/Rgcc/Ptk2/Snai2/Ppm1f/Bcl6/Dlg1/H2-Ab1/Tnfrsf21/Vegfa/Socs5/Epcam/Ndfip1/Ptpn2/Mbp/Gstp1/Anxa1/Jak2/Prkg1	63
GO:0048568	BP	GO:0048568	embryonic organ development	131/3832	490/23174	5.65138e-09	3.47334e-05	9.02966e-08	Sox17/Eya1/Col4a3/En1/Prrx1/Hlx/Flvcr1/Gata3/Itga8/Notch1/Eng/Itga4/Frzb/Nckap1/Itgav/Lmo2/Cebpb/Bmp7/Gnas/Sox18/Hey1/Efna1/Slc39a1/Col11a1/Vcam1/Lef1/Ccn1/Chd7/Mmp16/Nr4a3/Tal1/Id3/Hspg2/Epha2/Insig1/Cc2d2a/Pdgfra/Kit/Kdr/Rest/Pkd2/Tbx3/Sh2b3/Tmed2/Pdgfa/Rac1/Hipk2/Gata2/Lrig1/Erf/Tgfb1/Hpn/Nr2f2/Adm/Igf2/Cdkn1c/Fgfr1/Gab1/Fendrr/Foxf1/Zfpm1/Stra6/Smad3/Map2k1/Myo6/Foxl2/Nphp3/Tmie/Tgfbr2/Plcd1/…	131
GO:0007626	BP	GO:0007626	locomotory behavior	79/3832	254/23174	6.06287e-09	3.72624e-05	9.64289e-08	Npas2/En1/Tnr/Gpr52/Atp1a2/Kcnj10/Grin1/Dnm1/Slc4a10/Dpp4/Fign/Scn1a/Abhd12/Chrna4/Oprl1/Glrb/Chd7/Tmod1/Lepr/Dab1/Tal1/Zmpste24/Ppt1/Adam22/Htt/Adgrl3/Sez6l/Kcnd2/Hipk2/Snca/Chl1/Cxcl12/Eps8/Nav2/Grm5/Fzd4/Cln8/Clcn3/Cacna1a/Olfm2/Aplp2/Usp2/Arcn1/Hexa/Cln6/Myo5a/Myo6/Pcdh15/Adra1b/Slc22a5/Pmp22/Nlgn2/Ankfn1/Ppp1r1b/Cnp/Gaa/Id2/Npas3/Sncg/Slitrk6/Fgf14/Selenop/Adcy8/Lrrk2/Scn8a/Zfp385a/Grin2a/Et…	79
GO:0043406	BP	GO:0043406	positive regulation of MAP kinase activity	71/3832	220/23174	6.35549e-09	3.90608e-05	1.00623e-07	Adora1/Inava/Stk39/Dusp19/Traf6/Rasgrp1/Src/Cd40/Edn3/Tnik/Kit/Pxn/Taok3/P2rx7/Fzd10/Pdgfa/Flt1/Arhgef5/Gadd45a/Tgfa/Ret/Tgfb1/Chrna7/Akap13/Ntrk3/Nox4/Grm5/Fzd4/Cd81/Adam9/Fgfr1/Gab1/Mlkl/Pdgfd/Tirap/Cspg4/Map2k5/Map2k1/Trf/Sash1/Map3k5/Tpd52l1/Shc2/Egfr/Pik3r6/Spag9/Pik3cg/Ripk1/Edn1/Ror2/F2r/Map3k1/Itga1/Bmp4/Htr2a/Ghr/Dab2/Pdgfb/Wnt7b/Lrrk2/Crkl/Map3k4/Vegfa/Alk/Eif2ak2/Map3k11/Map4k2/Jak2/Pl…	71
GO:0010595	BP	GO:0010595	positive regulation of endothelial cell migration	40/3832	97/23174	6.68866e-09	4.11085e-05	1.05419e-07	Ptgs2/Gata3/Cd40/Tek/Nos3/Fgfbp1/Kdr/Anxa3/Gata2/Prkd2/Tgfb1/Gpi1/Emc10/Pik3c2a/Igf2/Fgfr1/Adgra2/Hmox1/Calr/Agt/Nrp1/Ets1/Sash1/Atp5b/Flt4/Sparc/Adora2b/Rock2/Adam17/Hif1a/Rhoj/Bmp4/Sema5a/Pdgfb/Snai2/Vegfa/Jcad/Ccbe1/Atp5a1/Anxa1	40
GO:0097164	BP	GO:0097164	ammonium ion metabolic process	58/3832	167/23174	7.76944e-09	4.7751e-05	1.21902e-07	Acadl/Pnkd/Acsl3/Capn2/Hnmt/Smox/Bche/Gba/Npr1/Sgms2/Acadm/Fabp3/Akr7a5/Crot/Scarb1/Ache/Snca/Spr/Chrna7/Rab38/Acer3/Smpd1/Pnpla6/Asah1/Enpp6/Lpcat2/Ldlr/Lipc/Moxd1/Smpd2/Smpdl3a/Chpt1/Pla2g3/Ddc/Slc22a5/Sat2/Sgpp1/Sptlc2/Akr1c14/Agtr1a/Sptlc1/Lpcat1/Samd8/Gch1/Enpp2/Cyp2d22/Grin2a/Pcyt1a/Prkn/Slc5a7/Epas1/Abhd3/Cpt1a/Asah2/Sgms1/Maoa/Hprt/Sat1	58
GO:1901653	BP	GO:1901653	cellular response to peptide	86/3832	286/23174	7.93364e-09	4.87602e-05	1.23624e-07	Lmbrd1/Stat1/Pid1/Inhbb/Nucks1/Prkcq/Vim/Grb14/Itga4/Ptpra/Prnp/Plcb1/Src/Adrm1/Car2/Prkci/Vcam1/Nfkb1/Nr4a3/Dennd4c/Leprot/Slc9a1/Cpeb2/Pxn/Cav2/Cav1/Nod1/Cpeb1/Grm5/Inppl1/Pde3b/Prkcb/Ptpre/Igf2/Irs2/Eif4ebp1/Cacna1a/Agt/Sesn3/Icam1/Il18/Pkm/Myo5a/Nck1/Gnai2/Sgk1/Enpp1/Fyn/Appl2/Lrp1/Stat6/Cdk2/Xbp1/Grb10/Irf1/Myo1c/Rps6kb1/Stxbp4/Rpl23/Stat5b/Stat3/Rab10/Rock2/Zfp36l1/Agtr1a/Gkap1/Pik3r1/Tbc1d…	86
GO:0042176	BP	GO:0042176	regulation of protein catabolic process	106/3832	376/23174	7.9502e-09	4.88619e-05	1.23624e-07	Sox17/Bag2/Hecw2/Serpine2/Map1a/Usp8/Ddrgk1/Usp13/Tiparp/Sh3d19/Gba/Efna1/Sdcbp/Wwp1/Ufl1/Vcp/Alad/Plk3/Tnfrsf1b/Plekhg5/Cyp51/Chfr/Gna12/Samd9l/Hipk2/Snca/Dysf/Rab7/Tmf1/Timp4/Sirt2/Svip/Furin/Ctsc/Cd81/Adam9/Ndufa13/Gipc1/Prkaca/Nkd1/Disc1/Ldlr/Rdx/Smad3/Snx1/Anxa2/Gpx1/Epm2a/Fyn/Snx3/Gja1/Pttg1ip/Timp3/Agap2/Os9/Lrp1/Rhbdd3/Xbp1/Egfr/Rhbdf1/Tnfsf12/Nos2/Rnft1/Nfe2l1/Rpl23/Psmd3/Nsf/Sox9/Chmp6/…	106
GO:0001885	BP	GO:0001885	endothelial cell development	31/3832	66/23174	8.08762e-09	4.97065e-05	1.25202e-07	F11r/Eng/Id1/Ppp1r16b/Sox18/Arhgef26/Rapgef2/Rap1a/Abcb1b/Tnfrsf1a/Tjp1/Cdh5/Agt/S1pr2/Icam1/Rdx/Gpx1/Col18a1/Vezf1/Pecam1/Fasn/Rock2/F2rl1/Marveld2/Wnt7b/Rapgef3/Cldn5/Notch4/Tjp2/Dmd/Msn	31
GO:0033002	BP	GO:0033002	muscle cell proliferation	74/3832	234/23174	8.22152e-09	5.05295e-05	1.26712e-07	Stat1/Cflar/Ptgs2/Rgs5/Notch1/Calcrl/Traf6/Tgm2/Mmp9/Npr1/Nr4a3/Klf4/Akirin1/Selenon/Ldlrap1/Hes5/Nos3/Tgfbr3/Cav1/Fgfr1/Hmox1/Ednra/Smad1/Mmp2/Cx3cl1/Cdh13/Agt/Pdgfd/Il18/Gnai2/Tgfbr2/Map3k5/Hey2/Gja1/Igfbp3/Egfr/Rps6kb1/Nog/Stat5b/Stat3/Id2/Nampt/Mnat1/Hif1a/Vipr2/Foxc1/Nqo2/Ripk1/Edn1/Pik3r1/Bmp4/Abcc4/Npr3/Zfpm2/Trib1/Myc/Ptk2/Pdgfb/Irak4/Prkdc/Apod/Adamts1/Ppard/Cdkn1a/Notch3/Vegfa/Rab5a/Hbe…	74
GO:0070997	BP	GO:0070997	neuron death	112/3832	404/23174	8.43453e-09	5.18386e-05	1.29422e-07	Casp8/Bcl2/En1/Rab29/Adora1/Ncstn/Capn2/Cd34/Optn/Gata3/Nsmf/Grin1/Scn2a/Kcnip3/Prnp/Pigt/Kcnb1/Cebpb/Prkci/Slc7a11/Nes/Gba/Csf1/Usp53/Casp6/Sigmar1/Nr4a3/Ppt1/Hdac1/Slc9a1/Cdc42/Tnfrsf1b/Nmnat1/Agrn/Fgfr3/Htt/Wfs1/Kdr/Rest/Rilpl1/Fzd9/Ache/Ptprz1/Hipk2/Zfp746/Gpnmb/Snca/Grid2/Chl1/Itpr1/Tnfrsf1a/Mag/Gpi1/Ptpn5/Chrna7/Rras2/Hmox1/Cacna1a/Cx3cl1/Aars/Agt/Nrp1/Epor/Cbl/Hyou1/Il18/Neo1/Foxb1/Rhoa/Gp…	112
GO:0015672	BP	GO:0015672	monovalent inorganic cation transport	124/3832	460/23174	8.49729e-09	5.22243e-05	1.29813e-07	Kcnq5/Slc9a2/Hecw2/Asic4/Serpine2/Dpp10/Atp2b4/Adora1/Kcnt2/Atp1a2/Kcnj10/Rgs7/Stom/Slc4a10/Scn2a/Scn1a/Scn7a/Stk39/Lrrc55/Kcnip3/Prnp/Slc23a2/Plcb1/Slc24a3/Kcnb1/Gnas/Edn3/Atp1a1/Kcnd3/Kcna2/Kcnc4/Nkain3/Slc9a1/Agrn/Nos3/Dpp6/Slc4a4/Pkd2/Tmem175/Atp6v0a2/Slc12a9/Cav1/Kcnd2/Atp6v0e2/Wnk1/Atp6v1e1/Kcna5/Kcna1/Kcna6/Kcnj8/Abcc9/Slc8a2/Dmpk/Tgfb1/Fxyd5/Hpn/Kcnc3/Trpm4/Chp2/Kcnq1/Ank1/Slc25a4/Clcn3/S…	124
GO:0006091	BP	GO:0006091	generation of precursor metabolites and energy	105/3832	372/23174	8.6998e-09	5.3469e-05	1.32327e-07	Ndufs1/Per2/Pfkfb2/Ndufs2/Fh1/Ndufa8/Mtch2/Cat/Gnas/Gyg/Etfdh/Agl/Acadm/Aco1/Vcp/Nr4a3/Ppp3r2/Lepr/Hmgcl/Sdhb/Crot/Pgm2/Noa1/Iscu/P2rx7/Nipsnap2/Mdh2/Vgf/Foxk1/Bpgm/Cycs/Snca/Suclg1/Gfpt1/Suclg2/Slc25a18/Tpi1/Gpi1/Gys1/Ldha/Aldoa/Igf2/Irs2/Prkaca/Phkb/Coq9/Slc37a4/Sdhd/Idh3a/Mpi/Adpgk/Pkm/Rhoa/Uqcrc1/Epm2a/Enpp1/S100b/Pfkl/Shmt2/Atp5b/Coq10a/Uqcr10/Ogdh/Grb10/Ugp2/Mdh1/Adra1b/Stat3/Acox1/Gaa/Dld/…	105
GO:0048259	BP	GO:0048259	regulation of receptor-mediated endocytosis	43/3832	109/23174	9.16987e-09	5.6358e-05	1.3887e-07	Smap1/B2m/Syt11/Sdcbp/Ppt1/Rspo1/Ldlrap1/Lrpap1/Ankrd13a/Hip1r/Hip1/Serpine1/Aak1/Iqsec1/Bicd1/Sirt2/Ptpn5/Sh3gl3/Necab2/Dnm2/Cbl/Anxa2/Snap91/Trf/Syne1/Cd63/Kif3a/Il4/Vtn/Hap1/Nsf/Hfe/Dab2/Arc/Tnk2/Synj1/Cd2ap/Vegfa/Tbc1d5/Lrrtm2/Ankrd13d/Apln/Fmr1	43
GO:0046434	BP	GO:0046434	organophosphate catabolic process	67/3832	205/23174	9.51737e-09	5.84938e-05	1.43509e-07	Inpp1/Pfkfb2/Pla2g4a/Gpd2/Mtch2/Gpcpd1/Plcb1/Abhd12/Samhd1/Pld1/Nudt17/Vcp/Inpp5b/Nudt9/P2rx7/Scarb1/Foxk1/Bpgm/Tpi1/Dera/Gpi1/Aspdh/Ldha/Smpd1/Aldoa/Inpp4b/Nudt7/Mlycd/Ldlr/Mpi/Adpgk/Pkm/Lipc/Nt5e/Gpd1l/Enpp1/Enpp3/Smpd2/Smpdl3a/Pfkl/Ogdh/Upp1/Nt5m/Cnp/Stat3/Nt5c/Hif1a/Entpd5/Prxl2c/Pde4d/Abhd6/Htr2a/Prkaa1/Enpp2/Myc/Pfkm/Synj1/Synj2/Ier3/Nudt12/Eno1b/Impa2/Plcb3/Entpd1/Pgam1/Hprt/Pgk1	67
GO:0030323	BP	GO:0030323	respiratory tube development	71/3832	222/23174	9.71091e-09	5.96832e-05	1.45796e-07	Eya1/Hsd11b1/Notch1/Adamtsl2/Id1/Srsf6/Lama5/Fndc3b/Spry1/Slc7a11/Man1a2/Gpsm2/Wwp1/Selenon/Cdc42/Errfi1/Nos3/Fgfr3/Pdgfra/Kdr/Pdgfa/Loxl3/Mgp/Tshz3/Rcn3/Insc/Dhcr7/Fgfr1/Asah1/Klf2/Hhip/Atxn1l/Foxf1/Pgr/Stra6/Map2k1/Ctsh/Nphp3/Dag1/Tgfbr2/Ccn2/Hmga2/Tns3/Flt4/Sparc/Traf4/Tbx4/Nog/Ace/Sox9/Jmjd6/Bmp4/Spry2/Grhl2/Zfpm2/Wnt7b/Hes1/Vegfa/Ptk7/Man2a1/Lama1/Pkdcc/Epas1/Lox/Ccbe1/Ppp1ca/Pcsk5/Lipa/Rbp4…	71
GO:0046942	BP	GO:0046942	carboxylic acid transport	89/3832	301/23174	1.07503e-08	6.60714e-05	1.60708e-07	Acsl3/Slc16a14/Per2/Sept2/Adora1/Pla2g4a/Kcnj10/Slc27a4/Stk39/Lrp2/Slc43a1/Slc23a2/Slc7a11/Slc16a1/Slc16a4/Abcd3/Pla2g12a/Slc6a9/Mfsd2a/Fabp3/Abcb4/Crot/Htt/P2rx7/Slc7a1/Repin1/Snca/Slc6a1/Slc25a18/Slco1c1/Slco1a4/Slc7a10/Slco2b1/P2ry2/Arl6ip1/Irs2/Cln8/Slc25a15/Acsl1/Gipc1/Cacna1a/Slc7a5/Agt/Stra6/Myo6/Slco2a1/Slc38a3/Epm2a/Slc16a9/Slc1a6/Slc6a15/Slc1a4/Slc36a1/Slc16a13/Slc13a5/Slc43a2/Nos2/Nf1/…	89
GO:0097756	BP	GO:0097756	negative regulation of blood vessel diameter	42/3832	106/23174	1.16655e-08	7.1696e-05	1.73644e-07	Per2/Adora1/Ptgs2/Atp1a2/Edn3/Rap1gds1/Drd5/Cd38/Cav1/Mgll/Hrh1/Kcna5/Trpm4/Adm/Ednra/Mmp2/Cx3cl1/Agt/Icam1/Map2k1/Manf/Rhoa/Gja1/Tbxa2r/Egfr/Adra1b/Asic2/Ace/Dock4/Hif1a/Chga/Agtr1a/Edn1/F2r/Dock5/Htr2a/Ednrb/Pdgfb/Acta2/Add3/Dusp5/Apln	42
GO:0008203	BP	GO:0008203	cholesterol metabolic process	47/3832	125/23174	1.17513e-08	7.22232e-05	1.74176e-07	Acadl/Cyp27a1/Hdlbp/Soat1/Lbr/Abca2/Cat/Gba/Ttc39b/Lepr/Dhcr24/Ldlrap1/Cyp51/Insig1/Mvk/Scarb1/Dgat2/Smpd1/Apobr/Dhcr7/Cln8/Erlin2/Mvd/Ldlr/Aplp2/Cln6/Lipc/Lss/Lrp1/Sec14l2/Il4/Pmp22/Nfe2l1/Hmgcs1/Prkaa1/Sqle/Srebf2/Cyb5r3/Lima1/App/Lmf1/Abcg1/Npc1/Fech/Lrp5/Ebp/Nsdhl	47
GO:0016055	BP	GO:0016055	Wnt signaling pathway	116/3832	425/23174	1.2017e-08	7.38568e-05	1.77361e-07	Sox17/Wnt6/Gata3/Nrarp/Notch1/Frzb/Cd44/Usp8/Src/Sulf2/Tbl1xr1/Tnik/Wwtr1/Siah2/Sfrp2/Lef1/Dkk2/Nfkb1/Vcp/Klf4/Ror1/Trabd2b/Rspo1/Hdac1/Ptpru/Fgfr3/Pkd2/Fzd10/Fzd9/Rac1/Cav1/Tcf7l1/Mitf/Wnt5b/Wnk1/Ptpro/Caprin2/Dact3/Ccne1/Trpm4/Lrrk1/Mesd/Fzd4/Tgfb1i1/Ccnd1/Adgra2/Brd7/Nkd1/Cyld/Cdh3/Disc1/Smad3/Amotl2/Nphp3/Limd1/Epm2a/Snx3/Bicc1/Lgr5/Hmga2/Lrp1/Kremen1/Znrf3/Grb10/Egfr/Tcf7/Shisa6/Tmem88/Hic1/…	116
GO:0007156	BP	GO:0007156	homophilic cell adhesion via plasma membrane adhesion molecules	43/3832	110/23174	1.26595e-08	7.78054e-05	1.86055e-07	Cdh20/Hmcn1/Ccdc141/Ptprt/Cdh22/Fat4/Pcdh10/Igsf21/Clstn1/Anxa3/Sdk1/Cntn6/Ret/Clstn3/Nectin2/Pvr/Cdh11/Cdh5/Cdh3/Cdh13/Fat3/Igsf9b/Esam/Prtg/Pik3cb/Pcdh15/Bsg/Fat2/Pecam1/Emb/Cdhr1/Pcdh20/Cdh6/Cdh10/Cdh18/Dscam/Dsc2/Pcdhb14/Pcdhgc3/Pcdh1/Pcdh12/Plxnb3/Pcdh19	43
GO:0015849	BP	GO:0015849	organic acid transport	89/3832	302/23174	1.27979e-08	7.86561e-05	1.87299e-07	Acsl3/Slc16a14/Per2/Sept2/Adora1/Pla2g4a/Kcnj10/Slc27a4/Stk39/Lrp2/Slc43a1/Slc23a2/Slc7a11/Slc16a1/Slc16a4/Abcd3/Pla2g12a/Slc6a9/Mfsd2a/Fabp3/Abcb4/Crot/Htt/P2rx7/Slc7a1/Repin1/Snca/Slc6a1/Slc25a18/Slco1c1/Slco1a4/Slc7a10/Slco2b1/P2ry2/Arl6ip1/Irs2/Cln8/Slc25a15/Acsl1/Gipc1/Cacna1a/Slc7a5/Agt/Stra6/Myo6/Slco2a1/Slc38a3/Epm2a/Slc16a9/Slc1a6/Slc6a15/Slc1a4/Slc36a1/Slc16a13/Slc13a5/Slc43a2/Nos2/Nf1/…	89
GO:0060993	BP	GO:0060993	kidney morphogenesis	40/3832	99/23174	1.34149e-08	8.24482e-05	1.95508e-07	Eya1/Wnt6/Bcl2/Gata3/Cd44/Bmp7/Lama5/Hey1/Fat4/Wwtr1/Zmpste24/Hes5/Tgfb1/Tshz3/Irx3/Agt/Nphp3/Nog/Wnk4/Sox9/Six4/Agtr1a/Klhl3/Adamts16/Irx1/Irx2/Foxd1/Bmp4/Myc/Wnt7b/Lrrk2/Hes1/Dlg1/Sox8/Vegfa/Greb1l/Gcnt1/Gpc3/Maged1/Cited1	40
GO:0032964	BP	GO:0032964	collagen biosynthetic process	27/3832	54/23174	1.36867e-08	8.41184e-05	1.98637e-07	Tram2/Vim/Col5a1/Eng/Creb3l1/Rap1a/Cyp2j6/Errfi1/Emilin1/Serpine1/P3h3/Tgfb1/Rcn3/Serpinh1/Il18/Ccn2/Adora2b/P3h4/F2r/Bmp4/Rgcc/Pdgfb/Rapgef3/Ppard/Ltbp1/Mkx/Prdx5	27
GO:0043393	BP	GO:0043393	regulation of protein binding	75/3832	241/23174	1.41366e-08	8.68838e-05	2.04316e-07	Bag2/Mitd1/Bcl2/Ralb/Itga4/B2m/Fkbp1a/Id1/Ccm2l/Src/Mmp9/Nmd3/Rapgef2/Adam15/Lef1/Ufl1/Epb41/Ldlrap1/Cdc42/Agrn/Eif2b4/Lrpap1/Tgfbr3/Hip1r/Lfng/Ica1/Cav1/Cald1/Hipk2/Ephb6/Eif2ak3/Dysf/Camk1/Plxnd1/Caprin2/Spon1/Cyld/Amfr/Ripor1/Zfpm1/Disc1/Aplp2/Tirap/Anxa2/Plscr1/Pcbd1/Lrp1/Traf4/Vtn/Nog/Spag9/Ace/Tmc8/Arf6/Eif2s1/Mark3/Hfe/Bmp4/Dzip1/Dab2/Myc/Pdgfb/Lrrk2/Tmbim6/Hes1/Ppp1r2/Dtx3l/App/Prkn/Bak1/…	75
GO:0048713	BP	GO:0048713	regulation of oligodendrocyte differentiation	26/3832	51/23174	1.50358e-08	9.24102e-05	2.16414e-07	Notch1/Mir219a-2/Ptpra/Nkx2-2/Nkx2-2os/Dusp15/Hdac1/Tnfrsf1b/Hes5/Wdr1/Ptn/Sirt2/Il34/Lingo1/Dag1/Zfp365/Nf1/Id2/Zfp488/Bmp4/Enpp2/Hes1/Olig2/Qk/Tnfrsf21/Tcf7l2	26
GO:0198738	BP	GO:0198738	cell-cell signaling by wnt	116/3832	427/23174	1.59778e-08	9.81993e-05	2.29025e-07	Sox17/Wnt6/Gata3/Nrarp/Notch1/Frzb/Cd44/Usp8/Src/Sulf2/Tbl1xr1/Tnik/Wwtr1/Siah2/Sfrp2/Lef1/Dkk2/Nfkb1/Vcp/Klf4/Ror1/Trabd2b/Rspo1/Hdac1/Ptpru/Fgfr3/Pkd2/Fzd10/Fzd9/Rac1/Cav1/Tcf7l1/Mitf/Wnt5b/Wnk1/Ptpro/Caprin2/Dact3/Ccne1/Trpm4/Lrrk1/Mesd/Fzd4/Tgfb1i1/Ccnd1/Adgra2/Brd7/Nkd1/Cyld/Cdh3/Disc1/Smad3/Amotl2/Nphp3/Limd1/Epm2a/Snx3/Bicc1/Lgr5/Hmga2/Lrp1/Kremen1/Znrf3/Grb10/Egfr/Tcf7/Shisa6/Tmem88/Hic1/…	116
GO:0031098	BP	GO:0031098	stress-activated protein kinase signaling cascade	86/3832	290/23174	1.62481e-08	9.98606e-05	2.31945e-07	Phlpp1/Inava/Stk39/Dusp19/Traf6/Hipk3/Rasgrp1/Rassf2/Plcb1/Dusp15/Tnik/Mecom/Sfrp2/Cdc42se1/Lyn/Prdx1/Zmpste24/Cdc42/Errfi1/Fgfr3/Rell1/Trpv4/Taok3/Fzd10/Hipk2/Arhgef5/Nod1/Gadd45a/Ltbr/Pak4/Nphs1/Emc10/Fzd4/Mfhas1/Gab1/Cyld/Mlkl/Agt/Mmp8/Tirap/Cryab/Map2k5/Map2k1/Hacd3/Trf/Rhoa/Sash1/Map3k5/Ccn2/Tpd52l1/Egfr/Stk10/Flt4/Traf4/Spag9/Dusp3/Map4k5/Zfp36l1/Ccdc88c/Dusp22/Ripk1/Edn1/Ror2/F2rl1/Map3k1/…	86
GO:0048762	BP	GO:0048762	mesenchymal cell differentiation	69/3832	216/23174	1.64334e-08	0.000101	2.33634e-07	Fn1/Bcl2/Notch1/Eng/Frzb/Sema6d/Bmp7/Edn3/Lama5/Hey1/Wwtr1/Sfrp2/Efna1/Adam15/Lef1/Sdcbp/Heyl/Trim62/Sema3d/Tgfbr3/Loxl3/Kbtbd8/Ret/Strap/Dact3/Plaur/Tgfb1/Hpn/Tgfb1i1/Fgfr1/Ednra/Nrp1/Phldb1/Smad3/Dag1/Tgfbr2/Hey2/Gja1/Pofut2/Anxa6/Rflnb/Nog/Tmem100/Axin2/Sox9/Hif1a/Foxc1/Edn1/Sema4d/Sema3g/Bmp4/Rgcc/Ednrb/Dab2/Sema5a/Has2/Sox10/Snai2/Tbx1/Hes1/Sema5b/Phldb2/Erg/Sox8/Vegfa/Sema6a/Ldlrad4/Nfatc1/…	69
GO:0002063	BP	GO:0002063	chondrocyte development	24/3832	45/23174	1.69898e-08	0.000104419	2.39716e-07	Mia3/Matn4/Sulf2/Col20a1/Sfrp2/Ecm1/Col11a1/Impad1/Matn1/Vwa1/Eif2ak3/Acan/Serpinh1/Col12a1/Tgfbr2/Col6a2/Col6a1/Chst11/Rflnb/Axin2/Sox9/Rarg/Vit/Vwa2	24
GO:0090049	BP	GO:0090049	regulation of cell migration involved in sprouting angiogenesis	22/3832	39/23174	1.69989e-08	0.000104475	2.39716e-07	Ptgs2/Notch1/Spred1/Dll4/Klf4/Fgfbp1/Kdr/Stard13/Gata2/Pik3c2a/Hmox1/Nrp1/Map2k5/Rhoa/Tbxa2r/Meox2/Rhoj/Mmrn2/Card10/Vegfa/Jcad/Anxa1	22
GO:0008654	BP	GO:0008654	phospholipid biosynthetic process	55/3832	158/23174	1.71033e-08	0.000105117	2.40216e-07	Pgap1/Acsl3/Pigc/Capn2/Agpat2/Lpcat4/Fitm2/Pigt/Pld1/Sgms2/Fabp3/Mvk/Pdgfa/Pyurf/Hdhd5/Lpcat3/Etnk1/Mboat7/Rab38/Inppl1/Far1/Pik3c2a/Cdipt/Lpcat2/Mvd/Pigyl/Plscr1/Pik3cb/Abhd5/Chpt1/Dgka/Pigl/Pigs/Pcyt2/Pik3cg/Sptlc2/Idi1/Sptlc1/Ptdss1/Lpcat1/Serinc5/Hmgcs1/Samd8/Htr2a/Gpaa1/Pdgfb/Pcyt1a/Ppard/Agpat1/Adgrf5/Lclat1/Pcx/Sgms1/Gpam/Acsl5	55
GO:0060541	BP	GO:0060541	respiratory system development	77/3832	251/23174	1.82572e-08	0.000112209	2.55392e-07	Eya1/Hsd11b1/Notch1/Adamtsl2/Id1/Srsf6/Lama5/Myt1/Fndc3b/Spry1/Slc7a11/Man1a2/Gpsm2/Lef1/Chd7/Wwp1/Selenon/Cdc42/Errfi1/Nos3/Fgfr3/Pdgfra/Kdr/Fgfrl1/Pdgfa/Loxl3/Mgp/Gng8/Tshz3/Rcn3/Insc/Dhcr7/Fgfr1/Asah1/Klf2/Hhip/Atxn1l/Fendrr/Foxf1/Pgr/Stra6/Map2k1/Ctsh/Nphp3/Dag1/Tgfbr2/Ccn2/Hmga2/Tns3/Flt4/Sparc/Tbx4/Nog/Ace/Sox9/Jmjd6/Six4/Bmp4/Spry2/Grhl2/Zfpm2/Wnt7b/Rarg/Hes1/Vegfa/Ptk7/Man2a1/Lama1/Pkdcc/…	77
GO:0007229	BP	GO:0007229	integrin-mediated signaling pathway	37/3832	89/23174	1.8781e-08	0.000115428	2.61669e-07	Itga8/Itga6/Itga4/Itgav/Src/Lama5/Adam15/Vav3/Tln1/Fgr/Tec/Pxn/Ptn/Zyx/Loxl3/Arhgap35/Itgal/Nrp1/Itgb1/Rhoa/Itga9/Ccn2/Lims1/Madcam1/Cd63/Itga7/Fut8/Itgb8/Itga1/Fermt2/Dab2/Ptk2/Itga5/Itgb2l/Lims2/Pcsk5/Plp1	37
GO:0060828	BP	GO:0060828	regulation of canonical Wnt signaling pathway	70/3832	221/23174	1.91305e-08	0.000117576	2.64423e-07	Sox17/Nrarp/Notch1/Frzb/Usp8/Src/Sulf2/Tbl1xr1/Wwtr1/Siah2/Sfrp2/Dkk2/Nfkb1/Vcp/Rspo1/Hdac1/Ptpru/Fgfr3/Fzd9/Cav1/Wnt5b/Wnk1/Ptpro/Caprin2/Dact3/Trpm4/Lrrk1/Adgra2/Nkd1/Cyld/Cdh3/Smad3/Nphp3/Limd1/Bicc1/Lgr5/Kremen1/Znrf3/Egfr/Shisa6/Tmem88/Mks1/Nog/Axin2/Sox9/Slc9a3r1/Notum/Sostdc1/Ror2/Nkd2/Zbed3/Lats2/Sox7/Scel/Gpc5/Dab2/Sema5a/Fzd6/Sox10/Lrrk2/Prickle1/Snai2/Prkn/Ptk7/Ccny/Tle4/Kank1/Tcf7l2/X…	70
GO:2000116	BP	GO:2000116	regulation of cysteine-type endopeptidase activity	70/3832	221/23174	1.91305e-08	0.000117576	2.64423e-07	Stat1/Cflar/Casp8/Col4a3/Ptgs2/Grin1/Gsn/Mtch2/Rag1/Cd44/Src/Mmp9/Tnfsf10/Siah2/Sfrp2/S100a8/S100a9/F3/Lef1/Ccn1/Bcl10/Asph/Vcp/Klf4/Dhcr24/Rps6ka1/Htt/Rest/Hip1r/Hip1/Cycs/Nod1/Snca/Eif2ak3/Ret/Plaur/Gpi1/Pdcd5/Arl6ip1/Gas6/Dlc1/Ndufa13/Birc3/Cryab/Uaca/Map2k5/Smad3/Foxl2/Rhoa/Gpx1/Ltf/Map3k5/Ccn2/Fyn/Mical1/Cyfip2/Cast/F2r/Sox7/Dap/Myc/Nr4a1/Ppm1f/Bak1/Vegfa/Xdh/Jak2/Xiap/Bcap31/Rps6ka3	70
GO:0032102	BP	GO:0032102	negative regulation of response to external stimulus	96/3832	336/23174	1.93478e-08	0.000118912	2.6637e-07	Serpine2/Adora1/Tnr/Nenf/Cd34/Gata3/Grin1/Notch1/Calcrl/Tfpi/Cd44/Sema6d/Thbd/Ptgis/Cers2/Nfkb1/Grin3a/Tnfrsf1b/Sema3d/Fndc4/Pdgfra/Mvk/Sh2b3/Serpine1/Pdgfa/Grid2/Tnfrsf1a/Cd9/Mill2/Pglyrp1/Sirt2/Chrna7/Selenos/Xylt1/Spn/Htra1/Angpt2/Mfhas1/Cx3cl1/Cdh5/Wfdc1/Foxf1/Nrp1/Ldlr/Ets1/Nlrx1/Cd276/Neo1/Uaca/Smad3/Rora/Anxa2/Cd109/Nt5e/Il20rb/Gpx1/Ltf/Enpp3/Prdm1/Gja1/Fabp7/Appl2/Kremen1/Il4/C1qbp/Lgals9…	96
GO:0072073	BP	GO:0072073	kidney epithelium development	51/3832	143/23174	2.24691e-08	0.000138095	3.08123e-07	Eya1/Wnt6/Bcl2/Gata3/Notch1/Cd44/Cat/Bmp7/Lama5/Hey1/Spry1/Fat4/Smad9/Wwtr1/Heyl/Hes5/Ret/Ptpro/Tgfb1/Tshz3/Fgfr1/Smad1/Irx3/Agt/Smad3/Nog/Wnk4/Sox9/Six4/Agtr1a/Foxc1/Smad5/Klhl3/Adamts16/Irx1/Irx2/Foxd1/Bmp4/Myc/Pdgfb/Wnt7b/Hes1/Dlg1/Dll1/Sox8/Vegfa/Epcam/Greb1l/Gpc3/Maged1/Cited1	51
GO:0002042	BP	GO:0002042	cell migration involved in sprouting angiogenesis	27/3832	55/23174	2.2651e-08	0.000139213	3.094e-07	Ptgs2/Mia3/Notch1/Spred1/Dll4/Klf4/Fgfbp1/Kdr/Stard13/Gata2/Pik3c2a/Hmox1/Nrp1/Itgb1/Map2k5/Rhoa/Tbxa2r/Meox2/Clec14a/Rhoj/Mmrn2/Egr3/Card10/Nr4a1/Vegfa/Jcad/Anxa1	27
GO:0051604	BP	GO:0051604	protein maturation	88/3832	301/23174	2.32598e-08	0.000142955	3.16048e-07	Bag2/Casp8/Serpine2/Ncstn/Capn2/Susd4/Gsn/Ldlrad3/Cd59a/Pcsk2/Src/Aph1a/F3/Prss12/Asph/Mmp16/Oma1/Dhcr24/Tmem59/Zmpste24/Inpp5b/Ece1/Ddi2/P2rx7/Serpine1/Nfu1/A2m/Fkrp/Hpn/Pcsk6/Furin/Sec11a/Serpinh1/Spcs2/Spon1/Uqcrc2/Glrx3/Atp7b/Plat/Spcs3/Prkaca/Glg1/Birc3/Angptl8/Ciao2a/Anxa2/Adam10/Ctsh/Vsir/Tspan15/Srgn/Rfx4/Metap2/Cpm/Atp23/Aebp1/Cyfip2/C1qbp/Cpd/Pitrm1/Tspan17/Ctla2a/Nkd2/Cast/Ero1l/Cln5/R…	88
GO:0006066	BP	GO:0006066	alcohol metabolic process	90/3832	310/23174	2.33192e-08	0.00014332	3.16048e-07	Inpp1/Acadl/Cyp27a1/Hdlbp/Soat1/Itpkb/Ephx1/Lbr/Abca2/Cat/Plcb1/Gba/Nfkb1/Ttc39b/Lepr/Dhcr24/Inpp5b/Ldlrap1/Akr7a5/Cyp51/Insig1/Srd5a3/Rest/Mvk/Scarb1/Adcyap1r1/Snca/Dysf/Spr/Tpi1/Acer3/Dgat2/Mogat2/Inppl1/Smpd1/Gde1/Apobr/Dhcr7/Cln8/Fgfr1/Erlin2/Asah1/Inpp4b/Mvd/Ldlr/Aplp2/Cln6/Lipc/Pth1r/Plcd1/Moxd1/Pcbd1/Lss/Lrp1/Sec14l2/Il4/Pmp22/Nfe2l1/Sgpp1/Rdh11/Erg28/Sptlc2/Akr1c14/Sptlc1/Pcbd2/Hmgcs1/Gch…	90
GO:0048872	BP	GO:0048872	homeostasis of number of cells	91/3832	315/23174	2.531e-08	0.000155555	3.417e-07	Smap1/Slc40a1/Stat1/Dock10/Bcl2/Ildr2/Ncstn/Fh1/Itpkb/Flvcr1/Gata3/Notch1/Mtch2/Rag1/Cd44/Lmo2/B2m/Rassf2/Plcb1/Mecom/Skil/Slc7a11/Csf1/Bcl10/Lyn/Ptbp3/Pde4b/Tal1/Prdx1/Nos3/Kit/Tgfbr3/Sh2b3/P2rx7/Rac1/Bpgm/Gata2/Tgfb1/Gpi1/Rps17/Lmo1/Ampd3/Sox6/Ank1/Mfhas1/Jak3/Klf2/Hmox1/Cyld/Zfpm1/Jam3/Ets1/Slc37a4/Il18/Bcl2a1a/Pik3cb/Il20rb/P4htm/Map7/Chst3/Kif3a/Nfe2l1/Stat5b/Stat3/Sox9/Jmjd6/Adam17/Id2/Sos2…	91
GO:0042391	BP	GO:0042391	regulation of membrane potential	118/3832	440/23174	2.64087e-08	0.000162308	3.55157e-07	Ndufs1/Pid1/Bcl2/Adora1/Kcnt2/Kcnj10/Rgs7/Grin1/Scn2a/Scn1a/Scn7a/Mtch2/Src/Rims4/Kcnb1/Chrna4/Nlgn1/Glrb/Gba/Atp1a1/Kcnd3/Kcna2/Kcnc4/Usp53/Ppa2/Vcp/Zmpste24/Slc9a1/Agrn/Dpp6/Htt/Wdr1/Gabrg1/Kdr/Cux2/Atp2a2/P2rx7/Tac1/Cav1/Kcnd2/Ptn/Snca/Grid2/Tafa4/Kcna5/Kcna1/Kcnj8/Dmpk/Myh14/Trpm4/Chrna7/Ntrk3/Tmem135/Ucp2/Insyn2a/Kcnq1/Rnf122/Nr3c2/Cacna1a/Cx3cl1/Piezo1/Kcnk1/S1pr2/Igsf9b/Slc25a36/Gpd1l/Syne…	118
GO:0048008	BP	GO:0048008	platelet-derived growth factor receptor signaling pathway	29/3832	62/23174	2.74204e-08	0.000168525	3.67344e-07	Ptprj/Src/Tiparp/F3/Nr4a3/Pdgfra/Hip1r/Hip1/Pdgfa/Snca/Inppl1/Plat/Gab1/Nrp1/Pdgfd/Cbl/Sgpl1/Arid5b/Lrp1/Slc9a3r1/Glrx/Pdgfb/Apod/Vegfa/Fer/Lox/Ptpn2/Jak2/Zfp950	29
GO:0048708	BP	GO:0048708	astrocyte differentiation	35/3832	83/23174	2.92021e-08	0.000179476	3.89714e-07	Serpine2/Gpr37l1/Vim/Notch1/Nkx2-2/S100a8/S100a9/Tspan2/Ror1/Dab1/Tal1/Hes5/Fgfr3/Dll3/Mag/Ntrk3/Sox6/Agt/Ldlr/Map2k1/Hmga2/Lrp1/Egfr/Nf1/Nog/Stat3/Sox9/Id2/Ror2/Il6st/Hes1/App/Dll1/Sox8/Plp1	35
GO:0030324	BP	GO:0030324	lung development	69/3832	219/23174	3.05024e-08	0.000187468	4.05514e-07	Eya1/Hsd11b1/Notch1/Adamtsl2/Id1/Srsf6/Lama5/Fndc3b/Spry1/Slc7a11/Man1a2/Gpsm2/Wwp1/Selenon/Cdc42/Errfi1/Nos3/Fgfr3/Pdgfra/Kdr/Pdgfa/Loxl3/Mgp/Tshz3/Rcn3/Insc/Dhcr7/Fgfr1/Asah1/Klf2/Hhip/Atxn1l/Foxf1/Pgr/Stra6/Map2k1/Ctsh/Nphp3/Dag1/Tgfbr2/Ccn2/Hmga2/Tns3/Flt4/Sparc/Tbx4/Nog/Ace/Sox9/Jmjd6/Bmp4/Spry2/Grhl2/Zfpm2/Wnt7b/Hes1/Vegfa/Ptk7/Man2a1/Lama1/Pkdcc/Epas1/Lox/Ccbe1/Ppp1ca/Lipa/Rbp4/Gpc3/Zic3	69
GO:0099174	BP	GO:0099174	regulation of presynapse organization	21/3832	37/23174	3.10937e-08	0.000191102	4.11803e-07	Nlgn1/Slitrk3/Snca/Grid2/Clstn3/Lrrc4b/Ntrk3/Snap91/Nlgn2/Lrfn5/Mdga2/Arf6/Slitrk1/Eif4g1/Il1rap/App/Nrxn1/Cbln2/Slitrk2/Il1rapl1/Nlgn3	21
GO:1904019	BP	GO:1904019	epithelial cell apoptotic process	43/3832	113/23174	3.22002e-08	0.000197902	4.24842e-07	Cflar/Casp8/Col4a3/Gata3/Gsn/Itga4/Mtch2/Srsf6/Cd40/Prkci/Tek/Hdac1/Tnip2/Wfs1/Kdr/Serpine1/Gata2/Pak4/Gas6/Hmox1/Pgr/Icam1/Tgfbr2/Col18a1/Xbp1/Il4/Mapk7/Ramp2/Pik3cg/Arf6/Eif2s1/Zfp36l1/Jag2/Ryr2/Cast/Bmp4/Rgcc/Sema5a/Angptl4/Ecscr/Cd248/Jak2/Pdcd4	43
GO:0045807	BP	GO:0045807	positive regulation of endocytosis	58/3832	173/23174	3.31442e-08	0.000203704	4.35647e-07	Il15ra/Tor1a/Dnm1/Lrp2/Ptprj/B2m/Nlgn1/Rap1a/Ppt1/Ldlrap1/Rap1gap/Hip1r/Hip1/Serpine1/Cav1/Snca/Gata2/Bicd1/Actn4/Ptpn5/Tub/Cd151/Gas6/Calr/Itgb1/Dnm2/Cbl/Anxa2/Snap91/Trf/Syne1/Abca7/Appl2/Lrp1/Cd63/Kif3a/Il4/Vtn/Hfe/Lman2/F2rl1/Ppp3cc/Dab2/Ptk2/Lrrk2/Cd47/Pros1/Synj1/Dll1/Vegfa/Tbc1d5/Sh3gl1/Rab31/Mib1/Apln/Gpc3/Fmr1/Il2rg	58
GO:0060326	BP	GO:0060326	cell chemotaxis	87/3832	299/23174	3.54625e-08	0.000217953	4.64367e-07	Ackr3/Prkcq/Notch1/Eng/Stk39/Ptprj/Prex1/Edn3/S100a8/S100a9/Csf1/Vav3/Vcam1/Lef1/Lyn/Pde4b/Akirin1/Epha2/Plekhg5/Pdgfra/Kit/Kdr/Cmklr1/Trpv4/Sbds/Serpine1/Rac1/Flt1/Ptn/Arhgef5/Dysf/Tafa4/Hrh1/Cxcl12/Wnk1/Il17ra/Ptpro/Prkd2/Trpm4/Rhog/Swap70/Ccl25/Gas6/Fgfr1/Ednra/Gab1/Calr/Cx3cl1/Nrp1/Pdgfd/Jam3/Tirap/Slc37a4/Adam10/Ccrl2/Itga9/Ackr2/Ccr1/Il4/C1qbp/Mmp28/Adam17/Dock4/Chga/Agtr1a/Edn1/F2rl1/Pde4d…	87
GO:0072524	BP	GO:0072524	pyridine-containing compound metabolic process	55/3832	161/23174	3.5917e-08	0.000220746	4.68557e-07	Rpe/Pfkfb2/Nmnat2/Hsd11b1/Gpd2/Mtch2/Nudt17/Vcp/Pgd/Nmnat1/H6pd/Htt/P2rx7/Mdh2/Foxk1/Bpgm/Tpi1/Gpi1/Aspdh/Ldha/Aldoa/Taldo1/Ido2/Pgls/Idh3a/Mpi/Adpgk/Pkm/Me1/Gpd1l/Pfkl/Pdxk/Ogdh/Mdh1/Stat3/Dld/Nampt/Hif1a/Entpd5/Dlst/Prxl2c/Tkt/Htr2a/Prkaa1/Myc/Pfkm/Ier3/Nudt12/Eno1b/Me2/Prdx5/Nmrk1/Pgam1/Pgk1/Pdha1	55
GO:0030203	BP	GO:0030203	glycosaminoglycan metabolic process	34/3832	80/23174	3.62455e-08	0.000222765	4.71078e-07	Chpf/Itih5/Chst1/Ext2/Cd44/Chst14/Nfkb1/Impad1/Ugdh/Pglyrp1/Tgfb1/Xylt1/Spock3/Csgalnact1/Chst5/Hexa/Glce/Cln6/Dse/Spock2/Chst3/Chst11/Cltc/Xylt2/Sgsh/Foxc1/Habp4/Egflam/Ext1/Has2/Pdgfb/Ccnd3/Chst7/Bgn	34
GO:0046486	BP	GO:0046486	glycerolipid metabolic process	92/3832	322/23174	3.78896e-08	0.000232869	4.90615e-07	Inpp1/Pgap1/Acsl3/Pla2g4a/Pigc/Capn2/Bpnt1/Agpat2/Cat/Gpcpd1/Plcb1/Abhd12/Fitm2/Pigt/Tbl1xr1/Pld1/Impad1/Ccnc/Inpp5b/Fabp3/Insig1/Scarb1/Pdgfa/Cav1/Pyurf/Mgll/Hdhd5/Etnk1/Mboat7/Abhd2/Rab38/Dgat2/Mogat2/Inppl1/Far1/Pik3c2a/Apobr/Cdipt/Pnpla2/Pnpla6/Acsl1/Inpp4b/Lpcat2/Ldlr/Pigyl/Slc37a4/Lipc/Plscr1/Pik3cb/Gpx1/Abhd5/Chpt1/Dgka/Pla2g3/Pigl/Pigs/Pik3cg/Sel1l/Ttc7b/Aldh5a1/Ptdss1/Lpcat1/Serinc5/Pik3…	92
GO:0015980	BP	GO:0015980	energy derivation by oxidation of organic compounds	76/3832	251/23174	4.15815e-08	0.00025556	5.36426e-07	Ndufs1/Per2/Ndufs2/Fh1/Ndufa8/Mtch2/Cat/Gnas/Gyg/Etfdh/Agl/Acadm/Aco1/Vcp/Nr4a3/Ppp3r2/Lepr/Sdhb/Pgm2/Noa1/Iscu/Mdh2/Cycs/Snca/Suclg1/Gfpt1/Suclg2/Slc25a18/Gys1/Ldha/Igf2/Irs2/Prkaca/Phkb/Coq9/Slc37a4/Sdhd/Idh3a/Uqcrc1/Epm2a/Enpp1/S100b/Shmt2/Coq10a/Uqcr10/Ogdh/Grb10/Ugp2/Mdh1/Adra1b/Gaa/Dld/Hif1a/Dlst/Aldh5a1/Uqcrb/Sdha/Il6st/Sucla2/Myc/Pfkm/Trap1/Ppp1r2/Ndufv3/Adgrf5/Slc25a23/Ndufv2/Pcdh12/Nduf…	76
GO:0034333	BP	GO:0034333	adherens junction assembly	35/3832	84/23174	4.21308e-08	0.000258936	5.41506e-07	Abi2/Bcl2/Itgav/Ptprj/Src/Tek/Tesk2/Col16a1/Limch1/Kdr/Pxn/Rac1/Dlc1/Nrp1/Peak1/Smad3/Ptprk/Lims1/Lrp1/Ramp2/Dusp3/Actn1/Dusp22/Vcl/Fermt2/Enpp2/Ptk2/Acvrl1/Ppm1f/Apod/Phldb2/Vegfa/Rhod/Slk/Arhgap6	35
GO:1903706	BP	GO:1903706	regulation of hemopoiesis	110/3832	406/23174	4.34038e-08	0.00026676	5.55818e-07	Smap1/Stat1/Casp8/Itpkb/Hlx/Gata3/Il15ra/Nrarp/Notch1/Rag1/Traf6/Cd44/Lmo2/Rasgrp1/B2m/Fbn1/Rassf2/Cebpb/Gnas/Adrm1/Car2/Gpr171/Csf1/Lef1/Lyn/Tox/Mysm1/Tal1/Hes5/Pus7/Fgfr3/Kdr/Flt1/Ptn/Tmem176b/Tmem176a/Loxl3/Gata2/Mitf/Cd4/Clec2d/Pglyrp1/Clptm1/Tgfb1/Il4ra/Gas6/Jak3/Inpp4b/Cyld/Cbfb/Atxn1l/Il34/Zfpm1/Ets1/Il18/Rhoa/P4htm/Tgfbr2/Ccr1/Prdm1/Vsir/Xbp1/Il4/Irf1/Pik3r6/Lgals9/Nf1/Kat2a/Stat5b/Stat3/…	110
GO:0031623	BP	GO:0031623	receptor internalization	46/3832	126/23174	4.78514e-08	0.000294095	6.08299e-07	Lmbrd1/Ackr3/Ramp1/Dnm3/Dnm1/Calcrl/Gria2/Sdcbp/Eps15/Rspo1/Ldlrap1/Lrpap1/Ankrd13a/Ache/Cav1/Snca/Iqsec1/Cd9/Sirt2/Ptpn5/Adm/Cd81/Necab2/Itgb1/Dnm2/Snx1/Myo6/Syne1/Cd63/Cltc/Hap1/Ramp2/Nsf/Cacng4/Dab2/Arc/Tfrc/Synj1/Vegfa/Tbc1d5/Rab5a/Rab31/Lrrtm2/Ankrd13d/Apln/Fmr1	46
GO:0055076	BP	GO:0055076	transition metal ion homeostasis	46/3832	126/23174	4.78514e-08	0.000294095	6.08299e-07	Slc40a1/Slc39a10/Steap3/Slc30a1/Slc39a12/B2m/Slc30a4/Prnp/Cp/Slc30a7/Slc39a8/Aco1/Slc31a2/Slc31a1/Steap4/Htt/Iscu/Atp6v0a2/Glrx3/Atp7b/Ank1/Hmox1/Aplp2/Neo1/Trf/Ltf/Atox1/Tmc8/Hif1a/Hfe/Slc30a5/Ncoa4/Slc22a17/Slc39a14/Myc/Tfrc/App/Slc39a7/Epas1/Ttc7/Ndfip1/Fech/Fth1/Atp6ap1/Heph/Abcb7	46
GO:1904375	BP	GO:1904375	regulation of protein localization to cell periphery	48/3832	134/23174	4.9155e-08	0.000302107	6.22599e-07	Acsl3/Pid1/Dpp10/Ppp2r5a/Sapcd2/Prnp/Tnik/Prkci/Rap1a/Gpsm2/Tmem59/Epb41/Ldlrap1/Epha2/Rer1/Dpp6/Cnpy4/Vamp8/Tgfb1/Rhog/Stx4a/Itgb1/Ptpn9/Map2k1/Rab11a/Adam10/Myo5a/Dag1/Epm2a/Epb41l2/Gopc/Lrp1/Egfr/Sptbn1/Arhgap44/Cltc/Arf6/Nkd2/Pik3r1/Camk2g/Gpc6/Dab2/Grasp/Dlg1/Pkdcc/Rhoq/Nrxn1/Stx3	48
GO:2000377	BP	GO:2000377	regulation of reactive oxygen species metabolic process	64/3832	200/23174	4.96618e-08	0.000305221	6.26738e-07	Cflar/Pid1/Bcl2/Atp2b4/Ptgs2/Tlr5/Cd34/Grin1/Ptgis/Klf4/Mpv17/Pkd2/Dynll1/Rac1/Cav1/Snca/Gadd45a/Hrh1/Tgfb1/Sirt2/Selenos/Nox4/Prcp/Clcn3/Klf2/Agt/Mmp8/Birc3/Icam1/Dnm2/Epor/Il18/Cryab/Smad3/Gnai2/Rhoa/Tgfbr2/Fyn/Atg5/Egfr/Il4/Eif5a/Stat3/Rock2/Hif1a/Fbln5/Agtr1a/Nqo2/Ripk1/F2rl1/Arf4/Gch1/Adgrb1/Pdgfb/Mpv17l/Cd47/Prkn/Cdkn1a/Ier3/Ticam1/Xdh/Gstp1/Jak2/Pdk3	64
GO:0050727	BP	GO:0050727	regulation of inflammatory response	99/3832	356/23174	5.12845e-08	0.000315195	6.44881e-07	Il1r1/Adora1/Pla2g4a/Ptgs2/Susd4/Gata3/Stk39/Calcrl/Cd44/Cd59a/Abhd12/Tgm2/Ptgis/Cebpb/S100a8/S100a9/Nfkb1/Gbp5/Lyn/Tnfrsf1b/Fndc4/Mvk/Trpv4/Serpine1/Tac1/Snca/Vamp8/Mgll/Il17ra/Usp18/A2m/Tnfrsf1a/Pglyrp1/Chrna7/Selenos/Ctsc/Spn/Cd81/Mfhas1/Ednra/Cyld/Cx3cl1/Cdh5/Wfdc1/Foxf1/Agt/Mmp8/Ldlr/Ets1/Nlrx1/Cd276/Uaca/Smad3/Rora/Nt5e/Il20rb/Gpx1/Enpp3/Appl2/Rhbdd3/Egfr/Il4/Tnip1/Adora2b/Pmp22/C1qbp/Nos2/…	99
GO:0001819	BP	GO:0001819	positive regulation of cytokine production	118/3832	445/23174	5.1806e-08	0.0003184	6.49096e-07	Il1r1/Stat1/Ncl/Inava/Ptgs2/Ifi204/Mndal/Tlr5/Cd34/Optn/Gata3/Prkcq/Agpat2/Ptprj/Traf6/Rasgrp1/B2m/Mavs/Plcb1/Zcchc3/Ccm2l/Src/Cd40/Sulf2/Cebpb/Gbp5/Bcl10/Ddx58/Nr4a3/Tek/Cyp2j6/Pde4b/Lurap1/Hdac1/Fgr/Tnfrsf8/Txk/Trpv4/P2rx7/Serpine1/Zc3hav1/Nod1/Eif2ak3/Tmf1/Il17ra/Clec4e/Tnfrsf1a/Clec9a/Prkd2/Bcl3/Tgfb1/Lsm14a/Furin/P2ry2/Il4ra/Spn/Irf7/Cd81/Cx3cl1/Zfpm1/Agt/Mmp8/Tirap/Nlrx1/Il18/Scamp5/Cd276/S…	118
GO:0043281	BP	GO:0043281	regulation of cysteine-type endopeptidase activity involved in apoptotic process	63/3832	196/23174	5.23167e-08	0.000321538	6.53145e-07	Stat1/Cflar/Casp8/Col4a3/Ptgs2/Gsn/Mtch2/Rag1/Cd44/Src/Mmp9/Tnfsf10/Siah2/Sfrp2/S100a8/S100a9/F3/Lef1/Ccn1/Bcl10/Vcp/Klf4/Dhcr24/Rps6ka1/Rest/Hip1r/Hip1/Cycs/Nod1/Snca/Eif2ak3/Ret/Plaur/Gpi1/Pdcd5/Arl6ip1/Gas6/Dlc1/Ndufa13/Birc3/Cryab/Uaca/Map2k5/Smad3/Foxl2/Rhoa/Gpx1/Map3k5/Ccn2/Mical1/F2r/Sox7/Dap/Myc/Nr4a1/Ppm1f/Bak1/Vegfa/Xdh/Jak2/Xiap/Bcap31/Rps6ka3	63
GO:0048771	BP	GO:0048771	tissue remodeling	62/3832	192/23174	5.50089e-08	0.000338085	6.81867e-07	Fcgr4/Itga4/Itgav/Traf6/Dll4/Rassf2/Src/Tgm2/Mmp9/Car2/Chd7/Lepr/Epha2/Abcb1b/Nos3/Fgfr3/Cd38/Tgfbr3/P2rx7/Rac1/Cav1/Ptn/Gpnmb/Rab7/Mitf/Lrrk1/Nox4/Tpp1/Angpt2/Inpp4b/Mmp2/Agt/Il18/Cspg4/Trf/Pth1r/Enpp1/Atg5/Gja1/Egfr/Adra1b/Flt4/Nf1/P3h4/Rock2/Hif1a/Klf6/Foxc1/F2r/Tnfrsf11b/Acvrl1/Tbx1/Tfrc/Erg/Bak1/Vegfa/Epas1/Ppargc1b/Lrp5/Anxa1/Lipa/Atp6ap1	62
GO:0050731	BP	GO:0050731	positive regulation of peptidyl-tyrosine phosphorylation	62/3832	192/23174	5.50089e-08	0.000338085	6.81867e-07	Adora1/Ptprj/Cd44/Prnp/Src/Cd40/Efna1/Lyn/Tal1/Hdac1/Hes5/Tnfrsf18/Agrn/Yes1/Fgfr3/Tec/Pdgfra/Kit/Areg/Cav2/Ptprz1/Tgfa/Cd4/Tnfrsf1a/Tgfb1/Lrrk1/Nox4/Grm5/Igf2/Cd81/Gas6/Arl2bp/Agt/Nrp1/Itgb1/Icam1/Il18/Cspg4/Fyn/Erbb3/Il4/Vtn/Ace/Pecam1/Adam17/Sema4d/Il6st/Htr2a/Ghr/Rictor/Enpp2/Pdgfb/Cntn1/Itga5/Hes1/Tnk2/Parp9/Vegfa/Hbegf/Jak2/Neurl1a/Gfra1	62
GO:0007204	BP	GO:0007204	positive regulation of cytosolic calcium ion concentration	93/3832	329/23174	5.58671e-08	0.000343359	6.9005e-07	Ackr3/Bcl2/Grin1/Itgav/Aplnr/Ryr3/Prnp/Plcb1/Fkbp1a/Tgm2/Oprl1/Trpc3/Selenot/Lyn/Chd7/Asph/Selenon/Sri/Htt/Cd38/Pdgfra/Kdr/Pkd2/Cmklr1/Trpv4/P2rx7/Tac1/Cav1/Adcyap1r1/Snca/Gata2/Itpr1/Cd4/Itpr2/Slc8a2/Gpr4/Tgfb1/Trpm4/P2ry2/Ric3/Swap70/Adm/Jak3/Ednra/Cacna1a/Cx3cl1/Jph3/Agt/Epor/Myo5a/Pth1r/Ccrl2/Plcd1/Ackr2/Ccr1/Fyn/Atg5/Gja1/Tbxa2r/Lrp1/Adra1b/Eif5a/Hap1/Pik3cg/Slc8a3/Ryr2/Agtr1a/Edn1/F2rl1/F2r…	93
GO:0038084	BP	GO:0038084	vascular endothelial growth factor signaling pathway	20/3832	35/23174	5.68283e-08	0.000349267	6.99441e-07	Pdgfra/Kdr/Prkd2/Cadm4/Adgra2/Gab1/Nrp1/Cd63/Flt4/Myo1c/Foxc1/Spry2/Ptp4a3/Pdgfb/Dll1/Vegfa/Xdh/Jcad/Sema6a/Ccbe1	20
GO:0031345	BP	GO:0031345	negative regulation of cell projection organization	65/3832	205/23174	5.78873e-08	0.000355775	7.09967e-07	Itm2c/Rab29/Tnr/Dnm3/Il15ra/Vim/Rtn4rl2/B2m/Sema6d/Prnp/Id1/Nlgn1/Rapgef2/Efna1/Cers2/Dab1/Rap1gap/Sema3d/Cd38/Arhgap24/Trpv4/Ptprz1/Mag/Inppl1/Dennd5a/Xylt1/Nrp1/Itgb1/Fat3/Dnm2/Prkcsh/Cspg4/Ptpn9/Neo1/Rhoa/Fyn/Zfp365/Lrp1/Kremen1/Efemp1/Pmp22/Ntn1/Aatk/Adam17/Ifrd1/Arf6/Bag5/Sema4d/Ptprg/Sema3g/Spry2/Dab2/Sema5a/Ptk2/Lrrk2/Hes1/Sema5b/H2-K1/H2-D1/Nrxn1/Sema6a/Kank1/Plxnb3/Nlgn3/Trpc5	65
GO:0006826	BP	GO:0006826	iron ion transport	21/3832	38/23174	5.86518e-08	0.000360474	7.16819e-07	Slc40a1/Steap3/Arhgap1/B2m/Cp/Steap4/Iscu/Lmtk2/Rep15/Dnm2/Trf/Snx3/Cltc/Hfe/Sfxn1/Slc25a37/Slc39a14/Tfrc/Fth1/Mmgt1/Heph	21
GO:0035418	BP	GO:0035418	protein localization to synapse	35/3832	85/23174	6.02793e-08	0.000370476	7.34133e-07	Grin1/Snap23/Map1a/Nlgn1/Tnik/Rap1a/Clstn1/Adam22/Nptx2/Clstn3/Nphs1/Stx4a/Map2k1/Rab11a/Adam10/Dag1/Arhgap44/Nlgn2/Asic2/Nptx1/Baiap2/Gphn/Homer1/Gpc6/Nptxr/Grasp/Grin2a/Dlg1/Dlgap1/Nrxn1/Rab27b/Nrxn2/Stx3/Abhd17b/Nlgn3	35
GO:0051480	BP	GO:0051480	regulation of cytosolic calcium ion concentration	103/3832	376/23174	6.36418e-08	0.000391143	7.68934e-07	Ackr3/Bcl2/Atp2b4/Atp1a2/Grin1/Itgav/Aplnr/Ryr3/Prnp/Plcb1/Fkbp1a/Tgm2/Oprl1/Trpc3/Selenot/Lyn/Chd7/Asph/Selenon/Sri/Htt/Cd38/Pdgfra/Kdr/Pkd2/Cmklr1/Trpv4/P2rx7/Gtf2i/Fzd9/Tac1/Cav1/Adcyap1r1/Snca/Gata2/Itpr1/Cd4/Kcna5/Itpr2/Slc8a2/Gpr4/Tgfb1/Trpm4/Hrc/P2ry2/Ric3/Swap70/Adm/Jak3/Ednra/Cacna1a/Cx3cl1/Jph3/Agt/Epor/Smad3/Myo5a/Pth1r/Ccrl2/Plcd1/Ackr2/Ccr1/Fyn/Atg5/Gja1/Tbxa2r/Lrp1/Adra1b/Eif5a/Hap1…	103
GO:0042310	BP	GO:0042310	vasoconstriction	39/3832	100/23174	6.37316e-08	0.000391694	7.68934e-07	Per2/Ptgs2/Atp1a2/Edn3/Rap1gds1/Drd5/Cd38/Cav1/Hrh1/Kcna5/Trpm4/Adm/Ednra/Mmp2/Cx3cl1/Agt/Icam1/Map2k1/Manf/Rhoa/Gja1/Tbxa2r/Egfr/Adra1b/Asic2/Ace/Dock4/Hif1a/Agtr1a/Edn1/F2r/Dock5/Htr2a/Ednrb/Pdgfb/Acta2/Add3/Dusp5/Apln	39
GO:0007611	BP	GO:0007611	learning or memory	84/3832	289/23174	6.37989e-08	0.000392108	7.68934e-07	Adgrb3/Abi2/En1/Ptgs2/Tnr/Ncstn/Atp1a2/Itga8/Grin1/Tanc1/Scn2a/Rag1/Eif2ak4/Map1a/Gatm/Prnp/Lrrn4/Plcb1/Oprl1/Slc7a11/Bche/Brinp1/Ppt1/Htt/Drd5/Atp8a1/Kit/Cux2/Fzd9/Nptx2/Tac1/Ptprz1/Ptn/Slc6a1/Hrh1/Shisa7/Slc8a2/Chrna7/Grm5/Igf2/Cln8/Atxn1l/Jph3/Agt/Itgb1/Ldlr/Stra6/Foxb1/Epm2a/Sgk1/S100b/Abca7/Egfr/Adra1b/Gm2a/Nf1/Nog/Ppp1r1b/Kat2a/C1ql1/Lamb1/Hif1a/Slc8a3/Shc3/Pde8b/Arf4/Htr2a/Adcy8/Arc/Zfp385…	84
GO:0061326	BP	GO:0061326	renal tubule development	40/3832	104/23174	6.81382e-08	0.000418777	8.184e-07	Eya1/Stat1/Wnt6/Bcl2/Gata3/Notch1/Cd44/Lama5/Hey1/Fat4/Wwtr1/Heyl/Hes5/Pkd2/Tgfb1/Col4a1/Irx3/Agt/Lgr5/Nog/Wnk4/Sox9/Six4/Agtr1a/Klhl3/Adamts16/Irx1/Irx2/Foxd1/Bmp4/Myc/Wnt7b/Hes1/Dlg1/Dll1/Sox8/Vegfa/Greb1l/Gpc3/Maged1	40
GO:0006733	BP	GO:0006733	oxidoreduction coenzyme metabolic process	57/3832	172/23174	6.84089e-08	0.000420441	8.18829e-07	Rpe/Pfkfb2/Nmnat2/Coq8a/Hsd11b1/Gpd2/Mtch2/Nudt17/Vcp/Pgd/Nmnat1/H6pd/P2rx7/Mdh2/Foxk1/Bpgm/Tpi1/Ndufa9/Gpi1/Aspdh/Ldha/Aldoa/Taldo1/Ido2/Pgls/Coq9/Idh3a/Mpi/Adpgk/Pkm/Me1/Gpd1l/Pfkl/Coq10a/Ogdh/Mdh1/Stat3/Dld/Nampt/Hif1a/Entpd5/Dlst/Prxl2c/Tkt/Htr2a/Prkaa1/Myc/Pfkm/Ier3/Nudt12/Eno1b/Me2/Prdx5/Nmrk1/Pgam1/Pgk1/Pdha1	57
GO:0051099	BP	GO:0051099	positive regulation of binding	65/3832	206/23174	7.10509e-08	0.000436679	8.4754e-07	Ralb/Gata3/Edf1/Traf6/Hipk3/B2m/Ddrgk1/Fkbp1a/Mmp9/Nmd3/Rapgef2/Ufl1/Klf4/Txn1/Epb41/Eno1/Agrn/Eif2b4/Hip1r/Lfng/Cav1/Cald1/Hipk2/Ephb6/Eif2ak3/Plxnd1/Caprin2/Plaur/Tgfb1/Sirt2/Spon1/Eif3c/Amfr/Ripor1/Mmp8/Tirap/Anxa2/Lrp1/Traf4/Vtn/Lgals9/Ace/Arf6/Eif2s1/Mark3/Hfe/Foxc1/Bmp4/Cln5/Myc/Eif3d/Lrrk2/Rapgef3/Eif4g1/Hes1/Dtx3l/Parp9/App/Prkn/Ticam1/Ddx11/Mbd2/Jak2/Tcf7l2/Fmr1	65
GO:0098659	BP	GO:0098659	inorganic cation import across plasma membrane	34/3832	82/23174	7.56067e-08	0.000464679	8.95748e-07	Slc9a2/Slc39a10/Atp1a2/Kcnj10/Slc30a1/Slc39a12/Prnp/Atp1a1/Kcnd3/Slc39a8/Slc31a1/Slc9a1/Iscu/Slc12a9/Kcnj8/Abcc9/Slc8a2/Trpm4/Slc12a4/Slc9a9/Fyn/Hcn2/Atp1b2/Kcnj16/Kcnj2/Slc8a3/Hfe/Agtr1a/Slc39a14/Kcnj4/Kcnj6/Kcnj15/Slc12a2/Slc9a7	34
GO:0099587	BP	GO:0099587	inorganic ion import across plasma membrane	34/3832	82/23174	7.56067e-08	0.000464679	8.95748e-07	Slc9a2/Slc39a10/Atp1a2/Kcnj10/Slc30a1/Slc39a12/Prnp/Atp1a1/Kcnd3/Slc39a8/Slc31a1/Slc9a1/Iscu/Slc12a9/Kcnj8/Abcc9/Slc8a2/Trpm4/Slc12a4/Slc9a9/Fyn/Hcn2/Atp1b2/Kcnj16/Kcnj2/Slc8a3/Hfe/Agtr1a/Slc39a14/Kcnj4/Kcnj6/Kcnj15/Slc12a2/Slc9a7	34
GO:0036293	BP	GO:0036293	response to decreased oxygen levels	70/3832	228/23174	7.66771e-08	0.000471257	9.05351e-07	Bcl2/Adora1/Cd34/Notch1/Eng/Dpp4/Scn2a/Cat/Tm9sf4/Ptgis/Chrna4/Tek/Plk3/Slc9a1/Ece1/Cpeb2/Cd38/Sod3/Kdr/Rest/Flt1/Cav1/Kcnd2/Itpr1/Itpr2/Sirt2/Chrna7/Cpeb1/Ucp2/Prkcb/Plat/Eif4ebp1/Hmox1/Ednra/Mmp2/Hyou1/Il18/Sdhd/Cryab/Smad3/Map2k1/Rora/Higd1a/Limd1/Hsp90b1/Cpeb4/Alkbh5/Nos2/Nf1/P4hb/Rock2/Adam17/Hif1a/Zfp36l1/Slc8a3/Acot2/Ryr2/Edn1/Camk2g/Rgcc/Myc/Tmbim6/Fndc1/Ppard/Vegfa/Epas1/Cybb/Fundc1/Pdk3…	70
GO:0019362	BP	GO:0019362	pyridine nucleotide metabolic process	53/3832	156/23174	7.75488e-08	0.000476615	9.12549e-07	Rpe/Pfkfb2/Nmnat2/Hsd11b1/Gpd2/Mtch2/Nudt17/Vcp/Pgd/Nmnat1/H6pd/P2rx7/Mdh2/Foxk1/Bpgm/Tpi1/Gpi1/Aspdh/Ldha/Aldoa/Taldo1/Ido2/Pgls/Idh3a/Mpi/Adpgk/Pkm/Me1/Gpd1l/Pfkl/Ogdh/Mdh1/Stat3/Dld/Nampt/Hif1a/Entpd5/Dlst/Prxl2c/Tkt/Htr2a/Prkaa1/Myc/Pfkm/Ier3/Nudt12/Eno1b/Me2/Prdx5/Nmrk1/Pgam1/Pgk1/Pdha1	53
GO:0051056	BP	GO:0051056	regulation of small GTPase mediated signal transduction	77/3832	259/23174	7.96473e-08	0.000489513	9.34088e-07	Arfgef1/Arhgef4/Farp2/Itpkb/Notch1/Dennd1a/Rasgrp1/Src/Prex1/Spry1/Cdc42se1/Csf1/Vav3/Ssx2ip/Rap1gap/Arhgef10l/Plekhg5/Arhgap24/Mmd2/Arhgef5/Adcyap1r1/Iqsec1/Fgd5/Eps8/Arhgap35/Gpr4/Cadm4/Rasgrp4/Rasip1/Akap13/Rasa3/Arhgef10/Dlc1/Fbxo8/Psd3/Ripor1/Nrp1/Itgb1/Dnm2/Cbl/Map2k1/Cgnl1/Rasgrf1/Arhgap18/Adra1b/Arhgap44/Arhgef15/Tnfaip1/Nf1/Arhgdia/Itsn2/Arf6/Sos2/Plekhg3/Net1/F2rl1/F2r/F2rl2/Arhgef28/Cc…	77
GO:0007045	BP	GO:0007045	cell-substrate adherens junction assembly	32/3832	75/23174	8.10985e-08	0.000498432	9.44746e-07	Bcl2/Itgav/Ptprj/Src/Tek/Tesk2/Col16a1/Limch1/Kdr/Pxn/Rac1/Dlc1/Nrp1/Peak1/Smad3/Ptprk/Lims1/Lrp1/Dusp3/Actn1/Dusp22/Fermt2/Enpp2/Ptk2/Acvrl1/Ppm1f/Apod/Phldb2/Vegfa/Rhod/Slk/Arhgap6	32
GO:0048041	BP	GO:0048041	focal adhesion assembly	32/3832	75/23174	8.10985e-08	0.000498432	9.44746e-07	Bcl2/Itgav/Ptprj/Src/Tek/Tesk2/Col16a1/Limch1/Kdr/Pxn/Rac1/Dlc1/Nrp1/Peak1/Smad3/Ptprk/Lims1/Lrp1/Dusp3/Actn1/Dusp22/Fermt2/Enpp2/Ptk2/Acvrl1/Ppm1f/Apod/Phldb2/Vegfa/Rhod/Slk/Arhgap6	32
GO:0019318	BP	GO:0019318	hexose metabolic process	69/3832	224/23174	8.20543e-08	0.000504306	9.52694e-07	Per2/Pfkfb2/Gpd2/Chst1/Src/Serp1/Acadm/Pgm1/Lepr/Oma1/Zmpste24/Sesn2/H6pd/Man2b2/Pgm2/Acacb/Brat1/Foxk1/B3glct/Fam3c/Gfpt1/Tpi1/Gpi1/Ldha/Man2a2/Dgat2/Inppl1/Aldoa/Chst15/Igf2/Irs2/Mlycd/Mpi/Adpgk/Pkm/Rora/Glb1/Fuca2/Enpp1/Pofut2/Pfkl/Midn/Igfbp3/Grb10/Adra1b/Nfe2l1/Kat2a/G6pc3/Hif1a/Aldh5a1/Pik3r1/Prkaa1/Myc/Pfkm/Apod/Prkn/Pgp/Man2a1/Nr3c1/Ptpn2/Cpt1a/Lrp5/Ppp1ca/Pcx/Rbp4/Tcf7l2/Pdk3/Pgk1/Pdha1	69
GO:0050905	BP	GO:0050905	neuromuscular process	48/3832	136/23174	8.33213e-08	0.000512092	9.6419e-07	Pnkd/Tnr/Grin1/Scn1a/Foxs1/Glrb/Nbn/Nr4a3/Grin3a/Zmpste24/Rest/Grid2/Kcna1/Npas1/Opa3/Tpp1/Cln8/Csmd1/Cacna1a/Aars/Jph3/Aplp2/Stra6/Hexa/Myo5a/Uba5/Fabp7/Pcdh15/Adarb1/Gm2a/Pmp22/Nlgn2/Ankfn1/Cntnap1/Gaa/Npas3/Pde8b/Gch1/Slitrk6/Fgf14/Scn8a/Grin2a/Fgf12/Adcy5/App/Prkn/Clic5/Nrxn1	48
GO:0048608	BP	GO:0048608	reproductive structure development	118/3832	449/23174	8.75334e-08	0.00053798	1.00958e-06	Ptprn/Serpine2/Bcl2/Pla2g4a/Ptgs2/Gata3/Notch1/Lrp2/Itga4/Itgav/Cd44/Eif2s2/Src/Ptgis/Cebpb/Bmp7/Adrm1/Col9a3/Hey1/Tiparp/Sfrp2/Vcam1/Lef1/Ccn1/Chd7/Dmrta1/Dhcr24/Abcb1a/Nos3/Eif2b4/Pdgfra/Kit/Kdr/Pkd2/Tbx3/Tmed2/Vgf/Serpine1/Lfng/Ptn/Gata2/Tmf1/Vwf/Ybx3/Plaur/Erf/Gas2/Nr2f2/Fzd4/Adm/Htra1/Igf2/Cdkn1c/Ccnd1/Gab1/Mmp2/Agt/Pgr/Icam1/Epor/Stra6/Map2k1/Foxl2/Plcd1/Map7/Hey2/Prdm1/Gja1/Sgpl1/Jmjd1c/Ar…	118
GO:0052548	BP	GO:0052548	regulation of endopeptidase activity	93/3832	332/23174	8.89635e-08	0.00054677	1.02269e-06	Stat1/Cflar/Casp8/Serpine2/Col4a3/Ptgs2/Grin1/Gsn/Mtch2/Rag1/Cd44/Src/Mmp9/Tnfsf10/Siah2/Sfrp2/Efna1/S100a8/S100a9/F3/Lef1/Ccn1/Bcl10/Lyn/Asph/Vcp/Klf4/Dhcr24/Hdac1/Rps6ka1/Htt/Rest/Hip1r/Hip1/Serpine1/Cycs/Nod1/Snca/Eif2ak3/Timp4/Ret/Plaur/Gpi1/Pdcd5/Furin/Serpinh1/Arl6ip1/Gas6/Dlc1/Spock3/Ndufa13/Agt/Birc3/Cryab/Uaca/Map2k5/Smad3/Foxl2/Rhoa/Gpx1/Ltf/Map3k5/Ccn2/Fyn/Mical1/Vsir/Timp3/Cyfip2/Vtn/…	93
GO:0014812	BP	GO:0014812	muscle cell migration	40/3832	105/23174	9.25951e-08	0.000569089	1.06093e-06	Arpc2/Bcl2/Sema6d/Src/F3/Nr4a3/Akirin1/Serpine1/Pdgfa/Nox4/P2ry2/Plat/Agt/Pdgfd/Pgr/Il18/Myo5a/Lrp1/Igfbp3/Vtn/Rps6kb1/Ace/Dock4/Six4/Net1/Il6st/Dock5/Has2/Trib1/Myc/Ptk2/Pdgfb/Rapgef3/Adamts1/Ppard/Rab5a/Pcsk5/Anxa1/Prkg1/Zfp950	40
GO:1903510	BP	GO:1903510	mucopolysaccharide metabolic process	27/3832	58/23174	9.30252e-08	0.000571733	1.06128e-06	Chpf/Itih5/Chst1/Cd44/Chst14/Nfkb1/Impad1/Ugdh/Tgfb1/Xylt1/Spock3/Csgalnact1/Chst5/Glce/Dse/Spock2/Chst3/Chst11/Cltc/Xylt2/Habp4/Egflam/Has2/Pdgfb/Ccnd3/Chst7/Bgn	27
GO:0043491	BP	GO:0043491	protein kinase B signaling	60/3832	186/23174	9.32344e-08	0.000573019	1.06128e-06	Arfgef1/Lmbrd1/Phlpp1/Phlda3/Gata3/Eng/Ptprj/Src/Cd40/Pear1/F3/Klf4/Tek/Plk3/Sesn2/Otud3/Epha2/Kdr/Sh2b3/Pdgfa/Ret/Tgfb1/Sirt2/Rras/Rcn3/Nox4/Igf2/F10/Gas6/Mfhas1/Inpp4b/Cx3cl1/Itgb1/Sesn3/Il18/Lingo1/Dag1/Gpx1/Egfr/C1qbp/Rps6kb1/Tmem100/Sox9/Slc9a3r1/Pik3cg/Zfp36l1/Spry2/Rictor/Sema5a/Mtdh/Ptk2/Dlg1/Vegfa/Mydgf/Xdh/Nrxn1/Hbegf/Lox/Tcf7l2/Mtm1	60
GO:1903037	BP	GO:1903037	regulation of leukocyte cell-cell adhesion	83/3832	287/23174	9.69425e-08	0.000595809	1.09989e-06	Igfbp2/Itpkb/Mia3/Hlx/Gata3/Prkcq/Nrarp/Dpp4/Itga4/Rag1/Traf6/Cd44/Rasgrp1/Prnp/Cebpb/Vcam1/Bcl10/Nr4a3/Klf4/Mad1l1/Cav1/Ephb6/Gpnmb/Loxl3/Cxcl12/Wnk1/Cd4/Tgfb1/Lrrc32/Il4ra/Spn/Itgal/Igf2/Cd81/Ccl25/Jak3/Cyld/Cbfb/Nfat5/Icam1/Ets1/Il18/Cd276/Il20rb/Nck1/Rhoa/Tgfbr2/Vsir/Xbp1/Peli1/Il4/Irf1/Pik3r6/Lgals9/Stat5b/Dusp3/Zbtb1/Lgals8/Hfe/Dusp22/Cd83/Il6st/Selenok/Bmp4/Egr3/Has2/Bcl6/Hes1/Dlg1/Tfrc/Cd…	83
GO:0010952	BP	GO:0010952	positive regulation of peptidase activity	53/3832	157/23174	9.83996e-08	0.000604764	1.1128e-06	Stat1/Casp8/Col4a3/Grin1/Gsn/Mtch2/Ddrgk1/Tnfsf10/Sfrp2/Efna1/S100a8/S100a9/F3/Ccn1/Bcl10/Lyn/Asph/Vcp/Rest/Hip1r/Hip1/Cycs/Nod1/Snca/Eif2ak3/Antxr1/Ret/Pdcd5/Rcn3/Dlc1/Ndufa13/Uaca/Smad3/Ctsh/Foxl2/Rhoa/Map3k5/Ccn2/Fyn/Vsir/Cyfip2/Stat3/Rock2/F2r/Sox7/Dap/Myc/Ppm1f/Bak1/Xdh/Mbp/Jak2/Bcap31	53
GO:0001701	BP	GO:0001701	in utero embryonic development	128/3832	498/23174	9.97748e-08	0.000613216	1.1247e-06	Sox17/Resp18/Capn2/Flvcr1/Slc30a1/Gata3/St8sia6/Notch1/Lrp1b/Ubr3/Itga4/Nckap1/Itgav/Psmc3/Rcn1/Cops2/Eif2s2/Cebpb/Bmp7/Sox18/Hey1/Tbl1xr1/Mecom/Skil/Tm4sf1/Mbnl1/Slc39a1/Vcam1/Sec24d/Lef1/Ccn1/Chd7/Nbn/Kdm4c/Tie1/Inpp5b/Eno1/Nos3/Tapt1/Pdgfra/Pkd2/Tgfbr3/Tbx3/Cdk2ap1/Tmed2/Sbds/Gna12/Gata2/Tead4/Ybx3/Sox5/Erf/Dll3/Gpi1/Tshz3/Tjp1/Nr2f2/Adm/Sox6/Plpp4/Igf2/Cdkn1c/Coprs/Fgfr1/Gatad2a/Klf2/Ednra/Ga…	128
GO:0001952	BP	GO:0001952	regulation of cell-matrix adhesion	42/3832	113/23174	1.00833e-07	0.000619723	1.13296e-06	Bcl2/Ptprj/Src/Adam15/Csf1/Tek/Col16a1/Limch1/Kdr/Serpine1/Rac1/Ccl25/Plekha2/Dlc1/Cdh13/Disc1/Nrp1/Peak1/Smad3/Pik3cb/Dag1/Utrn/Lims1/Lrp1/Nf1/Dusp3/Dusp22/Pik3r1/Enpp2/Ptk2/Acvrl1/Ppm1f/Bcl6/Apod/Phldb2/Vegfa/Rhod/Pcsk5/Slk/Cask/Dmd/Arhgap6	42
GO:1902905	BP	GO:1902905	positive regulation of supramolecular fiber organization	62/3832	195/23174	1.03583e-07	0.00063662	1.15832e-06	Abi2/Arpc2/Prkcq/Gsn/Nckap1/Id1/Rhoc/Synpo2/Arhgef10l/Wdr1/Limch1/Trpv4/Pxn/Arpc3/Hip1r/Rac1/Arpc1b/Tac1/Cav1/Arhgef5/Vasp/Nphs1/Arpin/Nox4/Fchsd2/Swap70/Arhgef10/Colgalt1/Cx3cl1/Nrp1/Icam1/Smad3/Tpm1/Nck1/Rhoa/Ccn2/Wasf1/Rhobtb1/Arhgef15/Pfn1/Myo1c/Baiap2/Rock2/Arf6/Edn1/Jmy/F2rl1/Iqgap2/Map3k1/Rhobtb2/Sorbs3/Rgcc/Rictor/Sema5a/Cdc42ep1/Rapgef3/Ppm1f/Dlg1/Cd47/App/Snx9/Fer	62
GO:1905606	BP	GO:1905606	regulation of presynapse assembly	19/3832	33/23174	1.03755e-07	0.00063768	1.15832e-06	Nlgn1/Slitrk3/Snca/Grid2/Clstn3/Lrrc4b/Ntrk3/Nlgn2/Lrfn5/Mdga2/Arf6/Slitrk1/Eif4g1/Il1rap/App/Nrxn1/Cbln2/Slitrk2/Il1rapl1	19
GO:0016358	BP	GO:0016358	dendrite development	84/3832	292/23174	1.04969e-07	0.000645138	1.16812e-06	Adgrb3/Hecw2/Abi2/Dock10/Camsap2/Dnm3/Nsmf/Grin1/Map1a/Btbd3/Id1/Prex1/Bmp7/Nlgn1/Tnik/Mfn1/Rapgef2/Efna1/Pdlim5/Grin3a/Ptprd/Dab1/Cdc42/Cux2/Ache/Sdk1/Rac1/Tmem106b/Ptprz1/Ptn/Camk1/Caprin2/Pak4/Chrna7/Cacna1a/Disc1/Nrp1/Itgb1/Fat3/Sept7/Adam10/Myo6/Rhoa/Ss18l2/Syne1/Sgk1/Fyn/Zfp365/Cobl/Arhgap44/Ntn1/Nlgn2/Scarf1/Baiap2/Rock2/Arf6/Sema4d/Arf4/Slitrk5/Rap2a/Sdc2/Csmd3/Arc/Lrrk2/Crkl/Ephb3/Il1rap…	84
GO:0097581	BP	GO:0097581	lamellipodium organization	34/3832	83/23174	1.07806e-07	0.000662574	1.19257e-06	Arhgef4/Arpc2/Nckap1/Cd44/Src/Vav3/Akirin1/Wasf2/Epha2/Kit/Pxn/Rac1/Wasf3/Ptpro/Cdh13/Itgb1/Dnm2/Snx1/Nck1/Wasf1/Pmp22/Rreb1/Vcl/Spata13/Golph3/Enpp2/Parvb/Twf1/Fer/Snx2/Rhod/Kank1/Ablim1/Plxnb3	34
GO:0050708	BP	GO:0050708	regulation of protein secretion	126/3832	489/23174	1.07938e-07	0.000663385	1.19257e-06	Fn1/Ncl/Per2/Inhbb/Pfkfb2/Tlr5/Cd34/Gata3/Prkcq/Dnajc1/Traf6/Rasgrp1/Mavs/Src/Cd40/Kcnb1/Myt1/Serp1/Syt11/Slc16a1/Hadh/Lyn/Ddx58/Tek/Cyp2j6/Lepr/Hdac1/Fgr/Tnfrsf1b/Cyp51/Sri/Cd38/Rest/Trpv4/Dynll1/P2rx7/Aacs/Rac1/Ica1/Vamp8/Jagn1/Il17ra/Clec4e/Clec9a/Tm7sf3/Tgfb1/Gpi1/Trpm4/Lrrc32/Ucp2/Pde3b/Il4ra/Stx4a/Kcnq1/Irs2/Gas6/Adam9/Rab11fip1/Cx3cl1/Agt/Mmp8/Scamp5/Cd276/Neo1/Hmgn3/Akap12/Atg5/Gja1/Mcu/S…	126
GO:0071375	BP	GO:0071375	cellular response to peptide hormone stimulus	73/3832	243/23174	1.08193e-07	0.000664953	1.19257e-06	Lmbrd1/Stat1/Pid1/Inhbb/Nucks1/Prkcq/Grb14/Ptpra/Plcb1/Src/Adrm1/Car2/Prkci/Nfkb1/Nr4a3/Dennd4c/Leprot/Slc9a1/Cpeb2/Pxn/Cav2/Cav1/Cpeb1/Inppl1/Pde3b/Prkcb/Ptpre/Igf2/Irs2/Eif4ebp1/Agt/Sesn3/Il18/Pkm/Myo5a/Nck1/Gnai2/Sgk1/Enpp1/Appl2/Stat6/Cdk2/Xbp1/Grb10/Irf1/Myo1c/Rps6kb1/Stxbp4/Stat5b/Stat3/Rab10/Rock2/Zfp36l1/Agtr1a/Gkap1/Pik3r1/Tbc1d4/Ghr/Prkaa1/Adcy8/Ptk2/Nr4a1/Prkdc/Ccnd3/Fer/Rab31/Rhoq/Ptp…	73
GO:0010769	BP	GO:0010769	regulation of cell morphogenesis involved in differentiation	94/3832	338/23174	1.09982e-07	0.000675949	1.20847e-06	Adgrb3/Hecw2/Abi2/Fn1/Arpc2/Tnr/Dnm3/Vim/Nsmf/Grin1/Lrrc4c/Sema6d/Id1/Prex1/Nlgn1/Tnik/Skil/Mfn1/Rapgef2/Efna1/Pdlim5/Ptprd/Dab1/Agrn/Sema3d/Cux2/Ache/Rac1/Ptprz1/Mgll/Plxnd1/Cxcl12/Ret/Caprin2/Arhgap35/Actn4/Mag/Ntrk3/Dock1/Cacna1a/Calr/Disc1/Nrp1/Dnm2/Map2k1/Rab11a/Adam10/Snap91/Ss18l2/Syne1/Ust/Sgk1/Lims1/Lrp1/Arhgap44/Ntn1/C1qbp/Omg/Rnd2/Baiap2/Aatk/Ifrd1/Net1/Rreb1/Sema4d/Sema3g/Dock5/Slitrk…	94
GO:0043547	BP	GO:0043547	positive regulation of GTPase activity	67/3832	217/23174	1.13808e-07	0.000699462	1.24657e-06	Tbc1d8/Dock10/Dennd1b/Rabgap1l/F11r/Rgs7/Rsu1/Dennd1a/Pkp4/Itga6/Rasgrp1/Cd40/Prex1/Gnas/Rapgef2/Rap1a/Rap1gds1/Tbc1d2/Asap3/Rap1gap/Epha2/Agrn/Tbc1d1/Arhgap24/Evi5/Fzd10/Cav2/Arhgef5/Iqsec1/Arhgap35/Ntrk3/Arap1/Rhog/Evi5l/Ccl25/Grtp1/Arhgef10/Cx3cl1/Itgb1/Icam1/Map2k1/Gnb5/Rasgrf1/Lims1/Sgsm2/Nf1/Rundc1/Arhgap27/Snx13/Net1/Sema4d/F2rl1/F2r/Ccdc125/Snx18/Tbc1d4/Dock9/Rapgef3/Crkl/Adprh/Snx9/Tbc1d…	67
GO:0048871	BP	GO:0048871	multicellular organismal homeostasis	125/3832	485/23174	1.19328e-07	0.000733391	1.30294e-06	Slc40a1/Acadl/Per2/Bcl2/Adora1/Inava/Pla2g4a/Ptgs2/Ildr2/Fcgr4/Fh1/G0s2/Cd34/Notch1/Stk39/Itgav/Traf6/Map1a/Gatm/Id1/Src/Cebpb/Gnas/Car2/Bbs12/Wwtr1/Gba/Csf1/Elovl6/Hadh/Decr1/Nr4a3/Lepr/Oma1/Cpt2/Elovl1/Nos3/Wfs1/Cd38/Kdr/Plac8/Cmklr1/Acacb/Trpv4/P2rx7/Ache/Rac1/Cav1/Rab7/Gata2/Adipor2/Strap/Rcn3/Lrrk1/Homer2/Nox4/Prcp/Ucp2/Tpp1/Tub/Ampd3/Il4ra/Cln8/Adrb3/Acsl1/Clcn3/Zfp423/Irx3/Cdh3/Fa2h/Ankrd1…	125
GO:2001257	BP	GO:2001257	regulation of cation channel activity	54/3832	162/23174	1.20412e-07	0.000740054	1.31067e-06	Stom/Lrrc55/Fkbp1a/Mmp9/Chrna4/Oprl1/Nlgn1/S100a1/Asph/Pde4b/Selenon/Sri/Htt/Stim2/Anxa3/Pkd2/Nipsnap2/Cav1/Dysf/Kcna1/Cracr2a/Shisa7/Stim1/Kcnq1/Cacna1a/Jph3/Myo5a/Gnb5/Rasgrf1/Akap7/Shisa6/Pirt/Nlgn2/Asic2/Hap1/Cacng4/Rgs9/Homer1/Pde4d/Slmap/Bmp4/Fgf14/Arc/Shisa9/Fgf12/Dlg1/Ehd3/Nrxn1/Neto1/Ahnak/Prkg1/Fmr1/Dmd/Nlgn3	54
GO:0048661	BP	GO:0048661	positive regulation of smooth muscle cell proliferation	40/3832	106/23174	1.25108e-07	0.000768915	1.35754e-06	Stat1/Ptgs2/Calcrl/Traf6/Tgm2/Mmp9/Nr4a3/Ldlrap1/Hes5/Hmox1/Mmp2/Cx3cl1/Cdh13/Agt/Pdgfd/Il18/Gnai2/Tgfbr2/Map3k5/Egfr/Rps6kb1/Stat5b/Id2/Nampt/Mnat1/Hif1a/Nqo2/Edn1/Bmp4/Abcc4/Myc/Ptk2/Pdgfb/Irak4/Adamts1/Notch3/Vegfa/Rab5a/Hbegf/Jak2	40
GO:0044242	BP	GO:0044242	cellular lipid catabolic process	62/3832	196/23174	1.27303e-07	0.000782404	1.37707e-06	Hibch/Acadl/Neu4/Pla2g4a/Slc27a4/Gpcpd1/Plcb1/Abhd12/Pld1/Etfdh/Gba/Abcd3/Hadh/Acadm/Decr1/Cpt2/Faah/Sesn2/Crot/Hadha/Hadhb/Srd5a3/Acacb/Scarb1/Mgll/Sirt2/Abhd2/Acer3/Smpd1/Pnpla2/Irs2/Asah1/Mlycd/Ldlr/Etfa/Hexa/Lipc/Acad11/Abhd5/Aig1/Echdc1/Smpd2/Smpdl3a/Sgpl1/Lrp1/Gm2a/Acox1/Pik3cg/Acot2/Galc/Abhd6/Amacr/Enpp2/Naga/Ppard/Abhd3/Hsd17b4/Cpt1a/Plcb3/Dagla/Asah2/Acsl5	62
GO:0046496	BP	GO:0046496	nicotinamide nucleotide metabolic process	52/3832	154/23174	1.28218e-07	0.000788029	1.38268e-06	Rpe/Pfkfb2/Nmnat2/Hsd11b1/Gpd2/Mtch2/Nudt17/Vcp/Pgd/Nmnat1/H6pd/P2rx7/Mdh2/Foxk1/Bpgm/Tpi1/Gpi1/Aspdh/Ldha/Aldoa/Taldo1/Ido2/Pgls/Idh3a/Mpi/Adpgk/Pkm/Me1/Gpd1l/Pfkl/Ogdh/Mdh1/Stat3/Dld/Nampt/Hif1a/Entpd5/Dlst/Prxl2c/Tkt/Htr2a/Prkaa1/Myc/Pfkm/Ier3/Nudt12/Eno1b/Me2/Prdx5/Pgam1/Pgk1/Pdha1	52
GO:0060047	BP	GO:0060047	heart contraction	65/3832	209/23174	1.29663e-07	0.000796907	1.38988e-06	Atp2b4/Adora1/Tnnt2/Atp1a2/Scn1a/Edn3/S100a1/Atp1a1/Kcnd3/Pde4b/Zmpste24/Slc9a1/Cdc42/Agrn/Sri/Nos3/Atp2a2/Tac1/Cav1/Kcna5/Kcnj8/Dmpk/Trpm4/Hrc/Chrna7/Adm/Glrx3/Kcnq1/Sgcz/Agt/Tpm1/Cacna2d2/Gpx1/Gpd1l/Ccn2/Hey2/Atg5/Gja1/Ctnna3/Smtn/Adra1b/Sgcd/Ace/Kcnj2/Gaa/Chga/Ryr2/Edn1/Smad5/Pik3r1/Pde4d/Cacna1d/Gch1/Myh6/Dlg1/Atp5j/Ehd3/Epas1/Dsc2/Hbegf/Slc1a1/Jak2/Prkg1/Apln/Dmd	65
GO:0062012	BP	GO:0062012	regulation of small molecule metabolic process	97/3832	353/23174	1.29685e-07	0.000797042	1.38988e-06	Acadl/Pid1/Pfkfb2/Atp2b4/Pla2g4a/Ptgs2/Fh1/Hsd11b1/Mtch2/Src/Slc7a11/Nfkb1/Acadm/Vcp/Nr4a3/Ttc39b/Lepr/Zmpste24/Fabp3/Sesn2/Nos3/Insig1/Kit/Rest/Iscu/Acacb/P2rx7/Foxk1/Cav1/Fam3c/Adcyap1r1/Snca/Eif2ak3/Gfpt1/Tgfb1/Dgat2/Igf2/Dhcr7/Irs2/Erlin2/Cacna1a/Mlycd/Agt/Ldlr/Map2k1/Rora/Elovl5/Me1/Rhoa/Pth1r/Plcd1/Enpp1/Midn/Appl2/Shmt2/Sec14l2/Igfbp3/Grb10/Adra1b/Adora2b/Nos2/Cltc/Nfe2l1/Kat2a/Stat3/Hif1a…	97
GO:0022612	BP	GO:0022612	gland morphogenesis	51/3832	150/23174	1.31627e-07	0.00080898	1.40637e-06	Cflar/Bcl2/Notch1/Cd44/Src/Tgm2/Sulf2/Cebpb/Bmp7/Lama5/Csf1/Rps6ka1/Epha2/Areg/Tbx3/Pdgfa/Cav1/Ptn/Tgfa/Itpr1/Plxnd1/Tgfb1/Hpn/Fgfr1/Mmp2/Nrp1/Pgr/Dag1/Tgfbr2/Lims1/Stat6/Xbp1/Egfr/Ntn1/Nog/Etv4/Sox9/Slc9a3r1/Sostdc1/Nrg3/Bmp4/Pdgfb/Rarg/Snai2/Etv5/Lama1/Lims2/Nr3c1/Slc12a2/Lrp5/Msn	51
GO:0014909	BP	GO:0014909	smooth muscle cell migration	36/3832	91/23174	1.32326e-07	0.000813273	1.40951e-06	Arpc2/Bcl2/Sema6d/Src/F3/Nr4a3/Serpine1/Pdgfa/Nox4/P2ry2/Plat/Agt/Pdgfd/Pgr/Il18/Myo5a/Lrp1/Igfbp3/Vtn/Rps6kb1/Ace/Dock4/Il6st/Dock5/Has2/Trib1/Myc/Ptk2/Pdgfb/Rapgef3/Adamts1/Ppard/Rab5a/Pcsk5/Prkg1/Zfp950	36
GO:0048705	BP	GO:0048705	skeletal system morphogenesis	77/3832	262/23174	1.3468e-07	0.000827746	1.43022e-06	Eya1/Nab1/Prrx1/Flvcr1/Matn4/Bmp7/Gnas/Col20a1/Tiparp/Sfrp2/Slc39a1/Col11a1/Impad1/Mmp16/Frem1/Zmpste24/Matn1/Fgr/Hspg2/Alpl/Vwa1/Insig1/Fgfr3/Pdgfra/Trpv4/P2rx7/Acan/Serpinh1/Inppl1/Csgalnact1/Hhip/Mmp2/Glg1/Ankrd11/Barx2/Sik3/Smad3/Anxa2/Col12a1/Ltf/Tgfbr2/Mthfd1l/Ccn2/Sgpl1/Arid5b/Col6a2/Col6a1/Chst11/Nab2/Anxa6/Rflnb/Tbx4/Nog/Axin2/Sox9/Asxl2/Six4/Trip11/Foxc1/Ror2/Bmp4/Grhl2/Has2/Myc/Rarg/Tb…	77
GO:0009914	BP	GO:0009914	hormone transport	101/3832	372/23174	1.36469e-07	0.000838741	1.44482e-06	Ptprn/Per2/Inhbb/Pfkfb2/Adora1/Ildr2/Gata3/Lrp2/Snap23/Kcnb1/Gnas/Edn3/Myt1/Serp1/Selenot/Slc16a1/Stxbp3/Hadh/Lyn/Chd7/Lepr/Hdac1/Sri/Abcb1a/Htt/Cd38/Rest/Trpv4/Dynll1/Tbx3/Aacs/Vgf/Rac1/Tac1/Ica1/Vamp8/Tmf1/Jagn1/Tm7sf3/Ltbp4/Trpm4/Fzd4/Ucp2/Adm/Pde3b/Stx4a/Kcnq1/Irs2/Fgfr1/Rab11fip1/Cacna1a/Exoc3l/Agt/Snx19/Myo5a/Hmgn3/Foxl2/Gja1/Mcu/Pfkl/Midn/Hmga2/Lrp1/Selenom/Igfbp3/Egfr/Nlgn2/Nos2/Stxbp4/Hi…	101
GO:1903671	BP	GO:1903671	negative regulation of sprouting angiogenesis	16/3832	25/23174	1.37019e-07	0.000842121	1.44624e-06	Notch1/Creb3l1/Spred1/Dll4/Klf4/Stard13/Adamts9/Klf2/Map2k5/Rhoa/Tbxa2r/Epn2/Meox2/Mmrn2/Card10/Sema6a	16
GO:0043409	BP	GO:0043409	negative regulation of MAPK cascade	56/3832	171/23174	1.39599e-07	0.000857977	1.46902e-06	Phlpp1/Dusp19/Ptprj/Hipk3/Spred1/Dusp2/Bmp7/Mecom/Spry1/E130311K13Rik/Sfrp2/Gba/Efna1/Cdc42se1/Lyn/Klf4/Errfi1/Emilin1/Taok3/Sh2b3/P2rx7/Cav1/Dusp16/Spred3/Ptpn5/Chrna7/Inppl1/Smpd1/Dusp26/Cyld/Dusp7/Dag1/Cnksr3/Timp3/Dusp6/Ptprr/Xbp1/Spred2/Tnip1/Mapk7/Nf1/Dusp3/Slc9a3r1/Ranbp9/F2rl1/Bmp4/Spry2/Dab2/Dlg1/Spry4/Sema6a/Ptpn2/Gstp1/Dusp5/Dusp9/Dmd	56
GO:0036503	BP	GO:0036503	ERAD pathway	37/3832	95/23174	1.43143e-07	0.000879759	1.49868e-06	Uggt1/Ubxn4/Edem3/Tor1a/Hspa5/Dnajc10/Usp13/Dnajb14/Vcp/Ecpas/Wfs1/Aup1/Rcn3/Svip/Selenos/Erlin2/Ubxn8/Amfr/Stt3b/Dnajb12/Hsp90b1/Os9/Sdf2/Rnft1/Trim25/Ccdc47/Dnajb9/Pomt2/Sel1l/Uggt2/Ubac2/Rnf139/Sdf2l1/Nrros/Usp25/Syvn1/Bcap31	37
GO:0046879	BP	GO:0046879	hormone secretion	99/3832	363/23174	1.43279e-07	0.00088059	1.49868e-06	Ptprn/Per2/Inhbb/Pfkfb2/Adora1/Ildr2/Gata3/Lrp2/Snap23/Kcnb1/Gnas/Edn3/Myt1/Serp1/Selenot/Slc16a1/Stxbp3/Hadh/Lyn/Chd7/Lepr/Hdac1/Sri/Htt/Cd38/Rest/Trpv4/Dynll1/Tbx3/Aacs/Vgf/Rac1/Tac1/Ica1/Vamp8/Tmf1/Jagn1/Tm7sf3/Ltbp4/Trpm4/Fzd4/Ucp2/Adm/Pde3b/Stx4a/Kcnq1/Irs2/Fgfr1/Rab11fip1/Cacna1a/Exoc3l/Agt/Snx19/Myo5a/Hmgn3/Foxl2/Gja1/Mcu/Pfkl/Midn/Hmga2/Lrp1/Selenom/Igfbp3/Egfr/Nlgn2/Nos2/Stxbp4/Hif1a/Chg…	99
GO:0061458	BP	GO:0061458	reproductive system development	118/3832	453/23174	1.46044e-07	0.000897587	1.52304e-06	Ptprn/Serpine2/Bcl2/Pla2g4a/Ptgs2/Gata3/Notch1/Lrp2/Itga4/Itgav/Cd44/Eif2s2/Src/Ptgis/Cebpb/Bmp7/Adrm1/Col9a3/Hey1/Tiparp/Sfrp2/Vcam1/Lef1/Ccn1/Chd7/Dmrta1/Dhcr24/Abcb1a/Nos3/Eif2b4/Pdgfra/Kit/Kdr/Pkd2/Tbx3/Tmed2/Vgf/Serpine1/Lfng/Ptn/Gata2/Tmf1/Vwf/Ybx3/Plaur/Erf/Gas2/Nr2f2/Fzd4/Adm/Htra1/Igf2/Cdkn1c/Ccnd1/Gab1/Mmp2/Agt/Pgr/Icam1/Epor/Stra6/Map2k1/Foxl2/Plcd1/Map7/Hey2/Prdm1/Gja1/Sgpl1/Jmjd1c/Ar…	118
GO:1901214	BP	GO:1901214	regulation of neuron death	100/3832	368/23174	1.50177e-07	0.000922987	1.56146e-06	Casp8/Bcl2/En1/Rab29/Adora1/Capn2/Cd34/Optn/Gata3/Nsmf/Grin1/Kcnip3/Prnp/Kcnb1/Cebpb/Prkci/Slc7a11/Nes/Gba/Csf1/Casp6/Sigmar1/Nr4a3/Ppt1/Hdac1/Cdc42/Tnfrsf1b/Nmnat1/Agrn/Fgfr3/Htt/Wfs1/Kdr/Rest/Rilpl1/Fzd9/Ptprz1/Hipk2/Zfp746/Gpnmb/Snca/Grid2/Chl1/Itpr1/Tnfrsf1a/Mag/Gpi1/Ptpn5/Chrna7/Rras2/Hmox1/Cacna1a/Cx3cl1/Aars/Agt/Nrp1/Epor/Cbl/Hyou1/Il18/Neo1/Foxb1/Rhoa/Gpx1/Map3k5/Fyn/Unc5b/Agap2/Lrp1/Erbb…	100
GO:0014910	BP	GO:0014910	regulation of smooth muscle cell migration	34/3832	84/23174	1.52465e-07	0.000937048	1.58053e-06	Arpc2/Bcl2/Sema6d/Src/F3/Nr4a3/Serpine1/Pdgfa/Nox4/P2ry2/Agt/Pdgfd/Pgr/Il18/Myo5a/Lrp1/Igfbp3/Vtn/Rps6kb1/Ace/Dock4/Il6st/Dock5/Has2/Trib1/Myc/Ptk2/Pdgfb/Rapgef3/Adamts1/Ppard/Rab5a/Pcsk5/Prkg1	34
GO:0006650	BP	GO:0006650	glycerophospholipid metabolic process	68/3832	223/23174	1.55778e-07	0.000957414	1.61009e-06	Inpp1/Pgap1/Acsl3/Pla2g4a/Pigc/Capn2/Bpnt1/Agpat2/Gpcpd1/Plcb1/Abhd12/Pigt/Pld1/Impad1/Inpp5b/Fabp3/Scarb1/Pdgfa/Pyurf/Hdhd5/Etnk1/Mboat7/Rab38/Inppl1/Far1/Pik3c2a/Cdipt/Pnpla6/Inpp4b/Lpcat2/Ldlr/Pigyl/Lipc/Plscr1/Pik3cb/Abhd5/Chpt1/Dgka/Pla2g3/Pigl/Pigs/Pik3cg/Ttc7b/Aldh5a1/Ptdss1/Lpcat1/Serinc5/Pik3r1/Abhd6/Mtmr6/Htr2a/Dgkh/Enpp2/Gpaa1/Pdgfb/Pcyt1a/Synj1/Synj2/Pgp/Agpat1/Lclat1/Socs5/Ttc7/Abhd3…	68
GO:0052547	BP	GO:0052547	regulation of peptidase activity	108/3832	406/23174	1.58034e-07	0.000971275	1.62857e-06	Stat1/Cflar/Casp8/Serpine2/Col4a3/Ptgs2/Itih5/Grin1/Gsn/Tfpi/Mtch2/Rag1/Cd44/Ddrgk1/Src/Mmp9/Tnfsf10/Siah2/Lxn/Sfrp2/Efna1/S100a8/S100a9/Ecm1/F3/Lef1/Ccn1/Bcl10/Lyn/Asph/Vcp/Klf4/Dhcr24/Hdac1/Rps6ka1/Htt/Rest/Hip1r/Hip1/Serpine1/Col28a1/Cav1/Cycs/Nod1/Snca/Eif2ak3/Antxr1/Timp4/Ret/A2m/Plaur/Gpi1/Pdcd5/Rcn3/Furin/Serpinh1/Arl6ip1/Gas6/Dlc1/Spock3/Ndufa13/Wfdc1/Agt/Birc3/Cryab/Uaca/Map2k5/Smad3/Cd1…	108
GO:0044262	BP	GO:0044262	cellular carbohydrate metabolic process	81/3832	281/23174	1.60026e-07	0.000983517	1.64423e-06	Inpp1/Rpe/B3gnt7/Per2/Pfkfb2/Hsd11b1/Mtch2/Ext2/Src/Gyg/Agl/Manba/Acadm/Ppp3r2/Lepr/Zmpste24/Inpp5b/Sesn2/Pgd/Pgm2/Acacb/Gusb/Foxk1/Fam3c/Adcyap1r1/Abcg2/Snca/Dysf/Gfpt1/Tpi1/Gys1/Dgat2/Mogat2/Igf2/Irs2/Csgalnact1/B3gnt3/Inpp4b/Phkb/Mlycd/Slc37a4/Treh/Rora/Pth1r/Glb1/Plcd1/Epm2a/Enpp1/Midn/Gnptab/Igfbp3/Grb10/Ugp2/B3gnt2/Adra1b/Nfe2l1/Kat2a/Stat3/Gaa/Hif1a/Il6st/Ext1/Has2/Pfkm/Ppp1r2/Synj1/Synj2/…	81
GO:0003205	BP	GO:0003205	cardiac chamber development	61/3832	193/23174	1.65546e-07	0.00101745	1.69595e-06	Fhl2/Tnnt2/Gata3/Notch1/Eng/Lrp2/Dll4/Fkbp1a/Ccm2l/Bmp7/Hey1/Sfrp2/Col11a1/Ccn1/Chd7/Tek/Zmpste24/Heyl/Luzp1/Nos3/Tgfbr3/Fgfrl1/Tbx3/Plxnd1/Tgfb1/Kif7/Foxf1/Zfpm1/Nrp1/Dnm2/Epor/Stra6/Tpm1/Nphp3/Tgfbr2/Adgrg6/Hey2/Prdm1/Lrp1/Mks1/Nog/Id2/Hif1a/Trip11/Ryr2/Foxc1/Adamts6/Bmp4/Myh6/Grhl2/Zfpm2/Ly6e/Tbx1/Hes1/Adamts1/Ptk7/Ltbp1/Greb1l/Nfatc1/Pcsk5/Rbp4	61
GO:0007215	BP	GO:0007215	glutamate receptor signaling pathway	35/3832	88/23174	1.68376e-07	0.00103484	1.71989e-06	Ncstn/Grin1/Prnp/Plcb1/Kcnb1/Nlgn1/Gria2/Grin3a/Frrs1l/Grm3/Anxa3/Shisa7/Homer2/Grm5/Cx3cl1/Necab2/Rasgrf1/Fyn/Cpeb4/Shisa6/Nlgn2/Cacng4/Rgs9/Sstr1/Homer1/Arc/Grin2a/Shisa9/App/Grik1/Nrxn1/Neto1/Dagla/Fmr1/Nlgn3	35
GO:0042982	BP	GO:0042982	amyloid precursor protein metabolic process	26/3832	56/23174	1.71389e-07	0.00105336	1.74554e-06	Itm2c/Soat1/Ncstn/Prnp/Fkbp1a/Efna1/Aph1a/Lyn/Dhcr24/Ldlrap1/Gsap/Chrna7/Spon1/Necab2/Adam10/Lrrtm3/Abca7/Hap1/Rock2/Tmed10/Itm2b/Dlg1/App/Bace2/Abcg1/Itm2a	26
GO:0031346	BP	GO:0031346	positive regulation of cell projection organization	120/3832	464/23174	1.74092e-07	0.00106997	1.7679e-06	Cflar/Fn1/Arpc2/Serpine2/Dnm3/Prkcq/Grin1/Hspa5/Itga6/Nckap1/Src/Bmp7/Nlgn1/Prkci/Skil/Mfn1/Rapgef2/S100a9/Rap1a/Plppr5/Lyn/Ptprd/Akirin1/Wasf2/Cdc42/Agrn/Htt/Tapt1/Kit/Dynll1/Cux2/P2rx7/Ache/Rac1/Tmem106b/Ptprz1/Ptn/Creb3l2/Itpr1/Camk1/Plxnd1/Cxcl12/Ret/Eps8/Caprin2/Arhgap35/Ptpn5/Ntrk3/Cpeb1/Fzd4/P2ry2/Arap1/Fgfr1/Gpm6a/Cx3cl1/Agt/Disc1/Nrp1/Itgb1/Dnm2/Epor/Sept7/Map2k1/Rab11a/Tmem30a/Snap91/Nc…	120
GO:0046578	BP	GO:0046578	regulation of Ras protein signal transduction	69/3832	228/23174	1.74784e-07	0.00107422	1.76977e-06	Arfgef1/Arhgef4/Farp2/Itpkb/Notch1/Dennd1a/Rasgrp1/Prex1/Spry1/Cdc42se1/Csf1/Vav3/Ssx2ip/Arhgef10l/Plekhg5/Arhgap24/Mmd2/Arhgef5/Iqsec1/Fgd5/Eps8/Arhgap35/Gpr4/Cadm4/Rasgrp4/Rasip1/Akap13/Rasa3/Arhgef10/Dlc1/Fbxo8/Psd3/Ripor1/Nrp1/Itgb1/Dnm2/Cbl/Map2k1/Rasgrf1/Adra1b/Arhgap44/Arhgef15/Tnfaip1/Nf1/Arhgdia/Itsn2/Arf6/Sos2/Plekhg3/Net1/F2rl1/F2r/F2rl2/Arhgef28/Ccdc125/Arhgef3/Arhgef40/Spata13/Spry2/…	69
GO:1903391	BP	GO:1903391	regulation of adherens junction organization	28/3832	63/23174	1.83266e-07	0.00112635	1.85027e-06	Ptprj/Src/Tek/Col16a1/Limch1/Kdr/Rac1/Iqsec1/Dlc1/Nrp1/Rdx/Peak1/Smad3/Lims1/Lrp1/Dusp3/Arf6/Dusp22/Enpp2/Ptk2/Acvrl1/Ppm1f/Apod/Phldb2/Vegfa/Rhod/Slk/Arhgap6	28
GO:0002064	BP	GO:0002064	epithelial cell development	73/3832	246/23174	1.85319e-07	0.00113897	1.86559e-06	Abi2/F11r/Vim/Notch1/Eng/Nkx2-2/Id1/Ppp1r16b/Adrm1/Sox18/Arhgef26/Rapgef2/Rap1a/Tmod1/Epha2/Abcb1a/Abcb1b/Fgfr3/Rest/Rilpl1/Rac1/C1galt1/Tnfrsf1a/Gpr4/Tjp1/Fgfr1/Fat1/Cdh5/Agt/Pgr/S1pr2/Icam1/Rdx/Bfsp2/Gpx1/Map7/Prdm1/Gja1/Jmjd1c/Pcdh15/Col18a1/Xbp1/Vezf1/Pecam1/Sox9/Slc9a3r1/Fasn/Rock2/Frmd6/Hif1a/F2rl1/Marveld2/Map3k1/Flnb/Bmp4/Slitrk6/Grhl2/Pdgfb/Wnt7b/Rapgef3/Rarg/Cldn5/Dll1/Sox8/Notch4/Clic5…	73
GO:0006024	BP	GO:0006024	glycosaminoglycan biosynthetic process	21/3832	40/23174	1.90563e-07	0.0011712	1.91286e-06	Chpf/Ext2/Chst14/Nfkb1/Ugdh/Tgfb1/Xylt1/Csgalnact1/Chst5/Hexa/Glce/Dse/Chst3/Chst11/Cltc/Xylt2/Ext1/Has2/Pdgfb/Ccnd3/Chst7	21
GO:0061383	BP	GO:0061383	trabecula morphogenesis	25/3832	53/23174	2.01158e-07	0.00123632	2.01341e-06	Fhl2/Slc40a1/Notch1/Eng/Dll4/Fkbp1a/Ccm2l/Bmp7/Hey1/Chd7/Tek/Fgfr3/Tgfbr3/Mmp2/Rhoa/Adgrg6/Hey2/Nog/Sema4d/Adamts1/Vegfa/Fbn2/Ppargc1b/Nfatc1/Rbp4	25
GO:0042692	BP	GO:0042692	muscle cell differentiation	105/3832	394/23174	2.11981e-07	0.00130283	2.11565e-06	Adgrb3/Fhl2/Cflar/Dner/Bcl2/Tnnt2/Capn2/Itga8/Hacd1/Nebl/Notch1/Plpp7/Eng/Tanc1/Nfatc2/Hey1/Lmna/Pdlim5/Acadm/Tmod1/Zmpste24/Slc9a1/Selenon/Wdr1/Sgcb/Pdgfra/Kit/Tbx3/Atp2a2/Cav2/Dysf/Camk1/Cxcl12/Cd9/Bhlhe41/Ehd2/Dmpk/Tgfb1/Nphs1/Tshz3/Akap13/Nox4/Stim1/Adm/Sox6/Il4ra/Igf2/Cd81/Slc25a4/Foxf1/Agt/Itgb1/Olfm2/Barx2/AW551984/Neo1/Rbpms2/Rora/Cacna2d2/Gpx1/Syne1/Hey2/Atg5/Csrp2/Xbp1/Adra1b/Sgcd/Il4/P…	105
GO:0002573	BP	GO:0002573	myeloid leukocyte differentiation	66/3832	216/23174	2.16568e-07	0.00133103	2.15233e-06	Casp8/Farp2/Lbr/Gata3/Traf6/Fbn1/Rassf2/Plcb1/Src/Cebpb/Gnas/Car2/Tspan2/Csf1/Lef1/Lyn/Tal1/Epha2/Fgfr3/Kit/Gata2/Mitf/Cd4/Ltbr/Clec2d/Relb/Tgfb1/Lrrk1/Cd81/Inpp4b/Il34/Zfpm1/Anxa2/Cd109/Trf/Tgfbr2/Ccr1/Ostm1/Il4/Nf1/Fasn/Asxl2/Id2/Zfp36l1/Ripk1/Ror2/F2rl1/Pik3r1/Bmp4/Klf10/Trib1/Myc/Nrros/Tfrc/App/Vegfa/Ndfip1/Ppargc1b/Ptpn2/Nfatc1/Tjp2/Chuk/Sh3pxd2a/Gpc3/Atp6ap1/Gab3	66
GO:0032231	BP	GO:0032231	regulation of actin filament bundle assembly	39/3832	104/23174	2.16891e-07	0.00133301	2.15233e-06	Tmeff2/Prkcq/Id1/Rhoc/Synpo2/Kank4/Wasf2/Asap3/Arhgef10l/Limch1/Pxn/Rac1/Tac1/Arhgef5/Nox4/Arap1/Swap70/Arhgef10/Dlc1/Cx3cl1/Nrp1/Rdx/Smad3/Tpm1/Rhoa/Ccn2/Arhgef15/Pfn1/Rock2/Pik3r1/Sorbs3/Rgcc/Rapgef3/Ppm1f/Phldb2/Cd47/Prkn/Kank3/Arhgap6	39
GO:0031032	BP	GO:0031032	actomyosin structure organization	63/3832	203/23174	2.18604e-07	0.00134354	2.16316e-06	Tmeff2/Cflar/Tnnt2/F11r/Fam171a1/Prkcq/Nebl/Src/Rhoc/Tmod1/Epb41l4b/Kank4/Lurap1/Epb41/Wasf2/Asap3/Arhgef10l/Wdr1/Limch1/Pdgfra/Pxn/Eln/Rac1/Tac1/Zyx/Arhgef5/Rtkn/Myh14/Akap13/Nox4/Arap1/Arhgef10/Dlc1/Nrp1/Itgb1/Smad3/Tpm1/Rhoa/Pdcd6ip/Ccn2/Epb41l2/Cnn2/Csrp2/Arhgef15/Pfn1/Tnfaip1/Rock2/Frmd6/Six4/Cdc42bpb/Edn1/Pik3r1/Myh6/Sorbs3/Rgcc/Myh9/Rapgef3/Ppm1f/Phldb2/Cd47/Kank3/Fhod3/Arhgap6	63
GO:0009896	BP	GO:0009896	positive regulation of catabolic process	110/3832	418/23174	2.20034e-07	0.00135233	2.17114e-06	Sox17/Bag2/Hecw2/Sh3bp4/Ralb/Adora1/Rab3gap2/Optn/Prr5l/Eif2ak4/Ddrgk1/Usp13/Tiparp/Sh3d19/Gba/Mov10/Mettl14/Wwp1/Vcp/Tmem59/Plk3/Sesn2/Tnfrsf1b/Htt/Kdr/Cnot6l/Chfr/P2rx7/Zc3hav1/Nod1/Snca/Rab7/Sirt2/Plekhf1/Svip/Ctsc/Pnpla2/Cd81/Irs2/Adam9/Ndufa13/Hmox1/Nkd1/Disc1/Sesn3/Ldlr/Rdx/Map2k1/Snx1/Vps13c/Abhd5/Fyco1/Epm2a/Gja1/Vsir/Pttg1ip/Lrp1/Rhbdd3/Xbp1/Igfbp3/Adra1b/Irgm1/Il4/Irgm2/Tnfsf12/Rnft1/Ns…	110
GO:0048168	BP	GO:0048168	regulation of neuronal synaptic plasticity	29/3832	67/23174	2.23784e-07	0.00137538	2.20191e-06	Kcnj10/Nsmf/Grin1/Slc4a10/Drd5/Kit/Kdr/Vgf/Rac1/Snca/Shisa7/Slc8a2/Cpeb1/Grm5/Jph3/Agt/Rab11a/Rasgrf1/S100b/Shisa6/Nf1/Arc/Grin2a/Shisa9/App/Grik1/Rab5a/Neto1/Neurl1a	29
GO:0008217	BP	GO:0008217	regulation of blood pressure	62/3832	199/23174	2.33061e-07	0.0014324	2.27278e-06	Adora1/Gpr37l1/Ptgs2/F11r/Atp1a2/Cd34/Eng/Stk39/Gnas/Edn3/Oprl1/Atp1a1/Ece1/Nos3/Drd5/Tac1/Wnk1/Ptpro/Nav2/Chrna7/Nr2f2/Prcp/Adm/Gas6/Adrb3/Hmox1/Agt/Smad3/Tpm1/Manf/Rhoa/Gja1/Tbxa2r/Smtn/Adra1b/Nos2/Asic2/Ramp2/Ace/Id2/Nampt/Agtr1a/Edn1/Adamts16/Erap1/F2rl1/F2r/Pik3r1/Gch1/Myh6/Ednrb/Npr3/Ncald/Pdgfb/Acvrl1/Atp5j/Dll1/Ier3/Lrp5/Plcb3/Acta2/Apln	62
GO:0006023	BP	GO:0006023	aminoglycan biosynthetic process	24/3832	50/23174	2.33274e-07	0.0014337	2.27278e-06	Chpf/B3gnt7/Ext2/Chst14/Nfkb1/Ugdh/Tgfb1/Xylt1/Csgalnact1/B3gnt3/Chst5/Hexa/Glce/Dse/Chst3/Chst11/B3gnt2/Cltc/Xylt2/Ext1/Has2/Pdgfb/Ccnd3/Chst7	24
GO:0099054	BP	GO:0099054	presynapse assembly	24/3832	50/23174	2.33274e-07	0.0014337	2.27278e-06	Nlgn1/Slitrk3/Sdcbp/Ptprd/Snca/Grid2/Clstn3/Lrrc4b/Ntrk3/Lrrtm3/Nlgn2/Lrfn5/Mdga2/Arf6/Pcdh17/Slitrk1/Eif4g1/Il1rap/App/Nrxn1/Cbln2/Slitrk2/Il1rapl1/Nlgn3	24
GO:1904035	BP	GO:1904035	regulation of epithelial cell apoptotic process	35/3832	89/23174	2.33597e-07	0.00143568	2.27278e-06	Cflar/Gata3/Gsn/Itga4/Srsf6/Cd40/Prkci/Tek/Hdac1/Tnip2/Wfs1/Kdr/Serpine1/Gata2/Pak4/Gas6/Hmox1/Pgr/Icam1/Col18a1/Xbp1/Il4/Mapk7/Ramp2/Eif2s1/Zfp36l1/Cast/Bmp4/Rgcc/Sema5a/Angptl4/Ecscr/Cd248/Jak2/Pdcd4	35
GO:0099175	BP	GO:0099175	regulation of postsynapse organization	44/3832	124/23174	2.37999e-07	0.00146274	2.30916e-06	Abi2/Dnm3/Grin1/Tanc1/Prnp/Nlgn1/Mfn1/Slc7a11/Efna1/Pdlim5/Ptprd/Cux2/Fzd9/Ptn/Grid2/Caprin2/Shisa7/Lrrc4b/Ntrk3/Mesd/Adam10/Fyn/Srgn/Abhd17a/Arhgap44/Shisa6/Nptx1/Baiap2/Homer1/Arf4/Arc/Nptxr/Lrrk2/Crkl/Il1rap/Chmp2b/Nrxn1/Lrrtm2/Abhd17b/Cask/Il1rapl1/Arhgef9/Nlgn3/Bhlhb9	44
GO:0090092	BP	GO:0090092	regulation of transmembrane receptor protein serine/threonine kinase signaling pathway	69/3832	230/23174	2.52213e-07	0.0015501	2.44027e-06	Inhbb/Itga8/Notch1/Adamtsl2/Eng/Hspa5/Lrp2/Fbn1/Fkbp1a/Bmp7/Pmepa1/Skil/Wwtr1/Sfrp2/Ccn1/Sdcbp/Cdkn2b/Hes5/Emilin1/Htra3/Kdr/Tgfbr3/Cav2/Cav1/Kcp/Hipk2/Strap/Tgfb1/Furin/Tgfb1i1/Htra1/Rbpms/Snx25/Gipc1/Zfp423/Glg1/Dnm2/Neo1/Smad3/Snx1/Cd109/Vsir/Chst11/Xbp1/Vwc2/Sptbn1/Lgals9/Nog/Adam17/Sostdc1/Inhba/Hfe/Foxd1/Pelo/Bmp4/Dab2/Acvrl1/Chrd/Hes1/Nrros/Csnk2b/Ltbp1/Zeb1/Lox/Fbn2/Ldlrad4/Tcf7l2/Gpc3/Ch…	69
GO:0007517	BP	GO:0007517	muscle organ development	111/3832	424/23174	2.58001e-07	0.00158568	2.48936e-06	Sox17/Col19a1/Cflar/Des/Dner/Bcl2/Tnnt2/Hlx/Notch1/Eng/Lrp2/Dll4/Cops2/Gpcpd1/Fkbp1a/Ccm2l/Lama5/Myt1/Hey1/Skil/Serp1/Mbnl1/Lmna/Col11a1/Lef1/Chd7/Heyl/Akirin1/Selenon/Id3/Sgcb/Tgfbr3/Fgfrl1/Eln/Foxk1/Cav2/Cav1/Vamp5/Dysf/Ybx3/Tgfb1/Sirt2/Nphs1/Myh14/Nr2f2/Sox6/Coprs/Fgfr1/Slc25a4/Zfpm1/Epor/Usp2/Cryab/Stra6/Smad3/Tpm1/Foxl2/Rhoa/Gpx1/Tgfbr2/Hey2/Cd164/Gja1/Egr2/Arid5b/S100b/Adarb1/Hmg20b/Myl6/Er…	111
GO:0006836	BP	GO:0006836	neurotransmitter transport	84/3832	298/23174	2.73925e-07	0.00168354	2.62942e-06	Pnkd/Per2/Sept2/Atp1a2/Kcnj10/Slc30a1/Tor1a/Snap23/Rims4/Edn3/Chrna4/Nlgn1/Slc7a11/Syt11/Rap1a/Kcnc4/Lyn/Grin3a/Slc44a1/Slc6a9/Ppt1/Nat8l/Htt/Git2/Rph3a/Atp2a2/P2rx7/Stx2/Ica1/Snca/Vamp8/Slc6a11/Slc6a1/Syn2/Slc25a18/Kcnc3/Chrna7/P2ry2/Arl6ip1/Prkcb/Stx4a/Cln8/Nr3c2/Ednra/Gipc1/Cacna1a/Unc13c/Myo6/Snap91/Cspg5/Epm2a/Syde1/Slc1a6/Slc6a15/Xbp1/Ddc/Slc36a1/Adora2b/Nf1/Trim9/Edn1/Mctp1/Sv2c/Sncg/Htr2a…	84
GO:0045862	BP	GO:0045862	positive regulation of proteolysis	89/3832	321/23174	2.74027e-07	0.00168417	2.62942e-06	Bag2/Stat1/Casp8/Col4a3/Grin1/Gsn/Mtch2/Ddrgk1/Src/Tnfsf10/Usp13/Sfrp2/Sh3d19/Gba/Efna1/S100a8/S100a9/F3/Ccn1/Bcl10/Lyn/Asph/Vcp/Plk3/Tnfrsf1b/Rest/Chfr/Hip1r/Hip1/Cycs/Nod1/Snca/Eif2ak3/Antxr1/Ret/Sirt2/Hpn/Pdcd5/Rcn3/Ctsc/Spon1/Adam9/Dlc1/Ndufa13/Disc1/Angptl8/Uaca/Cln6/Smad3/Ctsh/Foxl2/Rhoa/Map3k5/Ccn2/Fyn/Vsir/Xbp1/Cyfip2/Tnip1/Rnft1/Stat3/Trib2/Rock2/Rnf144a/Rnf144b/Nkd2/F2r/Sox7/Dab2/Dap/Rn…	89
GO:0030111	BP	GO:0030111	regulation of Wnt signaling pathway	82/3832	289/23174	2.79923e-07	0.00172041	2.67862e-06	Sox17/Nrarp/Notch1/Frzb/Usp8/Src/Sulf2/Tbl1xr1/Wwtr1/Siah2/Sfrp2/Lef1/Dkk2/Nfkb1/Vcp/Trabd2b/Rspo1/Hdac1/Ptpru/Fgfr3/Fzd9/Cav1/Wnt5b/Wnk1/Ptpro/Caprin2/Dact3/Trpm4/Lrrk1/Adgra2/Nkd1/Cyld/Cdh3/Disc1/Smad3/Nphp3/Limd1/Snx3/Bicc1/Lgr5/Hmga2/Lrp1/Kremen1/Znrf3/Grb10/Egfr/Shisa6/Tmem88/Hic1/Rnf43/Mks1/Nog/Axin2/Sox9/Slc9a3r1/Rnf213/Notum/Sostdc1/Ror2/Nkd2/Zbed3/Lats2/Sox7/Scel/Gpc5/Dab2/Sema5a/Fzd6/So…	82
GO:0007612	BP	GO:0007612	learning	55/3832	170/23174	2.81587e-07	0.00173063	2.68715e-06	Adgrb3/En1/Ptgs2/Tnr/Atp1a2/Grin1/Tanc1/Rag1/Eif2ak4/Map1a/Lrrn4/Oprl1/Slc7a11/Bche/Ppt1/Htt/Drd5/Atp8a1/Kit/Nptx2/Tac1/Ptn/Slc6a1/Hrh1/Slc8a2/Chrna7/Grm5/Cln8/Atxn1l/Jph3/Agt/Itgb1/Stra6/Foxb1/Epm2a/Sgk1/Adra1b/Nf1/Nog/Ppp1r1b/C1ql1/Hif1a/Slc8a3/Pde8b/Arf4/Grin2a/App/Synj1/Prkn/Nrxn1/Neto1/Rin1/Nrxn2/Sorcs3/Nlgn3	55
GO:0008154	BP	GO:0008154	actin polymerization or depolymerization	62/3832	200/23174	2.83824e-07	0.00174438	2.7011e-06	Arfgef1/Abi2/Arpc2/Gsn/Wipf1/Nckap1/Prex1/Tmod1/Kank4/Cap1/Wdr1/Arpc3/Hip1r/Eln/Micall2/Rac1/Arpc1b/Eps8/Arhgap35/Vasp/Nphs1/Arpin/Fchsd2/Swap70/Icam1/Rdx/Pstpip1/Tpm1/Nck1/Rhoa/Arhgap18/Wasf1/Mical1/Rhobtb1/Cobl/Sptbn1/Pfn1/Myo1c/Pecam1/Baiap2/Arf6/Cap2/Jmy/F2rl1/Iqgap2/Map3k1/Rhobtb2/Rictor/Sema5a/Cdc42ep1/Twf1/Lima1/Dlg1/Snx9/Kank3/Fer/Fhod3/Pstpip2/Kank1/Add3/Diaph2/Shroom2	62
GO:0061333	BP	GO:0061333	renal tubule morphogenesis	34/3832	86/23174	2.97856e-07	0.00183062	2.82557e-06	Eya1/Wnt6/Bcl2/Gata3/Cd44/Lama5/Hey1/Fat4/Hes5/Pkd2/Tgfb1/Col4a1/Irx3/Agt/Lgr5/Nog/Wnk4/Sox9/Six4/Agtr1a/Klhl3/Adamts16/Irx1/Irx2/Foxd1/Bmp4/Myc/Hes1/Dlg1/Sox8/Vegfa/Greb1l/Gpc3/Maged1	34
GO:0072009	BP	GO:0072009	nephron epithelium development	40/3832	109/23174	2.98525e-07	0.00183474	2.82557e-06	Eya1/Wnt6/Bcl2/Gata3/Notch1/Cd44/Lama5/Hey1/Fat4/Wwtr1/Heyl/Hes5/Ptpro/Tgfb1/Irx3/Agt/Nog/Wnk4/Sox9/Six4/Agtr1a/Foxc1/Klhl3/Adamts16/Irx1/Irx2/Foxd1/Bmp4/Myc/Pdgfb/Wnt7b/Hes1/Dlg1/Dll1/Sox8/Vegfa/Greb1l/Gpc3/Maged1/Cited1	40
GO:0061028	BP	GO:0061028	establishment of endothelial barrier	22/3832	44/23174	2.99659e-07	0.0018417	2.82862e-06	F11r/Eng/Ppp1r16b/Sox18/Rapgef2/Rap1a/Abcb1b/Tnfrsf1a/Tjp1/Cdh5/S1pr2/Icam1/Rdx/Fasn/Rock2/F2rl1/Marveld2/Wnt7b/Rapgef3/Cldn5/Tjp2/Msn	22
GO:0009205	BP	GO:0009205	purine ribonucleoside triphosphate metabolic process	77/3832	267/23174	3.13303e-07	0.00192556	2.94942e-06	Ndufs1/Pid1/Pfkfb2/Ndufs2/Atp1a2/Ndufa8/Mtch2/Mfn1/Ak5/Vcp/Ak4/Nmnat1/Iscu/P2rx7/Nipsnap2/Foxk1/Impdh1/Bpgm/Cycs/Snca/Tpi1/Tgfb1/Gpi1/Ldha/Ampd3/Aldoa/Coq9/Sdhd/Mpi/Adpgk/Pkm/Map2k1/Clpx/Rhoa/Uqcrc1/Enpp1/Enpp3/Pfkl/Shmt2/Atp5b/Uqcr10/Ogdh/Myh3/Stat3/Atp5h/Dld/Mbip/Hif1a/Gphn/Entpd5/Prxl2c/Uqcrb/Sdha/Mocs2/Myh6/Htr2a/Prkaa1/Myc/Lrrk2/Pfkm/Atp5g2/Atp5j/Prkn/Uqcc2/Ndufv3/Ier3/Slc25a23/Ndufv2/Rhoq/E…	77
GO:0030199	BP	GO:0030199	collagen fibril organization	25/3832	54/23174	3.15828e-07	0.00194108	2.96517e-06	Col4a3/Mia3/Col5a1/Sfrp2/Col11a1/Plod1/Emilin1/Loxl3/Acan/Serpinh1/Colgalt1/Col5a3/Anxa2/Col12a1/Plod2/P4ha1/Adamts14/Aebp1/Nf1/P3h4/Foxc1/Chadl/Col11a2/Mkx/Lox	25
GO:0007219	BP	GO:0007219	Notch signaling pathway	56/3832	175/23174	3.31189e-07	0.00203549	3.07622e-06	Eya1/Dner/Ncstn/Nrarp/Notch1/Egfl7/Slc35c1/Dll4/Bmp7/Hey1/Fat4/Pear1/Aph1a/Heyl/Hes5/Kit/Lfng/Aak1/Gata2/Cntn6/Timp4/Kcna5/Tgfb1/Dll3/Gas2/Zfp423/Maml2/Adam10/Susd5/Tgfbr2/Hey2/Epn2/Tmem100/Stat3/Sox9/Adam17/Nfkbia/Sel1l/Jag2/Foxc1/Il6st/Cdh6/Ptp4a3/Cntn1/Snai2/Bcl6/Hes1/Dtx3l/Poglut1/App/Dll1/Notch3/Notch4/Mib1/Dtx4/Neurl1a	56
GO:0008016	BP	GO:0008016	regulation of heart contraction	56/3832	175/23174	3.31189e-07	0.00203549	3.07622e-06	Atp2b4/Adora1/Tnnt2/Atp1a2/Edn3/S100a1/Atp1a1/Kcnd3/Pde4b/Zmpste24/Slc9a1/Agrn/Sri/Nos3/Atp2a2/Tac1/Cav1/Kcna5/Dmpk/Trpm4/Hrc/Chrna7/Adm/Glrx3/Kcnq1/Agt/Tpm1/Cacna2d2/Gpd1l/Ccn2/Hey2/Gja1/Ctnna3/Smtn/Adra1b/Kcnj2/Gaa/Chga/Ryr2/Edn1/Pik3r1/Pde4d/Cacna1d/Gch1/Myh6/Dlg1/Atp5j/Ehd3/Epas1/Dsc2/Hbegf/Slc1a1/Jak2/Prkg1/Apln/Dmd	56
GO:0010977	BP	GO:0010977	negative regulation of neuron projection development	56/3832	175/23174	3.31189e-07	0.00203549	3.07622e-06	Itm2c/Rab29/Tnr/Dnm3/Il15ra/Vim/Rtn4rl2/B2m/Sema6d/Id1/Nlgn1/Rapgef2/Efna1/Cers2/Dab1/Sema3d/Cd38/Trpv4/Ptprz1/Mag/Inppl1/Dennd5a/Xylt1/Nrp1/Fat3/Prkcsh/Cspg4/Ptpn9/Neo1/Rhoa/Zfp365/Lrp1/Kremen1/Efemp1/Pmp22/Ntn1/Aatk/Adam17/Ifrd1/Arf6/Bag5/Sema4d/Ptprg/Sema3g/Dab2/Sema5a/Ptk2/Lrrk2/Hes1/Sema5b/H2-K1/H2-D1/Sema6a/Kank1/Nlgn3/Trpc5	56
GO:0034767	BP	GO:0034767	positive regulation of ion transmembrane transport	56/3832	175/23174	3.31189e-07	0.00203549	3.07622e-06	Rgs7/Stk39/Aplnr/Lrrc55/Plcb1/Edn3/S100a1/Asph/Slc9a1/Sri/Abcb1a/Dpp6/Htt/Stim2/Pkd2/P2rx7/Nipsnap2/Snca/Wnk1/Kcna1/Cracr2a/Stim1/Arl6ip1/Kcnq1/Slc25a4/Ednra/Cx3cl1/Agt/Dnm2/Cnksr3/Akap7/Pirt/Atp1b2/Asic2/Hap1/Wnk4/Cacng4/Rgs9/Kcnj2/Slc9a3r1/Ryr2/Agtr1a/Glrx/F2r/Cacna1d/Bmp4/Fgf14/Arc/Rapgef3/Slc9a3r2/Ehd3/Prkg1/Kcnip2/Acsl5/Dmd/Nlgn3	56
GO:0014911	BP	GO:0014911	positive regulation of smooth muscle cell migration	27/3832	61/23174	3.34908e-07	0.00205834	3.09426e-06	Arpc2/Bcl2/Sema6d/Src/F3/Nr4a3/Nox4/P2ry2/Agt/Pdgfd/Pgr/Il18/Myo5a/Lrp1/Vtn/Rps6kb1/Dock4/Il6st/Dock5/Has2/Myc/Ptk2/Pdgfb/Rapgef3/Adamts1/Rab5a/Pcsk5	27
GO:0042058	BP	GO:0042058	regulation of epidermal growth factor receptor signaling pathway	27/3832	61/23174	3.34908e-07	0.00205834	3.09426e-06	Adora1/Ptprj/Mmp9/Errfi1/Zfyve28/Hip1r/Hip1/Tgfa/Rab7/Plaur/Cdh13/Agt/Aplp2/Cbl/Rhbdf1/Hap1/Dusp3/Rhbdf2/Chmp6/Adam17/Itga1/App/Fer/Socs5/Ptpn2/Neurl1a/Afap1l2	27
GO:0006022	BP	GO:0006022	aminoglycan metabolic process	37/3832	98/23174	3.60585e-07	0.00221616	3.32269e-06	Chpf/B3gnt7/Itih5/Chst1/Ext2/Cd44/Chst14/Nfkb1/Impad1/Ugdh/Pglyrp1/Tgfb1/Xylt1/Spock3/Csgalnact1/B3gnt3/Chst5/Hexa/Glce/Cln6/Dse/Spock2/Chst3/Chst11/B3gnt2/Cltc/Xylt2/Sgsh/Foxc1/Habp4/Egflam/Ext1/Has2/Pdgfb/Ccnd3/Chst7/Bgn	37
GO:0060491	BP	GO:0060491	regulation of cell projection assembly	58/3832	184/23174	3.64048e-07	0.00223744	3.34575e-06	Arpc2/Dnm3/Prkcq/Nckap1/Src/Nlgn1/Pld1/Plppr5/Akirin1/Wasf2/Cdc42/Rap1gap/Epha2/Agrn/Htt/Tapt1/Kit/Arhgap24/Dynll1/P2rx7/Rac1/Cav1/Podxl/Eps8/Arhgap35/Arap1/Rhog/Gpm6a/Cyld/Nrp1/Icam1/Dnm2/Sept7/Rdx/Syne1/Atg5/Cobl/Pfn1/Hap1/Sept9/Arf6/Adamts16/F2rl1/Dzip1/Myo10/Kctd17/Cdc42ep1/Twf1/Atg3/Rab5a/Fer/Rhoq/Nrxn1/Atp8b1/Kank1/Neurl1a/Fmr1/Plxnb3	58
GO:0034101	BP	GO:0034101	erythrocyte homeostasis	48/3832	142/23174	3.69948e-07	0.0022737	3.39102e-06	Smap1/Stat1/Flvcr1/Gata3/Lmo2/B2m/Plcb1/Lyn/Ptbp3/Tal1/Prdx1/Kit/Tgfbr3/Sh2b3/Bpgm/Gata2/Gpi1/Rps17/Ampd3/Sox6/Ank1/Mfhas1/Jak3/Klf2/Hmox1/Zfpm1/Ets1/P4htm/Nfe2l1/Stat5b/Stat3/Jmjd6/Id2/Hif1a/Zfp36l1/Inhba/Tmem14c/Sfxn1/Smad5/Bmp4/Bcl6/Adgrf5/Vegfa/Epas1/Fech/Ptpn2/Jak2/Heph	48
GO:0006672	BP	GO:0006672	ceramide metabolic process	33/3832	83/23174	3.79251e-07	0.00233088	3.45809e-06	Neu4/Degs1/St8sia6/Gba/Cers2/Sgms2/Ccn1/Elovl1/P2rx7/Acer3/Smpd1/Cln8/Asah1/Cers1/Fa2h/Hexa/Cln6/Smpd2/Sgpl1/Gal3st1/Gm2a/Ormdl3/Sptssa/Sptlc2/Galc/Itgb8/Aldh5a1/Sptlc1/Samd8/Naga/Cerk/Asah2/Sgms1	33
GO:0072028	BP	GO:0072028	nephron morphogenesis	33/3832	83/23174	3.79251e-07	0.00233088	3.45809e-06	Eya1/Wnt6/Bcl2/Gata3/Cd44/Bmp7/Lama5/Hey1/Fat4/Hes5/Tgfb1/Irx3/Agt/Nog/Wnk4/Sox9/Six4/Agtr1a/Klhl3/Adamts16/Irx1/Irx2/Foxd1/Bmp4/Myc/Hes1/Dlg1/Sox8/Vegfa/Greb1l/Gpc3/Maged1/Cited1	33
GO:0006869	BP	GO:0006869	lipid transport	90/3832	328/23174	3.8841e-07	0.00238717	3.53236e-06	Acsl3/Hdlbp/Pla2g4a/Soat1/Abca2/Slc27a4/Osbpl6/Itgav/Ano3/Atp8b4/Pltp/Abcd3/Pla2g12a/Sigmar1/Ttc39b/Mfsd2a/Fabp3/Ldlrap1/Abcb1a/Abcb4/Crot/Atp8a1/Gltp/P2rx7/Scarb1/Tac1/Cav1/Repin1/Osbpl3/Tmf1/Slco1c1/Slco1a4/Fzd4/Slco2b1/P2ry2/Apobr/Irs2/Atp11a/Msr1/Acsl1/Agt/Ldlr/Stra6/Anxa2/Lipc/Tmem30a/Slco2a1/Osbpl10/Abca7/Lrp1/Esyt1/Selenom/Igfbp3/Atp10b/Pitpna/Nos2/Rps6kb1/Stard3/Ace/Abca8b/Abca6/Nfkbia/Sg…	90
[truncated: 238 more rows]

## Sheet: GO GEN NR4A1 GFP pos 1
	ONTOLOGY	ID	Description	GeneRatio	BgRatio	pvalue	p.adjust	qvalue	geneID	Count
[truncated: 350 more rows]

## Sheet: GO GEN NR4A1 GFP pos 2
	ONTOLOGY	ID	Description	GeneRatio	BgRatio	pvalue	p.adjust	qvalue	geneID	Count
[truncated: 203 more rows]

## Sheet: GO GEN 01 GFP neg 0
	ONTOLOGY	ID	Description	GeneRatio	BgRatio	pvalue	p.adjust	qvalue	geneID	Count
[truncated: 376 more rows]

[truncated: 24 more sheets: GO GEN GFP neg 1, GO GEN GFP neg 2, GO TF NR4A1 GFP 0, GO TF NR4A1 GFP 1, GO TF GFP neg 0, GO TF GFP neg 1, KEGG NR4A1 GFP 0,  KEGG NR4A1 GFP 1, KEGG NR4A1 GFP 2, KEGG GFP neg 0, KEGG GFP neg 1, KEGG GFP neg 2, KEGG TF NR4A1 GFP 0, KEGG TF NR4A1 GFP 1, KEGG TF GFP neg 0, KEGG TF GFP neg 1, TF ENRICH  NR4A1 GFP PATCH, COEXP  NR4A1 GFP PATCH, TF ENRICH GFP neg 1 MATRIX, COEXP TF GENE GFP neg MATRIX …]
